# Supplementary material
Source: PubMed Central journal article supplement (PMC2954233)

## Supporting Information

### **Bimetallic Reductive Elimination from Dinuclear Pd(III) Complexes.**

David C. Powers, Diego Benitez, Ekaterina Tkatchouk, William A. Goddard, III, and Tobias Ritter\*

Department of Chemistry and Chemical Biology, Harvard University

12 Oxford Street, Cambridge, Massachusetts 02138

Materials and Process Simulation Center, California Institute of Technology, Pasadena, California 91125

E-mail: [ritter@chemistry.harvard.edu](mailto:ritter@chemistry.harvard.edu)

## Table of Contents

|                                                                                                    |    |
|----------------------------------------------------------------------------------------------------|----|
| Materials and Methods.....                                                                         | 6  |
| Synthesis and Thermolysis of <b>1</b> (Data Pertaining to Eq 1 and Figure 1).....                  | 6  |
| Iodobenzene Dichloride.....                                                                        | 6  |
| Benzo[ <i>h</i> ]quinolinyl palladium(II) acetate dimer ( <b>9</b> ).....                          | 7  |
| Benzo[ <i>h</i> ]quinolinyl chloro palladium(III) acetate dimer ( <b>1</b> ).....                  | 7  |
| Thermolysis of <b>1</b> .....                                                                      | 8  |
| 10-Chlorobenzo[ <i>h</i> ]quinoline ( <b>2</b> ).....                                              | 9  |
| Thermal Decomposition of <b>1</b> .....                                                            | 9  |
| Rate of C–Cl Reductive Elimination from <b>1</b> as a Function of Temperature.....                 | 9  |
| Eyring Analysis.....                                                                               | 13 |
| Error Analysis for Eyring Data.....                                                                | 13 |
| Rate of C–Cl Reductive Elimination from <b>1</b> as a Function of [Cl <sup>-</sup> ].....          | 14 |
| Rate of C–Cl Reductive Elimination from <b>1</b> as a Function of [OAc <sup>-</sup> ].....         | 16 |
| Synthesis and Thermolysis of <b>10</b> (Data Pertaining to Scheme 1).....                          | 20 |
| [Pd(bhq)(OAc) <sub>2</sub> ] <sub>2</sub> ( <b>10</b> ).....                                       | 20 |
| Benzo[ <i>h</i> ]quinolin-10-ol ( <b>S1</b> ).....                                                 | 21 |
| Benzo[ <i>h</i> ]quinolinyl palladium acetate dimer- <i>d6</i> ( <b>9-d6</b> ).....                | 21 |
| [Pd(bhq)(OAc)(O <sub>2</sub> CCD <sub>3</sub> ) <sub>2</sub> ] <sub>2</sub> ( <b>10-d6</b> ).....  | 22 |
| Ligand Exchange.....                                                                               | 22 |
| Exchange with Exogenous Acetate.....                                                               | 22 |
| Exchange in the Absence of Exogenous Acetate.....                                                  | 24 |
| Comparison of Acetate Scrambling Rate with Rate of C–Cl Reductive Elimination.....                 | 27 |
| Observation of Intermolecular Ligand Exchange.....                                                 | 27 |
| Trimethylsilylpropionate ( <b>S2</b> ).....                                                        | 27 |
| Benzo[ <i>h</i> ]quinolinyl palladium propionate dimer ( <b>S3</b> ).....                          | 27 |
| Benzo[ <i>h</i> ]quinolinyl propionate palladium(III) propionate dimer ( <b>S4</b> ).....          | 28 |
| Ligand exchange between <b>10</b> and <b>S4</b> .....                                              | 29 |
| Analysis of the Pd Containing Byproducts of Reductive Elimination (Data Pertaining to Scheme 2) .. | 31 |
| Derivatization of Pd Containing Byproducts ( <b>3</b> ) with Pyridine.....                         | 31 |
| <i>Trans</i> -dichloro bis(pyridine)palladium(II) ( <b>13</b> ).....                               | 32 |
| <i>Trans</i> -diacetato bis(pyridine)palladium(II) ( <b>14</b> ).....                              | 32 |

|                                                                                                            |    |
|------------------------------------------------------------------------------------------------------------|----|
| Acetato benzo[ <i>h</i> ]quinolinyl-(pyridyl)-palladium(II) ( <b>15</b> ).....                             | 32 |
| Benzo[ <i>h</i> ]quinolinyl palladium(II) chloride dimer ( <b>S6</b> ).....                                | 33 |
| Chloro benzo[ <i>h</i> ]quinolinyl-(pyridyl)-palladium(II) ( <b>16</b> ).....                              | 33 |
| <i>Trans</i> -chloro-acetato bis(pyridine)palladium(II) ( <b>17</b> ).....                                 | 34 |
| Conversion of Pd-Containing Mixture <b>3</b> to <b>9</b> .....                                             | 40 |
| Hammett Analysis Based on Substitution of Benzo[ <i>h</i> ]quinolinyl Ligand (Data Pertaining to Figure 2) | 40 |
| Synthesis of 7-Substituted Benzo[ <i>h</i> ]quinolines.....                                                | 40 |
| 7-Nitrobenzo[ <i>h</i> ]quinoline ( <b>S7</b> ).....                                                       | 40 |
| 7-Aminobenzo[ <i>h</i> ]quinoline ( <b>S8</b> ).....                                                       | 41 |
| 7-Cyanobenzo[ <i>h</i> ]quinoline ( <b>S9</b> ).....                                                       | 41 |
| 7-Formylbenzo[ <i>h</i> ]quinoline ( <b>S10</b> ).....                                                     | 42 |
| 7-Chlorobenzo[ <i>h</i> ]quinoline ( <b>S11</b> ).....                                                     | 43 |
| 7-Iodobenzo[ <i>h</i> ]quinoline ( <b>S12</b> ).....                                                       | 43 |
| 7-Methylbenzo[ <i>h</i> ]quinoline ( <b>S13</b> ).....                                                     | 44 |
| Synthesis of 7-Substituted Benzo[ <i>h</i> ]quinolinyl palladium acetate dimers.....                       | 45 |
| 7-Formylbenzo[ <i>h</i> ]quinolinyl palladium acetate dimer ( <b>S14</b> ).....                            | 45 |
| 7-Chlorobenzo[ <i>h</i> ]quinolinyl palladium acetate dimer ( <b>S15</b> ).....                            | 45 |
| 7-Iodobenzo[ <i>h</i> ]quinolinyl palladium acetate dimer ( <b>S16</b> ).....                              | 46 |
| 7-Methylbenzo[ <i>h</i> ]quinolinyl palladium acetate dimer ( <b>S17</b> ).....                            | 46 |
| 7-Formylbenzo[ <i>h</i> ]quinolinyl chloro palladium(III) acetate dimer ( <b>18b</b> ).....                | 47 |
| 7-Chlorobenzo[ <i>h</i> ]quinolinyl chloro palladium(III) acetate dimer ( <b>18c</b> ).....                | 48 |
| 7-Iodobenzo[ <i>h</i> ]quinolinyl chloro palladium(III) acetate dimer ( <b>18d</b> ).....                  | 48 |
| 7-Methylbenzo[ <i>h</i> ]quinolinyl chloro palladium(III) acetate dimer ( <b>18e</b> ).....                | 49 |
| 10-chlorobenzo[ <i>h</i> ]quinoline-7-carbaldehyde ( <b>19b</b> ).....                                     | 49 |
| 7,10-dichlorobenzo[ <i>h</i> ]quinoline ( <b>19c</b> ).....                                                | 50 |
| 10-chloro-7-iodobenzo[ <i>h</i> ]quinoline ( <b>19d</b> ).....                                             | 51 |
| 10-chloro-7-methylbenzo[ <i>h</i> ]quinoline ( <b>19e</b> ).....                                           | 51 |
| Hammett Study Based on Benzo[ <i>h</i> ]quinolinyl Ligand Substitution.....                                | 52 |
| Hammett Analysis Based on Substitution of Bridging Carboxylate Ligand (Data Pertaining to Figure 3)        | 56 |
| .....                                                                                                      | 56 |
| Benzo[ <i>h</i> ]quinolinyl palladium benzoate dimer ( <b>S18</b> ).....                                   | 56 |
| Benzo[ <i>h</i> ]quinolinyl palladium <i>para</i> -fluorobenzoate dimer ( <b>S19</b> ).....                | 57 |
| Benzo[ <i>h</i> ]quinolinyl palladium <i>para</i> -bromobenzoate dimer ( <b>S20</b> ).....                 | 57 |
| Benzo[ <i>h</i> ]quinolinyl palladium <i>para</i> -acetylbenzoate dimer ( <b>S21</b> ).....                | 58 |

|                                                                                                                                            |     |
|--------------------------------------------------------------------------------------------------------------------------------------------|-----|
| Benzo[ <i>h</i> ]quinolinyl palladium <i>para</i> -nitrobenzoate dimer ( <b>S22</b> ).....                                                 | 58  |
| Benzo[ <i>h</i> ]quinolinyl chloro palladium(III) benzoate dimer ( <b>20a</b> ) .....                                                      | 59  |
| Benzo[ <i>h</i> ]quinolinyl chloro palladium(III) <i>para</i> -fluorobenzoate dimer ( <b>20b</b> ).....                                    | 60  |
| Benzo[ <i>h</i> ]quinolinyl chloro palladium(III) <i>para</i> -bromobenzoate dimer ( <b>20c</b> ) .....                                    | 60  |
| Benzo[ <i>h</i> ]quinolinyl chloro palladium(III) <i>para</i> -acetylbenzoate dimer ( <b>20d</b> ).....                                    | 61  |
| Benzo[ <i>h</i> ]quinolinyl chloro palladium(III) <i>para</i> -nitrobenzoate dimer ( <b>20e</b> ) .....                                    | 61  |
| Hammett Study Based on Bridging Benzoate Substitution .....                                                                                | 62  |
| Apical Ligand Experiment (Data Pertaining to Schemes 3, 4, and 5) .....                                                                    | 68  |
| 2-Phenylpyridyl palladium acetate dimer ( <b>S23</b> ) .....                                                                               | 68  |
| (2-phenylpyridyl) palladium benzoate dimer ( <b>21</b> ) .....                                                                             | 68  |
| (2-phenylpyridyl) palladium <i>p</i> -nitrobenzoate dimer ( <b>23</b> ) .....                                                              | 69  |
| (2-phenylpyridyl) palladium (III) benzoate <i>p</i> -nitrobenzoate dimer ( <b>22</b> ) .....                                               | 70  |
| Thermolysis of (2-phenylpyridyl) palladium (III) benzoate <i>p</i> -nitrobenzoate dimer ( <b>22</b> ) .....                                | 70  |
| Reaction of (2-phenylpyridyl) palladium <i>p</i> -nitrobenzoate dimer ( <b>23</b> ) with benzoyl peroxide ( <b>25</b> )....                | 71  |
| Reaction of (2-phenylpyridyl) palladium <i>p</i> -nitrobenzoate dimer ( <b>23</b> ) with benzoyl(nitrobenzoyl) peroxide ( <b>30</b> )..... | 72  |
| Bis( <i>p</i> -nitrobenzoyl) peroxide ( <b>24</b> ) .....                                                                                  | 72  |
| Benzoyl( <i>p</i> -nitrobenzoyl) peroxide ( <b>30</b> ) .....                                                                              | 73  |
| Reactivity of <b>1</b> in the Presence of Exogenous AcOH (Data Pertaining to Figure 4) .....                                               | 73  |
| Computational Details .....                                                                                                                | 78  |
| Structural Method Validation and Method Comparison .....                                                                                   | 78  |
| Method Validation using structure <b>9</b> .....                                                                                           | 79  |
| Evaluation of stability of isomers of <b>1</b> .....                                                                                       | 79  |
| 1,2-Reductive Elimination .....                                                                                                            | 80  |
| Computed Kinetic Barrier to Disproportionation .....                                                                                       | 81  |
| Computed Reductive Elimination in the Presence of Acid.....                                                                                | 82  |
| Computational Investigation of Reductive Elimination from Cation Complex <b>M</b> .....                                                    | 83  |
| Selected Molecular Orbitals of <b>A</b> .....                                                                                              | 84  |
| XYZ coordinates and selected NBO output: NAO, type, occupation, energy .....                                                               | 85  |
| Evaluation of Kinetic Advantage of Bimetallic Reductive Elimination (Data Pertaining to Eq 6) .....                                        | 142 |
| Cross-Over Experiments (Data Pertaining Scheme 6).....                                                                                     | 151 |
| Cross-Over Between Acetate-Bridged <b>9</b> and Benzoate Bridged <b>S18</b> .....                                                          | 151 |
| Synthesis of Cross-over Intermediate <b>33</b> .....                                                                                       | 151 |
| Thermolysis of Mixture of <b>1</b> , <b>20a</b> , and <b>33</b> .....                                                                      | 151 |

|                                                                                                                               |     |
|-------------------------------------------------------------------------------------------------------------------------------|-----|
| Thermolysis of Mixture of <b>1</b> and <b>20a</b> .....                                                                       | 152 |
| Thermolysis of Mixture of <b>1</b> and <b>20a</b> with Added Benzo[ <i>h</i> ]quinoline ( <b>8</b> ) .....                    | 152 |
| Synthesis and Thermolysis of <b>34</b> (Data Pertaining to Eq 5) .....                                                        | 161 |
| 1,3-Bis(2-methyl-2-cyanopropyl)benzene ( <b>S25</b> ) .....                                                                   | 161 |
| $\alpha,\alpha,\alpha',\alpha'$ -Tetramethyl-1,3-benzenedipropionic acid (H <sub>2</sub> esp) ( <b>S26</b> ) .....            | 161 |
| [Pd <sub>2</sub> (bhq) <sub>2</sub> ]esp ( <b>34</b> ) .....                                                                  | 162 |
| [Pd <sub>2</sub> (bhq) <sub>2</sub> Cl <sub>2</sub> ]esp ( <b>35</b> ) .....                                                  | 162 |
| Determination of H <sub>2</sub> esp ( <b>S26</b> ) vs. AcOH Equilibrium Constant.....                                         | 163 |
| Evaluation of the Relative Rates of Dissociation of Acetate and esp-Bridged Complexes .....                                   | 164 |
| Exchange Between <b>9</b> and <b>S23</b> .....                                                                                | 164 |
| Exchange Between <b>34</b> and <b>S23</b> .....                                                                               | 164 |
| Comparison of Acetate and esp-Bridged Complexes.....                                                                          | 165 |
| Comparison of variable temperature <sup>1</sup> H NMR spectra of <b>9</b> and <b>34</b> .....                                 | 165 |
| Temperature Dependent <sup>1</sup> H NMR of <b>9</b> in Presence of Benzo[ <i>h</i> ]quinoline ( <b>8</b> ).....              | 165 |
| Temperature Dependent <sup>1</sup> H NMR of <b>33</b> in Presence of Benzo[ <i>h</i> ]quinoline ( <b>8</b> ).....             | 165 |
| Rate of C–Cl Reductive Elimination from esp-Bridged <b>35</b> .....                                                           | 165 |
| References.....                                                                                                               | 166 |
| Appendix A: NMR Data .....                                                                                                    | 168 |
| Appendix B: UV vis Data .....                                                                                                 | 228 |
| Appendix C: Electrochemical Data.....                                                                                         | 260 |
| Appendix D: X-ray Crystallographic Analysis .....                                                                             | 261 |
| Benzo[ <i>h</i> ]quinolinyl Palladium Acetate Dimer ( <b>9</b> ) (CCDC 705005).....                                           | 261 |
| (Acetato)(10-benzo[ <i>h</i> ]quinolinato)-chloropalladium(III) Dimer ( <b>1</b> ) (CCDC 705506).....                         | 263 |
| Tris( $\mu$ 2-acetato)-bis(benzo[ <i>h</i> ]quinolinato)- ( $\mu$ 2-chloro)-tripalladium(II) ( <b>3a</b> ) (CCDC 705007)..... | 266 |
| Bis( $\mu$ 2-acetato)-bis(benzo[ <i>h</i> ]quinolinato)-bis(acetatopalladium(III)) ( <b>10</b> ) CCDC 705008) .....           | 270 |
| Appendix E: Reactivity of <b>1</b> with Exogenous Benzo[ <i>h</i> ]quinoline ( <b>8</b> ) .....                               | 274 |
| Synthesis of <b>1</b> in the Presence of Benzo[ <i>h</i> ]quinoline ( <b>8</b> ).....                                         | 274 |
| Addition of Benzo[ <i>h</i> ]quinoline ( <b>8</b> ) to Complex <b>1</b> .....                                                 | 275 |
| Rate of C–Cl Reductive Elimination from <b>1</b> in Presence of Exogenous <b>8</b> .....                                      | 278 |
| Eyring Analysis.....                                                                                                          | 282 |
| Error Analysis for Eyring Data .....                                                                                          | 282 |
| Rate of C–Cl Reductive Elimination from <b>1</b> as a Function of Concentration of <b>8</b> .....                             | 283 |

## Materials and Methods

Reactions were carried out under ambient atmosphere unless otherwise specified. Anhydrous solvents were obtained either by filtration through drying columns<sup>1</sup> (ether, CH<sub>2</sub>Cl<sub>2</sub>) on an mBraun system or by distillation over sodium (ether, pentane). Purified compounds were further dried under high vacuum (0.01–0.05 Torr). Yields refer to purified and spectroscopically pure compounds. Melting points were measured on a Buchi 510 apparatus. All melting points were measured in open capillaries and are uncorrected. NMR spectra were recorded on either a Varian Unity/Inova 500 spectrometer operating at 500 MHz and 125 MHz for <sup>1</sup>H and <sup>13</sup>C acquisitions, respectively, or a Varian Mercury 400 spectrometer operating at 400 MHz and 375 MHz for <sup>1</sup>H and <sup>19</sup>F acquisitions, respectively. Chemical shifts are reported in ppm with the solvent resonance as the internal standard. Data is reported as follows: s = singlet, br = broad, d = doublet, t = triplet, q = quartet, m = multiplet; coupling constants in Hz; integration. UV-VIS spectra were obtained on a Varian Cary 50 Probe UV-visible spectrophotometer. High-resolution mass spectra were obtained on Jeol AX-505 or SX-102 spectrometers at the Harvard University Mass Spectrometry Facilities. Pd(OAc)<sub>2</sub> was purchased from Strem. XeF<sub>2</sub> was purchased from Frontier Scientific. Benzo[*h*]quinoline (**8**) was obtained from TCI America. Acetic acid-*d*<sub>4</sub> and xylene dibromide were purchased from Alfa Aesar. All chemicals were used without purification.

In the manuscript, compound **1** is identical to compound **18a** and compound **2** is identical to compound **19a**.

## Synthesis and Thermolysis of **1** (Data Pertaining to Eq 1 and Figure 1)

### Iodobenzene Dichloride

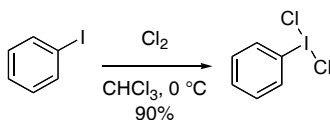

A solution of iodobenzene (5.44 g, 26.7 mmol, 1.00 equiv) in CHCl<sub>3</sub> (30 mL) was cooled to 0 °C. Chlorine gas was vigorously bubbled through the solution for one hour after which time a thick slurry was observed. The solid was isolated by filtration and washed with hexanes (20 mL) to afford 6.60 g of the title compound as a pale yellow solid (90% yield). The title compound was stored at –20 °C in the dark.

<sup>1</sup>H-NMR (500 MHz, CDCl<sub>3</sub>, 23 °C,  $\delta$ ): 8.19 (dd,  $J$  = 8.2 Hz, 1.3 Hz, 2H), 7.60 (tt,  $J$  = 6.7 Hz,  $J$  = 0.9 Hz, 1H), 7.48 (td,  $J$  = 7.3 Hz,  $J$  = 1.4 Hz, 2H). <sup>13</sup>C-NMR (125 MHz, CDCl<sub>3</sub>, 23 °C,  $\delta$ ): 133.79, 132.08, 131.55, 125.30. Mass Spectrometry: LRMS-FIA ( $m/z$ ): 238.91 [C<sub>6</sub>H<sub>5</sub>ClI<sup>+</sup>]. These spectroscopic data are consistent with those reported in the literature.<sup>2</sup>

**Benzo[*h*]quinolinyll palladium(II) acetate dimer (9)**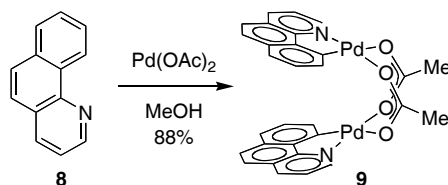

To benzo[*h*]quinoline (**8**) (1.00 g, 5.58 mmol, 1.00 equiv) in MeOH (75 mL) at 23 °C was added Pd(OAc)<sub>2</sub> (1.25 g, 5.58 mmol, 1.00 equiv). After eight hours, the precipitate was isolated by filtration and washed with MeOH (50 mL) and Et<sub>2</sub>O (50 mL), sequentially, to afford 1.68 g of the title compound as a yellow solid (88% yield).

<sup>1</sup>H-NMR (500 MHz, CDCl<sub>3</sub>, 23 °C, δ): 7.82 (dd, *J* = 5.0 Hz, *J* = 1.1 Hz, 2H), 7.44 (dd, *J* = 8.0 Hz, *J* = 1.1 Hz, 2H), 7.25–7.20 (m, 6H), 7.09 (dd, *J* = 6.9 Hz, *J* = 1.1 Hz, 2H), 6.98 (d, *J* = 8.7 Hz, 2H), 6.48 (dd, *J* = 8.0 Hz, *J* = 5.0 Hz, 2H), 2.38 (s, 6H). <sup>13</sup>C-NMR (125 MHz, CDCl<sub>3</sub>, 23 °C, δ): 182.25, 152.92, 148.60, 148.52, 139.74, 135.00, 132.18, 128.71, 127.59, 127.42, 124.70, 122.62, 121.81, 119.52, 24.92. These spectroscopic data correspond to those reported in the literature.<sup>3</sup> UV-VIS Spectroscopy (CH<sub>2</sub>Cl<sub>2</sub>, 23 °C): 425 nm (ε = 2.00 × 10<sup>3</sup> M<sup>-1</sup> cm<sup>-1</sup>); 376 nm (ε = 4.30 × 10<sup>3</sup> M<sup>-1</sup> cm<sup>-1</sup>); 346 nm (ε = 4.18 × 10<sup>3</sup> M<sup>-1</sup> cm<sup>-1</sup>). Mass Spectrometry: LRMS-APCI (m/z): 686.0 [C<sub>30</sub>H<sub>22</sub>N<sub>2</sub>O<sub>4</sub>Pd<sub>2</sub><sup>+</sup>]. Cyclic voltammogram included in Electrochemical Data Section. X-ray data included in X-Ray Data Analysis Section.

**Benzo[*h*]quinolinyll chloro palladium(III) acetate dimer (1)**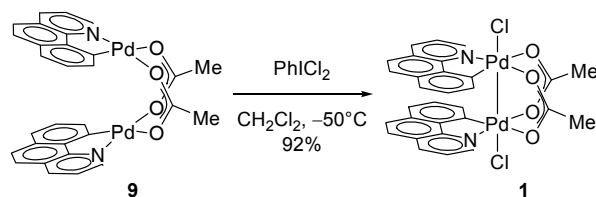

To a solution of benzo[*h*]quinolinyll palladium acetate dimer (**9**) (72.0 mg, 0.105 mmol, 1.00 equiv) in CH<sub>2</sub>Cl<sub>2</sub> (2.5 mL) at –50 °C was added PhICl<sub>2</sub> (28.8 mg, 0.105 mmol, 1.00 equiv). The color of the solution immediately changed from pale yellow to dark red-brown. After stirring at –50 °C for 10 minutes, solvent was removed *in vacuo* at –50 °C. The residue was washed with cold Et<sub>2</sub>O (–50 °C) three times. The remaining solid was dried under vacuum to afford 73.1 mg of the title compound as a dark red solid (92% yield.). X-ray quality crystals were obtained by layering a concentrated CH<sub>2</sub>Cl<sub>2</sub> solution with pentane at –35 °C. Crystallization experiments were carried out in a dry box.

<sup>1</sup>H-NMR (500 MHz, CD<sub>2</sub>Cl<sub>2</sub>, –50 °C, δ): 7.71 (bs, 2H), 7.58 (d, *J* = 7.8 Hz, 2H), 7.45 (dd, *J* = 7.3 Hz, *J* = 7.3 Hz, 2H), 7.35 (d, *J* = 7.8 Hz, 2H), 7.22 (d, *J* = 8.8 Hz, 2H), 7.18 (d, *J* = 7.8 Hz, 2H), 7.03 (d, *J* = 8.3

Hz, 2H), 6.71 (bs, 2H), 2.69 (s, 6H).<sup>1</sup> UV-VIS Spectroscopy (CH<sub>2</sub>Cl<sub>2</sub>, 0 °C): 582 nm ( $\epsilon = 2.99 \times 10^3 \text{ M}^{-1} \text{ cm}^{-1}$ ); 491 nm ( $\epsilon = 7.39 \times 10^3 \text{ M}^{-1} \text{ cm}^{-1}$ ); 417 nm ( $\epsilon = 2.61 \times 10^4 \text{ M}^{-1} \text{ cm}^{-1}$ ); 270 nm ( $\epsilon = 3.69 \times 10^4 \text{ M}^{-1} \text{ cm}^{-1}$ ). X-ray data included in X-Ray Data Analysis Section. Thermal instability prevented both mass spectral as well as elemental analysis from being obtained. <sup>13</sup>C NMR could not be obtained due to low solubility of **1** at temperatures at which **1** is stable.

### Thermolysis of **1**

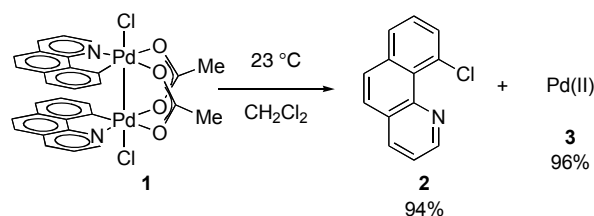

### Isolation of **2**

A solution of benzo[*h*]quinolinyl chloro palladium acetate dimer (**1**) (33.6 mg, 0.0444 mmol, 1.00 equiv) in CH<sub>2</sub>Cl<sub>2</sub> (3mL) was prepared at -50 °C. The solution was warmed to 23 °C. After stirring for three hours at 23 °C, the solution was yellow. Solvent was removed *in vacuo* and the residue was purified by chromatography on silica gel eluting with hexanes / diethyl ether (9:1) to afford 8.9 mg of the title compound as a colorless solid (94% yield).<sup>2</sup>

$R_f = 0.32$  (hexanes/Et<sub>2</sub>O 9:1 (v/v)). <sup>1</sup>H-NMR (500 MHz, CDCl<sub>3</sub>, 23 °C,  $\delta$ ): 9.12 (dd,  $J = 4.4 \text{ Hz}$ ,  $J = 2.0 \text{ Hz}$ , 1H), 8.19 (dd,  $J = 8.3 \text{ Hz}$ ,  $J = 2.0 \text{ Hz}$ , 1H), 7.84 (td,  $J = 7.3 \text{ Hz}$ ,  $J = 1.0 \text{ Hz}$ , 2H), 7.80 (d,  $J = 8.8 \text{ Hz}$ , 1H), 7.72 (d,  $J = 8.8 \text{ Hz}$ , 1H), 7.59–7.55 (m, 2H). <sup>13</sup>C-NMR (125 MHz, CDCl<sub>3</sub>, 23 °C,  $\delta$ ): 147.63, 146.49, 136.32, 135.65, 132.34, 131.53, 128.14, 127.67, 127.60, 127.55, 127.54, 126.62, 121.71. Mass Spectrometry: HRMS-FIA ( $m/z$ ): calcd for [C<sub>13</sub>H<sub>8</sub>NCl+H], 214.0418. Found, 214.0418. These spectroscopic data correspond to those reported in the literature<sup>3</sup> and are identical with those of an authentic sample prepared as described below.

For discussion of the constitution of **3**, please see ‘Analysis of the Pd Containing Byproducts of Reductive Elimination’ below.

<sup>1</sup> Previously, we suggested that chloride for acetate positional exchange in **1** was observed at -10 °C. Re-examination of the temperature-dependent <sup>1</sup>H NMR of **1** has failed to confirm the original assignment; the observed changes in the <sup>1</sup>H NMR sample were a result of adventitious water, not positional exchange.

<sup>2</sup> Chlorination of benzo[*h*]quinolinyl palladium acetate dimer (**9**) was also carried out with excess PhICl<sub>2</sub> according to the procedures outlined above. Treatment of **9** (100 mg, 0.145 mmol, 1.00 equiv) with PhICl<sub>2</sub> (100 mg, 0.364 mmol, 2.50 equiv) at 23 °C afforded 29.1 mg of **2** (94% yield). The observation of >100% yield would suggest that compound **1** could be oxidized beyond the Pd(III) oxidation state by PhICl<sub>2</sub>.



**10-Chlorobenzo[*h*]quinoline (2)**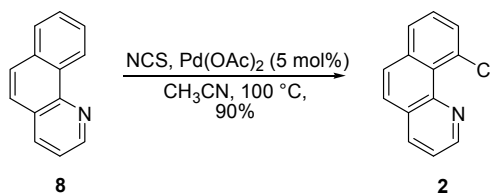

An authentic sample of 10-chlorobenzo[*h*]quinoline (**2**) was prepared according to literature procedures.<sup>3</sup> *N*-Chlorosuccinimide (101 mg, 0.758 mmol, 1.20 equiv) was added to a solution of benzo[*h*]quinoline (**8**) (113 mg, 0.632 mmol, 1.00 equiv) and Pd(OAc)<sub>2</sub> (7.1 mg, 0.032 mmol, 0.050 equiv) in CH<sub>3</sub>CN (5.0 mL). The reaction was heated to 100 °C for 50 hours. The reaction was cooled and solvent was removed *in vacuo*. The residue was purified by chromatography on silica gel eluting with hexanes / benzene (1:1) to afford 121 mg of the title compound (90% yield).

Spectral properties are identical to those reported above.

**Thermal Decomposition of 1****Rate of C–Cl Reductive Elimination from 1 as a Function of Temperature**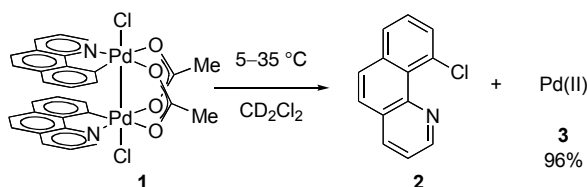

Solutions (20 mM) of compound **9** and PhICl<sub>2</sub> in CD<sub>2</sub>Cl<sub>2</sub> were prepared and stored at –30 °C. An NMR tube was purged with N<sub>2</sub> and cooled to –45 °C. Compound **9** in CD<sub>2</sub>Cl<sub>2</sub> (300 μL) and PhICl<sub>2</sub> in CD<sub>2</sub>Cl<sub>2</sub> (300 μL) were combined. <sup>1</sup>H NMR spectra were obtained; the disappearance of **1** was monitored by the <sup>1</sup>H NMR signal at 2.70 ppm while the evolution of **2** was monitored by the <sup>1</sup>H NMR signal at 9.12 ppm. These signals were integrated relative the residual proton signal from CD<sub>2</sub>Cl<sub>2</sub>. These ratios were converted to concentrations based on the integration of a 20 mM solution of **2** in CD<sub>2</sub>Cl<sub>2</sub>. Since evolution of product was measured, linear natural log plots were obtained by using an infinite time point set to 100% yield (20 mM in **2**). In each case, the reactions were followed to greater than 3 half-lives. Data were fitted to a first order regression; plots, slopes, and R<sup>2</sup> values are reported below.

35 °C

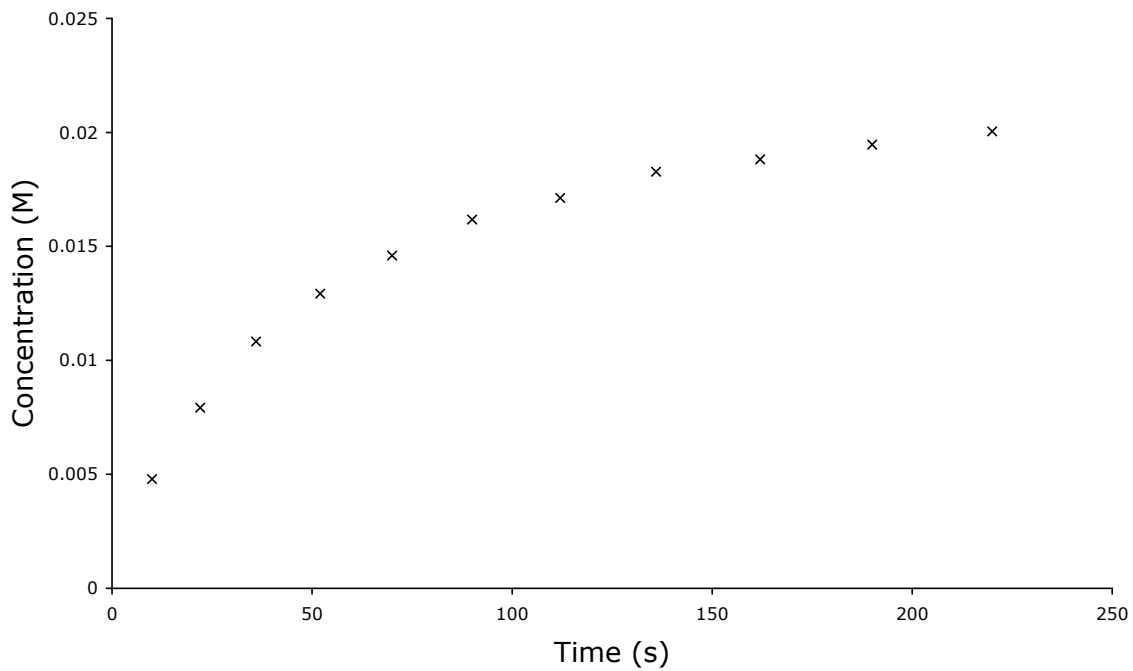

35 °C

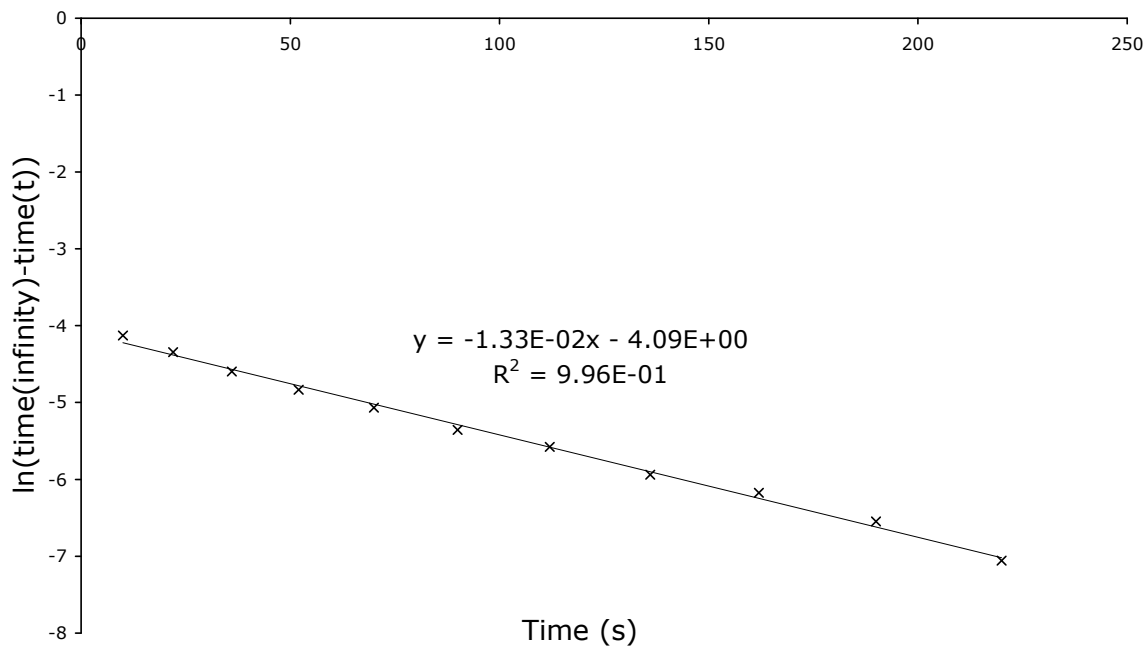

26 °C

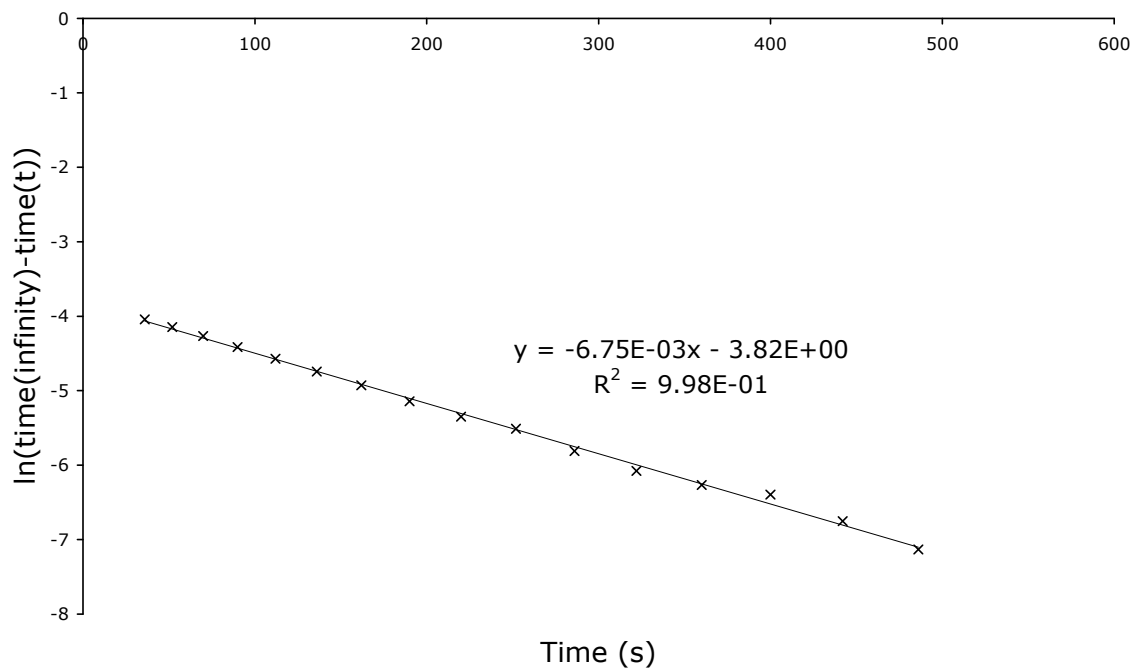

19 °C

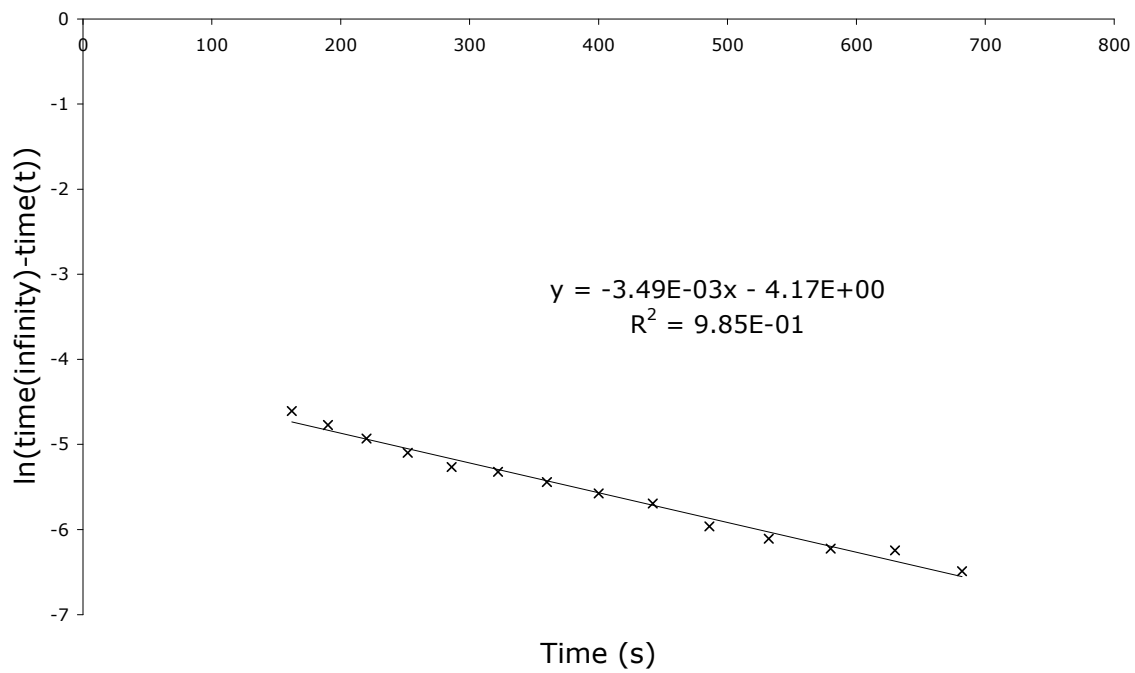

13 °C

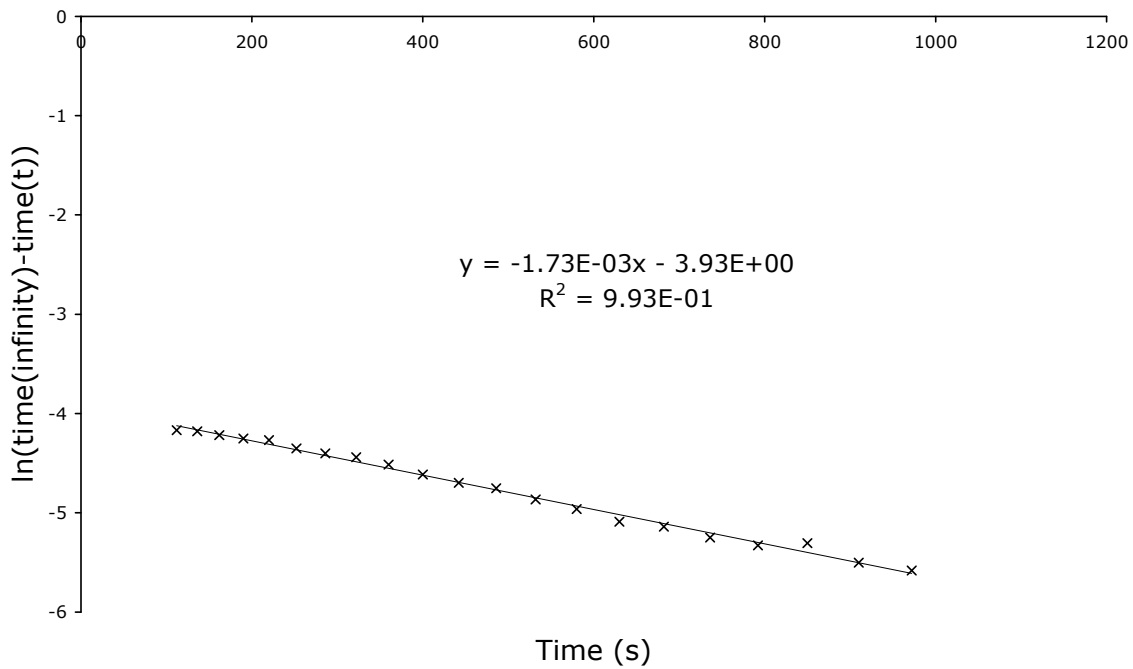

5 °C

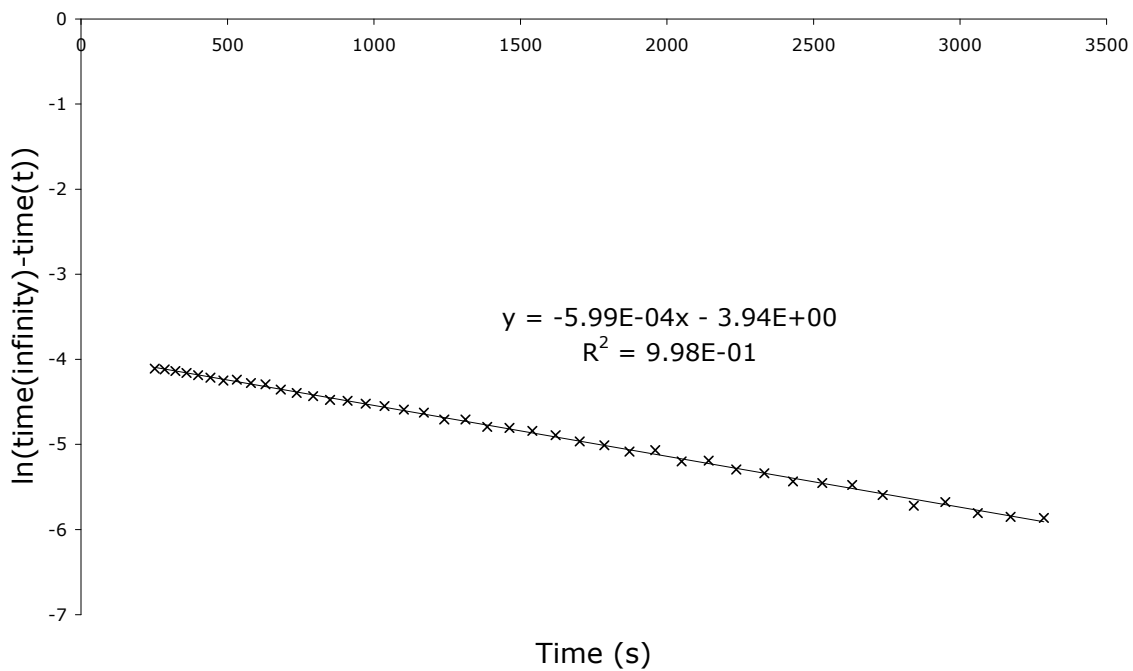

## Eyring Analysis

| <u>Temperature (K)</u> | <u><math>k</math> (s<sup>-1</sup>), R<sup>2</sup></u> |
|------------------------|-------------------------------------------------------|
| 278.37                 | $5.99 \times 10^{-4}$ ; 0.998                         |
| 286.50                 | $1.73 \times 10^{-3}$ ; 0.993                         |
| 292.46                 | $3.49 \times 10^{-3}$ ; 0.985                         |
| 299.50                 | $6.75 \times 10^{-3}$ ; 0.998                         |
| 308.03                 | $1.32 \times 10^{-2}$ ; 0.997                         |

Eyring Plot for Formation of **2**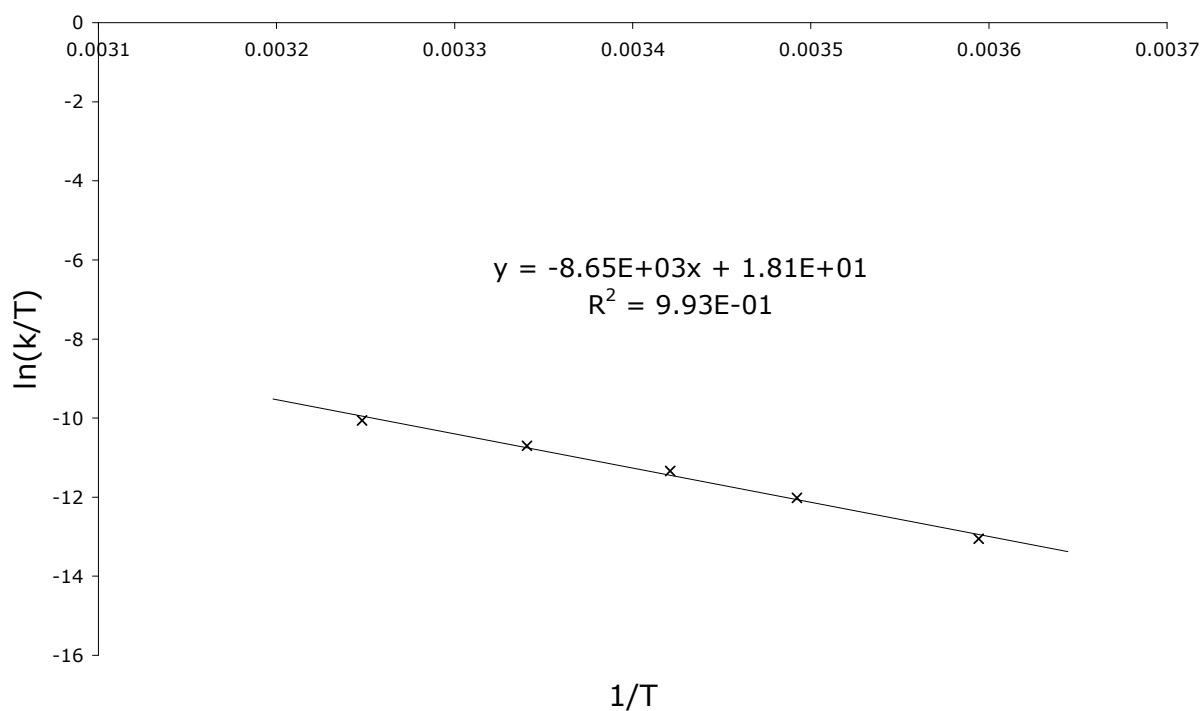

## Error Analysis for Eyring Data

|               | <u>Slope</u> | <u>Intercept</u> | <u><math>\Delta H^\ddagger</math></u> | <u>Difference</u> | <u><math>\Delta S^\ddagger</math></u> | <u>Difference</u> | <u><math>\Delta G^\ddagger</math></u> | <u>Difference</u> |
|---------------|--------------|------------------|---------------------------------------|-------------------|---------------------------------------|-------------------|---------------------------------------|-------------------|
| calcd + error | -7271        | 13.43            | 14.5                                  | -2.7              | -20.5                                 | -9.3              | 20.4                                  | -0.1              |
| calcd         | -8647        | 18.13            | 17.2                                  | 0.0               | -11.2                                 | 0.0               | 20.5                                  | 0.0               |
| calcd - error | -10022       | 22.84            | 19.9                                  | 2.7               | -1.8                                  | 9.4               | 20.6                                  | 0.1               |

**Rate of C–Cl Reductive Elimination from 1 as a Function of [Cl<sup>-</sup>]**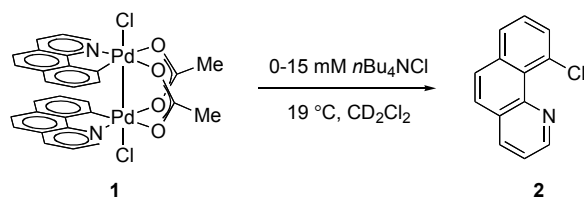

Stock solutions of compound **9** (29.2 mM) and *n*Bu<sub>4</sub>NCl (80.0 mM) were prepared in CD<sub>2</sub>Cl<sub>2</sub>. In a nitrogen-filled dry box, compound **9** (350 μL) was diluted with *n* μL CD<sub>2</sub>Cl<sub>2</sub> in an NMR tube before 350–*n* μL *n*Bu<sub>4</sub>N<sub>4</sub>Cl was added to the NMR tube. PhICl<sub>2</sub> (2.8 mg, 1.0 equiv) was added to the NMR tube as a solid. <sup>1</sup>H NMR spectra were obtained; the evolution of **2** was monitored by the <sup>1</sup>H NMR signal at 9.12 ppm. These signals were integrated relative the residual proton signal from CD<sub>2</sub>Cl<sub>2</sub>. Since evolution of product was measured, linear natural log plots were obtained by using an infinite time point set to 100% yield. In each case, the reactions were followed to greater than 3 half-lives. Data were fitted to a first order regression; plots, slopes, and R<sup>2</sup> values are reported below.

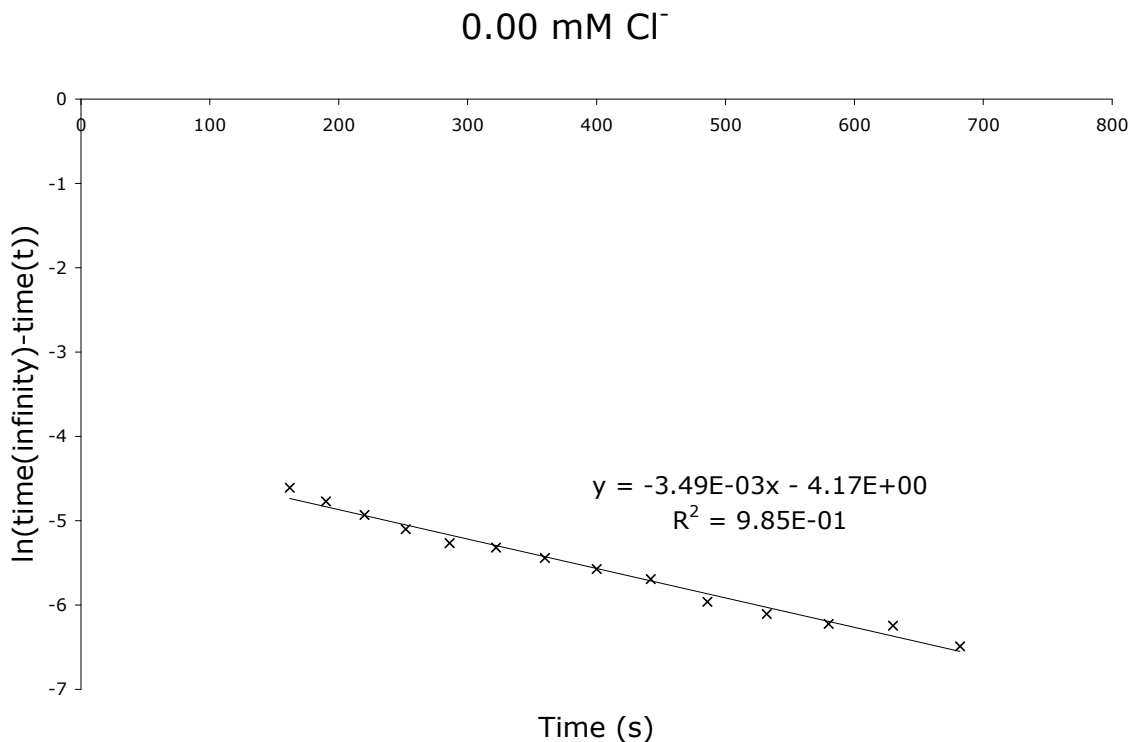

5.7 mM Cl<sup>-</sup>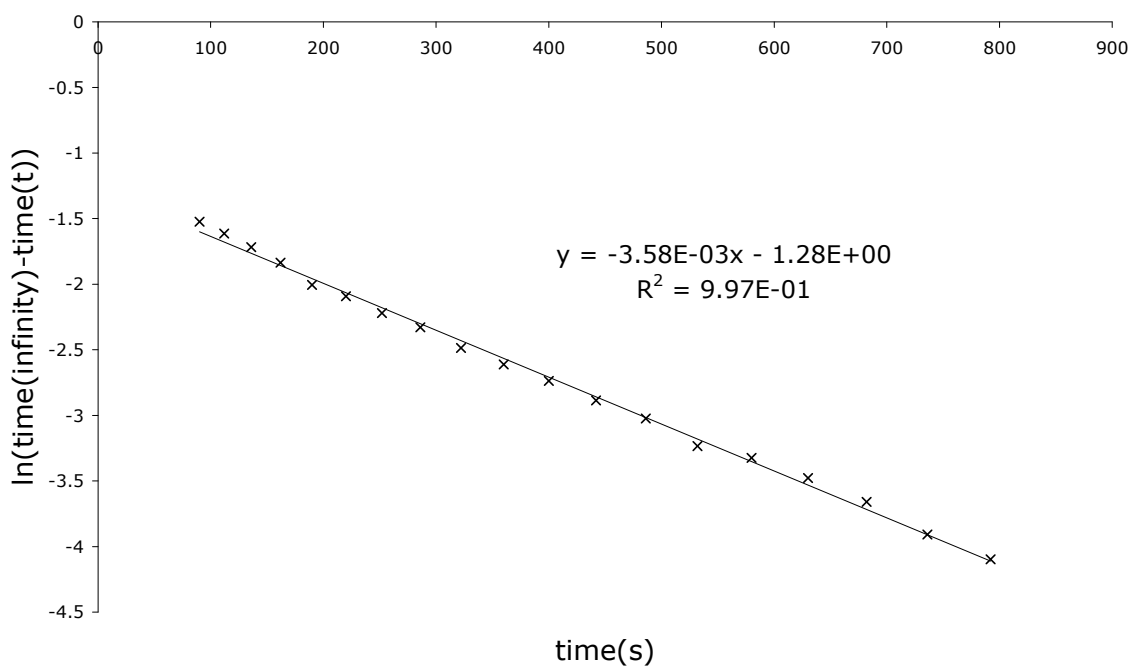8.6 mM Cl<sup>-</sup>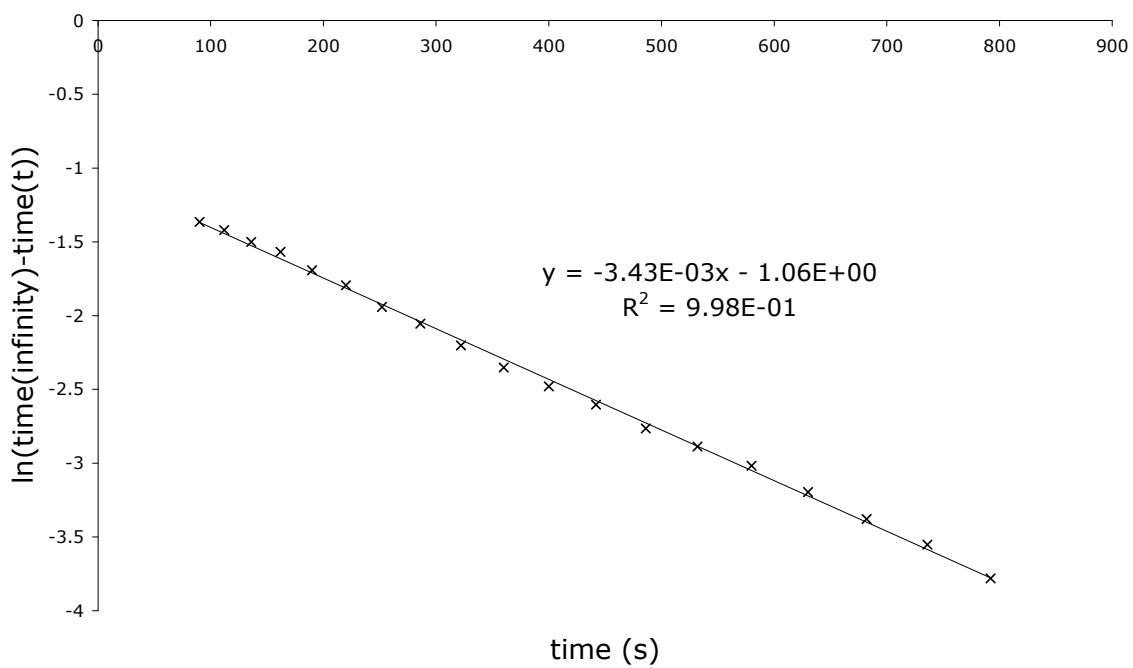

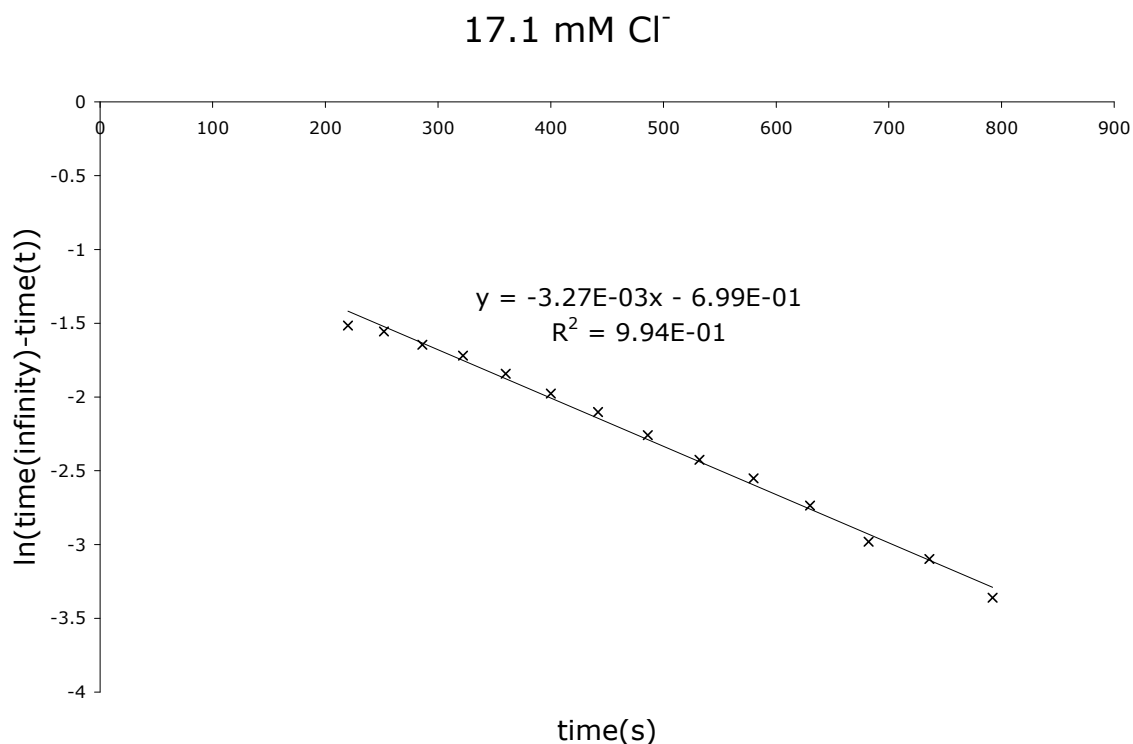

| <u>[Cl<sup>-</sup>] (mM)</u> | <u>k (s<sup>-1</sup>), R<sup>2</sup></u> |
|------------------------------|------------------------------------------|
| 0.0                          | 3.49 × 10 <sup>-3</sup> ; 0.985          |
| 5.7                          | 3.58 × 10 <sup>-3</sup> ; 0.997          |
| 8.6                          | 3.43 × 10 <sup>-3</sup> ; 0.998          |
| 17.1                         | 3.27 × 10 <sup>-3</sup> ; 0.994          |

#### Rate of C–Cl Reductive Elimination from **1** as a Function of [OAc<sup>-</sup>]

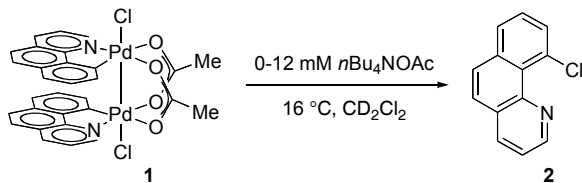

Stock solutions of compound **9** (29.9 mM) and *n*Bu<sub>4</sub>NOAc (82.8 mM) were prepared in CD<sub>2</sub>Cl<sub>2</sub>. In a nitrogen-filled dry box, compound **9** (350 μL) was diluted with *n* μL CD<sub>2</sub>Cl<sub>2</sub> in an NMR tube before (350 – *n*) μL *n*Bu<sub>4</sub>N<sub>4</sub>OAc was added to the NMR tube. PhICl<sub>2</sub> (2.8 mg, 1.0 equiv) was added to the NMR tube as a solid. <sup>1</sup>H NMR spectra were obtained; the evolution of **2** was monitored by the <sup>1</sup>H NMR signal at 9.12 ppm. These signals were integrated relative the residual proton signal from CD<sub>2</sub>Cl<sub>2</sub>. Since evolution



of product was measured, linear natural log plots were obtained by using an infinite time point set to 100% yield. In each case, the reactions were followed to greater than 3 half-lives. Data were fitted to a first order regression; plots, slopes, and  $R^2$  values are reported below.

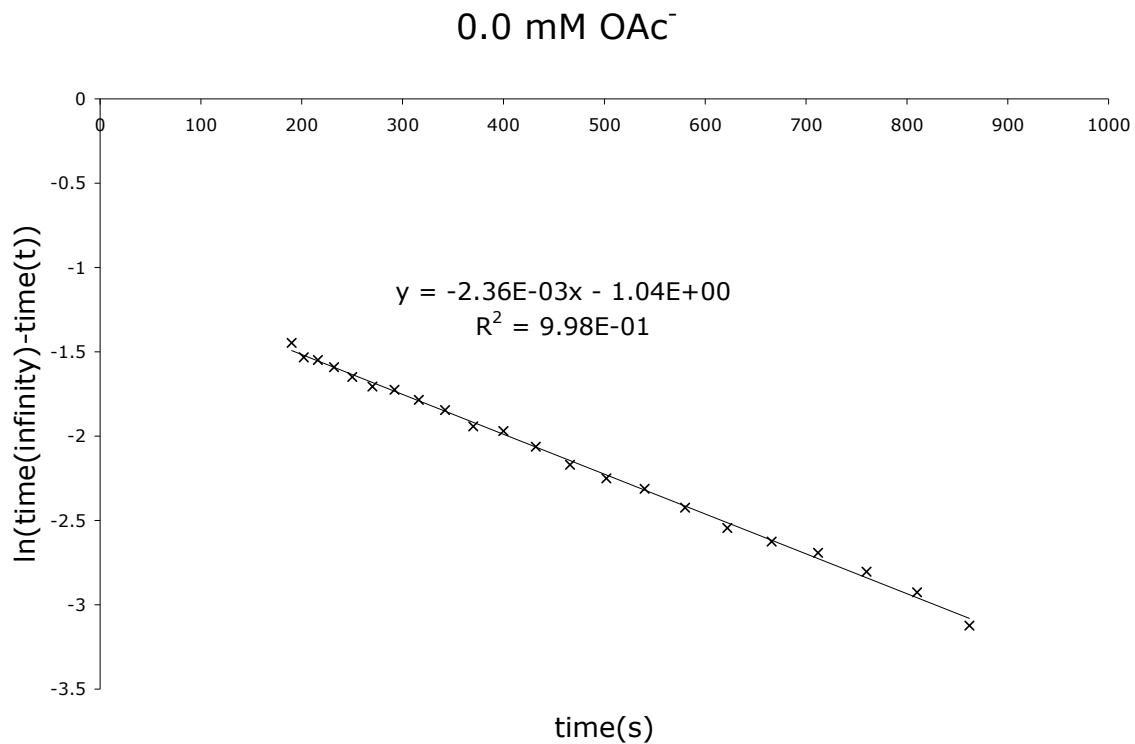

2.4 mM OAc<sup>-</sup>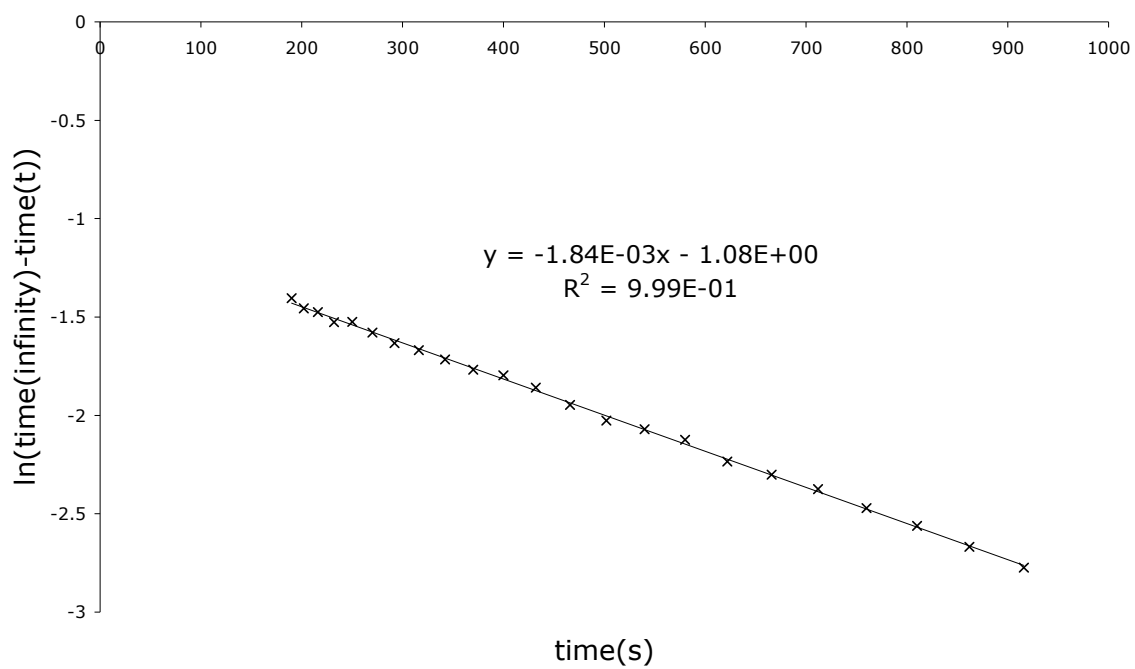4.1 mM OAc<sup>-</sup>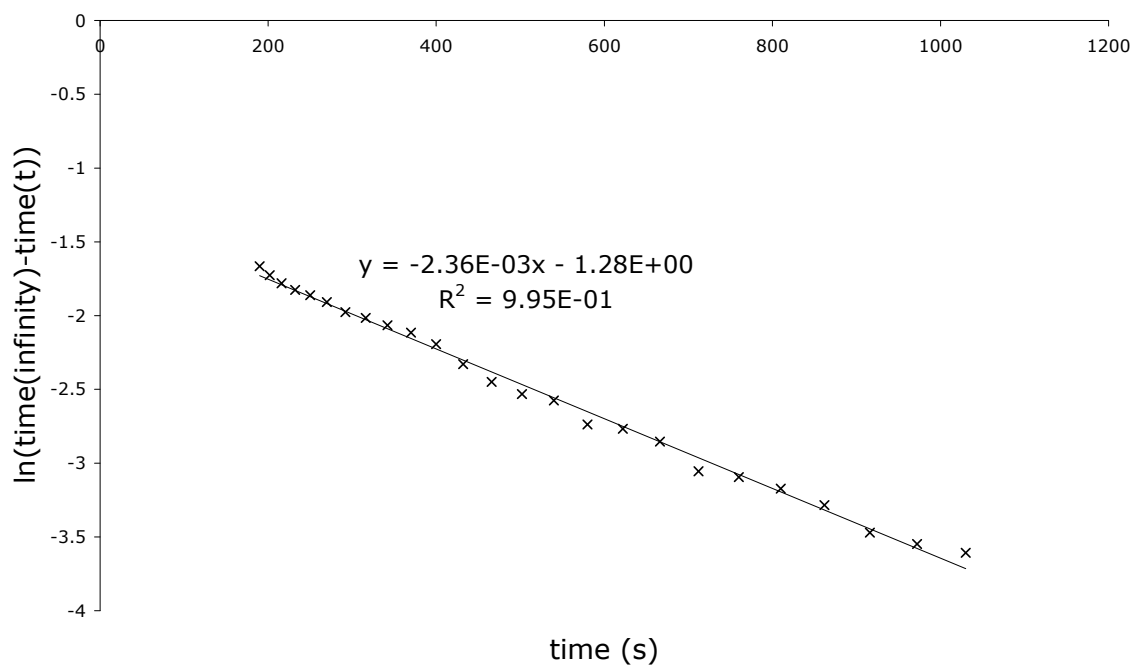

5.9 mM OAc<sup>-</sup>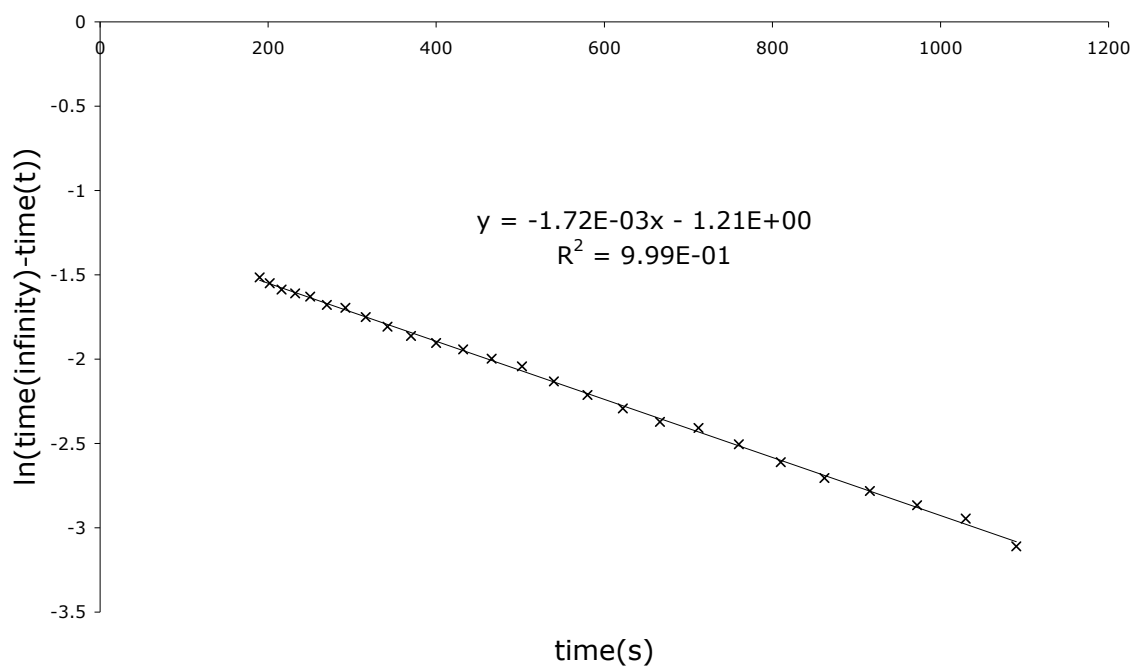11.8 mM OAc<sup>-</sup>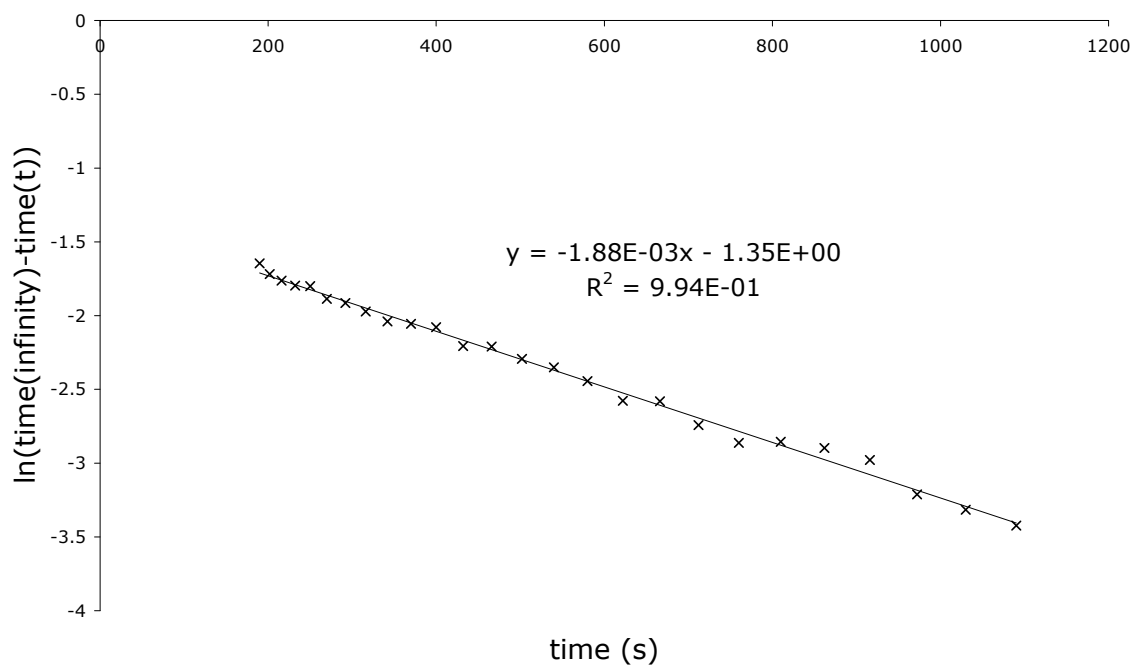

| <u>[OAc<sup>-</sup>] (mM)</u> | <u><math>k</math> (s<sup>-1</sup>), R<sup>2</sup></u> |
|-------------------------------|-------------------------------------------------------|
| 0.0                           | $2.36 \times 10^{-3}$ ; 0.998                         |
| 2.4                           | $1.84 \times 10^{-3}$ ; 0.999                         |
| 4.1                           | $2.36 \times 10^{-3}$ ; 0.995                         |
| 5.9                           | $1.72 \times 10^{-3}$ ; 0.999                         |
| 11.8                          | $1.88 \times 10^{-3}$ ; 0.994                         |

## Synthesis and Thermolysis of 10 (Data Pertaining to Scheme 1)

### [Pd(bhq)(OAc)<sub>2</sub>]<sub>2</sub> (10)

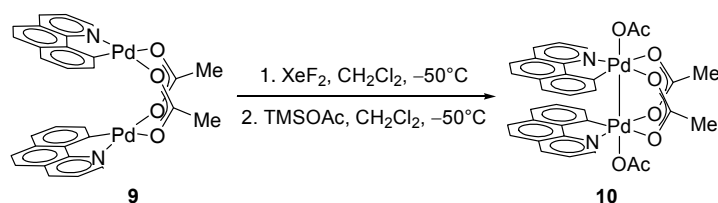

This reaction was carried out in a dry box. To a solution of benzo[*h*]quinolinylnyl palladium acetate dimer (**9**) (61.3 mg,  $8.92 \times 10^{-5}$  mol, 1.00 equiv) in CH<sub>2</sub>Cl<sub>2</sub> (2.0 mL) was added XeF<sub>2</sub> (15.1 mg,  $8.92 \times 10^{-5}$  mol, 1.00 equiv) at -50 °C. The reaction mixture immediately became dark red. After stirring for five minutes at -50 °C, TMSOAc (40.1 μL,  $2.68 \times 10^{-4}$  mol, 3.00 equiv) was added in one portion. After 15 minutes, solvent was removed *in vacuo* at -50 °C. The dark red residue was washed with pre-cooled (-50 °C) Et<sub>2</sub>O (2 × 3 mL) and dried at -50 °C to afford 63.9 mg of the title compound (89% yield) as a 15:1 mixture of isomers (benzo[*h*]quinolinylnyl ligand head to tail vs. head to head). The title compound is a moisture sensitive dark red solid.

<sup>1</sup>H-NMR (500 MHz, CD<sub>2</sub>Cl<sub>2</sub>, -30 °C, δ): Head to Tail Isomer: 7.89 (d, *J* = 5.4 Hz, 2H), 7.62 (d, *J* = 7.3 Hz, 2H), 7.47–7.41 (m, 4H), 7.31 (d, *J* = 8.8 Hz, 2H), 7.24 (d, *J* = 7.3 Hz, 2H), 7.12 (d, *J* = 8.8 Hz, 2H), 6.71 (dd, *J* = 7.8 Hz, 5.4 Hz, 2H), 2.71 (s, 6H), 1.47 (s, 6H). Head to Head Isomer: 8.26 (d, *J* = 5.2 Hz, 2H), 7.84 (d, 7.8 Hz, 2H), 6.88 (d, *J* = 7.3 Hz, 2H). <sup>13</sup>C-NMR (125 MHz, CD<sub>2</sub>Cl<sub>2</sub>, -30 °C, δ): Head to Tail Isomer: 187.41, 175.91, 157.38, 150.57, 149.85, 136.82, 136.69, 133.38, 130.36, 127.38, 126.28, 125.60, 124.76, 124.53, 121.20, 25.05, 23.00. X-ray data included in X-Ray Data Analysis Section. Thermal instability prevented either mass spectral or elemental analysis from being obtained.

**Benzo[*h*]quinolin-10-ol (S1)**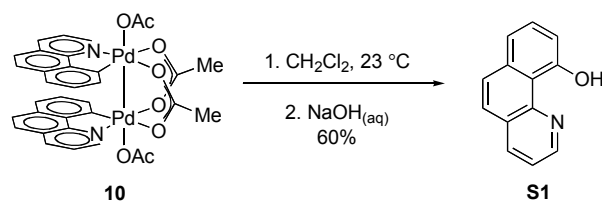

All manipulations involving [Pd(bhq)(OAc)<sub>2</sub>]<sub>2</sub> (**10**) were carried out in a dry box. A solution of [Pd(bhq)(OAc)<sub>2</sub>]<sub>2</sub> (**10**) (133 mg, 0.0138 mmol, 1.00 equiv) in CH<sub>2</sub>Cl<sub>2</sub> (3.0 mL) was stirred at 23 °C for four hours. Solvent was removed *in vacuo*. The residue was dissolved in MeOH (5.0 mL) and NaOH (27.5 mg, 0.0689 mmol, 5.00 equiv) was added. The solution was stirred for three hours before concentrated HCl(aq) was added until pH 7. Solvent was removed *in vacuo*. The residue was dissolved in EtOAc (8 mL) and washed with H<sub>2</sub>O (2 × 5 mL). The phases were separated and the organic phase was concentrated. The residue was purified by chromatography on silica gel eluting with hexanes/benzene (1:1) to afford 16.1 mg of the title compound (60% yield) as a pale yellow solid.

$R_f = 0.25$  (benzene/hexanes 1:1 (v/v)). <sup>1</sup>H-NMR (600 MHz, CDCl<sub>3</sub>, 23 °C, δ): 8.85 (dd,  $J = 4.7$  Hz,  $J = 1.8$  Hz, 1H), 8.27 (dd,  $J = 8.1$  Hz,  $J = 1.8$  Hz, 1H), 7.82 (d,  $J = 8.9$  Hz, 1H), 7.66–7.62 (m, 2H), 7.58 (dd,  $J = 7.9$  Hz,  $J = 4.5$  Hz, 1H), 7.43 (dd,  $J = 7.9$  Hz,  $J = 0.7$  Hz, 1H), 7.25 (dd,  $J = 8.6$  Hz,  $J = 1.2$  Hz, 1H), –1.08 (s, 1H). <sup>13</sup>C-NMR (125 MHz, CDCl<sub>3</sub>, 23 °C, δ): 159.44, 148.42, 145.04, 136.19, 135.05, 129.89, 129.15, 126.28, 124.54, 120.80, 118.07, 115.96, 113.96. Mass Spectrometry: HRMS-FIA ( $m/z$ ): calcd for [C<sub>13</sub>H<sub>9</sub>NO+H], 196.0760. Found, 196.0761. These spectroscopic data correspond to those reported in the literature<sup>3</sup> and are identical with those of an authentic sample prepared as described below.

**Benzo[*h*]quinolinyl palladium acetate dimer-*d6* (9-*d6*)**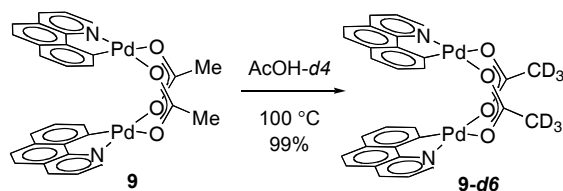

A solution of benzo[*h*]quinolinyl palladium acetate dimer (**9**) (198 mg, 0.288 mmol, 1.00 equiv) in acetic acid-*d4* (5.0 mL) was heated to 100 °C for 3 hours at which time the suspension was cooled to room temperature and solvent was removed *in vacuo*. The solid residue was dissolved in CHCl<sub>3</sub> and filtered through celite. The filtrate was concentrated *in vacuo*. The residue was triturated with Et<sub>2</sub>O to afford 199 mg of the title compound as a yellow solid (99% yield).

<sup>1</sup>H-NMR (500 MHz, CDCl<sub>3</sub>, 23 °C, δ): 7.82 (dd,  $J = 5.4$  Hz,  $J = 1.0$  Hz, 2H), 7.44 (dd,  $J = 8.3$  Hz,  $J = 1.5$  Hz, 2H), 7.25–7.20 (m, 6H), 7.08 (dd,  $J = 7.3$  Hz,  $J = 1.5$  Hz, 2H), 6.99 (d,  $J = 8.8$  Hz, 2H), 6.48 (dd,  $J = 8.3$  Hz,  $J = 5.4$  Hz, 2H). <sup>13</sup>C-NMR (125 MHz, CDCl<sub>3</sub>, 23 °C, δ): 152.99, 148.65, 148.56, 139.80, 135.02, 132.21, 128.77, 127.63, 127.46, 124.74, 122.64, 121.82, 119.55. These spectroscopic data correspond to

those reported above for compound **9** without the resonance for the bridging acetate ligands at 2.38 ppm.

### [Pd(bhq)(OAc)(O<sub>2</sub>CCD<sub>3</sub>)<sub>2</sub>] (10-*d6*)

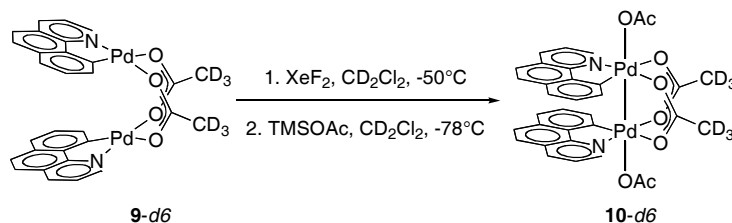

This reaction was carried out in a dry box. To a solution of benzo[*h*]quinolinyll palladium acetate-*d6* dimer (**9-*d6***) (39.7 mg,  $5.73 \times 10^{-5}$  mol, 1.00 equiv) in  $\text{CD}_2\text{Cl}_2$  (1.0 mL) was added  $\text{XeF}_2$  (9.7 mg,  $5.7 \times 10^{-5}$  mol, 1.0 equiv) at  $-50^\circ\text{C}$ . The reaction mixture immediately became dark red. The reaction solution was transferred to an NMR tube and cooled to  $-78^\circ\text{C}$ . TMSOAc (17.2  $\mu\text{L}$ ,  $1.15 \times 10^{-4}$  mol, 2.00 equiv) was added in one portion. The  $^1\text{H}$  NMR was observed at  $-60^\circ\text{C}$ . Upon warming to  $-30^\circ\text{C}$ , exchange between the bridging and apical acetate groups was observed. See “Ligand Exchange” section for details of this process.

$^1\text{H}$ -NMR (500 MHz,  $\text{CD}_2\text{Cl}_2$ ,  $-60^\circ\text{C}$ ,  $\delta$ ): 7.86 (d,  $J = 5.4$  Hz, 2H), 7.61 (d,  $J = 7.8$  Hz, 2H), 7.47–7.42 (m, 4H), 7.31 (d,  $J = 8.8$  Hz, 2H), 7.23 (d,  $J = 7.3$  Hz, 2H), 7.12 (d,  $J = 8.3$  Hz, 2H), 6.68 (dd,  $J = 7.8$  Hz,  $J = 5.9$  Hz, 2H), 1.48 (s, 6H). These spectroscopic data correspond to those reported for compound **10** above except for the absence of the resonance at 2.71 ppm.

## Ligand Exchange

### Exchange with Exogenous Acetate

Thermolysis of 10-*d6*

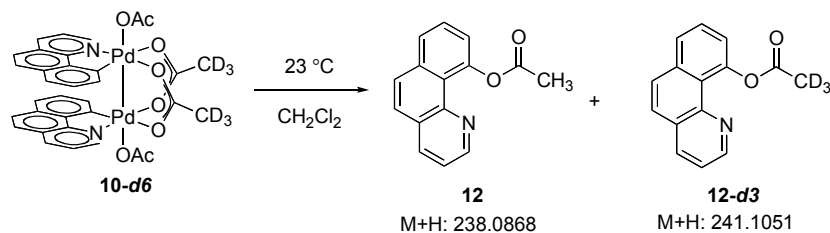

A solution of **10-*d6*** (46.6 mg,  $5.73 \times 10^{-5}$  mol, 1.00 equiv) in  $\text{CH}_2\text{Cl}_2$  (2.20 mL) at  $-50^\circ\text{C}$  was warmed to  $23^\circ\text{C}$ . The solution was stirred for three hours at  $23^\circ\text{C}$  at which time, the crude reaction mixture was analyzed by mass spectrometry. The ratio of **12** (238.0868 amu) to **12-*d3*** (241.1051 amu) was determined to be 1.02 based on the area under the peaks corresponding to the respective products.

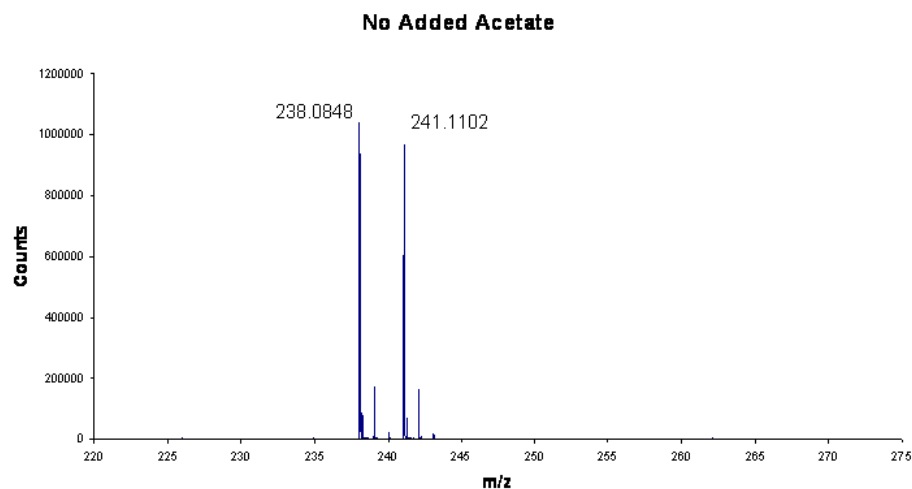

#### Thermolysis of **10-d6** in the Presence of Exogenous Acetate

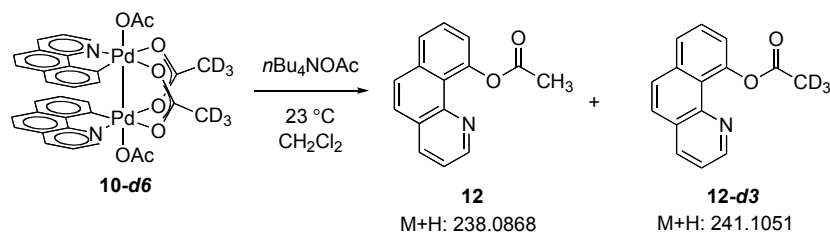

To a solution of **10-d6** (29.3 mg,  $3.60 \times 10^{-5}$  mol, 1.00 equiv) in  $\text{CH}_2\text{Cl}_2$  (1.20 mL) at  $-50\text{ }^\circ\text{C}$  was added  $n\text{-Bu}_4\text{N}\cdot\text{OAc}$  (21.8 mg,  $7.20 \times 10^{-5}$  mol, 2.00 equiv) and the solution was warmed to  $23\text{ }^\circ\text{C}$ . The solution was stirred for three hours at  $23\text{ }^\circ\text{C}$ . The solution was passed through a plug of  $\text{SiO}_2$  to remove tetrabutylammonium acetate residue, after which time, the crude reaction mixture was analyzed by mass spectrometry. The ratio of **12** (238.0868 amu) to **12-d3** (241.1051 amu) was determined to be 2.38 based on the area under the peaks corresponding to the respective products.

## Exogenous Proteo Acetate Added

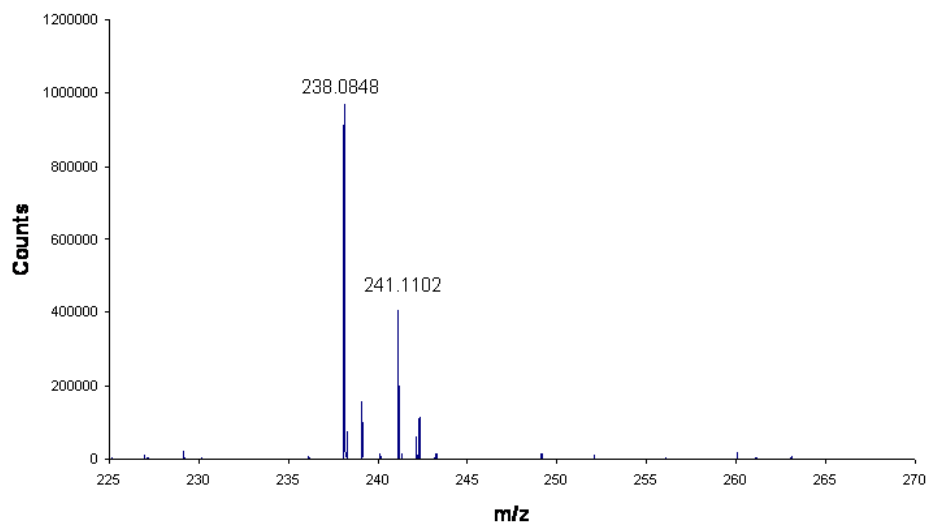

|                  | <u>12</u>          | <u>12-d3</u>       | <u>12:12-d3</u> |
|------------------|--------------------|--------------------|-----------------|
| No Added Acetate | $2.65 \times 10^6$ | $2.60 \times 10^6$ | 1.02            |
| Added Acetate    | $3.12 \times 10^6$ | $1.31 \times 10^6$ | 2.38            |

## Exchange in the Absence of Exogenous Acetate

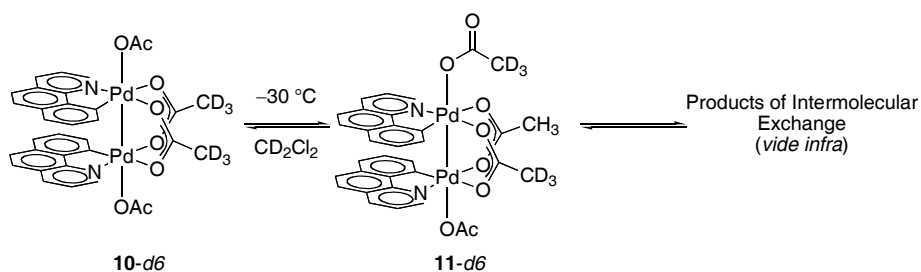

This reaction was carried out in a dry box. To a solution of **9-d6** (39.7 mg,  $5.73 \times 10^{-5}$  mol, 1.00 equiv) in  $\text{CD}_2\text{Cl}_2$  (1.0 mL) was added  $\text{XeF}_2$  (9.7 mg,  $5.7 \times 10^{-5}$  mol, 1.0 equiv) at  $-50\text{ }^\circ\text{C}$ . The reaction mixture immediately becomes dark red. The reaction solution was transferred to an NMR tube and cooled to  $-78\text{ }^\circ\text{C}$ . TMSOAc (17.2  $\mu\text{L}$ ,  $1.15 \times 10^{-4}$  mol, 2.00 equiv) was added in one portion. Upon warming to  $-30\text{ }^\circ\text{C}$ , exchange between the bridging and apical acetate groups was observed.  $^1\text{H}$  NMR spectra were obtained; the exchange of the acetate ligands could be followed by the relative integration of the signals at 1.48 and 2.71 ppm. These signals were integrated relative the residual proton signal from  $\text{CD}_2\text{Cl}_2$ .



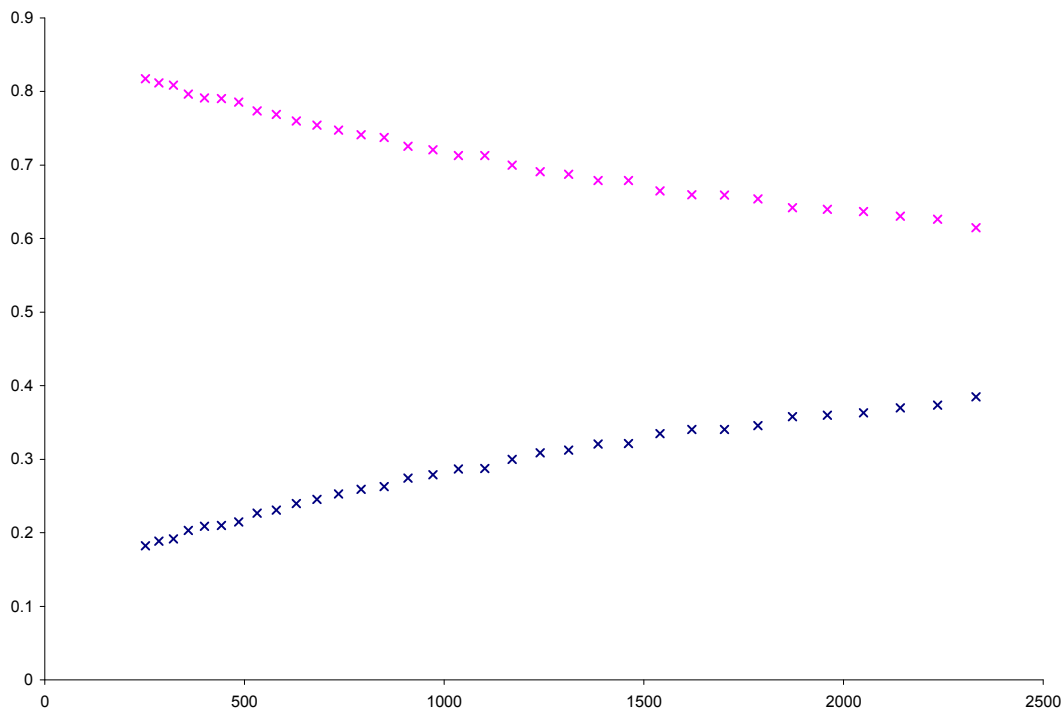

Using the software package SigmaPlot10.0, nonlinear regression analysis was carried out. The decay of excess proteo-acetate in the apical position was fitted with the following function:

$$y = y_0 + ae^{-bx} - c(1 - e^{-bx}).$$

The following values were determined to fit the experimental data most closely:

$$y_0 = 0.6408$$

$$a = 0.2209$$

$$b = 0.00058$$

$$c = 0.1068$$

The regression analysis is appended below:

Nonlinear Regression

Data Source: Data 1 in isomerization

Equation: User-Defined, ModifiedDouble, 5 Parameter

$$f = y_0 + a \cdot \exp(-b \cdot x) - c \cdot (1 - \exp(-b \cdot x))$$

| R      | Rsqr        | Adj Rsqr    | Standard Error of Estimate |         |              |
|--------|-------------|-------------|----------------------------|---------|--------------|
| 0.9992 | 0.9983      | 0.9981      | 0.0027                     |         |              |
|        | Coefficient | Std. Error  | t                          | P       | VIF          |
| y0     | 0.6408      | 15342.6826  | 4.1763E-005                | 1.0000  | 1.0928E+015< |
| a      | 0.2209      | 15342.6824  | 1.4396E-005                | 1.0000  | 3.7446E+014< |
| b      | 0.0006      | 2.9641E-005 | 19.4690                    | <0.0001 | 122.0754<    |
| c      | 0.1068      | 15342.6823  | 6.9641E-006                | 1.0000  | 2.5407E+014< |

Analysis of Variance:

Uncorrected for the mean of the observations:

|            | DF | SS      | MS     |
|------------|----|---------|--------|
| Regression | 4  | 17.0313 | 4.2578 |

Residual29 0.0002 7.1086E-006

Total 33 17.0315 0.5161

Corrected for the mean of the observations:

|            | DF | SS     | MS     | F         | P       |
|------------|----|--------|--------|-----------|---------|
| Regression | 3  | 0.1224 | 0.0408 | 5741.2248 | <0.0001 |

Residual29 0.0002 7.1086E-006

Total 32 0.1226 0.0038

Statistical Tests:

PRESS 0.0003

Durbin-Watson Statistic 2.3132 Passed

Normality Test Passed (P = 0.6141)

K-S Statistic = 0.1288 Significance Level = 0.6141

Constant Variance Test Passed (P = 0.1289)

Power of performed test with alpha = 0.0500: 1.0000

The evolution of proteo-acetate in the bridging position was fitted with the following function:

$$y = y_0 + ae^{-bx} - c(1 - e^{-bx}).$$

The following values were determined to fit the experimental data most closely:

$$y_0 = 0.3592$$

$$a = -0.2209$$

$$b = 0.00058$$

$$c = -0.1068$$

The regression analysis is appended below:

Nonlinear Regression

Data Source: Data 1 in isomerization good

Equation: User-Defined, ModifiedDouble, 5 Parameter

$$\hat{f} = y_0 + a * \exp(-b * x) - c * (1 - \exp(-b * x))$$

| R | Rsqr | Adj Rsqr | Standard Error of Estimate |
|---|------|----------|----------------------------|
|---|------|----------|----------------------------|

|        |        |        |        |
|--------|--------|--------|--------|
| 0.9992 | 0.9983 | 0.9981 | 0.0027 |
|--------|--------|--------|--------|

|    | Coefficient | Std. Error  | t            | P       | VIF          |
|----|-------------|-------------|--------------|---------|--------------|
| y0 | 0.3592      | 26973.9434  | 1.3318E-005  | 1.0000  | 3.3777E+015< |
| a  | -0.2209     | 26973.9428  | -8.1883E-006 | 1.0000  | 1.1574E+015< |
| b  | 0.0006      | 3.0438E-005 | 18.9589      | <0.0001 | 128.7321<    |
| c  | -0.1068     | 26973.9412  | -3.9612E-006 | 1.0000  | 7.8529E+014< |

Analysis of Variance:

Uncorrected for the mean of the observations:

|            | DF | SS     | MS     |
|------------|----|--------|--------|
| Regression | 4  | 2.7876 | 0.6969 |

Residual29 0.0002 7.1086E-006

Total 33 2.7878 0.0845

Corrected for the mean of the observations:

|            | DF | SS     | MS     | F         | P       |
|------------|----|--------|--------|-----------|---------|
| Regression | 3  | 0.1224 | 0.0408 | 5741.2248 | <0.0001 |

Residual29 0.0002 7.1086E-006

Total 32 0.1226 0.0038

Statistical Tests:

PRESS 0.0003

Durbin-Watson Statistic 2.3132 Passed

Normality Test Passed (P = 0.6141)

K-S Statistic = 0.1288 Significance Level = 0.6141

Constant Variance Test Passed (P = 0.1289)

Power of performed test with alpha = 0.0500: 1.0000

### Comparison of Acetate Scrambling Rate with Rate of C–Cl Reductive Elimination

The rate of acetate scrambling was observed at  $-30\text{ }^{\circ}\text{C}$  and was determined to be  $5.8 \times 10^{-4}\text{ s}^{-1}$ .

The rate of C–Cl reductive elimination was extrapolated from the Arrhenius equation generated for this reaction:

$$\ln(k/T) = -8.65 \times 10^3(1/T) + 18.1.$$

At  $-30\text{ }^{\circ}\text{C}$ , the calculated rate of C–Cl reductive elimination is  $6.14 \times 10^{-6}\text{ s}^{-1}$ .

Based on these calculations, acetate scrambling between **10-d6** and **11-d6** is 94 times faster than is C–Cl reductive elimination from **1**.

### Observation of Intermolecular Ligand Exchange

#### Trimethylsilylpropionate (**S2**)

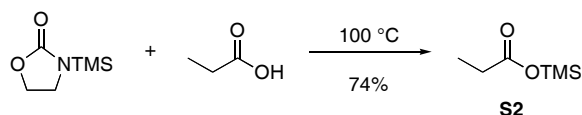

Under  $\text{N}_2$ , 3-(trimethylsilyl)oxazolidin-2-one (6.50 mL, 6.79 g, 42.7 mmol, 1.00 equiv) and propionic acid (3.75 mL, 3.71 g, 50.1 mmol, 1.17 equiv) were combined and heated to  $100\text{ }^{\circ}\text{C}$ . After 30 minutes at  $100\text{ }^{\circ}\text{C}$ , the reaction was cooled to room temperature at which time a white precipitate was observed. The title compound was obtained as a colorless oil by distillation under  $\text{N}_2$  at  $120\text{ }^{\circ}\text{C}$ . **S2** prepared in this manner was contaminated by  $\sim 2\%$  propionic acid (determined by  $^1\text{H}$  NMR spectroscopy).

$^1\text{H}$ -NMR (500 MHz,  $\text{CD}_2\text{Cl}_2$ ,  $23\text{ }^{\circ}\text{C}$ ,  $\delta$ ): 2.29, (q,  $J = 7.3\text{ Hz}$ , 2H), 1.06 (t,  $J = 7.3\text{ Hz}$ , 3H), 0.26 (s, 12H).

$^{13}\text{C}$ -NMR (125 MHz,  $\text{CDCl}_3$ ,  $23\text{ }^{\circ}\text{C}$ ,  $\delta$ ): 175.18, 29.42, 9.30,  $-0.25$ . These spectroscopic data correspond to those reported in the literature.<sup>4</sup>

#### Benzo[*h*]quinolinyll palladium propionate dimer (**S3**)

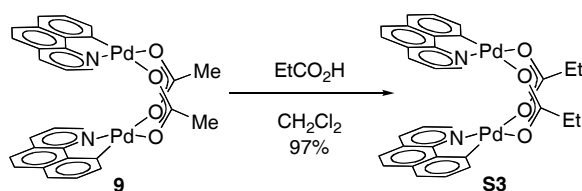

To a solution of benzo[*h*]quinolinyll palladium acetate dimer (**9**) (550 mg, 0.800 mmol, 1.00 equiv) in CH<sub>2</sub>Cl<sub>2</sub> (10 mL) at 23 °C was added propionic acid (1.00 mL, 0.990 g, 13.4 mmol, 16.7 equiv) and the reaction solution was stirred at 23 °C for 15 minutes. Saturated NaHCO<sub>3(aq)</sub> (10 mL) was added and the layers were separated. The organic layer was washed with sat. NaHCO<sub>3(aq)</sub> (2 × 10 mL) and brine (1 × 10 mL). The organic layer was dried with Na<sub>2</sub>SO<sub>4</sub> before solvent was removed in vacuo to afford 572 mg of the title complex as a yellow solid (97 % yield) in a 17:1 ratio of isomers (benzo[*h*]quinolinyll ligands head to tail vs. head to head).

<sup>1</sup>H-NMR (500 MHz, CD<sub>2</sub>Cl<sub>2</sub>, 23 °C, δ): Major Isomer : 7.77 (dd, *J* = 5.4 Hz, *J* = 1.5 Hz, 2H), 7.49 (dd, *J* = 7.8 Hz, *J* = 1.0 Hz, 2H), 7.27–7.24 (m, 4H), 7.18 (dd, *J* = 7.3 Hz, *J* = 7.3 Hz, 2H), 7.03–6.99 (m, 4H), 6.52 (dd, *J* = 8.3 Hz, *J* = 5.4 Hz, 2H), 2.59 (q, *J* = 7.3 Hz, 4H), 1.32 (t, *J* = 7.3 Hz, 6H). Minor Isomer: 8.07 (dd, *J* = 4.9 Hz, *J* = 1.0 Hz, 2H), 7.06 (d, *J* = 8.3 Hz, 4H), 6.95 (dd, *J* = 7.8 Hz, *J* = 4.9 Hz, 2H), 6.88–6.86 (m, 4H), 6.72 (d, *J* = 7.3 Hz, 2H). <sup>13</sup>C-NMR (125 MHz, CD<sub>2</sub>Cl<sub>2</sub>, 23 °C, δ): Major Isomer: 185.38, 153.24, 148.90, 140.06, 135.68, 132.60, 128.80, 127.93, 127.79, 125.19, 123.19, 122.25, 120.18, 31.81, 11.19.

#### Benzo[*h*]quinolinyll propionate palladium(III) propionate dimer (**S4**)

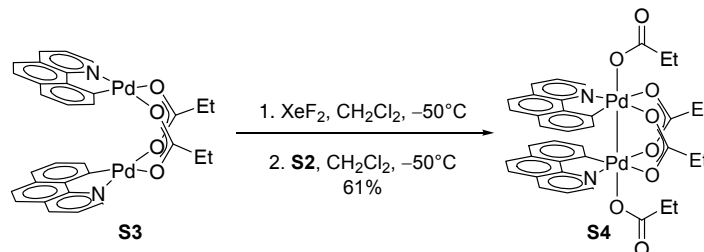

This reaction was carried out in a dry box. To a solution of benzo[*h*]quinolinyll propionate dimer (**S3**) (85.5 mg, 0.120 mmol, 1.00 equiv) in CH<sub>2</sub>Cl<sub>2</sub> (2.0mL) was added XeF<sub>2</sub> (20.2 mg, 0.120 mmol, 1.00 equiv) at -50 °C. The reaction mixture immediately became dark red. After stirring for 15 minutes at -50 °C, trimethylsilylpropionate (**S2**) (36.0 mg, 0.246 mmol, 2.05 equiv) was added in one portion. The resulting solution was layered with pentane. After 24 hours, 63.0 mg of the title complex (61%) was obtained as a dark red crystalline solid by decanting the solvent followed by drying in vacuo. The title compound was isolated as a single isomer and is a moisture and temperature sensitive dark red solid.

<sup>1</sup>H-NMR (500 MHz, CD<sub>2</sub>Cl<sub>2</sub>, -20 °C, δ): Head to Tail Isomer: 7.89 (dd, *J* = 5.9 Hz, *J* = 1.0 Hz, 2H), 7.66 (dd, *J* = 6.8 Hz, *J* = 1.0 Hz, 2H), 7.43–7.40 (m, 4H), 7.32 (d, *J* = 8.8 Hz, 2H), 7.18 (dd, *J* = 5.4 Hz, *J* = 3.4 Hz, 2H), 7.15 (d, *J* = 8.8 Hz, 2H), 6.75 (dd, *J* = 8.3 Hz, *J* = 5.9 Hz, 2H), 2.98–2.93 (m, 4H), 1.90–1.86 (m, 2H), 1.79–1.73 (m, 2H), 1.50 (t, *J* = 7.8 Hz, 6H), 0.47 (t, *J* = 7.8 Hz, 6H).

**Ligand exchange between **10** and **S4****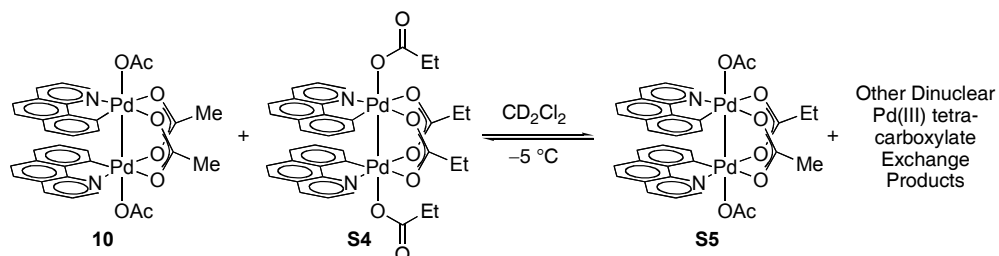

This reaction was carried out in a dry box. To a solution of benzo[*h*]quinolinyll propionate palladium(III) propionate dimer (**S4**) (9.0 mg, 0.010 mmol, 1.0 equiv) in CD<sub>2</sub>Cl<sub>2</sub> (0.5 mL) was a solution of benzo[*h*]quinolinyll acetate palladium(III) acetate dimer (**10**) (8.4 mg, 0.010 mmol, 1.0 equiv) in CD<sub>2</sub>Cl<sub>2</sub> (0.5 mL) at -50 °C. A <sup>1</sup>H NMR spectrum obtained at -50 °C showed complexes **10** and **S4**. The reaction mixture was warmed to -5 °C in the NMR spectrometer, at which temperature a signal at 2.69 ppm was observed to increase in intensity as a function of time. This peak was assigned as a new complex with one bridging acetate and one bridging propionate ligand (for example **S5**). The relevant <sup>1</sup>H NMR spectrum is reproduced below.

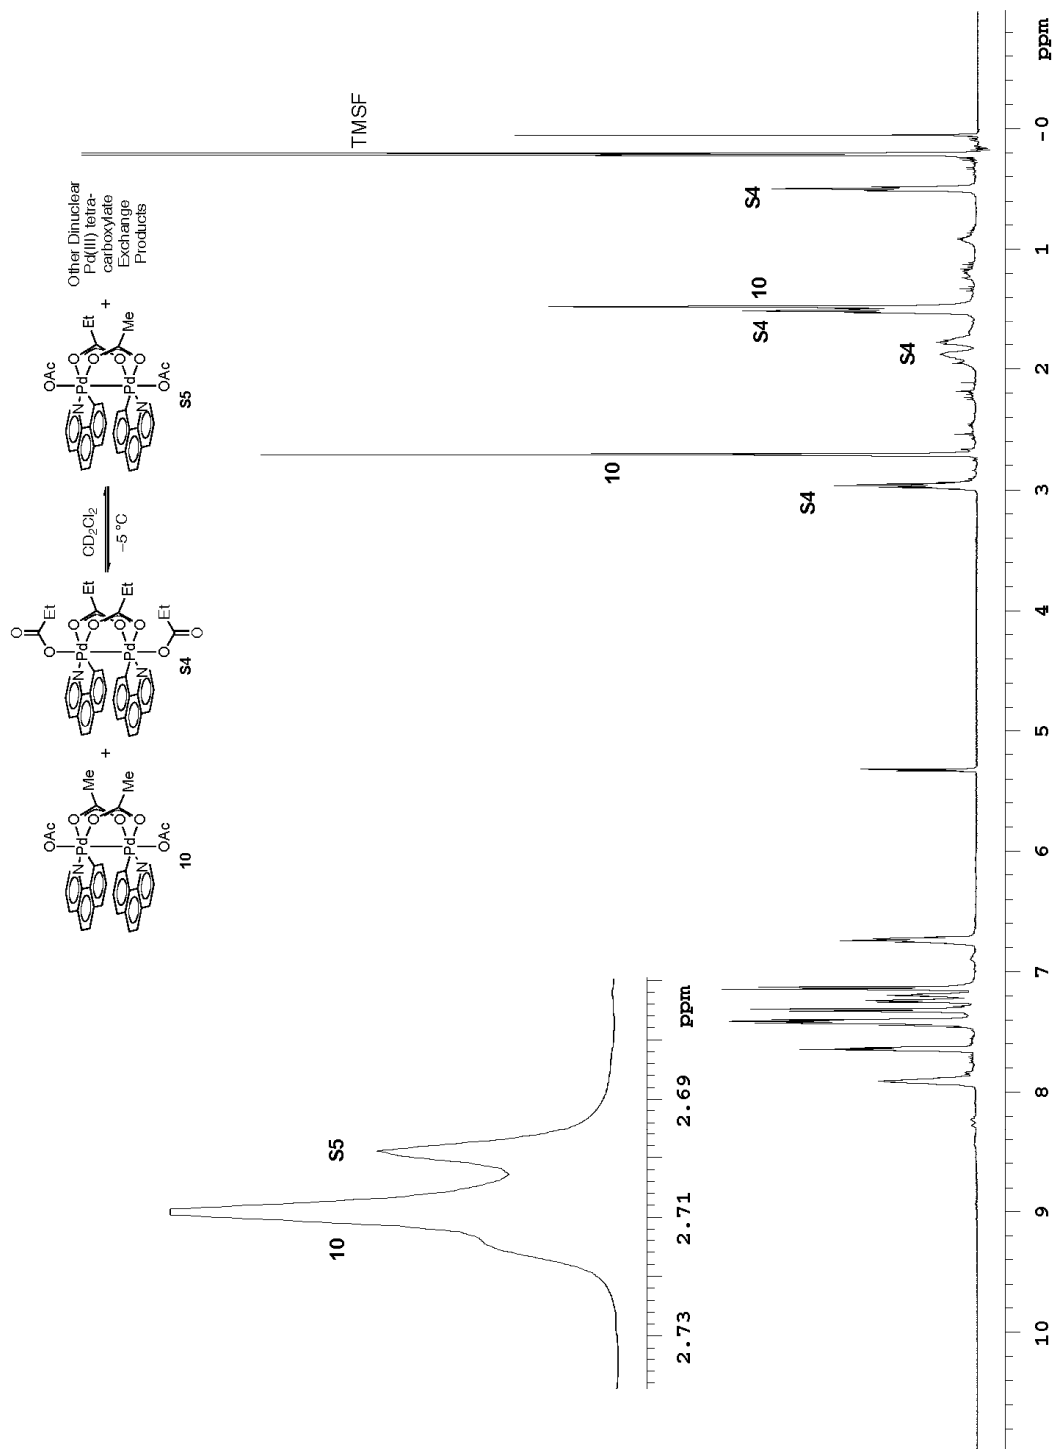

## Analysis of the Pd Containing Byproducts of Reductive Elimination (Data Pertaining to Scheme 2)

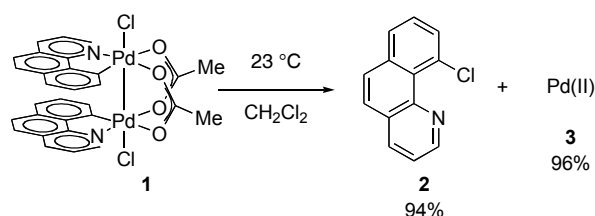

### Isolation of **3**

A solution of benzo[*h*]quinolanyl chloro palladium acetate dimer (**1**) (37.5 mg, 0.0495 mmol, 1.00 equiv) in CH<sub>2</sub>Cl<sub>2</sub> (3mL) was prepared at –50 °C. The solution was warmed to 23 °C. After stirring for three hours at 23 °C, the solution was yellow. Solvent was removed *in vacuo*. Trituration with Et<sub>2</sub>O to remove compound **2** and PhI afforded 25.9 mg of **3** as a yellow solid (96% yield based on empirical formula: [Pd<sub>2</sub>(bhq)(OAc)<sub>2</sub>Cl]).

The crude mixture **3**, prior to trituration has been analyzed by elemental analysis. Anal: calcd for [Pd<sub>2</sub>(bhq)(OAc)<sub>2</sub>Cl·Compound **2**·C<sub>6</sub>H<sub>5</sub>I]: C, 44.93; H, 2.83; N, 2.91; found: C, 44.63; H, 2.55; N, 3.40.

Single crystals of **3a** are obtained by layering the crude CH<sub>2</sub>Cl<sub>2</sub> solution of mixture **3** with pentane and manual separation of the crystals from non-crystalline solids (data included in X-ray Data Analysis Section). Compound **3a** was not isolated in bulk and thus was not characterized further; isolation of a single crystal was only used to assign the oxidation state of the palladium nuclei. We have not determined what fraction of mixture **3** is constituted by compound **3a**.

### Derivatization of Pd Containing Byproducts (**3**) with Pyridine

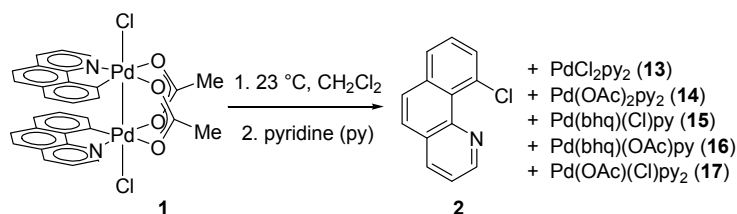

A solution of benzo[*h*]quinolanyl chloro palladium acetate dimer (**1**) (61.1 mg, 8.06 × 10<sup>-5</sup> mol, 1.00 equiv) in CH<sub>2</sub>Cl<sub>2</sub> (4.0 mL) was prepared at –50 °C and was allowed to warm to 23 °C. After stirring at 23 °C for 5 h, solvent was removed *in vacuo*. The crude residue was taken up in 3.0 mL CDCl<sub>3</sub> and pyridine (80 μL, 78.6 mg, 0.993 mmol, 12.3 equiv) was added resulting in the formation of a yellow solution. <sup>1</sup>H NMR analysis of this solution revealed the presence of six species, which have been assigned as 10-chlorobenzo[*h*]quinoline (**2**), PdCl<sub>2</sub>py<sub>2</sub> (**13**), Pd(OAc)<sub>2</sub>py<sub>2</sub> (**14**), Pd(bhq)(OAc)py (**15**), Pd(bhq)Clpy (**16**), and Pd(OAc)(Cl)py<sub>2</sub> (**17**). All species were assigned based on comparison with the <sup>1</sup>H NMR spectra of authentic samples (prepared below; <sup>1</sup>H NMR data for the crude reaction mixture following reductive elimination as well as following treatment with pyridine are reproduced below; <sup>1</sup>H NMR of the authentic

samples of **13**, **14**, **15**, **16**, and **17** are reproduced below for comparison). The combined yield of compounds **13**–**17** was determined to be 99% by comparison of the integration of the  $^1\text{H}$  NMR signal for **2** (9.12 ppm; 92% yield based on **1** as determined by isolation above) with the integrations of the  $^1\text{H}$  NMR signals of **13** (8.83 ppm), **14** and **17** (overlapping signal at 8.67 ppm), **15** (9.21 ppm), and **16** (9.06 ppm).

#### **Trans-dichloro bis(pyridine)palladium(II) (13)**

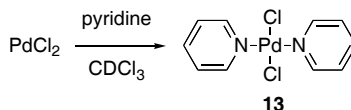

To a suspension of  $\text{PdCl}_2$  (20.9 mg, 0.118 mmol, 1.00 equiv) in  $\text{CDCl}_3$  (1.5 mL) at 23 °C was added pyridine (9.5  $\mu\text{L}$ , 9.3 mg, 0.12 mmol, 2.0 equiv). The title complex was observed by  $^1\text{H}$  NMR in the presence of pyridine and was not isolated.

$^1\text{H}$ -NMR (500 MHz,  $\text{CDCl}_3$ , 23 °C,  $\delta$ ): 8.83 (dd,  $J = 6.4$  Hz,  $J = 1.0$  Hz, 4H), 7.77 (tt,  $J = 6.4$  Hz,  $J = 1.2$  Hz, 2H), 7.33 (ddd,  $J = 6.6$  Hz,  $J = 5.1$  Hz,  $J = 1.5$  Hz, 4H). These spectroscopic data correspond to those reported in the literature.<sup>5</sup>

#### **Trans-diacetato bis(pyridine)palladium(II) (14)**

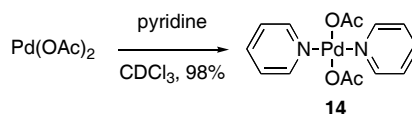

To a suspension of  $\text{Pd}(\text{OAc})_2$  (18.7 mg,  $8.33 \times 10^{-5}$  mol, 1.00 equiv) in  $\text{CDCl}_3$  (0.6 mL) at 23 °C was added pyridine (13.5  $\mu\text{L}$ , 13.2 mg, 0.167 mmol, 2.00 equiv) resulting in the formation of a pale yellow solution. Solvent was removed in vacuo to afford 31.2 mg of the title compound as a pale yellow solid (98% yield).

$^1\text{H}$ -NMR (500 MHz,  $\text{CDCl}_3$ , 23 °C,  $\delta$ ): Major Isomer : 8.67 (ddd,  $J = 6.0$  Hz,  $J = 1.2$  Hz,  $J = 1.2$  Hz, 4H), 7.76 (tt,  $J = 7.8$  Hz,  $J = 1.6$  Hz, 2H), 7.31 (ddd,  $J = 6.4$  Hz,  $J = 5.0$  Hz,  $J = 1.1$  Hz, 4H), 1.81 (s, 6H).  $^{13}\text{C}$ -NMR (125 MHz,  $\text{CDCl}_3$ , 23 °C,  $\delta$ ): 178.15, 151.59, 138.45, 124.75, 23.14. These spectroscopic data correspond to those reported in the literature.<sup>6</sup>

#### **Acetato benzo[*h*]quinoliny-(pyridyl)-palladium(II) (15)**

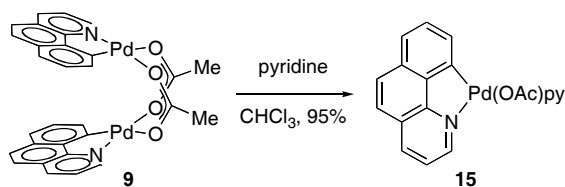



To a solution of benzo[*h*]quinolinyll palladium acetate dimer (**9**) (15.7 mg,  $2.28 \times 10^{-5}$  mol, 1.00 equiv) in  $\text{CHCl}_3$  (0.6 mL) at 23 °C was added pyridine (3.7  $\mu\text{L}$ , 3.6 mg,  $4.6 \times 10^{-5}$  mol, 2.0 equiv). Solvent was removed in vacuo to afford 18.5 mg of the title compound as a pale yellow solid (95% yield).

$^1\text{H-NMR}$  (500 MHz,  $\text{CDCl}_3$ , 23 °C,  $\delta$ ): 9.21 (ddd,  $J = 4.8$  Hz,  $J = 1.6$  Hz,  $J = 1.6$  Hz, 2H), 8.76 (dd,  $J = 5.3$  Hz,  $J = 1.4$  Hz, 1H), 8.28 (dd,  $J = 8.0$  Hz,  $J = 1.4$  Hz, 1H), 7.92 (tt,  $J = 7.8$  Hz,  $J = 1.6$  Hz, 1H), 7.74 (d,  $J = 8.7$  Hz, 1H), 7.60 (d,  $J = 8.7$  Hz, 1H), 7.56 (d,  $J = 7.8$  Hz, 1H), 7.52–7.50 (m, 3H), 7.29–7.28 (m, 1H), 6.47 (dd,  $J = 7.3$  Hz,  $J = 0.7$  Hz, 1H), 2.07 (s, 3H).  $^{13}\text{C-NMR}$  (125 MHz,  $\text{CDCl}_3$ , 23 °C,  $\delta$ ): 178.15, 155.06, 153.66, 150.65, 148.55, 141.75, 138.02, 137.17, 133.20, 130.44, 128.87, 128.35, 126.58, 125.31, 123.26, 122.67, 121.19, 25.00.

### Benzo[*h*]quinolinyll palladium(II) chloride dimer (**S6**)

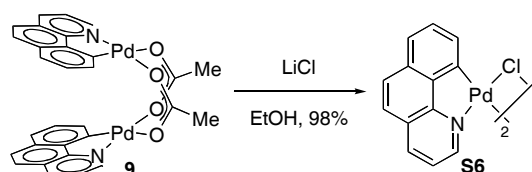

To a solution of benzo[*h*]quinolinyll palladium acetate dimer (**9**) (4.27 g, 12.4 mmol, 1.00 equiv) in EtOH (100 mL) at 0 °C was added lithium chloride (10.5 g, 24.8 mmol, 20.0 equiv). The reaction was warmed to 23 °C and stirred for 1.0 h. The precipitate was isolated by vacuum filtration and was washed with water (3  $\times$  100 mL), MeOH (2  $\times$  100 mL), and  $\text{Et}_2\text{O}$  (100 mL) to afford 3.89 g of the title compound<sup>7</sup> as a pale yellow solid (98% yield).

$^1\text{H-NMR}$  (500 MHz,  $\text{DMSO-}d_6$ , 23 °C,  $\delta$ ): 9.44 (d,  $J = 4.5$  Hz, 1H), 8.72 (br), 8.67 (d,  $J = 7.5$  Hz, 1H), 8.61 (br), 8.22 (d,  $J = 7.0$  Hz, 1H), 7.91 (d,  $J = 9.0$  Hz, 1H), 7.86–7.74 (m, 3H), 7.73 (br), 7.60 (br), 7.53 (dd,  $J = 7.5$  Hz,  $J = 7.0$ , 1H), 7.38 (br).  $^{13}\text{C-NMR}$  (125 MHz,  $\text{DMSO-}d_6$ , 23 °C,  $\delta$ ): 153.9, 152.2, 150.7, 150.6, 148.0, 141.7, 139.9, 134.4, 130.8, 129.6, 129.4, 127.5, 125.1, 124.4, 123.0, 122.9. Note: The  $^1\text{H}$  and  $^{13}\text{C}$  NMR spectra are more complicated than expected, probably due to a mixture of the title compound with a solvated adduct. The title compound is not soluble in non-coordinating solvents.

### Chloro benzo[*h*]quinolinyll-(pyridyl)-palladium(II) (**16**)

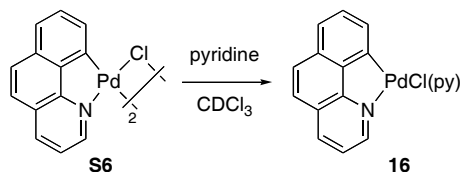

To a suspension of benzo[*h*]quinolinyll palladium chloride dimer (**S6**) (21.9 mg,  $3.42 \times 10^{-5}$  mol, 1.00 equiv) in  $\text{CDCl}_3$  (2.0 mL) at 23 °C was added pyridine (31.0  $\mu\text{L}$ , 30.4 mg,  $3.84 \times 10^{-4}$  mol, 11.3 equiv). The title complex<sup>8</sup> was observed by  $^1\text{H}$  NMR in the presence of pyridine and was not isolated; evaporation of solvent afforded mixtures of **16** with benzo[*h*]quinolinyll palladium chloride dimer **S6**.

$^1\text{H-NMR}$  (500 MHz,  $\text{CDCl}_3$ , 23 °C,  $\delta$ ): 9.58 (dd,  $J = 5.4$  Hz,  $J = 1.0$  Hz, 1H), 9.06 (d,  $J = 4.9$  Hz, 2H), 8.82 (dd,  $J = 6.3$  Hz,  $J = 1.5$  Hz, 2H), 8.27 (dd,  $J = 8.3$  Hz,  $J = 1.0$  Hz, 1H), 7.91 (dd,  $J = 7.8$  Hz,  $J = 7.8$  Hz, 1H), 7.60 (d,  $J = 8.3$  Hz, 1H), 7.57 (d,  $J = 7.8$  Hz, 1H), 7.52–7.47 (m, 3H), 6.42 (d,  $J = 7.3$  Hz, 1H).

***Trans*-chloro-acetato bis(pyridine)palladium(II) (17)**

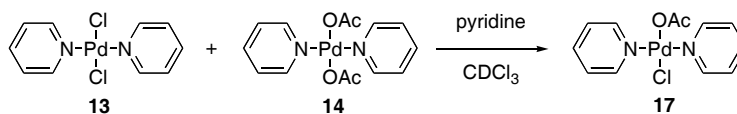

To a suspension of *trans*-dichloro bis(pyridine) palladium(II) (**13**) (29.6 mg,  $8.82 \times 10^{-5}$  mol, 1.00 equiv) in  $\text{CDCl}_3$  (2.0 mL) and pyridine (70  $\mu\text{L}$ ) was added *trans*-diacetato bis(pyridine) palladium(II) (**14**) (33.8 mg,  $8.82 \times 10^{-5}$  mol, 1.00 equiv) in  $\text{CDCl}_3$  (2.0 mL) and pyridine (70  $\mu\text{L}$ ) at 23 °C. The title complex was observed by  $^1\text{H NMR}$  in a mixture which also included **13** and **14**.

$^1\text{H-NMR}$  (500 MHz,  $\text{CDCl}_3$ , 23 °C,  $\delta$ ): 1.82 (s, 3H). Other  $^1\text{H NMR}$  signals were not differentiable from those of **13** and **14**.

$^1\text{H}$  NMR Data for Assignment of Palladium Containing Byproducts of Reductive Elimination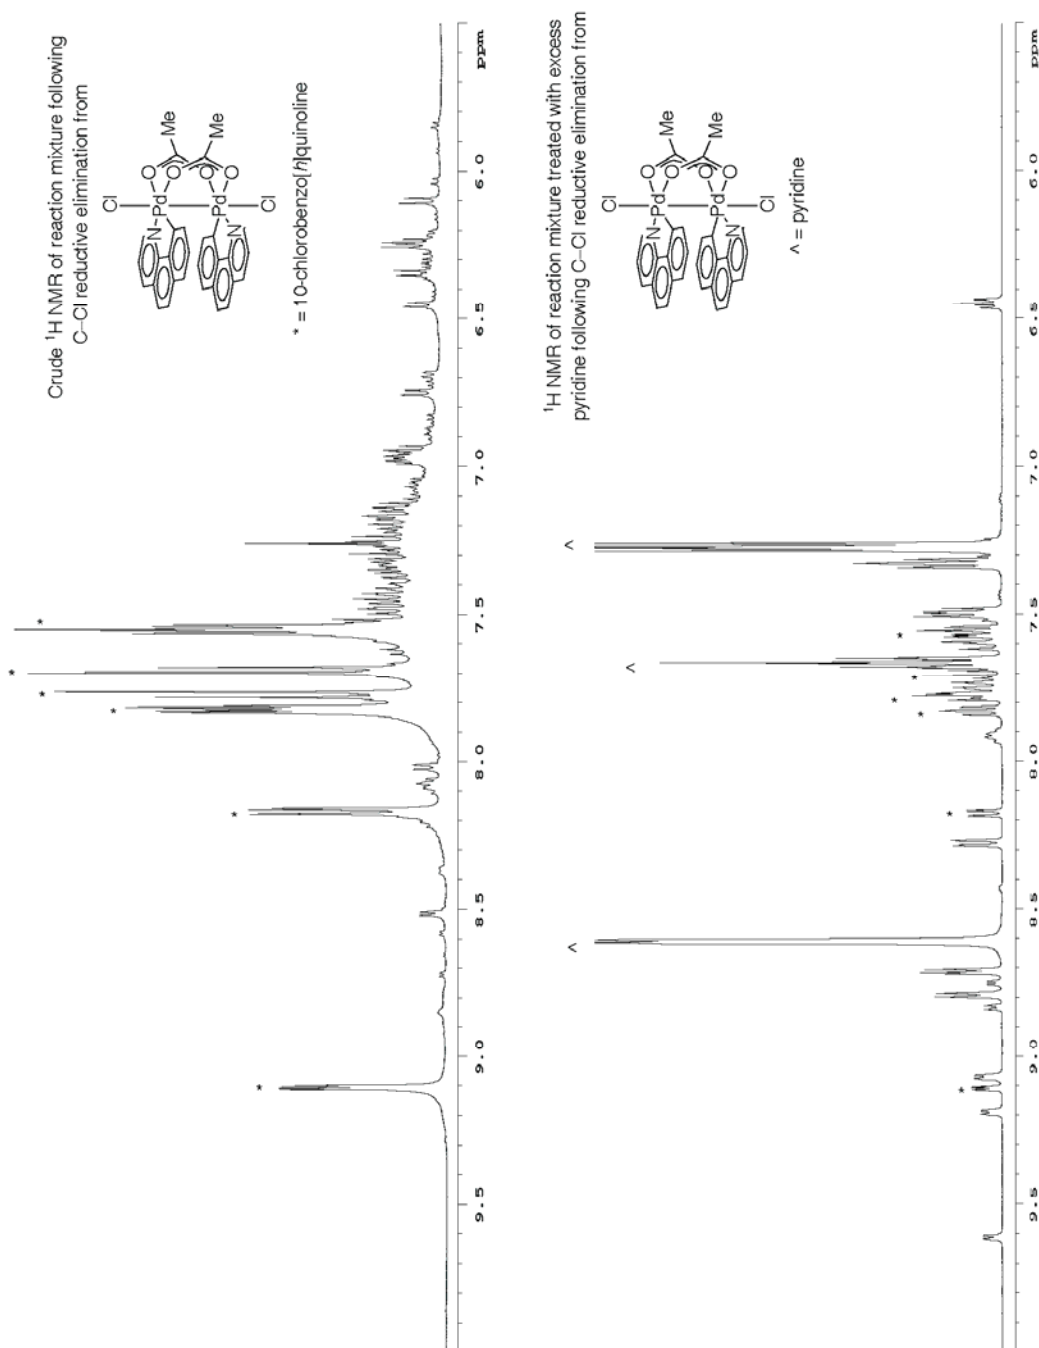

$^1\text{H}$  NMR spectra of the crude reaction mixture following reductive elimination from **1** (top) and after treatment with excess pyridine (bottom) in  $\text{CDCl}_3$  at  $23^\circ\text{C}$ .

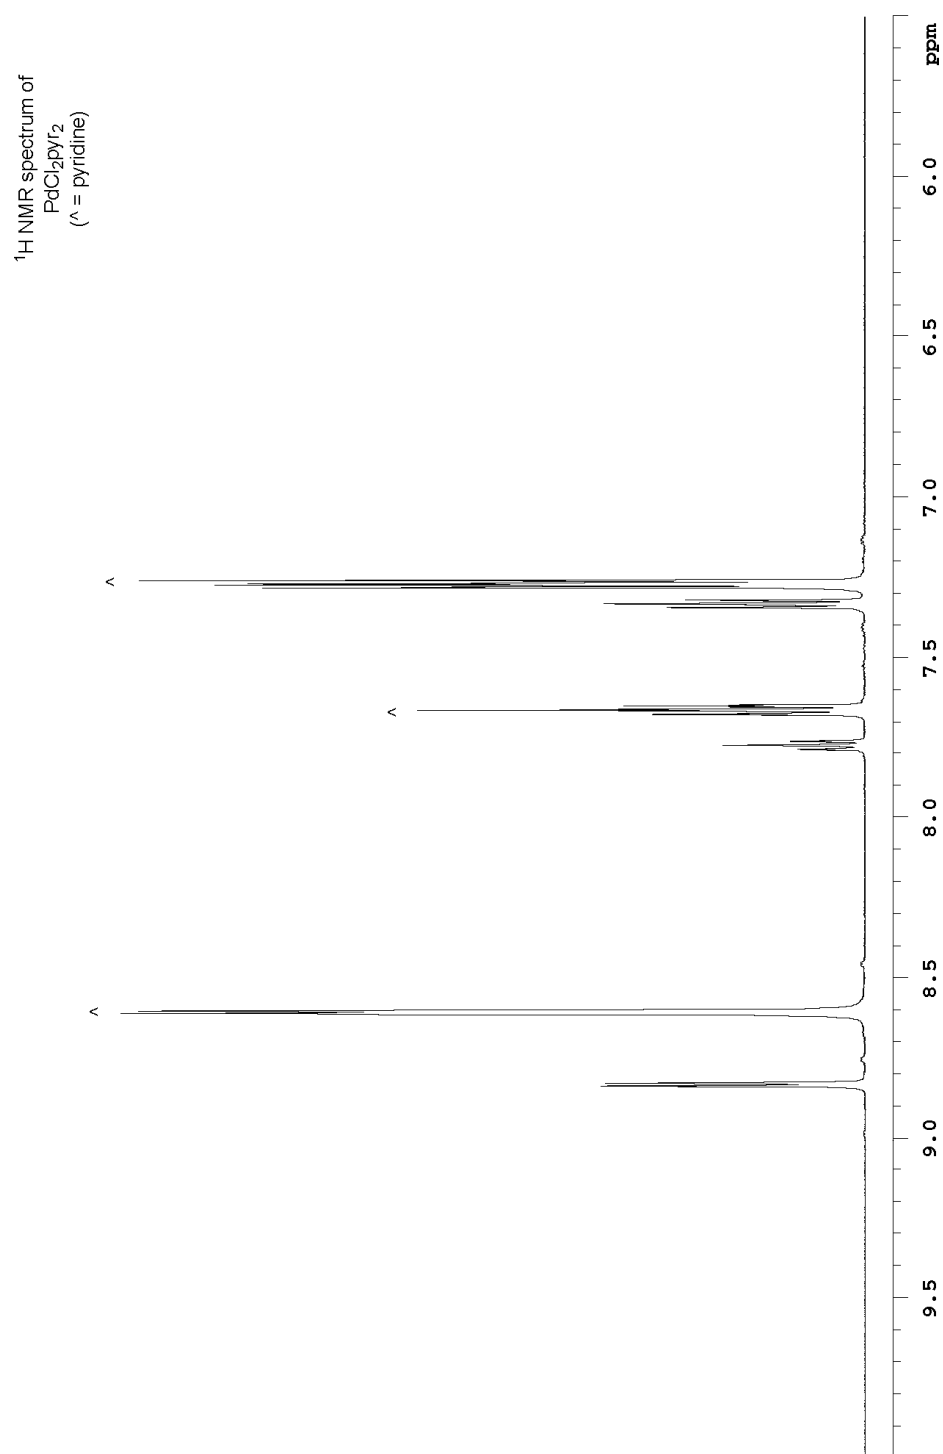

<sup>1</sup>H NMR spectrum of PdCl<sub>2</sub>py<sub>2</sub> (**13**) and pyridine in CDCl<sub>3</sub> at 23 °C.

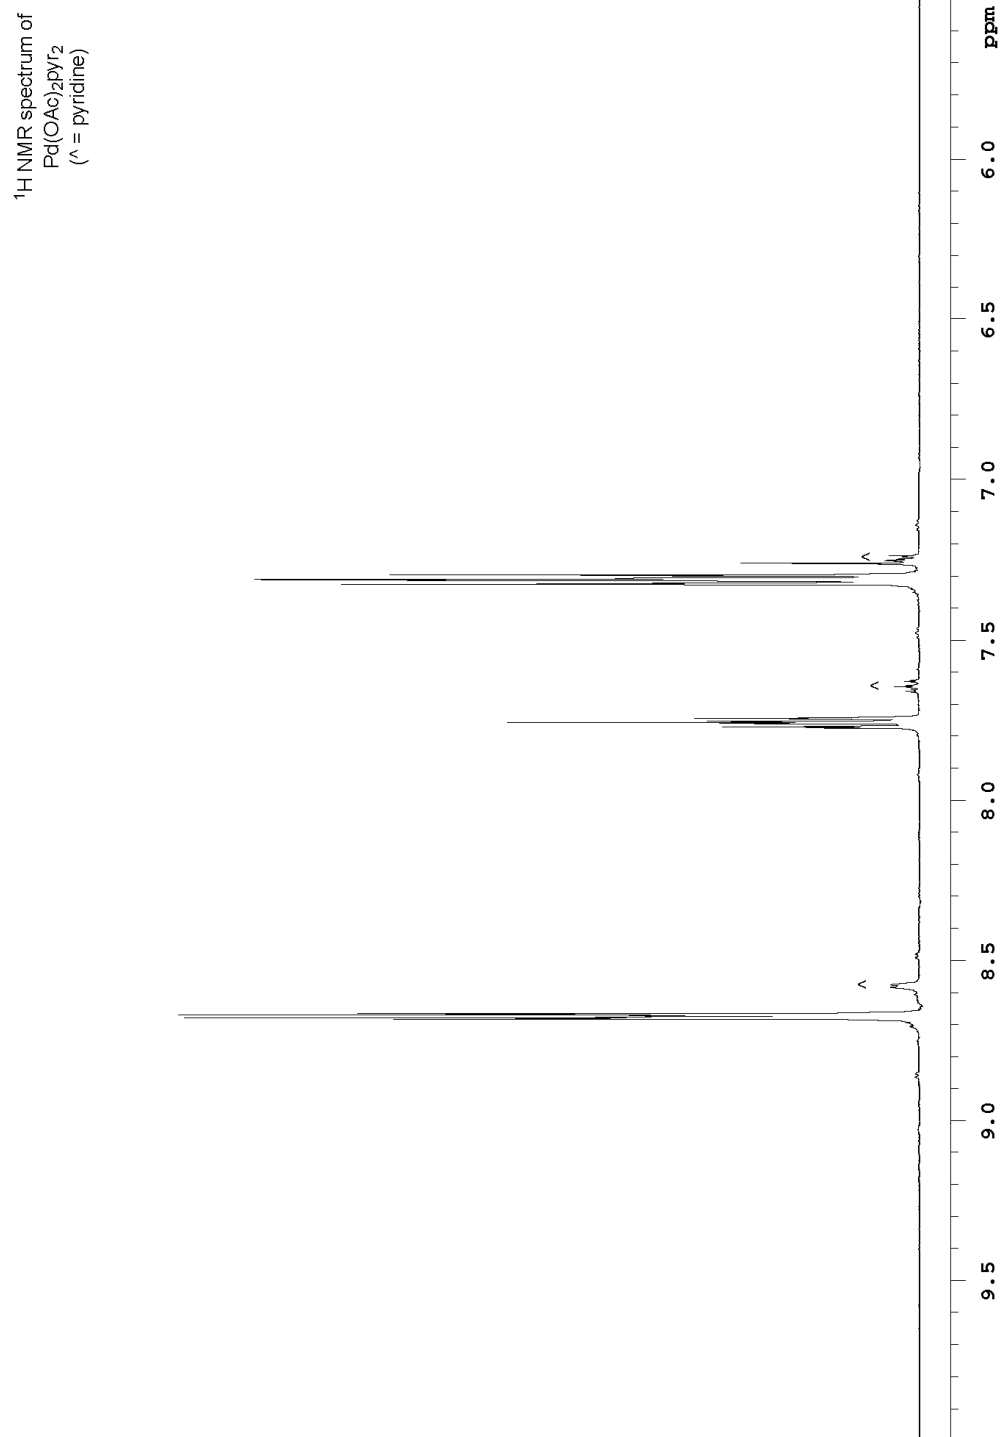

$^1\text{H}$  NMR spectrum of  $\text{Pd}(\text{OAc})_2\text{pyr}_2$  (**14**) and pyridine in  $\text{CDCl}_3$  at 23 °C.

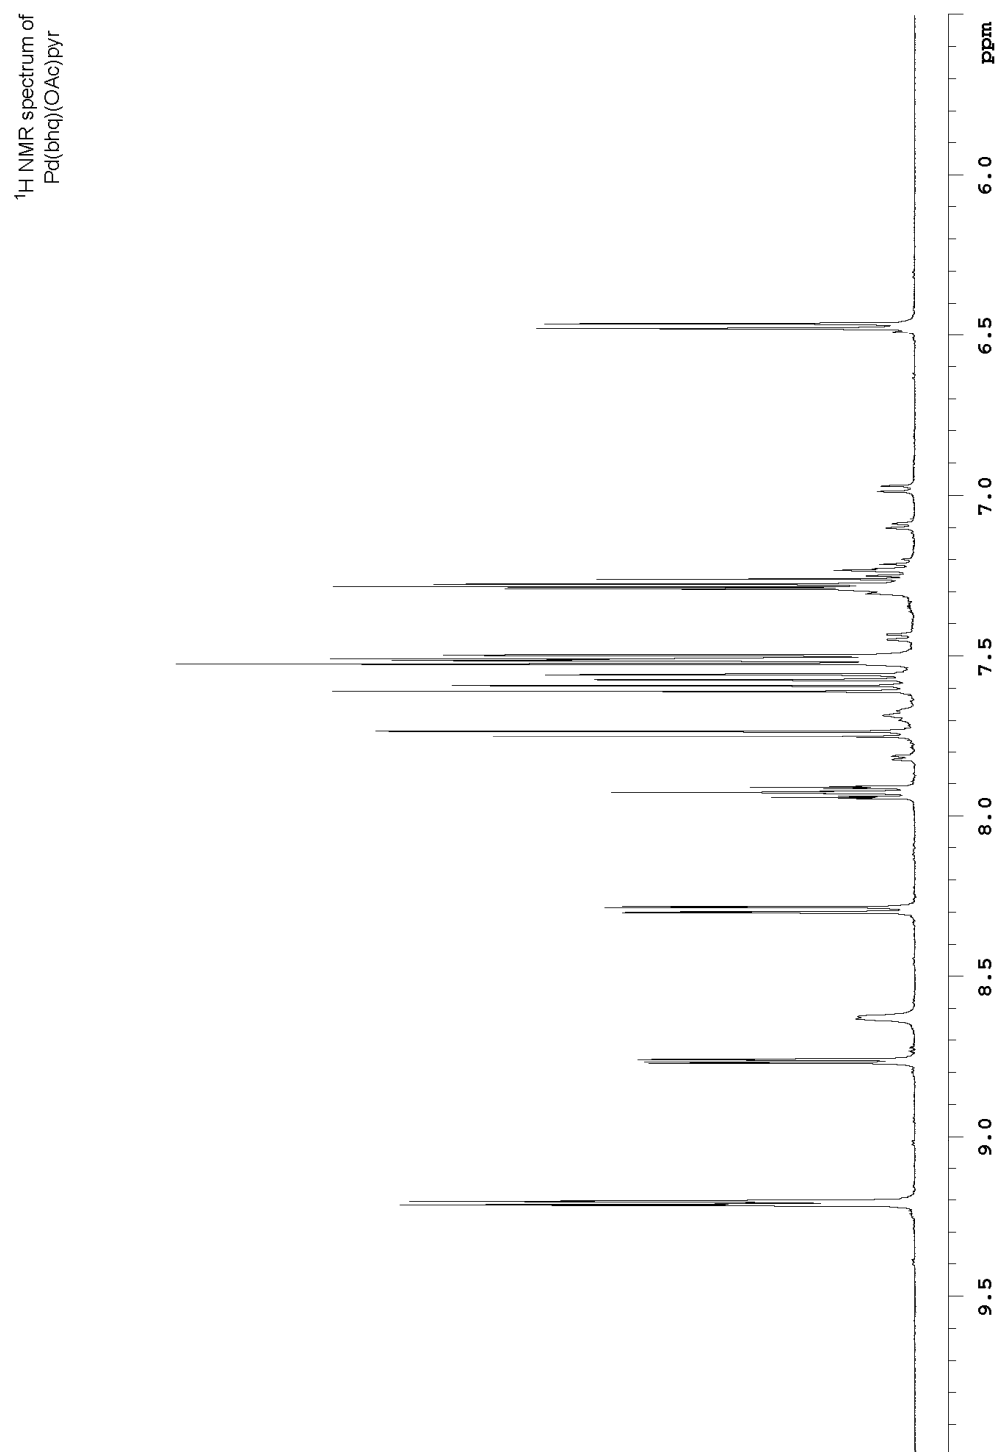

<sup>1</sup>H NMR spectrum of Pd(bhq)(OAc)pyr (**15**) in CDCl<sub>3</sub> at 23 °C.

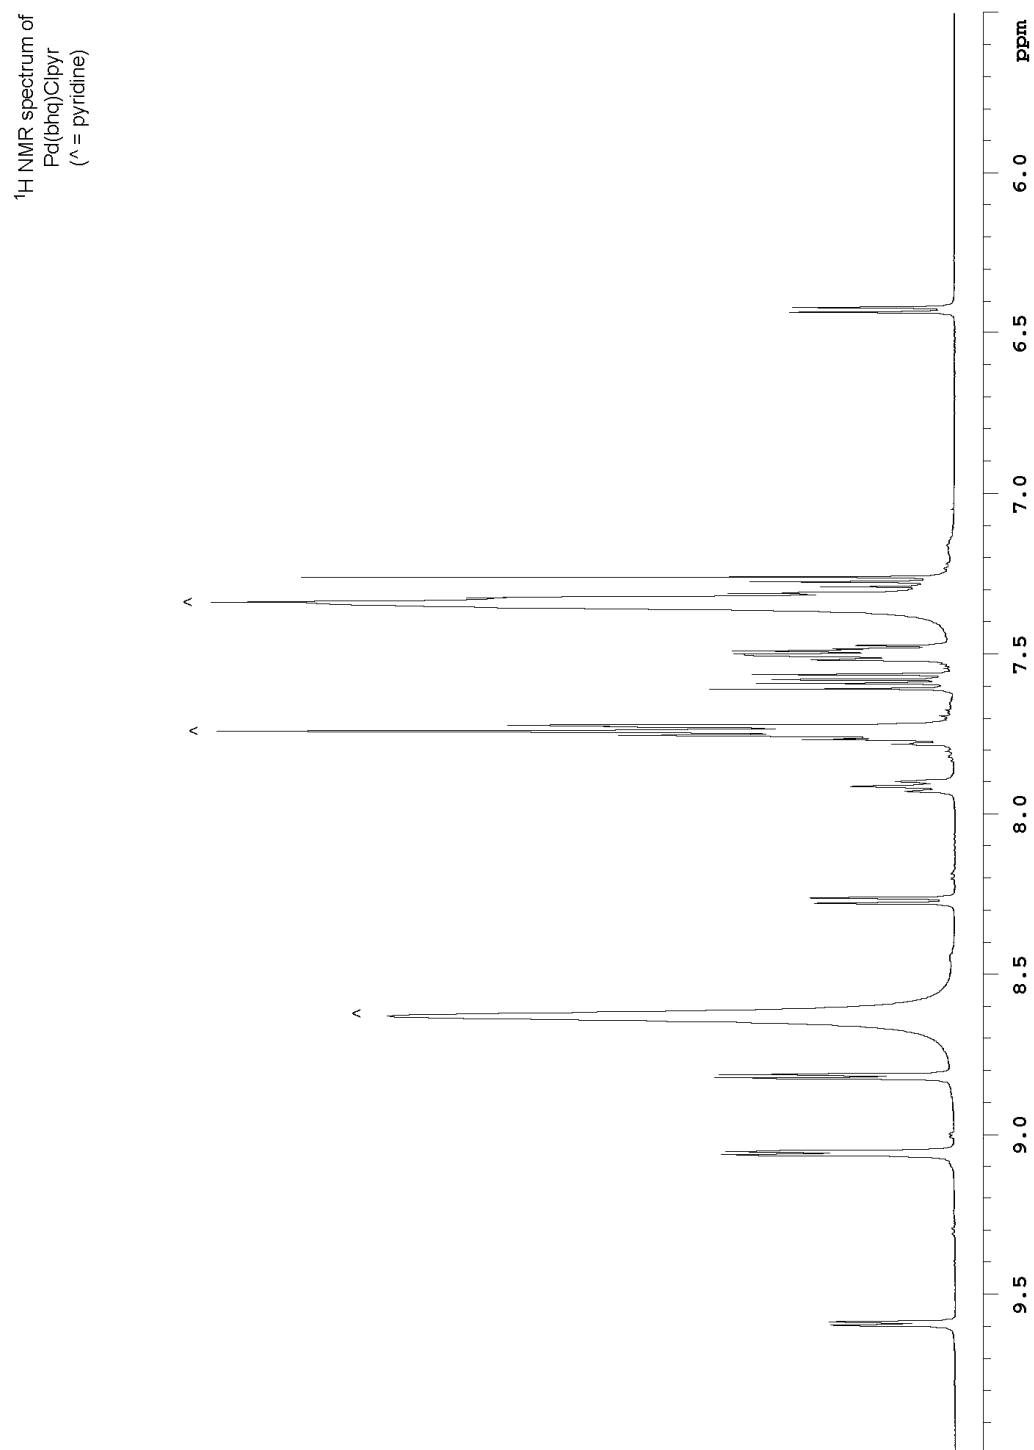

<sup>1</sup>H NMR spectrum of Pd(bhq)Clpy (**16**) and pyridine in CDCl<sub>3</sub> at 23 °C.

**Conversion of Pd-Containing Mixture 3 to 9:**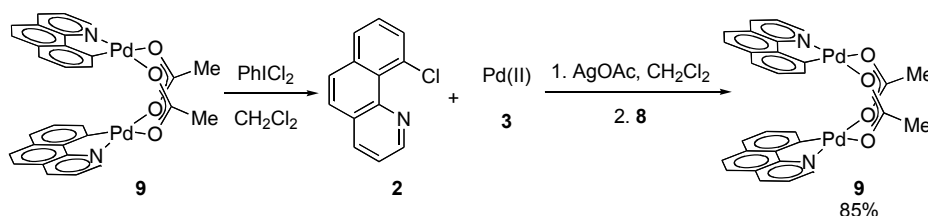

Additional information about the constitution of the palladium-containing byproducts of reductive elimination was obtained by sequential treatment of the palladium-containing byproducts (**3**) with AgOAc and benzo[*h*]quinoline (**8**) to reform **9**. Details of this sequence are presented below.

To a solution of benzo[*h*]quinolynyl palladium acetate dimer (**9**) (100 mg, 0.0145 mmol, 1.00 equiv) in CH<sub>2</sub>Cl<sub>2</sub> (4mL) was added PhICl<sub>2</sub> (40.0 mg, 0.0145 mmol, 1.00 equiv) at 23 °C. The mixture immediately turned dark red. After stirring for three hours at 23 °C, the solution was yellow. Solvent was removed *in vacuo*. The residue was triturated with Et<sub>2</sub>O to remove **2** and PhI. The residue obtained by filtration was dissolved in CH<sub>2</sub>Cl<sub>2</sub>. AgOAc (97.1 mg, 0.0582 mmol, 4.00 equiv) was added and the reaction was stirred for three hours. Solids were removed by filtration through celite before benzo[*h*]quinoline (**8**) (19.5 mg, 0.0109 mmol, 1.50 equiv) was added to the filtrate. The solution was stirred for 16 hours at 23 °C. Solvent was removed *in vacuo* and the residue was triturated with Et<sub>2</sub>O to afford 85.0 mg of compound as a yellow solid (85% yield from **9**).

Spectral properties are identical to those reported above.

**Hammett Analysis Based on Substitution of Benzo[*h*]quinolynyl Ligand (Data Pertaining to Figure 2)****Synthesis of 7-Substituted Benzo[*h*]quinolines****7-Nitrobenzo[*h*]quinoline (S7)**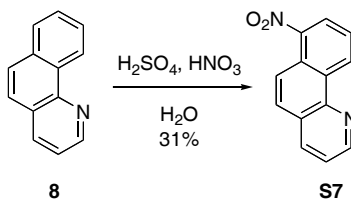

Under air, benzo[*h*]quinoline (**8**) (5.45 g, 30.4 mmol, 1.00 equiv) was dissolved in concentrated H<sub>2</sub>SO<sub>4</sub> (11 mL) at 23 °C. The reaction mixture was cooled to 0 °C and the mixture of concentrated H<sub>2</sub>SO<sub>4</sub> (3.6 mL) and HNO<sub>3</sub> (5.8 mL) (prepared by combining H<sub>2</sub>SO<sub>4</sub> and HNO<sub>3</sub> at 0 °C) was added dropwise over 20 min. The reaction mixture was stirred at 0 °C for 15 min and was subsequently poured onto water (300 mL). The precipitate was filtered, dried and purified by chromatography on silica gel eluting with CH<sub>2</sub>Cl<sub>2</sub>/hexanes 1:1 (v/v) to afford 2.11 g of the title compound<sup>9</sup> as a pale yellow solid (31% yield).



$R_f = 0.78$  ( $\text{CH}_2\text{Cl}_2$ ). NMR Spectroscopy:  $^1\text{H}$  NMR (500 MHz,  $\text{CDCl}_3$ , 25 °C,  $\delta$ ): 9.65 (d,  $J = 8.0$  Hz, 1H), 9.03 (dd,  $J = 4.5$  Hz,  $J = 2.0$  Hz, 1H), 8.43 (d,  $J = 9.5$  Hz, 1H), 8.32 (dd,  $J = 7.5$  Hz,  $J = 1.0$  Hz, 1H), 8.21 (dd,  $J = 8.0$  Hz,  $J = 1.5$  Hz, 1H), 7.88 (d,  $J = 9.0$  Hz, 1H), 7.77 (dd,  $J = 8.0$  Hz,  $J = 8.0$  Hz, 1H), 7.61 (dd,  $J = 8.0$  Hz,  $J = 4.5$  Hz, 1H).  $^{13}\text{C}$  NMR (125 MHz,  $\text{CDCl}_3$ , 25 °C,  $\delta$ ): 149.9, 146.9, 145.3, 135.9, 132.9, 130.4, 129.0, 125.9, 125.6, 125.6, 125.1, 123.0, 121.3. Mass Spectrometry: HRMS-FIA ( $m/z$ ): Calcd for  $[\text{C}_{13}\text{H}_8\text{N}_2\text{O}_2 + \text{H}]$ , 225.06585. Found, 225.06650. These data correspond to those reported in the literature.<sup>10</sup>

### 7-Aminobenzo[*h*]quinoline (S8)

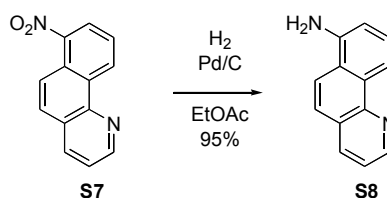

To 7-nitrobenzo[*h*]quinoline (**S7**) (400 mg, 1.78 mmol, 1.00 equiv) in EtOAc (30 mL) at 23 °C was added 10% Pd/C (197 mg).  $\text{H}_2$  gas (1 atm) was introduced using a balloon and the reaction mixture was stirred for 1.0 hr at 23 °C. The reaction mixture was filtered through a pad of celite and the filtrate was concentrated to afford 328 mg of the title compound as a brown solid (95% yield).

$R_f = 0.30$  ( $\text{CH}_2\text{Cl}_2$ ). NMR Spectroscopy:  $^1\text{H}$  NMR (500 MHz,  $\text{CDCl}_3$ , 23 °C,  $\delta$ ): 8.99 (dd,  $J = 4.0$  Hz,  $J = 1.5$  Hz, 1H), 8.79 (d,  $J = 8.5$  Hz, 1H), 8.13 (dd,  $J = 8.0$  Hz,  $J = 1.5$  Hz, 1H), 7.82 (d,  $J = 9.0$  Hz, 1H), 7.62 (d,  $J = 9.5$  Hz, 1H), 7.54 (dd,  $J = 7.5$  Hz,  $J = 7.5$  Hz, 1H), 7.49 (dd,  $J = 8.0$  Hz,  $J = 4.5$  Hz, 1H), 7.02 (dd,  $J = 7.5$  Hz,  $J = 1.0$  Hz, 1H), 4.19 (br s, 2H).  $^{13}\text{C}$  NMR (125 MHz,  $\text{CDCl}_3$ , 25 °C,  $\delta$ ): 146.8, 146.7, 142.4, 135.7, 132.5, 127.5, 126.1, 124.0, 122.4, 121.7, 120.5, 115.3, 113.5. Mass Spectrometry: HRMS-FIA ( $m/z$ ): Calcd for  $[\text{C}_{13}\text{H}_{10}\text{N}_2 + \text{H}]$ , 195.09222. Found, 195.09235. These data correspond to those reported in the literature.<sup>10</sup>

### 7-Cyanobenzo[*h*]quinoline (S9)

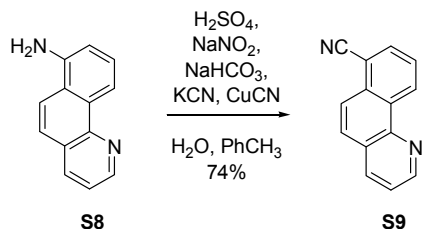

Under air, to 7-aminobenzo[*h*]quinoline (**S8**) (202 mg, 1.04 mmol, 1.00 equiv) in  $\text{H}_2\text{O}$  (4.0 mL), concentrated sulfuric acid (110  $\mu\text{L}$ , 2.08 mmol, 2.00 equiv) was added dropwise at 0 °C. After stirring for 10 min, a solution of  $\text{NaNO}_2$  (86.1 mg, 1.25 mmol, 1.20 equiv) in  $\text{H}_2\text{O}$  (2.0 mL) was added dropwise and the reaction mixture was stirred for 30 min at 0 °C.  $\text{NaHCO}_3$  (350 mg, 4.16 mmol, 4.00 equiv),  $\text{H}_2\text{O}$  (5.0

mL), and toluene (5.0 mL) were added and the reaction mixture was warmed to 23 °C over 15 min. A solution of KCN (464 mg, 7.12 mmol, 6.85 equiv) and CuCN (233 mg, 2.60 mmol, 2.50 equiv) in H<sub>2</sub>O (2.0 mL) was added dropwise. The reaction mixture was warmed to 70 °C, stirred for 2.0 hr, and cooled to 23 °C. The cooled mixture was extracted with EtOAc (3 x 15 mL). The combined organic phases were washed with brine, dried (MgSO<sub>4</sub>), and concentrated in vacuo. The crude product was purified by chromatography on silica gel eluting with EtOAc/hexanes 1:9 (v/v) to afford 155 mg of the title compound as a brown solid (74% yield).

$R_f$  = 0.15 (hexanes/EtOAc 14 :1 (v/v)). NMR Spectroscopy: <sup>1</sup>H NMR (500 MHz, CDCl<sub>3</sub>, 23 °C,  $\delta$ ): 9.55 (d,  $J$  = 8.5 Hz, 1H), 9.05 (d,  $J$  = 4.5 Hz, 1H), 8.24 (d,  $J$  = 8.0 Hz, 1H), 8.20 (d,  $J$  = 9.0 Hz, 1H), 8.07 (d,  $J$  = 7.5 Hz, 1H), 7.90 (d,  $J$  = 9.0 Hz, 1H), 7.77 (ddd,  $J$  = 8.0 Hz,  $J$  = 8.0 Hz,  $J$  = 1.0 Hz, 1H), 7.61 (ddd,  $J$  = 8.0 Hz,  $J$  = 4.0 Hz,  $J$  = 2.0 Hz, 1H). <sup>13</sup>C NMR (125 MHz, CDCl<sub>3</sub>, 25 °C,  $\delta$ ): 149.8, 145.7, 136.1, 133.8, 133.4, 131.7, 129.6, 128.5, 126.4, 126.3, 123.9, 122.8, 117.9, 110.1. Mass Spectrometry: HRMS-FIA (m/z): Calcd for [C<sub>14</sub>H<sub>8</sub>N<sub>2</sub> + H], 205.07657. Found, 205.07669. These data correspond to those reported in the literature.<sup>10</sup>

### 7-Formylbenzo[*h*]quinoline (S10)

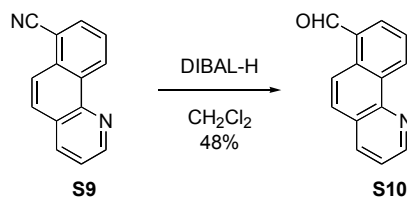

To 7-cyanobenzo[*h*]quinoline (**S9**) (84.6 mg, 0.414 mmol, 1.00 equiv) in CH<sub>2</sub>Cl<sub>2</sub> (5.0 mL) at -78 °C, diisobutylaluminum hydride (1.0 M in hexanes, 0.83 mL, 0.83 mmol, 2.0 equiv) was added dropwise and the reaction mixture was stirred for 1.5 hr. An additional equivalent of diisobutylaluminum hydride (1.0 M in hexanes, 0.42 mL, 0.42 mmol, 1.0 equiv) was added dropwise. The reaction mixture was stirred for 30 min and warmed to 23 °C. The reaction was quenched with 1N HCl (5.0 mL), and extracted with CH<sub>2</sub>Cl<sub>2</sub> (3 × 10 mL). The combined organic phases were washed with NaHCO<sub>3</sub> (aq) and brine, dried (MgSO<sub>4</sub>), and concentrated in vacuo. The crude mixture was filtered through a plug of silica gel eluting with CH<sub>2</sub>Cl<sub>2</sub> and concentrated in vacuo to afford 41.3 mg of the title compound as a tan solid (48 % yield).

$R_f$  = 0.33 (hexanes/EtOAc 5:1 (v/v)). NMR Spectroscopy: <sup>1</sup>H NMR (500 MHz, CDCl<sub>3</sub>, 25 °C,  $\delta$ ): 10.51 (s, 1H), 9.68 (d,  $J$  = 8.5 Hz, 1H), 9.26 (d,  $J$  = 9.5 Hz, 1H), 9.05 (dd,  $J$  = 4.5 Hz,  $J$  = 1.5 Hz, 1H), 8.25 (dd,  $J$  = 8.0 Hz,  $J$  = 2.0 Hz, 1H), 8.19 (dd,  $J$  = 7.0 Hz,  $J$  = 1.0 Hz, 1H), 7.93–7.89 (m, 2H), 7.60 (dd,  $J$  = 8.0 Hz,  $J$  = 4.5 Hz, 1H). <sup>13</sup>C NMR (125 MHz, CDCl<sub>3</sub>, 25 °C,  $\delta$ ): 193.6, 149.4, 145.8, 137.2, 135.8, 132.2, 131.7, 131.2, 131.1, 128.7, 126.3, 126.2, 123.5, 122.5. Mass Spectrometry: HRMS-FIA (m/z): Calcd for [C<sub>14</sub>H<sub>9</sub>NO + H], 208.07624. Found, 208.07655. These data correspond to those reported in the literature.<sup>10</sup>

**7-Chlorobenzo[*h*]quinoline (S11)**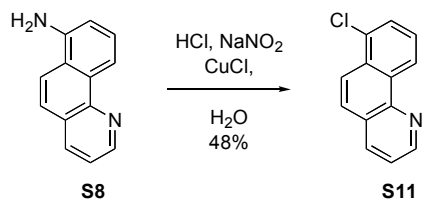

Under air, 7-aminobenzo[*h*]quinoline (**S8**) (123 mg, 0.633 mmol, 1.00 equiv) was dissolved in 2N HCl (3.8 mL) at 0 °C. To the reaction mixture was added a solution of NaNO<sub>2</sub> (52.4 mg, 0.760 mmol, 1.20 equiv) in H<sub>2</sub>O (1.6 mL) dropwise over 2 min. The reaction mixture was stirred for 30 min at 0 °C and a solution of CuCl (62.7 mg, 0.633 mmol, 1.00 equiv) in concentrated HCl (1.6 mL) was added dropwise over 2 min. The reaction mixture was warmed to 23 °C and further stirred for 1.0 hr before aqueous NaHCO<sub>3</sub> (10 mL) was added. To the reaction mixture was added CH<sub>2</sub>Cl<sub>2</sub> (10 mL) and the phases were separated. The aqueous layer was extracted with CH<sub>2</sub>Cl<sub>2</sub> (3 × 10 mL). The combined organic phases were washed with brine (10 mL) and dried (Na<sub>2</sub>SO<sub>4</sub>). The filtrate was concentrated in vacuo and the residue was purified by chromatography on silica gel eluting with hexanes/CH<sub>2</sub>Cl<sub>2</sub> 1:2 (v/v) to afford 65.2 mg of the title compound as a pale-yellow solid (48% yield).

$R_f$  = 0.79 (CH<sub>2</sub>Cl<sub>2</sub>). NMR Spectroscopy: <sup>1</sup>H NMR (500 MHz, CDCl<sub>3</sub>, 25 °C,  $\delta$ ): 9.26 (d,  $J$  = 8.5 Hz, 1H), 9.02 (dd,  $J$  = 4.5 Hz,  $J$  = 2.0 Hz, 1H), 8.27 (d,  $J$  = 9.5 Hz, 1H), 8.19 (dd,  $J$  = 8.0 Hz,  $J$  = 2.0 Hz, 1H), 7.79–7.76 (m, 2H), 7.64 (dd,  $J$  = 8.5 Hz,  $J$  = 8.5 Hz, 1H), 7.55 (dd,  $J$  = 8.0 Hz,  $J$  = 4.5 Hz, 1H). <sup>13</sup>C NMR (125 MHz, CDCl<sub>3</sub>, 25 °C,  $\delta$ ): 149.3, 146.1, 135.9, 133.1, 131.9, 130.8, 128.6, 127.0, 126.5, 126.2, 123.4, 123.4, 122.3. Mass Spectrometry: HRMS-FIA ( $m/z$ ): Calcd for [C<sub>13</sub>H<sub>8</sub>ClN + H], 214.04235. Found, 214.04200. These data correspond to those reported in the literature.<sup>10</sup>

**7-Iodobenzo[*h*]quinoline (S12)**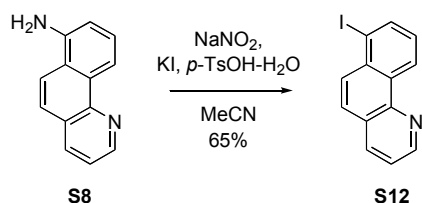

To a solution of *p*-toluenesulfonic acid monohydrate (896 mg, 4.71 mmol, 3.00 equiv) in acetonitrile (6.0 mL) under air was added 7-aminobenzo[*h*]quinoline (**S8**) (305 mg, 1.57 mmol, 1.00 equiv). The reaction mixture was cooled to 10 °C and a solution of NaNO<sub>2</sub> (217 mg, 3.14 mmol, 2.00 equiv) and KI (652 mg, 3.93 mmol, 2.50 equiv) in H<sub>2</sub>O (1.0 mL) was added dropwise, and the reaction was stirred for 10 min, warmed to 23 °C, and stirred for an additional 1.5 hr. H<sub>2</sub>O (15 mL), Na<sub>2</sub>S<sub>2</sub>O<sub>3</sub> (2 mL) and sat. NaHCO<sub>3</sub> (aq) were added to basify the solution. The reaction mixture was extracted with EtOAc (10 mL) and CH<sub>2</sub>Cl<sub>2</sub> (2 × 15 mL). The combined organic phases were dried (Na<sub>2</sub>SO<sub>4</sub>) and concentrated in vacuo. The residue was purified by chromatography on silica gel eluting with CH<sub>2</sub>Cl<sub>2</sub>/hexanes 2:1 (v/v) to afford 311

mg of the title compound as a light yellow crystalline solid (65% yield).

$R_f = 0.52$  ( $\text{CH}_2\text{Cl}_2/\text{hexanes}$  2:1 (v/v)). NMR Spectroscopy:  $^1\text{H}$  NMR (500 MHz,  $\text{CDCl}_3$ , 25 °C,  $\delta$ ): 9.37 (dd,  $J = 9.5$  Hz,  $J = 1.0$  Hz, 1H), 9.03 (dd,  $J = 4.5$  Hz,  $J = 1.5$  Hz, 1H), 8.28 (dd,  $J = 7.5$  Hz,  $J = 1.5$  Hz, 1H), 8.22 (dd,  $J = 8.0$  Hz,  $J = 1.5$  Hz, 1H), 8.13 (d,  $J = 9.5$  Hz, 1H), 7.79 (d,  $J = 9.5$  Hz, 1H), 7.57 (dd,  $J = 8.5$  Hz,  $J = 4.5$  Hz, 1H), 7.44 (dd,  $J = 7.5$  Hz,  $J = 7.5$  Hz, 1H).  $^{13}\text{C}$  NMR (125 MHz,  $\text{CDCl}_3$ , 25 °C,  $\delta$ ): 149.5, 146.2, 139.7, 136.0, 134.7, 132.9, 131.5, 128.2, 127.2, 126.2, 125.3, 122.5, 99.4. Mass Spectrometry: HRMS-FIA ( $m/z$ ): Calcd for  $[\text{C}_{13}\text{H}_8\text{IN} + \text{H}]$ , 305.97797. Found, 305.97765. These data correspond to those reported in the literature.<sup>10</sup>

### 7-Methylbenzo[*h*]quinoline (S13)

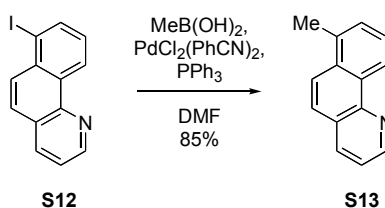

Under air, to 7-iodobenzo[*h*]quinoline (S12) (289 mg, 0.950 mmol, 1.00 equiv), methylboronic acid (623 mg, 2.84 mmol, 3.00 equiv),  $\text{PdCl}_2(\text{PhCN})_2$  (36.0 mg, 0.095 mmol, 0.100 equiv),  $\text{PPh}_3$  (50.0 mg, 0.190 mmol, 0.200 equiv), and potassium carbonate (393 mg, 2.84 mmol, 3.00 equiv), was added  $\text{DMF}$  (7.2 mL). The reaction mixture was heated to 110 °C for 5.5 hr. After cooling to 23 °C, the reaction mixture was diluted with  $\text{H}_2\text{O}$  (10 mL) and extracted with  $\text{CH}_2\text{Cl}_2$  ( $3 \times 10$  mL). The combined organic extracts were dried with  $\text{Na}_2\text{SO}_4$  and concentrated in vacuo. The crude product was purified by chromatography on silica gel eluting with  $\text{CH}_2\text{Cl}_2$  to afford 155 mg of the title compound as a light yellow solid (85% yield).

$R_f = 0.57$  ( $\text{CH}_2\text{Cl}_2$ ). NMR Spectroscopy:  $^1\text{H}$  NMR (500 MHz,  $\text{CDCl}_3$ , 25 °C,  $\delta$ ): 9.22 (d,  $J = 8.0$  Hz, 1H), 9.01 (dd,  $J = 4.5$  Hz,  $J = 2.0$  Hz, 1H), 8.18 (dd,  $J = 8.0$  Hz,  $J = 1.5$  Hz, 1H), 8.03 (d,  $J = 9.5$  Hz, 1H), 7.73 (d,  $J = 9.5$  Hz, 1H), 7.64 (dd,  $J = 8.0$  Hz,  $J = 7.0$  Hz, 1H), 7.56–7.51 (m, 2H), 2.78 (s, 3H).  $^{13}\text{C}$  NMR (125 MHz,  $\text{CDCl}_3$ , 25 °C,  $\delta$ ): 149.0, 147.0, 135.9, 134.4, 132.6, 131.8, 129.5, 126.8, 126.1, 125.2, 124.0, 122.7, 121.8, 19.9. Mass Spectrometry: HRMS-FIA ( $m/z$ ): Calcd for  $[\text{C}_{14}\text{H}_{11}\text{N} + \text{H}]$ , 194.09697. Found, 194.09667. These data correspond to those reported in the literature.<sup>10</sup>

**Synthesis of 7-Substituted Benzo[*h*]quinolinyll palladium acetate dimers****7-Formylbenzo[*h*]quinolinyll palladium acetate dimer (S14)**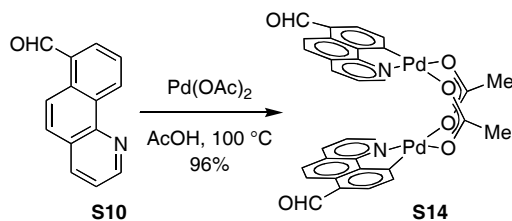

To a suspension of 7-formylbenzo[*h*]quinoline (**S10**) (102 mg, 0.490 mmol, 1.00 equiv) in AcOH (3.0 mL) at 23 °C was added Pd(OAc)<sub>2</sub> (110 mg, 0.490 mmol, 1.00 equiv) and the reaction mixture was heated to 100 °C for 10 minutes. After cooling to 23 °C, the reaction mixture was concentrated in vacuo and the residue was triturated with Et<sub>2</sub>O (3 × 1 mL) to afford 175 mg of the title compound as a yellow solid (96% yield) in a 6:1 ratio of isomers (7-formylbenzo[*h*]quinolinyll ligands head to tail vs. head to head).

Melting Point: >250 °C. <sup>1</sup>H-NMR (600 MHz, CD<sub>2</sub>Cl<sub>2</sub>, 23 °C, δ): Major Isomer : 10.19 (s, 2H), 8.63 (d, *J* = 8.9 Hz, 2H), 7.95 (dd, *J* = 5.1 Hz, *J* = 1.3 Hz, 2H), 7.65 (dd, *J* = 8.1 Hz, *J* = 1.3 Hz, 2H), 7.59 (d, *J* = 7.5 Hz, 2H), 7.28 (d, 8.9 Hz, 2H), 7.24 (d, *J* = 7.5 Hz, 2H), 6.68 (dd, *J* = 8.1 Hz, *J* = 5.3 Hz, 2H), 2.37 (s, 6H). Minor Isomer : 10.00 (s, 2H), 8.56 (d, *J* = 8.9 Hz, 2H), 8.16 (dd, *J* = 5.1 Hz, *J* = 1.3 Hz, 2H), 7.87 (dd, *J* = 7.9 Hz, *J* = 1.3 Hz, 2H), 7.31 (d, *J* = 8.9, 2H), 7.07 (dd, *J* = 8.1 Hz, *J* = 5.1 Hz, 2H), 6.98 (d, *J* = 7.5 Hz, 2H). <sup>13</sup>C-NMR (125 MHz, CD<sub>2</sub>Cl<sub>2</sub>, 23 °C, δ): Major Isomer: 193.13, 182.82, 160.59, 152.42, 149.35, 140.12, 136.50, 136.25, 129.92, 129.02, 127.51, 126.50, 125.65, 125.38, 121.24, 25.00. Minor Isomer: 192.83, 160.19, 153.50, 152.42, 147.98, 136.72, 136.03, 130.45, 126.16, 121.48. UV-VIS Spectroscopy (CH<sub>2</sub>Cl<sub>2</sub>, 23 °C): 420 nm (ε = 3.11 × 10<sup>3</sup> M<sup>-1</sup> cm<sup>-1</sup>); 379 nm (ε = 5.80 × 10<sup>3</sup> M<sup>-1</sup> cm<sup>-1</sup>); 340 nm (ε = 1.94 × 10<sup>4</sup> M<sup>-1</sup> cm<sup>-1</sup>); 300 nm (ε = 3.01 × 10<sup>4</sup> M<sup>-1</sup> cm<sup>-1</sup>). Mass Spectrometry: LRMS-FIA (*m/z*): calcd for [C<sub>14</sub>H<sub>8</sub>NOPd+C<sub>2</sub>H<sub>3</sub>N]<sup>+</sup>, 352.9901. Found, 353.9928.

**7-Chlorobenzo[*h*]quinolinyll palladium acetate dimer (S15)**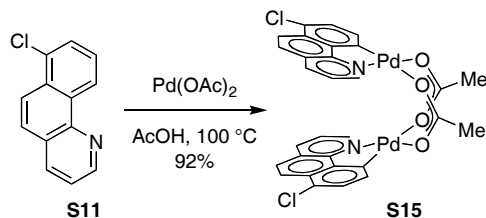

To a suspension of 7-chlorobenzo[*h*]quinoline (**S11**) (65.2 mg, 0.305 mmol, 1.00 equiv) in AcOH (3.0 mL) at 23 °C was added Pd(OAc)<sub>2</sub> (68.5 mg, 0.305 mmol, 1.00 equiv) and the reaction mixture was heated to 100 °C for 10 minutes. After cooling to 23 °C, the reaction mixture was concentrated in vacuo and the residue was triturated with Et<sub>2</sub>O (3 × 1 mL) to afford 106 mg of the title compound as a yellow solid (92% yield) in a 14:1 ratio of isomers (7-chlorobenzo[*h*]quinolinyll ligands head to tail vs. head to head).

head).

Melting Point: >250 °C (decomp.). <sup>1</sup>H-NMR (600 MHz, CDCl<sub>3</sub>, 23 °C, δ): Major Isomer : 7.92 (d, *J* = 5.1 Hz, 2H), 7.67 (d, *J* = 8.2 Hz, 2H), 7.59 (d, *J* = 8.9 Hz, 2H), 7.16 (d, *J* = 7.9 Hz, 2H), 7.14 (d, *J* = 8.9 Hz, 2H), 6.91 (d, *J* = 7.8 Hz, 2H), 6.74 (dd, *J* = 8.1 Hz, *J* = 5.1 Hz, 2H), 2.37 (s, 6H). Minor Isomer : 8.12 (d, *J* = 5.1 Hz, 2H), 7.77 (d, *J* = 7.9 Hz, 2H), 7.00 (d, *J* = 7.8 Hz, 2H), 6.96 (dd, *J* = 7.8, *J* = 5.3 Hz, 2H), 6.68 (d, *J* = 7.9 Hz, 2H). <sup>13</sup>C-NMR (125 MHz, CD<sub>2</sub>Cl<sub>2</sub>, 23 °C, δ): Major Isomer: 182.43, 152.50, 148.97, 146.62, 140.31, 135.29, 129.31, 129.18, 127.28, 126.23, 125.18, 124.08, 124.05, 120.71, 24.91. UV-VIS Spectroscopy (CH<sub>2</sub>Cl<sub>2</sub>, 23 °C): 384 nm (ε = 4.58 × 10<sup>3</sup> M<sup>-1</sup> cm<sup>-1</sup>); 291 nm (ε = 1.98 × 10<sup>4</sup> M<sup>-1</sup> cm<sup>-1</sup>). Mass Spectrometry: LRMS-FIA (m/z): calcd for [C<sub>13</sub>H<sub>7</sub>ClNPd+C<sub>2</sub>H<sub>3</sub>N]<sup>+</sup>, 358.9562. Found, 358.9580.

### 7-Iodobenzo[*h*]quinolinyll palladium acetate dimer (S16)

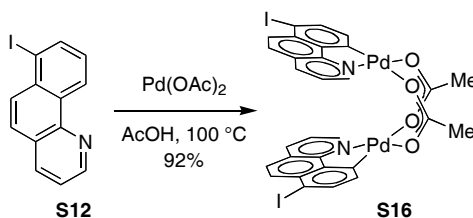

To a suspension of 7-iodobenzo[*h*]quinoline (S12) (85.0 mg, 0.279 mmol, 1.00 equiv) in AcOH (2.0 mL) at 23 °C was added Pd(OAc)<sub>2</sub> (62.5 mg, 0.279 mmol, 1.00 equiv) and the reaction mixture was heated to 100 °C for 10 minutes. After cooling to 23 °C, the reaction mixture was concentrated in vacuo and the residue was triturated with Et<sub>2</sub>O (3 × 1 mL) to afford 120 mg of the title compound as a dark yellow solid (92% yield) in a 19:1 ratio of isomers (7-iodobenzo[*h*]quinolinyll ligands head to tail vs. head to head).

Melting Point: >250 °C (decomp.). <sup>1</sup>H-NMR (500 MHz, CD<sub>2</sub>Cl<sub>2</sub>, 23 °C, δ): Major Isomer : 7.93 (d, *J* = 5.1 Hz, 2H), 7.80 (d, *J* = 8.1 Hz, 2H), 7.54 (d, *J* = 7.8 Hz, 2H), 7.39 (d, *J* = 8.9 Hz, 2H), 7.19 (d, 8.9 Hz, 2H), 6.83 (dd, *J* = 8.1 Hz, *J* = 5.1 Hz, 2H), 6.66 (d, *J* = 7.6 Hz, 2H), 2.31 (s, 6H). Minor Isomer : 8.10 (d, *J* = 5.4 Hz, 2H), 7.49 (d, *J* = 9.1 Hz, 2H), 7.44 (d, *J* = 7.8 Hz, 2H), 6.99 (dd, *J* = 8.1, *J* = 5.0 Hz, 2H), 6.48 (d, *J* = 7.6 Hz, 2H). <sup>13</sup>C-NMR (125 MHz, CD<sub>2</sub>Cl<sub>2</sub>, 23 °C, δ): Major Isomer: 182.54, 152.90, 149.54, 149.34, 140.55, 137.95, 135.85, 133.53, 131.41, 131.00, 125.56, 125.13, 121.54, 91.96, 25.03. UV-VIS Spectroscopy (CH<sub>2</sub>Cl<sub>2</sub>, 23 °C): 383 nm (ε = 4.65 × 10<sup>3</sup> M<sup>-1</sup> cm<sup>-1</sup>); 321 nm (ε = 1.15 × 10<sup>4</sup> M<sup>-1</sup> cm<sup>-1</sup>); 295 nm (ε = 2.17 × 10<sup>4</sup> M<sup>-1</sup> cm<sup>-1</sup>). Mass Spectrometry: LRMS-FIA (m/z): calcd for [C<sub>13</sub>H<sub>7</sub>INPd+C<sub>2</sub>H<sub>3</sub>N]<sup>+</sup>, 450.8918. Found, 450.8912.

### 7-Methylbenzo[*h*]quinolinyll palladium acetate dimer (S17)

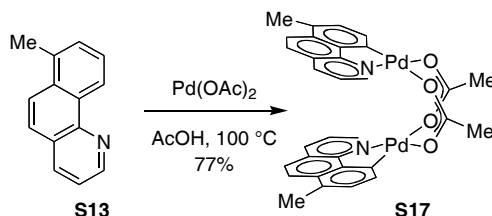

To a suspension of 7-methylbenzo[*h*]quinoline (**S13**) (97.0 mg, 0.502 mmol, 1.00 equiv) in AcOH (3 mL) at 23 °C was added Pd(OAc)<sub>2</sub> (113 mg, 0.502 mmol, 1.00 equiv) and the reaction mixture was heated to 100 °C for 10 minutes. After cooling to 23 °C, the reaction mixture was concentrated in vacuo and the residue was triturated with Et<sub>2</sub>O (3 × 1 mL) to afford 138 mg of the title compound as a yellow solid (77% yield) in a 7:1 ratio of isomers (7-methylbenzo[*h*]quinolinyl ligands head to tail vs. head to head).

Melting Point: >250 °C. <sup>1</sup>H-NMR (500 MHz, CD<sub>2</sub>Cl<sub>2</sub>, 23 °C, δ): Major Isomer : 7.80 (d, *J* = 5.0 Hz, 2H), 7.53 (d, *J* = 8.2 Hz, 2H), 7.41 (d, *J* = 8.7 Hz, 2H), 7.04 (d, *J* = 8.7 Hz, 2H), 6.97 (d, *J* = 7.3 Hz, 2H), 6.84 (d, *J* = 7.3 Hz, 2H), 6.54 (dd, *J* = 7.8 Hz, *J* = 5.0 Hz, 2H), 2.50 (s, 6H), 2.31 (s, 6H). Minor Isomer : 8.06 (d, *J* = 5.0 Hz, 2H), 7.76 (d, *J* = 7.8 Hz, 2H), 7.08 (d, *J* = 8.7 Hz, 2H), 6.93 (dd, *J* = 7.8, *J* = 5.0 Hz, 2H), 6.69 (d, *J* = 7.3 Hz, 2H), 6.56 (d, *J* = 7.3 Hz, 2H), 2.41 (s, 6H). <sup>13</sup>C-NMR (125 MHz, CD<sub>2</sub>Cl<sub>2</sub>, 23 °C, δ): Major Isomer: 182.22, 153.31, 149.02, 145.82, 139.85, 135.01, 131.59, 129.17, 128.94, 128.79, 125.25, 124.71, 122.99, 120.26. Minor Isomer: 147.36, 125.52, 121.97, 120.38, 114.39. UV-VIS Spectroscopy (CH<sub>2</sub>Cl<sub>2</sub>, 23 °C): 393 nm (ε = 4.26 × 10<sup>3</sup> M<sup>-1</sup> cm<sup>-1</sup>); 326 nm (ε = 7.27 × 10<sup>3</sup> M<sup>-1</sup> cm<sup>-1</sup>); 296 nm (ε = 1.65 × 10<sup>4</sup> M<sup>-1</sup> cm<sup>-1</sup>). Mass Spectrometry: LRMS-FIA (m/z): calcd for [C<sub>14</sub>H<sub>10</sub>NPd+C<sub>2</sub>H<sub>3</sub>N]<sup>+</sup>, 339.0108. Found, 339.0117.

### 7-Formylbenzo[*h*]quinolinyl chloro palladium(III) acetate dimer (**18b**)

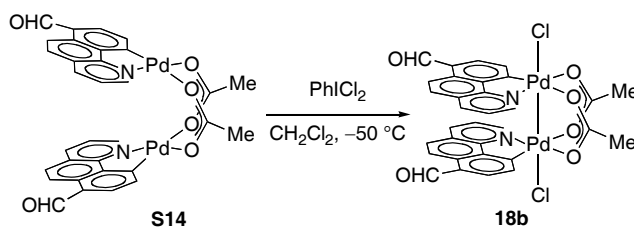

This reaction was carried out in a nitrogen-filled dry box. To a solution of 7-formylbenzo[*h*]quinolinyl palladium acetate dimer (**S14**) (16.0 mg, 2.16 × 10<sup>-5</sup> mol, 1.00 equiv) in CH<sub>2</sub>Cl<sub>2</sub> (1.5 mL) at -50 °C was added PhICl<sub>2</sub> (6.0 mg, 2.2 × 10<sup>-5</sup> mol, 1.00 equiv). The reaction mixture immediately turned from yellow to dark red. <sup>1</sup>H NMR analysis of the crude reaction product indicated a mixture of complexes and the <sup>1</sup>H NMR spectrum was too complicated for assignment of signals. Subsequent thermolysis of the crude mixture **18b** produced 7-formylbenzo[*h*]quinoline (**19b**) in 91% yield (*vide infra*). Further evidence that the crude reaction mixture is composed on complexes related to **18b** as drawn above is that the rate of formation of **19b** is measured to be as expected based on the σ-value of the formyl substituent (*vide infra*). UV-VIS Spectroscopy (CH<sub>2</sub>Cl<sub>2</sub>, 0 °C): 496 nm (ε = 9.14 × 10<sup>3</sup> M<sup>-1</sup> cm<sup>-1</sup>); 420 nm (ε = 2.48 × 10<sup>4</sup> M<sup>-1</sup> cm<sup>-1</sup>).

### 7-Chlorobenzo[*h*]quinolinyl chloro palladium(III) acetate dimer (18c)

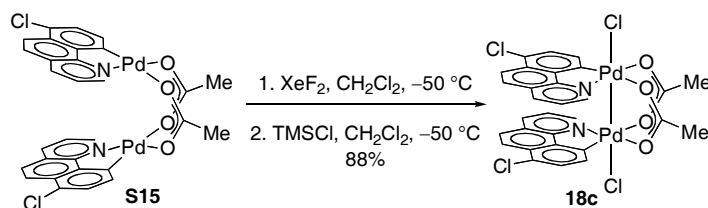

This reaction was carried out in a nitrogen-filled dry box.<sup>3</sup> To a suspension of 7-chlorobenzo[*h*]quinolinyl palladium acetate dimer (**S15**) (22.7 mg,  $3.00 \times 10^{-5}$  mol, 1.00 equiv) in  $\text{CH}_2\text{Cl}_2$  (1.5 mL) at  $-50\text{ }^\circ\text{C}$  was added  $\text{XeF}_2$  (5.1 mg,  $3.0 \times 10^{-5}$  mol, 1.0 equiv) in one portion. The reaction mixture was stirred for 10 minutes before  $\text{TMSCl}$  (7.80  $\mu\text{L}$ , 6.68 mg,  $6.15 \times 10^{-5}$  mol, 2.05 equiv) was added. The reaction mixture was stirred at  $-50\text{ }^\circ\text{C}$  for 5 minutes before solvent was removed in vacuo at  $-50\text{ }^\circ\text{C}$  to afford 21.8 mg of the title compound as a dark red solid (88% yield) in a 10:1 ratio of isomers (7-chlorobenzo[*h*]quinolinyl ligands head to tail vs. head to head).

$^1\text{H-NMR}$  (500 MHz,  $\text{CD}_2\text{Cl}_2$ ,  $-50\text{ }^\circ\text{C}$ ,  $\delta$ ): Major Isomer : 7.89–7.85 (m, 4H), 7.61 (d,  $J = 8.3$  Hz, 2H), 7.50 (d,  $J = 7.8$  Hz, 2H), 7.29 (d,  $J = 8.3$  Hz, 2H), 7.09 (d,  $J = 8.3$  Hz, 2H), 7.04 (dd,  $J = 5.4$  Hz,  $J = 5.4$  Hz, 2H), 2.69 (s, 6H). Minor Isomer : 2.62 (s, 6H). UV-VIS Spectroscopy ( $\text{CH}_2\text{Cl}_2$ ,  $0\text{ }^\circ\text{C}$ ): 612 nm ( $\epsilon = 2.64 \times 10^3\text{ M}^{-1}\text{ cm}^{-1}$ ); 498 nm ( $\epsilon = 6.17 \times 10^3\text{ M}^{-1}\text{ cm}^{-1}$ ); 422 nm ( $\epsilon = 2.64 \times 10^4\text{ M}^{-1}\text{ cm}^{-1}$ ).

### 7-Iodobenzo[*h*]quinolinyl chloro palladium(III) acetate dimer (18d)

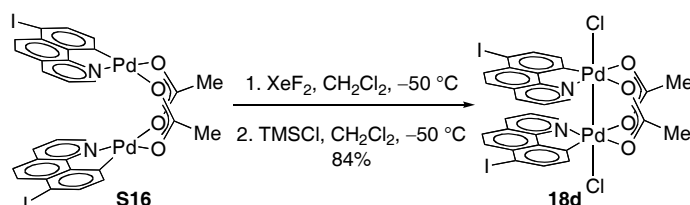

This reaction was carried out in a nitrogen-filled dry box.<sup>4</sup> To a suspension of 7-iodobenzo[*h*]quinolinyl palladium acetate dimer (**S16**) (18.1 mg,  $1.93 \times 10^{-5}$  mol, 1.00 equiv) in  $\text{CD}_2\text{Cl}_2$  (1.5 mL) at  $-50\text{ }^\circ\text{C}$  was added  $\text{XeF}_2$  (5.1 mg,  $3.0 \times 10^{-5}$  mol, 1.0 equiv) in one portion. The reaction mixture was stirred for 10 minutes before  $\text{TMSCl}$  (7.80  $\mu\text{L}$ , 6.68 mg,  $6.15 \times 10^{-5}$  mol, 2.05 equiv) was added. The reaction mixture was stirred at  $-50\text{ }^\circ\text{C}$  for 5 minutes before solvent was removed in vacuo at  $-50\text{ }^\circ\text{C}$  to afford 16.4 mg of the title compound as a dark red solid (84% yield) in a 15:1 ratio of isomers (7-iodobenzo[*h*]quinolinyl ligands head to tail vs. head to head). In solution, **18d** is both thermally and photochemically unstable;

<sup>3</sup> Oxidation was carried out with  $\text{XeF}_2$  in lieu of  $\text{PhICl}_2$  to simplify purification of **18c**.

<sup>4</sup> Oxidation was carried out with  $\text{XeF}_2$  in lieu of  $\text{PhICl}_2$  because the byproducts of oxidation with  $\text{XeF}_2$  do not overlap with the aromatic resonances of **18d**, which simplified analysis of the resulting  $^1\text{H}$  NMR spectrum.



characterization has been accomplished on unpurified samples of **18d** because we have been unable to handle **18d** for sufficient times to purify.

$^1\text{H-NMR}$  (500 MHz,  $\text{CD}_2\text{Cl}_2$ ,  $-50\text{ }^\circ\text{C}$ ,  $\delta$ ): Major Isomer : 7.89 (d,  $J = 4.9$  Hz, 2H), 7.83–7.80 (m, 4H), 7.33 (d,  $J = 8.8$  Hz, 2H), 7.19 (d,  $J = 9.3$  Hz, 2H), 7.03 (dd,  $J = 8.3$  Hz,  $J = 5.9$  Hz, 2H), 6.87 (d,  $J = 8.3$  Hz, 2H), 2.68 (s, 6H). Minor Isomer : 8.05 (d,  $J = 5.9$  Hz, 2H), 7.43 (d,  $J = 8.8$  Hz, 2H), 6.69 (d,  $J = 8.3$  Hz, 2H), 2.66 (s, 6H). UV-VIS Spectroscopy ( $\text{CH}_2\text{Cl}_2$ ,  $0\text{ }^\circ\text{C}$ ): 600 nm ( $\epsilon = 3.69 \times 10^3\text{ M}^{-1}\text{ cm}^{-1}$ ); 496 nm ( $\epsilon = 8.27 \times 10^3\text{ M}^{-1}\text{ cm}^{-1}$ ); 420 nm ( $\epsilon = 3.28 \times 10^4\text{ M}^{-1}\text{ cm}^{-1}$ ); 318 nm ( $\epsilon = 2.53 \times 10^4\text{ M}^{-1}\text{ cm}^{-1}$ ).

### 7-Methylbenzo[*h*]quinoliny chloro palladium(III) acetate dimer (**18e**)

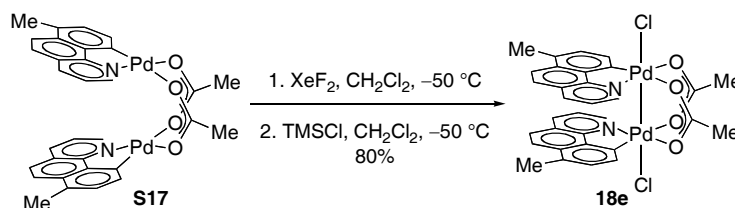

This reaction was carried out in a nitrogen-filled dry box.<sup>5</sup> To a suspension of 7-methylbenzo[*h*]quinoliny palladium acetate dimer (**S17**) (22.5 mg,  $3.15 \times 10^{-5}$  mol, 1.00 equiv) in  $\text{CH}_2\text{Cl}_2$  (1.5 mL) at  $-50\text{ }^\circ\text{C}$  was added  $\text{XeF}_2$  (5.3 mg,  $3.2 \times 10^{-5}$  mol, 1.0 equiv) in one portion. The reaction mixture was stirred for 10 minutes before  $\text{TMSCl}$  (8.20  $\mu\text{L}$ , 7.02 mg,  $6.46 \times 10^{-5}$  mol, 2.05 equiv) was added. The reaction mixture was stirred at  $-50\text{ }^\circ\text{C}$  for 5 minutes before solvent was removed in vacuo at  $-50\text{ }^\circ\text{C}$ . The resulting solid was triturated with pre-cooled  $\text{Et}_2\text{O}$  ( $-50\text{ }^\circ\text{C}$ ) to afford 19.8 mg of the title compound as a dark red solid (80% yield) in a 8:1 ratio of isomers (7-methylbenzo[*h*]quinoliny ligands head to tail vs. head to head).

$^1\text{H-NMR}$  (500 MHz,  $\text{CD}_2\text{Cl}_2$ ,  $23\text{ }^\circ\text{C}$ ,  $\delta$ ): Major Isomer : 7.75 (d,  $J = 4.9$  Hz, 2H), 7.67 (d,  $J = 7.8$  Hz, 2H), 7.38 (d,  $J = 8.8$  Hz, 2H), 7.27 (d,  $J = 7.8$  Hz, 2H), 7.13 (d,  $J = 8.8$  Hz, 2H), 7.05 (d,  $J = 8.3$  Hz, 2H), 6.77 (dd,  $J = 7.3$  Hz,  $J = 5.9$  Hz, 2H), 2.68 (s, 6H), 2.54 (s, 6H). Minor Isomer : 7.84 (d,  $J = 7.8$  Hz, 2H), 7.61 (d,  $J = 8.8$  Hz, 2H), 7.00 (d,  $J = 8.3$  Hz, 2H), 2.70 (s, 6H), 2.61 (s, 6H). UV-VIS Spectroscopy ( $\text{CH}_2\text{Cl}_2$ ,  $0\text{ }^\circ\text{C}$ ): 622 nm ( $\epsilon = 3.00 \times 10^3\text{ M}^{-1}\text{ cm}^{-1}$ ); 498 nm ( $\epsilon = 7.37 \times 10^3\text{ M}^{-1}\text{ cm}^{-1}$ ); 414 nm ( $\epsilon = 3.74 \times 10^4\text{ M}^{-1}\text{ cm}^{-1}$ ).

### 10-chlorobenzo[*h*]quinoline-7-carbaldehyde (**19b**)

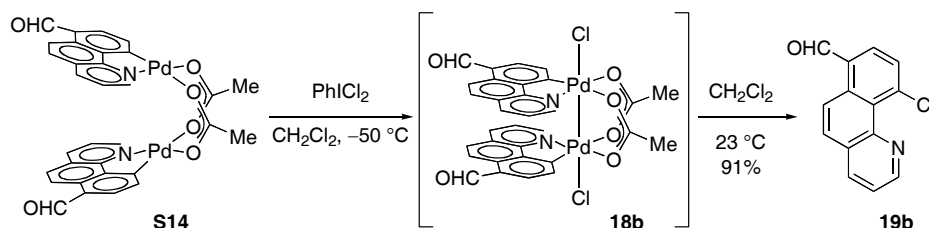

<sup>5</sup> Oxidation was carried out with  $\text{XeF}_2$  in lieu of  $\text{PhICl}_2$  to simplify purification of **18e**.

This reaction was carried out in a nitrogen-filled dry box. To a solution of 7-formylbenzo[*h*]quinolinyl palladium acetate dimer (**S14**) (44.2 mg,  $5.95 \times 10^{-5}$  mol, 1.00 equiv) in  $\text{CH}_2\text{Cl}_2$  (3.0 mL) at  $-50^\circ\text{C}$  was added  $\text{PhICl}_2$  (16.3 mg,  $5.95 \times 10^{-5}$  mol, 1.00 equiv) in one portion. The reaction mixture was stirred at  $-50^\circ\text{C}$  for 5 minutes before being warmed to  $23^\circ\text{C}$ , at which time the reaction mixture was stirred for 6 hours. Solvent was removed in vacuo and the residue was purified by chromatography on silica gel eluting with hexanes / EtOAc (6:1 (v/v)) to afford 13.1 mg of the title compound as a colorless solid (91% yield).

$R_f = 0.18$  (hexanes / EtOAc (9 / 1, v / v)).  $^1\text{H-NMR}$  (500 MHz,  $\text{CDCl}_3$ ,  $23^\circ\text{C}$ ,  $\delta$ ): 10.48 (s, 1H), 9.29 (d,  $J = 9.2$  Hz, 1H), 9.14 (d,  $J = 2.3$  Hz, 1H), 8.24 (d,  $J = 6.9$  Hz, 1H), 8.03 (d,  $J = 7.8$  Hz, 1H), 7.98 (d,  $J = 8.2$  Hz, 1H), 7.92 (d,  $J = 9.2$  Hz, 1H), 7.63 (dd,  $J = 7.8$  Hz, 4.1 Hz, 1H).  $^{13}\text{C-NMR}$  (125 MHz,  $\text{CDCl}_3$ ,  $23^\circ\text{C}$ ,  $\delta$ ): 192.35, 148.07, 145.95, 139.66, 135.64, 135.48, 134.59, 130.98, 129.94, 129.86, 128.01, 127.29, 123.05, 122.46. Mass Spectrometry: HRMS-FIA ( $m/z$ ): calcd for  $[\text{C}_{14}\text{H}_8\text{NOCl}+\text{H}]^+$ , 242.0367. Found, 242.0372.

### 7,10-dichlorobenzo[*h*]quinoline (**19c**)

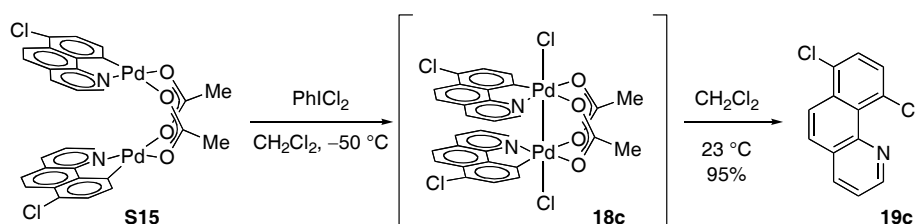

This reaction was carried out in a nitrogen-filled dry box. To a solution of 7-chlorobenzo[*h*]quinolinyl palladium acetate dimer (**S15**) (33.0 mg,  $4.36 \times 10^{-5}$  mol, 1.00 equiv) in  $\text{CH}_2\text{Cl}_2$  (3.0 mL) at  $-50^\circ\text{C}$  was added  $\text{PhICl}_2$  (12.0 mg,  $4.36 \times 10^{-5}$  mol, 1.00 equiv) in one portion. The reaction mixture was stirred at  $-50^\circ\text{C}$  for 5 minutes before being warmed to  $23^\circ\text{C}$ , at which time the reaction mixture was stirred for 6 hours. Solvent was removed in vacuo and the residue was purified by chromatography on silica gel eluting with hexanes / EtOAc (6:1 (v/v)) to afford 10.3 mg of the title compound as a colorless solid (95% yield).

$R_f = 0.41$  (hexanes / EtOAc (9 / 1, v / v)).  $^1\text{H-NMR}$  (500 MHz,  $\text{CDCl}_3$ ,  $23^\circ\text{C}$ ,  $\delta$ ): 9.14 (dd,  $J = 4.1$  Hz,  $J = 1.4$  Hz, 1H), 8.35 (d,  $J = 9.2$  Hz, 1H), 8.23 (dd,  $J = 8.2$  Hz,  $J = 1.8$  Hz, 1H), 7.84 (d,  $J = 9.2$  Hz, 1H), 7.75 (d,  $J = 8.2$  Hz, 1H), 7.67 (d,  $J = 8.2$  Hz, 1H), 7.61 (dd,  $J = 8.2$  Hz, 4.6 Hz, 1H).  $^{13}\text{C-NMR}$  (125 MHz,  $\text{CDCl}_3$ ,  $23^\circ\text{C}$ ,  $\delta$ ): 148.99, 146.18, 135.74, 132.99, 131.24, 131.12, 128.89, 128.16, 127.91, 127.41, 123.85, 122.31. Mass Spectrometry: LRMS-FIA ( $m/z$ ): calcd for  $[\text{C}_{13}\text{H}_7\text{NCl}_2+\text{H}]^+$ , 248.0028. Found, 248.0022.

**10-chloro-7-iodobenzo[*h*]quinoline (19d)**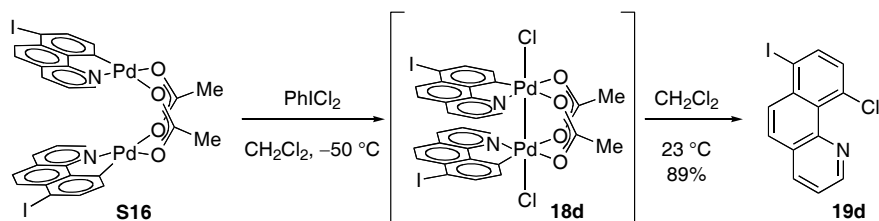

This reaction was carried out in a vial wrapped in electrical tape to exclude light and in a nitrogen-filled dry box. To a solution of 7-iodobenzo[*h*]quinolinyl palladium acetate dimer (**S16**) (35.5 mg,  $3.78 \times 10^{-5}$  mol, 1.00 equiv) in  $\text{CH}_2\text{Cl}_2$  (1.5 mL) at  $-50\text{ }^\circ\text{C}$  was added  $\text{PhICl}_2$  (10.4 mg,  $3.78 \times 10^{-5}$  mol, 1.00 equiv) in one portion. The reaction mixture was stirred at  $-50\text{ }^\circ\text{C}$  for 5 minutes before being warmed to  $23\text{ }^\circ\text{C}$ , at which time the reaction mixture was stirred for 6 hours. Solvent was removed in vacuo and the residue was purified by chromatography on silica gel eluting with hexanes / EtOAc (6:1 (v/v)) to afford 11.4 mg of the title compound as a colorless solid (89% yield). Compound **19d** gradually turns from colorless to red upon exposure to light and thus was stored in the dark.

$R_f = 0.41$  (hexanes / EtOAc (9 / 1, v / v)).  $^1\text{H-NMR}$  (500 MHz,  $\text{CDCl}_3$ ,  $23\text{ }^\circ\text{C}$ ,  $\delta$ ): 9.13 (dd,  $J = 4.1\text{ Hz}$ ,  $J = 1.4\text{ Hz}$ , 1H), 8.22 (dd,  $J = 8.2\text{ Hz}$ ,  $J = 1.8\text{ Hz}$ , 1H), 8.19 (d,  $J = 9.2\text{ Hz}$ , 1H), 8.15 (d,  $J = 8.2\text{ Hz}$ , 1H), 7.79 (d,  $J = 9.2\text{ Hz}$ , 1H), 7.59 (dd,  $J = 8.2\text{ Hz}$ ,  $J = 4.6\text{ Hz}$ , 1H), 7.54 (d,  $J = 8.2\text{ Hz}$ , 1H).  $^{13}\text{C-NMR}$  (125 MHz,  $\text{CDCl}_3$ ,  $23\text{ }^\circ\text{C}$ ,  $\delta$ ): 147.97, 146.13, 138.93, 136.42, 135.69, 133.57, 132.29, 132.22, 128.32, 127.27, 122.27, 110.67, 98.00. Mass Spectrometry: LRMS-FIA ( $m/z$ ): calcd for  $[\text{C}_{13}\text{H}_7\text{NI}+\text{H}]^+$ , 339.9385. Found, 339.9390.

**10-chloro-7-methylbenzo[*h*]quinoline (19e)**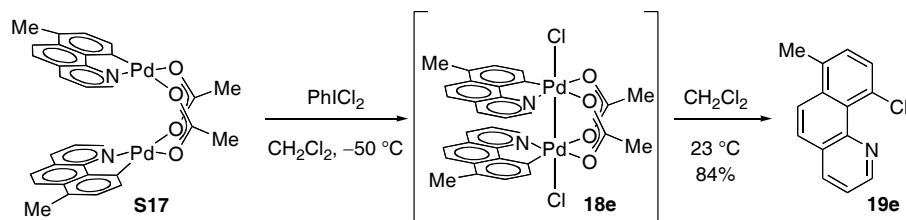

This reaction was carried out in a nitrogen-filled dry box. To a solution of 7-methylbenzo[*h*]quinolinyl palladium acetate dimer (**S17**) (19.2 mg,  $2.68 \times 10^{-5}$  mol, 1.00 equiv) in  $\text{CH}_2\text{Cl}_2$  (2.0 mL) at  $-50\text{ }^\circ\text{C}$  was added  $\text{PhICl}_2$  (7.4 mg,  $2.7 \times 10^{-5}$  mol, 1.0 equiv) in one portion. The reaction mixture was stirred at  $-50\text{ }^\circ\text{C}$  for 5 minutes before being warmed to  $23\text{ }^\circ\text{C}$ , at which time the reaction mixture was stirred for 6 hours. Solvent was removed in vacuo and the residue was purified by chromatography on silica gel eluting with hexanes / EtOAc (6:1 (v/v)) to afford 5.1 mg of the title compound as a colorless solid (84% yield).

$R_f = 0.32$  (hexanes / EtOAc (9 / 1, v / v)).  $^1\text{H-NMR}$  (500 MHz,  $\text{CDCl}_3$ ,  $23\text{ }^\circ\text{C}$ ,  $\delta$ ): 9.11 (dd,  $J = 4.4\text{ Hz}$ ,  $J = 2.0\text{ Hz}$ , 1H), 8.19 (dd,  $J = 8.3\text{ Hz}$ ,  $J = 1.9\text{ Hz}$ , 1H), 8.01 (d,  $J = 9.3\text{ Hz}$ , 1H), 7.75 (d,  $J = 9.3\text{ Hz}$ , 1H), 7.72 (d,  $J = 7.8\text{ Hz}$ , 1H), 7.56 (dd,  $J = 8.3\text{ Hz}$ ,  $J = 4.4\text{ Hz}$ , 1H), 7.43 (d,  $J = 7.8\text{ Hz}$ , 1H), 2.75 (s, 3H).  $^{13}\text{C-NMR}$

NMR (125 MHz,  $\text{CDCl}_3$ , 23 °C,  $\delta$ ): 147.51, 146.73, 135.49, 134.83, 133.63, 130.98, 130.17, 129.08, 127.57, 125.10, 126.36, 124.01, 121.66, 20.19. Mass Spectrometry: HRMS-FIA ( $m/z$ ): calcd for  $[\text{C}_{14}\text{H}_{10}\text{NCl}+\text{H}]^+$ , 228.0575. Found, 228.0585.

### Hammett Study Based on Benzo[*h*]quinolinylligand Substitution

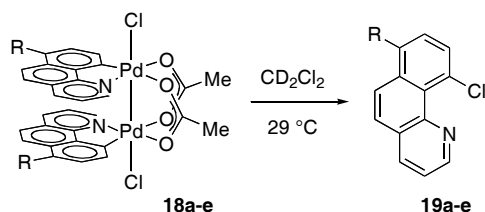

Stock solutions of compounds **9**, **S14**, **S15**, **S16**, and **S17** (22.0 mM) and  $\text{PhICl}_2$  (22.0 mM) were prepared in  $\text{CD}_2\text{Cl}_2$ . Samples were prepared by combining the appropriate palladium containing solution (200  $\mu\text{L}$ ),  $\text{PhICl}_2$  solution (200  $\mu\text{L}$ ), and  $\text{CD}_2\text{Cl}_2$  (300  $\mu\text{L}$ ) in a nitrogen-purged NMR tube.  $^1\text{H}$  NMR spectra were obtained; the evolution of compounds **19a-e** was monitored by the  $^1\text{H}$  NMR signals (R = H, 9.12 ppm; R = CHO, 9.14 ppm; R = Cl, 9.14 ppm; R = I, 9.13 ppm; R = Me, 9.11 ppm). These signals were integrated relative the residual proton signal from  $\text{CD}_2\text{Cl}_2$ . Time points were excluded for those spectra in which the monitored peak overlapped with other peaks. Since evolution of product was measured, linear natural log plots were obtained by using an infinite time point set to 100% yield. In each case, the reactions were followed to greater than 3 half-lives. Data were fitted to a first order regression; plots, slopes, and  $R^2$  values are reported below.

Formation of **19a** (R = H)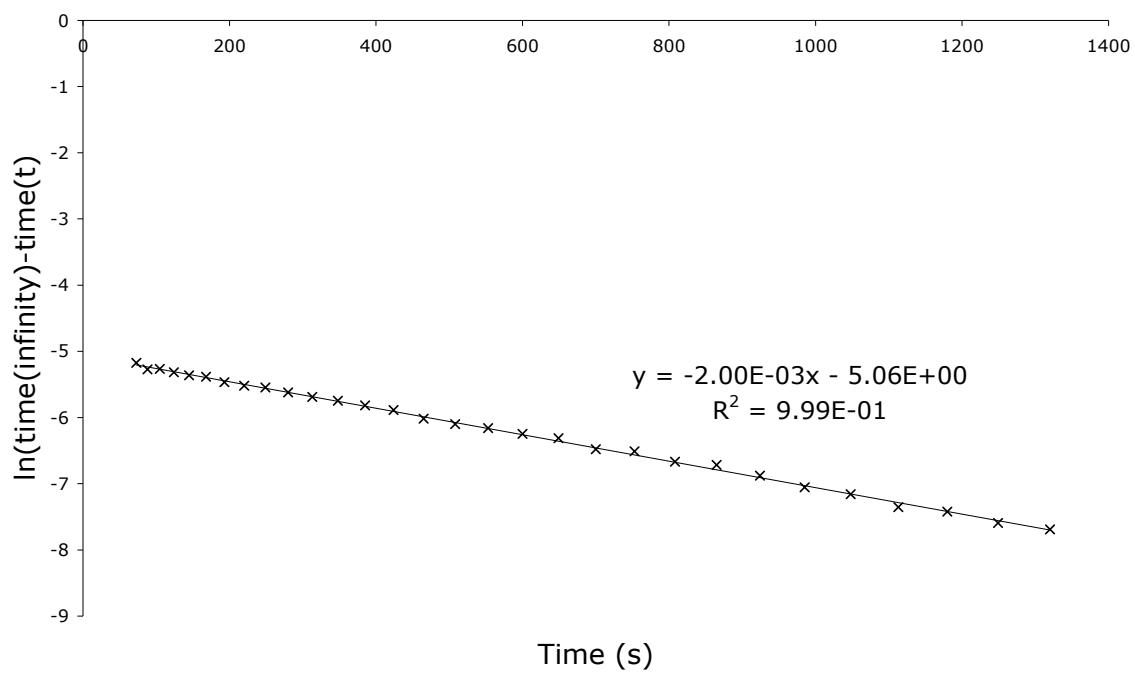Formation of **19b** (R = CHO)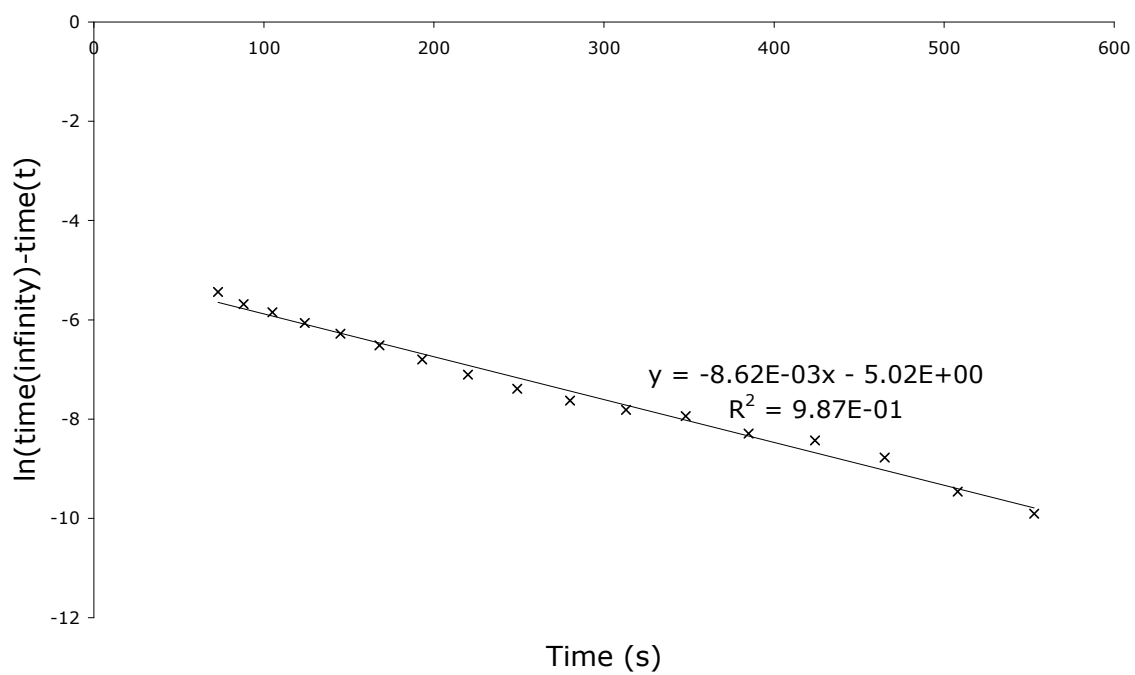

Formation of **19c** (R = Cl)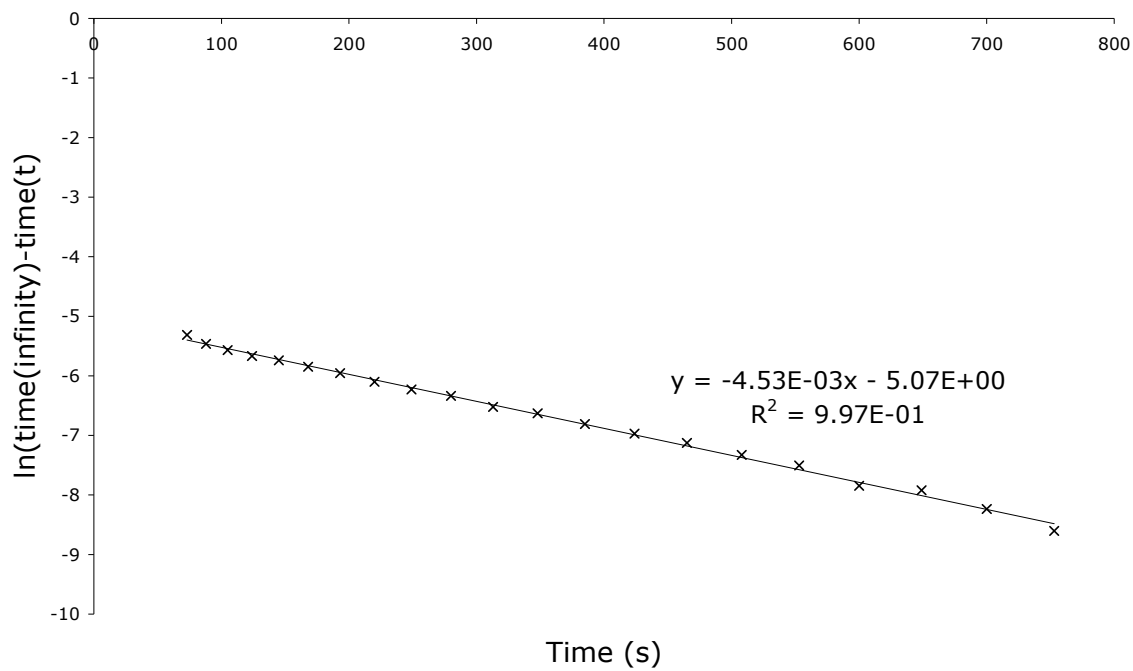Formation of **19d** (R = I)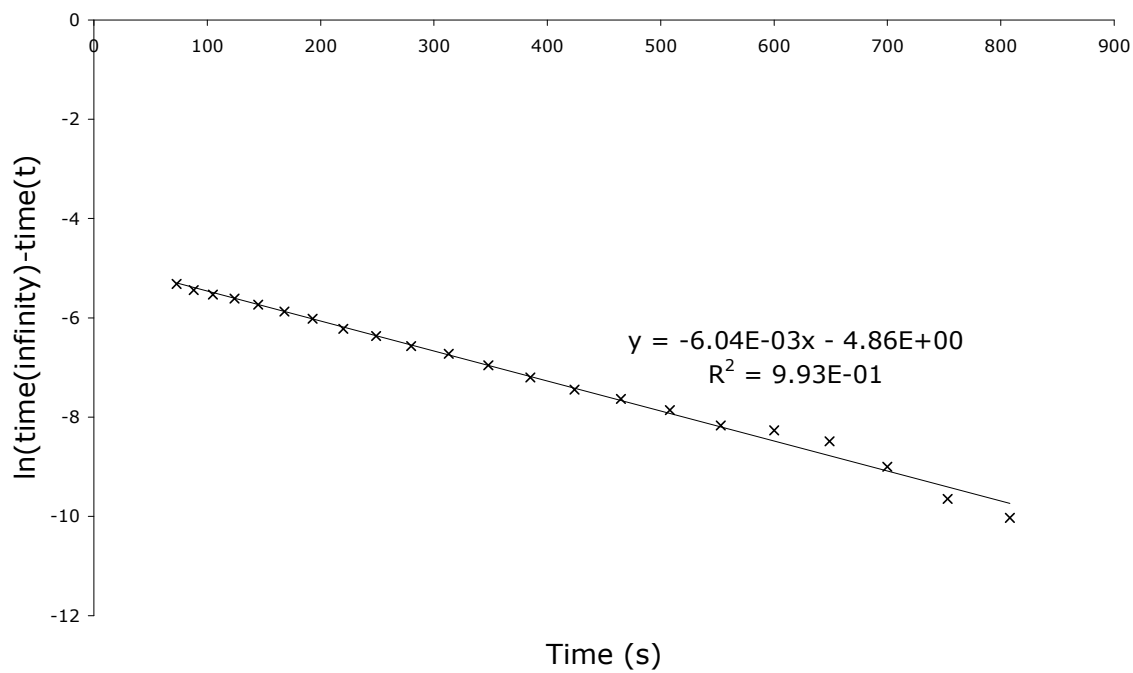

Formation of **19e** (R = Me)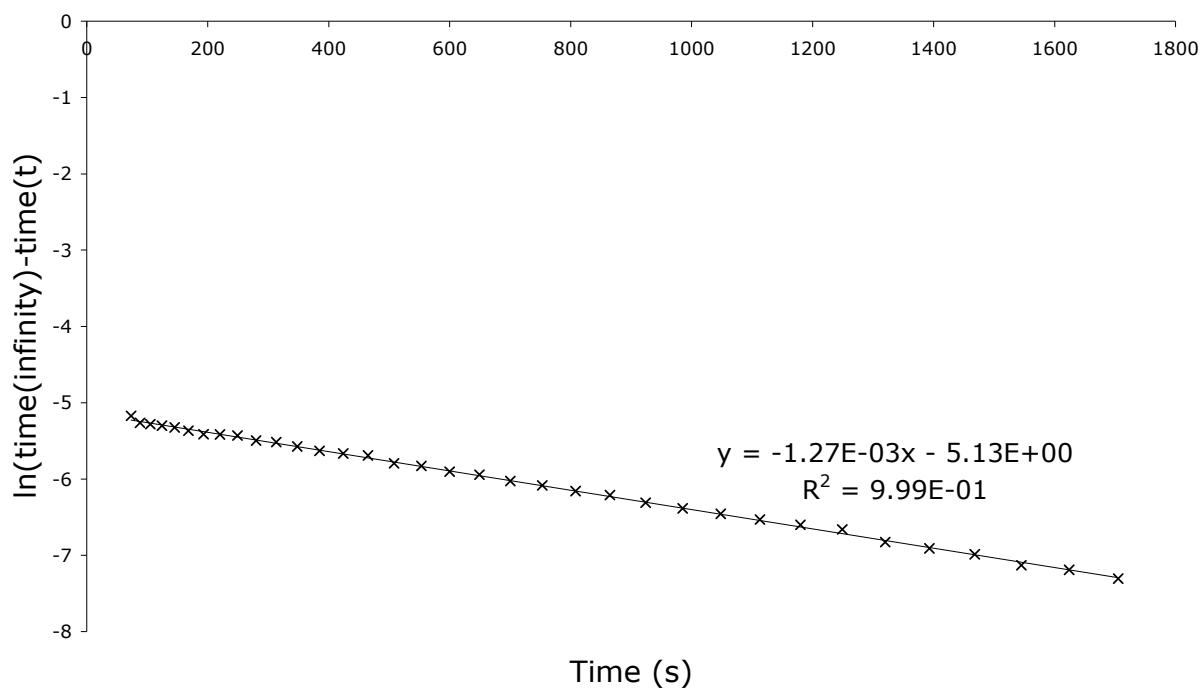

| <u>Substituent (R)</u> | <u><math>\sigma</math></u> | <u><math>k</math> (s<sup>-1</sup>)</u> |
|------------------------|----------------------------|----------------------------------------|
| CHO                    | 0.42                       | $8.62 \times 10^{-3}$                  |
| I                      | 0.276                      | $6.04 \times 10^{-3}$                  |
| Cl                     | 0.227                      | $4.53 \times 10^{-3}$                  |
| H                      | 0.0                        | $2.00 \times 10^{-3}$                  |
| CH <sub>3</sub>        | -0.17                      | $1.27 \times 10^{-3}$                  |

### Hammett Plot

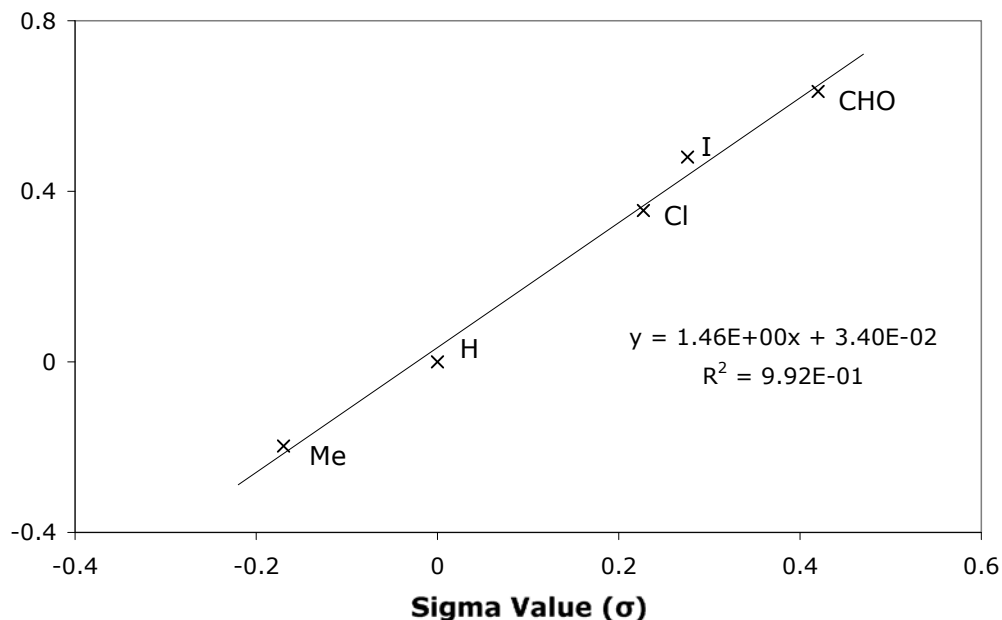

### Hammett Analysis Based on Substitution of Bridging Carboxylate Ligand (Data Pertaining to Figure 3)

#### Benzo[h]quinolinyl palladium benzoate dimer (S18)

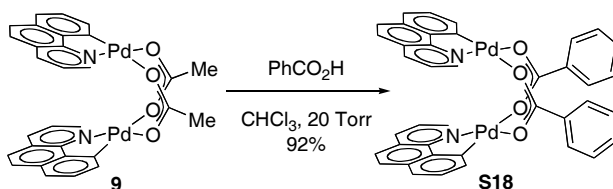

To a suspension of benzo[h]quinolinyl palladium acetate dimer (**9**) (306 mg, 0.445 mmol, 1.00 equiv) in  $\text{CHCl}_3$  (15 mL) at 23 °C was added benzoic acid (109 mg, 0.890 mmol, 2.00 equiv) and the reaction mixture was stirred at 23 °C for 1h. Solvent was removed in vacuo. The residue was taken up in  $\text{CHCl}_3$  (15 mL) and solvent was removed in vacuo four times, sequentially in order to remove all AcOH. The residue was triturated in  $\text{Et}_2\text{O}$  (10 mL) to afford 332 mg of the title compound as a yellow solid (92% yield) in a 20:1 ratio of isomers (benzo[h]quinolinyl ligands head to tail vs. head to head).

Melting Point: >250 °C.  $^1\text{H-NMR}$  (600 MHz,  $\text{CDCl}_3$ , 23 °C,  $\delta$ ): Major Isomer : 8.36 (d,  $J = 8.2$  Hz, 4H), 7.92 (d,  $J = 5.1$  Hz, 2H), 7.53 (ddd,  $J = 6.7$  Hz,  $J = 6.7$  Hz,  $J = 1.3$  Hz, 2H), 7.48–7.46 (m, 6H), 7.25 (d,  $J = 8.8$  Hz, 2H), 7.21 (t,  $J = 4.4$  Hz, 2H), 7.10 (d,  $J = 4.2$  Hz, 4H), 7.00 (d,  $J = 8.6$  Hz, 2H), 6.47 (dd,  $J = 8.1$  Hz,  $J = 5.3$  Hz, 2H). Minor Isomer: 8.18 (d,  $J = 5.6$  Hz, 2H), 7.72 (d,  $J = 7.9$  Hz, 2H), 7.03 (d,  $J = 8.6$  Hz, 2H), 6.97 (d,  $J = 6.9$  Hz, 2H). 6.87–6.81 (m, 4H).  $^{13}\text{C-NMR}$  (125 MHz,  $\text{CDCl}_3$ , 23 °C,  $\delta$ ): Major



Isomer: 176.16, 153.13, 148.92, 148.72, 139.81, 135.51, 135.07, 132.15, 131.32, 130.26, 128.88, 127.86, 127.69, 127.46, 124.76, 122.64, 121.75, 119.69. UV-VIS Spectroscopy ( $\text{CH}_2\text{Cl}_2$ , 23 °C): 377 nm ( $\epsilon = 4.54 \times 10^3 \text{ M}^{-1} \text{ cm}^{-1}$ ); 291 nm ( $\epsilon = 2.01 \times 10^4 \text{ M}^{-1} \text{ cm}^{-1}$ ); 273 nm ( $\epsilon = 2.26 \times 10^4 \text{ M}^{-1} \text{ cm}^{-1}$ ).

### Benzo[*h*]quinolinyll palladium *para*-fluorobenzoate dimer (S19)

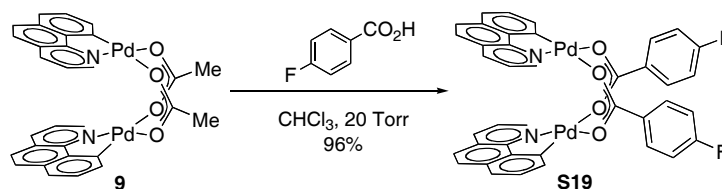

To a suspension of benzo[*h*]quinolinyll palladium acetate dimer (**9**) (300 mg, 0.436 mmol, 1.00 equiv) in  $\text{CHCl}_3$  (25 mL) at 23 °C was added *para*-fluorobenzoic acid (122 mg, 0.872 mmol, 2.00 equiv) and the reaction mixture was stirred at 23 °C for 1h. Solvent was removed in vacuo. The residue was taken up in  $\text{CHCl}_3$  (25 mL) and solvent was removed in vacuo four times, sequentially in order to remove all AcOH. The residue was triturated in  $\text{Et}_2\text{O}$  (10 mL) to afford 355 mg of the title compound as a yellow solid (96% yield) in a 16:1 ratio of isomers (benzo[*h*]quinolinyll ligands head to tail vs. head to head).

Melting Point: >250 °C.  $^1\text{H-NMR}$  (600 MHz,  $\text{CD}_2\text{Cl}_2$ , 23 °C,  $\delta$ ): Major Isomer : 8.36 (dd,  $J = 5.6 \text{ Hz}$ ,  $J = 2.1 \text{ Hz}$ , 4H), 7.88 (dd,  $J = 5.3 \text{ Hz}$ ,  $J = 1.3 \text{ Hz}$ , 2H), 7.47 (dd,  $J = 8.1 \text{ Hz}$ ,  $J = 1.2 \text{ Hz}$ , 2H), 7.26 (d,  $J = 8.6 \text{ Hz}$ , 2H), 7.22 (d,  $J = 7.9 \text{ Hz}$ , 2H), 7.14–7.10 (m, 6H), 7.04 (d,  $J = 7.2 \text{ Hz}$ , 2H), 7.01 (d,  $J = 8.6 \text{ Hz}$ , 2H), 6.47 (dd,  $J = 5.3 \text{ Hz}$ ,  $J = 1.2 \text{ Hz}$ , 2H). Minor Isomer : 8.38 (dd,  $J = 5.6 \text{ Hz}$ ,  $J = 2.1 \text{ Hz}$ , 4H), 8.14 (d,  $J = 5.1 \text{ Hz}$ , 2H), 7.73 (d,  $J = 7.9 \text{ Hz}$ , 2H), 7.44 (d,  $J = 8.1 \text{ Hz}$ ,  $J = 7.2 \text{ Hz}$ , 2H), 6.88 (dd,  $J = 7.9 \text{ Hz}$ ,  $J = 5.1 \text{ Hz}$ , 2H), 6.83 (dd,  $J = 7.6 \text{ Hz}$ ,  $J = 7.6 \text{ Hz}$ , 4H), 6.78 (d,  $J = 7.6 \text{ Hz}$ , 2H).  $^{13}\text{C-NMR}$  (125 MHz,  $\text{CDCl}_3$ , 23 °C,  $\delta$ ): Major Isomer: 175.48, 166.42, 164.42, 153.37, 149.04, 148.80, 140.10, 135.88, 132.76 (d,  $J = 9.2 \text{ Hz}$ ), 132.17, 129.00, 128.05, 127.88, 125.33, 123.29, 122.24, 120.34, 115.14 (d,  $J = 22.0 \text{ Hz}$ ). Minor Isomer: 147.43, 130.45, 120.60.  $^{19}\text{F-NMR}$  (375 MHz,  $\text{CDCl}_3$ , 23 °C,  $\delta$ ): -109.53. UV-VIS Spectroscopy ( $\text{CH}_2\text{Cl}_2$ , 23 °C): 377 nm ( $\epsilon = 3.63 \times 10^3 \text{ M}^{-1} \text{ cm}^{-1}$ ); 290 nm ( $\epsilon = 1.59 \times 10^4 \text{ M}^{-1} \text{ cm}^{-1}$ ).

### Benzo[*h*]quinolinyll palladium *para*-bromobenzoate dimer (S20)

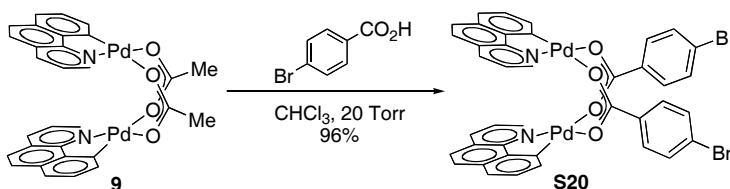

To a suspension of benzo[*h*]quinolinyll palladium acetate dimer (**9**) (209 mg, 0.304 mmol, 1.00 equiv) in  $\text{CHCl}_3$  (25 mL) at 23 °C was added *para*-bromobenzoic acid (122 mg, 0.608 mmol, 2.00 equiv) and the reaction mixture was stirred at 23 °C for 1h. Solvent was removed in vacuo. The residue was taken up in  $\text{CHCl}_3$  (50 mL) and solvent was removed in vacuo four times, sequentially in order to remove all AcOH. The residue was triturated in  $\text{Et}_2\text{O}$  (10 mL) to afford 262 mg of the title compound as a yellow solid (96%

yield) in a 26:1 ratio of isomers (benzo[*h*]quinolinyl ligands head to tail vs. head to head).

Melting Point: >250 °C. <sup>1</sup>H-NMR (600 MHz, CDCl<sub>3</sub>, 23 °C, δ): Major Isomer : 8.21 (d, *J* = 8.3 Hz, 4H), 7.86 (d, *J* = 5.3 Hz, 2H), 7.60 (d, *J* = 8.5 Hz, 4H), 7.48 (d, *J* = 8.2 Hz, 2H), 7.26 (d, *J* = 8.6 Hz, 2H), 7.22 (d, *J* = 7.9 Hz, 2H), 7.10 (dd, *J* = 7.5 Hz, *J* = 7.5 Hz, 2H), 7.02–7.00 (m, 4H), 6.48 (dd, *J* = 7.9 Hz, *J* = 5.1 Hz, 2H). Minor Isomer : 8.11 (d, *J* = 5.5 Hz, 2H), 7.74 (d, *J* = 5.3 Hz, 2H). Compound **S22** is insufficiently soluble in organic solvents which do not displace a bridging acetate for <sup>13</sup>C-NMR to be obtained. UV-VIS Spectroscopy (CH<sub>2</sub>Cl<sub>2</sub>, 23 °C): 376 nm (ε = 4.22 × 10<sup>3</sup> M<sup>-1</sup> cm<sup>-1</sup>); 293 nm (ε = 1.82 × 10<sup>4</sup> M<sup>-1</sup> cm<sup>-1</sup>).

### Benzo[*h*]quinolinyl palladium *para*-acetylbenzoate dimer (**S21**)

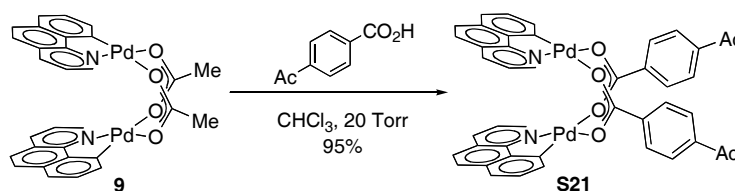

To a suspension of benzo[*h*]quinolinyl palladium acetate dimer **9** (347 mg, 0.505 mmol, 1.00 equiv) in CHCl<sub>3</sub> (25 mL) at 23 °C was added *para*-acetylbenzoic acid (166 mg, 1.01 mmol, 2.00 equiv) and the reaction mixture was stirred at 23 °C for 1h. Solvent was removed in vacuo. The residue was taken up in CHCl<sub>3</sub> (50 mL) and solvent was removed in vacuo four times, sequentially in order to remove all AcOH. The residue was triturated in Et<sub>2</sub>O (10 mL) to afford 430 mg of the title compound as a yellow solid (95% yield) in a 27:1 ratio of isomers (benzo[*h*]quinolinyl ligands head to tail vs. head to head).

Melting Point: >250 °C. <sup>1</sup>H-NMR (600 MHz, CD<sub>2</sub>Cl<sub>2</sub>, 23 °C, δ): Major Isomer : 8.43 (d, *J* = 8.2 Hz, 4H), 8.05 (d, *J* = 8.1 Hz, 4H), 7.88 (d, *J* = 5.1 Hz, 2H), 7.48 (d, *J* = 7.9 Hz, 2H), 7.27 (d, *J* = 8.9 Hz, 2H), 7.23 (d, *J* = 7.8 Hz, 2H), 7.11 (dd, *J* = 7.5 Hz, *J* = 7.5 Hz, 2H), 7.03–7.01 (m, 4H), 6.44 (dd, *J* = 7.9 Hz, *J* = 5.1 Hz, 2H), 2.67 (s, 6H). Minor Isomer : 8.46 (d, *J* = 8.2 Hz, 4H), 8.08 (d, *J* = 7.9 Hz, 4H), 7.75 (d, *J* = 5.7 Hz, 2H), 6.90–6.87 (m, 4H), 6.82 (dd, *J* = 7.2 Hz, *J* = 7.2 Hz, 2H), 6.75 (d, *J* = 7.3 Hz, 2H). <sup>13</sup>C-NMR (125 MHz, CD<sub>2</sub>Cl<sub>2</sub>, 23 °C, δ): Major Isomer: 198.04, 149.05, 139.69, 135.95, 132.81, 130.56, 129.01, 128.30, 127.93, 123.37, 122.55, 120.48. UV-VIS Spectroscopy (CH<sub>2</sub>Cl<sub>2</sub>, 23 °C): 377 nm (ε = 4.61 × 10<sup>3</sup> M<sup>-1</sup> cm<sup>-1</sup>); 290 nm (ε = 2.71 × 10<sup>4</sup> M<sup>-1</sup> cm<sup>-1</sup>).

### Benzo[*h*]quinolinyl palladium *para*-nitrobenzoate dimer (**S22**)

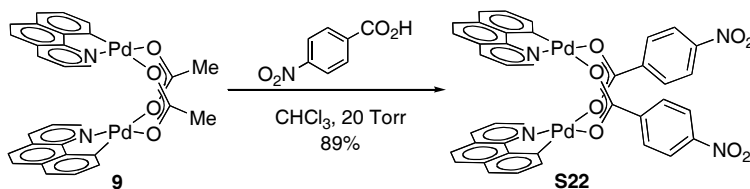

To a suspension of benzo[*h*]quinolinyl palladium acetate dimer (**9**) (182 mg, 0.265 mmol, 1.00 equiv) in

CHCl<sub>3</sub> (10 mL) at 23 °C was added *para*-nitrobenzoic acid (88.6 mg, 0.530 mmol, 2.00 equiv) and the reaction mixture was stirred at 23 °C for 1h. Solvent was removed in vacuo. The residue was taken up in CHCl<sub>3</sub> (20 mL) and solvent was removed in vacuo four times, sequentially in order to remove all AcOH. The residue was triturated in Et<sub>2</sub>O (10 mL) to afford 213 mg of the title compound as a yellow solid (89% yield). A single isomer (benzo[*h*]quinolinyl ligands head to tail) was observed by <sup>1</sup>H NMR.

Melting Point: >250 °C. <sup>1</sup>H-NMR (500 MHz, CD<sub>2</sub>Cl<sub>2</sub>, 23 °C, δ): Major Isomer : 8.47 (d, *J* = 8.7 Hz, 4H), 8.32 (d, *J* = 8.7 Hz, 4H), 7.83 (d, *J* = 5.0 Hz, 2H), 7.55 (d, *J* = 7.8 Hz, 2H), 7.31 (d, *J* = 8.7 Hz, 2H), 7.27 (d, *J* = 8.2 Hz, 2H), 7.11 (dd, *J* = 7.3 Hz, *J* = 7.3 Hz, 2H), 7.07 (d, *J* = 8.7 Hz, 2H), 6.95 (d, *J* = 7.3 Hz, 2H), 6.53 (dd, *J* = 8.2 Hz, *J* = 5.5 Hz, 2H). Compound **S24** is insufficiently soluble in organic solvents which do not displace a bridging acetate for <sup>13</sup>C-NMR to be obtained. UV-VIS Spectroscopy (CH<sub>2</sub>Cl<sub>2</sub>, 23 °C): 375 nm (ε = 4.82 × 10<sup>3</sup> M<sup>-1</sup> cm<sup>-1</sup>); 272 nm (ε = 4.60 × 10<sup>4</sup> M<sup>-1</sup> cm<sup>-1</sup>).

### Benzo[*h*]quinolinyl chloro palladium(III) benzoate dimer (**20a**)

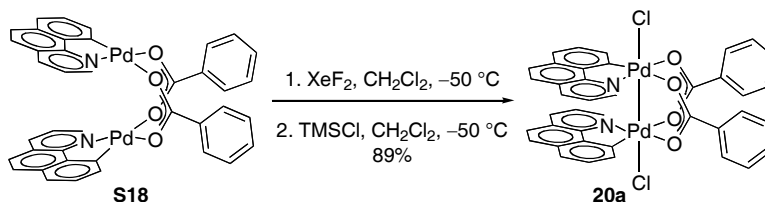

This reaction was carried out in a nitrogen-filled dry box. To a suspension of benzo[*h*]quinolinyl palladium benzoate dimer (**S18**) (12.0 mg, 1.48 × 10<sup>-5</sup> mol, 1.00 equiv) in CH<sub>2</sub>Cl<sub>2</sub> (1.0 mL) at -50 °C was added XeF<sub>2</sub> (2.5 mg, 1.5 × 10<sup>-5</sup> mol, 1.0 equiv) in one portion. After stirring at -50 °C for 10 minutes, TMSCl (3.9 μL, 3.0 × 10<sup>-5</sup> mol, 2.1 equiv) was added. After stirring for 10 minutes, solvent was removed in vacuo and the residue was triturated with Et<sub>2</sub>O (1 × 1 mL) to afford 11.6 mg of the title compound as a dark red solid (89% yield) as a 14 : 1 mixture of isomers (benzo[*h*]quinolinyl ligand head-to-tail versus head-to-head). Upon isolation as a solid, compound **20a** would not redissolve in any common organic solvent and thus **20a** was characterized by <sup>1</sup>H NMR and UV-vis without removal of solvent or purification of the reaction mixture.

<sup>1</sup>H-NMR (500 MHz, CD<sub>2</sub>Cl<sub>2</sub>, 23 °C, δ): Major Isomer : 8.44, (d, *J* = 6.8 Hz, 4H), 7.88 (d, *J* = 5.4 Hz, 2H), 7.72 (d, *J* = 7.3 Hz, 2H), 7.69 (d, *J* = 7.8 Hz, 2H), 7.57 (dd, *J* = 7.8 Hz, *J* = 7.8 Hz, 4H), 7.41–7.34 (m, 6H), 7.20 (d, *J* = 8.8 Hz, 2H), 7.14 (d, *J* = 7.8 Hz, 2H), 6.81 (dd, *J* = 7.8 Hz, *J* = 5.9 Hz, 2H). Minor Isomer : 8.48 (d, *J* = 6.8 Hz, 4H), 8.07 (d, *J* = 7.8 Hz, 2H), 7.50 (dd, *J* = 7.8 Hz, *J* = 7.8 Hz, 4H), 7.31 (d, *J* = 5.0, 2H), 6.90 (d, *J* = 7.8 Hz, 2H). UV-VIS Spectroscopy (CH<sub>2</sub>Cl<sub>2</sub>, 0 °C): 586 nm (ε = 9.34 × 10<sup>2</sup> M<sup>-1</sup> cm<sup>-1</sup>); 496 nm (ε = 2.17 × 10<sup>3</sup> M<sup>-1</sup> cm<sup>-1</sup>); 418 nm (ε = 7.78 × 10<sup>3</sup> M<sup>-1</sup> cm<sup>-1</sup>).

**Benzo[*h*]quinolinyll chloro palladium(III) *para*-fluorobenzoate dimer (20b)**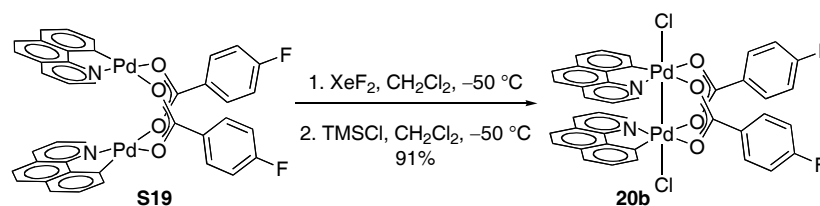

This reaction was carried out in a nitrogen-filled dry box. To a suspension of benzo[*h*]quinolinyll palladium *para*-fluorobenzoate dimer (**S19**) (15.5 mg,  $1.83 \times 10^{-5}$  mol, 1.00 equiv) in  $\text{CH}_2\text{Cl}_2$  (1.0 mL) at  $-50^\circ\text{C}$  was added  $\text{XeF}_2$  (3.1 mg,  $1.83 \times 10^{-5}$  mol, 1.00 equiv) in one portion. After stirring at  $-50^\circ\text{C}$  for 10 minutes,  $\text{TMSCl}$  (4.8  $\mu\text{L}$ ,  $3.75 \times 10^{-5}$  mol, 2.05 equiv) was added. After stirring for 10 minutes, solvent was removed in vacuo and the residue was triturated with  $\text{Et}_2\text{O}$  ( $1 \times 1$  mL) to afford 15.3 mg of the title compound as a dark red solid (91% yield) as a 15 : 1 ratio of isomers (benzo[*h*]quinolinyll ligand head-to-tail versus head-to-head). Upon isolation as a solid, compound **20b** would not redissolve in any common organic solvent and thus **20b** was characterized by  $^1\text{H}$  NMR and UV-vis without removal of solvent or purification of the reaction mixture.

$^1\text{H}$ -NMR (500 MHz,  $\text{CD}_2\text{Cl}_2$ ,  $-50^\circ\text{C}$ ,  $\delta$ ): Major Isomer : 8.47 (dd,  $J = 8.8$  Hz,  $J = 5.9$  Hz, 4H), 7.85 (d,  $J = 5.4$  Hz, 2H), 7.71–7.68 (m, 2H), 7.40–7.33 (m, 6H), 7.25 (dd,  $J = 8.8$  Hz,  $J = 8.8$  Hz, 4H), 7.19 (d,  $J = 8.8$  Hz, 2H), 7.12 (d,  $J = 8.8$  Hz, 2H), 6.80 (dd,  $J = 8.3$  Hz,  $J = 5.9$  Hz, 2H). Minor Isomer : 8.10 (d,  $J = 5.9$  Hz, 2H), 6.87 (d,  $J = 7.8$  Hz, 2H). UV-VIS Spectroscopy ( $\text{CH}_2\text{Cl}_2$ ,  $0^\circ\text{C}$ ): 590 nm ( $\epsilon = 1.91 \times 10^3 \text{ M}^{-1} \text{ cm}^{-1}$ ); 492 nm ( $\epsilon = 4.61 \times 10^3 \text{ M}^{-1} \text{ cm}^{-1}$ ); 418 nm ( $\epsilon = 1.54 \times 10^4 \text{ M}^{-1} \text{ cm}^{-1}$ ).

**Benzo[*h*]quinolinyll chloro palladium(III) *para*-bromobenzoate dimer (20c)**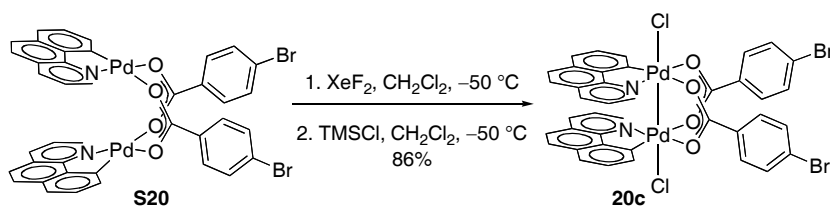

This reaction was carried out in a nitrogen-filled dry box. To a suspension of benzo[*h*]quinolinyll palladium *para*-bromobenzoate dimer (**S20**) (11.8 mg,  $1.22 \times 10^{-5}$  mol, 1.00 equiv) in  $\text{CH}_2\text{Cl}_2$  (1.0 mL) at  $-50^\circ\text{C}$  was added  $\text{XeF}_2$  (2.1 mg,  $1.2 \times 10^{-5}$  mol, 1.0 equiv) in one portion. After stirring at  $-50^\circ\text{C}$  for 10 minutes,  $\text{TMSCl}$  (3.2  $\mu\text{L}$ ,  $2.5 \times 10^{-5}$  mol, 2.1 equiv) was added. After stirring for 10 minutes, solvent was removed in vacuo and the residue was triturated with  $\text{Et}_2\text{O}$  ( $1 \times 1$  mL) to afford 10.9 mg of the title compound as a dark red solid (86% yield) as a single isomer. Upon isolation as a solid, compound **20c** would not redissolve in any common organic solvent and thus **20c** was characterized by  $^1\text{H}$  NMR and UV-vis without removal of solvent or purification of the reaction mixture.

$^1\text{H}$ -NMR (500 MHz,  $\text{CD}_2\text{Cl}_2$ ,  $-50^\circ\text{C}$ ,  $\delta$ ): 8.32 (d,  $J = 7.8$  Hz, 2H), 7.83 (br s, 2H), 7.72–7.70 (m, 6H), 7.38–7.33 (m, 6H), 7.17 (d,  $J = 8.3$  Hz, 2H), 7.08 (d,  $J = 7.3$  Hz, 2H), 6.80 (br s, 2H). UV-VIS

Spectroscopy (CH<sub>2</sub>Cl<sub>2</sub>, 0 °C): 590 nm ( $\epsilon = 3.02 \times 10^3 \text{ M}^{-1} \text{ cm}^{-1}$ ); 500 nm ( $\epsilon = 6.72 \times 10^3 \text{ M}^{-1} \text{ cm}^{-1}$ ); 418 nm ( $\epsilon = 2.53 \times 10^4 \text{ M}^{-1} \text{ cm}^{-1}$ ).

### Benzo[*h*]quinolinyll chloro palladium(III) *para*-acetylbenzoate dimer (20d)

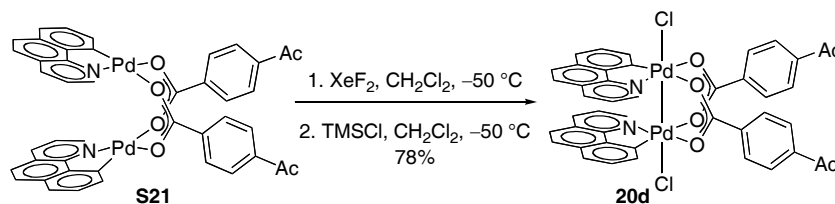

This reaction was carried out in a nitrogen-filled dry box. To a suspension of benzo[*h*]quinolinyll palladium *para*-acetylbenzoate dimer (**S21**) (16.4 mg,  $1.83 \times 10^{-5}$  mol, 1.00 equiv) in CH<sub>2</sub>Cl<sub>2</sub> (1.0 mL) at  $-50^\circ\text{C}$  was added XeF<sub>2</sub> (3.1 mg,  $1.8 \times 10^{-5}$  mol, 1.0 equiv) in one portion. After stirring at  $-50^\circ\text{C}$  for 10 minutes, TMSCl (4.8  $\mu\text{L}$ ,  $3.8 \times 10^{-5}$  mol, 2.1 equiv) was added. After stirring for 10 minutes, solvent was removed in vacuo and the residue was triturated with Et<sub>2</sub>O (1  $\times$  1 mL) to afford 13.8 mg of the title compound as a dark red solid (78% yield). Upon isolation as a solid, compound **19d** would not redissolve in any common organic solvent and thus **20d** was characterized by <sup>1</sup>H NMR and UV-vis without removal of solvent or purification of the reaction mixture.

<sup>1</sup>H-NMR (500 MHz, CD<sub>2</sub>Cl<sub>2</sub>,  $-50^\circ\text{C}$ ,  $\delta$ ): Major Isomer : 8.53 (d,  $J = 8.3$  Hz, 4H), 8.16 (d,  $J = 8.8$  Hz, 4H), 7.84 (br s, 2H), 7.66 (d,  $J = 7.3$  Hz, 2H), 7.41–7.29 (m, 6H), 7.12 (d,  $J = 8.8$  Hz, 2H), 7.09 (d,  $J = 7.3$  Hz, 2H), 6.79 (br s, 2H), 2.69 (s, 6H). Minor Isomer : 7.98 (d,  $J = 8.8$  Hz, 4H), 7.49 (dd,  $J = 7.8$  Hz,  $J = 7.8$  Hz, 2H), 7.023 (d,  $J = 7.3$  Hz, 2H), 2.62 (s, 6H). UV-VIS Spectroscopy (CH<sub>2</sub>Cl<sub>2</sub>, 0 °C): 596 nm ( $\epsilon = 3.10 \times 10^3 \text{ M}^{-1} \text{ cm}^{-1}$ ); 494 nm ( $\epsilon = 7.03 \times 10^3 \text{ M}^{-1} \text{ cm}^{-1}$ ); 420 nm ( $\epsilon = 2.25 \times 10^4 \text{ M}^{-1} \text{ cm}^{-1}$ ).

### Benzo[*h*]quinolinyll chloro palladium(III) *para*-nitrobenzoate dimer (20e)

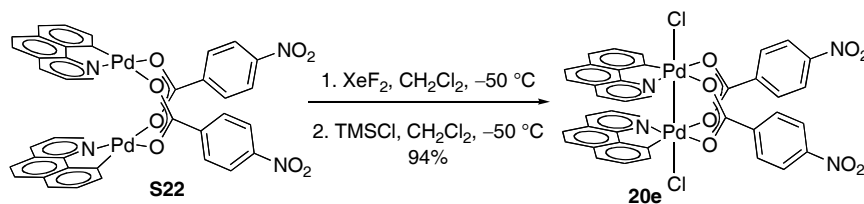

This reaction was carried out in a nitrogen-filled dry box. To a suspension of benzo[*h*]quinolinyll palladium *para*-nitrobenzoate dimer (**S22**) (12.8 mg,  $1.42 \times 10^{-5}$  mol, 1.00 equiv) in CH<sub>2</sub>Cl<sub>2</sub> (1.0 mL) at  $-50^\circ\text{C}$  was added XeF<sub>2</sub> (2.4 mg,  $1.4 \times 10^{-5}$  mol, 1.0 equiv) in one portion. After stirring at  $-50^\circ\text{C}$  for 10 minutes, TMSCl (3.6  $\mu\text{L}$ ,  $1.5 \times 10^{-5}$  mol, 2.1 equiv) was added. After stirring for 10 minutes, solvent was removed in vacuo and the residue was triturated with Et<sub>2</sub>O (1  $\times$  1 mL) to afford 13.0 mg of the title compound as a dark red solid (94% yield). Upon isolation as a solid, compound **20e** would not redissolve in any common organic solvent and thus **20e** was characterized by <sup>1</sup>H NMR and UV-vis without removal of solvent or purification of the reaction mixture.

$^1\text{H-NMR}$  (500 MHz,  $\text{CD}_2\text{Cl}_2$ ,  $-50\text{ }^\circ\text{C}$ ,  $\delta$ ): Major Isomer : 8.64 (d,  $J = 8.3$  Hz, 2H), 8.40 (d,  $J = 8.8$  Hz, 2H), 8.32 (d,  $J = 8.8$  Hz, 2H), 8.26 (d,  $J = 9.1$  Hz, 2H), 7.87 (d,  $J = 5.4$  Hz, 2H), 7.78 (d,  $J = 7.8$  Hz, 2H), 7.46–7.37 (m, 6H), 7.25 (d,  $J = 8.3$  Hz, 2H), 7.09 (d,  $J = 7.3$  Hz, 2H), 7.86 (dd,  $J = 7.8$  Hz,  $J = 5.0$  Hz, 2H). UV-VIS Spectroscopy ( $\text{CH}_2\text{Cl}_2$ ,  $0\text{ }^\circ\text{C}$ ): 600 nm ( $\epsilon = 1.28 \times 10^3\text{ M}^{-1}\text{ cm}^{-1}$ ); 500 nm ( $\epsilon = 2.98 \times 10^3\text{ M}^{-1}\text{ cm}^{-1}$ ); 422 nm ( $\epsilon = 1.14 \times 10^4\text{ M}^{-1}\text{ cm}^{-1}$ ).

### Hammett Study Based on Bridging Benzoate Substitution

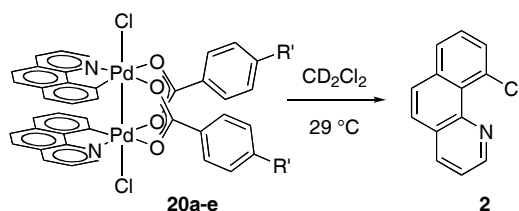

10-Chlorobenzo[*h*]quinoline (**2**) was observed upon warming solutions of compounds **20a-e** to  $23\text{ }^\circ\text{C}$ . Yields were as follows: from **20a**, 91%; from **20b**, 94%; from **20c**, 92%; from **20d**, 96%; and from **20e**, 91%. The rate of formation of 10-chlorobenzo[*h*]quinoline (**2**) was determined by the following procedure. Stock solutions of compounds **S18–22** (22.0 mM) and  $\text{PhICl}_2$  (44.0 mM) were prepared in  $\text{CD}_2\text{Cl}_2$ . Samples were prepared by combining the relevant compound (**S18–22**) solution (200  $\mu\text{L}$ ),  $\text{PhICl}_2$  solution (100  $\mu\text{L}$ ), and  $\text{CD}_2\text{Cl}_2$  (400  $\mu\text{L}$ ) in a nitrogen-purged NMR tube.  $^1\text{H}$  NMR spectra were obtained; the evolution of compound **2** was monitored by the  $^1\text{H}$  NMR signal at 9.12 ppm. These signals were integrated relative the residual proton signal from  $\text{CD}_2\text{Cl}_2$ . Time points were excluded for those spectra in which the monitored peak overlapped with other peaks. Since evolution of product was measured, linear natural log plots were obtained by using an infinite time point set to 100% yield. In each case, the reactions were followed to greater than 3 half-lives. Data were fitted to a first order regression; plots, slopes, and  $R^2$  values are reported below.

Formation of **2** from **20a** (R = H)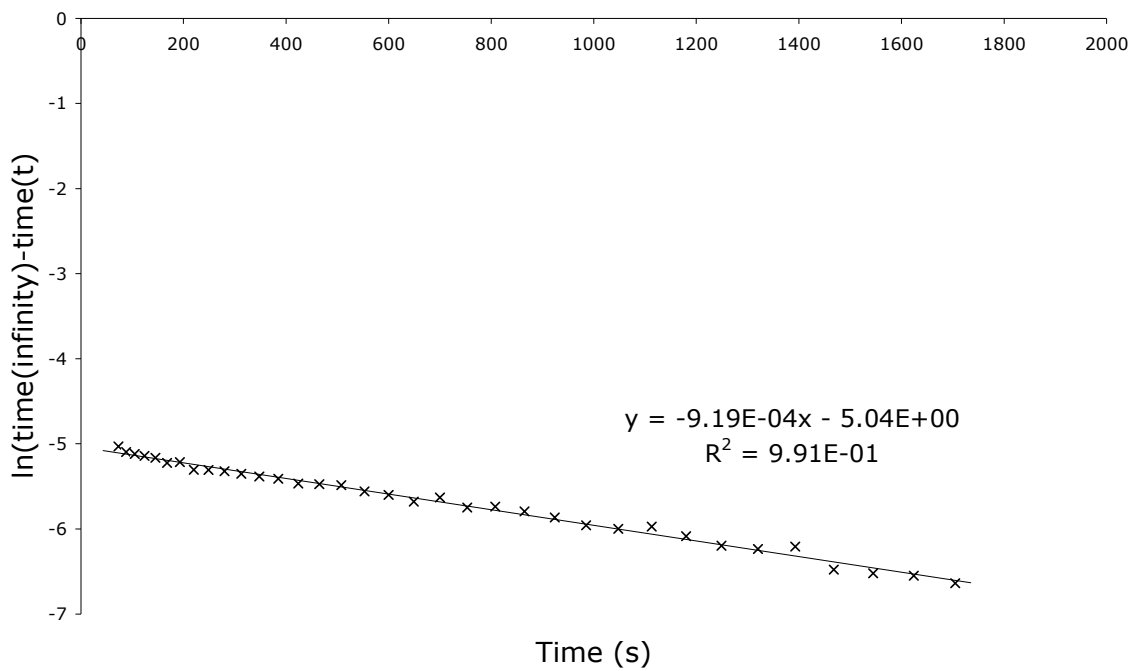Formation of **2** from **20b** (R = F)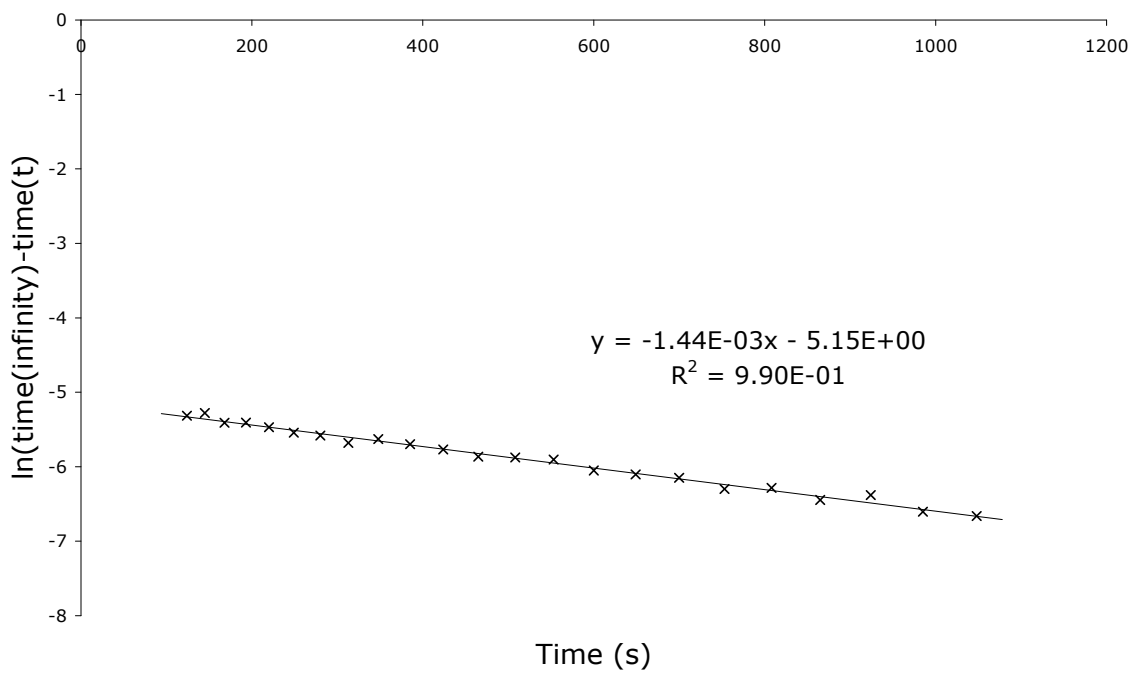

Formation of **2** from **20c** (R = Br)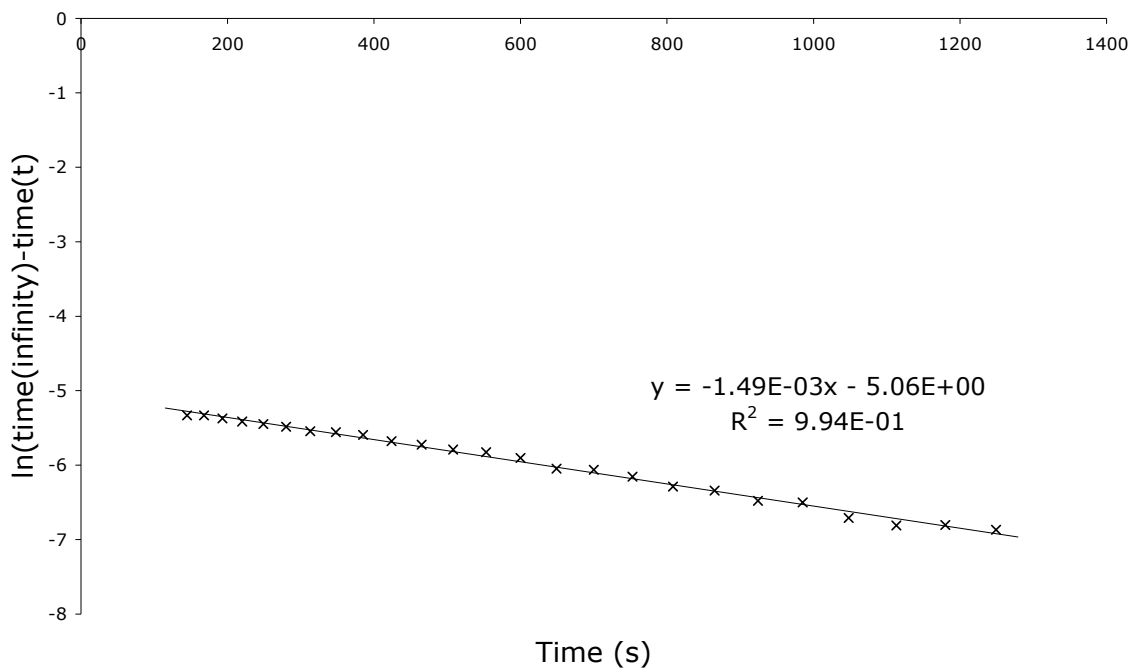Formation of **2** from **20d** (R = Ac)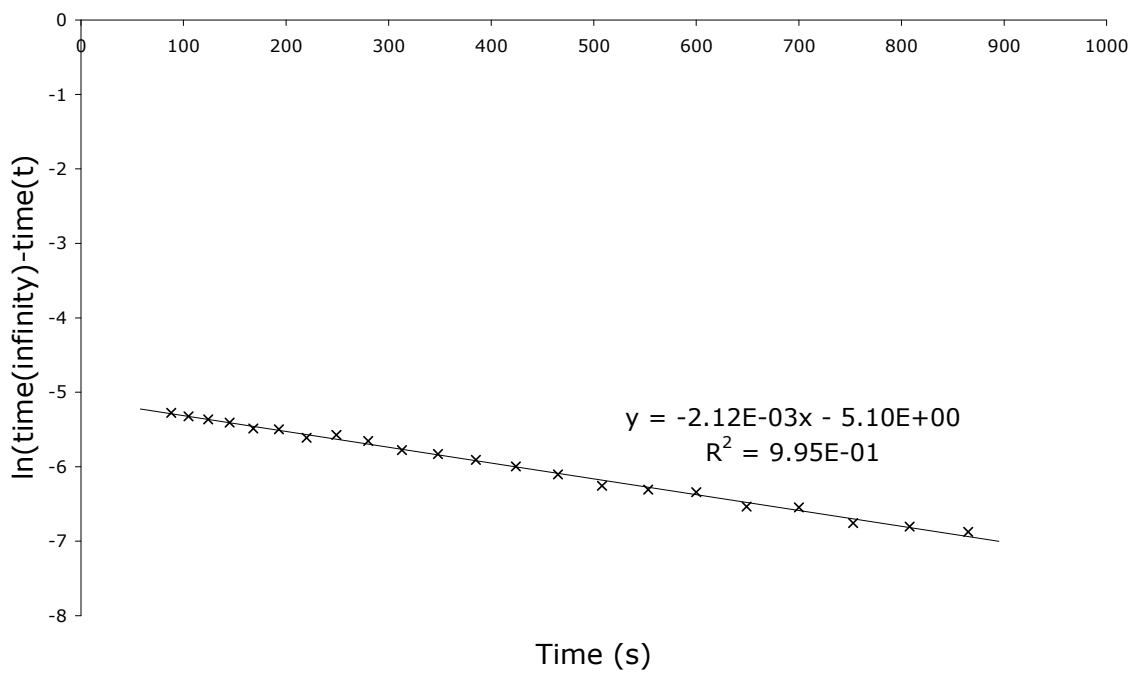



Formation of **2** from **20e** (R = nitro)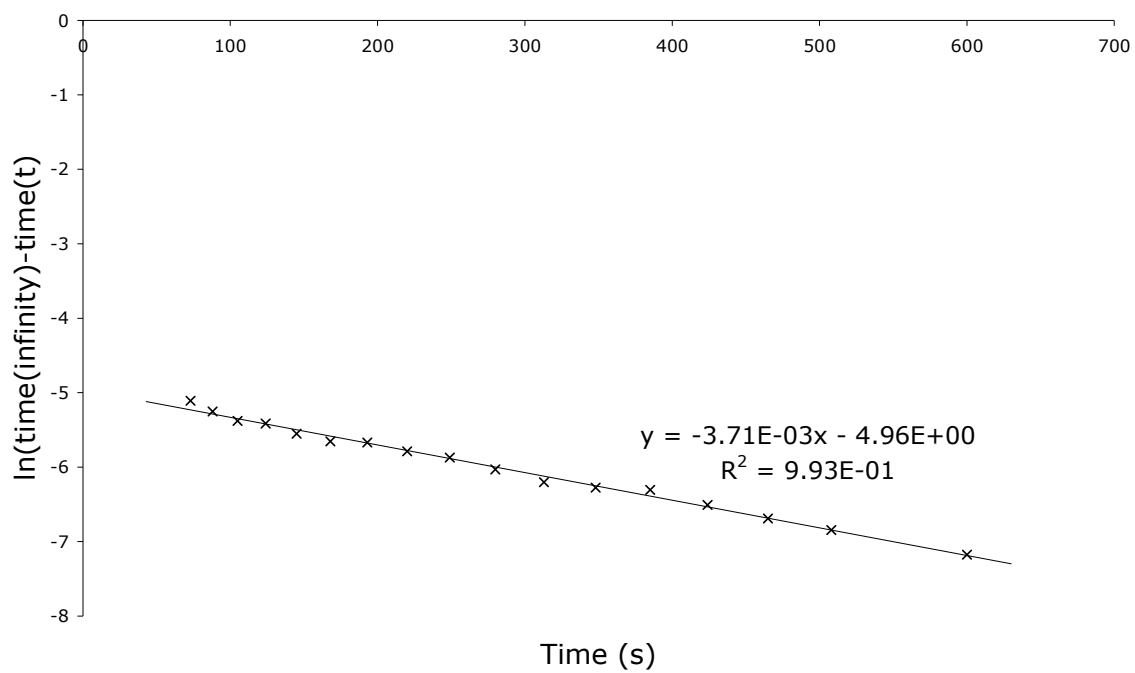

| <u>Substituent (R)</u> | <u><math>\sigma</math></u> | <u><math>k</math> (s<sup>-1</sup>)</u> |
|------------------------|----------------------------|----------------------------------------|
| NO <sub>2</sub>        | 0.81                       | $3.71 \times 10^{-3}$                  |
| Ac                     | 0.47                       | $2.12 \times 10^{-3}$                  |
| Br                     | 0.26                       | $1.49 \times 10^{-3}$                  |
| F                      | 0.15                       | $1.44 \times 10^{-3}$                  |
| H                      | 0.00                       | $9.19 \times 10^{-4}$                  |

### Hammett Plot

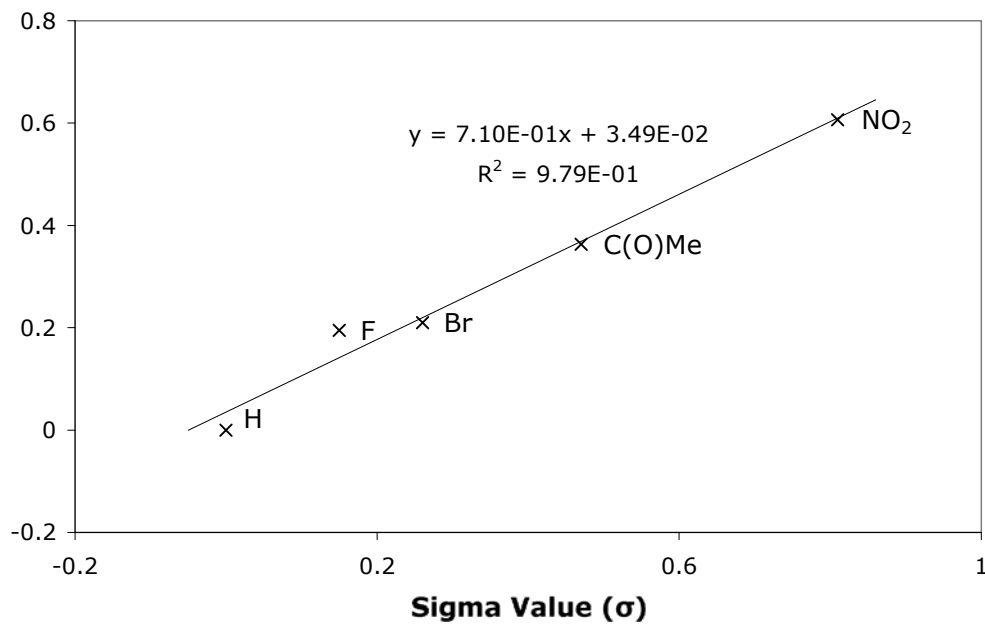

Decomposition of complexes **20f** (*p*-Me) and **20g** (*p*-OMe) with bridging benzoate ligands substituted with electron donating ligands was not linearly correlated with Hammett  $\sigma$ -value. Complex **20g** decomposed too rapidly for accurate determination of rate under the conditions used to evaluate decomposition of **20a–f**. Kinetics of the decomposition of **20f** are shown below with a Hammett plot showing the non-linear behavior of rate of decomposition when **20f** is included.

Formation of **2** from **20f** (R = Me)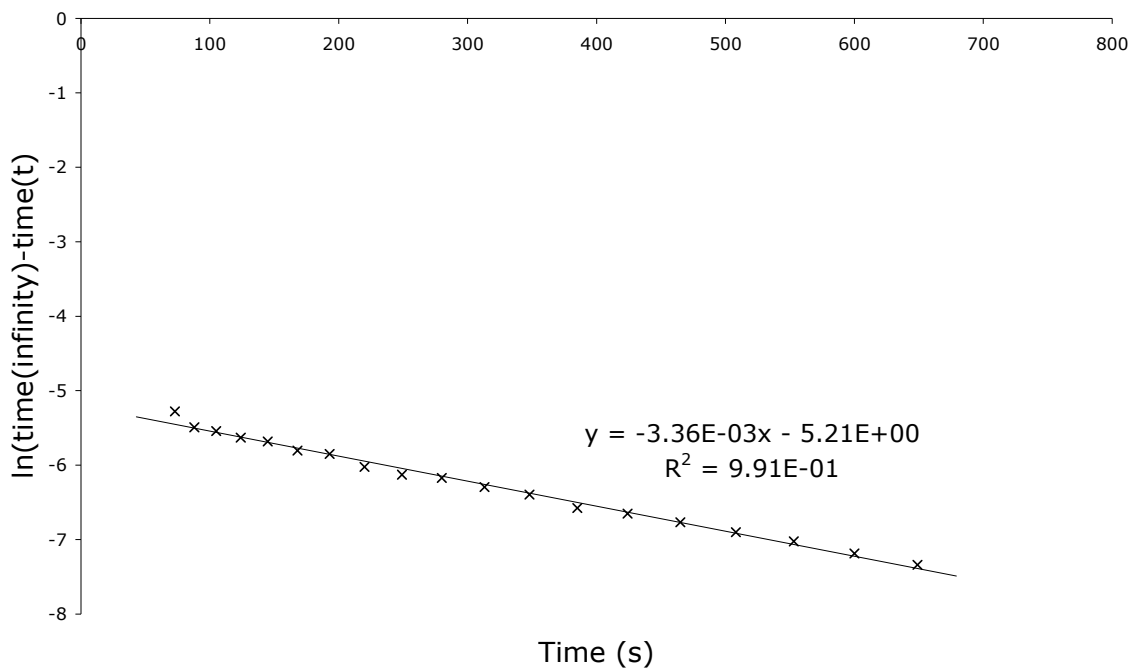

## Hammett Plot

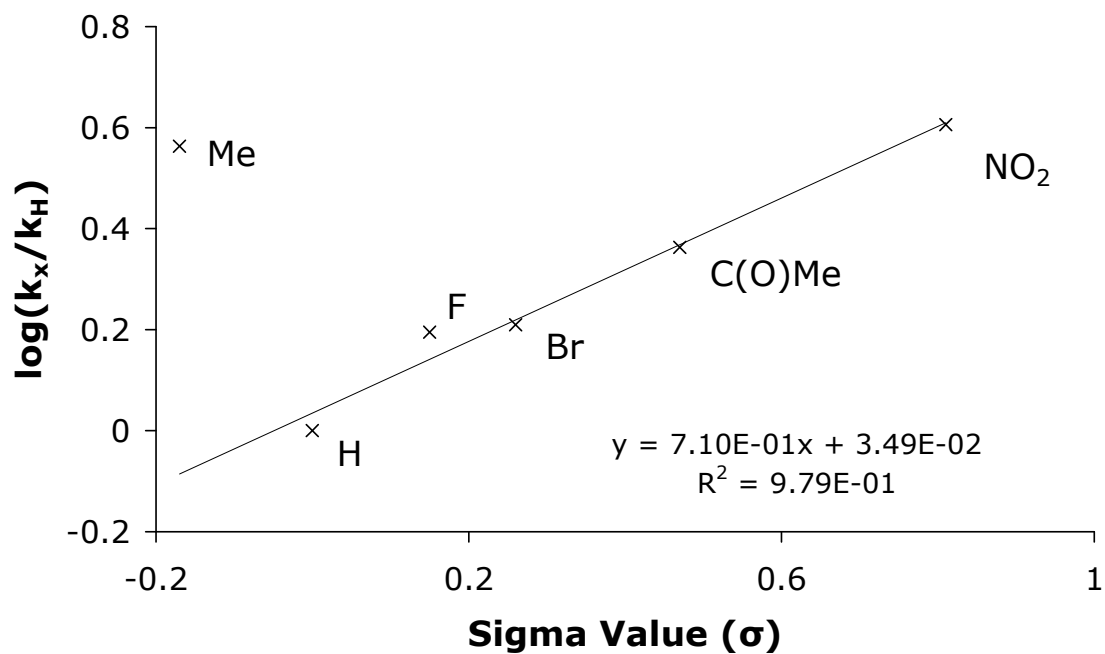

The non-linear relationship between rate of C-Cl bond formation and Hammett  $\sigma$ -value for

complexes bearing electron-rich benzoate ligands may be a reflection of the ligand fluxionality that we have documented at carboxylate-bridged dinuclear Pd(III) complexes. The equilibrium distribution of carboxylate in the bridging versus apical positions is dictated by the differing electronic roles of these two positions (in complex **10**, the partial charge on the oxygen atoms in the bridging acetate ligands are calculated to be  $-0.64862$  and  $-0.69649$ , while the partial charges on the oxygen atoms of the apical acetate ligands are calculated to be  $-0.69832$  and  $-0.70219$ ). Changing the electronics of the carboxylates from electron-poor to electron-rich may alter the distribution of apical versus bridging carboxylate and give rise to the observed non-linearity.

## Apical Ligand Experiment (Data Pertaining to Schemes 3, 4, and 5)

### 2-Phenylpyridyl palladium acetate dimer (S23)

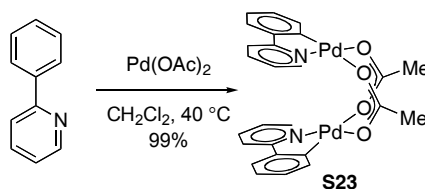

To a solution of 2-phenylpyridine (3.46 g, 22.3 mmol, 1.00 equiv) in  $\text{CH}_2\text{Cl}_2$  (220 mL) at 23 °C is added palladium acetate (5.00 g, 22.3 mmol, 1.00 equiv). After stirring for 3 h, the orange solution is concentrated in vacuo and the solid residue is triturated with  $\text{Et}_2\text{O}$  (70 mL). The solid isolated by vacuum filtration and washed with  $\text{Et}_2\text{O}$  ( $2 \times 30$  mL) to afford 7.07 g of the title compound as an orange-yellow solid (99% yield).

NMR Spectroscopy:  $^1\text{H}$  NMR (500 MHz,  $\text{CDCl}_3$ , 23 °C,  $\delta$ ): 7.89–7.88 (m, 1H), 7.39–7.36 (m, 1H), 7.08 (d,  $J = 7.8$  Hz, 1H), 6.93–6.79 (m, 4H), 6.46–6.43 (m, 1H), 2.27 (s, 3H).  $^{13}\text{C}$  NMR (125 MHz,  $\text{CDCl}_3$ , 23 °C,  $\delta$ ): 181.6, 150.0, 137.4, 131.8, 128.4, 123.8, 122.3, 121.0, 117.1, 24.9. These spectroscopic data correspond to the reported data.<sup>11</sup>

### (2-phenylpyridyl) palladium benzoate dimer (21)

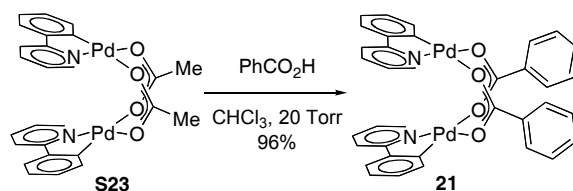

To a suspension of (2-phenylpyridyl) palladium acetate dimer (**S23**) (901 mg, 1.41 mmol, 1.00 equiv) in  $\text{CHCl}_3$  (50 mL) at 23 °C was added benzoic acid (344 mg, 2.82 mmol, 2.00 equiv) and the reaction mixture was stirred at 23 °C for 1h. Solvent was removed in vacuo. The residue was taken up in  $\text{CHCl}_3$  (50 mL) and solvent was removed in vacuo three times, sequentially in order to remove all AcOH. The residue was triturated in  $\text{Et}_2\text{O}$  (25 mL) to afford 1.03 g of the title compound as a yellow solid (96%

yield) in a 10:1 ratio of isomers (2-phenylpyridyl ligands head to tail vs. head to head).

Melting Point: >250 °C. <sup>1</sup>H-NMR (600 MHz, CD<sub>2</sub>Cl<sub>2</sub>, 23 °C, δ): Major Isomer : 8.28 (ddd, *J* = 8.2 Hz, *J* = 1.3 Hz, *J* = 0.6 Hz, 4H), 7.98 (ddd, *J* = 5.7 Hz, *J* = 0.7 Hz, *J* = 0.7 Hz, 2H), 7.49 (tt, *J* = 7.6 Hz, *J* = 1.3 Hz, 2H), 7.42 (dd, *J* = 7.9 Hz, *J* = 7.9 Hz, 4H), 7.38 (ddd, *J* = 7.6 Hz, *J* = 7.6 Hz, *J* = 1.5 Hz, 2H), 7.12 (d, *J* = 8.1 Hz, 2H), 6.96 (dd, *J* = 7.6 Hz, *J* = 1.2 Hz, 2H), 6.90 (dd, *J* = 7.6 Hz, *J* = 1.5 Hz, 2H), 6.80 (ddd, *J* = 7.3 Hz, *J* = 7.3 Hz, *J* = 1.2 Hz, 2H), 6.75 (ddd, *J* = 7.3 Hz, *J* = 7.3 Hz, *J* = 1.5 Hz, 2H), 6.44 (ddd, *J* = 5.7 Hz, *J* = 5.7 Hz, *J* = 1.3 Hz, 2H). Minor Isomer : 8.14 (d, *J* = 6.6 Hz, 2H), 7.19 (d, *J* = 7.6 Hz, 2H), 6.67 (dd, *J* = 6.9 Hz, *J* = 6.9 Hz, 2H), 6.61 (dd, *J* = 7.2 Hz, *J* = 7.2 Hz, 2H). <sup>13</sup>C-NMR (125 MHz, CDCl<sub>3</sub>, 23 °C, δ): Major Isomer: 175.48, 164.32, 152.30, 150.09, 144.40, 137.46, 135.51, 131.92, 131.21, 130.19, 128.44, 127.79, 123.79, 122.21, 121.11, 117.08. UV-VIS Spectroscopy (CH<sub>2</sub>Cl<sub>2</sub>, 23 °C): 405 nm (ε = 1.82 × 10<sup>3</sup> M<sup>-1</sup> cm<sup>-1</sup>); 343 nm (ε = 4.13 × 10<sup>3</sup> M<sup>-1</sup> cm<sup>-1</sup>); 317 nm (ε = 5.70 × 10<sup>3</sup> M<sup>-1</sup> cm<sup>-1</sup>); 306 nm (ε = 7.24 × 10<sup>3</sup> M<sup>-1</sup> cm<sup>-1</sup>). Mass Spectrometry: LRMS-FIA (m/z): calcd for [C<sub>36</sub>H<sub>26</sub>N<sub>2</sub>O<sub>4</sub>Pd<sub>2</sub>-C<sub>7</sub>H<sub>5</sub>O<sub>2</sub>]<sup>+</sup>, 640.967. Found, 640.969.

### (2-phenylpyridyl) palladium *p*-nitrobenzoate dimer (**23**)

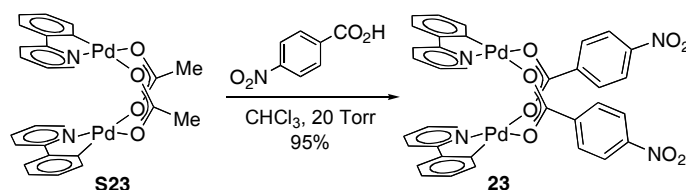

To a suspension of (2-phenylpyridyl) palladium acetate dimer (**S23**) (1.09 g, 1.70 mmol, 1.00 equiv) in CHCl<sub>3</sub> (70 mL) at 23 °C was added *p*-nitrobenzoic acid (568 mg, 3.40 mmol, 2.00 equiv) and the reaction mixture was stirred at 23 °C for 1h. Solvent was removed in vacuo. The residue was taken up in CHCl<sub>3</sub> (50 mL) and solvent was removed in vacuo three times, sequentially in order to remove all AcOH. The residue was triturated in Et<sub>2</sub>O (25 mL) to afford 1.38 g of the title compound as a yellow solid (95% yield) in a 11:1 ratio of isomers (2-phenylpyridyl ligands head to tail vs. head to head).

Melting Point: >250 °C. <sup>1</sup>H-NMR (600 MHz, CDCl<sub>3</sub>, 23 °C, δ): Major Isomer : 8.40 (d, *J* = 8.8 Hz, 4H), 8.26 (d, *J* = 8.8 Hz, 4H), 7.90 (dd, *J* = 5.7 Hz, *J* = 0.9 Hz, 2H), 7.43 (ddd, *J* = 8.1 Hz, *J* = 8.1 Hz, *J* = 1.6 Hz, 2H), 7.16 (d, *J* = 7.9 Hz, 2H), 6.93 (dd, *J* = 7.8 Hz, *J* = 1.2 Hz, 2H), 6.85–6.82 (m, 4H), 6.77 (ddd, *J* = 7.0 Hz, *J* = 7.0 Hz, *J* = 1.5 Hz, 2H), 6.49 (ddd, *J* = 7.2 Hz, *J* = 5.6 Hz, *J* = 1.3 Hz, 2H). Minor Isomer : 8.05 (d, *J* = 5.8 Hz, 2H), 7.53 (ddd, *J* = 6.3 Hz, *J* = 6.3 Hz, *J* = 1.6 Hz, 2H), 7.23 (d, *J* = 7.3 Hz, 2H), 6.72 (ddd, *J* = 5.7, *J* = 5.7 Hz, *J* = 5.7 Hz, 2H), 6.68 (d, *J* = 7.8 Hz, 2H), 6.62 (ddd, *J* = 7.5 Hz, *J* = 7.5 Hz, *J* = 1.5 Hz, 2H). <sup>13</sup>C-NMR (125 MHz, CD<sub>2</sub>Cl<sub>2</sub>, 23 °C, δ): Major Isomer: 173.95, 164.60, 151.57, 150.21, 150.16, 144.90, 141.08, 138.51, 131.77, 131.30, 128.97, 124.72, 123.50, 123.08, 121.90, 117.97. UV-VIS Spectroscopy (CH<sub>2</sub>Cl<sub>2</sub>, 23 °C): 398 nm (ε = 3.36 × 10<sup>3</sup> M<sup>-1</sup> cm<sup>-1</sup>); 341 nm (ε = 8.33 × 10<sup>3</sup> M<sup>-1</sup> cm<sup>-1</sup>); 317 nm (ε = 1.50 × 10<sup>4</sup> M<sup>-1</sup> cm<sup>-1</sup>). Mass Spectrometry: LRMS-FIA (m/z): calcd for [C<sub>36</sub>H<sub>24</sub>N<sub>4</sub>O<sub>8</sub>Pd<sub>2</sub>-C<sub>7</sub>H<sub>4</sub>NO<sub>4</sub>], 685.95. Found, 685.94.

**(2-phenylpyridyl) palladium (III) benzoate *p*-nitrobenzoate dimer (22)**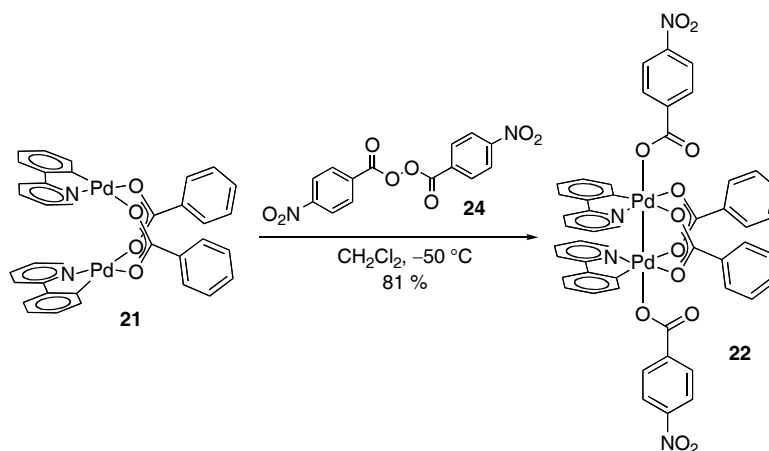

This reaction was carried out in a nitrogen-filled dry box. To a solution of (2-phenylpyridyl) palladium benzoate dimer (**21**) (24.4 mg,  $3.20 \times 10^{-5}$  mol, 1.00 equiv) in  $\text{CH}_2\text{Cl}_2$  (2.0 mL) at  $-50\text{ }^\circ\text{C}$  was added bis(*p*-nitrobenzoyl) peroxide (**24**) (10.6 mg,  $3.20 \times 10^{-5}$  mol, 1.00 equiv) in one portion. The reaction mixture was stirred at  $-50\text{ }^\circ\text{C}$  for 1 h. Solvent was removed in vacuo and the residue was triturated with  $\text{Et}_2\text{O}$  at  $-50\text{ }^\circ\text{C}$ . The residue was dried in vacuo at  $-50\text{ }^\circ\text{C}$  to afford 28.4 mg of the title compound as a dark red solid (81% yield) in a 10:1 ratio of isomers (2-phenylpyridyl ligands head to tail vs. head to head).

$^1\text{H-NMR}$  (500 MHz,  $\text{CD}_2\text{Cl}_2$ ,  $-50\text{ }^\circ\text{C}$ ,  $\delta$ ): Major Isomer : 8.38 (dd,  $J = 7.3\text{ Hz}$ ,  $J = 1.5\text{ Hz}$ , 4H), 8.11 (dd,  $J = 5.9\text{ Hz}$ ,  $J = 1.0\text{ Hz}$ , 2H), 8.08 (d,  $J = 8.8\text{ Hz}$ , 4H), 7.92 (d,  $J = 9.3\text{ Hz}$ , 4H), 7.71–7.65 (m, 4H), 7.54 (dd,  $J = 7.8\text{ Hz}$ ,  $J = 7.8\text{ Hz}$ , 4H), 7.32 (d,  $J = 8.3\text{ Hz}$ , 2H), 7.12 (dd,  $J = 7.8\text{ Hz}$ ,  $J = 1.0\text{ Hz}$ , 2H), 7.05–6.97 (m, 6H), 6.71 (ddd,  $J = 5.9\text{ Hz}$ ,  $J = 1.0\text{ Hz}$ ,  $J = 1.0\text{ Hz}$ , 2H). Minor Isomer : 8.58 (d, 4H), 7.75–7.71 (m), 7.24 (dd,  $J = 7.8\text{ Hz}$ ,  $J = 7.8\text{ Hz}$ , 4H). UV-VIS Spectroscopy ( $\text{CH}_2\text{Cl}_2$ ,  $0\text{ }^\circ\text{C}$ ): 434 nm ( $\epsilon = 2.09 \times 10^4\text{ M}^{-1}\text{ cm}^{-1}$ ).

**Thermolysis of (2-phenylpyridyl) palladium (III) benzoate *p*-nitrobenzoate dimer (22)**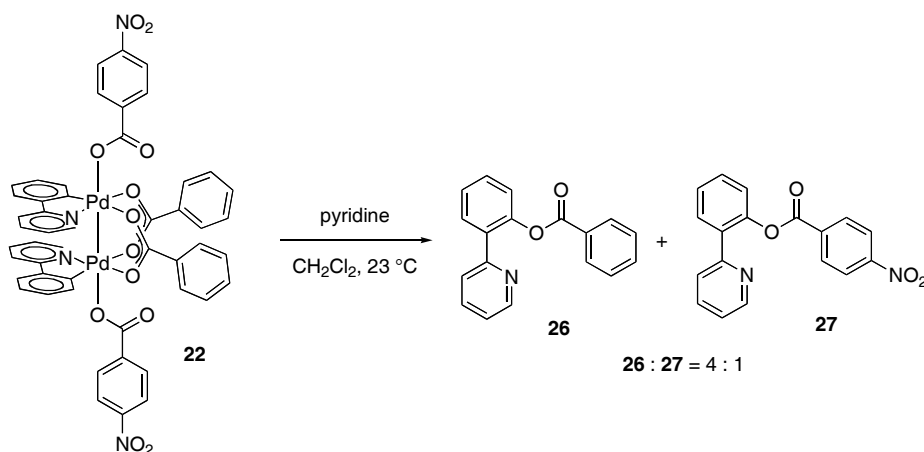

This reaction was carried out in a nitrogen-filled dry box. To a solution of (2-phenylpyridyl) palladium (III) benzoate *p*-nitrobenzoate dimer (**22**) (95.9 mg,  $8.75 \times 10^{-5}$  mol, 1.00 equiv) in  $\text{CH}_2\text{Cl}_2$  (6.0 mL) at  $-50$  °C was added pyridine (141  $\mu\text{L}$ , 1.75 mmol, 20.0 equiv) in one portion. The reaction mixture was allowed to warm to  $23$  °C, at which time the reaction mixture was stirred for 2 hours. Solvent was removed in vacuo. The residue was passed through a plug of silica gel eluting with hexanes / EtOAc (1:1 (v/v)). Solvent was removed in vacuo and  $^1\text{H}$  NMR of the residue indicated a 4 : 1 mixture of **26** and **27**. Separation of **26** and **27** was achieved by chromatography on silica gel eluting with hexanes / EtOAc (4:1 (v/v)) to afford 12.0 mg of **26** (50% yield) and 3.3 mg of **27** (12% yield).

2-(pyridin-2-yl)phenyl benzoate (**26**):  $R_f = 0.19$  (hexanes / EtOAc (4 / 1)).  $^1\text{H}$ -NMR (500 MHz,  $\text{CDCl}_3$ ,  $23$  °C,  $\delta$ ): 8.60 (d,  $J = 4.1$  Hz, 1H), 8.08 (d,  $J = 7.8$  Hz, 2H), 7.78 (dd,  $J = 7.8$  Hz,  $J = 1.4$  Hz, 1H), 7.64–7.56 (m, 3H), 7.50–7.45 (m, 3H), 7.41 (ddd,  $J = 7.8$  Hz,  $J = 7.8$  Hz,  $J = 0.9$  Hz, 1H), 7.31 (d,  $J = 8.2$  Hz, 1H), 7.16 (dd,  $J = 7.3$  Hz,  $J = 6.0$  Hz, 1H).  $^{13}\text{C}$ -NMR (125 MHz,  $\text{CDCl}_3$ ,  $23$  °C,  $\delta$ ): 165.16, 155.58, 149.62, 136.13, 133.43, 133.33, 130.92, 130.17, 129.71, 129.50, 128.48, 126.40, 123.70, 123.31, 122.12, 110.67. Mass Spectrometry: HRMS-FIA ( $m/z$ ): calcd for  $[\text{C}_{18}\text{H}_{13}\text{NO}_2+\text{H}]^+$ , 276.1019 Found, 276.1019. These spectroscopic data correspond to those reported in the literature.<sup>12</sup>

2-(pyridin-2-yl)phenyl 4-nitrobenzoate (**27**):  $R_f = 0.11$  (hexanes / EtOAc (4 / 1)).  $^1\text{H}$ -NMR (500 MHz,  $\text{CDCl}_3$ ,  $23$  °C,  $\delta$ ): 8.49 (d,  $J = 4.1$  Hz, 1H), 8.30 (d,  $J = 8.7$  Hz, 2H), 8.24 (d,  $J = 8.7$  Hz, 2H), 7.74 (dd,  $J = 7.8$  Hz,  $J = 1.4$  Hz, 1H), 7.67 (ddd,  $J = 7.8$  Hz,  $J = 7.8$  Hz,  $J = 1.4$  Hz, 1H), 7.54–7.50 (m, 2H), 7.44 (dd,  $J = 7.3$  Hz,  $J = 7.3$  Hz, 1H), 7.33 (d,  $J = 8.2$  Hz, 1H), 7.17 (dd,  $J = 6.9$  Hz,  $J = 5.0$  Hz, 1H).  $^{13}\text{C}$ -NMR (125 MHz,  $\text{CDCl}_3$ ,  $23$  °C,  $\delta$ ): 163.46, 155.60, 150.74, 149.45, 147.93, 136.41, 135.05, 132.97, 131.25, 130.87, 129.90, 126.87, 123.60, 123.43, 123.19, 122.31. Mass Spectrometry: HRMS-FIA ( $m/z$ ): calcd for  $[\text{C}_{18}\text{H}_{12}\text{N}_2\text{O}_4+\text{H}]^+$ , 321.0870 Found, 321.0873. These spectroscopic data correspond to those reported in the literature.<sup>12</sup>

### Reaction of (2-phenylpyridyl) palladium *p*-nitrobenzoate dimer (**23**) with benzoyl peroxide (**25**)

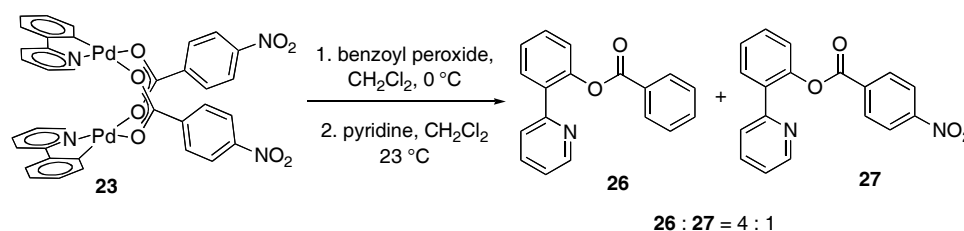

This reaction was carried out in a nitrogen-filled dry box. To a solution of (2-phenylpyridyl) palladium *p*-nitrobenzoate dimer (**23**) (32.8 mg,  $3.84 \times 10^{-5}$  mol, 1.00 equiv) in  $\text{CH}_2\text{Cl}_2$  (3.0 mL) at  $0$  °C was added benzoyl peroxide (**25**) (9.3 mg,  $3.8 \times 10^{-5}$  mol, 1.0 equiv) in one portion. The reaction mixture was stirred at  $0$  °C for 5 minutes, at which time the reaction mixture was dark red. Pyridine (62.0  $\mu\text{L}$ ,  $7.68 \times 10^{-4}$  mol, 20.0 equiv) was added in one portion and the reaction mixture was allowed to warm to  $23$  °C, at which time the reaction mixture was stirred for 1.5 hours. Solvent was removed in vacuo. The residue was passed through a plug of silica gel eluting with hexanes / EtOAc (1:1 (v/v)). Solvent was removed in vacuo and  $^1\text{H}$  NMR of the residue indicated a 4 : 1 mixture of **26** and **27**.

The spectroscopic data of **26** and **27** correspond to those reported above.

### Reaction of (2-phenylpyridyl) palladium *p*-nitrobenzoate dimer (**23**) with benzoyl(*p*-nitrobenzoyl) peroxide (**30**)

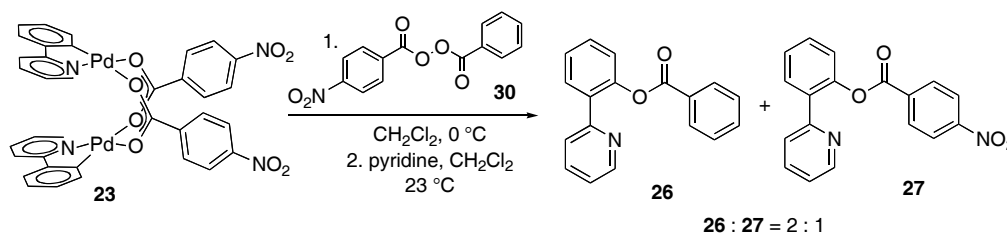

This reaction was carried out in a nitrogen-filled dry box. To a solution of (2-phenylpyridyl) palladium *p*-nitrobenzoate dimer (**23**) (36.0 mg,  $4.22 \times 10^{-5}$  mol, 1.00 equiv) in CH<sub>2</sub>Cl<sub>2</sub> (4.0 mL) at  $-50$  °C was added benzoyl(*p*-nitrobenzoyl) peroxide (**30**) (12.1 mg,  $4.22 \times 10^{-5}$  mol, 1.00 equiv) in one portion. The reaction mixture was stirred at  $-50$  °C for 45 minutes, at which time the reaction mixture was dark red. Pyridine (68.0  $\mu$ L,  $8.44 \times 10^{-4}$  mol, 20.0 equiv) was added in one portion and the reaction mixture was allowed to warm to 23 °C, at which time the reaction mixture was stirred for 2 hours. Solvent was removed in vacuo. The residue was passed through a plug of silica gel eluting with hexanes / EtOAc (1:1 (v/v)). Solvent was removed in vacuo and <sup>1</sup>H NMR of the residue indicated a 2 : 1 mixture of **26** and **27**.

The spectroscopic data of **26** and **27** correspond to those reported above.

### Bis(*p*-nitrobenzoyl) peroxide (**24**)

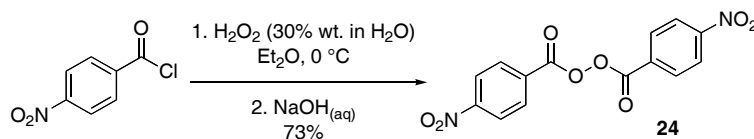

To a solution of 4-nitrobenzoyl chloride (5.66 g, 30.5 mmol, 1.00 equiv) in Et<sub>2</sub>O (10 mL) at 0 °C was added 30% H<sub>2</sub>O<sub>2(aq)</sub> (1.95 mL, 2.16 g, 19.1 mmol, 0.626 equiv) dropwise over 10 minutes. After stirring for 10 minutes, NaOH (1.5 g, 37.5 mmol, 1.23 equiv) in H<sub>2</sub>O (10 mL) was added dropwise over 20 minutes. The resulting precipitate was isolated by vacuum filtration, washed with H<sub>2</sub>O (3  $\times$  10 mL) and Et<sub>2</sub>O (3  $\times$  10 mL), and dried to afford 4.61 g of the title compound as a colorless solid (91% yield).

$R_f$  = 0.35 (hexanes : EtOAc (4 : 1)). <sup>1</sup>H-NMR (500 MHz, CDCl<sub>3</sub>, 23 °C,  $\delta$ ): 8.40 (d,  $J$  = 8.7 Hz, 4H), 8.28 (d,  $J$  = 8.7 Hz, 4H). <sup>13</sup>C-NMR (125 MHz, CDCl<sub>3</sub>, 23 °C,  $\delta$ ): 161.07, 151.39, 131.11, 130.61, 124.11. These spectroscopic data correspond to those reported in the literature.<sup>13</sup>



**Benzoyl(*p*-nitrobenzoyl) peroxide (30)**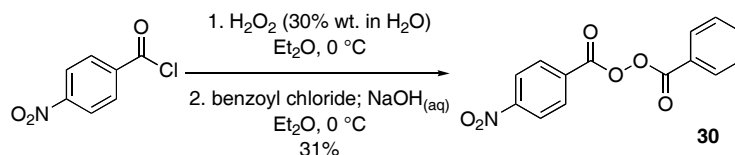

To a solution of 4-nitrobenzoyl chloride (2.80 g, 15.0 mmol, 1.00 equiv) in Et<sub>2</sub>O (10 mL) at 0 °C was added 30% H<sub>2</sub>O<sub>2(aq)</sub> (1.70 mL, 1.89 g, 16.6 mmol, 1.10 equiv) dropwise over 10 minutes. After stirring for 15 minutes, a solution of benzoyl chloride (1.75 mL, 2.12 g, 15.0 mmol, 1.00 equiv) was added at 0 °C. After stirring for 5 minutes, NaOH<sub>(aq)</sub> (1.50 g, 37.5 mmol, 2.50 equiv) in H<sub>2</sub>O (10 mL) was added dropwise over 20 minutes. The resulting precipitate was isolated by vacuum filtration and washed with H<sub>2</sub>O (3 × 10 mL) and Et<sub>2</sub>O (3 × 10 mL). The residue was purified by two sequential chromatographic separations (to remove byproduct **24**) on silica gel eluting with hexanes / EtOAc (19:1 (v/v)) to afford 1.34 g of the title compound<sup>14</sup> as a colorless solid (31% yield).

R<sub>f</sub> = 0.50 (hexanes : EtOAc (4 : 1)). <sup>1</sup>H-NMR (500 MHz, CDCl<sub>3</sub>, 23 °C, δ): 8.37 (d, *J* = 8.7 Hz, 2H), 8.27 (d, *J* = 8.7 Hz, 2H), 8.07 (d, *J* = 7.8 Hz, 2H), 7.69 (t, *J* = 7.3 Hz, 1H), 7.54 (dd, *J* = 7.8 Hz, *J* = 7.8 Hz, 2H). <sup>13</sup>C-NMR (125 MHz, CDCl<sub>3</sub>, 23 °C, δ): 162.74, 161.34, 151.21, 134.59, 131.16, 131.04, 129.82, 128.98, 125.10, 123.98.

**Reactivity of 1 in the Presence of Exogenous AcOH (Data Pertaining to Figure 4)<sup>6</sup>**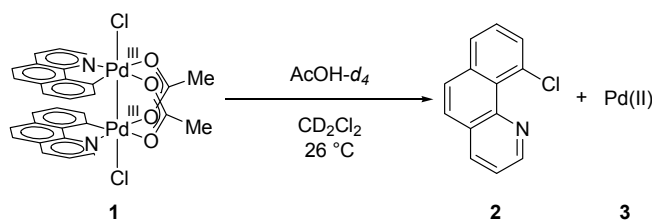

Stock solutions of compound **9** (20.2 mM) and PhICl<sub>2</sub> (20.2 mM) were prepared in CD<sub>2</sub>Cl<sub>2</sub>. Under N<sub>2</sub>, to the solution of compound **9** (350 μL) was added *n* μL AcOH-*d*<sub>4</sub>.<sup>7</sup> To the resulting solution was added the

<sup>6</sup> Previously, we have reported rate enhancement for the formation of **2** from **1** at 23 °C in the presence of **8**. Based on extensive re-examination of this rate effect, we have revised our original proposal that **8** acts as a ligand for **1** and now provide evidence that the observed acceleration is due to acid, not *N*-ligation. We believe that acid generated by metallation of **8** by **3** is responsible for the acceleration observed in the presence of **8**. For the original data regarding the effect of **8** on the rate of C–Cl reductive elimination, see Appendix E.

<sup>7</sup> At high concentrations of AcOH (data obtained of 0.94 and 1.16 M AcOH, a small amount (<10 %) of **12** was observed during the course of the reaction. The peak corresponding to **12** (9.14 ppm) was observed to increase at early times before being completely consumed at later times in the reaction. This observation is consistent with our earlier observations that the product of C–O reductive elimination can be consumed by the Pd-containing byproducts of reductive elimination.

PhICl<sub>2</sub> solution (350 μL). <sup>1</sup>H NMR spectra were obtained; the evolution of **2** was monitored by the <sup>1</sup>H NMR signal at 9.12 ppm. These signals were integrated relative the residual proton signal from CD<sub>2</sub>Cl<sub>2</sub>. Since evolution of product was measured, linear natural log plots were obtained by using an infinite time point set to 100% yield. In each case, the reactions were followed to greater than 3 half-lives. Data were fitted to a first order regression; plots, slopes, and R<sup>2</sup> values are reported below.

### Formation of **2** (0.00 M AcOH)

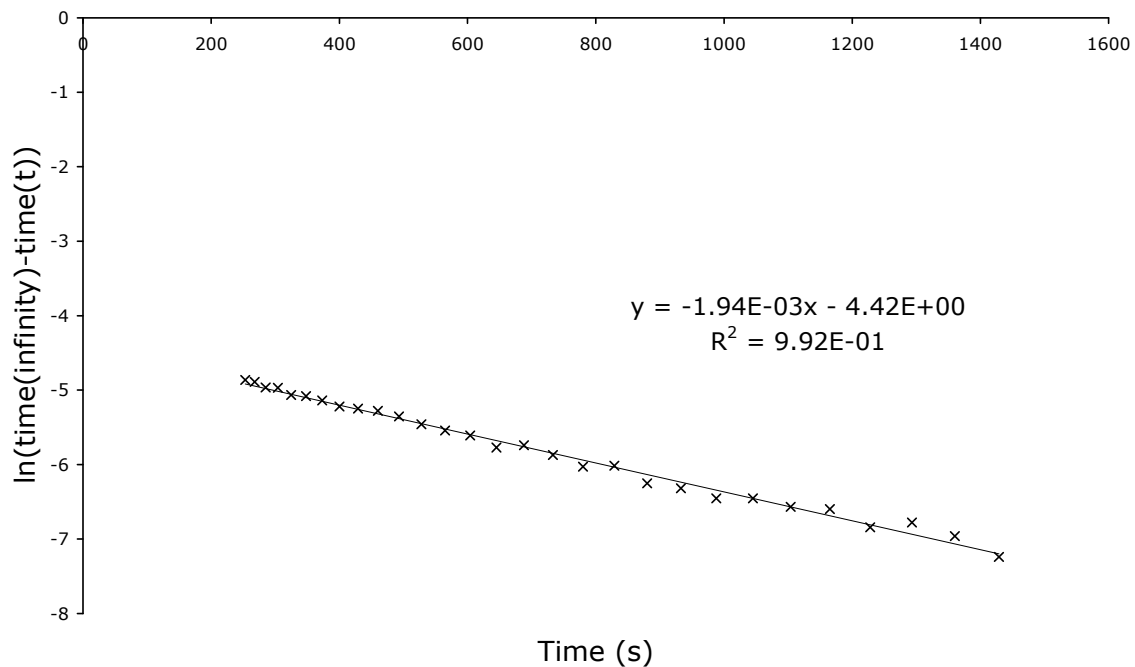

Formation of **2** (0.25 M AcOH)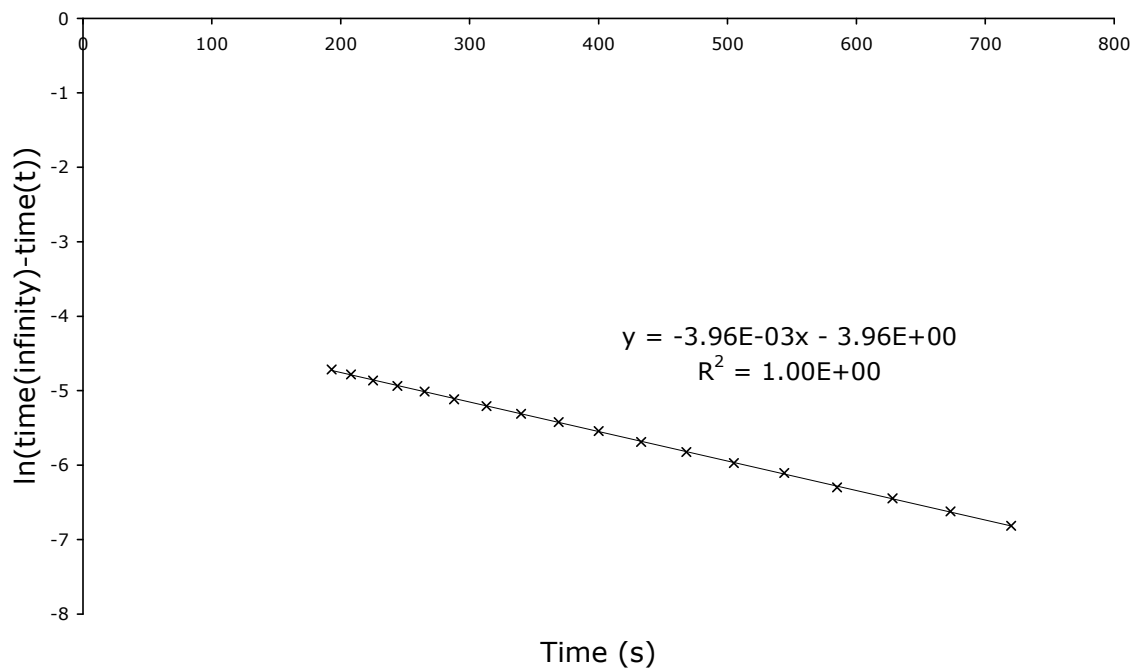Formation of **2** (0.49 M AcOH)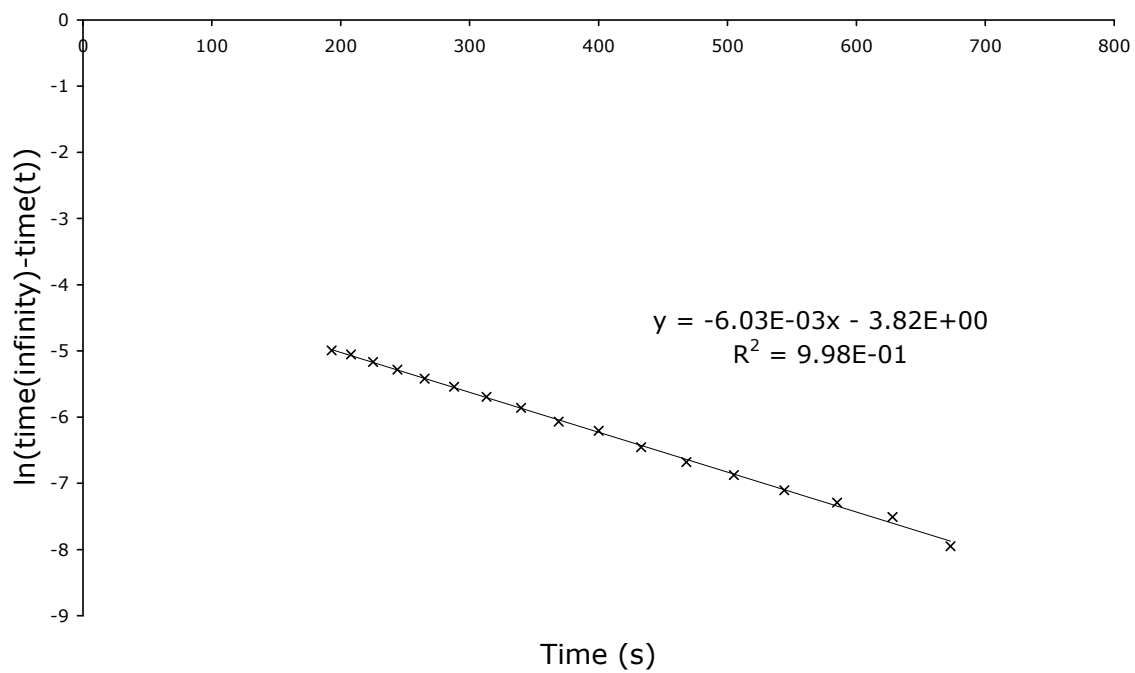

Formation of **2** (0.72 M AcOH)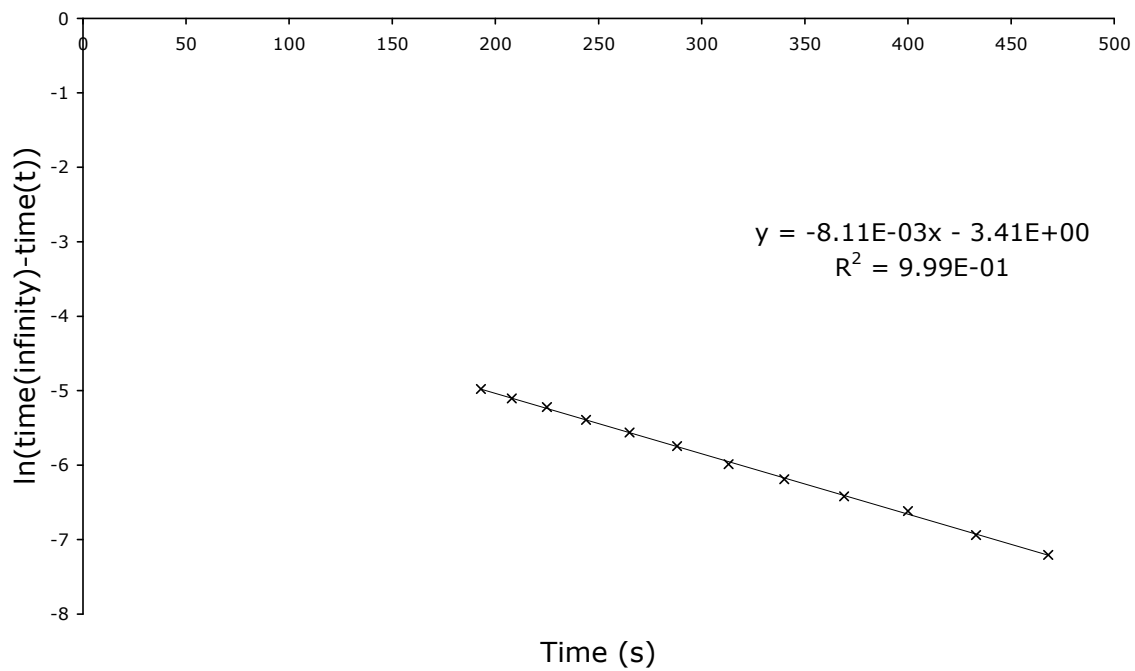Formation of **2** (0.94 M AcOH)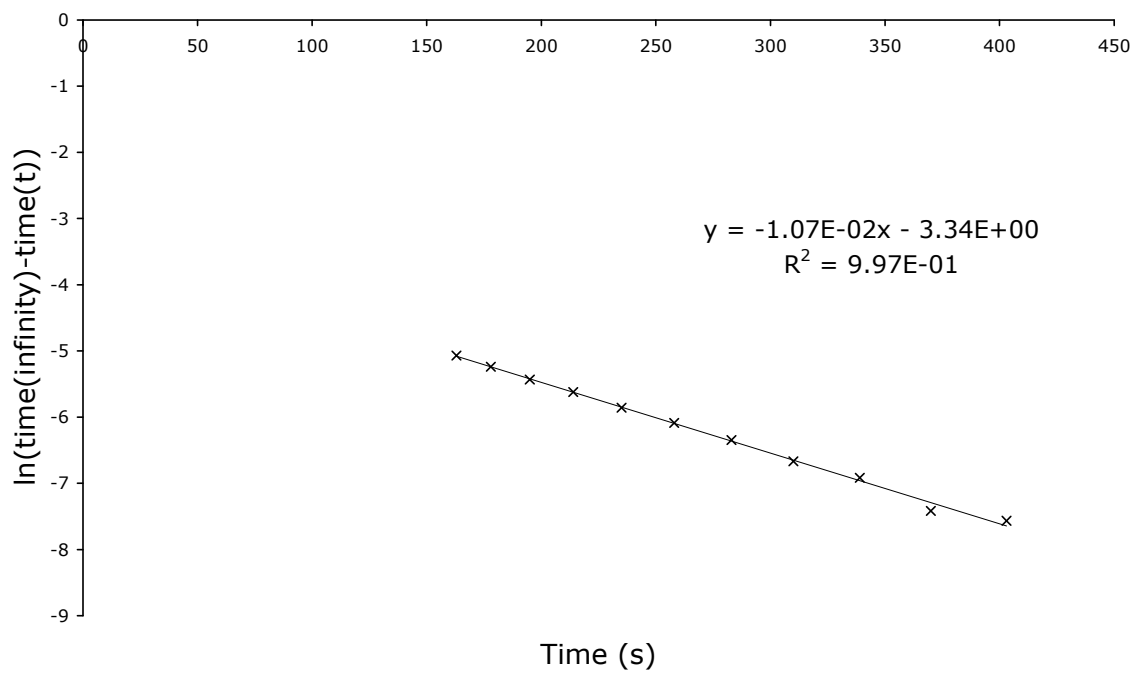

Formation of **2** (1.16 M AcOH)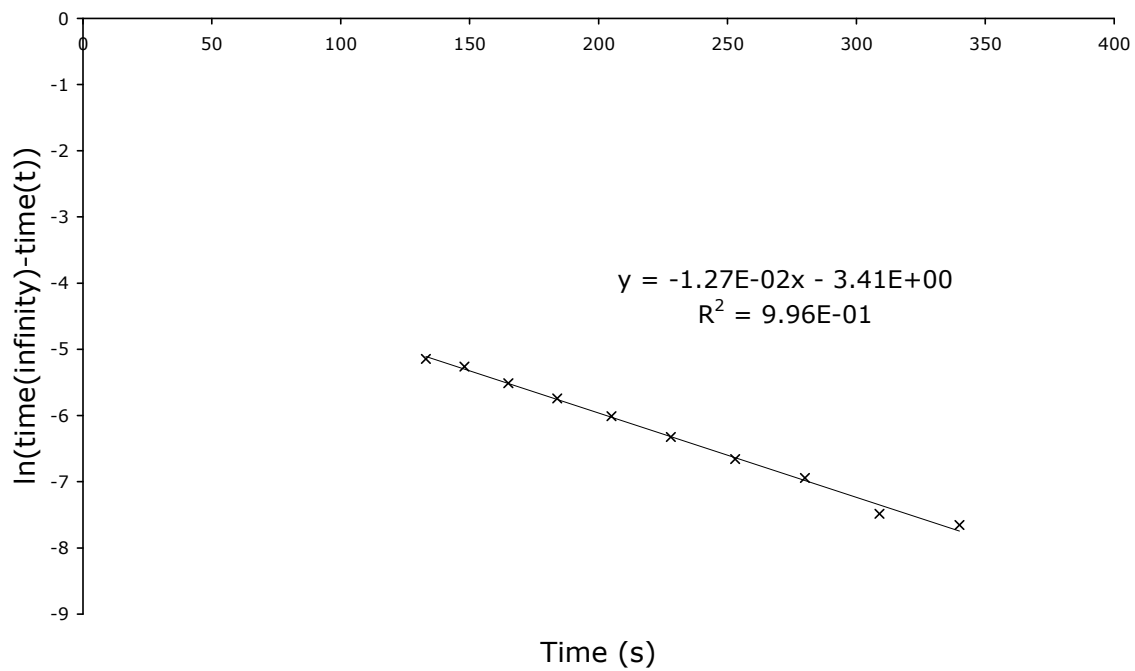

## Rate Constant vs [AcOH]

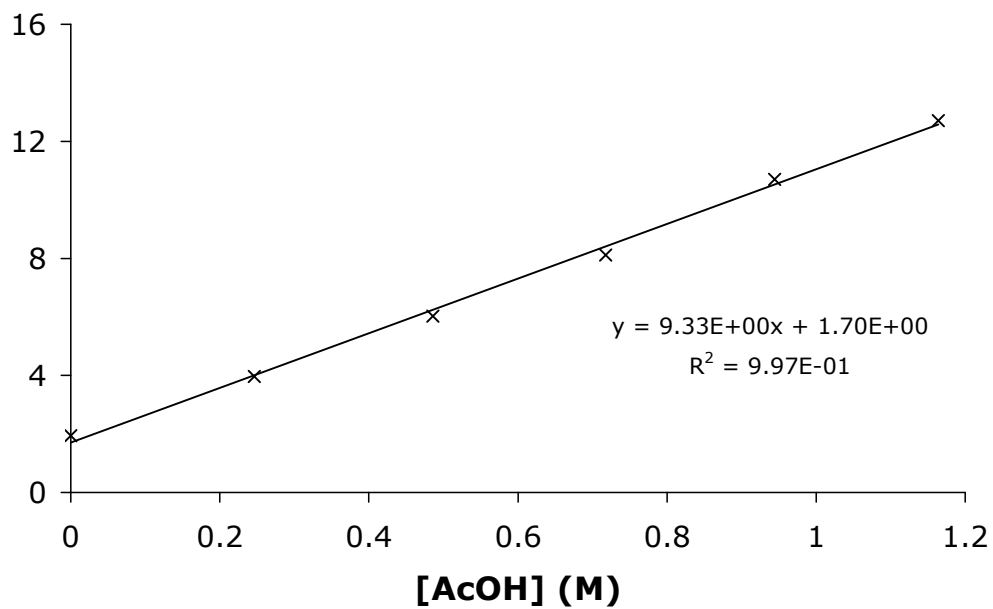

## Computational Details

### Computational Methods

Calculations were performed using density functional theory (DFT) with the M06 functional,<sup>15</sup> as implemented in Jaguar 7.6.110<sup>16</sup>. All calculations used the Hay and Wadt small core-valence relativistic effective-core-potential<sup>17</sup> (ECP) for Pd. The LACV3P\*\* basis set was used for all geometry optimizations and LACV3P++\*\*(2f) for energies. LACV3P++\*\*(2f) utilizes the LACV3P++\*\* basis set as implemented in Jaguar plus a double-zeta f-shell with exponents from Martin and Sundermann.<sup>18</sup> All electrons were described for all other atoms using the 6-31G\*\* (except Cl using 6-311G\*\* for geometry optimizations) or 6-311++G\*\* basis sets for electronic energies.<sup>19,20</sup> For each optimized structure, the M06 analytic Hessian was calculated to obtain the vibrational frequencies, which in turn were used to obtain the zero point energies and free energy corrections (without translational or rotational components). Solvent corrections were based on single point self-consistent Poisson-Boltzmann continuum solvation calculations (using the LACVP\*\* basis set) for CH<sub>2</sub>Cl<sub>2</sub> ( $\epsilon = 8.93$  and  $R_0 = 2.33$  Å using the PBF<sup>21</sup> module in Jaguar).

Natural Bond Orbital<sup>22,23</sup> analyses were performed using the NBO 5.0 code<sup>24</sup> as implemented in Jaguar 7.6.110 on M06/LACV3P++\*\*(2f) wavefunctions. We obtained the NBO orbital energies for the 4s orbitals of Pd directly from the NBO output and converted the energies from Eh to eV by multiplying the Eh value by 27.211. Given that an effective-core potential basis set (LACV3P) is used for our calculations, the 1s to 3d electrons are described by a pseudopotential, and therefore unavailable for the NBO program. We chose the energies of the natural 4s orbital as a spherical descriptor for the electronic changes in the valence shell. We believe that the change in energy of the 4s natural orbital is a good “gauge” for the electric field in each Pd atom and will therefore follow changes in oxidation state.

All computed structures in the manuscript are designated by compound letters, not numbers.

### Structural Method Validation and Method Comparison

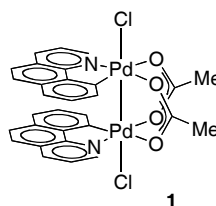

Method Comparison using structure 1

| Method= | Pd-Pd(Å) | Pd-N(Å) | Pd-C(Å) | Pd-Cl(Å) | [bhq]-<br>[bhq]*(Å) |
|---------|----------|---------|---------|----------|---------------------|
| M06     | 2.62     | 2.05    | 1.99    | 2.43     | 4.2                 |

|              |             |      |      |      |     |
|--------------|-------------|------|------|------|-----|
| <b>B3LYP</b> | 2.67        | 2.05 | 2.00 | 2.45 | 4.9 |
| <b>X-Ray</b> | <b>2.57</b> | 2.02 | 1.99 | 2.42 | 4.1 |

\*Distance measured between the C5-C6 midbond points of each benzo[*h*]quinolinylligand. This geometrical parameter describes the interaction between the aromatic ligands. As observed, B3LYP leads to 0.8 Å too long, which is consistent with the repulsive nature of the functional at medium-range.

All geometry optimizations used LACV3P\*\* for Pd, 6-311G\*\* for Cl and 6-31G\*\* for all other atoms.

#### Method Comparison using structure 10

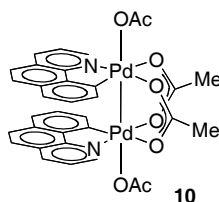

| Method=      | Pd-Pd(Å)    | Pd-N(Å)     | Pd-C(Å)     | Pd-OAc(Å)   |
|--------------|-------------|-------------|-------------|-------------|
| <b>M06</b>   | 2.59        | 2.04        | 1.99        | 2.13        |
| <b>M06-L</b> | 2.64        | 2.05        | 1.99        | 2.17        |
| <b>B3LYP</b> | 2.70        | 2.04        | 1.99        | 2.13        |
| <b>X-Ray</b> | <b>2.55</b> | <b>2.00</b> | <b>1.99</b> | <b>2.14</b> |

All geometry optimizations used LACV3P\*\* for Pd and 6-31G\*\* for all other atoms.

#### Method Validation using structure 9

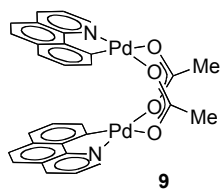

| Method=      | Pd-Pd(Å)    | Pd-N(Å)     | Pd-C(Å)     |
|--------------|-------------|-------------|-------------|
| <b>M06</b>   | 2.87        | 2.066       | 1.98        |
| <b>X-Ray</b> | <b>2.84</b> | <b>2.00</b> | <b>2.00</b> |

All geometry optimizations used LACV3P\*\* for Pd and 6-31G\*\* for all other atoms.

#### Evaluation of stability of isomers of 1

We investigated the positional exchange of the chloride and acetate ligands of complex **1** computationally using the M06/LACVP\*\* method. We found three additional isomers **1A**, **1B**, and **1C** shown below. We find that complex **1** is the most stable isomer by >10 kcal/mol (free energy at 298 K).

| Complex                                                                                               | 3D complex                                                                          | $\Delta G$ (kcal·mol <sup>-1</sup> ) | $\Delta H$ (kcal·mol <sup>-1</sup> ) |
|-------------------------------------------------------------------------------------------------------|-------------------------------------------------------------------------------------|--------------------------------------|--------------------------------------|
| 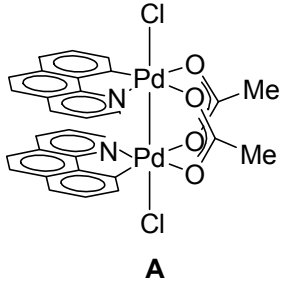 <p><b>A</b></p>     |    | <b>0.0</b>                           | <b>0.0</b>                           |
|  <p><b>SA1</b></p>   |    | <b>9.74</b>                          | <b>10.85</b>                         |
|  <p><b>SA2</b></p>  |   | <b>17.62</b>                         | <b>19.45</b>                         |
|  <p><b>SA3</b></p> |  | <b>8.88</b>                          | <b>10.43</b>                         |

### 1,2-Reductive Elimination

We have computationally investigated the energetic barrier of a 1,2-reductive elimination employing **SA**, in which one of the benzo[*h*]quinolynyl ligands is rotated 90° with respect to its position in **A**. The thermodynamic stability of **SA** evaluated with respect to **A**. We found that the isomerization is 8.1 kcal/mol uphill. We did not calculate any transition state relevant to the isomerization and cannot make any assertion with respect to the kinetic feasibility of such transformation.

We considered 1,2-reductive elimination happening across the Pd–Pd core. We find a transition state for such transformation at 46.6 kcal/mol higher in energy than **A**, likely a consequence of the relatively long distance between the C and Cl atoms bound to the different Pd centers. We also examined the 1,1-reductive elimination reactions that are possible from each of the metal centers in **SA**. We find that C–Cl



reductive elimination occurring from the same metal center (from the isomerized fragment (**SC**) or from the fragment similar to complex **A** (**SD**)) is very close in energy at roughly 30~31 kcal/mol. This is at least 10 kcal/mol higher in energy than the barrier for reductive elimination from **1**. Energies are electronic energies with solvation corrections for CH<sub>2</sub>Cl<sub>2</sub> (no thermodynamic corrections).

### 1,2-Reductive Elimination Pathway

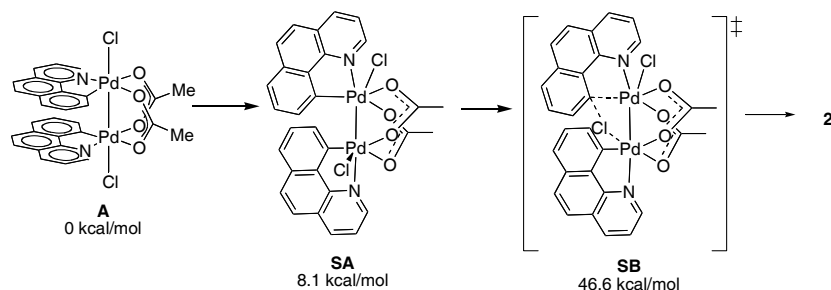

### 1,1-Reductive Elimination Pathway #1

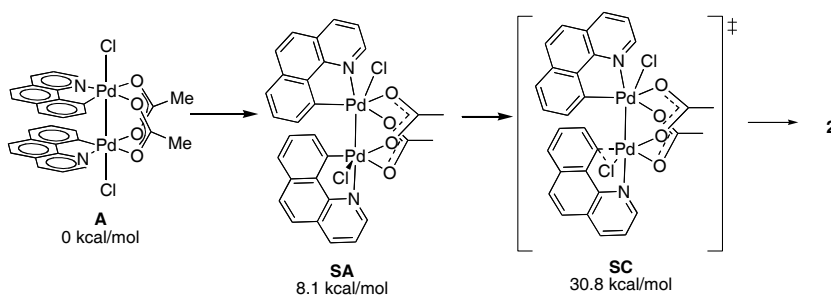

### 1,1-Reductive Elimination Pathway #2

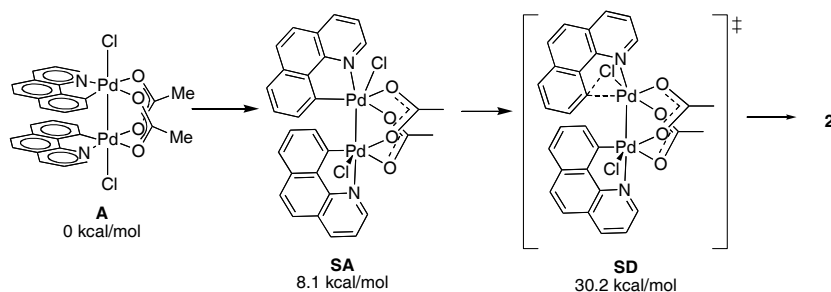

## Computed Kinetic Barrier to Disproportionation

We have computed a heterolytic cleavage mechanism occurring by simple elongation of the Pd–Pd bond. The vertical process generates two fragments: one cationic, one anionic. This ion-pair (**SE**) is calculated to be 39.3 kcal/mol higher in energy than **F**. Dissociation of chloride from the anionic fragment of **SE** lowers the potential energy by ~10 kcal/mol (**SF**). The solvated chloride coordinated to the Pd(IV) fragment (**SG**), predicted to be 18.5 kcal/mol lower in potential energy. Except for the vertical Pd–Pd heterolysis, all structures are stationary points and reflect thermodynamic stability of the complexes (no

activation barriers were calculated). Therefore, we believe that the adiabatic process will incur at least 29.5 kcal/mol which is  $\sim 10$  kcal/mol higher than the reductive elimination from **1**. Energies are electronic energies with solvation corrections for  $\text{CH}_2\text{Cl}_2$  (no thermodynamic corrections).

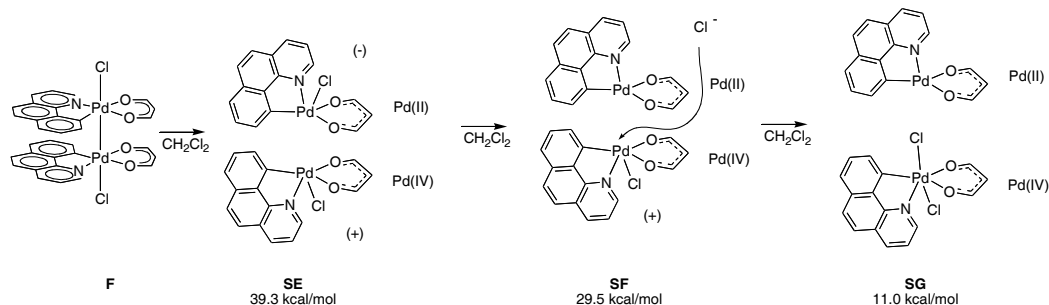

### Computed Reductive Elimination in the Presence of Acid

We investigated the protonation of complex **1** and found that protonation at the acetate oxygen trans to the carbon atom ( $\mathbf{A} + \text{H}^+_{\text{Oa}}$ ) coordination is 0.9 kcal/mol more stable (electronic energy in  $\text{CH}_2\text{Cl}_2$ ) than protonation at the acetate oxygen trans to the nitrogen atom ( $\mathbf{A} + \text{H}^+_{\text{Ob}}$ ) coordination. We were also able to locate a transition state for a protonated complex. We investigated all four possible oxygen protonation sites and found that the only available pathway involves protonation at the oxygen trans to the nitrogen atom bound to the Pd atom that is involved in reductive elimination ( $\text{Pd}_a$ ). All other protonated isomers of the transition state led to acetate de-coordination, followed by significant structural reorganization, at higher electronic energy than  $\mathbf{B} + \text{H}^+_{\text{Ob}}$ . Reductive elimination via  $\mathbf{B} + \text{H}^+_{\text{Ob}}$  is bimetallic: the EBEs of the 4s orbitals of  $\mathbf{A} + \text{H}^+_{\text{Ob}}$  are  $\text{Pd}_a$ : 93.8425389 and  $\text{Pd}_b$ : 94.1312517; the EBEs of the 4s orbitals of  $\mathbf{B} + \text{H}^+_{\text{Ob}}$  are  $\text{Pd}_a$ : 93.0887836 and  $\text{Pd}_b$ : 93.6580458.

| Complex                                   | Structure | $\Delta E$ ( kcal/mol) |
|-------------------------------------------|-----------|------------------------|
| <br>$\mathbf{A} + \text{H}^+_{\text{Ob}}$ |           | 0.9                    |
| <br>$\mathbf{A} + \text{H}^+_{\text{Oa}}$ |           | 0.0                    |

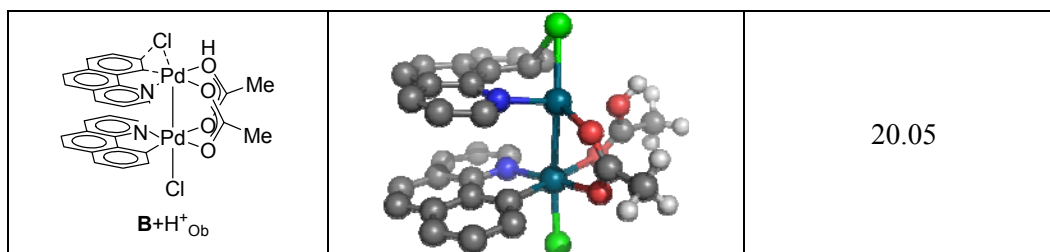

### Computational Investigation of Reductive Elimination from Cation Complex **M**

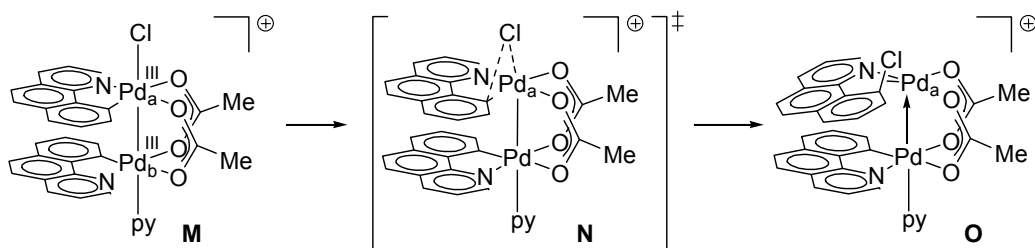

#### Electron Binding Energies

|                       | <b>M</b>    | <b>N</b>    | <b>O</b>    |
|-----------------------|-------------|-------------|-------------|
| <b>Pd<sub>a</sub></b> | 93.66287143 | 93.36245537 | 92.91836206 |
| <b>Pd<sub>b</sub></b> | 93.31891681 | 92.94067557 | 92.53712754 |

See below for x,y,z coordinates and energies for **M**, **N**, and **O**.

## Selected Molecular Orbitals of A

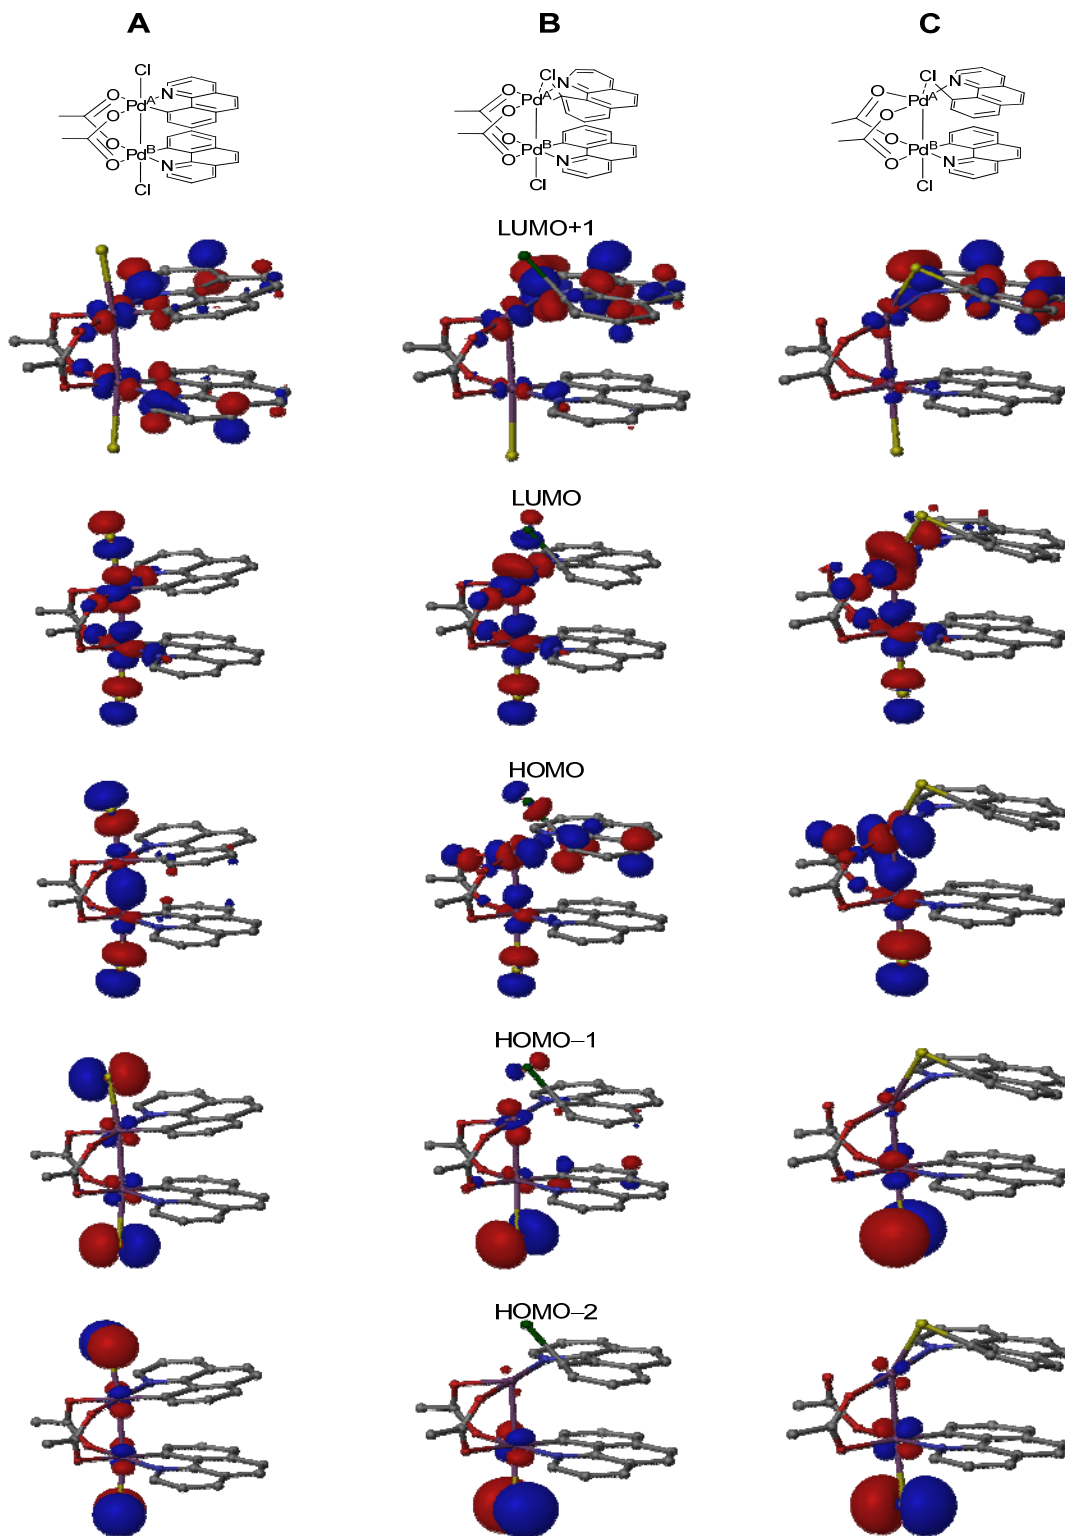

## XYZ coordinates and selected NBO output: NAO, type, occupation, energy

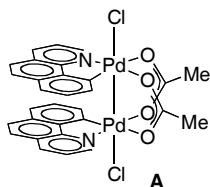

|      |               |               |               |
|------|---------------|---------------|---------------|
| H1   | -3.7833091881 | 0.5696857129  | 0.2825308408  |
| C2   | -2.7153423657 | 0.3593179966  | 0.3015480670  |
| H3   | -2.5646215694 | 0.2616318689  | -1.8419851903 |
| C4   | -2.0381047002 | 0.1886172461  | -0.8920292442 |
| C5   | -0.7189326575 | 0.0160412077  | 1.5738789762  |
| C6   | -0.6641339382 | -0.1178896782 | -0.8830448712 |
| C7   | -2.0703127843 | 0.2635252782  | 1.5535261675  |
| C8   | -0.0232665565 | -0.1959098891 | 0.3701168897  |
| C9   | 0.1225645599  | -0.3788509160 | -2.0540884668 |
| H10  | -2.6290913653 | 0.3751503009  | 2.4799177433  |
| C11  | 1.4336598401  | -0.7390293943 | -1.9731418639 |
| H12  | -0.3613569597 | -0.3016648563 | -3.0267432934 |
| H13  | 2.0056980881  | -0.9525959403 | -2.8743194450 |
| C14  | 2.0900494631  | -0.8649546475 | -0.7053614543 |
| C15  | 3.4158829381  | -1.2848791066 | -0.5092285097 |
| C16  | 1.3428744267  | -0.5596445503 | 0.4443642837  |
| C17  | 3.9174741445  | -1.4009900508 | 0.7727594229  |
| H18  | 4.0353327009  | -1.5301641705 | -1.3703463093 |
| H19  | 4.9312680104  | -1.7457470549 | 0.9507377523  |
| C20  | 3.1096998064  | -1.0704253618 | 1.8663388865  |
| H21  | 3.4500227616  | -1.1588190079 | 2.8954459179  |
| N22  | 1.8702388310  | -0.6344286633 | 1.6918355930  |
| Pd23 | 0.5007579008  | -0.1441599387 | 3.1399043988  |
| Pd24 | 1.1801451363  | 2.3901590695  | 3.2898447250  |
| H25  | 4.8679816245  | 2.2270767525  | -0.3655362694 |
| C26  | 3.8235964984  | 2.4118174924  | -0.1201071161 |
| H27  | 3.2915846202  | 2.8592100403  | -2.1548970588 |
| C28  | 2.9447038348  | 2.7656856757  | -1.1271035092 |
| C29  | 2.0930517562  | 2.5054601129  | 1.5260294029  |
| C30  | 1.5978167229  | 3.0382064308  | -0.8236711962 |
| C31  | 3.4149178807  | 2.2874898635  | 1.2246970674  |
| C32  | 1.1944798059  | 2.8992555151  | 0.5192789313  |
| C33  | 0.6151375159  | 3.4670047750  | -1.7770953659 |
| H34  | 4.1290925225  | 2.0349658775  | 2.0047932897  |
| C35  | -0.6564805875 | 3.7827190539  | -1.4047288874 |
| H36  | 0.9142972553  | 3.5546502816  | -2.8206932244 |
| H37  | -1.3807074288 | 4.1240549455  | -2.1422305014 |
| C38  | -1.0707551253 | 3.6929427857  | -0.0357005836 |
| C39  | -2.3344454425 | 4.0506000387  | 0.4614887195  |
| C40  | -0.1310231525 | 3.2220737796  | 0.8961287503  |
| C41  | -2.5936965708 | 3.9519300666  | 1.8148352807  |

|      |               |               |               |
|------|---------------|---------------|---------------|
| H42  | -3.0975140225 | 4.4174046301  | -0.2230653378 |
| H43  | -3.5547458244 | 4.2445941642  | 2.2259736364  |
| C44  | -1.6044990879 | 3.4666029229  | 2.6771278248  |
| H45  | -1.7515055658 | 3.3830541344  | 3.7513845934  |
| N46  | -0.4224281679 | 3.0868310182  | 2.2137084000  |
| C47  | -0.8247303627 | 1.3197755841  | 5.2701939265  |
| O48  | 0.0020872578  | 2.2516682710  | 5.1414455120  |
| O49  | -0.9645309978 | 0.3245296948  | 4.4800753766  |
| C50  | 2.8519728765  | 0.6196722665  | 4.8691910830  |
| O51  | 2.0014418745  | -0.2906919627 | 4.7427448309  |
| O52  | 2.8591042406  | 1.7340651094  | 4.2428319282  |
| C53  | -1.7593295210 | 1.3327946178  | 6.4464190981  |
| H54  | -1.8939138723 | 2.3509989786  | 6.8173790797  |
| H55  | -1.3142390352 | 0.7272957487  | 7.2433852598  |
| H56  | -2.7167342202 | 0.8767420000  | 6.1835207314  |
| C57  | 3.9901718153  | 0.4294943757  | 5.8310962770  |
| H58  | 4.9051959542  | 0.8757829338  | 5.4336452205  |
| H59  | 4.1325092766  | -0.6295909182 | 6.0544098828  |
| H60  | 3.7475096579  | 0.9582669461  | 6.7589195938  |
| CI61 | 1.8142372927  | 4.7027919074  | 3.6747208526  |
| CI62 | -0.0819620829 | -2.5013288355 | 3.2532183990  |

|     |          |          |         |          |
|-----|----------|----------|---------|----------|
| 367 | Pd 23 s  | Cor( 4s) | 1.99339 | -3.33249 |
| 368 | Pd 23 s  | Val( 5s) | 0.36692 | 0.58991  |
| 369 | Pd 23 s  | Ryd( 6s) | 0.00203 | 1.32276  |
| 370 | Pd 23 s  | Ryd(11s) | 0.00090 | 21.56905 |
| 371 | Pd 23 s  | Ryd( 7s) | 0.00037 | 2.49036  |
| 372 | Pd 23 s  | Ryd( 8s) | 0.00003 | 13.96494 |
| 373 | Pd 23 s  | Ryd( 9s) | 0.00001 | 14.20085 |
| 374 | Pd 23 s  | Ryd(10s) | 0.00000 | 18.36333 |
| 375 | Pd 23 px | Cor( 4p) | 1.99617 | -2.12585 |
| 376 | Pd 23 px | Ryd( 5p) | 0.00387 | 1.39094  |
| 377 | Pd 23 px | Ryd( 7p) | 0.00149 | 2.01626  |
| 378 | Pd 23 px | Ryd( 8p) | 0.00052 | 2.92586  |
| 379 | Pd 23 px | Ryd( 6p) | 0.00024 | 1.92190  |
| 380 | Pd 23 px | Ryd( 9p) | 0.00001 | 7.79856  |
| 381 | Pd 23 px | Ryd(10p) | 0.00000 | 11.02085 |
| 382 | Pd 23 py | Cor( 4p) | 1.99772 | -2.12662 |
| 383 | Pd 23 py | Ryd( 7p) | 0.01505 | 1.60778  |
| 384 | Pd 23 py | Ryd( 5p) | 0.00361 | 1.23196  |
| 385 | Pd 23 py | Ryd( 8p) | 0.00017 | 3.12426  |
| 386 | Pd 23 py | Ryd( 6p) | 0.00020 | 1.37807  |
| 387 | Pd 23 py | Ryd( 9p) | 0.00001 | 8.66206  |
| 388 | Pd 23 py | Ryd(10p) | 0.00000 | 11.04897 |
| 389 | Pd 23 pz | Cor( 4p) | 1.99569 | -2.12783 |
| 390 | Pd 23 pz | Ryd( 6p) | 0.00355 | 2.06841  |
| 391 | Pd 23 pz | Ryd( 7p) | 0.00134 | 2.35571  |
| 392 | Pd 23 pz | Ryd( 8p) | 0.00055 | 2.89914  |
| 393 | Pd 23 pz | Ryd( 5p) | 0.00049 | 1.40346  |

|     |             |          |         |          |
|-----|-------------|----------|---------|----------|
| 394 | Pd 23 pz    | Ryd( 9p) | 0.00001 | 7.93210  |
| 395 | Pd 23 pz    | Ryd(10p) | 0.00000 | 11.02576 |
| 396 | Pd 23 dxy   | Val( 4d) | 1.89346 | -0.33748 |
| 397 | Pd 23 dxy   | Ryd( 6d) | 0.00364 | 1.09582  |
| 398 | Pd 23 dxy   | Ryd( 5d) | 0.00114 | 0.92565  |
| 399 | Pd 23 dxy   | Ryd( 7d) | 0.00004 | 2.84264  |
| 400 | Pd 23 dxz   | Val( 4d) | 1.31969 | -0.32112 |
| 401 | Pd 23 dxz   | Ryd( 6d) | 0.00095 | 1.96592  |
| 402 | Pd 23 dxz   | Ryd( 5d) | 0.00109 | 0.84650  |
| 403 | Pd 23 dxz   | Ryd( 7d) | 0.00006 | 2.75318  |
| 404 | Pd 23 dyz   | Val( 4d) | 1.91689 | -0.33941 |
| 405 | Pd 23 dyz   | Ryd( 6d) | 0.00323 | 1.06303  |
| 406 | Pd 23 dyz   | Ryd( 5d) | 0.00157 | 0.78143  |
| 407 | Pd 23 dyz   | Ryd( 7d) | 0.00002 | 2.77142  |
| 408 | Pd 23 dx2y2 | Val( 4d) | 1.74727 | -0.33627 |
| 409 | Pd 23 dx2y2 | Ryd( 6d) | 0.00464 | 1.41261  |
| 410 | Pd 23 dx2y2 | Ryd( 5d) | 0.00093 | 1.24328  |
| 411 | Pd 23 dx2y2 | Ryd( 7d) | 0.00009 | 2.73997  |
| 412 | Pd 23 dz2   | Val( 4d) | 1.85885 | -0.34212 |
| 413 | Pd 23 dz2   | Ryd( 6d) | 0.00315 | 1.25823  |
| 414 | Pd 23 dz2   | Ryd( 5d) | 0.00079 | 0.70399  |
| 415 | Pd 23 dz2   | Ryd( 7d) | 0.00007 | 2.63729  |
| 416 | Pd 23 f(0)  | Ryd( 4f) | 0.00036 | 1.63454  |
| 417 | Pd 23 f(0)  | Ryd( 5f) | 0.00001 | 4.42492  |
| 418 | Pd 23 f(c1) | Ryd( 4f) | 0.00090 | 1.85411  |
| 419 | Pd 23 f(c1) | Ryd( 5f) | 0.00004 | 4.59355  |
| 420 | Pd 23 f(s1) | Ryd( 4f) | 0.00037 | 1.57419  |
| 421 | Pd 23 f(s1) | Ryd( 5f) | 0.00001 | 4.36817  |
| 422 | Pd 23 f(c2) | Ryd( 4f) | 0.00080 | 1.78639  |
| 423 | Pd 23 f(c2) | Ryd( 5f) | 0.00003 | 4.53971  |
| 424 | Pd 23 f(s2) | Ryd( 4f) | 0.00053 | 1.61989  |
| 425 | Pd 23 f(s2) | Ryd( 5f) | 0.00001 | 4.39964  |
| 426 | Pd 23 f(c3) | Ryd( 4f) | 0.00039 | 1.63256  |
| 427 | Pd 23 f(c3) | Ryd( 5f) | 0.00001 | 4.42133  |
| 428 | Pd 23 f(s3) | Ryd( 4f) | 0.00044 | 1.62953  |
| 429 | Pd 23 f(s3) | Ryd( 5f) | 0.00001 | 4.40887  |
| 430 | Pd 24 s     | Cor( 4s) | 1.99335 | -3.33214 |
| 431 | Pd 24 s     | Val( 5s) | 0.36698 | 0.58970  |
| 432 | Pd 24 s     | Ryd( 6s) | 0.00205 | 1.24125  |
| 433 | Pd 24 s     | Ryd(11s) | 0.00093 | 21.64574 |
| 434 | Pd 24 s     | Ryd( 7s) | 0.00037 | 2.39417  |
| 435 | Pd 24 s     | Ryd( 8s) | 0.00003 | 14.08603 |
| 436 | Pd 24 s     | Ryd( 9s) | 0.00001 | 14.58689 |
| 437 | Pd 24 s     | Ryd(10s) | 0.00000 | 19.30408 |
| 438 | Pd 24 px    | Cor( 4p) | 1.99690 | -2.12617 |
| 439 | Pd 24 px    | Ryd( 5p) | 0.00396 | 1.28487  |
| 440 | Pd 24 px    | Ryd( 7p) | 0.00152 | 1.87952  |
| 441 | Pd 24 px    | Ryd( 8p) | 0.00054 | 3.10675  |
| 442 | Pd 24 px    | Ryd( 6p) | 0.00026 | 1.78116  |

---

|     |             |          |         |          |
|-----|-------------|----------|---------|----------|
| 443 | Pd 24 px    | Ryd( 9p) | 0.00001 | 7.66953  |
| 444 | Pd 24 px    | Ryd(10p) | 0.00000 | 11.01170 |
| 445 | Pd 24 py    | Cor( 4p) | 1.99772 | -2.12710 |
| 446 | Pd 24 py    | Ryd( 7p) | 0.01531 | 1.57173  |
| 447 | Pd 24 py    | Ryd( 5p) | 0.00351 | 1.28496  |
| 448 | Pd 24 py    | Ryd( 8p) | 0.00020 | 3.26698  |
| 449 | Pd 24 py    | Ryd( 6p) | 0.00020 | 1.44256  |
| 450 | Pd 24 py    | Ryd( 9p) | 0.00001 | 8.34282  |
| 451 | Pd 24 py    | Ryd(10p) | 0.00000 | 11.03369 |
| 452 | Pd 24 pz    | Cor( 4p) | 1.99493 | -2.12686 |
| 453 | Pd 24 pz    | Ryd( 6p) | 0.00345 | 2.15722  |
| 454 | Pd 24 pz    | Ryd( 7p) | 0.00148 | 2.48511  |
| 455 | Pd 24 pz    | Ryd( 8p) | 0.00052 | 3.02192  |
| 456 | Pd 24 pz    | Ryd( 5p) | 0.00052 | 1.09029  |
| 457 | Pd 24 pz    | Ryd( 9p) | 0.00001 | 8.13171  |
| 458 | Pd 24 pz    | Ryd(10p) | 0.00000 | 11.04090 |
| 459 | Pd 24 dxy   | Val( 4d) | 1.81247 | -0.33487 |
| 460 | Pd 24 dxy   | Ryd( 6d) | 0.00349 | 1.21788  |
| 461 | Pd 24 dxy   | Ryd( 5d) | 0.00117 | 0.97553  |
| 462 | Pd 24 dxy   | Ryd( 7d) | 0.00004 | 2.87034  |
| 463 | Pd 24 dxz   | Val( 4d) | 1.50615 | -0.32650 |
| 464 | Pd 24 dxz   | Ryd( 6d) | 0.00171 | 1.71963  |
| 465 | Pd 24 dxz   | Ryd( 5d) | 0.00114 | 0.72438  |
| 466 | Pd 24 dxz   | Ryd( 7d) | 0.00005 | 2.67109  |
| 467 | Pd 24 dyz   | Val( 4d) | 1.90970 | -0.33973 |
| 468 | Pd 24 dyz   | Ryd( 6d) | 0.00281 | 1.05900  |
| 469 | Pd 24 dyz   | Ryd( 5d) | 0.00169 | 0.75141  |
| 470 | Pd 24 dyz   | Ryd( 7d) | 0.00002 | 2.75554  |
| 471 | Pd 24 dx2y2 | Val( 4d) | 1.74605 | -0.33606 |
| 472 | Pd 24 dx2y2 | Ryd( 6d) | 0.00497 | 1.42583  |
| 473 | Pd 24 dx2y2 | Ryd( 5d) | 0.00098 | 1.27855  |
| 474 | Pd 24 dx2y2 | Ryd( 7d) | 0.00009 | 2.72771  |
| 475 | Pd 24 dz2   | Val( 4d) | 1.76161 | -0.33964 |
| 476 | Pd 24 dz2   | Ryd( 6d) | 0.00276 | 1.34337  |
| 477 | Pd 24 dz2   | Ryd( 5d) | 0.00089 | 0.73048  |
| 478 | Pd 24 dz2   | Ryd( 7d) | 0.00008 | 2.67286  |
| 479 | Pd 24 f(0)  | Ryd( 4f) | 0.00056 | 1.67714  |
| 480 | Pd 24 f(0)  | Ryd( 5f) | 0.00002 | 4.45994  |
| 481 | Pd 24 f(c1) | Ryd( 4f) | 0.00073 | 1.80697  |
| 482 | Pd 24 f(c1) | Ryd( 5f) | 0.00003 | 4.55999  |
| 483 | Pd 24 f(s1) | Ryd( 4f) | 0.00037 | 1.60453  |
| 484 | Pd 24 f(s1) | Ryd( 5f) | 0.00001 | 4.39541  |
| 485 | Pd 24 f(c2) | Ryd( 4f) | 0.00061 | 1.70417  |
| 486 | Pd 24 f(c2) | Ryd( 5f) | 0.00002 | 4.46690  |
| 487 | Pd 24 f(s2) | Ryd( 4f) | 0.00054 | 1.64256  |
| 488 | Pd 24 f(s2) | Ryd( 5f) | 0.00002 | 4.41797  |
| 489 | Pd 24 f(c3) | Ryd( 4f) | 0.00040 | 1.62497  |
| 490 | Pd 24 f(c3) | Ryd( 5f) | 0.00001 | 4.41510  |
| 491 | Pd 24 f(s3) | Ryd( 4f) | 0.00058 | 1.67396  |



492 Pd 24 f(s3) Ryd( 5f) 0.00002 4.44045

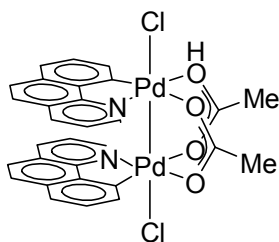**A+H<sup>+</sup>**<sub>Ob</sub>

|     |               |               |               |
|-----|---------------|---------------|---------------|
| Pd1 | 6.8057630819  | 3.7576372946  | 5.9174916173  |
| Pd2 | 6.6280627856  | 1.0839298361  | 6.0347599021  |
| O3  | 5.1546258863  | 3.4747375059  | 4.4683088024  |
| O4  | 4.4087144214  | 1.5759237069  | 5.2772169202  |
| C5  | 4.1573102326  | 2.5830400076  | 4.6485745429  |
| C6  | 2.8488746979  | 2.9250644640  | 4.0293315688  |
| H7  | 2.9533819252  | 2.9315899635  | 2.9384460469  |
| H8  | 2.5272295974  | 3.9289205004  | 4.3308073954  |
| H9  | 2.0986579502  | 2.1879635860  | 4.3155022925  |
| N10 | 8.2940193119  | 3.7858965550  | 7.3149222781  |
| N11 | 6.0210480976  | 1.0023478921  | 8.0122124443  |
| C12 | 5.6664283456  | 4.2005159143  | 7.5136085466  |
| C13 | 4.3223357706  | 4.4740782548  | 7.5721094096  |
| H14 | 3.7072042843  | 4.5418081096  | 6.6777213063  |
| C15 | 3.7419408766  | 4.7309309366  | 8.8346015805  |
| H16 | 2.6778126755  | 4.9520055969  | 8.8813803209  |
| C17 | 4.4886891522  | 4.7379778526  | 9.9966607286  |
| H18 | 4.0156294595  | 4.9580373941  | 10.9515918290 |
| C19 | 5.8750884271  | 4.4965114961  | 9.9472873295  |
| C20 | 6.4421482331  | 4.2275183183  | 8.6858540688  |
| C21 | 7.8341048344  | 4.0226320914  | 8.5696522503  |
| C22 | 8.6935797231  | 4.0881564719  | 9.6768844313  |
| C23 | 10.0671552226 | 3.9228798038  | 9.4259795860  |
| H24 | 10.7740276794 | 3.9642315169  | 10.2528551082 |
| C25 | 10.5135227487 | 3.7227916950  | 8.1332126309  |
| H26 | 11.5702237728 | 3.6033442703  | 7.9148710923  |
| C27 | 9.5934083638  | 3.6557096343  | 7.0801282927  |
| H28 | 9.8852673648  | 3.4825846583  | 6.0466136689  |
| C29 | 8.4134308649  | 0.6262832184  | 6.8295012068  |
| C30 | 9.5666755931  | 0.3181232999  | 6.1624492338  |
| H31 | 9.6048656923  | 0.2547809116  | 5.0785261633  |
| C32 | 10.7122094028 | 0.0463191479  | 6.9470854064  |
| H33 | 11.6418180990 | -0.1919140077 | 6.4351144859  |
| C34 | 10.6745103686 | 0.0487567423  | 8.3276229056  |
| H35 | 11.5695216351 | -0.1876187929 | 8.8992567090  |
| C36 | 9.4650796591  | 0.3010375834  | 9.0068030864  |
| C37 | 8.3259499344  | 0.5880316658  | 8.2272521489  |
| C38 | 7.0667135811  | 0.7711350405  | 8.8440206306  |
| C39 | 6.9092480816  | 0.6728014067  | 10.2349202060 |
| C40 | 5.6028190491  | 0.8139871376  | 10.7366152753 |
| H41 | 5.4283172289  | 0.7435673075  | 11.8087283157 |
| C42 | 4.5490574246  | 1.0211666004  | 9.8676349384  |
| H43 | 3.5308128435  | 1.1184117708  | 10.2308945590 |
| C44 | 4.7903070638  | 1.1051863844  | 8.4907890572  |
| H45 | 3.9941392816  | 1.2597646986  | 7.7658830606  |
| C46 | 8.0820929485  | 0.4198309808  | 11.0186205293 |
| H47 | 7.9765258474  | 0.3497242194  | 12.0992444477 |
| C48 | 9.2990361445  | 0.2445530663  | 10.4308556793 |
| H49 | 10.1732628759 | 0.0297963828  | 11.0428247110 |
| C50 | 6.7529884951  | 4.5230836269  | 11.0830299948 |

|      |              |               |               |
|------|--------------|---------------|---------------|
| H51  | 6.3220843558 | 4.7226793160  | 12.0626263506 |
| C52  | 8.0963101185 | 4.3318311103  | 10.9570095057 |
| H53  | 8.7448269699 | 4.3768421106  | 11.8291815400 |
| O54  | 7.3719691767 | 1.1173125110  | 4.1298939818  |
| Cl55 | 6.2643096666 | -1.2546347363 | 5.8645394959  |
| O56  | 8.1759086555 | 3.2213055985  | 4.2805409163  |
| C57  | 8.0157932519 | 2.1345600979  | 3.6833739423  |
| C58  | 8.6515107364 | 1.9388449005  | 2.3376669937  |
| H59  | 8.1781858547 | 1.1220760862  | 1.7906333040  |
| H60  | 8.6096099981 | 2.8707026103  | 1.7694580748  |
| H61  | 9.7084601196 | 1.6885463875  | 2.4884529438  |
| Cl62 | 6.2264450490 | 6.0506828295  | 5.0734072771  |
| H63  | 4.9615033201 | 4.4155389767  | 4.2131577387  |

| NAO | Atom | No | lang | Type (AO) | Occupancy | Energy |
|-----|------|----|------|-----------|-----------|--------|
|-----|------|----|------|-----------|-----------|--------|

|    |    |   |       |          |         |          |
|----|----|---|-------|----------|---------|----------|
| 1  | Pd | 1 | s     | Cor( 4s) | 1.99354 | -3.44865 |
| 2  | Pd | 1 | s     | Val( 5s) | 0.35260 | 0.44378  |
| 3  | Pd | 1 | s     | Ryd( 6s) | 0.00200 | 1.18265  |
| 4  | Pd | 1 | s     | Ryd(11s) | 0.00102 | 22.67702 |
| 5  | Pd | 1 | s     | Ryd( 7s) | 0.00033 | 2.30094  |
| 6  | Pd | 1 | s     | Ryd( 8s) | 0.00002 | 11.24691 |
| 7  | Pd | 1 | s     | Ryd( 9s) | 0.00000 | 13.74832 |
| 8  | Pd | 1 | s     | Ryd(10s) | 0.00000 | 15.33564 |
| 9  | Pd | 1 | px    | Cor( 4p) | 1.99520 | -2.23526 |
| 10 | Pd | 1 | px    | Ryd( 5p) | 0.00327 | 1.19896  |
| 11 | Pd | 1 | px    | Ryd( 7p) | 0.00118 | 1.98132  |
| 12 | Pd | 1 | px    | Ryd( 8p) | 0.00051 | 3.17996  |
| 13 | Pd | 1 | px    | Ryd( 6p) | 0.00032 | 1.97845  |
| 14 | Pd | 1 | px    | Ryd( 9p) | 0.00001 | 7.01019  |
| 15 | Pd | 1 | px    | Ryd(10p) | 0.00000 | 10.90905 |
| 16 | Pd | 1 | py    | Cor( 4p) | 1.99758 | -2.23269 |
| 17 | Pd | 1 | py    | Ryd( 7p) | 0.01588 | 1.61345  |
| 18 | Pd | 1 | py    | Ryd( 6p) | 0.00294 | 1.12825  |
| 19 | Pd | 1 | py    | Ryd( 8p) | 0.00025 | 3.33119  |
| 20 | Pd | 1 | py    | Ryd( 5p) | 0.00016 | 0.98815  |
| 21 | Pd | 1 | py    | Ryd( 9p) | 0.00002 | 8.44090  |
| 22 | Pd | 1 | py    | Ryd(10p) | 0.00000 | 10.99424 |
| 23 | Pd | 1 | pz    | Cor( 4p) | 1.99614 | -2.23670 |
| 24 | Pd | 1 | pz    | Ryd( 6p) | 0.00375 | 1.89754  |
| 25 | Pd | 1 | pz    | Ryd( 7p) | 0.00165 | 2.17479  |
| 26 | Pd | 1 | pz    | Ryd( 8p) | 0.00056 | 2.84161  |
| 27 | Pd | 1 | pz    | Ryd( 5p) | 0.00031 | 1.08316  |
| 28 | Pd | 1 | pz    | Ryd( 9p) | 0.00001 | 7.65741  |
| 29 | Pd | 1 | pz    | Ryd(10p) | 0.00000 | 10.96568 |
| 30 | Pd | 1 | dxy   | Val( 4d) | 1.96336 | -0.44898 |
| 31 | Pd | 1 | dxy   | Ryd( 6d) | 0.00311 | 0.89836  |
| 32 | Pd | 1 | dxy   | Ryd( 5d) | 0.00100 | 0.71785  |
| 33 | Pd | 1 | dxy   | Ryd( 7d) | 0.00004 | 2.73790  |
| 34 | Pd | 1 | dxz   | Val( 4d) | 1.32607 | -0.43071 |
| 35 | Pd | 1 | dxz   | Ryd( 6d) | 0.00142 | 1.72719  |
| 36 | Pd | 1 | dxz   | Ryd( 5d) | 0.00101 | 0.87118  |
| 37 | Pd | 1 | dxz   | Ryd( 7d) | 0.00006 | 2.67113  |
| 38 | Pd | 1 | dyz   | Val( 4d) | 1.90411 | -0.44916 |
| 39 | Pd | 1 | dyz   | Ryd( 6d) | 0.00301 | 0.94703  |
| 40 | Pd | 1 | dyz   | Ryd( 5d) | 0.00202 | 0.73074  |
| 41 | Pd | 1 | dyz   | Ryd( 7d) | 0.00004 | 2.78809  |
| 42 | Pd | 1 | dx2y2 | Val( 4d) | 1.74178 | -0.44453 |
| 43 | Pd | 1 | dx2y2 | Ryd( 6d) | 0.00392 | 1.35865  |

|     |    |   |       |          |         |          |
|-----|----|---|-------|----------|---------|----------|
| 44  | Pd | 1 | dx2y2 | Ryd( 5d) | 0.00187 | 1.18481  |
| 45  | Pd | 1 | dx2y2 | Ryd( 7d) | 0.00007 | 2.68128  |
| 46  | Pd | 1 | dz2   | Val( 4d) | 1.88741 | -0.45198 |
| 47  | Pd | 1 | dz2   | Ryd( 6d) | 0.00300 | 1.14613  |
| 48  | Pd | 1 | dz2   | Ryd( 5d) | 0.00127 | 0.62928  |
| 49  | Pd | 1 | dz2   | Ryd( 7d) | 0.00007 | 2.58228  |
| 50  | Pd | 1 | f(0)  | Ryd( 4f) | 0.00028 | 1.51303  |
| 51  | Pd | 1 | f(0)  | Ryd( 5f) | 0.00001 | 4.30021  |
| 52  | Pd | 1 | f(c1) | Ryd( 4f) | 0.00064 | 1.71756  |
| 53  | Pd | 1 | f(c1) | Ryd( 5f) | 0.00003 | 4.46066  |
| 54  | Pd | 1 | f(s1) | Ryd( 4f) | 0.00027 | 1.48567  |
| 55  | Pd | 1 | f(s1) | Ryd( 5f) | 0.00001 | 4.27844  |
| 56  | Pd | 1 | f(c2) | Ryd( 4f) | 0.00069 | 1.66893  |
| 57  | Pd | 1 | f(c2) | Ryd( 5f) | 0.00003 | 4.42570  |
| 58  | Pd | 1 | f(s2) | Ryd( 4f) | 0.00042 | 1.48958  |
| 59  | Pd | 1 | f(s2) | Ryd( 5f) | 0.00001 | 4.26956  |
| 60  | Pd | 1 | f(c3) | Ryd( 4f) | 0.00027 | 1.47729  |
| 61  | Pd | 1 | f(c3) | Ryd( 5f) | 0.00001 | 4.26582  |
| 62  | Pd | 1 | f(s3) | Ryd( 4f) | 0.00028 | 1.53081  |
| 63  | Pd | 1 | f(s3) | Ryd( 5f) | 0.00001 | 4.32186  |
| 64  | Pd | 2 | s     | Cor( 4s) | 1.99357 | -3.45926 |
| 65  | Pd | 2 | s     | Val( 5s) | 0.36706 | 0.43828  |
| 66  | Pd | 2 | s     | Ryd( 6s) | 0.00256 | 2.34445  |
| 67  | Pd | 2 | s     | Ryd(11s) | 0.00094 | 20.09213 |
| 68  | Pd | 2 | s     | Ryd( 7s) | 0.00036 | 2.40940  |
| 69  | Pd | 2 | s     | Ryd( 8s) | 0.00002 | 12.59189 |
| 70  | Pd | 2 | s     | Ryd(10s) | 0.00001 | 16.76315 |
| 71  | Pd | 2 | s     | Ryd( 9s) | 0.00000 | 16.06707 |
| 72  | Pd | 2 | px    | Cor( 4p) | 1.99309 | -2.24762 |
| 73  | Pd | 2 | px    | Ryd( 6p) | 0.00340 | 1.53841  |
| 74  | Pd | 2 | px    | Ryd( 7p) | 0.00148 | 2.30672  |
| 75  | Pd | 2 | px    | Ryd( 8p) | 0.00041 | 3.05804  |
| 76  | Pd | 2 | px    | Ryd( 5p) | 0.00031 | 1.49010  |
| 77  | Pd | 2 | px    | Ryd( 9p) | 0.00001 | 7.41647  |
| 78  | Pd | 2 | px    | Ryd(10p) | 0.00000 | 11.04276 |
| 79  | Pd | 2 | py    | Cor( 4p) | 1.99741 | -2.25112 |
| 80  | Pd | 2 | py    | Ryd( 7p) | 0.01283 | 1.37062  |
| 81  | Pd | 2 | py    | Ryd( 5p) | 0.00453 | 1.03299  |
| 82  | Pd | 2 | py    | Ryd( 8p) | 0.00016 | 3.47026  |
| 83  | Pd | 2 | py    | Ryd( 6p) | 0.00017 | 1.09014  |
| 84  | Pd | 2 | py    | Ryd( 9p) | 0.00001 | 8.16818  |
| 85  | Pd | 2 | py    | Ryd(10p) | 0.00000 | 11.05720 |
| 86  | Pd | 2 | pz    | Cor( 4p) | 1.99737 | -2.24926 |
| 87  | Pd | 2 | pz    | Ryd( 6p) | 0.00396 | 1.65305  |
| 88  | Pd | 2 | pz    | Ryd( 7p) | 0.00142 | 1.87417  |
| 89  | Pd | 2 | pz    | Ryd( 8p) | 0.00058 | 3.35652  |
| 90  | Pd | 2 | pz    | Ryd( 5p) | 0.00037 | 1.08447  |
| 91  | Pd | 2 | pz    | Ryd( 9p) | 0.00001 | 7.47015  |
| 92  | Pd | 2 | pz    | Ryd(10p) | 0.00000 | 11.01943 |
| 93  | Pd | 2 | dxy   | Val( 4d) | 1.92578 | -0.46241 |
| 94  | Pd | 2 | dxy   | Ryd( 6d) | 0.00264 | 0.88904  |
| 95  | Pd | 2 | dxy   | Ryd( 5d) | 0.00175 | 0.67336  |
| 96  | Pd | 2 | dxy   | Ryd( 7d) | 0.00002 | 2.72182  |
| 97  | Pd | 2 | dxz   | Val( 4d) | 1.69099 | -0.45350 |
| 98  | Pd | 2 | dxz   | Ryd( 6d) | 0.00226 | 1.36339  |
| 99  | Pd | 2 | dxz   | Ryd( 5d) | 0.00106 | 0.57474  |
| 100 | Pd | 2 | dxz   | Ryd( 7d) | 0.00004 | 2.53986  |

|     |    |   |                                          |           |         |          |
|-----|----|---|------------------------------------------|-----------|---------|----------|
| 101 | Pd | 2 | d <sub>yz</sub>                          | Val ( 4d) | 1.96611 | -0.46294 |
| 102 | Pd | 2 | d <sub>yz</sub>                          | Ryd ( 6d) | 0.00336 | 0.87805  |
| 103 | Pd | 2 | d <sub>yz</sub>                          | Ryd ( 5d) | 0.00221 | 0.67814  |
| 104 | Pd | 2 | d <sub>yz</sub>                          | Ryd ( 7d) | 0.00003 | 2.66388  |
| 105 | Pd | 2 | d <sub>x<sup>2</sup>-y<sup>2</sup></sub> | Val ( 4d) | 1.65355 | -0.46055 |
| 106 | Pd | 2 | d <sub>x<sup>2</sup>-y<sup>2</sup></sub> | Ryd ( 6d) | 0.00360 | 1.33832  |
| 107 | Pd | 2 | d <sub>x<sup>2</sup>-y<sup>2</sup></sub> | Ryd ( 5d) | 0.00099 | 1.25206  |
| 108 | Pd | 2 | d <sub>x<sup>2</sup>-y<sup>2</sup></sub> | Ryd ( 7d) | 0.00010 | 2.74051  |
| 109 | Pd | 2 | d <sub>z<sup>2</sup></sub>               | Val ( 4d) | 1.51677 | -0.44667 |
| 110 | Pd | 2 | d <sub>z<sup>2</sup></sub>               | Ryd ( 6d) | 0.00207 | 1.54981  |
| 111 | Pd | 2 | d <sub>z<sup>2</sup></sub>               | Ryd ( 5d) | 0.00100 | 0.76743  |
| 112 | Pd | 2 | d <sub>z<sup>2</sup></sub>               | Ryd ( 7d) | 0.00007 | 2.59262  |
| 113 | Pd | 2 | f(0)                                     | Ryd ( 4f) | 0.00075 | 1.67005  |
| 114 | Pd | 2 | f(0)                                     | Ryd ( 5f) | 0.00003 | 4.40743  |
| 115 | Pd | 2 | f(c1)                                    | Ryd ( 4f) | 0.00072 | 1.60320  |
| 116 | Pd | 2 | f(c1)                                    | Ryd ( 5f) | 0.00003 | 4.36319  |
| 117 | Pd | 2 | f(s1)                                    | Ryd ( 4f) | 0.00044 | 1.44641  |
| 118 | Pd | 2 | f(s1)                                    | Ryd ( 5f) | 0.00001 | 4.25207  |
| 119 | Pd | 2 | f(c2)                                    | Ryd ( 4f) | 0.00047 | 1.54608  |
| 120 | Pd | 2 | f(c2)                                    | Ryd ( 5f) | 0.00002 | 4.32668  |
| 121 | Pd | 2 | f(s2)                                    | Ryd ( 4f) | 0.00023 | 1.42056  |
| 122 | Pd | 2 | f(s2)                                    | Ryd ( 5f) | 0.00001 | 4.22647  |
| 123 | Pd | 2 | f(c3)                                    | Ryd ( 4f) | 0.00046 | 1.50621  |
| 124 | Pd | 2 | f(c3)                                    | Ryd ( 5f) | 0.00001 | 4.29581  |
| 125 | Pd | 2 | f(s3)                                    | Ryd ( 4f) | 0.00052 | 1.55530  |
| 126 | Pd | 2 | f(s3)                                    | Ryd ( 5f) | 0.00002 | 4.34584  |

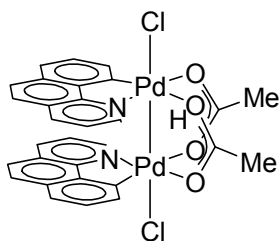

**A+H<sup>+</sup>**<sub>Oa</sub>

|     |              |              |               |
|-----|--------------|--------------|---------------|
| Pd1 | 6.8252902392 | 3.6931175682 | 5.9512042631  |
| Pd2 | 6.5616514881 | 1.0435993327 | 6.0728152962  |
| O3  | 5.2710568940 | 3.5645625528 | 4.6026755669  |
| O4  | 4.5281956403 | 1.5749551298 | 5.3558929718  |
| C5  | 4.4174997844 | 2.6023950664 | 4.6551834185  |
| C6  | 3.2160887781 | 2.7751911747 | 3.7726201149  |
| H7  | 3.4925681429 | 2.5134932297 | 2.7449964182  |
| H8  | 2.8880197285 | 3.8178288956 | 3.7679747367  |
| H9  | 2.4125786110 | 2.1090532739 | 4.0911734628  |
| N10 | 8.2810496122 | 3.7985690994 | 7.4236107361  |
| N11 | 5.9909258379 | 1.0226175862 | 8.0166924975  |
| C12 | 5.6240442989 | 4.1838218607 | 7.4677643179  |
| C13 | 4.2897234810 | 4.4900141866 | 7.4071099350  |
| H14 | 3.7394313338 | 4.4973040123 | 6.4710317154  |
| C15 | 3.6465138282 | 4.8342816360 | 8.6188759257  |
| H16 | 2.5870054585 | 5.0784706753 | 8.5878338409  |
| C17 | 4.3211149464 | 4.8807349302 | 9.8226590925  |
| H18 | 3.7950582177 | 5.1569588754 | 10.7342416415 |
| C19 | 5.7025000707 | 4.6090356636 | 9.8753491219  |
| C20 | 6.3452039609 | 4.2657275112 | 8.6689437826  |
| C21 | 7.7444845479 | 4.0631632066 | 8.6410816479  |
| C22 | 8.5276237888 | 4.1736566055 | 9.8005628375  |

|      |               |               |               |
|------|---------------|---------------|---------------|
| C23  | 9.9144018771  | 3.9982722161  | 9.6496439401  |
| H24  | 10.5642411929 | 4.0715246477  | 10.5198140006 |
| C25  | 10.4438182948 | 3.7504211720  | 8.3977211724  |
| H26  | 11.5121709464 | 3.6236121155  | 8.2532396802  |
| C27  | 9.5926193468  | 3.6612140921  | 7.2900598900  |
| H28  | 9.9674077410  | 3.4667250860  | 6.2876532954  |
| C29  | 8.3616421075  | 0.6064963132  | 6.8653498944  |
| C30  | 9.5318179816  | 0.3133522834  | 6.2183792932  |
| H31  | 9.5912831924  | 0.2511401090  | 5.1347726796  |
| C32  | 10.6740760051 | 0.0558883386  | 7.0136544202  |
| H33  | 11.6112565414 | -0.1726844847 | 6.5109176112  |
| C34  | 10.6273194331 | 0.0585885469  | 8.3947378598  |
| H35  | 11.5204104730 | -0.1674378054 | 8.9735588213  |
| C36  | 9.4103357082  | 0.3069888810  | 9.0607624304  |
| C37  | 8.2826669901  | 0.5844956342  | 8.2651139411  |
| C38  | 7.0229270705  | 0.7891544157  | 8.8654056307  |
| C39  | 6.8385432658  | 0.7171162050  | 10.2541284245 |
| C40  | 5.5239934445  | 0.8769644019  | 10.7273144626 |
| H41  | 5.3275096555  | 0.8264954369  | 11.7967340306 |
| C42  | 4.4866266974  | 1.0772418327  | 9.8354241746  |
| H43  | 3.4627723874  | 1.1867515706  | 10.1787974355 |
| C44  | 4.7474850454  | 1.1416577921  | 8.4613625288  |
| H45  | 3.9746708303  | 1.2970426933  | 7.7117910419  |
| C46  | 8.0011528173  | 0.4652458594  | 11.0548466214 |
| H47  | 7.8827855289  | 0.4119979014  | 12.1351515261 |
| C48  | 9.2243217035  | 0.2726917695  | 10.4840754839 |
| H49  | 10.0887848262 | 0.0639396534  | 11.1118628956 |
| C50  | 6.5074653814  | 4.6847568912  | 11.0609808542 |
| H51  | 6.0181772709  | 4.9378493223  | 11.9998806870 |
| C52  | 7.8529737853  | 4.4740582515  | 11.0287985872 |
| H53  | 8.4454574626  | 4.5534520956  | 11.9375481748 |
| O54  | 7.1769017866  | 1.1157168664  | 3.9886239438  |
| Cl55 | 6.2792258260  | -1.3265144870 | 5.9128026074  |
| O56  | 8.2441234596  | 3.0326440632  | 4.1695559597  |
| C57  | 7.6198057919  | 2.1143099099  | 3.4294261503  |
| C58  | 7.4826110263  | 2.3693452373  | 1.9755538425  |
| H59  | 7.0681097573  | 1.4924048544  | 1.4781930244  |
| H60  | 6.7980654165  | 3.2204079570  | 1.8512111126  |
| H61  | 8.4428441474  | 2.6464785904  | 1.5301059000  |
| Cl62 | 7.5961528987  | 5.8091833078  | 4.8721146841  |
| H63  | 8.2917719725  | 3.9513478835  | 3.7926912282  |

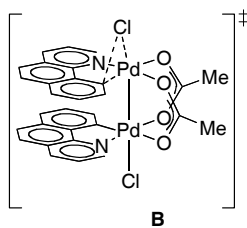

|    |               |               |               |
|----|---------------|---------------|---------------|
| H1 | -3.8680994531 | 0.5471944474  | 0.3715008669  |
| C2 | -2.7959872114 | 0.3563787274  | 0.3732343287  |
| H3 | -2.6781783820 | 0.2626958188  | -1.7727904631 |
| C4 | -2.1347204493 | 0.2003456082  | -0.8310007306 |
| C5 | -0.7737113738 | 0.0346460071  | 1.6085068273  |
| C6 | -0.7557116689 | -0.0788062259 | -0.8471482679 |
| C7 | -2.1285679907 | 0.2623150002  | 1.6115131838  |
| C8 | -0.0890559071 | -0.1495694539 | 0.3932016966  |

---

|      |               |               |               |
|------|---------------|---------------|---------------|
| C9   | 0.0057214918  | -0.3364539238 | -2.0352562910 |
| H10  | -2.6711220369 | 0.3502230981  | 2.5498976281  |
| C11  | 1.3207642876  | -0.6860908076 | -1.9834414286 |
| H12  | -0.5033437372 | -0.2688495622 | -2.9957589826 |
| H13  | 1.8743001117  | -0.9006576664 | -2.8963777725 |
| C14  | 2.0060394184  | -0.7979591601 | -0.7301916615 |
| C15  | 3.3427477932  | -1.1965215463 | -0.5693425749 |
| C16  | 1.2843235189  | -0.4971996634 | 0.4376323808  |
| C17  | 3.8837460761  | -1.2923130413 | 0.6977310283  |
| H18  | 3.9401195494  | -1.4386026483 | -1.4474011337 |
| H19  | 4.9088798422  | -1.6164826008 | 0.8491473955  |
| C20  | 3.0972059414  | -0.9733827639 | 1.8105518673  |
| H21  | 3.4655826393  | -1.0600524191 | 2.8300881766  |
| N22  | 1.8439264849  | -0.5666831864 | 1.6715190435  |
| Pd23 | 0.4472582779  | -0.1800543846 | 3.1721296697  |
| Pd24 | 1.2175891783  | 2.3504819807  | 3.3142177739  |
| H25  | 4.8372415455  | 1.9093357190  | -0.4339229137 |
| C26  | 3.8448272644  | 2.2700804489  | -0.1684317930 |
| H27  | 3.1566930988  | 2.3215650062  | -2.2149233180 |
| C28  | 2.9078207562  | 2.4882280787  | -1.1683959310 |
| C29  | 2.3177013165  | 3.0258176109  | 1.5405953797  |
| C30  | 1.6174089887  | 2.9244061341  | -0.8241640535 |
| C31  | 3.5796472174  | 2.5587072030  | 1.1719106947  |
| C32  | 1.3037272361  | 3.1218796277  | 0.5387878001  |
| C33  | 0.5864841658  | 3.1672596580  | -1.7937475327 |
| H34  | 4.3588241918  | 2.4846109633  | 1.9268026798  |
| C35  | -0.6656059335 | 3.5544013429  | -1.4321196817 |
| H36  | 0.8390536146  | 3.0396133199  | -2.8458565838 |
| H37  | -1.4264648148 | 3.7550300513  | -2.1847943477 |
| C38  | -1.0359939977 | 3.6303250904  | -0.0509967481 |
| C39  | -2.3330805293 | 3.8862151687  | 0.4164731489  |
| C40  | -0.0472805654 | 3.3417045661  | 0.9112589391  |
| C41  | -2.6064809997 | 3.8144216764  | 1.7694707395  |
| H42  | -3.1211100746 | 4.1204222669  | -0.2979973083 |
| H43  | -3.6023917577 | 4.0096410770  | 2.1552983546  |
| C44  | -1.5962344757 | 3.4149876016  | 2.6483687874  |
| H45  | -1.7699029105 | 3.2654222149  | 3.7119955447  |
| N46  | -0.3645563290 | 3.1664438745  | 2.2217509570  |
| C47  | -0.9458617961 | 1.2423802097  | 5.3060428360  |
| O48  | -0.1183945582 | 2.1679463299  | 5.2429759859  |
| O49  | -1.0528670751 | 0.2450188464  | 4.5077082642  |
| C50  | 2.8231707256  | 0.4879366414  | 4.9109828728  |
| O51  | 1.9579545213  | -0.4027393776 | 4.7653821044  |
| O52  | 2.8599308386  | 1.6135074013  | 4.3096000724  |
| C53  | -1.9654633573 | 1.2292698642  | 6.4193320274  |
| H54  | -2.0458449241 | 2.2178461717  | 6.8757575244  |
| H55  | -1.6371188292 | 0.5115964120  | 7.1783834670  |
| H56  | -2.9355205529 | 0.8868647484  | 6.0500859670  |
| C57  | 3.9513464859  | 0.2360226331  | 5.8756222560  |

|      |               |               |              |
|------|---------------|---------------|--------------|
| H58  | 4.8103582701  | 0.8709954606  | 5.6488985213 |
| H59  | 4.2286305636  | -0.8212203440 | 5.8608935035 |
| H60  | 3.6034518382  | 0.4745668371  | 6.8864080383 |
| CI61 | 2.4370207308  | 4.5354877243  | 2.7982931542 |
| CI62 | -0.1491265467 | -2.5585063023 | 3.1572621587 |

|     |             |          |         |          |
|-----|-------------|----------|---------|----------|
| 367 | Pd 23 s     | Cor( 4s) | 1.99308 | -3.32001 |
| 368 | Pd 23 s     | Val( 5s) | 0.36087 | 0.58622  |
| 369 | Pd 23 s     | Ryd( 6s) | 0.00204 | 1.16148  |
| 370 | Pd 23 s     | Ryd(11s) | 0.00097 | 20.52464 |
| 371 | Pd 23 s     | Ryd( 7s) | 0.00040 | 2.67426  |
| 372 | Pd 23 s     | Ryd( 9s) | 0.00003 | 14.46000 |
| 373 | Pd 23 s     | Ryd( 8s) | 0.00001 | 11.04868 |
| 374 | Pd 23 s     | Ryd(10s) | 0.00000 | 16.80926 |
| 375 | Pd 23 px    | Cor( 4p) | 1.99640 | -2.11112 |
| 376 | Pd 23 px    | Ryd( 5p) | 0.00367 | 1.29662  |
| 377 | Pd 23 px    | Ryd( 7p) | 0.00130 | 2.09338  |
| 378 | Pd 23 px    | Ryd( 8p) | 0.00054 | 2.77359  |
| 379 | Pd 23 px    | Ryd( 6p) | 0.00025 | 1.59922  |
| 380 | Pd 23 px    | Ryd( 9p) | 0.00001 | 8.10667  |
| 381 | Pd 23 px    | Ryd(10p) | 0.00000 | 11.17560 |
| 382 | Pd 23 py    | Cor( 4p) | 1.99787 | -2.11128 |
| 383 | Pd 23 py    | Ryd( 7p) | 0.01203 | 1.62649  |
| 384 | Pd 23 py    | Ryd( 5p) | 0.00335 | 1.21314  |
| 385 | Pd 23 py    | Ryd( 8p) | 0.00017 | 2.95797  |
| 386 | Pd 23 py    | Ryd( 6p) | 0.00022 | 1.30314  |
| 387 | Pd 23 py    | Ryd( 9p) | 0.00001 | 8.82701  |
| 388 | Pd 23 py    | Ryd(10p) | 0.00000 | 11.21489 |
| 389 | Pd 23 pz    | Cor( 4p) | 1.99572 | -2.11338 |
| 390 | Pd 23 pz    | Ryd( 6p) | 0.00354 | 1.84571  |
| 391 | Pd 23 pz    | Ryd( 7p) | 0.00121 | 2.55007  |
| 392 | Pd 23 pz    | Ryd( 8p) | 0.00057 | 2.76999  |
| 393 | Pd 23 pz    | Ryd( 5p) | 0.00047 | 1.26002  |
| 394 | Pd 23 pz    | Ryd( 9p) | 0.00001 | 8.24686  |
| 395 | Pd 23 pz    | Ryd(10p) | 0.00000 | 11.16920 |
| 396 | Pd 23 dxy   | Val( 4d) | 1.90913 | -0.32346 |
| 397 | Pd 23 dxy   | Ryd( 6d) | 0.00353 | 1.07326  |
| 398 | Pd 23 dxy   | Ryd( 5d) | 0.00115 | 1.04427  |
| 399 | Pd 23 dxy   | Ryd( 7d) | 0.00004 | 2.82375  |
| 400 | Pd 23 dxz   | Val( 4d) | 1.30700 | -0.30490 |
| 401 | Pd 23 dxz   | Ryd( 6d) | 0.00102 | 1.90296  |
| 402 | Pd 23 dxz   | Ryd( 5d) | 0.00112 | 0.93302  |
| 403 | Pd 23 dxz   | Ryd( 7d) | 0.00005 | 2.63624  |
| 404 | Pd 23 dyz   | Val( 4d) | 1.92586 | -0.32480 |
| 405 | Pd 23 dyz   | Ryd( 6d) | 0.00328 | 1.00798  |
| 406 | Pd 23 dyz   | Ryd( 5d) | 0.00160 | 0.75644  |
| 407 | Pd 23 dyz   | Ryd( 7d) | 0.00002 | 2.76908  |
| 408 | Pd 23 dx2y2 | Val( 4d) | 1.74551 | -0.32075 |
| 409 | Pd 23 dx2y2 | Ryd( 6d) | 0.00418 | 1.39854  |

|     |                      |         |          |
|-----|----------------------|---------|----------|
| 410 | Pd 23 dx2y2 Ryd( 5d) | 0.00093 | 1.30611  |
| 411 | Pd 23 dx2y2 Ryd( 7d) | 0.00008 | 2.77053  |
| 412 | Pd 23 dz2 Val( 4d)   | 1.86008 | -0.32736 |
| 413 | Pd 23 dz2 Ryd( 6d)   | 0.00294 | 1.20541  |
| 414 | Pd 23 dz2 Ryd( 5d)   | 0.00070 | 0.74941  |
| 415 | Pd 23 dz2 Ryd( 7d)   | 0.00006 | 2.66051  |
| 416 | Pd 23 f(0) Ryd( 4f)  | 0.00034 | 1.63826  |
| 417 | Pd 23 f(0) Ryd( 5f)  | 0.00001 | 4.43226  |
| 418 | Pd 23 f(c1) Ryd( 4f) | 0.00086 | 1.86455  |
| 419 | Pd 23 f(c1) Ryd( 5f) | 0.00004 | 4.60020  |
| 420 | Pd 23 f(s1) Ryd( 4f) | 0.00036 | 1.57129  |
| 421 | Pd 23 f(s1) Ryd( 5f) | 0.00001 | 4.37255  |
| 422 | Pd 23 f(c2) Ryd( 4f) | 0.00076 | 1.80595  |
| 423 | Pd 23 f(c2) Ryd( 5f) | 0.00003 | 4.55163  |
| 424 | Pd 23 f(s2) Ryd( 4f) | 0.00045 | 1.61386  |
| 425 | Pd 23 f(s2) Ryd( 5f) | 0.00001 | 4.39661  |
| 426 | Pd 23 f(c3) Ryd( 4f) | 0.00038 | 1.64603  |
| 427 | Pd 23 f(c3) Ryd( 5f) | 0.00001 | 4.44123  |
| 428 | Pd 23 f(s3) Ryd( 4f) | 0.00040 | 1.61043  |
| 429 | Pd 23 f(s3) Ryd( 5f) | 0.00001 | 4.39875  |
| 430 | Pd 24 s Cor( 4s)     | 1.99494 | -3.31579 |
| 431 | Pd 24 s Val( 5s)     | 0.34813 | 0.46462  |
| 432 | Pd 24 s Ryd( 9s)     | 0.00138 | 11.58833 |
| 433 | Pd 24 s Ryd( 7s)     | 0.00049 | 5.76185  |
| 434 | Pd 24 s Ryd( 8s)     | 0.00043 | 7.43651  |
| 435 | Pd 24 s Ryd( 6s)     | 0.00003 | 4.38217  |
| 436 | Pd 24 s Ryd(10s)     | 0.00000 | 12.92872 |
| 437 | Pd 24 s Ryd(11s)     | 0.00000 | 18.17934 |
| 438 | Pd 24 px Cor( 4p)    | 1.99747 | -2.08832 |
| 439 | Pd 24 px Ryd( 6p)    | 0.00309 | 0.97858  |
| 440 | Pd 24 px Ryd( 7p)    | 0.00095 | 1.42787  |
| 441 | Pd 24 px Ryd( 5p)    | 0.00047 | 0.74243  |
| 442 | Pd 24 px Ryd( 8p)    | 0.00037 | 3.53234  |
| 443 | Pd 24 px Ryd( 9p)    | 0.00001 | 8.93549  |
| 444 | Pd 24 px Ryd(10p)    | 0.00000 | 11.30334 |
| 445 | Pd 24 py Cor( 4p)    | 1.99736 | -2.08975 |
| 446 | Pd 24 py Ryd( 6p)    | 0.01028 | 1.25128  |
| 447 | Pd 24 py Ryd( 7p)    | 0.00170 | 1.38068  |
| 448 | Pd 24 py Ryd( 5p)    | 0.00036 | 0.79183  |
| 449 | Pd 24 py Ryd( 8p)    | 0.00021 | 3.28790  |
| 450 | Pd 24 py Ryd( 9p)    | 0.00001 | 9.11165  |
| 451 | Pd 24 py Ryd(10p)    | 0.00000 | 11.32994 |
| 452 | Pd 24 pz Cor( 4p)    | 1.99649 | -2.08131 |
| 453 | Pd 24 pz Ryd( 7p)    | 0.00354 | 1.37358  |
| 454 | Pd 24 pz Ryd( 6p)    | 0.00114 | 1.35795  |
| 455 | Pd 24 pz Ryd( 5p)    | 0.00050 | 0.71666  |
| 456 | Pd 24 pz Ryd( 8p)    | 0.00024 | 3.33813  |
| 457 | Pd 24 pz Ryd( 9p)    | 0.00001 | 9.11404  |
| 458 | Pd 24 pz Ryd(10p)    | 0.00000 | 11.33040 |



|     |       |       |          |         |          |
|-----|-------|-------|----------|---------|----------|
| 459 | Pd 24 | dxy   | Val( 4d) | 1.70864 | -0.29927 |
| 460 | Pd 24 | dxy   | Ryd( 6d) | 0.00266 | 1.33256  |
| 461 | Pd 24 | dxy   | Ryd( 5d) | 0.00109 | 0.95658  |
| 462 | Pd 24 | dxy   | Ryd( 7d) | 0.00004 | 2.85468  |
| 463 | Pd 24 | dxz   | Val( 4d) | 1.59032 | -0.28760 |
| 464 | Pd 24 | dxz   | Ryd( 6d) | 0.00177 | 1.64361  |
| 465 | Pd 24 | dxz   | Ryd( 5d) | 0.00086 | 0.86011  |
| 466 | Pd 24 | dxz   | Ryd( 7d) | 0.00005 | 2.63916  |
| 467 | Pd 24 | dyz   | Val( 4d) | 1.92226 | -0.30605 |
| 468 | Pd 24 | dyz   | Ryd( 6d) | 0.00260 | 1.29323  |
| 469 | Pd 24 | dyz   | Ryd( 5d) | 0.00118 | 0.61233  |
| 470 | Pd 24 | dyz   | Ryd( 7d) | 0.00005 | 2.70436  |
| 471 | Pd 24 | dx2y2 | Val( 4d) | 1.80308 | -0.30308 |
| 472 | Pd 24 | dx2y2 | Ryd( 6d) | 0.00325 | 1.31290  |
| 473 | Pd 24 | dx2y2 | Ryd( 5d) | 0.00102 | 1.01025  |
| 474 | Pd 24 | dx2y2 | Ryd( 7d) | 0.00006 | 2.66149  |
| 475 | Pd 24 | dz2   | Val( 4d) | 1.88578 | -0.30165 |
| 476 | Pd 24 | dz2   | Ryd( 6d) | 0.00204 | 1.17809  |
| 477 | Pd 24 | dz2   | Ryd( 5d) | 0.00077 | 0.76687  |
| 478 | Pd 24 | dz2   | Ryd( 7d) | 0.00005 | 2.70687  |
| 479 | Pd 24 | f(0)  | Ryd( 4f) | 0.00035 | 1.65176  |
| 480 | Pd 24 | f(0)  | Ryd( 5f) | 0.00002 | 4.43667  |
| 481 | Pd 24 | f(c1) | Ryd( 4f) | 0.00039 | 1.69714  |
| 482 | Pd 24 | f(c1) | Ryd( 5f) | 0.00001 | 4.47576  |
| 483 | Pd 24 | f(s1) | Ryd( 4f) | 0.00023 | 1.67303  |
| 484 | Pd 24 | f(s1) | Ryd( 5f) | 0.00001 | 4.46301  |
| 485 | Pd 24 | f(c2) | Ryd( 4f) | 0.00032 | 1.66333  |
| 486 | Pd 24 | f(c2) | Ryd( 5f) | 0.00002 | 4.44699  |
| 487 | Pd 24 | f(s2) | Ryd( 4f) | 0.00053 | 1.73545  |
| 488 | Pd 24 | f(s2) | Ryd( 5f) | 0.00002 | 4.49616  |
| 489 | Pd 24 | f(c3) | Ryd( 4f) | 0.00029 | 1.64705  |
| 490 | Pd 24 | f(c3) | Ryd( 5f) | 0.00001 | 4.44143  |
| 491 | Pd 24 | f(s3) | Ryd( 4f) | 0.00036 | 1.67634  |
| 492 | Pd 24 | f(s3) | Ryd( 5f) | 0.00002 | 4.44583  |

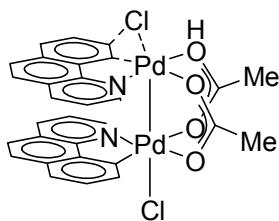

**B+H<sup>+</sup>**<sub>Ob</sub>

|     |              |              |              |
|-----|--------------|--------------|--------------|
| Pd1 | 6.7741204772 | 3.7328080636 | 5.8820442341 |
| Pd2 | 6.6557108947 | 1.0809800861 | 5.9715085455 |
| O3  | 5.0470581693 | 3.5301645058 | 4.3829257094 |
| O4  | 4.4419745988 | 1.6012773962 | 5.2479222118 |
| C5  | 4.1428025884 | 2.5275198246 | 4.5324146067 |
| C6  | 2.8577281163 | 2.6856566052 | 3.7965174752 |
| H7  | 3.0424267354 | 2.7055171709 | 2.7164930624 |
| H8  | 2.3682080484 | 3.6268666289 | 4.0724922847 |
| H9  | 2.2000774854 | 1.8484505590 | 4.0298988794 |

|      |               |               |               |
|------|---------------|---------------|---------------|
| N10  | 8.2729839373  | 3.8319626592  | 7.3204448017  |
| N11  | 6.0923155777  | 1.0959732341  | 7.9757711462  |
| C12  | 5.6371613926  | 4.6923849928  | 7.4623726848  |
| C13  | 4.2544218211  | 4.7427074784  | 7.5616390527  |
| H14  | 3.6508190078  | 4.9652607311  | 6.6844001718  |
| C15  | 3.6499650009  | 4.6597688132  | 8.8273761266  |
| H16  | 2.5655320060  | 4.7188449922  | 8.8887395829  |
| C17  | 4.3988489852  | 4.5979476394  | 9.9877900584  |
| H18  | 3.9164477890  | 4.6207296694  | 10.9624973453 |
| C19  | 5.8026277198  | 4.5156753122  | 9.9102149669  |
| C20  | 6.4132427615  | 4.4858873705  | 8.6377076355  |
| C21  | 7.7936962745  | 4.1762305810  | 8.5430161721  |
| C22  | 8.6192352254  | 4.1363937975  | 9.6831626245  |
| C23  | 9.9845694099  | 3.8722511887  | 9.4817477970  |
| H24  | 10.6546649251 | 3.8431869032  | 10.3394488876 |
| C25  | 10.4641713762 | 3.6367840585  | 8.2077551566  |
| H26  | 11.5143193080 | 3.4281435071  | 8.0282370428  |
| C27  | 9.5639910499  | 3.5923786048  | 7.1368245924  |
| H28  | 9.8641649006  | 3.3226035812  | 6.1258587147  |
| C29  | 8.4361999554  | 0.5997518485  | 6.7379667011  |
| C30  | 9.5646987528  | 0.2473831064  | 6.0494384717  |
| H31  | 9.5758085863  | 0.1805370172  | 4.9653146692  |
| C32  | 10.7140186231 | -0.0709599530 | 6.8093418470  |
| H33  | 11.6235808549 | -0.3448943162 | 6.2795726227  |
| C34  | 10.7017254003 | -0.0750187379 | 8.1901291902  |
| H35  | 11.5969003205 | -0.3510917619 | 8.7439717602  |
| C36  | 9.5195521574  | 0.2303114163  | 8.8938261213  |
| C37  | 8.3790780698  | 0.5703572617  | 8.1385263735  |
| C38  | 7.1439499865  | 0.8131423414  | 8.7843412002  |
| C39  | 7.0131816889  | 0.7152998035  | 10.1784761236 |
| C40  | 5.7250300110  | 0.9040581477  | 10.7103276038 |
| H41  | 5.5721918494  | 0.8300761324  | 11.7856532148 |
| C42  | 4.6628425442  | 1.1627788488  | 9.8665955599  |
| H43  | 3.6575187399  | 1.2983761777  | 10.2529145942 |
| C44  | 4.8800056982  | 1.2512997678  | 8.4855316326  |
| H45  | 4.0751364054  | 1.4516169902  | 7.7817970182  |
| C46  | 8.1891596344  | 0.4056931026  | 10.9363307432 |
| H47  | 8.1039279585  | 0.3358223855  | 12.0188646860 |
| C48  | 9.3831113612  | 0.1770977017  | 10.3210117812 |
| H49  | 10.2606822710 | -0.0789872766 | 10.9121934837 |
| C50  | 6.6485046587  | 4.4345423566  | 11.0666670765 |
| H51  | 6.1800298247  | 4.4993718005  | 12.0473381680 |
| C52  | 7.9985218097  | 4.3024411539  | 10.9615539683 |
| H53  | 8.6257552967  | 4.2747090181  | 11.8500733427 |
| O54  | 7.3335369543  | 1.0441276474  | 4.0437786766  |
| Cl55 | 6.2263392719  | -1.2675615900 | 5.8818439230  |
| O56  | 8.2072331982  | 3.1236422590  | 4.1268606853  |
| C57  | 8.0047077452  | 2.0366069089  | 3.5632305490  |
| C58  | 8.5961911666  | 1.7584343821  | 2.2065436124  |
| H59  | 7.9321456022  | 1.1284233487  | 1.6109311328  |
| H60  | 8.8158911903  | 2.6952914126  | 1.6916338537  |
| H61  | 9.5344344047  | 1.2075365929  | 2.3414813164  |
| Cl62 | 6.2941803301  | 6.1732446110  | 6.1859637364  |
| H63  | 4.7518477519  | 4.2762184039  | 3.8380874546  |

NAO Atom No lang Type(AO) Occupancy Energy

|   |    |     |          |         |          |
|---|----|-----|----------|---------|----------|
| 1 | Pd | 1 s | Cor( 4s) | 1.99469 | -3.42095 |
| 2 | Pd | 1 s | Val( 5s) | 0.31603 | 0.35137  |
| 3 | Pd | 1 s | Ryd( 8s) | 0.00145 | 9.28677  |
| 4 | Pd | 1 s | Ryd( 9s) | 0.00058 | 10.68916 |
| 5 | Pd | 1 s | Ryd( 6s) | 0.00046 | 4.39028  |

|    |    |   |       |          |         |          |
|----|----|---|-------|----------|---------|----------|
| 6  | Pd | 1 | s     | Ryd( 7s) | 0.00002 | 9.03393  |
| 7  | Pd | 1 | s     | Ryd(10s) | 0.00001 | 12.59475 |
| 8  | Pd | 1 | s     | Ryd(11s) | 0.00000 | 16.18686 |
| 9  | Pd | 1 | px    | Cor( 4p) | 1.99633 | -2.18831 |
| 10 | Pd | 1 | px    | Ryd( 6p) | 0.00308 | 0.81654  |
| 11 | Pd | 1 | px    | Ryd( 7p) | 0.00092 | 1.47816  |
| 12 | Pd | 1 | px    | Ryd( 5p) | 0.00035 | 0.72162  |
| 13 | Pd | 1 | px    | Ryd( 8p) | 0.00032 | 2.82344  |
| 14 | Pd | 1 | px    | Ryd( 9p) | 0.00000 | 9.33663  |
| 15 | Pd | 1 | px    | Ryd(10p) | 0.00000 | 11.22706 |
| 16 | Pd | 1 | py    | Cor( 4p) | 1.99716 | -2.19584 |
| 17 | Pd | 1 | py    | Ryd( 7p) | 0.01079 | 1.47499  |
| 18 | Pd | 1 | py    | Ryd( 6p) | 0.00216 | 1.26621  |
| 19 | Pd | 1 | py    | Ryd( 5p) | 0.00024 | 0.79253  |
| 20 | Pd | 1 | py    | Ryd( 8p) | 0.00015 | 2.94832  |
| 21 | Pd | 1 | py    | Ryd( 9p) | 0.00001 | 9.42778  |
| 22 | Pd | 1 | py    | Ryd(10p) | 0.00000 | 11.23553 |
| 23 | Pd | 1 | pz    | Cor( 4p) | 1.99679 | -2.18745 |
| 24 | Pd | 1 | pz    | Ryd( 7p) | 0.00291 | 1.44606  |
| 25 | Pd | 1 | pz    | Ryd( 6p) | 0.00111 | 1.37161  |
| 26 | Pd | 1 | pz    | Ryd( 5p) | 0.00040 | 0.64384  |
| 27 | Pd | 1 | pz    | Ryd( 8p) | 0.00031 | 2.93254  |
| 28 | Pd | 1 | pz    | Ryd( 9p) | 0.00000 | 9.28317  |
| 29 | Pd | 1 | pz    | Ryd(10p) | 0.00000 | 11.22811 |
| 30 | Pd | 1 | dxy   | Val( 4d) | 1.94538 | -0.41389 |
| 31 | Pd | 1 | dxy   | Ryd( 6d) | 0.00250 | 0.96670  |
| 32 | Pd | 1 | dxy   | Ryd( 5d) | 0.00083 | 0.63409  |
| 33 | Pd | 1 | dxy   | Ryd( 7d) | 0.00004 | 2.70896  |
| 34 | Pd | 1 | dxz   | Val( 4d) | 1.54448 | -0.39213 |
| 35 | Pd | 1 | dxz   | Ryd( 6d) | 0.00174 | 1.62621  |
| 36 | Pd | 1 | dxz   | Ryd( 5d) | 0.00091 | 0.90978  |
| 37 | Pd | 1 | dxz   | Ryd( 7d) | 0.00005 | 2.59147  |
| 38 | Pd | 1 | dyz   | Val( 4d) | 1.93458 | -0.41503 |
| 39 | Pd | 1 | dyz   | Ryd( 6d) | 0.00246 | 1.10618  |
| 40 | Pd | 1 | dyz   | Ryd( 5d) | 0.00116 | 0.51560  |
| 41 | Pd | 1 | dyz   | Ryd( 7d) | 0.00004 | 2.63612  |
| 42 | Pd | 1 | dx2y2 | Val( 4d) | 1.69712 | -0.40767 |
| 43 | Pd | 1 | dx2y2 | Ryd( 6d) | 0.00323 | 1.32912  |
| 44 | Pd | 1 | dx2y2 | Ryd( 5d) | 0.00111 | 1.30435  |
| 45 | Pd | 1 | dx2y2 | Ryd( 7d) | 0.00008 | 2.72435  |
| 46 | Pd | 1 | dz2   | Val( 4d) | 1.89079 | -0.41111 |
| 47 | Pd | 1 | dz2   | Ryd( 6d) | 0.00217 | 1.09348  |
| 48 | Pd | 1 | dz2   | Ryd( 5d) | 0.00076 | 0.62129  |
| 49 | Pd | 1 | dz2   | Ryd( 7d) | 0.00004 | 2.55677  |
| 50 | Pd | 1 | f(0)  | Ryd( 4f) | 0.00020 | 1.51349  |
| 51 | Pd | 1 | f(0)  | Ryd( 5f) | 0.00001 | 4.31071  |
| 52 | Pd | 1 | f(c1) | Ryd( 4f) | 0.00037 | 1.63662  |
| 53 | Pd | 1 | f(c1) | Ryd( 5f) | 0.00002 | 4.39950  |
| 54 | Pd | 1 | f(s1) | Ryd( 4f) | 0.00023 | 1.55384  |
| 55 | Pd | 1 | f(s1) | Ryd( 5f) | 0.00001 | 4.34844  |
| 56 | Pd | 1 | f(c2) | Ryd( 4f) | 0.00038 | 1.61389  |
| 57 | Pd | 1 | f(c2) | Ryd( 5f) | 0.00002 | 4.38869  |
| 58 | Pd | 1 | f(s2) | Ryd( 4f) | 0.00028 | 1.53778  |
| 59 | Pd | 1 | f(s2) | Ryd( 5f) | 0.00001 | 4.33372  |
| 60 | Pd | 1 | f(c3) | Ryd( 4f) | 0.00023 | 1.47236  |
| 61 | Pd | 1 | f(c3) | Ryd( 5f) | 0.00001 | 4.27264  |
| 62 | Pd | 1 | f(s3) | Ryd( 4f) | 0.00030 | 1.58936  |
| 63 | Pd | 1 | f(s3) | Ryd( 5f) | 0.00001 | 4.36928  |
| 64 | Pd | 2 | s     | Cor( 4s) | 1.99298 | -3.44187 |
| 65 | Pd | 2 | s     | Val( 5s) | 0.36540 | 0.47572  |
| 66 | Pd | 2 | s     | Ryd( 6s) | 0.00248 | 1.64296  |
| 67 | Pd | 2 | s     | Ryd(11s) | 0.00098 | 20.82702 |

|     |    |   |       |          |         |          |
|-----|----|---|-------|----------|---------|----------|
| 68  | Pd | 2 | s     | Ryd( 7s) | 0.00038 | 2.37314  |
| 69  | Pd | 2 | s     | Ryd( 8s) | 0.00002 | 11.70282 |
| 70  | Pd | 2 | s     | Ryd(10s) | 0.00001 | 16.30064 |
| 71  | Pd | 2 | s     | Ryd( 9s) | 0.00000 | 15.77080 |
| 72  | Pd | 2 | px    | Cor( 4p) | 1.99287 | -2.23373 |
| 73  | Pd | 2 | px    | Ryd( 6p) | 0.00289 | 1.68456  |
| 74  | Pd | 2 | px    | Ryd( 7p) | 0.00145 | 2.27156  |
| 75  | Pd | 2 | px    | Ryd( 8p) | 0.00040 | 2.79530  |
| 76  | Pd | 2 | px    | Ryd( 5p) | 0.00026 | 1.27666  |
| 77  | Pd | 2 | px    | Ryd( 9p) | 0.00001 | 7.96891  |
| 78  | Pd | 2 | px    | Ryd(10p) | 0.00000 | 11.03132 |
| 79  | Pd | 2 | py    | Cor( 4p) | 1.99734 | -2.23545 |
| 80  | Pd | 2 | py    | Ryd( 7p) | 0.01211 | 1.37802  |
| 81  | Pd | 2 | py    | Ryd( 5p) | 0.00413 | 1.04615  |
| 82  | Pd | 2 | py    | Ryd( 8p) | 0.00016 | 3.21542  |
| 83  | Pd | 2 | py    | Ryd( 6p) | 0.00020 | 1.11130  |
| 84  | Pd | 2 | py    | Ryd( 9p) | 0.00001 | 8.58173  |
| 85  | Pd | 2 | py    | Ryd(10p) | 0.00000 | 11.05238 |
| 86  | Pd | 2 | pz    | Cor( 4p) | 1.99742 | -2.23382 |
| 87  | Pd | 2 | pz    | Ryd( 6p) | 0.00343 | 1.67038  |
| 88  | Pd | 2 | pz    | Ryd( 7p) | 0.00130 | 1.80216  |
| 89  | Pd | 2 | pz    | Ryd( 8p) | 0.00062 | 3.08037  |
| 90  | Pd | 2 | pz    | Ryd( 5p) | 0.00033 | 1.03367  |
| 91  | Pd | 2 | pz    | Ryd( 9p) | 0.00001 | 8.09254  |
| 92  | Pd | 2 | pz    | Ryd(10p) | 0.00000 | 11.01982 |
| 93  | Pd | 2 | dxy   | Val( 4d) | 1.91612 | -0.44776 |
| 94  | Pd | 2 | dxy   | Ryd( 6d) | 0.00247 | 0.89521  |
| 95  | Pd | 2 | dxy   | Ryd( 5d) | 0.00154 | 0.69879  |
| 96  | Pd | 2 | dxy   | Ryd( 7d) | 0.00002 | 2.77572  |
| 97  | Pd | 2 | dxz   | Val( 4d) | 1.71629 | -0.44029 |
| 98  | Pd | 2 | dxz   | Ryd( 6d) | 0.00238 | 1.32302  |
| 99  | Pd | 2 | dxz   | Ryd( 5d) | 0.00080 | 0.64856  |
| 100 | Pd | 2 | dxz   | Ryd( 7d) | 0.00004 | 2.65278  |
| 101 | Pd | 2 | dyz   | Val( 4d) | 1.97102 | -0.44778 |
| 102 | Pd | 2 | dyz   | Ryd( 6d) | 0.00328 | 0.88223  |
| 103 | Pd | 2 | dyz   | Ryd( 5d) | 0.00196 | 0.72844  |
| 104 | Pd | 2 | dyz   | Ryd( 7d) | 0.00003 | 2.68907  |
| 105 | Pd | 2 | dx2y2 | Val( 4d) | 1.65753 | -0.44654 |
| 106 | Pd | 2 | dx2y2 | Ryd( 5d) | 0.00346 | 1.33303  |
| 107 | Pd | 2 | dx2y2 | Ryd( 6d) | 0.00102 | 1.38769  |
| 108 | Pd | 2 | dx2y2 | Ryd( 7d) | 0.00010 | 2.79465  |
| 109 | Pd | 2 | dz2   | Val( 4d) | 1.50224 | -0.43111 |
| 110 | Pd | 2 | dz2   | Ryd( 6d) | 0.00202 | 1.60967  |
| 111 | Pd | 2 | dz2   | Ryd( 5d) | 0.00092 | 0.91331  |
| 112 | Pd | 2 | dz2   | Ryd( 7d) | 0.00007 | 2.63228  |
| 113 | Pd | 2 | f(0)  | Ryd( 4f) | 0.00078 | 1.70147  |
| 114 | Pd | 2 | f(0)  | Ryd( 5f) | 0.00003 | 4.43524  |
| 115 | Pd | 2 | f(c1) | Ryd( 4f) | 0.00067 | 1.60403  |
| 116 | Pd | 2 | f(c1) | Ryd( 5f) | 0.00003 | 4.37149  |
| 117 | Pd | 2 | f(s1) | Ryd( 4f) | 0.00045 | 1.45574  |
| 118 | Pd | 2 | f(s1) | Ryd( 5f) | 0.00001 | 4.26437  |
| 119 | Pd | 2 | f(c2) | Ryd( 4f) | 0.00042 | 1.54648  |
| 120 | Pd | 2 | f(c2) | Ryd( 5f) | 0.00002 | 4.33141  |
| 121 | Pd | 2 | f(s2) | Ryd( 4f) | 0.00021 | 1.43538  |
| 122 | Pd | 2 | f(s2) | Ryd( 5f) | 0.00001 | 4.24465  |
| 123 | Pd | 2 | f(c3) | Ryd( 4f) | 0.00046 | 1.50887  |
| 124 | Pd | 2 | f(c3) | Ryd( 5f) | 0.00001 | 4.29920  |
| 125 | Pd | 2 | f(s3) | Ryd( 4f) | 0.00055 | 1.57180  |
| 126 | Pd | 2 | f(s3) | Ryd( 5f) | 0.00002 | 4.36765  |

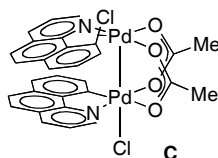

|      |               |               |               |
|------|---------------|---------------|---------------|
| H1   | -3.8784949058 | 0.5537249391  | 0.3334845847  |
| C2   | -2.8046241421 | 0.3876678682  | 0.3615038010  |
| H3   | -2.6368530729 | 0.2539269207  | -1.7751097093 |
| C4   | -2.1155386271 | 0.2204746416  | -0.8217749431 |
| C5   | -0.8098025002 | 0.1146641763  | 1.6542078791  |
| C6   | -0.7345348511 | -0.0313091399 | -0.7974101324 |
| C7   | -2.1652544790 | 0.3207992577  | 1.6127737621  |
| C8   | -0.0982940768 | -0.0686670487 | 0.4569330820  |
| C9   | 0.0621438572  | -0.2779696434 | -1.9619599568 |
| H10  | -2.7337780785 | 0.4006679272  | 2.5340714122  |
| C11  | 1.3858847117  | -0.5684239603 | -1.8742895342 |
| H12  | -0.4251968565 | -0.2443675898 | -2.9338665433 |
| H13  | 1.9695202847  | -0.7694424182 | -2.7691779602 |
| C14  | 2.0433916225  | -0.6412001095 | -0.6054662242 |
| C15  | 3.3894902211  | -0.9761863041 | -0.4128035245 |
| C16  | 1.2799394859  | -0.3763475473 | 0.5417511975  |
| C17  | 3.8960564639  | -1.0571643428 | 0.8655003571  |
| H18  | 4.0189692045  | -1.1862469080 | -1.2740130429 |
| H19  | 4.9282019121  | -1.3332292317 | 1.0455442298  |
| C20  | 3.0647611572  | -0.7883791378 | 1.9548068973  |
| H21  | 3.4209847598  | -0.8590627223 | 2.9767215906  |
| N22  | 1.8011395049  | -0.4367216061 | 1.7907283213  |
| Pd23 | 0.3389111672  | -0.1465925046 | 3.2483562055  |
| Pd24 | 1.3559215414  | 2.2556763780  | 3.4252123151  |
| H25  | 4.8023509496  | 2.3582489876  | -1.6022752393 |
| C26  | 3.8716881295  | 2.6197822875  | -1.1099718580 |
| H27  | 2.6660443574  | 2.4023574511  | -2.8647801738 |
| C28  | 2.6902596555  | 2.6320428334  | -1.8034440650 |
| C29  | 2.7142451361  | 3.3382380224  | 0.8666677011  |
| C30  | 1.4828091202  | 2.9587004944  | -1.1626707480 |
| C31  | 3.8884218555  | 3.0237874528  | 0.2272621683  |
| C32  | 1.4540636373  | 3.2140242350  | 0.2344417043  |
| C33  | 0.2896957000  | 3.0881699675  | -1.9374188695 |
| H34  | 4.8248801569  | 3.1304929290  | 0.7624994983  |
| C35  | -0.8707364825 | 3.4790007739  | -1.3720002676 |
| H36  | 0.3567332873  | 2.9038974084  | -3.0058658826 |
| H37  | -1.7658542022 | 3.6318902909  | -1.9678596106 |
| C38  | -0.9708593948 | 3.6141881734  | 0.0436729621  |
| C39  | -2.1974368596 | 3.8986182265  | 0.6602431880  |
| C40  | 0.1566346810  | 3.3712173528  | 0.8593786159  |
| C41  | -2.2940427443 | 3.8918483568  | 2.0265433360  |
| H42  | -3.0635233890 | 4.0997745753  | 0.0354658687  |
| H43  | -3.2226105990 | 4.1136546324  | 2.5383134265  |
| C44  | -1.1807795934 | 3.4924460854  | 2.7618641437  |

|      |               |               |              |
|------|---------------|---------------|--------------|
| H45  | -1.2262075256 | 3.3438693852  | 3.8377319126 |
| N46  | -0.0094940706 | 3.2184207486  | 2.1992174924 |
| C47  | -1.1631853180 | 1.1732350027  | 5.4084473862 |
| O48  | -0.3479174378 | 2.0906324736  | 5.4804140846 |
| O49  | -1.2084091472 | 0.2427416895  | 4.5231745088 |
| C50  | 2.5414941311  | 0.3222819218  | 5.2637032128 |
| O51  | 1.6822591146  | -0.5189508835 | 4.9431534889 |
| O52  | 2.7422153816  | 1.4328448176  | 4.6784821429 |
| C53  | -2.2685709763 | 1.0448056875  | 6.4311710637 |
| H54  | -2.3825022666 | 1.9743959763  | 6.9895273732 |
| H55  | -1.9985726644 | 0.2430469363  | 7.1242222952 |
| H56  | -3.2084128217 | 0.7558972791  | 5.9571552824 |
| C57  | 3.4296234377  | 0.0304963536  | 6.4385822231 |
| H58  | 4.4174766367  | 0.4729796467  | 6.2994898173 |
| H59  | 3.4997954701  | -1.0441530901 | 6.6091472878 |
| H60  | 2.9794047910  | 0.4910735716  | 7.3233008979 |
| CI61 | 2.9053267667  | 4.1040662649  | 2.4435064624 |
| CI62 | -0.2798248816 | -2.5189868713 | 3.0532474837 |

|     |           |          |         |          |
|-----|-----------|----------|---------|----------|
| 366 | Pd 23 s   | Cor( 4s) | 1.99273 | -3.30409 |
| 367 | Pd 23 s   | Val( 5s) | 0.35943 | 0.57984  |
| 368 | Pd 23 s   | Ryd( 6s) | 0.00204 | 1.20922  |
| 369 | Pd 23 s   | Ryd(11s) | 0.00091 | 20.96658 |
| 370 | Pd 23 s   | Ryd( 7s) | 0.00046 | 2.25597  |
| 371 | Pd 23 s   | Ryd(10s) | 0.00004 | 15.43334 |
| 372 | Pd 23 s   | Ryd( 8s) | 0.00001 | 8.49028  |
| 373 | Pd 23 s   | Ryd( 9s) | 0.00000 | 14.55822 |
| 374 | Pd 23 px  | Cor( 4p) | 1.99655 | -2.09923 |
| 375 | Pd 23 px  | Ryd( 5p) | 0.00420 | 1.30291  |
| 376 | Pd 23 px  | Ryd( 7p) | 0.00121 | 2.05781  |
| 377 | Pd 23 px  | Ryd( 8p) | 0.00053 | 2.39221  |
| 378 | Pd 23 px  | Ryd( 6p) | 0.00025 | 1.93959  |
| 379 | Pd 23 px  | Ryd( 9p) | 0.00001 | 8.36520  |
| 380 | Pd 23 px  | Ryd(10p) | 0.00000 | 11.15919 |
| 381 | Pd 23 py  | Cor( 4p) | 1.99837 | -2.09914 |
| 382 | Pd 23 py  | Ryd( 6p) | 0.01190 | 1.61094  |
| 383 | Pd 23 py  | Ryd( 5p) | 0.00331 | 1.14136  |
| 384 | Pd 23 py  | Ryd( 8p) | 0.00017 | 2.43844  |
| 385 | Pd 23 py  | Ryd( 7p) | 0.00023 | 1.80965  |
| 386 | Pd 23 py  | Ryd( 9p) | 0.00001 | 9.13640  |
| 387 | Pd 23 py  | Ryd(10p) | 0.00000 | 11.21919 |
| 388 | Pd 23 pz  | Cor( 4p) | 1.99556 | -2.10134 |
| 389 | Pd 23 pz  | Ryd( 6p) | 0.00345 | 1.73431  |
| 390 | Pd 23 pz  | Ryd( 8p) | 0.00118 | 2.51645  |
| 391 | Pd 23 pz  | Ryd( 7p) | 0.00051 | 2.37750  |
| 392 | Pd 23 pz  | Ryd( 5p) | 0.00049 | 1.66345  |
| 393 | Pd 23 pz  | Ryd( 9p) | 0.00001 | 8.45412  |
| 394 | Pd 23 pz  | Ryd(10p) | 0.00000 | 11.16076 |
| 395 | Pd 23 dxy | Val( 4d) | 1.90382 | -0.31207 |

---

|     |       |       |          |         |          |
|-----|-------|-------|----------|---------|----------|
| 396 | Pd 23 | dxy   | Ryd( 5d) | 0.00381 | 1.14204  |
| 397 | Pd 23 | dxy   | Ryd( 6d) | 0.00100 | 1.55375  |
| 398 | Pd 23 | dxy   | Ryd( 7d) | 0.00004 | 2.94572  |
| 399 | Pd 23 | dxz   | Val( 4d) | 1.31581 | -0.29402 |
| 400 | Pd 23 | dxz   | Ryd( 6d) | 0.00118 | 1.91821  |
| 401 | Pd 23 | dxz   | Ryd( 5d) | 0.00103 | 1.03229  |
| 402 | Pd 23 | dxz   | Ryd( 7d) | 0.00005 | 2.68695  |
| 403 | Pd 23 | dyz   | Val( 4d) | 1.92096 | -0.31252 |
| 404 | Pd 23 | dyz   | Ryd( 6d) | 0.00340 | 0.99425  |
| 405 | Pd 23 | dyz   | Ryd( 5d) | 0.00135 | 0.88192  |
| 406 | Pd 23 | dyz   | Ryd( 7d) | 0.00003 | 2.75795  |
| 407 | Pd 23 | dx2y2 | Val( 4d) | 1.76128 | -0.30870 |
| 408 | Pd 23 | dx2y2 | Ryd( 6d) | 0.00386 | 1.38039  |
| 409 | Pd 23 | dx2y2 | Ryd( 5d) | 0.00102 | 1.35036  |
| 410 | Pd 23 | dx2y2 | Ryd( 7d) | 0.00007 | 2.81076  |
| 411 | Pd 23 | dz2   | Val( 4d) | 1.85087 | -0.31586 |
| 412 | Pd 23 | dz2   | Ryd( 6d) | 0.00293 | 1.24464  |
| 413 | Pd 23 | dz2   | Ryd( 5d) | 0.00062 | 0.91656  |
| 414 | Pd 23 | dz2   | Ryd( 7d) | 0.00006 | 2.68011  |
| 415 | Pd 23 | f(0)  | Ryd( 4f) | 0.00038 | 1.65843  |
| 416 | Pd 23 | f(0)  | Ryd( 5f) | 0.00001 | 4.45037  |
| 417 | Pd 23 | f(c1) | Ryd( 4f) | 0.00090 | 1.87939  |
| 418 | Pd 23 | f(c1) | Ryd( 5f) | 0.00004 | 4.61748  |
| 419 | Pd 23 | f(s1) | Ryd( 4f) | 0.00036 | 1.57096  |
| 420 | Pd 23 | f(s1) | Ryd( 5f) | 0.00001 | 4.37756  |
| 421 | Pd 23 | f(c2) | Ryd( 4f) | 0.00077 | 1.81136  |
| 422 | Pd 23 | f(c2) | Ryd( 5f) | 0.00003 | 4.55968  |
| 423 | Pd 23 | f(s2) | Ryd( 4f) | 0.00046 | 1.62489  |
| 424 | Pd 23 | f(s2) | Ryd( 5f) | 0.00001 | 4.41074  |
| 425 | Pd 23 | f(c3) | Ryd( 4f) | 0.00040 | 1.65971  |
| 426 | Pd 23 | f(c3) | Ryd( 5f) | 0.00001 | 4.46403  |
| 427 | Pd 23 | f(s3) | Ryd( 4f) | 0.00040 | 1.58705  |
| 428 | Pd 23 | f(s3) | Ryd( 5f) | 0.00001 | 4.38366  |
| 429 | Pd 24 | s     | Cor( 4s) | 1.99701 | -3.29378 |
| 430 | Pd 24 | s     | Val( 5s) | 0.36065 | 0.31316  |
| 431 | Pd 24 | s     | Ryd( 8s) | 0.00130 | 6.75115  |
| 432 | Pd 24 | s     | Ryd( 9s) | 0.00037 | 7.01646  |
| 433 | Pd 24 | s     | Ryd( 7s) | 0.00018 | 4.11392  |
| 434 | Pd 24 | s     | Ryd( 6s) | 0.00001 | 2.95839  |
| 435 | Pd 24 | s     | Ryd(10s) | 0.00000 | 10.24513 |
| 436 | Pd 24 | s     | Ryd(11s) | 0.00000 | 13.22437 |
| 437 | Pd 24 | px    | Cor( 4p) | 1.99858 | -2.05113 |
| 438 | Pd 24 | px    | Ryd( 7p) | 0.00357 | 1.55006  |
| 439 | Pd 24 | px    | Ryd( 6p) | 0.00125 | 1.40632  |
| 440 | Pd 24 | px    | Ryd( 5p) | 0.00037 | 1.29525  |
| 441 | Pd 24 | px    | Ryd( 8p) | 0.00035 | 2.50991  |
| 442 | Pd 24 | px    | Ryd( 9p) | 0.00000 | 9.23979  |
| 443 | Pd 24 | px    | Ryd(10p) | 0.00000 | 11.44908 |
| 444 | Pd 24 | py    | Cor( 4p) | 1.99736 | -2.05333 |

---

|     |       |       |          |         |          |
|-----|-------|-------|----------|---------|----------|
| 445 | Pd 24 | py    | Ryd( 6p) | 0.00790 | 1.51166  |
| 446 | Pd 24 | py    | Ryd( 7p) | 0.00098 | 1.58950  |
| 447 | Pd 24 | py    | Ryd( 5p) | 0.00020 | 1.13301  |
| 448 | Pd 24 | py    | Ryd( 8p) | 0.00020 | 2.49495  |
| 449 | Pd 24 | py    | Ryd( 9p) | 0.00001 | 9.27469  |
| 450 | Pd 24 | py    | Ryd(10p) | 0.00000 | 11.44929 |
| 451 | Pd 24 | pz    | Cor( 4p) | 1.99911 | -2.04436 |
| 452 | Pd 24 | pz    | Ryd( 5p) | 0.00462 | 1.13068  |
| 453 | Pd 24 | pz    | Ryd( 7p) | 0.00111 | 1.19387  |
| 454 | Pd 24 | pz    | Ryd( 6p) | 0.00032 | 1.18647  |
| 455 | Pd 24 | pz    | Ryd( 8p) | 0.00020 | 2.48226  |
| 456 | Pd 24 | pz    | Ryd( 9p) | 0.00000 | 9.26771  |
| 457 | Pd 24 | pz    | Ryd(10p) | 0.00000 | 11.45986 |
| 458 | Pd 24 | dxy   | Val( 4d) | 1.63006 | -0.26386 |
| 459 | Pd 24 | dxy   | Ryd( 6d) | 0.00172 | 1.46368  |
| 460 | Pd 24 | dxy   | Ryd( 5d) | 0.00075 | 0.97602  |
| 461 | Pd 24 | dxy   | Ryd( 7d) | 0.00004 | 3.08698  |
| 462 | Pd 24 | dxz   | Val( 4d) | 1.69894 | -0.25531 |
| 463 | Pd 24 | dxz   | Ryd( 6d) | 0.00196 | 1.72049  |
| 464 | Pd 24 | dxz   | Ryd( 5d) | 0.00067 | 0.85813  |
| 465 | Pd 24 | dxz   | Ryd( 7d) | 0.00004 | 2.79550  |
| 466 | Pd 24 | dyz   | Val( 4d) | 1.86040 | -0.26756 |
| 467 | Pd 24 | dyz   | Ryd( 6d) | 0.00177 | 1.50875  |
| 468 | Pd 24 | dyz   | Ryd( 5d) | 0.00062 | 0.66566  |
| 469 | Pd 24 | dyz   | Ryd( 7d) | 0.00005 | 2.73238  |
| 470 | Pd 24 | dx2y2 | Val( 4d) | 1.92728 | -0.27442 |
| 471 | Pd 24 | dx2y2 | Ryd( 6d) | 0.00162 | 1.16237  |
| 472 | Pd 24 | dx2y2 | Ryd( 5d) | 0.00059 | 0.76169  |
| 473 | Pd 24 | dx2y2 | Ryd( 7d) | 0.00006 | 2.60085  |
| 474 | Pd 24 | dz2   | Val( 4d) | 1.95515 | -0.26872 |
| 475 | Pd 24 | dz2   | Ryd( 6d) | 0.00134 | 1.07516  |
| 476 | Pd 24 | dz2   | Ryd( 5d) | 0.00060 | 0.79050  |
| 477 | Pd 24 | dz2   | Ryd( 7d) | 0.00003 | 2.72145  |
| 478 | Pd 24 | f(0)  | Ryd( 4f) | 0.00023 | 1.66535  |
| 479 | Pd 24 | f(0)  | Ryd( 5f) | 0.00001 | 4.44985  |
| 480 | Pd 24 | f(c1) | Ryd( 4f) | 0.00027 | 1.69300  |
| 481 | Pd 24 | f(c1) | Ryd( 5f) | 0.00001 | 4.46132  |
| 482 | Pd 24 | f(s1) | Ryd( 4f) | 0.00016 | 1.68619  |
| 483 | Pd 24 | f(s1) | Ryd( 5f) | 0.00001 | 4.45310  |
| 484 | Pd 24 | f(c2) | Ryd( 4f) | 0.00021 | 1.65640  |
| 485 | Pd 24 | f(c2) | Ryd( 5f) | 0.00001 | 4.44368  |
| 486 | Pd 24 | f(s2) | Ryd( 4f) | 0.00059 | 1.77429  |
| 487 | Pd 24 | f(s2) | Ryd( 5f) | 0.00004 | 4.53003  |
| 488 | Pd 24 | f(c3) | Ryd( 4f) | 0.00022 | 1.70967  |
| 489 | Pd 24 | f(c3) | Ryd( 5f) | 0.00001 | 4.47342  |
| 490 | Pd 24 | f(s3) | Ryd( 4f) | 0.00024 | 1.68496  |
| 491 | Pd 24 | f(s3) | Ryd( 5f) | 0.00002 | 4.45911  |



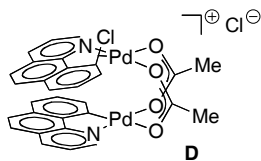

|      |           |           |           |
|------|-----------|-----------|-----------|
| C1   | -2.196000 | 0.235000  | -0.478000 |
| C2   | -1.428000 | -0.244000 | -1.523000 |
| C3   | -0.383000 | -0.017000 | 1.087000  |
| C4   | -0.093000 | -0.632000 | -1.292000 |
| C5   | -1.687000 | 0.353000  | 0.834000  |
| C6   | 0.406000  | -0.500000 | 0.020000  |
| C7   | 0.785000  | -1.155000 | -2.299000 |
| C8   | 2.073000  | -1.499000 | -2.019000 |
| C9   | 2.605000  | -1.355000 | -0.696000 |
| C10  | 3.922000  | -1.662000 | -0.312000 |
| C11  | 1.746000  | -0.864000 | 0.302000  |
| C12  | 4.313000  | -1.485000 | 1.001000  |
| C13  | 3.388000  | -1.011000 | 1.939000  |
| C14  | -1.186000 | 1.200000  | 4.888000  |
| C15  | 2.488000  | 0.491000  | 5.287000  |
| C16  | -2.332000 | 1.009000  | 5.840000  |
| C17  | 2.790000  | 2.063000  | -1.224000 |
| C18  | 1.520000  | 2.334000  | -1.669000 |
| C19  | 2.192000  | 2.947000  | 0.924000  |
| C20  | 0.553000  | 2.906000  | -0.819000 |
| C21  | 3.138000  | 2.398000  | 0.089000  |
| C22  | 0.846000  | 3.177000  | 0.551000  |
| C23  | -0.715000 | 3.254000  | -1.377000 |
| C24  | -1.640000 | 3.909000  | -0.641000 |
| C25  | -1.422000 | 4.132000  | 0.749000  |
| C26  | -2.416000 | 4.757000  | 1.522000  |
| C27  | -0.230000 | 3.688000  | 1.380000  |
| C28  | -2.251000 | 4.905000  | 2.877000  |
| C29  | -1.121000 | 4.335000  | 3.458000  |
| C30  | 3.406000  | -0.006000 | 6.368000  |
| N31  | 2.142000  | -0.708000 | 1.594000  |
| N32  | -0.168000 | 3.733000  | 2.745000  |
| O33  | 1.820000  | -0.327000 | 4.626000  |
| O34  | 2.477000  | 1.767000  | 5.151000  |
| O35  | -1.131000 | 0.447000  | 3.889000  |
| O36  | -0.358000 | 2.122000  | 5.199000  |
| Cl37 | 2.853000  | 3.481000  | 2.484000  |
| Pd38 | 0.603000  | -0.045000 | 2.814000  |
| Pd39 | 1.154000  | 2.656000  | 3.921000  |
| H40  | -3.229000 | 0.520000  | -0.666000 |
| H41  | -1.851000 | -0.343000 | -2.521000 |
| H42  | -2.326000 | 0.712000  | 1.639000  |
| H43  | 0.397000  | -1.280000 | -3.309000 |
| H44  | 2.721000  | -1.898000 | -2.797000 |

|     |           |           |           |
|-----|-----------|-----------|-----------|
| H45 | 4.624000  | -2.045000 | -1.051000 |
| H46 | 5.322000  | -1.722000 | 1.324000  |
| H47 | 3.639000  | -0.888000 | 2.991000  |
| H48 | 3.531000  | 1.620000  | -1.884000 |
| H49 | 1.238000  | 2.121000  | -2.698000 |
| H50 | 4.151000  | 2.250000  | 0.451000  |
| H51 | -0.891000 | 3.023000  | -2.425000 |
| H52 | -2.581000 | 4.239000  | -1.077000 |
| H53 | -3.316000 | 5.112000  | 1.025000  |
| H54 | -2.993000 | 5.393000  | 3.500000  |
| H55 | -0.995000 | 4.316000  | 4.537000  |
| H56 | -2.514000 | 1.905000  | 6.435000  |
| H57 | -2.078000 | 0.186000  | 6.518000  |
| H58 | -3.227000 | 0.714000  | 5.288000  |
| H59 | 4.290000  | 0.630000  | 6.452000  |
| H60 | 3.688000  | -1.044000 | 6.176000  |
| H61 | 2.876000  | 0.035000  | 7.325000  |

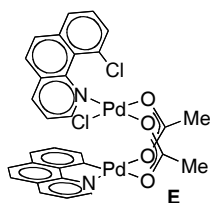

|      |               |               |               |
|------|---------------|---------------|---------------|
| H1   | -4.3357183022 | -0.0705173485 | 1.8399906777  |
| C2   | -3.2858550271 | -0.2609845083 | 1.6218226364  |
| H3   | -3.6948719075 | -0.9739191205 | -0.3682011944 |
| C4   | -2.9349380215 | -0.7674205891 | 0.3840253396  |
| C5   | -0.9846059463 | -0.2213139322 | 2.3641572279  |
| C6   | -1.5808985255 | -1.0323829637 | 0.0960438908  |
| C7   | -2.3228078749 | 0.0152767763  | 2.6160453514  |
| C8   | -0.6321278286 | -0.7546124620 | 1.1007096039  |
| C9   | -1.1095010615 | -1.5577168969 | -1.1528505821 |
| H10  | -2.6369592947 | 0.4112024224  | 3.5811289549  |
| C11  | 0.2143385888  | -1.7785418831 | -1.3843378601 |
| H12  | -1.8421125176 | -1.7787667766 | -1.9279420535 |
| H13  | 0.5505968678  | -2.1737800165 | -2.3413106978 |
| C14  | 1.1971309173  | -1.4964406220 | -0.3811003633 |
| C15  | 2.5848319200  | -1.6712898988 | -0.5283211314 |
| C16  | 0.7433318562  | -0.9960045475 | 0.8495849822  |
| C17  | 3.4301184200  | -1.3490038604 | 0.5127176436  |
| H18  | 2.9810666547  | -2.0546412978 | -1.4676477694 |
| H19  | 4.5057864608  | -1.4620548594 | 0.4201671754  |
| C20  | 2.8964422117  | -0.8586339008 | 1.7122888112  |
| H21  | 3.5157757308  | -0.5804090591 | 2.5618874990  |
| N22  | 1.5903669592  | -0.7035773135 | 1.8709178892  |
| Pd23 | 0.6206318601  | 0.1024592091  | 3.5041210374  |
| Pd24 | 1.4925558215  | 2.9618796026  | 3.4329753158  |
| H25  | 5.1222570991  | 7.7165725132  | 1.5780766322  |

|      |               |               |               |          |
|------|---------------|---------------|---------------|----------|
| C26  | 4.2239891266  | 7.1215613006  | 1.4348018448  |          |
| H27  | 4.4369564252  | 6.9812551703  | -0.6971181230 |          |
| C28  | 3.8543451976  | 6.7023907721  | 0.1788677932  |          |
| C29  | 2.2665080290  | 6.0663699792  | 2.3644993382  |          |
| C30  | 2.7022529642  | 5.9187798584  | -0.0042671933 |          |
| C31  | 3.3993974161  | 6.8377427234  | 2.5268418452  |          |
| C32  | 1.9333842968  | 5.4880708875  | 1.1141112435  |          |
| C33  | 2.2751403057  | 5.6118762877  | -1.3344280034 |          |
| H34  | 3.6205012125  | 7.2426107221  | 3.5099965965  |          |
| C35  | 1.1287177974  | 4.9335093820  | -1.5636021528 |          |
| H36  | 2.8771996560  | 5.9874022551  | -2.1594598452 |          |
| H37  | 0.7649265190  | 4.7552129216  | -2.5733938807 |          |
| C38  | 0.4101747546  | 4.3587336096  | -0.4716079692 |          |
| C39  | -0.7085161689 | 3.5403798689  | -0.7003333718 |          |
| C40  | 0.8741116674  | 4.5331115553  | 0.8570934282  |          |
| C41  | -1.3183569520 | 2.8949387609  | 0.3485120253  |          |
| H42  | -1.0660888881 | 3.4181513413  | -1.7217580390 |          |
| H43  | -2.1862517120 | 2.2529202715  | 0.2198883681  |          |
| C44  | -0.7175202991 | 2.9931668029  | 1.6031005634  |          |
| H45  | -1.0854408487 | 2.4061502857  | 2.4389171928  |          |
| N46  | 0.3589253168  | 3.7390917559  | 1.8386843009  |          |
| C47  | -0.6925599059 | 2.1431239662  | 5.2953463230  |          |
| O48  | -0.1486889002 | 3.1340639213  | 4.7285991104  |          |
| O49  | -0.5301054202 | 0.9154935123  | 5.0495510200  |          |
| C50  | 2.9860838197  | 1.1439846565  | 5.1700541536  |          |
| O51  | 2.4790034587  | 0.1336198477  | 4.6327273326  |          |
| O52  | 2.6430470740  | 2.3562655383  | 4.9986569901  |          |
| C53  | -1.6536843199 | 2.4691416034  | 6.4102539380  |          |
| H54  | -2.0185669733 | 3.4939187174  | 6.3180991726  |          |
| H55  | -1.1249714786 | 2.3738987821  | 7.3648430799  |          |
| H56  | -2.4835638207 | 1.7577941590  | 6.4166224029  |          |
| C57  | 4.1518929443  | 0.9502719701  | 6.1028850367  |          |
| H58  | 5.0719443605  | 1.1362382541  | 5.5371892682  |          |
| H59  | 4.1712627469  | -0.0697173959 | 6.4913248509  |          |
| H60  | 4.1148329444  | 1.6771350718  | 6.9177072903  |          |
| CI61 | 1.2104038074  | 5.9618650164  | 3.7523236527  |          |
| CI62 | 3.3151206457  | 2.6263637302  | 2.0012083368  |          |
| 370  | Pd 23 s       | Cor( 4s)      | 1.99463       | -3.27646 |
| 371  | Pd 23 s       | Val( 5s)      | 0.37514       | 0.46249  |
| 372  | Pd 23 s       | Ryd(11s)      | 0.00156       | 18.74366 |
| 373  | Pd 23 s       | Ryd( 6s)      | 0.00059       | 1.43825  |
| 374  | Pd 23 s       | Ryd( 7s)      | 0.00037       | 1.57142  |
| 375  | Pd 23 s       | Ryd( 8s)      | 0.00003       | 5.53042  |
| 376  | Pd 23 s       | Ryd( 9s)      | 0.00000       | 7.42842  |
| 377  | Pd 23 s       | Ryd(10s)      | 0.00000       | 12.99567 |
| 378  | Pd 23 px      | Cor( 4p)      | 1.99523       | -2.06376 |
| 379  | Pd 23 px      | Ryd( 5p)      | 0.00157       | 0.95089  |
| 380  | Pd 23 px      | Ryd( 7p)      | 0.00026       | 2.50461  |

---

|     |       |       |          |         |          |
|-----|-------|-------|----------|---------|----------|
| 381 | Pd 23 | px    | Ryd( 8p) | 0.00034 | 3.34009  |
| 382 | Pd 23 | px    | Ryd( 6p) | 0.00021 | 1.04544  |
| 383 | Pd 23 | px    | Ryd( 9p) | 0.00001 | 8.30494  |
| 384 | Pd 23 | px    | Ryd(10p) | 0.00000 | 11.35779 |
| 385 | Pd 23 | py    | Cor( 4p) | 1.99806 | -2.05150 |
| 386 | Pd 23 | py    | Ryd( 6p) | 0.00302 | 1.30501  |
| 387 | Pd 23 | py    | Ryd( 7p) | 0.00049 | 1.38203  |
| 388 | Pd 23 | py    | Ryd( 8p) | 0.00022 | 2.85378  |
| 389 | Pd 23 | py    | Ryd( 5p) | 0.00027 | 0.86701  |
| 390 | Pd 23 | py    | Ryd( 9p) | 0.00000 | 9.23833  |
| 391 | Pd 23 | py    | Ryd(10p) | 0.00000 | 11.43951 |
| 392 | Pd 23 | pz    | Cor( 4p) | 1.99723 | -2.06101 |
| 393 | Pd 23 | pz    | Ryd( 6p) | 0.00161 | 0.93344  |
| 394 | Pd 23 | pz    | Ryd( 7p) | 0.00037 | 1.88576  |
| 395 | Pd 23 | pz    | Ryd( 8p) | 0.00043 | 3.14906  |
| 396 | Pd 23 | pz    | Ryd( 5p) | 0.00026 | 0.92203  |
| 397 | Pd 23 | pz    | Ryd( 9p) | 0.00001 | 8.65166  |
| 398 | Pd 23 | pz    | Ryd(10p) | 0.00000 | 11.39011 |
| 399 | Pd 23 | dxy   | Val( 4d) | 1.88189 | -0.27334 |
| 400 | Pd 23 | dxy   | Ryd( 6d) | 0.00231 | 1.10743  |
| 401 | Pd 23 | dxy   | Ryd( 5d) | 0.00057 | 0.96863  |
| 402 | Pd 23 | dxy   | Ryd( 7d) | 0.00002 | 2.87313  |
| 403 | Pd 23 | dxz   | Val( 4d) | 1.37187 | -0.25974 |
| 404 | Pd 23 | dxz   | Ryd( 6d) | 0.00125 | 1.76261  |
| 405 | Pd 23 | dxz   | Ryd( 5d) | 0.00054 | 0.90104  |
| 406 | Pd 23 | dxz   | Ryd( 7d) | 0.00005 | 2.60303  |
| 407 | Pd 23 | dyz   | Val( 4d) | 1.90444 | -0.27418 |
| 408 | Pd 23 | dyz   | Ryd( 6d) | 0.00197 | 1.25717  |
| 409 | Pd 23 | dyz   | Ryd( 5d) | 0.00051 | 0.59061  |
| 410 | Pd 23 | dyz   | Ryd( 7d) | 0.00004 | 2.81950  |
| 411 | Pd 23 | dx2y2 | Val( 4d) | 1.87899 | -0.27474 |
| 412 | Pd 23 | dx2y2 | Ryd( 6d) | 0.00284 | 1.46873  |
| 413 | Pd 23 | dx2y2 | Ryd( 5d) | 0.00050 | 0.82625  |
| 414 | Pd 23 | dx2y2 | Ryd( 7d) | 0.00005 | 2.71731  |
| 415 | Pd 23 | dz2   | Val( 4d) | 1.90885 | -0.27761 |
| 416 | Pd 23 | dz2   | Ryd( 6d) | 0.00190 | 1.12340  |
| 417 | Pd 23 | dz2   | Ryd( 5d) | 0.00041 | 0.72291  |
| 418 | Pd 23 | dz2   | Ryd( 7d) | 0.00004 | 2.69493  |
| 419 | Pd 23 | f(0)  | Ryd( 4f) | 0.00026 | 1.65658  |
| 420 | Pd 23 | f(0)  | Ryd( 5f) | 0.00002 | 4.40386  |
| 421 | Pd 23 | f(c1) | Ryd( 4f) | 0.00049 | 1.74350  |
| 422 | Pd 23 | f(c1) | Ryd( 5f) | 0.00002 | 4.50108  |
| 423 | Pd 23 | f(s1) | Ryd( 4f) | 0.00024 | 1.72473  |
| 424 | Pd 23 | f(s1) | Ryd( 5f) | 0.00001 | 4.48078  |
| 425 | Pd 23 | f(c2) | Ryd( 4f) | 0.00052 | 1.79183  |
| 426 | Pd 23 | f(c2) | Ryd( 5f) | 0.00003 | 4.54482  |
| 427 | Pd 23 | f(s2) | Ryd( 4f) | 0.00048 | 1.72457  |
| 428 | Pd 23 | f(s2) | Ryd( 5f) | 0.00002 | 4.48007  |
| 429 | Pd 23 | f(c3) | Ryd( 4f) | 0.00023 | 1.70805  |

---

|     |       |       |          |         |          |
|-----|-------|-------|----------|---------|----------|
| 430 | Pd 23 | f(c3) | Ryd( 5f) | 0.00001 | 4.46648  |
| 431 | Pd 23 | f(s3) | Ryd( 4f) | 0.00017 | 1.63821  |
| 432 | Pd 23 | f(s3) | Ryd( 5f) | 0.00001 | 4.38899  |
| 433 | Pd 24 | s     | Cor( 4s) | 1.99828 | -3.31114 |
| 434 | Pd 24 | s     | Val( 5s) | 0.35352 | 0.35694  |
| 435 | Pd 24 | s     | Ryd( 7s) | 0.00217 | 4.09255  |
| 436 | Pd 24 | s     | Ryd( 9s) | 0.00073 | 8.46469  |
| 437 | Pd 24 | s     | Ryd( 8s) | 0.00036 | 4.82179  |
| 438 | Pd 24 | s     | Ryd( 6s) | 0.00001 | 3.16037  |
| 439 | Pd 24 | s     | Ryd(10s) | 0.00000 | 9.60336  |
| 440 | Pd 24 | s     | Ryd(11s) | 0.00000 | 12.25043 |
| 441 | Pd 24 | px    | Cor( 4p) | 1.99894 | -2.07641 |
| 442 | Pd 24 | px    | Ryd( 6p) | 0.00145 | 1.86334  |
| 443 | Pd 24 | px    | Ryd( 5p) | 0.00292 | 1.19282  |
| 444 | Pd 24 | px    | Ryd( 7p) | 0.00029 | 1.95474  |
| 445 | Pd 24 | px    | Ryd( 8p) | 0.00030 | 2.08245  |
| 446 | Pd 24 | px    | Ryd( 9p) | 0.00000 | 9.34185  |
| 447 | Pd 24 | px    | Ryd(10p) | 0.00000 | 11.38699 |
| 448 | Pd 24 | py    | Cor( 4p) | 1.99920 | -2.05589 |
| 449 | Pd 24 | py    | Ryd( 6p) | 0.00490 | 1.31846  |
| 450 | Pd 24 | py    | Ryd( 5p) | 0.00103 | 1.03514  |
| 451 | Pd 24 | py    | Ryd( 8p) | 0.00039 | 2.45236  |
| 452 | Pd 24 | py    | Ryd( 7p) | 0.00007 | 2.26119  |
| 453 | Pd 24 | py    | Ryd( 9p) | 0.00000 | 9.35216  |
| 454 | Pd 24 | py    | Ryd(10p) | 0.00000 | 11.39068 |
| 455 | Pd 24 | pz    | Cor( 4p) | 1.99855 | -2.07644 |
| 456 | Pd 24 | pz    | Ryd( 5p) | 0.00165 | 1.02837  |
| 457 | Pd 24 | pz    | Ryd( 6p) | 0.00186 | 1.07831  |
| 458 | Pd 24 | pz    | Ryd( 7p) | 0.00034 | 1.85622  |
| 459 | Pd 24 | pz    | Ryd( 8p) | 0.00035 | 2.15081  |
| 460 | Pd 24 | pz    | Ryd( 9p) | 0.00000 | 9.30263  |
| 461 | Pd 24 | pz    | Ryd(10p) | 0.00000 | 11.38093 |
| 462 | Pd 24 | dxy   | Val( 4d) | 1.94880 | -0.28147 |
| 463 | Pd 24 | dxy   | Ryd( 6d) | 0.00224 | 1.16196  |
| 464 | Pd 24 | dxy   | Ryd( 5d) | 0.00091 | 0.95402  |
| 465 | Pd 24 | dxy   | Ryd( 7d) | 0.00005 | 2.78880  |
| 466 | Pd 24 | dxz   | Val( 4d) | 1.19995 | -0.26059 |
| 467 | Pd 24 | dxz   | Ryd( 6d) | 0.00245 | 1.79991  |
| 468 | Pd 24 | dxz   | Ryd( 5d) | 0.00085 | 0.92714  |
| 469 | Pd 24 | dxz   | Ryd( 7d) | 0.00006 | 2.65015  |
| 470 | Pd 24 | dyz   | Val( 4d) | 1.85709 | -0.27750 |
| 471 | Pd 24 | dyz   | Ryd( 6d) | 0.00165 | 1.22091  |
| 472 | Pd 24 | dyz   | Ryd( 5d) | 0.00098 | 0.76673  |
| 473 | Pd 24 | dyz   | Ryd( 7d) | 0.00004 | 2.80826  |
| 474 | Pd 24 | dx2y2 | Val( 4d) | 1.92668 | -0.28225 |
| 475 | Pd 24 | dx2y2 | Ryd( 6d) | 0.00211 | 1.21881  |
| 476 | Pd 24 | dx2y2 | Ryd( 5d) | 0.00118 | 1.17015  |
| 477 | Pd 24 | dx2y2 | Ryd( 7d) | 0.00006 | 2.87633  |
| 478 | Pd 24 | dz2   | Val( 4d) | 1.92816 | -0.28434 |

|     |       |       |          |         |         |
|-----|-------|-------|----------|---------|---------|
| 479 | Pd 24 | dz2   | Ryd( 6d) | 0.00213 | 1.15229 |
| 480 | Pd 24 | dz2   | Ryd( 5d) | 0.00080 | 0.94709 |
| 481 | Pd 24 | dz2   | Ryd( 7d) | 0.00006 | 2.79110 |
| 482 | Pd 24 | f(0)  | Ryd( 4f) | 0.00032 | 1.56624 |
| 483 | Pd 24 | f(0)  | Ryd( 5f) | 0.00001 | 4.37407 |
| 484 | Pd 24 | f(c1) | Ryd( 4f) | 0.00078 | 1.72749 |
| 485 | Pd 24 | f(c1) | Ryd( 5f) | 0.00004 | 4.48978 |
| 486 | Pd 24 | f(s1) | Ryd( 4f) | 0.00028 | 1.61815 |
| 487 | Pd 24 | f(s1) | Ryd( 5f) | 0.00002 | 4.42114 |
| 488 | Pd 24 | f(c2) | Ryd( 4f) | 0.00062 | 1.75232 |
| 489 | Pd 24 | f(c2) | Ryd( 5f) | 0.00004 | 4.51232 |
| 490 | Pd 24 | f(s2) | Ryd( 4f) | 0.00056 | 1.67998 |
| 491 | Pd 24 | f(s2) | Ryd( 5f) | 0.00003 | 4.45582 |
| 492 | Pd 24 | f(c3) | Ryd( 4f) | 0.00025 | 1.60512 |
| 493 | Pd 24 | f(c3) | Ryd( 5f) | 0.00001 | 4.40952 |
| 494 | Pd 24 | f(s3) | Ryd( 4f) | 0.00023 | 1.60986 |
| 495 | Pd 24 | f(s3) | Ryd( 5f) | 0.00001 | 4.41078 |

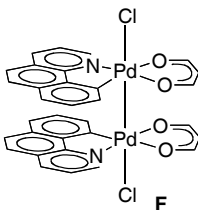

|     |               |               |               |
|-----|---------------|---------------|---------------|
| H1  | -3.8339841476 | 0.4979884017  | -0.0048627135 |
| C2  | -2.7726140542 | 0.2799170290  | 0.0851854563  |
| H3  | -2.4664221535 | 0.2447126845  | -2.0395168361 |
| C4  | -2.0141255441 | 0.1380534092  | -1.0569755284 |
| C5  | -0.8713363372 | -0.1166980065 | 1.5069575802  |
| C6  | -0.6430801292 | -0.1520285103 | -0.9536706054 |
| C7  | -2.2125338477 | 0.1559189638  | 1.3701795369  |
| C8  | -0.1007890123 | -0.2803790772 | 0.3370835005  |
| C9  | 0.2365749901  | -0.3185350543 | -2.0723145824 |
| H10 | -2.8332980442 | 0.2823792067  | 2.2534296317  |
| C11 | 1.5545208348  | -0.6029649765 | -1.9111628986 |
| H12 | -0.1779623089 | -0.2101655859 | -3.0717163189 |
| H13 | 2.2043857756  | -0.7230640031 | -2.7737398652 |
| C14 | 2.1240908370  | -0.7513086078 | -0.6069179915 |
| C15 | 3.4676185417  | -1.0437519031 | -0.3338541092 |
| C16 | 1.2739410171  | -0.5827988151 | 0.4947425166  |
| C17 | 3.8956496024  | -1.1467608353 | 0.9708005167  |
| H18 | 4.1637333491  | -1.1797813083 | -1.1575639642 |
| H19 | 4.9299044859  | -1.3664408893 | 1.2074079426  |
| C20 | 2.9831892880  | -0.9589535647 | 2.0125069393  |
| H21 | 3.2697729770  | -1.0136892454 | 3.0589943436  |

---

|      |               |               |               |
|------|---------------|---------------|---------------|
| N22  | 1.7109330795  | -0.6952687302 | 1.7734594667  |
| Pd23 | 0.2170788385  | -0.3413896371 | 3.1624366866  |
| Pd24 | 1.4742805004  | 2.5984556411  | 3.2952361999  |
| H25  | 4.8567917880  | 2.2876443245  | -0.6542327910 |
| C26  | 3.8338265077  | 2.4769504802  | -0.3383343263 |
| H27  | 3.1414686021  | 2.8229916011  | -2.3408042721 |
| C28  | 2.8798640525  | 2.7773189383  | -1.2868649552 |
| C29  | 2.2337746222  | 2.6344816979  | 1.4526062291  |
| C30  | 1.5557240668  | 3.0309001248  | -0.8905207018 |
| C31  | 3.5224737568  | 2.4016824142  | 1.0319103126  |
| C32  | 1.2628406419  | 2.9592645234  | 0.4826532313  |
| C33  | 0.4870567663  | 3.3488743570  | -1.7904600909 |
| H34  | 4.2933757476  | 2.1531477872  | 1.7567216205  |
| C35  | -0.7746521918 | 3.5869984049  | -1.3485050861 |
| H36  | 0.7085695770  | 3.3952690155  | -2.8540267836 |
| H37  | -1.5712918768 | 3.8233587312  | -2.0486884146 |
| C38  | -1.0915857989 | 3.5319995692  | 0.0457517134  |
| C39  | -2.3581227510 | 3.7589073018  | 0.6020051810  |
| C40  | -0.0550411672 | 3.2148957376  | 0.9342838533  |
| C41  | -2.5369891443 | 3.6597802250  | 1.9635717190  |
| H42  | -3.1926578797 | 4.0042557497  | -0.0498569679 |
| H43  | -3.5072820081 | 3.8248161292  | 2.4165784366  |
| C44  | -1.4502012293 | 3.3345189346  | 2.7796802933  |
| H45  | -1.5378566138 | 3.2307865316  | 3.8575201765  |
| N46  | -0.2469488918 | 3.1300299683  | 2.2739494132  |
| O47  | 0.5092913558  | 2.7305031160  | 5.2084210807  |
| O48  | -1.4106794323 | 0.0438006409  | 4.3792399205  |
| O49  | 1.5176204923  | -0.7387883412 | 4.8217361843  |
| O50  | 3.2953634939  | 2.0663287423  | 4.1186882862  |
| C53  | 3.4324726251  | 1.9815753874  | 5.3673775267  |
| C54  | 2.5160430475  | 2.1940056925  | 6.3937703845  |
| C55  | 1.1642078942  | 2.5373450697  | 6.2545181201  |
| H56  | 4.4456095224  | 1.6963784661  | 5.6950996433  |
| H57  | 2.8864422885  | 2.0721959550  | 7.4064292120  |
| H58  | 0.6079806582  | 2.6466695122  | 7.2023630975  |
| C59  | -1.3135830812 | -0.0615976826 | 5.6301135611  |
| C60  | -0.2269227873 | -0.4149932523 | 6.4254672321  |
| C61  | 1.0705038605  | -0.7142785869 | 5.9882807487  |
| H62  | 1.7914542455  | -0.9569316462 | 6.7887790880  |
| H63  | -0.4014638059 | -0.4516280657 | 7.4958631856  |
| H64  | -2.2440164682 | 0.1588990967  | 6.1786641695  |

---

|     |           |          |         |          |
|-----|-----------|----------|---------|----------|
| 369 | Pd 23 s   | Cor( 4s) | 1.99474 | -3.27287 |
| 370 | Pd 23 s   | Val( 5s) | 0.37988 | 0.50679  |
| 371 | Pd 23 s   | Ryd(11s) | 0.00185 | 16.49941 |
| 372 | Pd 23 s   | Ryd( 6s) | 0.00066 | 1.14686  |
| 373 | Pd 23 s   | Ryd( 7s) | 0.00026 | 2.07602  |
| 374 | Pd 23 s   | Ryd( 8s) | 0.00004 | 6.76453  |
| 375 | Pd 23 s   | Ryd( 9s) | 0.00000 | 10.79665 |
| 376 | Pd 23 s   | Ryd(10s) | 0.00000 | 16.25934 |
| 377 | Pd 23 px  | Cor( 4p) | 1.99665 | -2.05855 |
| 378 | Pd 23 px  | Ryd( 6p) | 0.00144 | 1.30955  |
| 379 | Pd 23 px  | Ryd( 7p) | 0.00034 | 2.20709  |
| 380 | Pd 23 px  | Ryd( 8p) | 0.00049 | 2.69148  |
| 381 | Pd 23 px  | Ryd( 5p) | 0.00023 | 1.04864  |
| 382 | Pd 23 px  | Ryd( 9p) | 0.00001 | 8.52561  |
| 383 | Pd 23 px  | Ryd(10p) | 0.00000 | 11.38764 |
| 384 | Pd 23 py  | Cor( 4p) | 1.99860 | -2.04707 |
| 385 | Pd 23 py  | Ryd( 7p) | 0.00199 | 1.27758  |
| 386 | Pd 23 py  | Ryd( 6p) | 0.00087 | 1.12584  |
| 387 | Pd 23 py  | Ryd( 8p) | 0.00040 | 1.96686  |
| 388 | Pd 23 py  | Ryd( 5p) | 0.00016 | 1.02684  |
| 389 | Pd 23 py  | Ryd( 9p) | 0.00000 | 9.27157  |
| 390 | Pd 23 py  | Ryd(10p) | 0.00000 | 11.46662 |
| 391 | Pd 23 pz  | Cor( 4p) | 1.99615 | -2.06049 |
| 392 | Pd 23 pz  | Ryd( 6p) | 0.00180 | 1.47890  |
| 393 | Pd 23 pz  | Ryd( 7p) | 0.00050 | 2.80258  |
| 394 | Pd 23 pz  | Ryd( 8p) | 0.00054 | 2.82646  |
| 395 | Pd 23 pz  | Ryd( 5p) | 0.00021 | 1.20090  |
| 396 | Pd 23 pz  | Ryd( 9p) | 0.00001 | 8.69422  |
| 397 | Pd 23 pz  | Ryd(10p) | 0.00000 | 11.37760 |
| 398 | Pd 23 dxy | Val( 4d) | 1.95259 | -0.26931 |
| 399 | Pd 23 dxy | Ryd( 6d) | 0.00198 | 1.01104  |
| 400 | Pd 23 dxy | Ryd( 5d) | 0.00055 | 0.75946  |
| 401 | Pd 23 dxy | Ryd( 7d) | 0.00002 | 2.89169  |
| 402 | Pd 23 dxz | Val( 4d) | 1.22760 | -0.25142 |
| 403 | Pd 23 dxz | Ryd( 6d) | 0.00115 | 1.95416  |
| 404 | Pd 23 dxz | Ryd( 5d) | 0.00075 | 1.04903  |
| 405 | Pd 23 dxz | Ryd( 7d) | 0.00005 | 2.67350  |
| 406 | Pd 23 dyz | Val( 4d) | 1.90740 | -0.27116 |
| 407 | Pd 23 dyz | Ryd( 6d) | 0.00159 | 0.80240  |
| 408 | Pd 23 dyz | Ryd( 5d) | 0.00058 | 0.72285  |



---

|     |       |       |          |         |          |
|-----|-------|-------|----------|---------|----------|
| 409 | Pd 23 | dyz   | Ryd( 7d) | 0.00001 | 2.88461  |
| 410 | Pd 23 | dx2y2 | Val( 4d) | 1.93669 | -0.26841 |
| 411 | Pd 23 | dx2y2 | Ryd( 6d) | 0.00286 | 1.49395  |
| 412 | Pd 23 | dx2y2 | Ryd( 5d) | 0.00064 | 0.66156  |
| 413 | Pd 23 | dx2y2 | Ryd( 7d) | 0.00005 | 2.76773  |
| 414 | Pd 23 | dz2   | Val( 4d) | 1.92510 | -0.28006 |
| 415 | Pd 23 | dz2   | Ryd( 6d) | 0.00328 | 1.40982  |
| 416 | Pd 23 | dz2   | Ryd( 5d) | 0.00087 | 0.79675  |
| 417 | Pd 23 | dz2   | Ryd( 7d) | 0.00008 | 2.68248  |
| 418 | Pd 23 | f(0)  | Ryd( 4f) | 0.00027 | 1.71844  |
| 419 | Pd 23 | f(0)  | Ryd( 5f) | 0.00001 | 4.49510  |
| 420 | Pd 23 | f(c1) | Ryd( 4f) | 0.00082 | 1.90734  |
| 421 | Pd 23 | f(c1) | Ryd( 5f) | 0.00004 | 4.65817  |
| 422 | Pd 23 | f(s1) | Ryd( 4f) | 0.00016 | 1.59227  |
| 423 | Pd 23 | f(s1) | Ryd( 5f) | 0.00001 | 4.34672  |
| 424 | Pd 23 | f(c2) | Ryd( 4f) | 0.00063 | 1.83344  |
| 425 | Pd 23 | f(c2) | Ryd( 5f) | 0.00003 | 4.58355  |
| 426 | Pd 23 | f(s2) | Ryd( 4f) | 0.00033 | 1.65220  |
| 427 | Pd 23 | f(s2) | Ryd( 5f) | 0.00001 | 4.40198  |
| 428 | Pd 23 | f(c3) | Ryd( 4f) | 0.00017 | 1.65694  |
| 429 | Pd 23 | f(c3) | Ryd( 5f) | 0.00001 | 4.41794  |
| 430 | Pd 23 | f(s3) | Ryd( 4f) | 0.00015 | 1.62337  |
| 431 | Pd 23 | f(s3) | Ryd( 5f) | 0.00000 | 4.38198  |
| 432 | Pd 24 | s     | Cor( 4s) | 1.99473 | -3.27283 |
| 433 | Pd 24 | s     | Val( 5s) | 0.37977 | 0.50456  |
| 434 | Pd 24 | s     | Ryd(11s) | 0.00204 | 16.52303 |
| 435 | Pd 24 | s     | Ryd( 6s) | 0.00066 | 1.05848  |
| 436 | Pd 24 | s     | Ryd( 7s) | 0.00028 | 1.82610  |
| 437 | Pd 24 | s     | Ryd( 8s) | 0.00003 | 6.54412  |
| 438 | Pd 24 | s     | Ryd( 9s) | 0.00000 | 10.82925 |
| 439 | Pd 24 | s     | Ryd(10s) | 0.00000 | 16.23048 |
| 440 | Pd 24 | px    | Cor( 4p) | 1.99721 | -2.05814 |
| 441 | Pd 24 | px    | Ryd( 6p) | 0.00150 | 1.39483  |
| 442 | Pd 24 | px    | Ryd( 7p) | 0.00039 | 2.20865  |
| 443 | Pd 24 | px    | Ryd( 8p) | 0.00048 | 2.42650  |
| 444 | Pd 24 | px    | Ryd( 5p) | 0.00025 | 1.08952  |
| 445 | Pd 24 | px    | Ryd( 9p) | 0.00001 | 8.48199  |
| 446 | Pd 24 | px    | Ryd(10p) | 0.00000 | 11.38209 |
| 447 | Pd 24 | py    | Cor( 4p) | 1.99863 | -2.04720 |
| 448 | Pd 24 | py    | Ryd( 7p) | 0.00202 | 1.27982  |
| 449 | Pd 24 | py    | Ryd( 6p) | 0.00083 | 1.18194  |

---

|     |       |       |          |         |          |
|-----|-------|-------|----------|---------|----------|
| 450 | Pd 24 | py    | Ryd( 8p) | 0.00048 | 1.83880  |
| 451 | Pd 24 | py    | Ryd( 5p) | 0.00014 | 1.08085  |
| 452 | Pd 24 | py    | Ryd( 9p) | 0.00001 | 9.28497  |
| 453 | Pd 24 | py    | Ryd(10p) | 0.00000 | 11.46170 |
| 454 | Pd 24 | pz    | Cor( 4p) | 1.99553 | -2.06068 |
| 455 | Pd 24 | pz    | Ryd( 6p) | 0.00177 | 1.48812  |
| 456 | Pd 24 | pz    | Ryd( 8p) | 0.00055 | 2.89606  |
| 457 | Pd 24 | pz    | Ryd( 7p) | 0.00050 | 2.74353  |
| 458 | Pd 24 | pz    | Ryd( 5p) | 0.00020 | 1.28081  |
| 459 | Pd 24 | pz    | Ryd( 9p) | 0.00001 | 8.68539  |
| 460 | Pd 24 | pz    | Ryd(10p) | 0.00000 | 11.37856 |
| 461 | Pd 24 | dxy   | Val( 4d) | 1.91668 | -0.26794 |
| 462 | Pd 24 | dxy   | Ryd( 6d) | 0.00184 | 1.06681  |
| 463 | Pd 24 | dxy   | Ryd( 5d) | 0.00054 | 0.80376  |
| 464 | Pd 24 | dxy   | Ryd( 7d) | 0.00002 | 2.90455  |
| 465 | Pd 24 | dxz   | Val( 4d) | 1.49198 | -0.26121 |
| 466 | Pd 24 | dxz   | Ryd( 6d) | 0.00231 | 1.72245  |
| 467 | Pd 24 | dxz   | Ryd( 5d) | 0.00084 | 0.89662  |
| 468 | Pd 24 | dxz   | Ryd( 7d) | 0.00005 | 2.57388  |
| 469 | Pd 24 | dyz   | Val( 4d) | 1.93645 | -0.27209 |
| 470 | Pd 24 | dyz   | Ryd( 6d) | 0.00170 | 0.80735  |
| 471 | Pd 24 | dyz   | Ryd( 5d) | 0.00061 | 0.69854  |
| 472 | Pd 24 | dyz   | Ryd( 7d) | 0.00002 | 2.90198  |
| 473 | Pd 24 | dx2y2 | Val( 4d) | 1.89512 | -0.26647 |
| 474 | Pd 24 | dx2y2 | Ryd( 6d) | 0.00263 | 1.51663  |
| 475 | Pd 24 | dx2y2 | Ryd( 5d) | 0.00064 | 0.70944  |
| 476 | Pd 24 | dx2y2 | Ryd( 7d) | 0.00005 | 2.78153  |
| 477 | Pd 24 | dz2   | Val( 4d) | 1.70956 | -0.27252 |
| 478 | Pd 24 | dz2   | Ryd( 6d) | 0.00240 | 1.52286  |
| 479 | Pd 24 | dz2   | Ryd( 5d) | 0.00086 | 0.88457  |
| 480 | Pd 24 | dz2   | Ryd( 7d) | 0.00007 | 2.68454  |
| 481 | Pd 24 | f(0)  | Ryd( 4f) | 0.00055 | 1.81191  |
| 482 | Pd 24 | f(0)  | Ryd( 5f) | 0.00002 | 4.58148  |
| 483 | Pd 24 | f(c1) | Ryd( 4f) | 0.00063 | 1.84555  |
| 484 | Pd 24 | f(c1) | Ryd( 5f) | 0.00004 | 4.60182  |
| 485 | Pd 24 | f(s1) | Ryd( 4f) | 0.00017 | 1.60499  |
| 486 | Pd 24 | f(s1) | Ryd( 5f) | 0.00001 | 4.36226  |
| 487 | Pd 24 | f(c2) | Ryd( 4f) | 0.00045 | 1.76506  |
| 488 | Pd 24 | f(c2) | Ryd( 5f) | 0.00002 | 4.51663  |
| 489 | Pd 24 | f(s2) | Ryd( 4f) | 0.00026 | 1.63674  |
| 490 | Pd 24 | f(s2) | Ryd( 5f) | 0.00001 | 4.38623  |

|     |       |       |          |         |         |
|-----|-------|-------|----------|---------|---------|
| 491 | Pd 24 | f(c3) | Ryd( 4f) | 0.00022 | 1.66645 |
| 492 | Pd 24 | f(c3) | Ryd( 5f) | 0.00001 | 4.42520 |
| 493 | Pd 24 | f(s3) | Ryd( 4f) | 0.00024 | 1.65233 |
| 494 | Pd 24 | f(s3) | Ryd( 5f) | 0.00001 | 4.41063 |

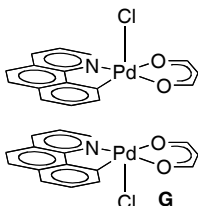

|      |               |              |               |
|------|---------------|--------------|---------------|
| Pd1  | 1.0016249501  | 2.0042562346 | 2.8318015400  |
| H2   | 3.6587435382  | 1.5863531374 | -1.6204929553 |
| C3   | 2.7189826949  | 1.8382950915 | -1.1329593696 |
| H4   | 1.7482850406  | 2.3412426412 | -2.9826476811 |
| C5   | 1.6506154608  | 2.2594537730 | -1.9015806973 |
| C6   | 1.4436614461  | 2.0421110183 | 0.8822531197  |
| C7   | 0.4296989997  | 2.6022849325 | -1.2893603354 |
| C8   | 2.6356254445  | 1.7368035630 | 0.2720372459  |
| C9   | 0.3498664935  | 2.4789857839 | 0.1111377061  |
| C10  | -0.7284563670 | 3.0820148004 | -1.9876577575 |
| H11  | 3.4950977359  | 1.4282713560 | 0.8629406084  |
| C12  | -1.8717694589 | 3.4288906951 | -1.3327585341 |
| H13  | -0.6735467227 | 3.1753119382 | -3.0712440548 |
| H14  | -2.7336910150 | 3.8008843227 | -1.8835131995 |
| C15  | -1.9690531449 | 3.3189796588 | 0.0928200122  |
| C16  | -3.0887870347 | 3.6662265806 | 0.8686869074  |
| C17  | -0.8480527023 | 2.8282837129 | 0.7821416982  |
| C18  | -3.0486849668 | 3.5243478807 | 2.2424185263  |
| H19  | -3.9811669396 | 4.0538881837 | 0.3798194975  |
| H20  | -3.8982965090 | 3.7974357613 | 2.8604774349  |
| C21  | -1.8917652514 | 3.0227894622 | 2.8520155992  |
| H22  | -1.7950013627 | 2.8943624498 | 3.9288087719  |
| N23  | -0.8392381690 | 2.6729373408 | 2.1291813794  |
| O24  | 0.2839545677  | 1.9222332468 | 4.8558353208  |
| O25  | 2.8363925077  | 1.2179725152 | 3.3079123546  |
| Cl26 | 1.7897751467  | 4.3696111074 | 3.0979181873  |
| C27  | 1.0981179632  | 1.6883248003 | 5.7830078919  |
| C28  | 2.4515078471  | 1.3276489454 | 5.6927881178  |
| H29  | 2.9795659651  | 1.1697345207 | 6.6287068095  |
| C30  | 3.1773090737  | 1.1095953610 | 4.5260286117  |
| H31  | 4.2168253145  | 0.7734388863 | 4.6659371394  |

H32      0.6933096453      1.7569447955      6.8082692225

|    |    |   |     |          |         |          |
|----|----|---|-----|----------|---------|----------|
| 1  | Pd | 1 | s   | Cor( 4s) | 0.99729 | -3.33462 |
| 2  | Pd | 1 | s   | Val( 5s) | 0.17344 | 0.49709  |
| 3  | Pd | 1 | s   | Ryd(11s) | 0.00084 | 15.50416 |
| 4  | Pd | 1 | s   | Ryd( 6s) | 0.00067 | 0.85018  |
| 5  | Pd | 1 | s   | Ryd( 8s) | 0.00010 | 4.19872  |
| 6  | Pd | 1 | s   | Ryd( 9s) | 0.00001 | 10.62284 |
| 7  | Pd | 1 | s   | Ryd( 7s) | 0.00000 | 3.67103  |
| 8  | Pd | 1 | s   | Ryd(10s) | 0.00000 | 13.46525 |
| 9  | Pd | 1 | px  | Cor( 4p) | 0.99899 | -2.11775 |
| 10 | Pd | 1 | px  | Ryd( 7p) | 0.00110 | 1.16486  |
| 11 | Pd | 1 | px  | Ryd( 6p) | 0.00050 | 1.14063  |
| 12 | Pd | 1 | px  | Ryd( 8p) | 0.00025 | 2.83615  |
| 13 | Pd | 1 | px  | Ryd( 5p) | 0.00007 | 0.53961  |
| 14 | Pd | 1 | px  | Ryd( 9p) | 0.00000 | 9.42728  |
| 15 | Pd | 1 | px  | Ryd(10p) | 0.00000 | 11.24271 |
| 16 | Pd | 1 | py  | Cor( 4p) | 0.99950 | -2.12106 |
| 17 | Pd | 1 | py  | Ryd( 5p) | 0.00593 | 0.53829  |
| 18 | Pd | 1 | py  | Ryd( 7p) | 0.00069 | 0.74853  |
| 19 | Pd | 1 | py  | Ryd( 8p) | 0.00012 | 2.17276  |
| 20 | Pd | 1 | py  | Ryd( 6p) | 0.00004 | 0.55183  |
| 21 | Pd | 1 | py  | Ryd( 9p) | 0.00000 | 9.44446  |
| 22 | Pd | 1 | py  | Ryd(10p) | 0.00000 | 11.28856 |
| 23 | Pd | 1 | pz  | Cor( 4p) | 0.99754 | -2.11744 |
| 24 | Pd | 1 | pz  | Ryd( 7p) | 0.00097 | 2.42182  |
| 25 | Pd | 1 | pz  | Ryd( 6p) | 0.00060 | 1.55767  |
| 26 | Pd | 1 | pz  | Ryd( 8p) | 0.00026 | 2.73259  |
| 27 | Pd | 1 | pz  | Ryd( 5p) | 0.00007 | 0.56262  |
| 28 | Pd | 1 | pz  | Ryd( 9p) | 0.00000 | 9.29665  |
| 29 | Pd | 1 | pz  | Ryd(10p) | 0.00000 | 11.26896 |
| 30 | Pd | 1 | dxy | Val( 4d) | 0.95584 | -0.33291 |
| 31 | Pd | 1 | dxy | Ryd( 6d) | 0.00104 | 1.15715  |
| 32 | Pd | 1 | dxy | Ryd( 5d) | 0.00037 | 0.38657  |
| 33 | Pd | 1 | dxy | Ryd( 7d) | 0.00003 | 2.70939  |
| 34 | Pd | 1 | dxz | Val( 4d) | 0.89854 | -0.32352 |
| 35 | Pd | 1 | dxz | Ryd( 6d) | 0.00164 | 1.48906  |
| 36 | Pd | 1 | dxz | Ryd( 5d) | 0.00050 | 0.53786  |
| 37 | Pd | 1 | dxz | Ryd( 7d) | 0.00002 | 2.46912  |
| 38 | Pd | 1 | dyz | Val( 4d) | 0.98038 | -0.33273 |
| 39 | Pd | 1 | dyz | Ryd( 6d) | 0.00072 | 0.79745  |

|    |    |   |                   |          |         |          |
|----|----|---|-------------------|----------|---------|----------|
| 40 | Pd | 1 | d <sub>yz</sub>   | Ryd( 5d) | 0.00074 | 0.41525  |
| 41 | Pd | 1 | d <sub>yz</sub>   | Ryd( 7d) | 0.00002 | 2.75813  |
| 42 | Pd | 1 | d <sub>x2y2</sub> | Val( 4d) | 0.96243 | -0.33561 |
| 43 | Pd | 1 | d <sub>x2y2</sub> | Ryd( 6d) | 0.00134 | 1.34134  |
| 44 | Pd | 1 | d <sub>x2y2</sub> | Ryd( 5d) | 0.00033 | 0.38438  |
| 45 | Pd | 1 | d <sub>x2y2</sub> | Ryd( 7d) | 0.00003 | 2.71173  |
| 46 | Pd | 1 | d <sub>z2</sub>   | Val( 4d) | 0.76893 | -0.32067 |
| 47 | Pd | 1 | d <sub>z2</sub>   | Ryd( 6d) | 0.00080 | 1.72004  |
| 48 | Pd | 1 | d <sub>z2</sub>   | Ryd( 5d) | 0.00031 | 0.57572  |
| 49 | Pd | 1 | d <sub>z2</sub>   | Ryd( 7d) | 0.00003 | 2.71568  |
| 50 | Pd | 1 | f(0)              | Ryd( 4f) | 0.00040 | 1.83330  |
| 51 | Pd | 1 | f(0)              | Ryd( 5f) | 0.00002 | 4.59235  |
| 52 | Pd | 1 | f(c1)             | Ryd( 4f) | 0.00029 | 1.70661  |
| 53 | Pd | 1 | f(c1)             | Ryd( 5f) | 0.00001 | 4.48627  |
| 54 | Pd | 1 | f(s1)             | Ryd( 4f) | 0.00018 | 1.53460  |
| 55 | Pd | 1 | f(s1)             | Ryd( 5f) | 0.00000 | 4.33357  |
| 56 | Pd | 1 | f(c2)             | Ryd( 4f) | 0.00014 | 1.59456  |
| 57 | Pd | 1 | f(c2)             | Ryd( 5f) | 0.00000 | 4.38144  |
| 58 | Pd | 1 | f(s2)             | Ryd( 4f) | 0.00012 | 1.54631  |
| 59 | Pd | 1 | f(s2)             | Ryd( 5f) | 0.00000 | 4.33613  |
| 60 | Pd | 1 | f(c3)             | Ryd( 4f) | 0.00019 | 1.53913  |
| 61 | Pd | 1 | f(c3)             | Ryd( 5f) | 0.00000 | 4.33368  |
| 62 | Pd | 1 | f(s3)             | Ryd( 4f) | 0.00026 | 1.64441  |
| 63 | Pd | 1 | f(s3)             | Ryd( 5f) | 0.00000 | 4.42841  |

| Atom No | Charge | Natural Population |          | Natural |         | Spin Density |          |
|---------|--------|--------------------|----------|---------|---------|--------------|----------|
|         |        | Natural            | Core     | Valence | Rydberg |              | Total    |
| Pd      | 1      | 0.87098            | 35.98537 | 9.10501 | 0.03865 | 45.12902     | 0.38026  |
| H       | 2      | 0.20837            | 0.00000  | 0.79015 | 0.00148 | 0.79163      | 0.00036  |
| C       | 3      | -0.17573           | 1.99930  | 4.15774 | 0.01869 | 6.17573      | -0.00521 |
| H       | 4      | 0.20551            | 0.00000  | 0.79245 | 0.00204 | 0.79449      | -0.00037 |
| C       | 5      | -0.18321           | 1.99899  | 4.16699 | 0.01723 | 6.18321      | 0.01019  |
| C       | 6      | -0.03091           | 1.99889  | 3.99099 | 0.04104 | 6.03091      | 0.01643  |
| C       | 7      | -0.07645           | 1.99920  | 4.05249 | 0.02476 | 6.07645      | -0.00273 |
| C       | 8      | -0.22905           | 1.99894  | 4.20919 | 0.02093 | 6.22905      | 0.01187  |
| C       | 9      | -0.03979           | 1.99879  | 4.02880 | 0.01221 | 6.03979      | 0.00476  |
| C       | 10     | -0.14014           | 1.99900  | 4.12411 | 0.01703 | 6.14014      | 0.00281  |
| H       | 11     | 0.23480            | 0.00000  | 0.76308 | 0.00213 | 0.76520      | -0.00031 |
| C       | 12     | -0.19103           | 1.99922  | 4.17398 | 0.01783 | 6.19103      | -0.00297 |

|       |          |         |         |         |          |          |
|-------|----------|---------|---------|---------|----------|----------|
| H 13  | 0.20875  | 0.00000 | 0.78919 | 0.00207 | 0.79125  | -0.00010 |
| H 14  | 0.20915  | 0.00000 | 0.78904 | 0.00181 | 0.79085  | 0.00026  |
| C 15  | -0.09591 | 1.99908 | 4.07895 | 0.01788 | 6.09591  | 0.00347  |
| C 16  | -0.09780 | 1.99900 | 4.08220 | 0.01660 | 6.09780  | -0.00064 |
| C 17  | 0.22079  | 1.99894 | 3.75174 | 0.02853 | 5.77921  | -0.00435 |
| C 18  | -0.25051 | 1.99929 | 4.23555 | 0.01567 | 6.25051  | 0.00340  |
| H 19  | 0.21181  | 0.00000 | 0.78617 | 0.00202 | 0.78819  | 0.00016  |
| H 20  | 0.22181  | 0.00000 | 0.77679 | 0.00139 | 0.77819  | 0.00010  |
| C 21  | 0.10698  | 1.99930 | 3.86985 | 0.02387 | 5.89302  | -0.00046 |
| H 22  | 0.23078  | 0.00000 | 0.76753 | 0.00168 | 0.76922  | 0.00090  |
| N 23  | -0.44121 | 1.99927 | 5.41237 | 0.02958 | 7.44121  | 0.04326  |
| O 24  | -0.66942 | 1.99978 | 6.65087 | 0.01877 | 8.66942  | 0.00775  |
| O 25  | -0.62619 | 1.99977 | 6.60647 | 0.01995 | 8.62619  | 0.05054  |
| Cl 26 | -0.44822 | 9.99989 | 7.44419 | 0.00414 | 17.44822 | 0.47731  |
| C 27  | 0.39629  | 1.99938 | 3.57014 | 0.03419 | 5.60371  | -0.00508 |
| C 28  | -0.50606 | 1.99923 | 4.49041 | 0.01642 | 6.50606  | 0.01386  |
| H 29  | 0.21750  | 0.00000 | 0.78144 | 0.00106 | 0.78250  | -0.00055 |
| C 30  | 0.37453  | 1.99933 | 3.59254 | 0.03360 | 5.62547  | -0.00833 |
| H 31  | 0.14918  | 0.00000 | 0.84809 | 0.00273 | 0.85082  | 0.00346  |
| H 32  | 0.13441  | 0.00000 | 0.86251 | 0.00308 | 0.86559  | -0.00005 |

=====

\* Total \* 0.00001 83.96992 108.54100 0.48908 192.99999 1.00000

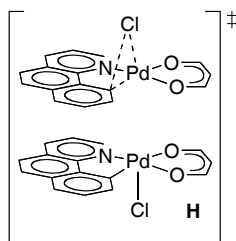

|     |               |              |               |
|-----|---------------|--------------|---------------|
| Pd1 | 0.9969589639  | 2.0358552046 | 2.8516534014  |
| H2  | 3.5503921570  | 1.2830865583 | -1.6154386763 |
| C3  | 2.6595375600  | 1.6599466404 | -1.1183008672 |
| H4  | 1.6087841096  | 1.9832012120 | -2.9724748309 |
| C5  | 1.5656154686  | 2.0457541631 | -1.8863603532 |
| C6  | 1.5159797410  | 2.2952923914 | 0.9369529562  |
| C7  | 0.3716837934  | 2.4934421495 | -1.2679055304 |
| C8  | 2.6540171062  | 1.7726194777 | 0.2703808235  |
| C9  | 0.3512852311  | 2.5622527133 | 0.1293237832  |
| C10 | -0.8189511016 | 2.8423208514 | -1.9813187283 |
| H11 | 3.5286997174  | 1.5174540237 | 0.8645956406  |

|      |               |              |               |
|------|---------------|--------------|---------------|
| C12  | -1.9604095251 | 3.2095016230 | -1.3294340674 |
| H13  | -0.8011695118 | 2.8056646695 | -3.0693878102 |
| H14  | -2.8566323699 | 3.4721379781 | -1.8884490887 |
| C15  | -2.0177941115 | 3.2207806300 | 0.0975458876  |
| C16  | -3.1634191319 | 3.5041677431 | 0.8647881171  |
| C17  | -0.8479155107 | 2.8750099521 | 0.8000992040  |
| C18  | -3.1077654872 | 3.4122801597 | 2.2395343191  |
| H19  | -4.0895536383 | 3.7821770255 | 0.3642936386  |
| H20  | -3.9791108777 | 3.6215344562 | 2.8524918375  |
| C21  | -1.9095805566 | 3.0231685782 | 2.8599910195  |
| H22  | -1.8192889421 | 2.9020915267 | 3.9382008026  |
| N23  | -0.8200737027 | 2.7655260697 | 2.1576577071  |
| O24  | 0.2508997894  | 1.8815222239 | 4.8280755817  |
| O25  | 2.8427932069  | 1.2644644821 | 3.3193556899  |
| Cl26 | 2.3122418043  | 4.3825830025 | 1.3117125380  |
| C27  | 0.9936363227  | 1.4346178676 | 5.7414391987  |
| C28  | 2.3151304518  | 0.9801423196 | 5.6586103312  |
| H29  | 2.7723121952  | 0.6318489615 | 6.5805974764  |
| C30  | 3.1072269974  | 0.9304713358 | 4.5104208875  |
| H31  | 4.1272105046  | 0.5367977049 | 4.6531485546  |
| H32  | 0.5388453787  | 1.3924739679 | 6.7470384335  |

|    |         |          |         |          |
|----|---------|----------|---------|----------|
| 1  | Pd 1 s  | Cor( 4s) | 0.99678 | -3.28498 |
| 2  | Pd 1 s  | Val( 5s) | 0.17457 | 0.42548  |
| 3  | Pd 1 s  | Ryd(11s) | 0.00116 | 14.08277 |
| 4  | Pd 1 s  | Ryd( 7s) | 0.00024 | 5.14390  |
| 5  | Pd 1 s  | Ryd( 6s) | 0.00011 | 1.99047  |
| 6  | Pd 1 s  | Ryd( 9s) | 0.00002 | 6.03835  |
| 7  | Pd 1 s  | Ryd( 8s) | 0.00000 | 6.02424  |
| 8  | Pd 1s   | Ryd(10s) | 0.00000 | 11.78363 |
| 9  | Pd 1 px | Cor( 4p) | 0.99883 | -2.07316 |
| 10 | Pd 1 px | Ryd( 5p) | 0.00071 | 0.84338  |
| 11 | Pd 1 px | Ryd( 7p) | 0.00024 | 1.40231  |
| 12 | Pd 1 px | Ryd( 8p) | 0.00014 | 2.35423  |
| 13 | Pd 1 px | Ryd( 6p) | 0.00010 | 0.94806  |
| 14 | Pd 1 px | Ryd( 9p) | 0.00000 | 9.55821  |
| 15 | Pd 1 px | Ryd(10p) | 0.00000 | 11.18805 |
| 16 | Pd 1 py | Cor( 4p) | 0.99932 | -2.06353 |
| 17 | Pd 1 py | Ryd( 5p) | 0.00144 | 0.46988  |
| 18 | Pd 1 py | Ryd( 7p) | 0.00028 | 1.08163  |
| 19 | Pd 1 py | Ryd( 8p) | 0.00009 | 1.49131  |

---

|    |    |   |       |          |         |          |
|----|----|---|-------|----------|---------|----------|
| 20 | Pd | 1 | py    | Ryd( 6p) | 0.00010 | 0.80447  |
| 21 | Pd | 1 | py    | Ryd( 9p) | 0.00000 | 9.60461  |
| 22 | Pd | 1 | py    | Ryd(10p) | 0.00000 | 11.31053 |
| 23 | Pd | 1 | pz    | Cor( 4p) | 0.99749 | -2.07527 |
| 24 | Pd | 1 | pz    | Ryd( 6p) | 0.00097 | 1.04913  |
| 25 | Pd | 1 | pz    | Ryd( 7p) | 0.00040 | 1.58911  |
| 26 | Pd | 1 | pz    | Ryd( 8p) | 0.00017 | 2.37704  |
| 27 | Pd | 1 | pz    | Ryd( 5p) | 0.00009 | 0.98819  |
| 28 | Pd | 1 | pz    | Ryd( 9p) | 0.00000 | 9.63232  |
| 29 | Pd | 1 | pz    | Ryd(10p) | 0.00000 | 11.20976 |
| 30 | Pd | 1 | dxy   | Val( 4d) | 0.93010 | -0.28133 |
| 31 | Pd | 1 | dxy   | Ryd( 6d) | 0.00076 | 1.23751  |
| 32 | Pd | 1 | dxy   | Ryd( 5d) | 0.00024 | 0.47486  |
| 33 | Pd | 1 | dxy   | Ryd( 7d) | 0.00002 | 2.77756  |
| 34 | Pd | 1 | dxz   | Val( 4d) | 0.87061 | -0.28739 |
| 35 | Pd | 1 | dxz   | Ryd( 6d) | 0.00161 | 1.46850  |
| 36 | Pd | 1 | dxz   | Ryd( 5d) | 0.00035 | 0.56698  |
| 37 | Pd | 1 | dxz   | Ryd( 7d) | 0.00003 | 2.59209  |
| 38 | Pd | 1 | dyz   | Val( 4d) | 0.97298 | -0.28900 |
| 39 | Pd | 1 | dyz   | Ryd( 6d) | 0.00094 | 0.94046  |
| 40 | Pd | 1 | dyz   | Ryd( 5d) | 0.00024 | 0.42765  |
| 41 | Pd | 1 | dyz   | Ryd( 7d) | 0.00001 | 2.78455  |
| 42 | Pd | 1 | dx2y2 | Val( 4d) | 0.95111 | -0.28319 |
| 43 | Pd | 1 | dx2y2 | Ryd( 6d) | 0.00099 | 1.43600  |
| 44 | Pd | 1 | dx2y2 | Ryd( 5d) | 0.00030 | 0.52734  |
| 45 | Pd | 1 | dx2y2 | Ryd( 7d) | 0.00002 | 2.76624  |
| 46 | Pd | 1 | dz2   | Val( 4d) | 0.76538 | -0.28183 |
| 47 | Pd | 1 | dz2   | Ryd( 6d) | 0.00075 | 1.65181  |
| 48 | Pd | 1 | dz2   | Ryd( 5d) | 0.00051 | 0.64097  |
| 49 | Pd | 1 | dz2   | Ryd( 7d) | 0.00003 | 2.60334  |
| 50 | Pd | 1 | f(0)  | Ryd( 4f) | 0.00036 | 1.78314  |
| 51 | Pd | 1 | f(0)  | Ryd( 5f) | 0.00001 | 4.56737  |
| 52 | Pd | 1 | f(c1) | Ryd( 4f) | 0.00029 | 1.72866  |
| 53 | Pd | 1 | f(c1) | Ryd( 5f) | 0.00002 | 4.51107  |
| 54 | Pd | 1 | f(s1) | Ryd( 4f) | 0.00011 | 1.62050  |
| 55 | Pd | 1 | f(s1) | Ryd( 5f) | 0.00000 | 4.39583  |
| 56 | Pd | 1 | f(c2) | Ryd( 4f) | 0.00010 | 1.64258  |
| 57 | Pd | 1 | f(c2) | Ryd( 5f) | 0.00000 | 4.41492  |
| 58 | Pd | 1 | f(s2) | Ryd( 4f) | 0.00010 | 1.61045  |
| 59 | Pd | 1 | f(s2) | Ryd( 5f) | 0.00000 | 4.38206  |
| 60 | Pd | 1 | f(c3) | Ryd( 4f) | 0.00010 | 1.58211  |



|    |    |   |       |          |         |         |
|----|----|---|-------|----------|---------|---------|
| 61 | Pd | 1 | f(c3) | Ryd( 5f) | 0.00000 | 4.34870 |
| 62 | Pd | 1 | f(s3) | Ryd( 4f) | 0.00020 | 1.67112 |
| 63 | Pd | 1 | f(s3) | Ryd( 5f) | 0.00001 | 4.44971 |

| Atom No | Charge   | Natural Population |         |         | Natural Spin |          |
|---------|----------|--------------------|---------|---------|--------------|----------|
|         |          | Core               | Valence | Rydberg | Total        | Density  |
| Pd 1    | 0.70994  | 35.98479           | 9.27666 | 0.02861 | 45.29006     | 0.05306  |
| H 2     | 0.21214  | 0.00000            | 0.78623 | 0.00162 | 0.78786      | 0.00375  |
| C 3     | -0.20794 | 1.99925            | 4.19134 | 0.01735 | 6.20794      | -0.12763 |
| H 4     | 0.20450  | 0.00000            | 0.79381 | 0.00168 | 0.79550      | -0.01277 |
| C 5     | -0.13613 | 1.99922            | 4.11933 | 0.01758 | 6.13613      | 0.30411  |
| C 6     | -0.03019 | 1.99875            | 3.99696 | 0.03447 | 6.03019      | -0.02887 |
| C 7     | -0.05303 | 1.99886            | 4.03477 | 0.01940 | 6.05303      | -0.07322 |
| C 8     | -0.17077 | 1.99912            | 4.14733 | 0.02433 | 6.17077      | 0.29564  |
| C 9     | -0.10156 | 1.99879            | 4.07424 | 0.02852 | 6.10156      | 0.13487  |
| C 10    | -0.14333 | 1.99902            | 4.12616 | 0.01814 | 6.14333      | 0.04805  |
| H 11    | 0.23547  | 0.00000            | 0.76270 | 0.00183 | 0.76453      | -0.01218 |
| C 12    | -0.18293 | 1.99921            | 4.16657 | 0.01715 | 6.18293      | -0.04516 |
| H 13    | 0.20884  | 0.00000            | 0.78896 | 0.00221 | 0.79116      | -0.00198 |
| H 14    | 0.20954  | 0.00000            | 0.78874 | 0.00172 | 0.79046      | 0.00180  |
| C 15    | -0.11155 | 1.99915            | 4.08835 | 0.02404 | 6.11155      | 0.04413  |
| C 16    | -0.10377 | 1.99900            | 4.08834 | 0.01644 | 6.10377      | -0.02152 |
| C 17    | 0.30229  | 1.99889            | 3.68244 | 0.01637 | 5.69771      | -0.03742 |
| C 18    | -0.24936 | 1.99928            | 4.23340 | 0.01668 | 6.24936      | 0.04269  |
| H 19    | 0.21185  | 0.00000            | 0.78624 | 0.00192 | 0.78815      | 0.00075  |
| H 20    | 0.22099  | 0.00000            | 0.77764 | 0.00138 | 0.77901      | -0.00171 |
| C 21    | 0.10430  | 1.99932            | 3.87062 | 0.02576 | 5.89570      | -0.01558 |
| H 22    | 0.22663  | 0.00000            | 0.77163 | 0.00174 | 0.77337      | 0.00065  |
| N 23    | -0.46325 | 1.99933            | 5.42700 | 0.03692 | 7.46325      | 0.04142  |
| O 24    | -0.67213 | 1.99978            | 6.65377 | 0.01858 | 8.67213      | 0.00867  |
| O 25    | -0.63254 | 1.99976            | 6.61237 | 0.02041 | 8.63254      | 0.01186  |
| Cl 26   | -0.31763 | 9.99988            | 7.31121 | 0.00654 | 17.31763     | 0.38575  |
| C 27    | 0.38192  | 1.99937            | 3.58457 | 0.03414 | 5.61808      | -0.00109 |
| C 28    | -0.51793 | 1.99924            | 4.50210 | 0.01659 | 6.51793      | 0.00036  |
| H 29    | 0.21554  | 0.00000            | 0.78339 | 0.00108 | 0.78446      | -0.00006 |
| C 30    | 0.37477  | 1.99934            | 3.59188 | 0.03401 | 5.62523      | -0.00132 |
| H 31    | 0.14188  | 0.00000            | 0.85523 | 0.00290 | 0.85812      | 0.00155  |
| H 32    | 0.13345  | 0.00000            | 0.86346 | 0.00309 | 0.86655      | 0.00140  |

=====

\* Total \* 0.00000 83.96935 108.53744 0.49321 193.00000 1.00000

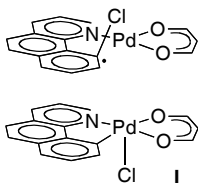

The Pd(I) fragment of complex **I** is best represented as a Pd(II) metal center with a ligand-centered radical. This formulation is supported by the SOMO orbital coefficients, illustrated below:

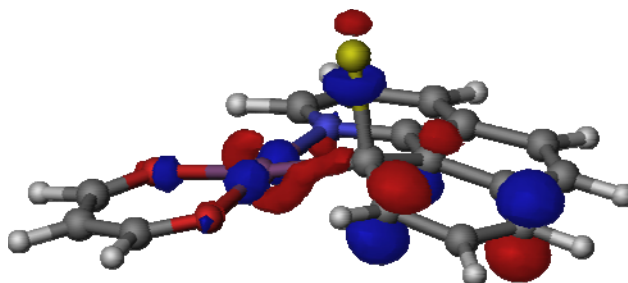

|     |               |              |               |
|-----|---------------|--------------|---------------|
| Pd1 | 1.0045652621  | 2.0592010358 | 2.8338608793  |
| H2  | 3.4785735284  | 1.0440705665 | -1.5092739932 |
| C3  | 2.6268067785  | 1.5364487766 | -1.0450067154 |
| H4  | 1.5279673432  | 1.6702439545 | -2.9070954413 |
| C5  | 1.5224622284  | 1.8725371043 | -1.8375220019 |
| C6  | 1.5997424804  | 2.5622575110 | 0.9415194412  |
| C7  | 0.3561934095  | 2.4159988525 | -1.2411252551 |
| C8  | 2.6859095570  | 1.8538431147 | 0.2979493016  |
| C9  | 0.3722655617  | 2.6612276452 | 0.1357720769  |
| C10 | -0.8585101373 | 2.6582450916 | -1.9597351960 |
| H11 | 3.5780882796  | 1.6603544685 | 0.8892369976  |
| C12 | -1.9972919593 | 3.0636961123 | -1.3268400758 |
| H13 | -0.8600326291 | 2.5006813553 | -3.0372558789 |
| H14 | -2.9117819474 | 3.2432428249 | -1.8893217253 |
| C15 | -2.0318710855 | 3.1851127157 | 0.0938733433  |
| C16 | -3.1864229834 | 3.4374949807 | 0.8567174471  |
| C17 | -0.8343635941 | 2.9447613832 | 0.8004340397  |
| C18 | -3.1239426370 | 3.3964428319 | 2.2337181390  |
| H19 | -4.1288431250 | 3.6369099278 | 0.3493169329  |
| H20 | -4.0053838248 | 3.5729292129 | 2.8424733069  |
| C21 | -1.9080828479 | 3.0719654024 | 2.8577382483  |
| H22 | -1.8178528989 | 2.9525051015 | 3.9361439965  |
| N23 | -0.8072344688 | 2.8562520346 | 2.1610215010  |
| O24 | 0.2131540788  | 1.7373100867 | 4.7946201542  |

|      |              |              |              |
|------|--------------|--------------|--------------|
| O25  | 2.8538791431 | 1.2499819203 | 3.2886265155 |
| Cl26 | 2.2375941418 | 4.3142703574 | 1.3309780739 |
| C27  | 0.9429977424 | 1.2215455487 | 5.6790001603 |
| C28  | 2.2703484395 | 0.7814684228 | 5.5851505974 |
| H29  | 2.7105235933 | 0.3630063629 | 6.4862688971 |
| C30  | 3.0896323206 | 0.8254967025 | 4.4556035418 |
| H31  | 4.1089489737 | 0.4262597947 | 4.5965413995 |
| H32  | 0.4742871062 | 1.0943060951 | 6.6723889155 |

|    |    |   |     |          |         |          |
|----|----|---|-----|----------|---------|----------|
| 1  | Pd | 1 | s   | Cor( 4s) | 0.99711 | -3.28369 |
| 2  | Pd | 1 | s   | Val( 5s) | 0.17365 | 0.39759  |
| 3  | Pd | 1 | s   | Ryd(11s) | 0.00100 | 11.02474 |
| 4  | Pd | 1 | s   | Ryd(10s) | 0.00021 | 10.64571 |
| 5  | Pd | 1 | s   | Ryd( 6s) | 0.00009 | 2.56819  |
| 6  | Pd | 1 | s   | Ryd( 7s) | 0.00001 | 3.83082  |
| 7  | Pd | 1 | s   | Ryd( 8s) | 0.00000 | 6.75389  |
| 8  | Pd | 1 | s   | Ryd( 9s) | 0.00000 | 10.43320 |
| 9  | Pd | 1 | px  | Cor( 4p) | 0.99885 | -2.06474 |
| 10 | Pd | 1 | px  | Ryd( 5p) | 0.00073 | 0.75808  |
| 11 | Pd | 1 | px  | Ryd( 7p) | 0.00026 | 1.41802  |
| 12 | Pd | 1 | px  | Ryd( 6p) | 0.00015 | 1.08537  |
| 13 | Pd | 1 | px  | Ryd( 8p) | 0.00009 | 1.87041  |
| 14 | Pd | 1 | px  | Ryd( 9p) | 0.00000 | 9.78358  |
| 15 | Pd | 1 | px  | Ryd(10p) | 0.00000 | 11.29528 |
| 16 | Pd | 1 | py  | Cor( 4p) | 0.99938 | -2.05581 |
| 17 | Pd | 1 | py  | Ryd( 5p) | 0.00162 | 0.51621  |
| 18 | Pd | 1 | py  | Ryd( 7p) | 0.00024 | 1.20715  |
| 19 | Pd | 1 | py  | Ryd( 6p) | 0.00013 | 0.65513  |
| 20 | Pd | 1 | py  | Ryd( 8p) | 0.00007 | 1.53398  |
| 21 | Pd | 1 | py  | Ryd( 9p) | 0.00000 | 9.72393  |
| 22 | Pd | 1 | py  | Ryd(10p) | 0.00000 | 11.39588 |
| 23 | Pd | 1 | pz  | Cor( 4p) | 0.99765 | -2.06660 |
| 24 | Pd | 1 | pz  | Ryd( 5p) | 0.00104 | 0.87143  |
| 25 | Pd | 1 | pz  | Ryd( 7p) | 0.00042 | 1.40776  |
| 26 | Pd | 1 | pz  | Ryd( 6p) | 0.00010 | 1.03455  |
| 27 | Pd | 1 | pz  | Ryd( 8p) | 0.00005 | 1.92898  |
| 28 | Pd | 1 | pz  | Ryd( 9p) | 0.00000 | 9.86915  |
| 29 | Pd | 1 | pz  | Ryd(10p) | 0.00000 | 11.32838 |
| 30 | Pd | 1 | dxy | Val( 4d) | 0.92231 | -0.27417 |
| 31 | Pd | 1 | dxy | Ryd( 6d) | 0.00080 | 1.26443  |
| 32 | Pd | 1 | dxy | Ryd( 5d) | 0.00019 | 0.45961  |

|    |    |   |       |          |         |          |
|----|----|---|-------|----------|---------|----------|
| 33 | Pd | 1 | dxy   | Ryd( 7d) | 0.00002 | 2.74808  |
| 34 | Pd | 1 | dxz   | Val( 4d) | 0.88320 | -0.28110 |
| 35 | Pd | 1 | dxz   | Ryd( 6d) | 0.00144 | 1.41835  |
| 36 | Pd | 1 | dxz   | Ryd( 5d) | 0.00032 | 0.56879  |
| 37 | Pd | 1 | dxz   | Ryd( 7d) | 0.00002 | 2.61643  |
| 38 | Pd | 1 | dyz   | Val( 4d) | 0.97287 | -0.28223 |
| 39 | Pd | 1 | dyz   | Ryd( 6d) | 0.00094 | 1.09686  |
| 40 | Pd | 1 | dyz   | Ryd( 5d) | 0.00026 | 0.43352  |
| 41 | Pd | 1 | dyz   | Ryd( 7d) | 0.00002 | 2.79257  |
| 42 | Pd | 1 | dx2y2 | Val( 4d) | 0.95922 | -0.27731 |
| 43 | Pd | 1 | dx2y2 | Ryd( 6d) | 0.00101 | 1.33854  |
| 44 | Pd | 1 | dx2y2 | Ryd( 5d) | 0.00021 | 0.49189  |
| 45 | Pd | 1 | dx2y2 | Ryd( 7d) | 0.00002 | 2.76461  |
| 46 | Pd | 1 | dz2   | Val( 4d) | 0.80631 | -0.27538 |
| 47 | Pd | 1 | dz2   | Ryd( 6d) | 0.00070 | 1.51735  |
| 48 | Pd | 1 | dz2   | Ryd( 5d) | 0.00038 | 0.61436  |
| 49 | Pd | 1 | dz2   | Ryd( 7d) | 0.00003 | 2.59058  |
| 50 | Pd | 1 | f(0)  | Ryd( 4f) | 0.00026 | 1.72620  |
| 51 | Pd | 1 | f(0)  | Ryd( 5f) | 0.00001 | 4.50733  |
| 52 | Pd | 1 | f(c1) | Ryd( 4f) | 0.00025 | 1.72785  |
| 53 | Pd | 1 | f(c1) | Ryd( 5f) | 0.00002 | 4.51249  |
| 54 | Pd | 1 | f(s1) | Ryd( 4f) | 0.00013 | 1.67138  |
| 55 | Pd | 1 | f(s1) | Ryd( 5f) | 0.00000 | 4.45321  |
| 56 | Pd | 1 | f(c2) | Ryd( 4f) | 0.00009 | 1.64284  |
| 57 | Pd | 1 | f(c2) | Ryd( 5f) | 0.00000 | 4.41130  |
| 58 | Pd | 1 | f(s2) | Ryd( 4f) | 0.00012 | 1.64903  |
| 59 | Pd | 1 | f(s2) | Ryd( 5f) | 0.00000 | 4.42096  |
| 60 | Pd | 1 | f(c3) | Ryd( 4f) | 0.00009 | 1.58333  |
| 61 | Pd | 1 | f(c3) | Ryd( 5f) | 0.00000 | 4.34724  |
| 62 | Pd | 1 | f(s3) | Ryd( 4f) | 0.00019 | 1.68303  |
| 63 | Pd | 1 | f(s3) | Ryd( 5f) | 0.00001 | 4.46131  |

| Atom No | Charge   | Natural Population |         |         | Total    | Natural Spin Density |
|---------|----------|--------------------|---------|---------|----------|----------------------|
|         |          | Core               | Valence | Rydberg |          |                      |
| Pd 1    | 0.67211  | 35.98622           | 9.31424 | 0.02743 | 45.32789 | 0.12072              |
| H 2     | 0.21091  | 0.00000            | 0.78733 | 0.00177 | 0.78909  | 0.00424              |
| C 3     | -0.22192 | 1.99925            | 4.20553 | 0.01714 | 6.22192  | -0.14663             |
| H 4     | 0.20228  | 0.00000            | 0.79609 | 0.00163 | 0.79772  | -0.01720             |
| C 5     | -0.14871 | 1.99923            | 4.13222 | 0.01726 | 6.14871  | 0.40920              |

|       |          |         |         |         |          |          |
|-------|----------|---------|---------|---------|----------|----------|
| C 6   | -0.10517 | 1.99867 | 4.07215 | 0.03435 | 6.10517  | -0.06161 |
| C 7   | -0.05857 | 1.99885 | 4.04034 | 0.01937 | 6.05857  | -0.09752 |
| C 8   | -0.16389 | 1.99914 | 4.14021 | 0.02455 | 6.16389  | 0.36315  |
| C 9   | -0.08912 | 1.99901 | 4.05882 | 0.03128 | 6.08912  | 0.19056  |
| C 10  | -0.14634 | 1.99901 | 4.12948 | 0.01784 | 6.14634  | 0.06414  |
| H 11  | 0.23168  | 0.00000 | 0.76660 | 0.00172 | 0.76832  | -0.01485 |
| C 12  | -0.18446 | 1.99921 | 4.16824 | 0.01702 | 6.18446  | -0.06174 |
| H 13  | 0.20812  | 0.00000 | 0.78970 | 0.00218 | 0.79188  | -0.00264 |
| H 14  | 0.20868  | 0.00000 | 0.78958 | 0.00174 | 0.79132  | 0.00243  |
| C 15  | -0.11381 | 1.99915 | 4.09115 | 0.02350 | 6.11381  | 0.06194  |
| C 16  | -0.10603 | 1.99900 | 4.09058 | 0.01645 | 6.10603  | -0.03394 |
| C 17  | 0.29161  | 1.99888 | 3.69340 | 0.01611 | 5.70839  | -0.04599 |
| C 18  | -0.25439 | 1.99928 | 4.23821 | 0.01690 | 6.25439  | 0.06436  |
| H 19  | 0.21065  | 0.00000 | 0.78742 | 0.00193 | 0.78935  | 0.00122  |
| H 20  | 0.21983  | 0.00000 | 0.77877 | 0.00140 | 0.78017  | -0.00251 |
| C 21  | 0.10312  | 1.99932 | 3.87164 | 0.02593 | 5.89688  | -0.02956 |
| H 22  | 0.22406  | 0.00000 | 0.77421 | 0.00173 | 0.77594  | 0.00123  |
| N 23  | -0.47465 | 1.99934 | 5.43880 | 0.03651 | 7.47465  | 0.06687  |
| O 24  | -0.66879 | 1.99978 | 6.65022 | 0.01879 | 8.66879  | 0.02453  |
| O 25  | -0.64367 | 1.99977 | 6.62350 | 0.02041 | 8.64367  | 0.02090  |
| Cl 26 | -0.11838 | 9.99970 | 7.10431 | 0.01437 | 17.11838 | 0.11691  |
| C 27  | 0.38078  | 1.99937 | 3.58529 | 0.03456 | 5.61922  | -0.00291 |
| C 28  | -0.52085 | 1.99923 | 4.50474 | 0.01688 | 6.52085  | 0.00114  |
| H 29  | 0.21387  | 0.00000 | 0.78506 | 0.00107 | 0.78613  | -0.00013 |
| C 30  | 0.37304  | 1.99934 | 3.59337 | 0.03425 | 5.62696  | -0.00278 |
| H 31  | 0.13795  | 0.00000 | 0.85896 | 0.00309 | 0.86205  | 0.00287  |
| H 32  | 0.13006  | 0.00000 | 0.86666 | 0.00328 | 0.86994  | 0.00359  |

=====  
 \* Total \* 0.00000 83.97075 108.52680 0.50245 193.00000 1.00000

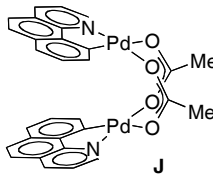

|    |               |               |               |
|----|---------------|---------------|---------------|
| H1 | -3.8063267603 | 0.6256319333  | 0.3658492198  |
| C2 | -2.7469451554 | 0.3710081486  | 0.3665470853  |
| H3 | -2.6097037673 | 0.3851381301  | -1.7826486334 |
| C4 | -2.0849879839 | 0.2364745545  | -0.8396046273 |
| C5 | -0.7465753485 | -0.1241831579 | 1.6284987226  |
| C6 | -0.7175907621 | -0.0973206485 | -0.8526629315 |
| C7 | -2.0895112431 | 0.2004596629  | 1.6027934392  |

---

|      |               |               |               |
|------|---------------|---------------|---------------|
| C8   | -0.0776659154 | -0.2788312402 | 0.3903563954  |
| C9   | 0.0634470637  | -0.2512515084 | -2.0459533962 |
| H10  | -2.6372603004 | 0.3284954336  | 2.5350251101  |
| C11  | 1.3847480138  | -0.5785613226 | -2.0021432620 |
| H12  | -0.4286030435 | -0.0975211365 | -3.0060860018 |
| H13  | 1.9595481881  | -0.6905079662 | -2.9203317344 |
| C14  | 2.0523046093  | -0.7834696311 | -0.7510724774 |
| C15  | 3.4055834398  | -1.1284986228 | -0.6023677512 |
| C16  | 1.2991359739  | -0.6198347175 | 0.4252598203  |
| C17  | 3.9362779693  | -1.2916497206 | 0.6621241381  |
| H18  | 4.0262821662  | -1.2622207059 | -1.4874290352 |
| H19  | 4.9787477830  | -1.5604859559 | 0.8044252535  |
| C20  | 3.1200433953  | -1.0959189467 | 1.7827013795  |
| H21  | 3.4933775109  | -1.1978354418 | 2.8000599150  |
| N22  | 1.8394928509  | -0.7696469254 | 1.6642649092  |
| Pd23 | 0.5097176667  | -0.2411433493 | 3.1543312636  |
| Pd24 | 1.1169578294  | 2.5659272558  | 3.3491437809  |
| H25  | 4.8892029546  | 2.2217941272  | -0.2290649913 |
| C26  | 3.8490716286  | 2.4596931557  | -0.0086547049 |
| H27  | 3.3516231863  | 2.7923202736  | -2.0774512135 |
| C28  | 2.9957314923  | 2.7797178279  | -1.0479682956 |
| C29  | 2.0974696711  | 2.7182234839  | 1.6358812264  |
| C30  | 1.6507605922  | 3.0935806083  | -0.7760300146 |
| C31  | 3.4118382753  | 2.4190889380  | 1.3317420828  |
| C32  | 1.2319600108  | 3.0625126486  | 0.5697278401  |
| C33  | 0.6821203440  | 3.4280073492  | -1.7798784202 |
| H34  | 4.1069106936  | 2.1486599287  | 2.1249855095  |
| C35  | -0.6084834866 | 3.7248052786  | -1.4618377949 |
| H36  | 1.0032711027  | 3.4385935756  | -2.8211868556 |
| H37  | -1.3284863926 | 3.9752882426  | -2.2395980930 |
| C38  | -1.0530611912 | 3.7144868970  | -0.0998234548 |
| C39  | -2.3577349411 | 4.0099523160  | 0.3283103409  |
| C40  | -0.1146643782 | 3.3736120297  | 0.8907196335  |
| C41  | -2.6658216871 | 3.9578126107  | 1.6735817232  |
| H42  | -3.1168937423 | 4.2755074822  | -0.4063571352 |
| H43  | -3.6661606940 | 4.1836558512  | 2.0308468392  |
| C44  | -1.6749453916 | 3.5955813196  | 2.5940575828  |
| H45  | -1.8706185372 | 3.5248733172  | 3.6624910223  |
| N46  | -0.4368579801 | 3.3120914740  | 2.2105835739  |
| C47  | -0.9295813263 | 1.3124808340  | 5.2278609849  |
| O48  | -0.1704679711 | 2.3047433300  | 5.0833068310  |
| O49  | -0.9561773826 | 0.2528023046  | 4.5279532600  |
| C50  | 2.8552157165  | 0.7043215811  | 4.8592215320  |
| O51  | 2.0711584925  | -0.2600101213 | 4.6679067978  |
| O52  | 2.7818247074  | 1.8698222862  | 4.3591807053  |
| C53  | -1.9265393289 | 1.3567413097  | 6.3596099259  |
| H54  | -2.1477208797 | 2.3885820113  | 6.6425632790  |
| H55  | -1.4925071082 | 0.8479107967  | 7.2274122644  |
| H56  | -2.8404286439 | 0.8225111622  | 6.0875858118  |

|     |              |               |              |
|-----|--------------|---------------|--------------|
| C57 | 4.0254875137 | 0.4838454541  | 5.7853523353 |
| H58 | 4.9241425173 | 0.9556382022  | 5.3776524194 |
| H59 | 4.1925944251 | -0.5813639994 | 5.9588396375 |
| H60 | 3.8117083921 | 0.9699997968  | 6.7433794739 |

|     |             |          |         |          |
|-----|-------------|----------|---------|----------|
| 369 | Pd 23 s     | Cor( 4s) | 1.99454 | -3.26926 |
| 370 | Pd 23 s     | Val( 5s) | 0.37485 | 0.49498  |
| 371 | Pd 23 s     | Ryd(11s) | 0.00135 | 19.24017 |
| 372 | Pd 23 s     | Ryd( 6s) | 0.00064 | 1.16953  |
| 373 | Pd 23 s     | Ryd( 7s) | 0.00023 | 3.61089  |
| 374 | Pd 23 s     | Ryd( 8s) | 0.00003 | 5.03776  |
| 375 | Pd 23 s     | Ryd( 9s) | 0.00000 | 9.30681  |
| 376 | Pd 23 s     | Ryd(10s) | 0.00000 | 15.77191 |
| 377 | Pd 23 px    | Cor( 4p) | 1.99619 | -2.05702 |
| 378 | Pd 23 px    | Ryd( 5p) | 0.00189 | 0.96745  |
| 379 | Pd 23 px    | Ryd( 7p) | 0.00026 | 2.63891  |
| 380 | Pd 23 px    | Ryd( 8p) | 0.00040 | 3.14140  |
| 381 | Pd 23 px    | Ryd( 6p) | 0.00023 | 0.99342  |
| 382 | Pd 23 px    | Ryd( 9p) | 0.00001 | 8.31134  |
| 383 | Pd 23 px    | Ryd(10p) | 0.00000 | 11.35530 |
| 384 | Pd 23 py    | Cor( 4p) | 1.99817 | -2.04509 |
| 385 | Pd 23 py    | Ryd( 6p) | 0.00286 | 1.27078  |
| 386 | Pd 23 py    | Ryd( 7p) | 0.00064 | 1.40969  |
| 387 | Pd 23 py    | Ryd( 8p) | 0.00024 | 2.98922  |
| 388 | Pd 23 py    | Ryd( 5p) | 0.00028 | 0.67712  |
| 389 | Pd 23 py    | Ryd( 9p) | 0.00000 | 9.18701  |
| 390 | Pd 23 py    | Ryd(10p) | 0.00000 | 11.42775 |
| 391 | Pd 23 pz    | Cor( 4p) | 1.99603 | -2.05850 |
| 392 | Pd 23 pz    | Ryd( 6p) | 0.00204 | 1.16464  |
| 393 | Pd 23 pz    | Ryd( 7p) | 0.00051 | 2.82633  |
| 394 | Pd 23 pz    | Ryd( 8p) | 0.00043 | 2.98284  |
| 395 | Pd 23 pz    | Ryd( 5p) | 0.00023 | 0.88804  |
| 396 | Pd 23 pz    | Ryd( 9p) | 0.00001 | 8.55857  |
| 397 | Pd 23 pz    | Ryd(10p) | 0.00000 | 11.37210 |
| 398 | Pd 23 dxy   | Val( 4d) | 1.94313 | -0.26932 |
| 399 | Pd 23 dxy   | Ryd( 6d) | 0.00203 | 1.06247  |
| 400 | Pd 23 dxy   | Ryd( 5d) | 0.00046 | 0.67268  |
| 401 | Pd 23 dxy   | Ryd( 7d) | 0.00002 | 2.81419  |
| 402 | Pd 23 dxz   | Val( 4d) | 1.18870 | -0.24939 |
| 403 | Pd 23 dxz   | Ryd( 6d) | 0.00070 | 1.99232  |
| 404 | Pd 23 dxz   | Ryd( 5d) | 0.00078 | 0.91073  |
| 405 | Pd 23 dxz   | Ryd( 7d) | 0.00006 | 2.61231  |
| 406 | Pd 23 dyz   | Val( 4d) | 1.91108 | -0.27051 |
| 407 | Pd 23 dyz   | Ryd( 6d) | 0.00221 | 1.07976  |
| 408 | Pd 23 dyz   | Ryd( 5d) | 0.00059 | 0.67373  |
| 409 | Pd 23 dyz   | Ryd( 7d) | 0.00002 | 2.84959  |
| 410 | Pd 23 dx2y2 | Val( 4d) | 1.94526 | -0.27025 |
| 411 | Pd 23 dx2y2 | Ryd( 6d) | 0.00320 | 1.42885  |
| 412 | Pd 23 dx2y2 | Ryd( 5d) | 0.00042 | 0.71562  |

---

|     |       |       |          |         |          |
|-----|-------|-------|----------|---------|----------|
| 413 | Pd 23 | dx2y2 | Ryd( 7d) | 0.00004 | 2.71078  |
| 414 | Pd 23 | dz2   | Val( 4d) | 1.95578 | -0.27828 |
| 415 | Pd 23 | dz2   | Ryd( 6d) | 0.00200 | 1.14580  |
| 416 | Pd 23 | dz2   | Ryd( 5d) | 0.00045 | 0.59202  |
| 417 | Pd 23 | dz2   | Ryd( 7d) | 0.00005 | 2.66425  |
| 418 | Pd 23 | f(0)  | Ryd( 4f) | 0.00024 | 1.69872  |
| 419 | Pd 23 | f(0)  | Ryd( 5f) | 0.00001 | 4.45925  |
| 420 | Pd 23 | f(c1) | Ryd( 4f) | 0.00075 | 1.89746  |
| 421 | Pd 23 | f(c1) | Ryd( 5f) | 0.00004 | 4.64713  |
| 422 | Pd 23 | f(s1) | Ryd( 4f) | 0.00015 | 1.63136  |
| 423 | Pd 23 | f(s1) | Ryd( 5f) | 0.00001 | 4.37642  |
| 424 | Pd 23 | f(c2) | Ryd( 4f) | 0.00062 | 1.86220  |
| 425 | Pd 23 | f(c2) | Ryd( 5f) | 0.00003 | 4.60488  |
| 426 | Pd 23 | f(s2) | Ryd( 4f) | 0.00040 | 1.69971  |
| 427 | Pd 23 | f(s2) | Ryd( 5f) | 0.00001 | 4.43817  |
| 428 | Pd 23 | f(c3) | Ryd( 4f) | 0.00013 | 1.68116  |
| 429 | Pd 23 | f(c3) | Ryd( 5f) | 0.00001 | 4.43412  |
| 430 | Pd 23 | f(s3) | Ryd( 4f) | 0.00016 | 1.67477  |
| 431 | Pd 23 | f(s3) | Ryd( 5f) | 0.00001 | 4.42670  |
| 432 | Pd 24 | s     | Cor( 4s) | 1.99456 | -3.27120 |
| 433 | Pd 24 | s     | Val( 5s) | 0.37523 | 0.49618  |
| 434 | Pd 24 | s     | Ryd(11s) | 0.00123 | 19.69992 |
| 435 | Pd 24 | s     | Ryd( 6s) | 0.00062 | 1.27028  |
| 436 | Pd 24 | s     | Ryd( 7s) | 0.00023 | 3.81059  |
| 437 | Pd 24 | s     | Ryd( 8s) | 0.00003 | 4.46343  |
| 438 | Pd 24 | s     | Ryd( 9s) | 0.00000 | 9.00409  |
| 439 | Pd 24 | s     | Ryd(10s) | 0.00000 | 13.00444 |
| 440 | Pd 24 | px    | Cor( 4p) | 1.99679 | -2.05801 |
| 441 | Pd 24 | px    | Ryd( 5p) | 0.00186 | 0.98775  |
| 442 | Pd 24 | px    | Ryd( 7p) | 0.00026 | 2.34979  |
| 443 | Pd 24 | px    | Ryd( 8p) | 0.00040 | 3.24550  |
| 444 | Pd 24 | px    | Ryd( 6p) | 0.00023 | 1.04073  |
| 445 | Pd 24 | px    | Ryd( 9p) | 0.00001 | 8.25795  |
| 446 | Pd 24 | px    | Ryd(10p) | 0.00000 | 11.34853 |
| 447 | Pd 24 | py    | Cor( 4p) | 1.99826 | -2.04816 |
| 448 | Pd 24 | py    | Ryd( 6p) | 0.00305 | 1.24377  |
| 449 | Pd 24 | py    | Ryd( 7p) | 0.00062 | 1.43910  |
| 450 | Pd 24 | py    | Ryd( 8p) | 0.00026 | 3.07612  |
| 451 | Pd 24 | py    | Ryd( 5p) | 0.00022 | 0.80372  |
| 452 | Pd 24 | py    | Ryd( 9p) | 0.00000 | 9.12578  |
| 453 | Pd 24 | py    | Ryd(10p) | 0.00000 | 11.41891 |
| 454 | Pd 24 | pz    | Cor( 4p) | 1.99533 | -2.05983 |
| 455 | Pd 24 | pz    | Ryd( 6p) | 0.00173 | 1.24208  |
| 456 | Pd 24 | pz    | Ryd( 7p) | 0.00049 | 2.77926  |
| 457 | Pd 24 | pz    | Ryd( 8p) | 0.00040 | 2.91509  |
| 458 | Pd 24 | pz    | Ryd( 5p) | 0.00025 | 0.85088  |
| 459 | Pd 24 | pz    | Ryd( 9p) | 0.00001 | 8.63927  |
| 460 | Pd 24 | pz    | Ryd(10p) | 0.00000 | 11.38144 |
| 461 | Pd 24 | dxy   | Val( 4d) | 1.86484 | -0.26756 |



|     |       |       |          |         |          |
|-----|-------|-------|----------|---------|----------|
| 462 | Pd 24 | dxy   | Ryd( 6d) | 0.00194 | 1.22360  |
| 463 | Pd 24 | dxy   | Ryd( 5d) | 0.00044 | 0.72806  |
| 464 | Pd 24 | dxy   | Ryd( 7d) | 0.00002 | 2.79843  |
| 465 | Pd 24 | dxz   | Val( 4d) | 1.36647 | -0.25658 |
| 466 | Pd 24 | dxz   | Ryd( 6d) | 0.00103 | 1.78588  |
| 467 | Pd 24 | dxz   | Ryd( 5d) | 0.00077 | 0.81259  |
| 468 | Pd 24 | dxz   | Ryd( 7d) | 0.00005 | 2.62984  |
| 469 | Pd 24 | dyz   | Val( 4d) | 1.93688 | -0.27317 |
| 470 | Pd 24 | dyz   | Ryd( 6d) | 0.00215 | 1.10891  |
| 471 | Pd 24 | dyz   | Ryd( 5d) | 0.00064 | 0.62227  |
| 472 | Pd 24 | dyz   | Ryd( 7d) | 0.00003 | 2.83845  |
| 473 | Pd 24 | dx2y2 | Val( 4d) | 1.94151 | -0.27137 |
| 474 | Pd 24 | dx2y2 | Ryd( 6d) | 0.00340 | 1.39274  |
| 475 | Pd 24 | dx2y2 | Ryd( 5d) | 0.00046 | 0.76083  |
| 476 | Pd 24 | dx2y2 | Ryd( 7d) | 0.00004 | 2.71116  |
| 477 | Pd 24 | dz2   | Val( 4d) | 1.83239 | -0.27577 |
| 478 | Pd 24 | dz2   | Ryd( 6d) | 0.00167 | 1.19687  |
| 479 | Pd 24 | dz2   | Ryd( 5d) | 0.00039 | 0.64421  |
| 480 | Pd 24 | dz2   | Ryd( 7d) | 0.00006 | 2.71660  |
| 481 | Pd 24 | f(0)  | Ryd( 4f) | 0.00037 | 1.72061  |
| 482 | Pd 24 | f(0)  | Ryd( 5f) | 0.00002 | 4.47584  |
| 483 | Pd 24 | f(c1) | Ryd( 4f) | 0.00062 | 1.86777  |
| 484 | Pd 24 | f(c1) | Ryd( 5f) | 0.00004 | 4.61440  |
| 485 | Pd 24 | f(s1) | Ryd( 4f) | 0.00016 | 1.66819  |
| 486 | Pd 24 | f(s1) | Ryd( 5f) | 0.00001 | 4.42268  |
| 487 | Pd 24 | f(c2) | Ryd( 4f) | 0.00044 | 1.77978  |
| 488 | Pd 24 | f(c2) | Ryd( 5f) | 0.00002 | 4.51829  |
| 489 | Pd 24 | f(s2) | Ryd( 4f) | 0.00044 | 1.72997  |
| 490 | Pd 24 | f(s2) | Ryd( 5f) | 0.00002 | 4.47030  |
| 491 | Pd 24 | f(c3) | Ryd( 4f) | 0.00013 | 1.66269  |
| 492 | Pd 24 | f(c3) | Ryd( 5f) | 0.00000 | 4.41520  |
| 493 | Pd 24 | f(s3) | Ryd( 4f) | 0.00027 | 1.70689  |
| 494 | Pd 24 | f(s3) | Ryd( 5f) | 0.00001 | 4.46044  |

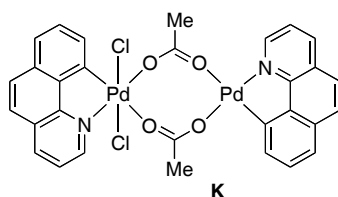

|    |              |               |               |
|----|--------------|---------------|---------------|
| H1 | 2.5736229028 | -4.8118259675 | -3.5034698038 |
| C2 | 2.8617932156 | -4.0537897425 | -2.7766889578 |
| H3 | 4.3959507616 | -5.2879006771 | -1.9076917075 |
| C4 | 3.8840262123 | -4.3269944550 | -1.8874525030 |
| C5 | 2.5299723432 | -1.8478010036 | -1.8626659557 |
| C6 | 4.2699873249 | -3.3531329701 | -0.9465279866 |
| C7 | 2.1761883231 | -2.8206246738 | -2.7752244774 |
| C8 | 3.5808980578 | -2.1234203508 | -0.9586567120 |
| C9 | 5.3128147091 | -3.5305878242 | 0.0228232557  |

---

|      |               |               |               |
|------|---------------|---------------|---------------|
| H10  | 1.3792898429  | -2.6352830575 | -3.4918891026 |
| C11  | 5.6395047814  | -2.5543869481 | 0.9148665217  |
| H12  | 5.8479587519  | -4.4796152471 | 0.0354918144  |
| H13  | 6.4319733356  | -2.7136461597 | 1.6444262000  |
| C14  | 4.9517929160  | -1.2973420395 | 0.9185096847  |
| C15  | 5.2048320269  | -0.2311274680 | 1.7984044583  |
| C16  | 3.9338560492  | -1.1102035701 | -0.0321700966 |
| C17  | 4.4629310685  | 0.9295301389  | 1.7022311869  |
| H18  | 5.9834042891  | -0.3313851913 | 2.5534057110  |
| H19  | 4.6347948462  | 1.7637545801  | 2.3757165094  |
| C20  | 3.4664823096  | 1.0337311041  | 0.7222261873  |
| H21  | 2.8450280659  | 1.9196662735  | 0.6103365965  |
| N22  | 3.2201199381  | 0.0418628788  | -0.1208973309 |
| Pd23 | 1.7546647515  | -0.0530603999 | -1.5913131513 |
| Pd24 | -1.7685735254 | 0.9635278613  | 0.0170520440  |
| H25  | -3.2456419028 | 5.0472514029  | 2.8738663502  |
| C26  | -3.2761786866 | 3.9697074212  | 2.7256052361  |
| H27  | -4.5221145434 | 3.6394445710  | 4.4429799175  |
| C28  | -3.9937573565 | 3.1847039163  | 3.6073046184  |
| C29  | -2.6299272167 | 2.0700835142  | 1.4649724772  |
| C30  | -4.0523007688 | 1.7887997335  | 3.4283411533  |
| C31  | -2.5747239119 | 3.4242150513  | 1.6256956968  |
| C32  | -3.3537397921 | 1.2451523125  | 2.3327794491  |
| C33  | -4.7712945389 | 0.8792803060  | 4.2739170275  |
| H34  | -2.0225002003 | 4.0501870539  | 0.9307659216  |
| C35  | -4.7893708391 | -0.4625524832 | 4.0384352567  |
| H36  | -5.3140595891 | 1.2887461849  | 5.1244573342  |
| H37  | -5.3423204131 | -1.1308375214 | 4.6958628243  |
| C38  | -4.0872279798 | -1.0291787999 | 2.9249541698  |
| C39  | -4.0369218491 | -2.3930155046 | 2.5864668433  |
| C40  | -3.3823641729 | -0.1479036093 | 2.0919648120  |
| C41  | -3.3202669730 | -2.8066470895 | 1.4807725143  |
| H42  | -4.5661160154 | -3.1176608789 | 3.2031524257  |
| H43  | -3.2682836915 | -3.8555493237 | 1.2060911137  |
| C44  | -2.6451951811 | -1.8638179819 | 0.6930642302  |
| H45  | -2.0627595149 | -2.1065590667 | -0.1939281520 |
| N46  | -2.6945725360 | -0.5821983236 | 1.0119618041  |
| C47  | -0.7954810167 | -0.4798979358 | -2.6728285449 |
| O48  | -1.0502263994 | -0.5946415825 | -1.4409615688 |
| O49  | 0.3716533143  | -0.3112722374 | -3.1340420742 |
| C50  | 0.1759868785  | 2.8640794016  | -1.2274386556 |
| O51  | 1.1120793507  | 2.0685178387  | -1.3143324484 |
| O52  | -1.0329147565 | 2.6597852089  | -0.8247695240 |
| C53  | -1.9215830894 | -0.5579028614 | -3.6648180647 |
| H54  | -2.5114306204 | 0.3627682948  | -3.5792259213 |
| H55  | -2.5937417148 | -1.3792104903 | -3.3987771560 |
| H56  | -1.5539493305 | -0.6714495300 | -4.6864881898 |
| C57  | 0.3821355450  | 4.3122336359  | -1.6201310172 |
| H58  | 0.2517593460  | 4.9519219716  | -0.7406078315 |

|      |               |              |               |
|------|---------------|--------------|---------------|
| H59  | -0.3738546938 | 4.6077503402 | -2.3533634413 |
| H60  | 1.3826095318  | 4.4488995902 | -2.0342002571 |
| Cl61 | 0.0688923566  | 0.6894447829 | 1.4865177047  |
| Cl62 | -3.7508966829 | 1.2797162514 | -1.2395465278 |

|     |             |          |         |          |
|-----|-------------|----------|---------|----------|
| 370 | Pd 23 s     | Cor( 4s) | 1.99498 | -3.26643 |
| 371 | Pd 23 s     | Val( 5s) | 0.35194 | 0.45442  |
| 372 | Pd 23 s     | Ryd(11s) | 0.00192 | 17.22471 |
| 373 | Pd 23 s     | Ryd( 6s) | 0.00057 | 0.93282  |
| 374 | Pd 23 s     | Ryd( 7s) | 0.00031 | 1.68963  |
| 375 | Pd 23 s     | Ryd( 8s) | 0.00003 | 4.76979  |
| 376 | Pd 23 s     | Ryd( 9s) | 0.00000 | 5.84133  |
| 377 | Pd 23 s     | Ryd(10s) | 0.00000 | 12.90624 |
| 378 | Pd 23 px    | Cor( 4p) | 1.99786 | -2.04467 |
| 379 | Pd 23 px    | Ryd( 5p) | 0.00125 | 1.09925  |
| 380 | Pd 23 px    | Ryd( 6p) | 0.00077 | 1.50082  |
| 381 | Pd 23 px    | Ryd( 7p) | 0.00026 | 1.81464  |
| 382 | Pd 23 px    | Ryd( 8p) | 0.00027 | 2.04329  |
| 383 | Pd 23 px    | Ryd( 9p) | 0.00001 | 8.83815  |
| 384 | Pd 23 px    | Ryd(10p) | 0.00000 | 11.29564 |
| 385 | Pd 23 py    | Cor( 4p) | 1.99370 | -2.05102 |
| 386 | Pd 23 py    | Ryd( 5p) | 0.00124 | 0.92196  |
| 387 | Pd 23 py    | Ryd( 8p) | 0.00035 | 2.36630  |
| 388 | Pd 23 py    | Ryd( 6p) | 0.00026 | 1.98602  |
| 389 | Pd 23 py    | Ryd( 7p) | 0.00023 | 2.27338  |
| 390 | Pd 23 py    | Ryd( 9p) | 0.00001 | 8.55673  |
| 391 | Pd 23 py    | Ryd(10p) | 0.00000 | 11.23625 |
| 392 | Pd 23 pz    | Cor( 4p) | 1.99806 | -2.04270 |
| 393 | Pd 23 pz    | Ryd( 5p) | 0.00116 | 0.84861  |
| 394 | Pd 23 pz    | Ryd( 6p) | 0.00066 | 1.26102  |
| 395 | Pd 23 pz    | Ryd( 7p) | 0.00032 | 1.79506  |
| 396 | Pd 23 pz    | Ryd( 8p) | 0.00016 | 1.80137  |
| 397 | Pd 23 pz    | Ryd( 9p) | 0.00001 | 8.83234  |
| 398 | Pd 23 pz    | Ryd(10p) | 0.00000 | 11.30409 |
| 399 | Pd 23 dxy   | Val( 4d) | 1.82216 | -0.26494 |
| 400 | Pd 23 dxy   | Ryd( 6d) | 0.00153 | 1.22529  |
| 401 | Pd 23 dxy   | Ryd( 5d) | 0.00066 | 0.70897  |
| 402 | Pd 23 dxy   | Ryd( 7d) | 0.00005 | 2.76186  |
| 403 | Pd 23 dxz   | Val( 4d) | 1.69148 | -0.24935 |
| 404 | Pd 23 dxz   | Ryd( 6d) | 0.00142 | 1.83980  |
| 405 | Pd 23 dxz   | Ryd( 5d) | 0.00056 | 0.85857  |
| 406 | Pd 23 dxz   | Ryd( 7d) | 0.00005 | 2.78504  |
| 407 | Pd 23 dyz   | Val( 4d) | 1.95703 | -0.26542 |
| 408 | Pd 23 dyz   | Ryd( 6d) | 0.00211 | 1.13265  |
| 409 | Pd 23 dyz   | Ryd( 5d) | 0.00058 | 0.55588  |
| 410 | Pd 23 dyz   | Ryd( 7d) | 0.00003 | 2.74221  |
| 411 | Pd 23 dx2y2 | Val( 4d) | 1.66443 | -0.25653 |
| 412 | Pd 23 dx2y2 | Ryd( 6d) | 0.00161 | 1.43299  |
| 413 | Pd 23 dx2y2 | Ryd( 5d) | 0.00059 | 0.76657  |

---

|     |             |          |         |          |
|-----|-------------|----------|---------|----------|
| 414 | Pd 23 dx2y2 | Ryd( 7d) | 0.00004 | 2.64181  |
| 415 | Pd 23 dz2   | Val( 4d) | 1.81633 | -0.25804 |
| 416 | Pd 23 dz2   | Ryd( 6d) | 0.00178 | 1.13099  |
| 417 | Pd 23 dz2   | Ryd( 5d) | 0.00060 | 0.61222  |
| 418 | Pd 23 dz2   | Ryd( 7d) | 0.00003 | 2.77401  |
| 419 | Pd 23 f(0)  | Ryd( 4f) | 0.00020 | 1.65394  |
| 420 | Pd 23 f(0)  | Ryd( 5f) | 0.00001 | 4.40860  |
| 421 | Pd 23 f(c1) | Ryd( 4f) | 0.00050 | 1.75377  |
| 422 | Pd 23 f(c1) | Ryd( 5f) | 0.00002 | 4.51493  |
| 423 | Pd 23 f(s1) | Ryd( 4f) | 0.00021 | 1.69531  |
| 424 | Pd 23 f(s1) | Ryd( 5f) | 0.00001 | 4.44833  |
| 425 | Pd 23 f(c2) | Ryd( 4f) | 0.00048 | 1.78482  |
| 426 | Pd 23 f(c2) | Ryd( 5f) | 0.00002 | 4.54141  |
| 427 | Pd 23 f(s2) | Ryd( 4f) | 0.00023 | 1.66715  |
| 428 | Pd 23 f(s2) | Ryd( 5f) | 0.00001 | 4.42214  |
| 429 | Pd 23 f(c3) | Ryd( 4f) | 0.00045 | 1.79000  |
| 430 | Pd 23 f(c3) | Ryd( 5f) | 0.00002 | 4.54725  |
| 431 | Pd 23 f(s3) | Ryd( 4f) | 0.00028 | 1.68631  |
| 432 | Pd 23 f(s3) | Ryd( 5f) | 0.00001 | 4.44614  |
| 433 | Pd 24 s     | Cor( 4s) | 1.99498 | -3.35872 |
| 434 | Pd 24 s     | Val( 5s) | 0.35108 | 0.59545  |
| 435 | Pd 24 s     | Ryd( 6s) | 0.00223 | 1.74936  |
| 436 | Pd 24 s     | Ryd(11s) | 0.00101 | 20.54162 |
| 437 | Pd 24 s     | Ryd( 7s) | 0.00030 | 2.58872  |
| 438 | Pd 24 s     | Ryd( 8s) | 0.00001 | 6.51534  |
| 439 | Pd 24 s     | Ryd(10s) | 0.00001 | 16.98517 |
| 440 | Pd 24 s     | Ryd( 9s) | 0.00000 | 15.57152 |
| 441 | Pd 24 px    | Cor( 4p) | 1.99822 | -2.15403 |
| 442 | Pd 24 px    | Ryd( 7p) | 0.01035 | 1.35052  |
| 443 | Pd 24 px    | Ryd( 5p) | 0.00307 | 0.86020  |
| 444 | Pd 24 px    | Ryd( 8p) | 0.00028 | 3.13230  |
| 445 | Pd 24 px    | Ryd( 6p) | 0.00019 | 1.24268  |
| 446 | Pd 24 px    | Ryd( 9p) | 0.00002 | 8.40800  |
| 447 | Pd 24 px    | Ryd(10p) | 0.00000 | 11.21116 |
| 448 | Pd 24 py    | Cor( 4p) | 1.99627 | -2.14736 |
| 449 | Pd 24 py    | Ryd( 7p) | 0.00139 | 2.01841  |
| 450 | Pd 24 py    | Ryd( 5p) | 0.00255 | 0.83610  |
| 451 | Pd 24 py    | Ryd( 8p) | 0.00054 | 3.29817  |
| 452 | Pd 24 py    | Ryd( 6p) | 0.00023 | 1.70965  |
| 453 | Pd 24 py    | Ryd( 9p) | 0.00001 | 7.60254  |
| 454 | Pd 24 py    | Ryd(10p) | 0.00000 | 11.10942 |
| 455 | Pd 24 pz    | Cor( 4p) | 1.99611 | -2.15063 |
| 456 | Pd 24 pz    | Ryd( 7p) | 0.00573 | 2.11470  |
| 457 | Pd 24 pz    | Ryd( 5p) | 0.00304 | 0.83303  |
| 458 | Pd 24 pz    | Ryd( 8p) | 0.00041 | 3.08621  |
| 459 | Pd 24 pz    | Ryd( 6p) | 0.00018 | 1.47303  |
| 460 | Pd 24 pz    | Ryd( 9p) | 0.00001 | 8.09936  |
| 461 | Pd 24 pz    | Ryd(10p) | 0.00000 | 11.18322 |
| 462 | Pd 24 dxy   | Val( 4d) | 1.72817 | -0.35043 |

|     |       |       |          |         |          |
|-----|-------|-------|----------|---------|----------|
| 463 | Pd 24 | dxy   | Ryd( 6d) | 0.00229 | 1.19311  |
| 464 | Pd 24 | dxy   | Ryd( 5d) | 0.00155 | 0.66119  |
| 465 | Pd 24 | dxy   | Ryd( 7d) | 0.00003 | 2.72946  |
| 466 | Pd 24 | dxz   | Val( 4d) | 1.60386 | -0.35863 |
| 467 | Pd 24 | dxz   | Ryd( 6d) | 0.00278 | 1.22874  |
| 468 | Pd 24 | dxz   | Ryd( 5d) | 0.00123 | 0.94649  |
| 469 | Pd 24 | dxz   | Ryd( 7d) | 0.00004 | 2.91832  |
| 470 | Pd 24 | dyz   | Val( 4d) | 1.60876 | -0.34751 |
| 471 | Pd 24 | dyz   | Ryd( 6d) | 0.00158 | 1.53739  |
| 472 | Pd 24 | dyz   | Ryd( 5d) | 0.00159 | 0.70246  |
| 473 | Pd 24 | dyz   | Ryd( 7d) | 0.00004 | 2.58547  |
| 474 | Pd 24 | dx2y2 | Val( 4d) | 1.77935 | -0.35506 |
| 475 | Pd 24 | dx2y2 | Ryd( 6d) | 0.00477 | 1.33612  |
| 476 | Pd 24 | dx2y2 | Ryd( 5d) | 0.00153 | 1.04432  |
| 477 | Pd 24 | dx2y2 | Ryd( 7d) | 0.00004 | 2.56784  |
| 478 | Pd 24 | dz2   | Val( 4d) | 1.93860 | -0.36018 |
| 479 | Pd 24 | dz2   | Ryd( 6d) | 0.00252 | 0.94638  |
| 480 | Pd 24 | dz2   | Ryd( 5d) | 0.00184 | 0.79324  |
| 481 | Pd 24 | dz2   | Ryd( 7d) | 0.00004 | 2.67268  |
| 482 | Pd 24 | f(0)  | Ryd( 4f) | 0.00066 | 1.54643  |
| 483 | Pd 24 | f(0)  | Ryd( 5f) | 0.00002 | 4.35042  |
| 484 | Pd 24 | f(c1) | Ryd( 4f) | 0.00072 | 1.61320  |
| 485 | Pd 24 | f(c1) | Ryd( 5f) | 0.00001 | 4.40005  |
| 486 | Pd 24 | f(s1) | Ryd( 4f) | 0.00054 | 1.58604  |
| 487 | Pd 24 | f(s1) | Ryd( 5f) | 0.00001 | 4.37474  |
| 488 | Pd 24 | f(c2) | Ryd( 4f) | 0.00116 | 1.60114  |
| 489 | Pd 24 | f(c2) | Ryd( 5f) | 0.00003 | 4.40107  |
| 490 | Pd 24 | f(s2) | Ryd( 4f) | 0.00108 | 1.75990  |
| 491 | Pd 24 | f(s2) | Ryd( 5f) | 0.00004 | 4.50006  |
| 492 | Pd 24 | f(c3) | Ryd( 4f) | 0.00087 | 1.59474  |
| 493 | Pd 24 | f(c3) | Ryd( 5f) | 0.00003 | 4.37971  |
| 494 | Pd 24 | f(s3) | Ryd( 4f) | 0.00039 | 1.55064  |
| 495 | Pd 24 | f(s3) | Ryd( 5f) | 0.00001 | 4.34486  |

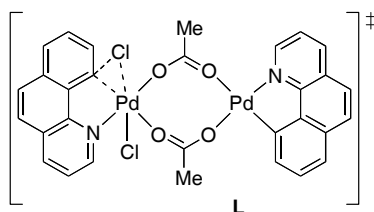

|    |              |               |               |
|----|--------------|---------------|---------------|
| H1 | 0.7864736960 | -4.9307311488 | -2.2843967115 |
| C2 | 1.2816022319 | -4.1244751058 | -1.7449161183 |
| H3 | 2.1572107231 | -5.4557859208 | -0.2967253508 |
| C4 | 2.0492223301 | -4.4260853573 | -0.6354365092 |
| C5 | 1.7414912634 | -1.7610246084 | -1.5368953030 |
| C6 | 2.7146818235 | -3.3943050410 | 0.0553360975  |
| C7 | 1.1223706057 | -2.7997949346 | -2.2062534000 |
| C8 | 2.5474021530 | -2.0759547290 | -0.4167962711 |
| C9 | 3.5502006143 | -3.6011475834 | 1.2036246290  |

---

|      |               |               |               |
|------|---------------|---------------|---------------|
| H10  | 0.5147480108  | -2.6009512364 | -3.0867493792 |
| C11  | 4.1774620383  | -2.5673367254 | 1.8296915769  |
| H12  | 3.6789207824  | -4.6190350919 | 1.5708559520  |
| H13  | 4.8079738280  | -2.7470240235 | 2.6990637433  |
| C14  | 4.0246644484  | -1.2206390494 | 1.3651742328  |
| C15  | 4.6265266213  | -0.0889672887 | 1.9417874097  |
| C16  | 3.2039179292  | -1.0058571998 | 0.2457062696  |
| C17  | 4.3953332653  | 1.1606300392  | 1.4031954759  |
| H18  | 5.2695460047  | -0.2080145322 | 2.8127528630  |
| H19  | 4.8446067393  | 2.0503174350  | 1.8337187822  |
| C20  | 3.5474648987  | 1.2862828398  | 0.2950452020  |
| H21  | 3.2971237164  | 2.2509436597  | -0.1412520602 |
| N22  | 2.9765545477  | 0.2309720702  | -0.2630828471 |
| Pd23 | 1.5433984718  | 0.1970156617  | -1.7720383223 |
| Pd24 | -1.2554254047 | 1.0253548730  | -0.0391476726 |
| H25  | -3.5077473829 | 4.4707976007  | 3.2499982731  |
| C26  | -3.3919513444 | 3.4308229256  | 2.9522583035  |
| H27  | -4.2623315813 | 2.6679560730  | 4.7641579423  |
| C28  | -3.8102568489 | 2.4255069363  | 3.8046152596  |
| C29  | -2.7327906830 | 1.8391202094  | 1.3215718347  |
| C30  | -3.6353752555 | 1.0765889582  | 3.4469611098  |
| C31  | -2.8619988567 | 3.1564798241  | 1.6790555451  |
| C32  | -3.0484097365 | 0.7863105251  | 2.1975402998  |
| C33  | -3.9944078144 | -0.0298012577 | 4.2871900074  |
| H34  | -2.6078196227 | 3.9469388521  | 0.9796141363  |
| C35  | -3.7338895623 | -1.3172136707 | 3.9330377242  |
| H36  | -4.4832007880 | 0.1874341586  | 5.2351726014  |
| H37  | -4.0161948114 | -2.1401394544 | 4.5867252630  |
| C38  | -3.0277572959 | -1.6202002342 | 2.7242266198  |
| C39  | -2.5812563177 | -2.8972209793 | 2.3443347462  |
| C40  | -2.6814064485 | -0.5466371400 | 1.8846838865  |
| C41  | -1.8119762815 | -3.0534288560 | 1.2078610193  |
| H42  | -2.8284307506 | -3.7556182197 | 2.9674302865  |
| H43  | -1.4393808558 | -4.0269224868 | 0.9027696873  |
| C44  | -1.4606231042 | -1.9303407044 | 0.4501665665  |
| H45  | -0.8249378034 | -1.9789571123 | -0.4329949175 |
| N46  | -1.8968296796 | -0.7274443974 | 0.7960563729  |
| C47  | -0.9164871805 | -0.2142513097 | -3.1590596958 |
| O48  | -1.4079230996 | -0.3420002633 | -2.0194130672 |
| O49  | 0.3114927975  | -0.0011254473 | -3.4182453445 |
| C50  | 0.3771560380  | 3.1511921449  | -1.3325385222 |
| O51  | 1.2710895799  | 2.3920987268  | -1.7360589034 |
| O52  | -0.7066933238 | 2.8614806313  | -0.7076640962 |
| C53  | -1.8337917076 | -0.3477282234 | -4.3506177026 |
| H54  | -2.6521839499 | 0.3720372150  | -4.2451989421 |
| H55  | -2.2835878863 | -1.3464100663 | -4.3470110282 |
| H56  | -1.3057663250 | -0.1840076127 | -5.2919710197 |
| C57  | 0.5048237158  | 4.6345584860  | -1.5951938103 |
| H58  | 0.3525064304  | 5.1940701163  | -0.6680288101 |

|      |               |              |               |
|------|---------------|--------------|---------------|
| H59  | -0.2779714041 | 4.9420780687 | -2.2957841330 |
| H60  | 1.4838307197  | 4.8598761138 | -2.0219007371 |
| Cl61 | 0.4978220860  | 0.9855510316 | 1.5551060007  |
| Cl62 | -3.5574198120 | 1.5393223639 | -0.7200407619 |

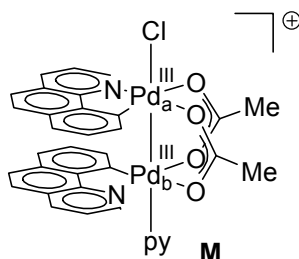

|     |               |               |               |
|-----|---------------|---------------|---------------|
| Pd1 | -0.3594325980 | 0.8476616597  | -1.0073683335 |
| Pd2 | -0.4431053563 | -1.7738096849 | -0.8405163145 |
| Cl3 | -0.6250552234 | -4.1356220683 | -0.9088859841 |
| C4  | -2.7578084553 | -0.3776362982 | -2.1551188944 |
| O5  | 0.1927222598  | -1.7495132879 | -2.7909412485 |
| C6  | 0.7632121785  | -0.7251700684 | -3.2899034165 |
| N7  | 1.1873243779  | 1.0469866409  | 0.3664025636  |
| N8  | -0.9348299545 | -1.8574915685 | 1.1477288088  |
| C9  | -1.4820208937 | 1.2324819137  | 0.6112198899  |
| C10 | -2.8430430262 | 1.4190466908  | 0.6932244853  |
| H11 | -3.4797279994 | 1.3430277050  | -0.1852748080 |
| C12 | -3.4092799876 | 1.7374806047  | 1.9485008307  |
| H13 | -4.4855770056 | 1.8837971562  | 2.0130179928  |
| C14 | -2.6372992506 | 1.8714040548  | 3.0856831663  |
| H15 | -3.0996712841 | 2.1175479781  | 4.0397279340  |
| C16 | -1.2394186900 | 1.7136119269  | 3.0136451597  |
| C17 | -0.6806715484 | 1.4003193388  | 1.7577812733  |
| C18 | 0.7269719246  | 1.3005978988  | 1.6188144105  |
| C19 | 1.5920275678  | 1.4872217829  | 2.7095795642  |
| C20 | 2.9716383243  | 1.4048975838  | 2.4507266861  |
| H21 | 3.6799736299  | 1.5348245791  | 3.2672158006  |
| C22 | 3.4187412520  | 1.1697190884  | 1.1649542035  |
| H23 | 4.4791062982  | 1.1072070741  | 0.9405147229  |
| C24 | 2.4907388432  | 0.9950163555  | 0.1309151042  |
| H25 | 2.7882556714  | 0.7922282339  | -0.8965286540 |
| C26 | 1.4182172587  | -2.0748907586 | -0.1239947513 |
| C27 | 2.5813099668  | -2.2896117218 | -0.8178046726 |
| H28 | 2.5922922963  | -2.3714072931 | -1.9018456332 |
| C29 | 3.7744824649  | -2.4404277673 | -0.0742407277 |
| H30 | 4.7036946951  | -2.6073218959 | -0.6150855821 |
| C31 | 3.7905750436  | -2.4054878718 | 1.3072359278  |
| H32 | 4.7242854920  | -2.5430715286 | 1.8490332945  |
| C33 | 2.5882103846  | -2.2457112657 | 2.0255179290  |
| C34 | 1.4038242599  | -2.0824914872 | 1.2797294874  |
| C35 | 0.1572369162  | -1.9848706808 | 1.9421201252  |
| C36 | 0.0546662918  | -2.0568684941 | 3.3398861150  |
| C37 | -1.2410506014 | -2.0147548761 | 3.8845911476  |
| H38 | -1.3718660447 | -2.0723068279 | 4.9638219627  |
| C39 | -2.3386832477 | -1.9210865329 | 3.0503089736  |
| H40 | -3.3481695340 | -1.9053802842 | 3.4490706171  |
| C41 | -2.1548368771 | -1.8475992714 | 1.6641561094  |
| H42 | -2.9790765239 | -1.7752954537 | 0.9574223476  |
| C43 | 1.2722162586  | -2.1874450932 | 4.0847983401  |
| H44 | 1.2112589571  | -2.2361568984 | 5.1702189411  |
| C45 | 2.4780876275  | -2.2743927283 | 3.4559059008  |
| H46 | 3.3886257792  | -2.3950020408 | 4.0405145168  |
| C47 | -0.3483356936 | 1.8694590116  | 4.1282314903  |

|     |               |               |               |
|-----|---------------|---------------|---------------|
| H48 | -0.7770873137 | 2.0953695421  | 5.1032157676  |
| C49 | 1.0018518698  | 1.7585754415  | 3.9871682511  |
| H50 | 1.6600791970  | 1.8914477318  | 4.8435821116  |
| O51 | -2.5163394916 | -1.4101833758 | -1.4919120684 |
| O52 | 0.9339871269  | 0.3770577529  | -2.7058679580 |
| O53 | -2.0182475500 | 0.6697023220  | -2.2036758851 |
| C54 | -4.0297022053 | -0.3136208207 | -2.9494763144 |
| H55 | -4.0623852659 | -1.1573502852 | -3.6446247555 |
| H56 | -4.8780441067 | -0.4299658380 | -2.2662422877 |
| C57 | 1.2838112695  | -0.8853922065 | -4.6873969074 |
| H58 | 0.8178350852  | -0.1339293584 | -5.3320169894 |
| H59 | 2.3621157034  | -0.6945415439 | -4.6920212157 |
| C60 | 0.6332761636  | 5.7615230371  | -1.9080852874 |
| C61 | -0.2727471522 | 5.4386387469  | -0.9051537784 |
| C62 | -0.6083090134 | 4.1059217551  | -0.7173089600 |
| N63 | -0.0918154299 | 3.1267094794  | -1.4669846452 |
| C64 | 0.7791049658  | 3.4344581397  | -2.4360825921 |
| C65 | 1.1656626012  | 4.7432813991  | -2.6893863778 |
| H66 | 0.9208380959  | 6.7958740517  | -2.0787339913 |
| H67 | -0.7141663163 | 6.2036136937  | -0.2730497732 |
| H68 | -1.3133806928 | 3.8042150949  | 0.0575984468  |
| H69 | 1.1659114098  | 2.5944520663  | -3.0121747124 |
| H70 | 1.8739588423  | 4.9539199724  | -3.4852467995 |
| H71 | 1.0815340147  | -1.8851744354 | -5.0733773705 |
| H72 | -4.1180997019 | 0.6281385426  | -3.4927747054 |

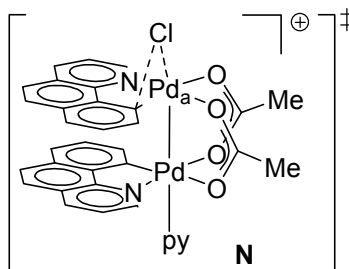

|     |               |               |               |
|-----|---------------|---------------|---------------|
| Pd1 | -0.2863625554 | 0.8376964598  | -0.9899940688 |
| Pd2 | -0.6559480192 | -1.7886485631 | -0.8636328500 |
| Cl3 | -0.2709543440 | -4.2069726519 | -0.7257445898 |
| C4  | -2.8080203095 | -0.0599682644 | -2.1902658588 |
| O5  | 0.0205572998  | -1.7947115515 | -2.7932437303 |
| C6  | 0.7451103564  | -0.8485245546 | -3.2463013936 |
| N7  | 1.2797179292  | 0.8309841606  | 0.3960583679  |
| N8  | -1.2271807031 | -1.8424295613 | 1.1095562980  |
| C9  | -1.3469783551 | 1.3899442108  | 0.6127671328  |
| C10 | -2.6754045043 | 1.7452186752  | 0.6877164635  |
| H11 | -3.3210543796 | 1.6995861745  | -0.1866445743 |
| C12 | -3.1899623411 | 2.2063838239  | 1.9196442591  |
| H13 | -4.2399281033 | 2.4869844902  | 1.9753695017  |
| C14 | -2.3965495239 | 2.3217260116  | 3.0443199312  |
| H15 | -2.8159068596 | 2.6895984753  | 3.9791125682  |
| C16 | -1.0293453259 | 1.9894101644  | 2.9821263779  |
| C17 | -0.5234215425 | 1.5222703098  | 1.7505765206  |
| C18 | 0.8606699732  | 1.2344379239  | 1.6243333698  |
| C19 | 1.7492029948  | 1.4006477109  | 2.7001829258  |
| C20 | 3.1097305279  | 1.1467352038  | 2.4502780581  |
| H21 | 3.8347215652  | 1.2707958372  | 3.2532525135  |
| C22 | 3.5173148311  | 0.7570434856  | 1.1897177436  |
| H23 | 4.5632740750  | 0.5623266410  | 0.9726003083  |
| C24 | 2.5668156246  | 0.6059493593  | 0.1713516983  |
| H25 | 2.8312451671  | 0.2916951502  | -0.8372123461 |
| C26 | 1.0948056466  | -2.7347315554 | -0.0608871125 |



|     |               |               |               |
|-----|---------------|---------------|---------------|
| C27 | 2.3141701196  | -2.8973253237 | -0.6974428507 |
| H28 | 2.3495997431  | -3.1410986070 | -1.7564957656 |
| C29 | 3.4878816634  | -2.8374844171 | 0.0686036855  |
| H30 | 4.4425950058  | -2.9787582100 | -0.4334831303 |
| C31 | 3.4566637851  | -2.6677325946 | 1.4427991551  |
| H32 | 4.3767206967  | -2.6867513683 | 2.0228035511  |
| C33 | 2.2273021598  | -2.4772351041 | 2.1014834064  |
| C34 | 1.0461733761  | -2.4632896199 | 1.3292600918  |
| C35 | -0.1817390111 | -2.1017252721 | 1.9386259540  |
| C36 | -0.2891793471 | -1.9316665561 | 3.3305964858  |
| C37 | -1.5564641885 | -1.5991643708 | 3.8390107985  |
| H38 | -1.6843552769 | -1.4696671807 | 4.9125298928  |
| C39 | -2.6239611418 | -1.4269418454 | 2.9792231607  |
| H40 | -3.6121553292 | -1.1751334003 | 3.3511846312  |
| C41 | -2.4204565668 | -1.5287628261 | 1.5985246238  |
| H42 | -3.2024622118 | -1.3367340880 | 0.8671276445  |
| C43 | 0.9064613153  | -2.0448553465 | 4.1111656329  |
| H44 | 0.8368089804  | -1.9073806290 | 5.1885312861  |
| C45 | 2.1096495504  | -2.2706352185 | 3.5166289241  |
| H46 | 3.0179982740  | -2.3074873838 | 4.1160551304  |
| C47 | -0.1181188820 | 2.1221038785  | 4.0826614780  |
| H48 | -0.5092393130 | 2.4749962185  | 5.0357420626  |
| C49 | 1.2081291581  | 1.8419096472  | 3.9514962965  |
| H50 | 1.8857567149  | 1.9671818071  | 4.7940079367  |
| O51 | -2.7196415748 | -1.1225942789 | -1.5410689085 |
| O52 | 1.0110682972  | 0.2215532691  | -2.6420424494 |
| O53 | -1.9389725021 | 0.8813978129  | -2.2191107257 |
| C54 | -4.0521544218 | 0.1879314905  | -3.0002991902 |
| H55 | -4.2308495186 | -0.6678663747 | -3.6568303863 |
| H56 | -4.9072567304 | 0.2535804375  | -2.3185487644 |
| C57 | 1.0821472538  | 5.6744153894  | -2.0518503450 |
| C58 | 1.3259627808  | -1.0627154426 | -4.6127079271 |
| H59 | 0.9394316755  | -0.2935894306 | -5.2888039386 |
| N60 | 0.2360371142  | 3.1013478371  | -1.4777110571 |
| C61 | 0.0474744711  | 5.4578989883  | -1.1498807308 |
| H62 | 2.4122886288  | -0.9352148985 | -4.5645482080 |
| C63 | -0.3437975454 | 4.1520882443  | -0.8901986488 |
| C64 | 1.2300975565  | 3.3074163975  | -2.3491874966 |
| C65 | 1.6836245708  | 4.5811801421  | -2.6637950744 |
| H66 | 1.4148028055  | 6.6847727674  | -2.2766765211 |
| H67 | -0.4516683672 | 6.2842983429  | -0.6520502329 |
| H68 | -1.1493177764 | 3.9320880550  | -0.1887398697 |
| H69 | 1.6557526702  | 2.4134102492  | -2.8049031035 |
| H70 | 2.4926083605  | 4.7087270929  | -3.3772083625 |
| H71 | 1.0813374259  | -2.0525292955 | -5.0003973108 |
| H72 | -3.9780038685 | 1.1062080355  | -3.5839979579 |

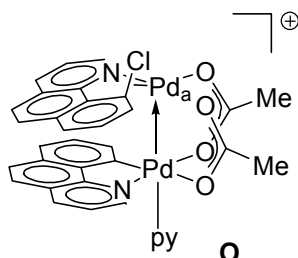

|     |               |               |               |
|-----|---------------|---------------|---------------|
| Pd1 | -0.4181409152 | 0.8655587473  | -1.0108246664 |
| C2  | -2.8390863793 | -0.0689431234 | -2.3776918770 |
| O3  | 0.1246232672  | -1.7862465205 | -2.7110753950 |
| C4  | 0.8053748696  | -0.8115842940 | -3.1686600197 |
| N5  | 1.0379541793  | 0.8092113671  | 0.5003459850  |

|      |               |               |               |
|------|---------------|---------------|---------------|
| C6   | -1.5823134611 | 1.4432036132  | 0.5003047294  |
| C7   | -2.9066294366 | 1.8257705441  | 0.4728740636  |
| H8   | -3.4877338255 | 1.7603651426  | -0.4445050676 |
| C9   | -3.4967543612 | 2.3397576761  | 1.6477103420  |
| H10  | -4.5423589617 | 2.6407052627  | 1.6207116522  |
| C11  | -2.7812237717 | 2.4817180578  | 2.8212053425  |
| H12  | -3.2555740147 | 2.8915255081  | 3.7113174901  |
| C13  | -1.4219041691 | 2.1171673698  | 2.8665211045  |
| C14  | -0.8404954703 | 1.5974099106  | 1.6911989397  |
| C15  | 0.5405834576  | 1.2632054358  | 1.6799018430  |
| C16  | 1.3467126524  | 1.4192672970  | 2.8217400160  |
| C17  | 2.7023202770  | 1.0673691640  | 2.7001802811  |
| H18  | 3.3618475979  | 1.1667919296  | 3.5616197175  |
| C19  | 3.1890291465  | 0.6057123210  | 1.4920618313  |
| H20  | 4.2327073178  | 0.3294341250  | 1.3756248978  |
| C21  | 2.3224922892  | 0.4921717670  | 0.3977171135  |
| H22  | 2.6526590074  | 0.1449099578  | -0.5799449455 |
| C23  | -0.5905097430 | 2.2619409766  | 4.0275901335  |
| H24  | -1.0390979418 | 2.6633457002  | 4.9348135151  |
| C25  | 0.7294867797  | 1.9281448721  | 4.0106484490  |
| H26  | 1.3439887218  | 2.0543202243  | 4.9005871969  |
| O27  | -2.7883133364 | -1.1254697881 | -1.7257958586 |
| O28  | 0.9920289010  | 0.2828330774  | -2.5777578630 |
| O29  | -1.9813124844 | 0.8882634757  | -2.3511953233 |
| C30  | -4.0291663513 | 0.1855319654  | -3.2697886586 |
| H31  | -4.2830487682 | -0.7282243197 | -3.8121574220 |
| H32  | -4.8875651613 | 0.4379003893  | -2.6360740172 |
| C33  | 1.0557033839  | 5.7337510678  | -1.9744468089 |
| C34  | 1.4096121576  | -1.0071812920 | -4.5264965174 |
| H35  | 0.8036627613  | -0.4598677500 | -5.2564789870 |
| N36  | 0.1485179556  | 3.1645964257  | -1.4661811800 |
| C37  | -0.0448611677 | 5.5248455642  | -1.1523285244 |
| H38  | 2.4160457559  | -0.5813221023 | -4.5497607650 |
| C39  | -0.4632784007 | 4.2213508619  | -0.9246442794 |
| C40  | 1.2060746557  | 3.3651336275  | -2.2601821709 |
| C41  | 1.6924743541  | 4.6354303724  | -2.5396550087 |
| H42  | 1.4116406549  | 6.7415880081  | -2.1739337562 |
| H43  | -0.5739226525 | 6.3548472548  | -0.6926344626 |
| H44  | -1.3206178603 | 4.0086769878  | -0.2850680274 |
| H45  | 1.6576241117  | 2.4678572762  | -2.6836095127 |
| H46  | 2.5534216284  | 4.7567332923  | -3.1907754597 |
| Pd47 | -0.6199551460 | -1.7691487578 | -0.8222110199 |
| H48  | 4.6244870446  | -3.6621896851 | 1.9362575983  |
| C49  | 3.5806199415  | -3.3661667966 | 1.9924825722  |
| H50  | 3.7310309830  | -2.5289876056 | 3.9595100822  |
| C51  | 3.0879642650  | -2.7296430647 | 3.1046921106  |
| C52  | 1.3858402600  | -3.3176692527 | 1.0120806295  |
| C53  | 1.7338440792  | -2.3479935979 | 3.1836193875  |
| C54  | 2.7077444728  | -3.6973598215 | 0.9484729886  |
| C55  | 0.8519754237  | -2.5566785391 | 2.0832312059  |
| C56  | 1.2434269521  | -1.8046485834 | 4.4103240349  |
| H57  | 3.0526437107  | -4.2850380243 | 0.1022721819  |
| C58  | -0.0694335578 | -1.5215409810 | 4.5709580928  |
| H59  | 1.9482526658  | -1.6780139862 | 5.2300583389  |
| H60  | -0.4613039557 | -1.1722890992 | 5.5241097538  |
| C61  | -0.9660382726 | -1.6229002493 | 3.4671965246  |
| C62  | -2.3192163006 | -1.2659655625 | 3.6128338332  |
| C63  | -0.4971429771 | -2.0331701906 | 2.1941799245  |
| C64  | -3.1585749262 | -1.2850239598 | 2.5276569169  |
| H65  | -2.6781890823 | -0.9700985444 | 4.5973294000  |
| H66  | -4.2094348234 | -1.0262532748 | 2.6070920113  |
| C67  | -2.6028698708 | -1.5472045941 | 1.2732199766  |

|      |               |               |               |
|------|---------------|---------------|---------------|
| H68  | -3.1752819002 | -1.4410274192 | 0.3529649299  |
| N69  | -1.3229464495 | -1.8806354845 | 1.1156745574  |
| Cl70 | 0.3595416914  | -3.9965791578 | -0.2560769446 |
| H71  | -3.8472746792 | 1.0084715831  | -3.9622468412 |
| H72  | 1.4307603784  | -2.0619811303 | -4.8040256913 |

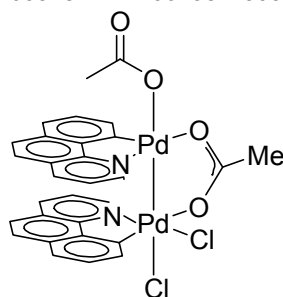**S1A**

|     |               |              |               |
|-----|---------------|--------------|---------------|
| Pd1 | 6.6432377215  | 3.8544951500 | 5.9499216797  |
| Pd2 | 6.4461937303  | 1.1824033252 | 5.9928543079  |
| O3  | 7.0872848286  | 6.0612768944 | 5.3214628220  |
| O4  | 4.9747639351  | 3.7927262853 | 4.7687251050  |
| O5  | 4.3730651989  | 1.7140129563 | 5.4240194116  |
| C6  | 4.2160374898  | 2.7640822095 | 4.7601897921  |
| C7  | 3.0277686997  | 2.8602483689 | 3.8446277385  |
| H8  | 3.3036671240  | 2.3869453261 | 2.8955226186  |
| H9  | 2.7570736078  | 3.9000576194 | 3.6509633100  |
| H10 | 2.1862264313  | 2.3034389054 | 4.2638318478  |
| N11 | 8.2028751557  | 3.9179600127 | 7.3022403247  |
| N12 | 6.0110643622  | 0.9836028003 | 8.0342733934  |
| C13 | 5.5403746124  | 4.0001860503 | 7.6203750188  |
| C14 | 4.1811490506  | 4.1709686659 | 7.7575738149  |
| H15 | 3.5228418828  | 4.1563344419 | 6.8932522432  |
| C16 | 3.6440919442  | 4.3824969152 | 9.0451740761  |
| H17 | 2.5684608940  | 4.5163815058 | 9.1457834738  |
| C18 | 4.4400450854  | 4.4212374193 | 10.1735242454 |
| H19 | 3.9996581559  | 4.5777141951 | 11.1569962107 |
| C20 | 5.8360321806  | 4.2849194708 | 10.0536268731 |
| C21 | 6.3648975306  | 4.0935832424 | 8.7604212891  |
| C22 | 7.7703208376  | 4.0315564239 | 8.5824277140  |
| C23 | 8.6607721907  | 4.1118556975 | 9.6655687365  |
| C24 | 10.0334288916 | 4.0479662802 | 9.3679014500  |
| H25 | 10.7601401094 | 4.0931033686 | 10.1777906048 |
| C26 | 10.4496533129 | 3.9337890233 | 8.0563645120  |
| H27 | 11.5039912267 | 3.8809076254 | 7.8025027921  |
| C28 | 9.4976144370  | 3.8769108463 | 7.0293660480  |
| H29 | 9.7560251969  | 3.7959509466 | 5.9741888056  |
| C30 | 8.3175139877  | 0.8111133651 | 6.6371732630  |
| C31 | 9.4703110974  | 0.6851630281 | 5.9013214796  |
| H32 | 9.4488628076  | 0.7668935444 | 4.8178943647  |
| C33 | 10.6804887541 | 0.4472906811 | 6.5875165207  |
| H34 | 11.5946461823 | 0.3500044602 | 6.0048744396  |
| C35 | 10.7333727855 | 0.3267976332 | 7.9621923829  |
| H36 | 11.6788466302 | 0.1332085943 | 8.4653883768  |
| C37 | 9.5529228450  | 0.4253840224 | 8.7225450239  |
| C38 | 8.3449556588  | 0.6701394961 | 8.0359807386  |
| C39 | 7.1277355984  | 0.7473388221 | 8.7615222597  |
| C40 | 7.0845442172  | 0.5685696499 | 10.1544435430 |
| C41 | 5.8175405673  | 0.6164520003 | 10.7617399908 |
| H42 | 5.7355864598  | 0.4862671716 | 11.8398678384 |
| C43 | 4.6890666957  | 0.8150147330 | 9.9909068448  |
| H44 | 3.7000187524  | 0.8445104662 | 10.4379314761 |

|      |               |               |               |
|------|---------------|---------------|---------------|
| C45  | 4.8196675776  | 0.9954910668  | 8.6072849961  |
| H46  | 3.9715723811  | 1.1670108779  | 7.9470099237  |
| C47  | 7.8744260777  | 5.6093051049  | 4.4430877485  |
| C48  | 8.5539992239  | 6.5670617284  | 3.5046988399  |
| H49  | 7.8609434110  | 6.8116775383  | 2.6925483130  |
| H50  | 9.4476782473  | 6.1128497424  | 3.0701535583  |
| H51  | 8.8036862046  | 7.4973599730  | 4.0219234646  |
| O52  | 8.0924591048  | 4.3640551701  | 4.3197547830  |
| C53  | 8.3250246930  | 0.3468345693  | 10.8352514443 |
| H54  | 8.3073018757  | 0.2199241377  | 11.9163553321 |
| C55  | 9.4995069762  | 0.2817261898  | 10.1487907177 |
| H56  | 10.4325199223 | 0.1004344679  | 10.6809534259 |
| C57  | 6.7525730346  | 4.3475629647  | 11.1558129256 |
| H58  | 6.3444483638  | 4.4804496118  | 12.1569575246 |
| C59  | 8.0997017632  | 4.2575752527  | 10.9753520162 |
| H60  | 8.7777442402  | 4.3112560008  | 11.8249078567 |
| Cl61 | 7.0763636773  | 1.3561411582  | 3.7714354650  |
| Cl62 | 6.1578990546  | -1.1860758816 | 5.8398853946  |

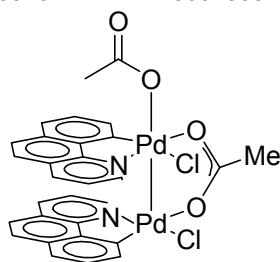**S1B**

|     |               |              |              |
|-----|---------------|--------------|--------------|
| Pd1 | 6.9491106143  | 3.6865369255 | 4.2801261877 |
| Pd2 | 6.7728043715  | 0.9765360774 | 4.5559032387 |
| O3  | 6.6506601817  | 5.6575594771 | 3.8552016927 |
| O4  | 5.3537704666  | 3.4710530997 | 3.0208763870 |
| O5  | 4.7273834418  | 1.5011670583 | 3.9385249257 |
| C6  | 4.5986013159  | 2.4438345197 | 3.1246622547 |
| C7  | 3.4593010326  | 2.4100534167 | 2.1467802251 |
| H8  | 3.7846532752  | 1.8075283026 | 1.2908769003 |
| H9  | 3.2044495953  | 3.4108011778 | 1.7931243713 |
| H10 | 2.5959485950  | 1.9170359404 | 2.6004784623 |
| N11 | 8.4302974465  | 3.8559463853 | 5.7208624749 |
| N12 | 6.3616051333  | 1.0583395417 | 6.6174891192 |
| C13 | 5.7421763609  | 4.0694558279 | 5.8848853078 |
| C14 | 4.3879093110  | 4.2915623502 | 5.9127426816 |
| H15 | 3.7870248253  | 4.2255905667 | 5.0090244259 |
| C16 | 3.7845205397  | 4.6246268827 | 7.1449039405 |
| H17 | 2.7088748303  | 4.7893435084 | 7.1742094849 |
| C18 | 4.5231749311  | 4.7542909275 | 8.3050568539 |
| H19 | 4.0360516624  | 5.0167228122 | 9.2430975223 |
| C20 | 5.9203698045  | 4.5795088678 | 8.2789320857 |
| C21 | 6.5144044632  | 4.2460311725 | 7.0441537658 |
| C22 | 7.9236673569  | 4.1154699193 | 6.9509690899 |
| C23 | 8.7516077966  | 4.2872990449 | 8.0705487398 |
| C24 | 10.1373571261 | 4.1694408446 | 7.8657760582 |
| H25 | 10.8152715297 | 4.2900556570 | 8.7096797591 |
| C26 | 10.6246961518 | 3.9153453577 | 6.6014256221 |
| H27 | 11.6903863892 | 3.8268552905 | 6.4135615623 |
| C28 | 9.7366860389  | 3.7757899945 | 5.5266081668 |
| H29 | 10.0506085014 | 3.6088652221 | 4.4956516925 |
| C30 | 8.6284384014  | 0.6388358016 | 5.2200958034 |
| C31 | 9.7909157697  | 0.4660026350 | 4.5008030998 |

|      |               |              |               |
|------|---------------|--------------|---------------|
| H32  | 9.7694465029  | 0.4759246249 | 3.4136997653  |
| C33  | 11.0059695785 | 0.2906153487 | 5.1955700507  |
| H34  | 11.9182102719 | 0.1488708983 | 4.6191272481  |
| C35  | 11.0685102929 | 0.2946865618 | 6.5762984970  |
| H36  | 12.0188621229 | 0.1536273295 | 7.0881427304  |
| C37  | 9.8950095342  | 0.4763811332 | 7.3324862923  |
| C38  | 8.6821943597  | 0.6526374156 | 6.6310751276  |
| C39  | 7.4805079311  | 0.8603729816 | 7.3593113062  |
| C40  | 7.4549337466  | 0.8516017250 | 8.7654323587  |
| C41  | 6.2018784779  | 1.0196119361 | 9.3803627427  |
| H42  | 6.1356150228  | 1.0194011216 | 10.4675604882 |
| C43  | 5.0684244445  | 1.1766466883 | 8.6067536933  |
| H44  | 4.0903133594  | 1.3057373895 | 9.0603010061  |
| C45  | 5.1852251226  | 1.1998181072 | 7.2108686001  |
| H46  | 4.3322068315  | 1.3572857157 | 6.5535023630  |
| C47  | 7.4607254743  | 6.5838801234 | 4.3003684610  |
| C48  | 7.1381780324  | 7.8964276548 | 3.5973640007  |
| H49  | 7.6751886952  | 7.9035486027 | 2.6438740446  |
| H50  | 7.4955787317  | 8.7169651849 | 4.2235923218  |
| H51  | 6.0714581308  | 7.9976415183 | 3.3894907016  |
| O52  | 8.3504221328  | 6.4884895299 | 5.1205519220  |
| C53  | 8.6960419167  | 0.6657271314 | 9.4550768515  |
| H54  | 8.6895747836  | 0.6611910492 | 10.5438226300 |
| C55  | 9.8582892251  | 0.4920142313 | 8.7663077321  |
| H56  | 10.7944468392 | 0.3496912763 | 9.3052136132  |
| C57  | 6.7749461938  | 4.7280614184 | 9.4211687934  |
| H58  | 6.3180973115  | 4.9717152730 | 10.3795835704 |
| C59  | 8.1253656676  | 4.5836460327 | 9.3240339253  |
| H60  | 8.7600813035  | 4.7063901026 | 10.1998018315 |
| Cl61 | 8.6236948806  | 3.5904624838 | 2.4950487958  |
| Cl62 | 7.2334446634  | 0.3627060069 | 2.3853978205  |

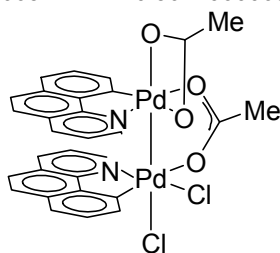**S1C**

|     |              |              |               |
|-----|--------------|--------------|---------------|
| Pd1 | 6.6964164182 | 3.6445183184 | 5.7695658890  |
| Pd2 | 6.3997040737 | 1.0015351766 | 6.1069684569  |
| O3  | 7.2110410509 | 5.7617968051 | 4.9245587146  |
| O4  | 5.0048525226 | 3.5329928341 | 4.6266911422  |
| O5  | 4.3441083548 | 1.5496049834 | 5.4882998994  |
| C6  | 4.2093339821 | 2.5382865675 | 4.7319010784  |
| C7  | 3.0006374539 | 2.5965530421 | 3.8397577374  |
| H8  | 3.2215877014 | 2.0083786666 | 2.9420538336  |
| H9  | 2.7764513219 | 3.6223688806 | 3.5407603662  |
| H10 | 2.1452220348 | 2.1346276004 | 4.3389210156  |
| N11 | 8.2817544821 | 3.7772059721 | 7.0829201776  |
| N12 | 5.9613156626 | 1.0340392671 | 8.1571003712  |
| C13 | 5.6330087434 | 4.0081114589 | 7.4322609488  |
| C14 | 4.2856336870 | 4.2529223783 | 7.5713439402  |
| H15 | 3.6105357040 | 4.1806972310 | 6.7229608034  |
| C16 | 3.7834701008 | 4.6169488004 | 8.8387939018  |
| H17 | 2.7167413106 | 4.8083489590 | 8.9414238849  |
| C18 | 4.6018818879 | 4.7329806347 | 9.9455857078  |
| H19 | 4.1875205131 | 5.0057880495 | 10.9149313400 |
| C20 | 5.9883823863 | 4.5233739164 | 9.8190773106  |

|      |               |               |               |
|------|---------------|---------------|---------------|
| C21  | 6.4827737769  | 4.1800355236  | 8.5439981195  |
| C22  | 7.8804590332  | 4.0387732996  | 8.3514841226  |
| C23  | 8.7950075159  | 4.1860421888  | 9.4068216500  |
| C24  | 10.1571552051 | 4.0305346146  | 9.0950243550  |
| H25  | 10.9014688428 | 4.1224983957  | 9.8848023401  |
| C26  | 10.5415749726 | 3.7671503906  | 7.7951911512  |
| H27  | 11.5873568758 | 3.6408826365  | 7.5315679430  |
| C28  | 9.5673356137  | 3.6502732989  | 6.7943232270  |
| H29  | 9.7998693123  | 3.4506962877  | 5.7487536227  |
| C30  | 8.2552260904  | 0.6198790419  | 6.7913555706  |
| C31  | 9.3978571508  | 0.3587997474  | 6.0752857461  |
| H32  | 9.3753166593  | 0.3176891920  | 4.9894159164  |
| C33  | 10.5990681286 | 0.1464280577  | 6.7855846718  |
| H34  | 11.5053844953 | -0.0579543632 | 6.2183842735  |
| C35  | 10.6527426790 | 0.1819653841  | 8.1653021213  |
| H36  | 11.5912601898 | 0.0044597474  | 8.6871863591  |
| C37  | 9.4808874060  | 0.4168111867  | 8.9095209256  |
| C38  | 8.2817262695  | 0.6333253311  | 8.1974886741  |
| C39  | 7.0695925036  | 0.8337536709  | 8.9077782684  |
| C40  | 7.0215442384  | 0.8021853139  | 10.3115708322 |
| C41  | 5.7578310017  | 0.9587470031  | 10.9072635622 |
| H42  | 5.6724049114  | 0.9428347749  | 11.9928434184 |
| C43  | 4.6365593459  | 1.1183605210  | 10.1171756551 |
| H44  | 3.6498129086  | 1.2303930384  | 10.5560738671 |
| C45  | 4.7721644791  | 1.1497195877  | 8.7227309622  |
| H46  | 3.9301476078  | 1.2823178235  | 8.0459619432  |
| C47  | 8.2536840687  | 0.6065678050  | 11.0152520163 |
| H48  | 8.2321002227  | 0.5929684610  | 12.1035987433 |
| C49  | 9.4242478265  | 0.4267926180  | 10.3427594771 |
| H50  | 10.3502544159 | 0.2662096827  | 10.8936226399 |
| C51  | 6.9285112981  | 4.6531441765  | 10.8954436963 |
| H52  | 6.5462479600  | 4.9018299548  | 11.8847341348 |
| C53  | 8.2667505892  | 4.4853056934  | 10.7042594310 |
| H54  | 8.9630280106  | 4.5910923990  | 11.5340553962 |
| Cl55 | 7.0339577103  | 0.9278599985  | 3.8813384593  |
| Cl56 | 6.0156476772  | -1.3566025226 | 6.1987359129  |
| O57  | 8.1282140047  | 3.9387666663  | 4.0699749446  |
| C58  | 7.9579050702  | 5.1976078236  | 4.0769356443  |
| C59  | 8.6509700555  | 6.0253949044  | 3.0312422815  |
| H60  | 8.7295030253  | 7.0679389053  | 3.3477732042  |
| H61  | 9.6391685568  | 5.6105607827  | 2.8144165111  |
| H62  | 8.0636962729  | 5.9838382125  | 2.1076120186  |

## Evaluation of Kinetic Advantage of Bimetallic Reductive Elimination (Data Pertaining to Eq 6)

An *in silico* experiment was performed where the solvent corrected electronic energy for activation for the C-Cl reductive elimination from Pd(III)-Pd(III) structure (**A**) was examined as a function of Pd-Pd distance. The following distances were chosen 2.62 Å (equilibrium distance found in **A**), 2.95 Å (about halfway between the sum of the covalent and vdW radii), 3.30 Å (about the sum of the vdW radii), 3.65 Å (longer than the sum of the vdW radii).<sup>25</sup>

Geometries were optimized with each Pd-Pd distance constraint and, as well as the respective transition structures at the M06/LACVP\*\* level. Energies were calculated using the LACV3P++\*(2f) basis set.

### XYZ Coordinates for *in silico* experiment

## Pd-Pd 2.95 Å

|      |               |               |               |
|------|---------------|---------------|---------------|
| H1   | -3.7840792335 | 0.6332995689  | 0.3316083904  |
| C2   | -2.7234541179 | 0.3874269375  | 0.3405482364  |
| H3   | -2.5738211770 | 0.3817565015  | -1.8050455681 |
| C4   | -2.0503507492 | 0.2494207768  | -0.8596112074 |
| C5   | -0.7424829791 | -0.0806150526 | 1.5890151218  |
| C6   | -0.6844793752 | -0.0934176776 | -0.8670382423 |
| C7   | -2.0826771509 | 0.2146986886  | 1.5870854912  |
| C8   | -0.0456998178 | -0.2490758940 | 0.3792668361  |
| C9   | 0.0983958773  | -0.3074827333 | -2.0501349352 |
| H10  | -2.6329162714 | 0.3069773201  | 2.5203705444  |
| C11  | 1.4072937744  | -0.6801498653 | -1.9895446261 |
| H12  | -0.3858815734 | -0.1770152808 | -3.0164866382 |
| H13  | 1.9767284411  | -0.8514624791 | -2.9009477524 |
| C14  | 2.0672780036  | -0.8636641199 | -0.7311272666 |
| C15  | 3.4002564065  | -1.2723301333 | -0.5560558917 |
| C16  | 1.3204572808  | -0.6195486624 | 0.4324565726  |
| C17  | 3.9119809480  | -1.4277200593 | 0.7178406738  |
| H18  | 4.0197353883  | -1.4728907207 | -1.4288176114 |
| H19  | 4.9338954135  | -1.7581217643 | 0.8767828416  |
| C20  | 3.1027893271  | -1.1551601477 | 1.8277769335  |
| H21  | 3.4461550513  | -1.2684823107 | 2.8539841542  |
| N22  | 1.8533773158  | -0.7450160345 | 1.6712485332  |
| Pd23 | 0.4752002581  | -0.3021665335 | 3.1484214037  |
| Pd24 | 1.2082778869  | 2.5501178720  | 3.3203810390  |
| H25  | 4.8880323781  | 2.1891363352  | -0.3212118757 |
| C26  | 3.8469090541  | 2.4021693546  | -0.0846599356 |
| H27  | 3.3139216949  | 2.7419254422  | -2.1392033721 |
| C28  | 2.9688711111  | 2.7105507448  | -1.1069451296 |
| C29  | 2.1228730276  | 2.6125347453  | 1.5538676629  |
| C30  | 1.6243803212  | 3.0116818746  | -0.8175546469 |
| C31  | 3.4400773080  | 2.3595551086  | 1.2662978751  |
| C32  | 1.2206535456  | 2.9527141845  | 0.5309582563  |
| C33  | 0.6413261036  | 3.3844193446  | -1.7938964202 |
| H34  | 4.1483842809  | 2.1343534019  | 2.0600960996  |
| C35  | -0.6348497509 | 3.7073928700  | -1.4430888287 |
| H36  | 0.9434543865  | 3.4160903334  | -2.8394850765 |
| H37  | -1.3598946997 | 3.9996505592  | -2.2006794811 |
| C38  | -1.0552172449 | 3.6788435745  | -0.0733197838 |
| C39  | -2.3334520307 | 4.0198923584  | 0.4000001950  |
| C40  | -0.1110876425 | 3.2778323617  | 0.8854858314  |
| C41  | -2.6052079304 | 3.9644509196  | 1.7535537412  |
| H42  | -3.1010012079 | 4.3339384846  | -0.3056264390 |
| H43  | -3.5810669317 | 4.2382904367  | 2.1426421057  |
| C44  | -1.6088694371 | 3.5460382339  | 2.6443254430  |
| H45  | -1.7609501098 | 3.4893324749  | 3.7201978412  |
| N46  | -0.4096284956 | 3.1975565812  | 2.2042346553  |
| C47  | -0.8651750510 | 1.2749260880  | 5.2491869228  |

|      |               |               |              |
|------|---------------|---------------|--------------|
| O48  | -0.0917532818 | 2.2460861364  | 5.1108950683 |
| O49  | -0.9652725174 | 0.2370067380  | 4.5065184049 |
| C50  | 2.8908346440  | 0.6654396774  | 4.8449466966 |
| O51  | 2.0868801678  | -0.2789192043 | 4.6954153236 |
| O52  | 2.8649818100  | 1.8170018813  | 4.2864906318 |
| C53  | -1.8164104584 | 1.2756327899  | 6.4191987668 |
| H54  | -1.9924788562 | 2.2949858990  | 6.7689837228 |
| H55  | -1.3571718940 | 0.7020664124  | 7.2316110609 |
| H56  | -2.7533543883 | 0.7789391132  | 6.1565528476 |
| C57  | 4.0524440304  | 0.4760310634  | 5.7879151659 |
| H58  | 4.9382099197  | 0.9986407174  | 5.4188521669 |
| H59  | 4.2542212871  | -0.5866064123 | 5.9378354647 |
| H60  | 3.7873287537  | 0.9227650046  | 6.7521249104 |
| Cl61 | 1.8508482732  | 4.8804881884  | 3.6882439320 |
| Cl62 | -0.1248986355 | -2.6712397100 | 3.2449768697 |

## Transition state for Pd-Pd 2.95 Å

|      |               |               |               |
|------|---------------|---------------|---------------|
| H1   | -3.9427344843 | 0.4883543526  | 0.4340041975  |
| C2   | -2.8721279492 | 0.2910203420  | 0.4079364769  |
| H3   | -2.8016394773 | 0.2460112799  | -1.7411027034 |
| C4   | -2.2375231281 | 0.1599227202  | -0.8135018378 |
| C5   | -0.8279285371 | -0.0767981776 | 1.5903094036  |
| C6   | -0.8596289791 | -0.1223929951 | -0.8668530849 |
| C7   | -2.1801050566 | 0.1616723353  | 1.6304568350  |
| C8   | -0.1677054497 | -0.2278494968 | 0.3565424163  |
| C9   | -0.1205225331 | -0.3443202127 | -2.0764480473 |
| H10  | -2.7015992553 | 0.2304337789  | 2.5821053478  |
| C11  | 1.1989158936  | -0.6823647906 | -2.0604719289 |
| H12  | -0.6486135650 | -0.2555157076 | -3.0251518371 |
| H13  | 1.7348391721  | -0.8669929198 | -2.9897530906 |
| C14  | 1.9125771722  | -0.8169105973 | -0.8257123307 |
| C15  | 3.2606480253  | -1.1920151133 | -0.6996658534 |
| C16  | 1.2096060013  | -0.5607638191 | 0.3628942144  |
| C17  | 3.8290267690  | -1.3048167777 | 0.5536174097  |
| H18  | 3.8456267674  | -1.4014576744 | -1.5942309809 |
| H19  | 4.8645449419  | -1.6077078792 | 0.6765984877  |
| C20  | 3.0580789321  | -1.0276397680 | 1.6899343135  |
| H21  | 3.4466362816  | -1.1196328646 | 2.7020459187  |
| N22  | 1.7936701990  | -0.6496988481 | 1.5823442840  |
| Pd23 | 0.4219195712  | -0.3017427956 | 3.1164195737  |
| Pd24 | 1.2276612380  | 2.5224428394  | 3.3943613168  |
| H25  | 4.9259407894  | 1.9419283140  | -0.1770142659 |
| C26  | 3.9212003327  | 2.2988149486  | 0.0424021470  |
| H27  | 3.3170807378  | 2.3007169899  | -2.0298673796 |
| C28  | 3.0230891174  | 2.4903609943  | -0.9988234374 |
| C29  | 2.3125564512  | 3.0539769894  | 1.6690704258  |
| C30  | 1.7128768673  | 2.9154495225  | -0.7208255011 |
| C31  | 3.5938309488  | 2.5936678636  | 1.3676125827  |



|      |               |               |               |
|------|---------------|---------------|---------------|
| C32  | 1.3469991638  | 3.1417452060  | 0.6228475956  |
| C33  | 0.7100909189  | 3.1012129814  | -1.7310242246 |
| H34  | 4.3339040045  | 2.5239628629  | 2.1606562628  |
| C35  | -0.5669824306 | 3.4533416281  | -1.4228719107 |
| H36  | 0.9993119368  | 2.9455318686  | -2.7693995742 |
| H37  | -1.3101839362 | 3.5924146422  | -2.2065250763 |
| C38  | -0.9837190851 | 3.5730702782  | -0.0585984690 |
| C39  | -2.3032325933 | 3.7932688679  | 0.3632352894  |
| C40  | -0.0147845005 | 3.3640912015  | 0.9432200829  |
| C41  | -2.6115535592 | 3.7708519583  | 1.7103564065  |
| H42  | -3.0815547871 | 3.9577703390  | -0.3808142847 |
| H43  | -3.6263175727 | 3.9366996021  | 2.0589874835  |
| C44  | -1.6079736276 | 3.4708229688  | 2.6373449827  |
| H45  | -1.8038144958 | 3.3722328612  | 3.7033269785  |
| N46  | -0.3558562761 | 3.2628782735  | 2.2542982943  |
| C47  | -0.9469417528 | 1.2050200951  | 5.2556666566  |
| O48  | -0.1468285885 | 2.1601444746  | 5.1715566544  |
| O49  | -1.0289909960 | 0.1763555704  | 4.5051582603  |
| C50  | 2.8478786886  | 0.5455454575  | 4.8788078009  |
| O51  | 2.0474358863  | -0.3830644871 | 4.6459872365  |
| O52  | 2.8326827497  | 1.7317695680  | 4.3999312134  |
| C53  | -1.9594607734 | 1.2313653173  | 6.3780395369  |
| H54  | -2.2757547446 | 2.2592972568  | 6.5742541875  |
| H55  | -1.4734873115 | 0.8528031015  | 7.2837562458  |
| H56  | -2.8149036178 | 0.5908087494  | 6.1558880908  |
| C57  | 3.9866722520  | 0.2829825283  | 5.8343150229  |
| H58  | 4.8536139286  | 0.9008534881  | 5.5890119090  |
| H59  | 4.2461083009  | -0.7781828435 | 5.8319632892  |
| H60  | 3.6575721889  | 0.5519010716  | 6.8440770742  |
| Cl61 | 2.4382938448  | 4.7360832014  | 2.8601638307  |
| Cl62 | -0.1617061820 | -2.6975402867 | 3.1043907172  |

## Pd-Pd 3.30 Å

|     |               |               |               |
|-----|---------------|---------------|---------------|
| H1  | -3.7917674868 | 0.6564386817  | 0.4171520116  |
| C2  | -2.7369752695 | 0.3867276830  | 0.4081362164  |
| H3  | -2.5921303662 | 0.5010408924  | -1.7348819918 |
| C4  | -2.0697279003 | 0.3030386567  | -0.8001132282 |
| C5  | -0.7640120190 | -0.1932664283 | 1.6197195679  |
| C6  | -0.7104648649 | -0.0640568565 | -0.8319942454 |
| C7  | -2.0973443917 | 0.1301723856  | 1.6409958501  |
| C8  | -0.0707957450 | -0.3020571516 | 0.4010173264  |
| C9  | 0.0678695463  | -0.2122451534 | -2.0283646831 |
| H10 | -2.6419770403 | 0.1826327707  | 2.5803229931  |
| C11 | 1.3764865965  | -0.5892320908 | -1.9931779091 |
| H12 | -0.4188941637 | -0.0208410897 | -2.9839362023 |
| H13 | 1.9440339420  | -0.7052605016 | -2.9145709876 |
| C14 | 2.0405352291  | -0.8428198261 | -0.7488819155 |
| C15 | 3.3802680332  | -1.2403325023 | -0.6001439666 |

---

|      |               |               |               |
|------|---------------|---------------|---------------|
| C16  | 1.2951522059  | -0.6759307289 | 0.4289527320  |
| C17  | 3.9003796729  | -1.4520976442 | 0.6620987452  |
| H18  | 3.9993320220  | -1.3829754274 | -1.4846318166 |
| H19  | 4.9297990730  | -1.7687406974 | 0.7995892489  |
| C20  | 3.0908724107  | -1.2535217392 | 1.7882326530  |
| H21  | 3.4436590489  | -1.4025903167 | 2.8069062737  |
| N22  | 1.8318916597  | -0.8646254156 | 1.6579456185  |
| Pd23 | 0.4549555548  | -0.4814597849 | 3.1626781389  |
| Pd24 | 1.2306879840  | 2.7203557127  | 3.3540351494  |
| H25  | 4.9210435967  | 2.1886147511  | -0.2436828704 |
| C26  | 3.8797762424  | 2.4175423382  | -0.0231118540 |
| H27  | 3.3526820083  | 2.6386362218  | -2.0956882230 |
| C28  | 3.0053630250  | 2.6681311492  | -1.0639461238 |
| C29  | 2.1511816234  | 2.7240788674  | 1.5939112927  |
| C30  | 1.6594060325  | 2.9832171584  | -0.7971790581 |
| C31  | 3.4688741074  | 2.4519732125  | 1.3270876204  |
| C32  | 1.2502289869  | 3.0017365577  | 0.5509806254  |
| C33  | 0.6778752793  | 3.2885248137  | -1.7983391468 |
| H34  | 4.1728793372  | 2.2691768218  | 2.1351605402  |
| C35  | -0.6036966227 | 3.6162159016  | -1.4724171207 |
| H36  | 0.9849118325  | 3.2600444853  | -2.8431452826 |
| H37  | -1.3287976759 | 3.8535072945  | -2.2491405054 |
| C38  | -1.0312607754 | 3.6595376561  | -0.1051339956 |
| C39  | -2.3197726424 | 3.9988907531  | 0.3412019434  |
| C40  | -0.0873353376 | 3.3299076141  | 0.8803711063  |
| C41  | -2.6021770345 | 4.0030386670  | 1.6936483352  |
| H42  | -3.0876912520 | 4.2602374529  | -0.3853496145 |
| H43  | -3.5881443207 | 4.2712078752  | 2.0606464344  |
| C44  | -1.6045596762 | 3.6500996287  | 2.6119393248  |
| H45  | -1.7679393851 | 3.6301310229  | 3.6876947655  |
| N46  | -0.3921986005 | 3.3134059885  | 2.1999593833  |
| C47  | -0.9130451291 | 1.2219163686  | 5.2014936793  |
| O48  | -0.1748097404 | 2.2149931499  | 5.0470245394  |
| O49  | -0.9540796092 | 0.1330037909  | 4.5273165187  |
| C50  | 2.9315439903  | 0.7230355435  | 4.7942045122  |
| O51  | 2.1579485995  | -0.2411158172 | 4.6278367398  |
| O52  | 2.8591269308  | 1.9094212815  | 4.3157047704  |
| C53  | -1.9150577705 | 1.2521271245  | 6.3329392718  |
| H54  | -2.1380243356 | 2.2823771859  | 6.6186438709  |
| H55  | -1.4723871859 | 0.7400372422  | 7.1940924139  |
| H56  | -2.8241881351 | 0.7110641485  | 6.0608481204  |
| C57  | 4.1394590460  | 0.5179998085  | 5.6801074046  |
| H58  | 4.9919471356  | 1.0935780534  | 5.3118455794  |
| H59  | 4.3826239500  | -0.5441357714 | 5.7547516006  |
| H60  | 3.8982488075  | 0.8923330410  | 6.6807312578  |
| Cl61 | 1.9072164554  | 5.0426515502  | 3.6804037733  |
| Cl62 | -0.1940674643 | -2.8342313963 | 3.2193806520  |

Transition state for Pd-Pd 3.30 Å

|      |               |               |               |
|------|---------------|---------------|---------------|
| H1   | -3.9971478178 | 0.3784241011  | 0.4948233819  |
| C2   | -2.9270514075 | 0.1817860370  | 0.4504456619  |
| H3   | -2.8737990443 | 0.2462470314  | -1.6989088310 |
| C4   | -2.3021811338 | 0.1123194409  | -0.7813868120 |
| C5   | -0.8732463836 | -0.2430973885 | 1.5954175194  |
| C6   | -0.9243201898 | -0.1651108944 | -0.8599114161 |
| C7   | -2.2257405817 | -0.0091031783 | 1.6595391137  |
| C8   | -0.2216516733 | -0.3311016095 | 0.3506357099  |
| C9   | -0.1933451241 | -0.3185874138 | -2.0848106686 |
| H10  | -2.7371852283 | 0.0159920140  | 2.6183955359  |
| C11  | 1.1309661310  | -0.6375956142 | -2.0979728370 |
| H12  | -0.7312657950 | -0.1866714166 | -3.0227201705 |
| H13  | 1.6581904797  | -0.7658850908 | -3.0423394584 |
| C14  | 1.8591810540  | -0.8176562615 | -0.8767587892 |
| C15  | 3.2192346986  | -1.1578315262 | -0.7781383752 |
| C16  | 1.1614552862  | -0.6388720517 | 0.3290173590  |
| C17  | 3.8032768636  | -1.3069474288 | 0.4644631373  |
| H18  | 3.8021820424  | -1.3083914690 | -1.6858197085 |
| H19  | 4.8495426717  | -1.5799156518 | 0.5646793463  |
| C20  | 3.0350523126  | -1.1056986785 | 1.6188950242  |
| H21  | 3.4374037445  | -1.2202393570 | 2.6237963894  |
| N22  | 1.7573271810  | -0.7691512190 | 1.5390049226  |
| Pd23 | 0.3909536996  | -0.4776423339 | 3.0990508425  |
| Pd24 | 1.2636646916  | 2.6859400298  | 3.4454895979  |
| H25  | 4.9907064022  | 1.9589848592  | -0.0485414146 |
| C26  | 3.9820198813  | 2.3200756159  | 0.1437016717  |
| H27  | 3.4077690695  | 2.2483698562  | -1.9348257441 |
| C28  | 3.0982793848  | 2.4728822109  | -0.9152355371 |
| C29  | 2.3450249103  | 3.1180660063  | 1.7182808690  |
| C30  | 1.7816563905  | 2.9016381300  | -0.6725083633 |
| C31  | 3.6330990767  | 2.6594942743  | 1.4530455000  |
| C32  | 1.3961049672  | 3.1738999295  | 0.6571574078  |
| C33  | 0.7922179316  | 3.0377552873  | -1.7030532761 |
| H34  | 4.3592088296  | 2.6158136055  | 2.2604782069  |
| C35  | -0.4956795373 | 3.3734701378  | -1.4229144560 |
| H36  | 1.0975525872  | 2.8498131273  | -2.7317706361 |
| H37  | -1.2325720238 | 3.4650099322  | -2.2195643809 |
| C38  | -0.9311487645 | 3.5372984975  | -0.0694212465 |
| C39  | -2.2624187614 | 3.7383813338  | 0.3262399579  |
| C40  | 0.0284219149  | 3.3977859920  | 0.9518226098  |
| C41  | -2.5885768596 | 3.7645650689  | 1.6683263973  |
| H42  | -3.0336275428 | 3.8493465295  | -0.4343474679 |
| H43  | -3.6127156911 | 3.9141511064  | 1.9962635075  |
| C44  | -1.5873154809 | 3.5431695313  | 2.6205411471  |
| H45  | -1.7941167863 | 3.4898959330  | 3.6876778276  |
| N46  | -0.3245889531 | 3.3591261580  | 2.2627571799  |
| C47  | -0.9654005390 | 1.1964676224  | 5.1810254314  |

|      |               |               |              |
|------|---------------|---------------|--------------|
| O48  | -0.1689817866 | 2.1571247036  | 5.0904751667 |
| O49  | -1.0270238166 | 0.1296552619  | 4.4885718799 |
| C50  | 2.8803084718  | 0.6077303966  | 4.8326494577 |
| O51  | 2.0925531700  | -0.3222732481 | 4.5746705410 |
| O52  | 2.8433239632  | 1.8272210843  | 4.4426342076 |
| C53  | -2.0170541594 | 1.2857570926  | 6.2670760933 |
| H54  | -2.3637784822 | 2.3179231645  | 6.3691315083 |
| H55  | -1.5542246665 | 0.9967103046  | 7.2166003039 |
| H56  | -2.8498407503 | 0.6090420641  | 6.0684169945 |
| C57  | 4.0543879664  | 0.2966043302  | 5.7347509428 |
| H58  | 4.8561422479  | 1.0276946536  | 5.6141359704 |
| H59  | 4.4145442553  | -0.7169714980 | 5.5397448068 |
| H60  | 3.7075177175  | 0.3304287819  | 6.7731986320 |
| Cl61 | 2.4718904230  | 4.8864459804  | 2.8659905703 |
| Cl62 | -0.2159103695 | -2.8689509471 | 3.1299796895 |

## Pd-Pd 3.65 Å

|      |               |               |               |
|------|---------------|---------------|---------------|
| H1   | -3.8578656897 | 0.5419903937  | 0.5492068916  |
| C2   | -2.8008246761 | 0.2837402315  | 0.5149741938  |
| H3   | -2.6812642751 | 0.5108260526  | -1.6193290747 |
| C4   | -2.1459533823 | 0.2673717720  | -0.7023940231 |
| C5   | -0.8094668680 | -0.3357555177 | 1.6667928047  |
| C6   | -0.7830785057 | -0.0795276884 | -0.7705970720 |
| C7   | -2.1451955364 | -0.0290340492 | 1.7255289041  |
| C8   | -0.1259030621 | -0.3799470306 | 0.4392256466  |
| C9   | -0.0156576896 | -0.1439080370 | -1.9815979812 |
| H10  | -2.6753398768 | -0.0302625064 | 2.6742527443  |
| C11  | 1.3004522521  | -0.4952098907 | -1.9811698494 |
| H12  | -0.5160366560 | 0.0980723600  | -2.9187050337 |
| H13  | 1.8614151817  | -0.5402317338 | -2.9130955504 |
| C14  | 1.9822121697  | -0.8102944577 | -0.7604710071 |
| C15  | 3.3344710689  | -1.1762728679 | -0.6473789305 |
| C16  | 1.2454891619  | -0.7364131257 | 0.4321704107  |
| C17  | 3.8741979123  | -1.4458073845 | 0.5954503629  |
| H18  | 3.9487753338  | -1.2441840011 | -1.5441486464 |
| H19  | 4.9152535725  | -1.7341534883 | 0.7051473437  |
| C20  | 3.0697990939  | -1.3402884116 | 1.7381022009  |
| H21  | 3.4418709607  | -1.5258656392 | 2.7440255341  |
| N22  | 1.7971985809  | -0.9894543386 | 1.6425112803  |
| Pd23 | 0.4228345103  | -0.6614735496 | 3.1833862992  |
| Pd24 | 1.2677348982  | 2.8842195048  | 3.3749750503  |
| H25  | 4.9896068867  | 2.2143176137  | -0.1464890355 |
| C26  | 3.9471738015  | 2.4568363973  | 0.0525242082  |
| H27  | 3.4452825851  | 2.5926181494  | -2.0331467641 |
| C28  | 3.0857882903  | 2.6677596686  | -1.0078408898 |
| C29  | 2.2023550466  | 2.8390886509  | 1.6290434451  |
| C30  | 1.7375834848  | 2.9982528965  | -0.7721349642 |
| C31  | 3.5227251200  | 2.5493608691  | 1.3955919352  |

|      |               |               |               |
|------|---------------|---------------|---------------|
| C32  | 1.3113322440  | 3.0782704913  | 0.5683500298  |
| C33  | 0.7674166265  | 3.2547208589  | -1.7977887043 |
| H34  | 4.2135353027  | 2.3990214382  | 2.2208804301  |
| C35  | -0.5224663768 | 3.5800603297  | -1.5034422109 |
| H36  | 1.0888692586  | 3.1831615955  | -2.8362182216 |
| H37  | -1.2399638865 | 3.7728706539  | -2.2994996059 |
| C38  | -0.9703015824 | 3.6739996333  | -0.1451811633 |
| C39  | -2.2740486284 | 3.9975403507  | 0.2686642477  |
| C40  | -0.0336008655 | 3.4096200263  | 0.8664924014  |
| C41  | -2.5777916831 | 4.0466993067  | 1.6153014349  |
| H42  | -3.0377213468 | 4.2081162502  | -0.4786515583 |
| H43  | -3.5772234648 | 4.2990109095  | 1.9567786419  |
| C44  | -1.5839029434 | 3.7603265444  | 2.5608256365  |
| H45  | -1.7666834235 | 3.7683401620  | 3.6336744879  |
| N46  | -0.3554663081 | 3.4464011128  | 2.1811688763  |
| C47  | -0.9620727790 | 1.1495426267  | 5.1373075509  |
| O48  | -0.2410236373 | 2.1422445051  | 4.9358168053  |
| O49  | -0.9604763045 | 0.0054226048  | 4.5568353263  |
| C50  | 2.9642368754  | 0.8051670713  | 4.7387269067  |
| O51  | 2.1965937704  | -0.1534319354 | 4.5433267617  |
| O52  | 2.8712838206  | 2.0216159426  | 4.3439962736  |
| C53  | -2.0092932671 | 1.2424928216  | 6.2286243264  |
| H54  | -2.2513531935 | 2.2871112833  | 6.4370090129  |
| H55  | -1.5965247175 | 0.7932671031  | 7.1383172464  |
| H56  | -2.9037731470 | 0.6759962693  | 5.9591188264  |
| C57  | 4.2052967392  | 0.5592190606  | 5.5730281130  |
| H58  | 5.0357566683  | 1.1807861092  | 5.2304311547  |
| H59  | 4.4717443970  | -0.5000214801 | 5.5558245330  |
| H60  | 3.9843144862  | 0.8434833762  | 6.6072880978  |
| Cl61 | 2.0194941907  | 5.1922437348  | 3.6638821902  |
| Cl62 | -0.3105591014 | -2.9932357784 | 3.2084342094  |

## Transition state for Pd-Pd 3.65 Å

|     |               |               |               |
|-----|---------------|---------------|---------------|
| H1  | -4.2977246448 | -0.0719151001 | 0.7138324542  |
| C2  | -3.2307040585 | -0.2009024108 | 0.5390208297  |
| H3  | -3.4685043080 | -0.3408822785 | -1.5933780065 |
| C4  | -2.7709187878 | -0.3470455598 | -0.7570053999 |
| C5  | -1.0192387602 | -0.3949131669 | 1.4233261966  |
| C6  | -1.3979483429 | -0.5444644864 | -1.0008107033 |
| C7  | -2.3651446600 | -0.2382836997 | 1.6524524526  |
| C8  | -0.5316139805 | -0.5508854056 | 0.1112820347  |
| C9  | -0.8241860012 | -0.7676514524 | -2.2972654354 |
| H10 | -2.7456246171 | -0.1625435901 | 2.6677928769  |
| C11 | 0.5098040411  | -0.9908647009 | -2.4647133604 |
| H12 | -1.4888831130 | -0.7729527555 | -3.1605760078 |
| H13 | 0.9187022561  | -1.1755282479 | -3.4569860804 |
| C14 | 1.4049973986  | -0.9943515619 | -1.3453568716 |
| C15 | 2.7918203319  | -1.2212071071 | -1.4042559874 |

---

|      |               |               |               |
|------|---------------|---------------|---------------|
| C16  | 0.8574837719  | -0.7558002959 | -0.0741205408 |
| C17  | 3.5415786231  | -1.2035695024 | -0.2441654458 |
| H18  | 3.2635980860  | -1.4172400623 | -2.3663814381 |
| H19  | 4.6135848884  | -1.3775663103 | -0.2670198071 |
| C20  | 2.9141184265  | -0.9461533460 | 0.9835060802  |
| H21  | 3.4532046427  | -0.9055754181 | 1.9285779662  |
| N22  | 1.6131273550  | -0.7189392275 | 1.0498461181  |
| Pd23 | 0.4152204172  | -0.4303637698 | 2.7683413307  |
| Pd24 | 1.3339677802  | 2.9807983140  | 3.6861514019  |
| H25  | 5.4251557165  | 2.0216664828  | 0.6574840831  |
| C26  | 4.3809553760  | 2.3225243488  | 0.7147204548  |
| H27  | 4.0058192303  | 1.9440907281  | -1.3723850102 |
| C28  | 3.5902470080  | 2.2740055855  | -0.4217839627 |
| C29  | 2.5553882351  | 3.1849263518  | 2.0098403345  |
| C30  | 2.2294937479  | 2.6235052986  | -0.3524165421 |
| C31  | 3.8834880097  | 2.7909436151  | 1.9356226849  |
| C32  | 1.7061641070  | 3.0648344529  | 0.8817556106  |
| C33  | 1.3335337033  | 2.4979933319  | -1.4655676773 |
| H34  | 4.5241739482  | 2.8981063241  | 2.8064071026  |
| C35  | 0.0015794526  | 2.7425961853  | -1.3443610201 |
| H36  | 1.7456733976  | 2.1708591838  | -2.4195501083 |
| H37  | -0.6661820734 | 2.6163201852  | -2.1953386603 |
| C38  | -0.5649706957 | 3.0972499574  | -0.0788929757 |
| C39  | -1.9421754515 | 3.2223604913  | 0.1651846438  |
| C40  | 0.3031104366  | 3.2379329911  | 1.0215861996  |
| C41  | -2.3960544876 | 3.4487826726  | 1.4489891502  |
| H42  | -2.6430695006 | 3.1079418868  | -0.6603763296 |
| H43  | -3.4564455777 | 3.5372201032  | 1.6652115404  |
| C44  | -1.4716358604 | 3.5175663592  | 2.4973618384  |
| H45  | -1.7775390737 | 3.6321357954  | 3.5355709945  |
| N46  | -0.1694802259 | 3.4145827823  | 2.2807534358  |
| C47  | -0.9198498140 | 1.2233067356  | 5.0539612688  |
| O48  | -0.1709374832 | 2.2336938570  | 5.0826570785  |
| O49  | -0.9114152507 | 0.2250526968  | 4.2798052442  |
| C50  | 2.9233367027  | 0.8359938669  | 4.7673232393  |
| O51  | 2.3195204382  | 0.0434188463  | 4.0262103931  |
| O52  | 2.8017210935  | 2.1147848229  | 4.8327036675  |
| C53  | -2.0014988265 | 1.1959263791  | 6.1167093050  |
| H54  | -2.4903963480 | 2.1727634862  | 6.1776611198  |
| H55  | -1.5291680038 | 1.0080179315  | 7.0862647983  |
| H56  | -2.7289089251 | 0.4078031643  | 5.9157451441  |
| C57  | 3.9458309734  | 0.2759664885  | 5.7309927781  |
| H58  | 4.5690240046  | 1.0583613782  | 6.1668892985  |
| H59  | 4.5605757522  | -0.4678270151 | 5.2166947254  |
| H60  | 3.4090260494  | -0.2449666428 | 6.5306187427  |
| Cl61 | 2.5233526730  | 5.1107821901  | 3.0049329933  |
| Cl62 | -0.0064455082 | -2.8868474694 | 3.0131306094  |

## Cross-Over Experiments (Data Pertaining Scheme 6)

### Cross-Over Between Acetate-Bridged **9** and Benzoate Bridged **S18**

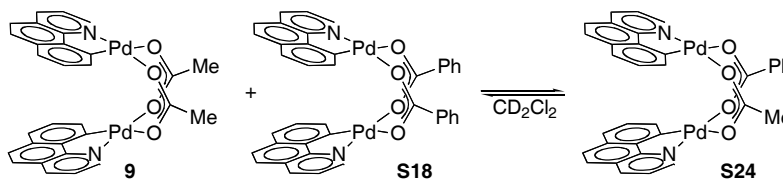

A solution of benzo[*h*]quinolynyl palladium acetate dimer (**9**) (8.7 mg,  $1.3 \times 10^{-5}$  mol, 1.0 equiv) in  $\text{CD}_2\text{Cl}_2$  (1.0 mL) was added to a solution of benzo[*h*]quinolynyl palladium benzoate dimer (**S18**) (10.3 mg,  $1.27 \times 10^{-5}$  mol, 1.00 equiv) in  $\text{CD}_2\text{Cl}_2$  (1.0 mL) at 23 °C. A  $^1\text{H}$  NMR spectrum of the reaction mixture was obtained which contained the  $^1\text{H}$  NMR signals of **9** and **S18** as well as an additional species, assigned as **S24**. The ratio of **9** and **S24** can be assayed by comparison of the  $^1\text{H}$  NMR signal at 2.38 ppm (**9**) and at 2.34 ppm (**S24**). The  $^1\text{H}$  NMR spectrum of the crude reaction mixture is reproduced below.

### Synthesis of Cross-over Intermediate **33**

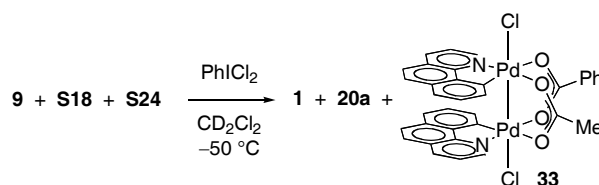

A solution of benzo[*h*]quinolynyl palladium acetate dimer (**9**) (14.9 mg,  $2.17 \times 10^{-5}$  mol, 0.50 equiv) and benzo[*h*]quinolynyl palladium benzoate dimer (**S18**) (17.6 mg,  $2.17 \times 10^{-5}$  mol, 0.50 equiv) in  $\text{CD}_2\text{Cl}_2$  (3.0 mL) was prepared at 23 °C. The reaction mixture was cooled to  $-50$  °C at which temperature  $\text{PhICl}_2$  (11.9 mg,  $4.34 \times 10^{-5}$  mol, 1.00 equiv) is added to the reaction mixture as a solid. A  $^1\text{H}$  NMR spectrum of the reaction mixture was obtained at  $-50$  °C which contained the  $^1\text{H}$  NMR signals of **1** and **20a** as well as an additional species, assigned as **33**. The presence of **33** in the reaction mixture was assayed by the  $^1\text{H}$  NMR signal at 2.64 ppm and the ratio of **1** and **33** could be determined by the ratio of the  $^1\text{H}$  NMR signals at 2.70 ppm (**1**) and 2.64 ppm (**33**). The  $^1\text{H}$  NMR spectrum of the crude reaction mixture is reproduced below.

### Thermolysis of Mixture of **1**, **20a**, and **33**

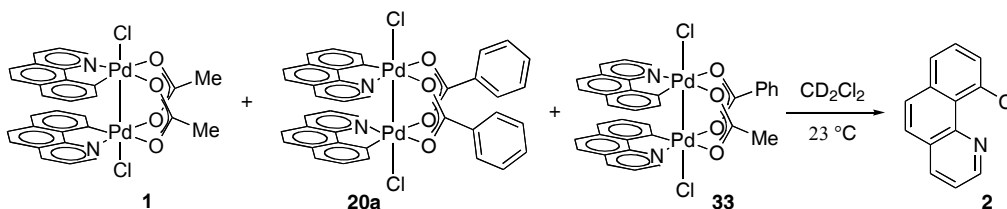

A solution of **1**, **20a**, and **33** (prepared above) was warmed from  $-50\text{ }^{\circ}\text{C}$  to  $23\text{ }^{\circ}\text{C}$  at which temperature it was maintained for 5 minutes. Subsequently, the reaction solution was cooled to  $-50\text{ }^{\circ}\text{C}$  and a  $^1\text{H}$  NMR spectrum was obtained. The  $^1\text{H}$  NMR showed the formation of **2** and that the ratio of **1** and **33** did not change. Subsequent cycles of warming to  $23\text{ }^{\circ}\text{C}$  followed by cooling to  $-50\text{ }^{\circ}\text{C}$  for  $^1\text{H}$  NMR analysis showed gradual increase in the yield of **2** with no change in the ratio of **1** and **33**. The reaction was monitored in this fashion until 20% yield in **2** based the combined amount of **1**, **20a**, and **33**. A  $^1\text{H}$  NMR spectrum is reproduced below showing **1**, **20a**, **33**, and **2**.

### Thermolysis of Mixture of **1** and **20a**

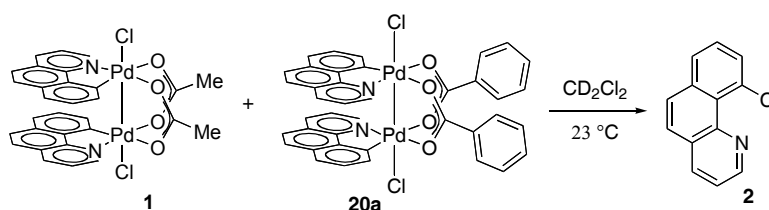

A solution of **1** was prepared by addition of  $\text{PhICl}_2$  (3.9 mg,  $1.4 \times 10^{-5}$ , 1.0 equiv) to benzo[*h*]quinolinyl palladium acetate dimer (**9**) (9.8 mg,  $1.4 \times 10^{-5}$ , 1.0 equiv) in  $\text{CD}_2\text{Cl}_2$  (0.7 mL) at  $-50\text{ }^{\circ}\text{C}$ . This solution was added (at  $-50\text{ }^{\circ}\text{C}$ ) to a solution of **20a**, prepared by addition of  $\text{PhICl}_2$  (3.9 mg,  $1.4 \times 10^{-5}$ , 1.0 equiv) to benzo[*h*]quinolinyl palladium benzoate dimer (**S18**) (11.5 mg,  $1.42 \times 10^{-5}$ , 1.00 equiv) in  $\text{CD}_2\text{Cl}_2$  (0.7 mL) at  $-50\text{ }^{\circ}\text{C}$ . The solution of **1** and **20a** was warmed from  $-50\text{ }^{\circ}\text{C}$  to  $23\text{ }^{\circ}\text{C}$  at which temperature it was maintained for 5 minutes. Subsequently, the reaction solution was cooled to  $-50\text{ }^{\circ}\text{C}$  and a  $^1\text{H}$  NMR spectrum was obtained. The  $^1\text{H}$  NMR showed the formation of **2**. Compound **2** was observed without the formation of detectable amounts of **33**. Subsequent cycles of warming to  $23\text{ }^{\circ}\text{C}$  followed by cooling to  $-50\text{ }^{\circ}\text{C}$  for  $^1\text{H}$  NMR analysis showed gradual increase in the yield of **2** without the evolution of **33**.  $^1\text{H}$  NMR spectra at later times in the reaction (approximately 20% yield of **2** based on the combined amount of **1** and **20a**) showed the evolution of a small amount of **33**, likely due to exchange with the Pd(II) complexes generated during reductive elimination. A  $^1\text{H}$  NMR spectrum is reproduced below showing the formation of **2** and the absence of **33**.

### Thermolysis of Mixture of **1** and **20a** with Added Benzo[*h*]quinoline (**8**)

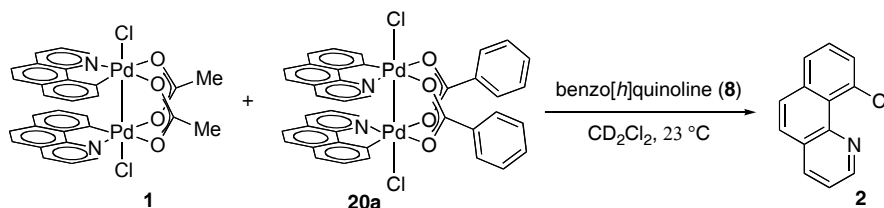

A solution of **1** was prepared by addition of  $\text{PhICl}_2$  (3.6 mg,  $1.4 \times 10^{-5}$ , 1.0 equiv) to benzo[*h*]quinolinyl palladium acetate dimer (**9**) (9.0 mg,  $1.3 \times 10^{-5}$ , 1.0 equiv) in  $\text{CD}_2\text{Cl}_2$  (0.7 mL) at  $-50\text{ }^{\circ}\text{C}$ . This solution was added (at  $-50\text{ }^{\circ}\text{C}$ ) to a solution of **20a**, prepared by addition of  $\text{PhICl}_2$  (3.6 mg,  $1.4 \times 10^{-5}$ , 1.0 equiv)



to benzo[*h*]quinoliny] palladium benzoate dimer (**S18**) (10.6 mg,  $1.31 \times 10^{-5}$ , 1.00 equiv) in CD<sub>2</sub>Cl<sub>2</sub> (0.7 mL) at -50 °C. Benzo[*h*]quinoline (**8**) (4.7 mg,  $2.6 \times 10^{-5}$ , 2.0 equiv) was added to the combined solution of **1** and **20a** at -50 °C. The solution of **1**, **20a**, and **8** was warmed from -50 °C to 23 °C at which temperature it was maintained for 5 minutes. Subsequently, the reaction solution was cooled to -50 °C and a <sup>1</sup>H NMR spectrum was obtained. The <sup>1</sup>H NMR showed the formation of **2**. Compound **2** was observed without the formation of detectable amounts of **33**. Subsequent cycles of warming to 23 °C followed by cooling to -50 °C for <sup>1</sup>H NMR analysis showed gradual increase in the yield of **2** without the evolution of **33**. <sup>1</sup>H NMR spectra at later times in the reaction (approximately 20% yield of **2** based on the combined amount of **1** and **20a**) showed the evolution of a small amount of **33**, likely due to exchange with the Pd(II) complexes generated during reductive elimination. A <sup>1</sup>H NMR spectrum is reproduced below showing the formation of **2** and the absence of **33**.

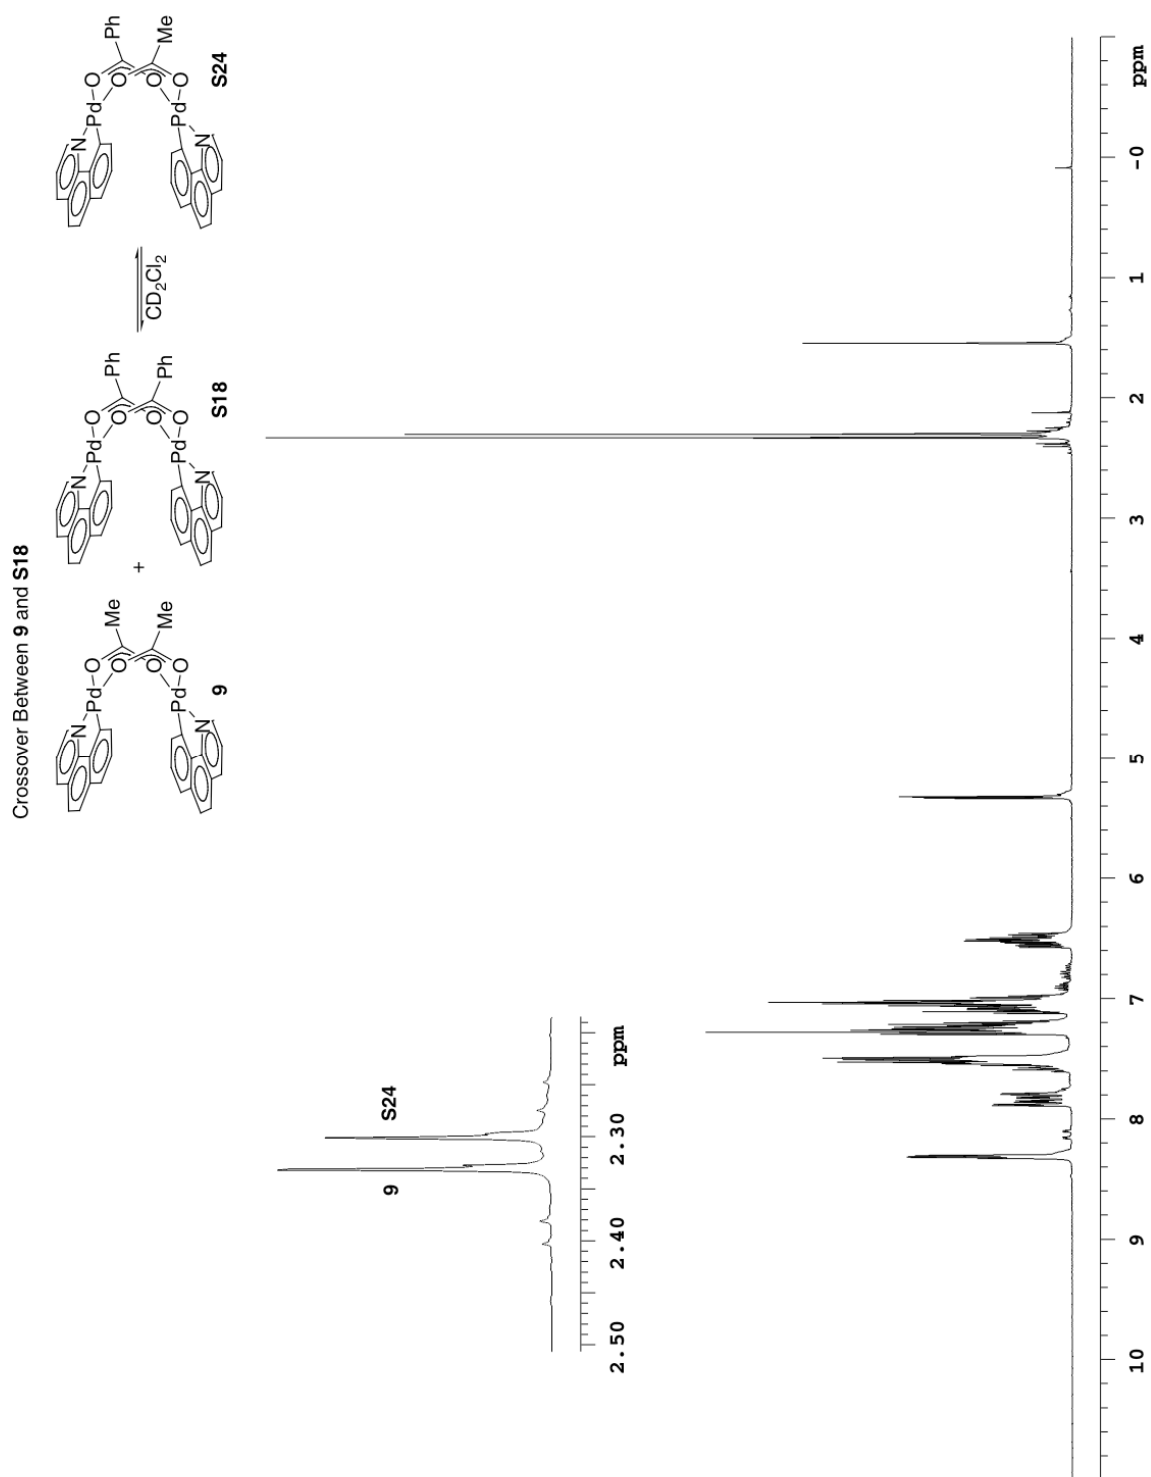

Oxidation of a Mixture of **9**, **S18**, and **S24**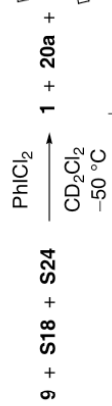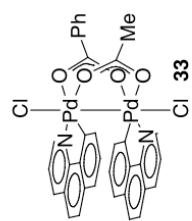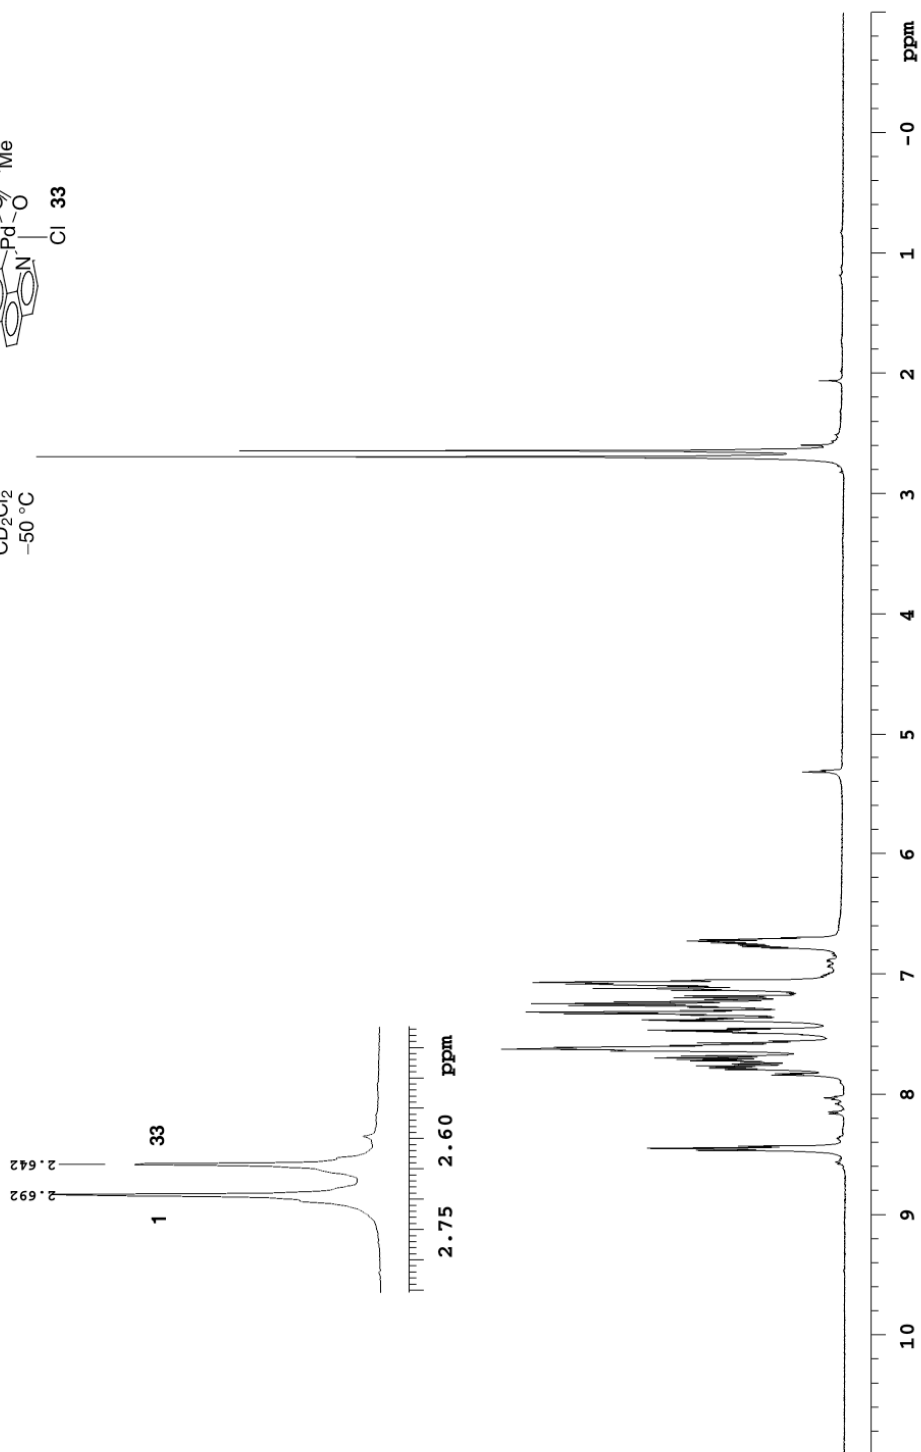

Thermolysis of Mixture of **1**, **20a**, and **33** (Spectrum Obtained at  $-50\text{ }^{\circ}\text{C}$ )

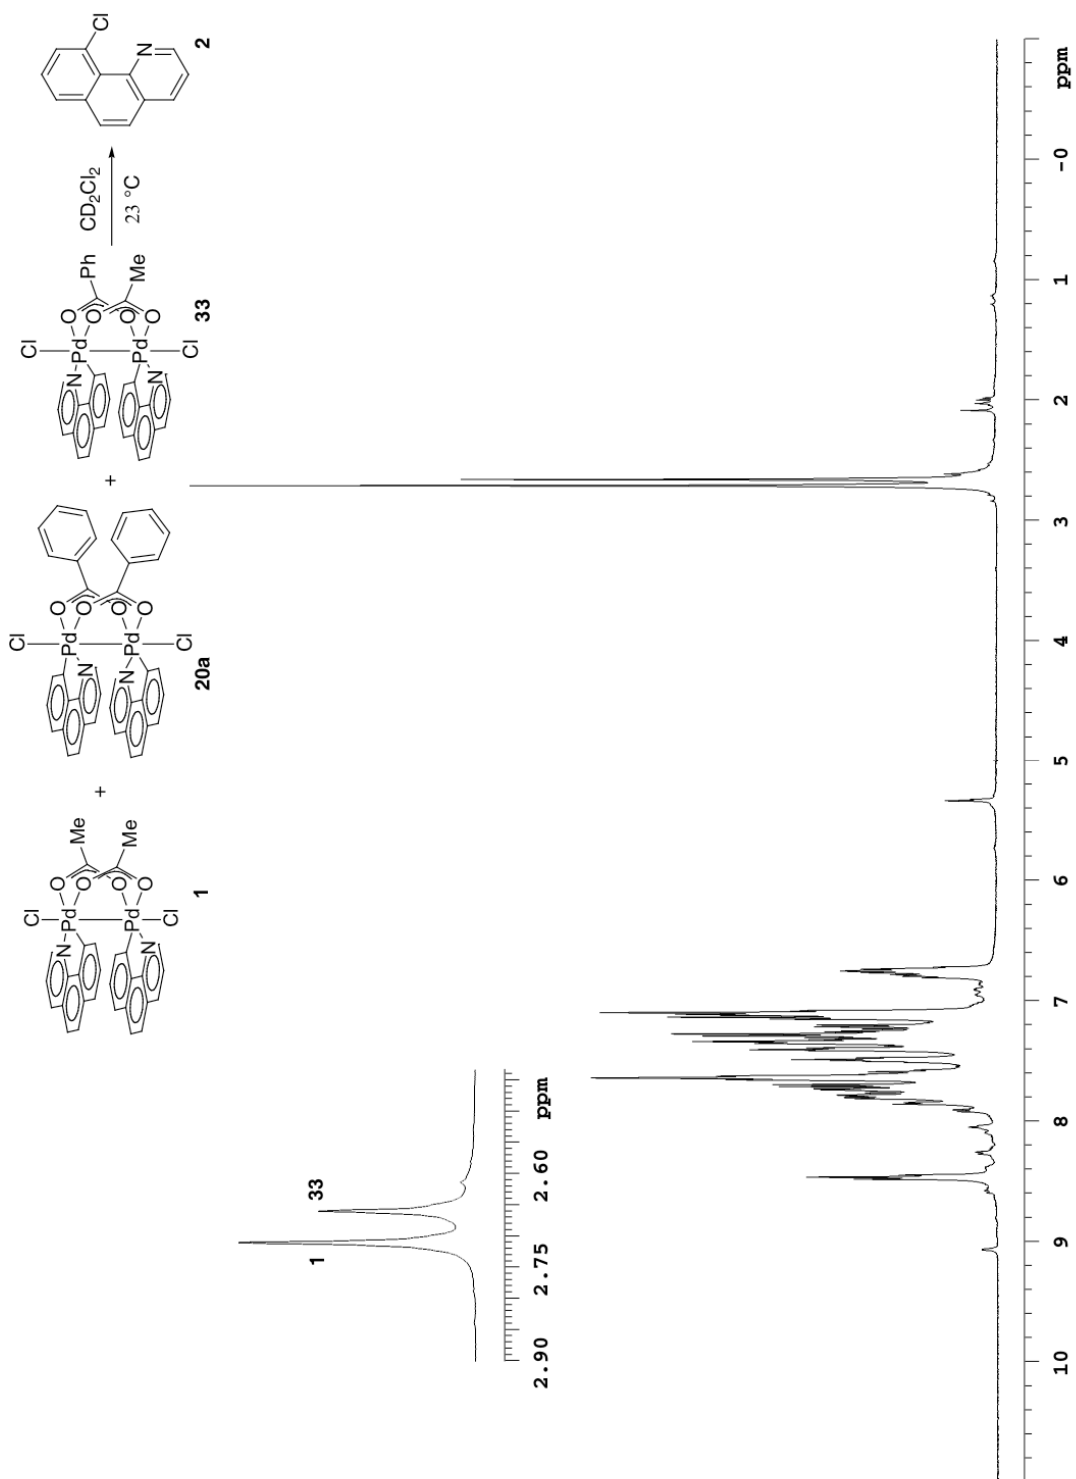

Thermolysis of Mixture of **1** and **20a** (Before Heating to 23 °C) (Spectrum Obtained at -50 °C)

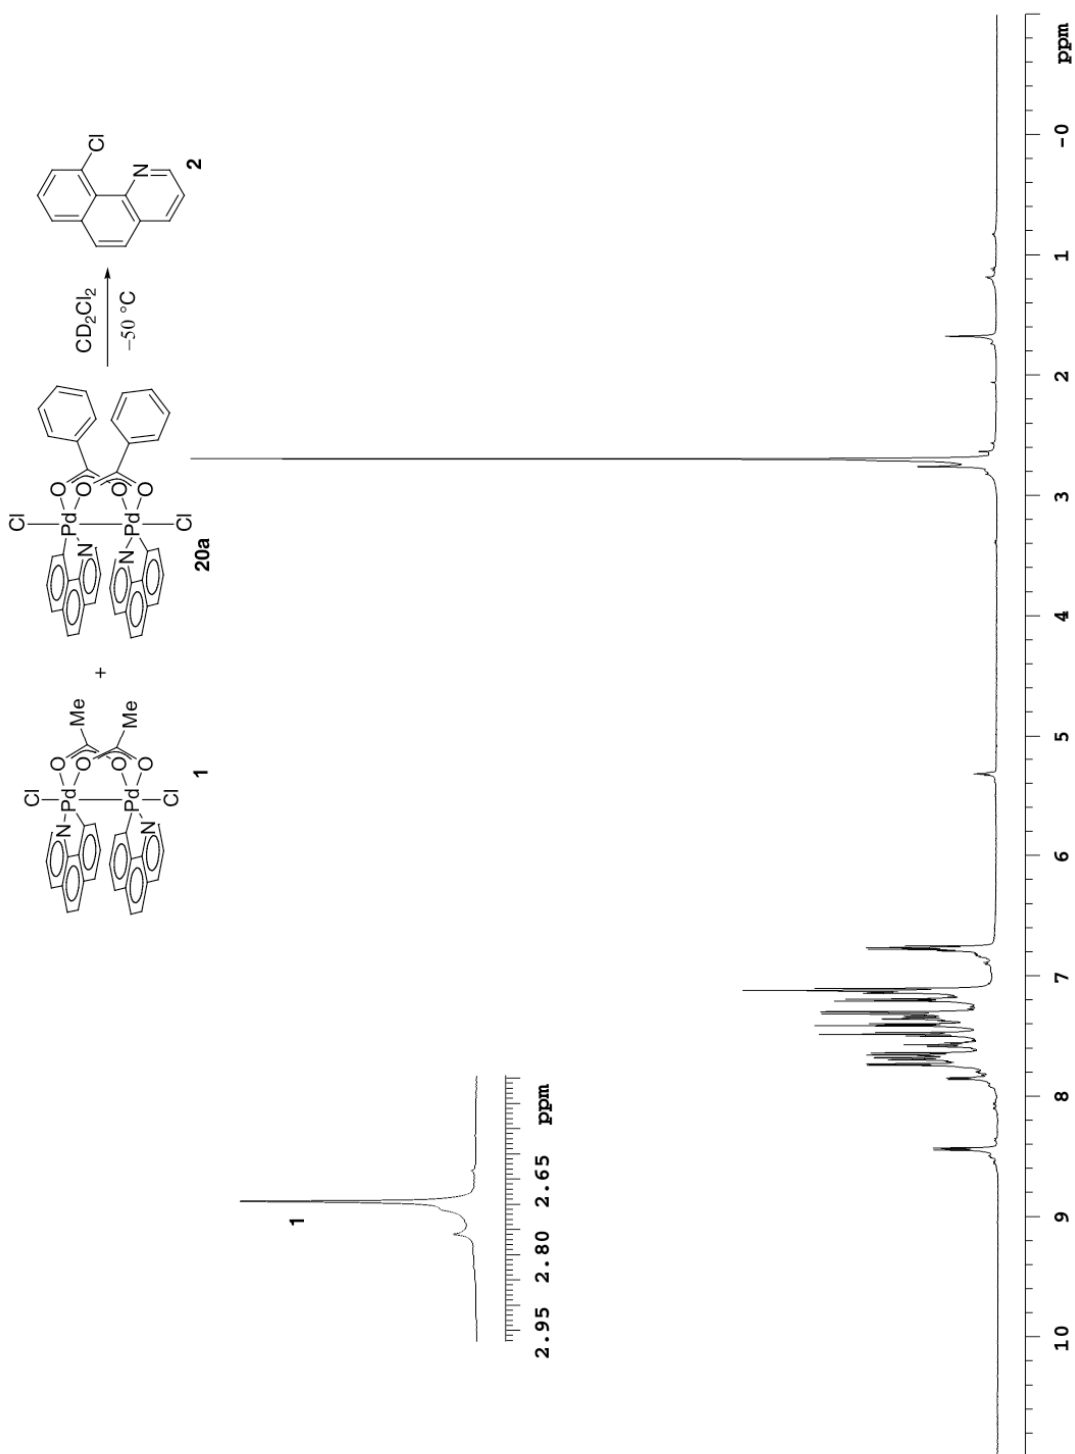

Thermolysis of Mixture of **1** and **20a** (After Heating to 23 °C) (Spectrum Obtained at -5.0 °C)

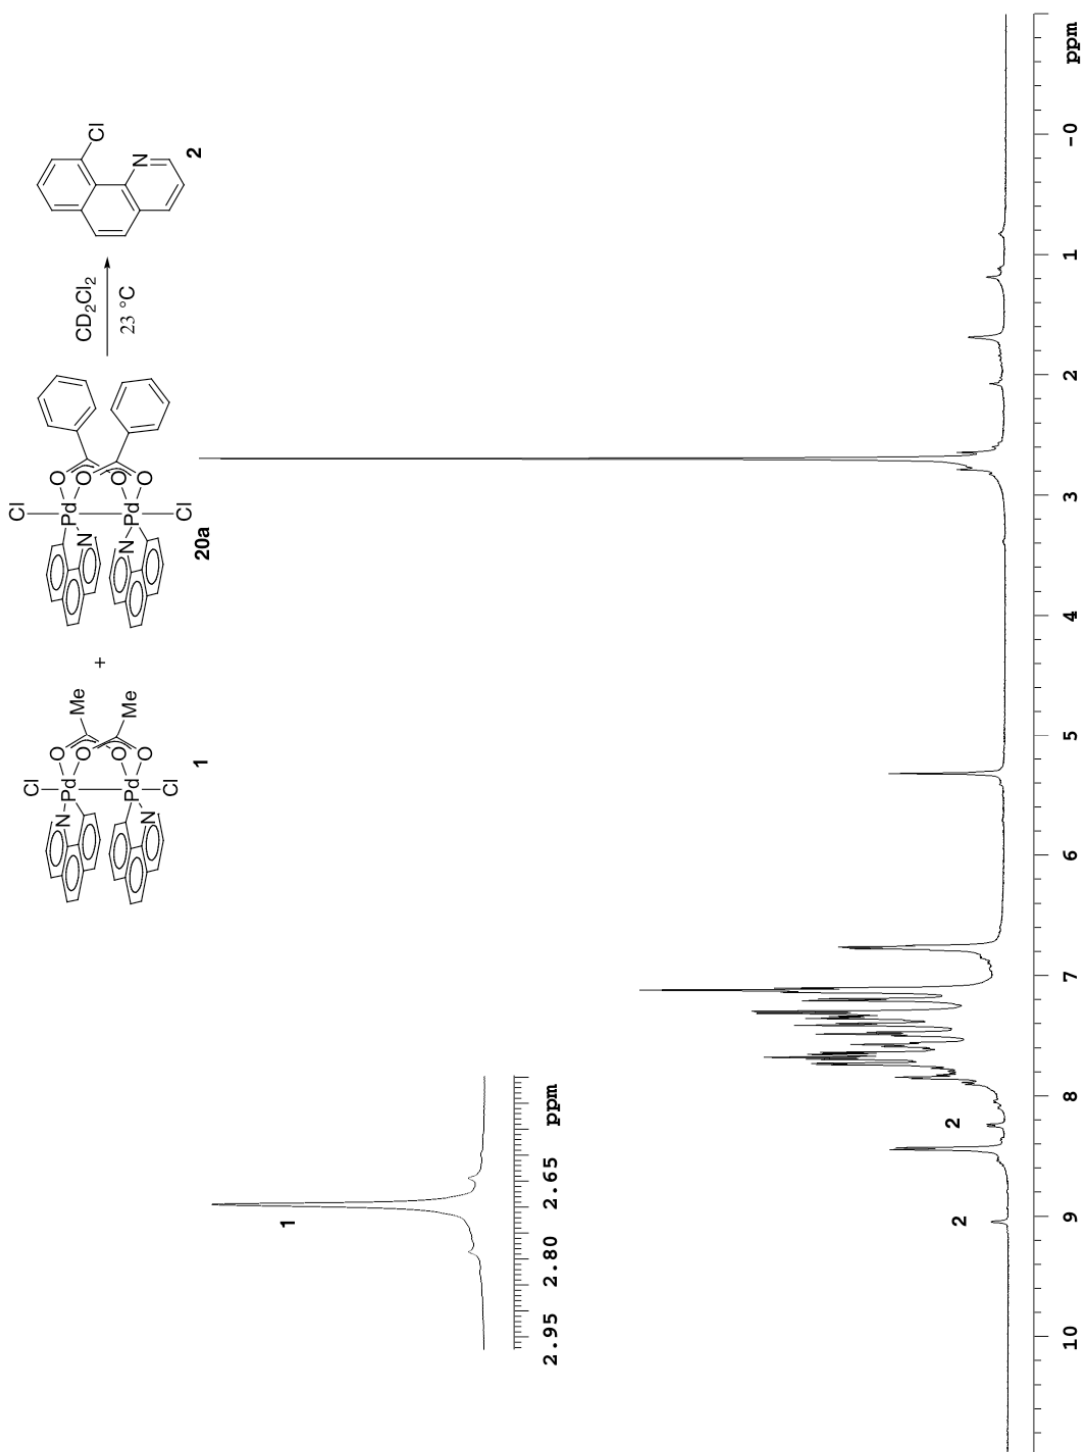

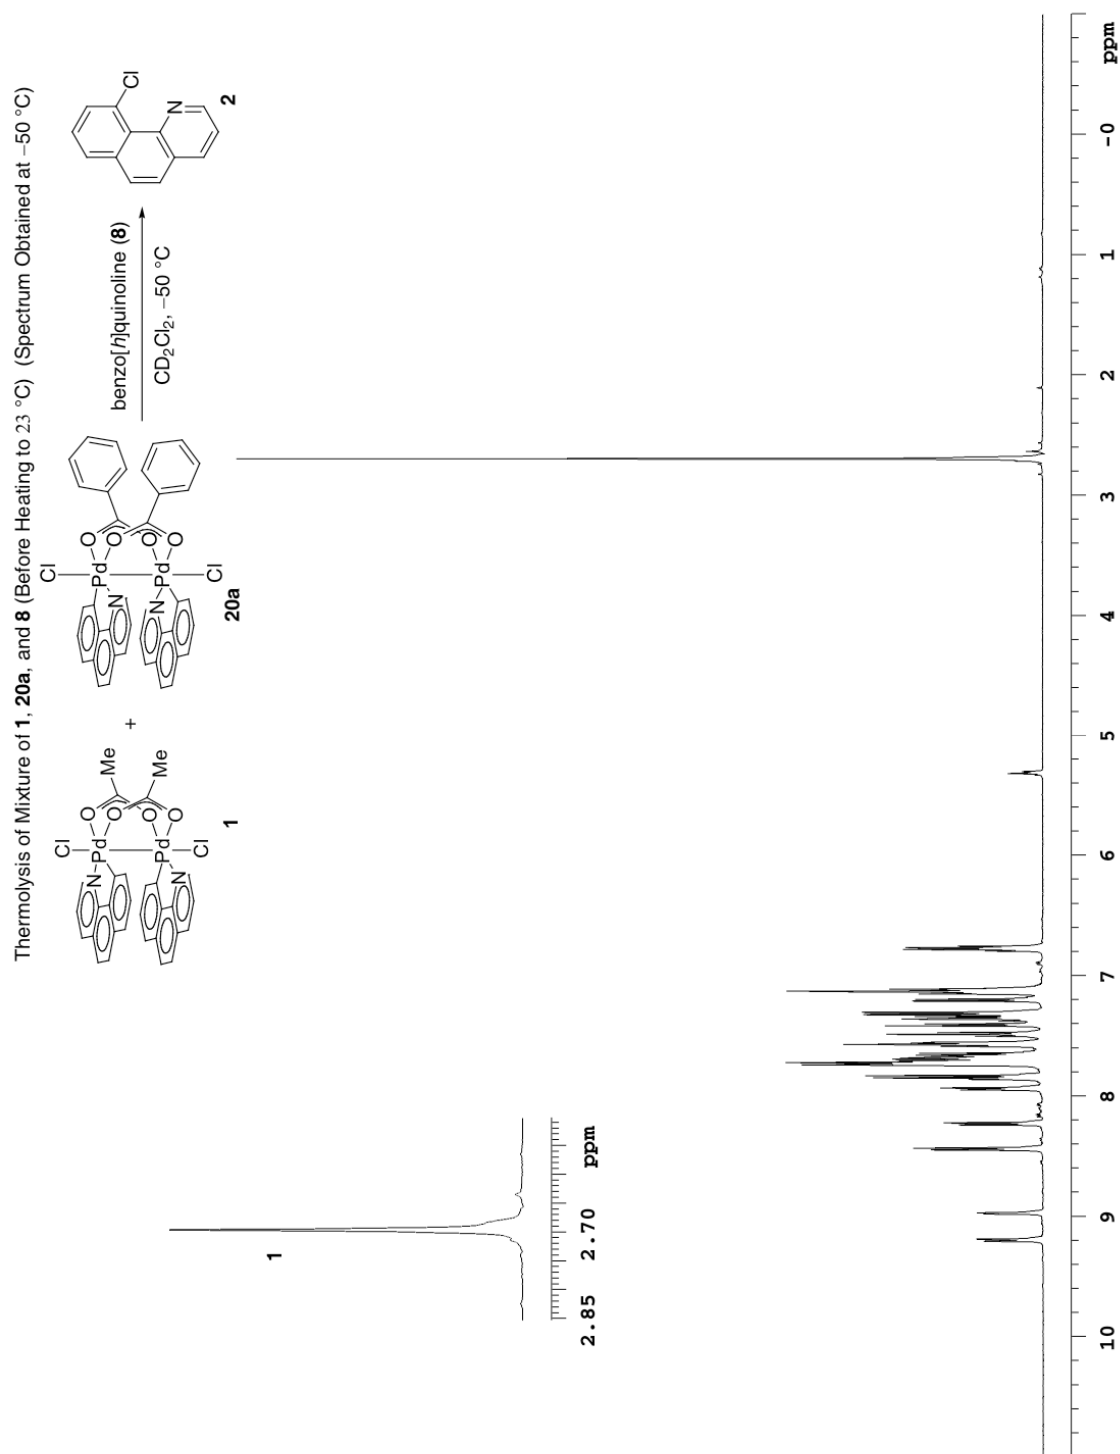

Thermolysis of Mixture of **1**, **20a**, and **8** (After Heating to 23 °C) (Spectrum Obtained at -50 °C)

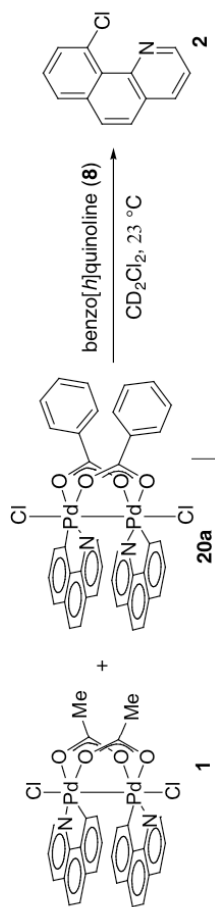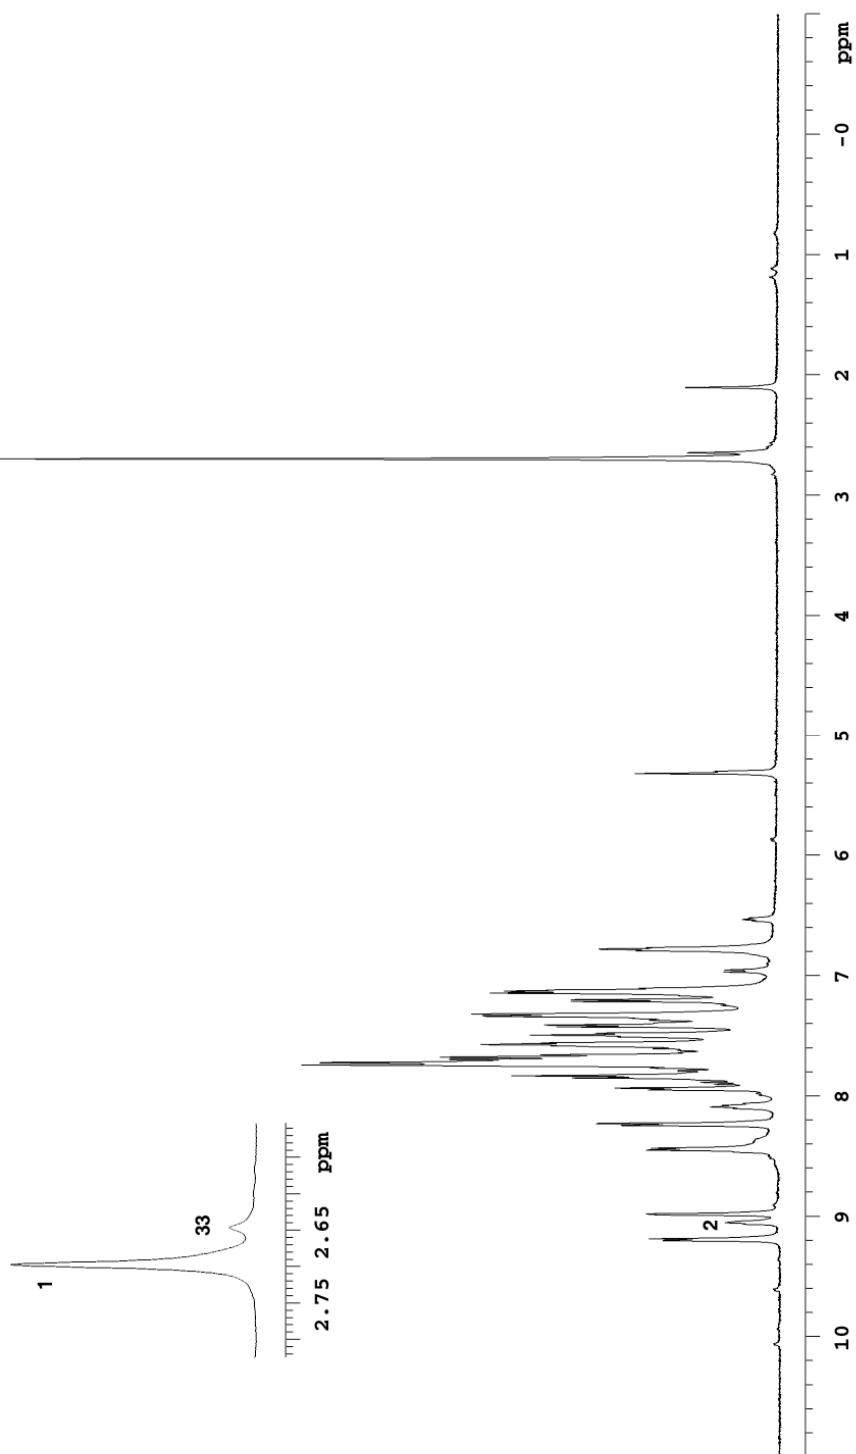



## Synthesis and Thermolysis of 34 (Data Pertaining to Eq 5)

### 1,3-Bis(2-methyl-2-cyanopropyl)benzene (S25)

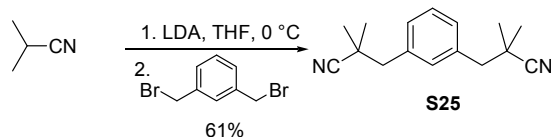

To a THF solution of LDA, prepared by treating *i*Pr<sub>2</sub>NH (8.00 mL, 57.0 mmol, 3.50 equiv) in THF (50 mL) with 2.70 M *n*-BuLi (15.8 mL, 42.7 mmol, 2.63 equiv) at 0 °C, was added isobutyronitrile (2.96 mL, 32.5 mmol, 2.00 equiv). After 10 minutes at 0 °C, xylylene dibromide (4.30 g, 16.3 mmol, 1.00 equiv) in THF (10 mL) was added. The reaction was allowed to stir at 0 °C for 20 minutes, at which time the solution was poured into 1 N HCl (100 mL). The phases were separated and the aqueous phase was extracted with EtOAc (3 × 40 mL). The organic phases were combined, washed with brine, and concentrated *in vacuo*. The residue was purified by chromatography on silica gel eluting with benzene to afford 2.40 g of the title compound as a pale yellow oil (61% yield).

$R_f = 0.18$  (benzene). <sup>1</sup>H-NMR (500 MHz, CDCl<sub>3</sub>, 23 °C,  $\delta$ ): 7.32 (dd,  $J = 8.1$  Hz,  $J = 7.8$  Hz, 1H), 7.23 (d,  $J = 1.5$  Hz, 1H), 7.18 (d,  $J = 10.2$  Hz, 2H), 2.82 (s, 4H), 1.36 (s, 12H). <sup>13</sup>C-NMR (125 MHz, CDCl<sub>3</sub>, 23 °C,  $\delta$ ): 135.85, 132.11, 129.21, 128.44, 124.69, 46.51, 33.59, 26.56. These spectroscopic data correspond to those reported in the literature.<sup>26</sup>

### $\alpha,\alpha',\alpha'',\alpha'''$ -Tetramethyl-1,3-benzenedipropionic acid (H<sub>2</sub>esp) (S26)

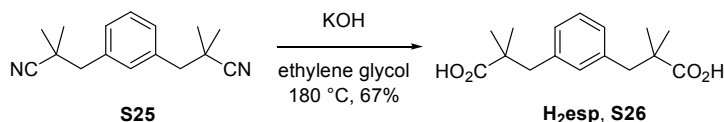

1,3-Bis(2-methyl-2-cyanopropyl)benzene (S25) (2.40 g, 10.0 mmol, 1.00 equiv) was dissolved in ethylene glycol (13 mL). KOH (2.81 g, 50.0 mmol, 2.50 equiv) was added and the reaction was heated to 180 °C. After six hours, the reaction mixture was cooled to room temperature and CHCl<sub>3</sub> (15 mL) and water (15 mL) were added. The aqueous layer was isolated and was acidified (pH = 1) with 6 N HCl. The aqueous phase was then extracted with EtOAc (3 × 60 mL). The organic phases were combined and washed sequentially with water (2 × 20 mL) and brine (2 × 20 mL) before being dried with Na<sub>2</sub>SO<sub>4</sub>. Solvent was removed *in vacuo* to afford 1.85 g of the title compound as a colorless solid (67% yield.)

<sup>1</sup>H-NMR (500 MHz, CDCl<sub>3</sub>, 23 °C,  $\delta$ ): 7.19 (t,  $J = 7.6$  Hz, 1H), 7.03 (s, 1H), 7.01 (t,  $J = 7.3$  Hz, 2H), 2.84 (s, 4H), 1.18 (s, 12H). <sup>13</sup>C-NMR (125 MHz, CDCl<sub>3</sub>, 23 °C,  $\delta$ ): 184.04, 137.32, 131.40, 128.70, 127.57, 46.13, 43.55, 24.39. These spectroscopic data correspond to those reported in the literature.<sup>27</sup>

**[Pd<sub>2</sub>(bhq)<sub>2</sub>]esp (34)**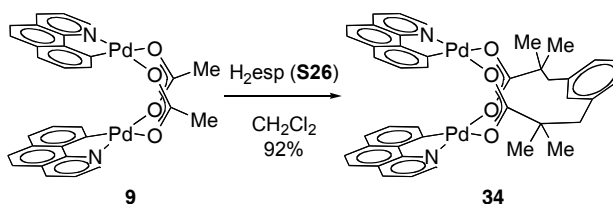

To a solution of benzo[*h*]quinolinyll palladium acetate dimer (**9**) (388 mg, 0.565 mmol, 1.00 equiv) in  $CH_2Cl_2$  (10 mL) at 23 °C was added  $\alpha, \alpha, \alpha', \alpha'$ -tetramethyl-1,3-benzenedipropionic acid ( $H_2esp$ , **S26**) (157 mg, 0.565 mmol, 1.00 eq). After stirring for 30 minutes, solvent was removed *in vacuo*. Trituration with  $Et_2O$  (5 mL) and isolation by filtration afforded 438 mg of the title compound as a yellow solid (92% yield) in a 20:1 ratio of isomers (benzo[*h*]quinolinyll ligand head to tail vs. head to head).

$R_f = 0.29$  (hexanes/ $EtOAc$  7:3 (v/v)). Melting Point: >250 °C.  $^1H$ -NMR (500 MHz,  $CDCl_3$ , 23 °C,  $\delta$ ): Major Isomer: 7.79 (dd,  $J = 5.4$  Hz,  $J = 1.5$  Hz, 2H), 7.52 (s, 1H), 7.44 (dd,  $J = 7.8$  Hz,  $J = 1.0$  Hz, 2H), 7.23–7.14 (m, 7H), 7.07 (d,  $J = 7.3$  Hz, 2H), 7.00 (dd,  $J = 7.3$  Hz,  $J = 1.5$  Hz, 2H), 6.96 (d,  $J = 8.8$  Hz, 2H), 6.50 (dd,  $J = 7.8$  Hz,  $J = 4.9$  Hz, 2H), 2.99 (d,  $J = 12.2$  Hz, 2H), 2.88 (d,  $J = 12.2$  Hz, 2H), 1.50 (s, 6H), 1.39 (s, 6H). Minor Isomer: 8.07 (dd,  $J = 6.3$  Hz,  $J = 1.5$  Hz, 2H), 7.71 (dd,  $J = 7.8$  Hz,  $J = 1.5$  Hz, 2H), 7.50 (s, 1H), 6.93–6.87 (m, 7H), 6.78 (d,  $J = 6.8$  Hz, 2H), 1.48 (s, 6H), 1.41 (s, 6H).  $^{13}C$ -NMR (125 MHz,  $CDCl_3$ , 23 °C,  $\delta$ ): Major Isomer: 186.82, 153.06, 149.08, 148.37, 139.80, 138.76, 135.01, 132.05, 131.42, 128.13, 127.93, 127.41, 127.38, 126.68, 124.65, 122.64, 121.59, 119.72, 47.62, 46.19, 27.12, 26.67. UV-VIS Spectroscopy ( $CH_2Cl_2$ , 23 °C): 425 nm ( $\epsilon = 2.07 \times 10^3$  M<sup>-1</sup> cm<sup>-1</sup>); 381 nm ( $\epsilon = 4.13 \times 10^3$  M<sup>-1</sup> cm<sup>-1</sup>); 277 nm ( $\epsilon = 1.97 \times 10^4$  M<sup>-1</sup> cm<sup>-1</sup>). Mass Spectrometry: LRMS-FIA (m/z): calcd for  $[C_{42}H_{36}N_2O_4Pd_2+H]$ , 845.1. Found, 845.0. Anal: calcd for  $C_{42}H_{36}N_2O_4Pd_2$ : C, 59.66; H, 4.29; N, 3.31; found: C, 59.60; H, 4.31; N, 3.23.

**[Pd<sub>2</sub>(bhq)<sub>2</sub>Cl<sub>2</sub>]esp (35)**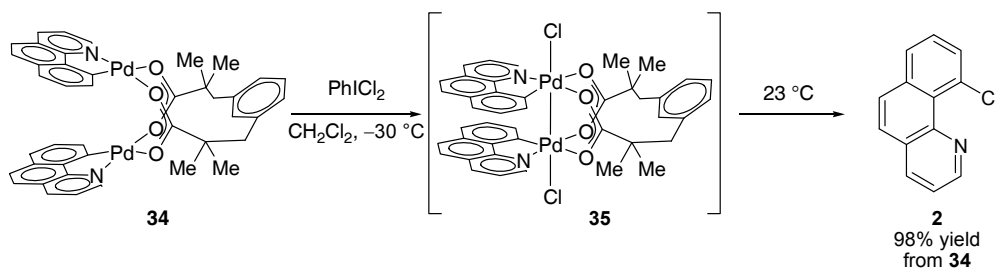

To  $[Pd_2(bhq)_2]esp$  complex (**34**) (73.4 mg,  $8.68 \times 10^{-5}$  mol, 1.00 equiv) in  $CH_2Cl_2$  (5 mL) was added iodobenzene dichloride (23.9 mg,  $8.68 \times 10^{-5}$  mol, 1.00 eq) at -30 °C. The reaction mixture immediately turned from pale yellow to dark red. The formation of  $[Pd_2(bhq)_2Cl_2]esp$  (**35**) as a 10:1 mixture of isomers (benzo[*h*]quinolinyll ligand head to tail vs. head to head) was confirmed spectroscopically (see below); compound **35** was not isolated. The reaction was allowed to warm to room temperature and was

stirred for 6 hours, at which time the reaction mixture was yellow. Solvent was removed *in vacuo* and the residue was purified by chromatography on silica gel eluting with hexanes / diethyl ether (9:1) to afford 18.2 mg of **2** as a colorless solid (98% yield).

Characterization of  $[\text{Pd}_2(\text{bhq})_2\text{Cl}_2]\text{esp}$  (**35**):

$^1\text{H-NMR}$  (500 MHz,  $\text{CDCl}_3$ ,  $-30\text{ }^\circ\text{C}$ ,  $\delta$ ): Major Isomer: 7.86 (d,  $J = 5.4\text{ Hz}$ , 2H), 7.77 (s, 1H), 7.70 (dd,  $J = 8.3\text{ Hz}$ ,  $J = 1.0\text{ Hz}$ , 2H), 7.28–7.21 (m, 8H), 7.08 (dd,  $J = 7.3\text{ Hz}$ ,  $J = 1.0\text{ Hz}$ , 2H), 7.03 (d,  $J = 8.8\text{ Hz}$ , 2H), 6.78 (dd,  $J = 7.8\text{ Hz}$ ,  $J = 5.4\text{ Hz}$ , 2H), 3.16 (d,  $J = 12.7\text{ Hz}$ , 2H), 3.11 (d,  $J = 12.7\text{ Hz}$ , 2H), 1.60 (s, 6H), 1.59 (s, 6H). Minor Isomer: 8.17 (d,  $J = 7.3\text{ Hz}$ , 2H), 8.04 (d,  $J = 5.4\text{ Hz}$ , 2H), 7.80 (s, 1H), 7.49 (dd,  $J = 8.3\text{ Hz}$ ,  $J = 8.3\text{ Hz}$ , 2H), 7.00 (dd,  $J = 8.8\text{ Hz}$ ,  $J = 8.8\text{ Hz}$ , 2H).  $^{13}\text{C-NMR}$  (125 MHz,  $\text{CDCl}_3$ ,  $-30\text{ }^\circ\text{C}$ ,  $\delta$ ): 193.16, 155.44, 149.12, 148.42, 138.12, 136.43, 135.75, 133.26, 131.35, 130.39, 128.39, 127.71, 127.43, 126.34, 125.91, 124.14, 123.93, 122.08, 47.58, 47.13, 26.67, 26.44. UV-VIS Spectroscopy ( $\text{CH}_2\text{Cl}_2$ ,  $0\text{ }^\circ\text{C}$ ): 570 nm ( $\epsilon = 3.41 \times 10^3\text{ M}^{-1}\text{ cm}^{-1}$ ); 418 nm ( $\epsilon = 2.26 \times 10^4\text{ M}^{-1}\text{ cm}^{-1}$ ); 277 nm ( $\epsilon = 3.54 \times 10^4\text{ M}^{-1}\text{ cm}^{-1}$ ).

Compound **2** obtained from this procedure is spectroscopically identical to that reported above.

#### Determination of $\text{H}_2\text{esp}$ (**S26**) vs. AcOH Equilibrium Constant

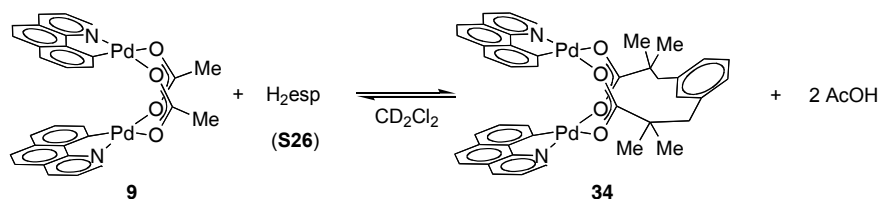

To  $[\text{Pd}_2(\text{bhq})_2]\text{esp}$  complex (**34**) (9.0 mg,  $1.1 \times 10^{-5}\text{ mol}$ , 1.0 equiv) in  $\text{CD}_2\text{Cl}_2$  (0.7 mL) was added AcOH (10  $\mu\text{L}$  mg,  $1.8 \times 10^{-4}\text{ mol}$ , 16 equiv) at  $23\text{ }^\circ\text{C}$ . The  $^1\text{H NMR}$  spectrum was obtained after 5 minutes, 30 minutes, and 90 minutes and showed no change over time in the relative intensities of signals attributable to **9**, **S26**, **34**, and AcOH. Diagnostic peaks for **34** (1.48 and 1.41 ppm), **9** (2.38 ppm),  $\text{H}_2\text{esp}$  (**S26**) (1.18 ppm), and AcOH (2.10 ppm) were used to measure the relative amount of the four species. The integration of each of these signals was adjusted for the number of protons represented by that signal, and the equilibrium constant was calculated using the following equation:

$$K_{\text{eq}} = \frac{[\text{34}][\text{AcOH}]^2}{[\text{9}][\text{S26}]}$$

Evaluating this expression,  $K_{\text{eq}} = 1.2 \times 10^5$ .

## Evaluation of the Relative Rates of Dissociation of Acetate and esp-Bridged Complexes

### Exchange Between **9** and **S23**

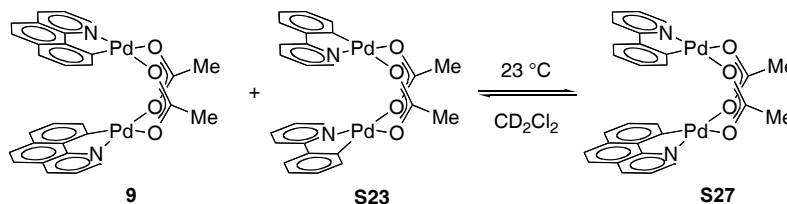

A solution of benzo[*h*]quinolinylligand palladium acetate dimer (**9**) (10.3 mg,  $1.50 \times 10^{-5}$  mol, 1.0 equiv) in  $\text{CD}_2\text{Cl}_2$  (0.7 mL) was prepared. At 23 °C a solution of 2-phenylpyridyl palladium acetate dimer (**S23**) (9.6 mg,  $1.5 \times 10^{-5}$  mol, 1.0 equiv) in  $\text{CD}_2\text{Cl}_2$  (0.7 mL) was added. A  $^1\text{H-NMR}$  was obtained immediately upon preparing the solution (2 min following combination of the two solutions). The spectrum contained only peaks assigned to **9**, **S23**, and a third species, **S27**. The  $^1\text{H NMR}$  spectrum of the mixture was obtained again following 3 h at 23 °C and showed no change in the integrations of the peaks attributable to **9**, **S23**, and **S27**.

### Exchange Between **34** and **S23**

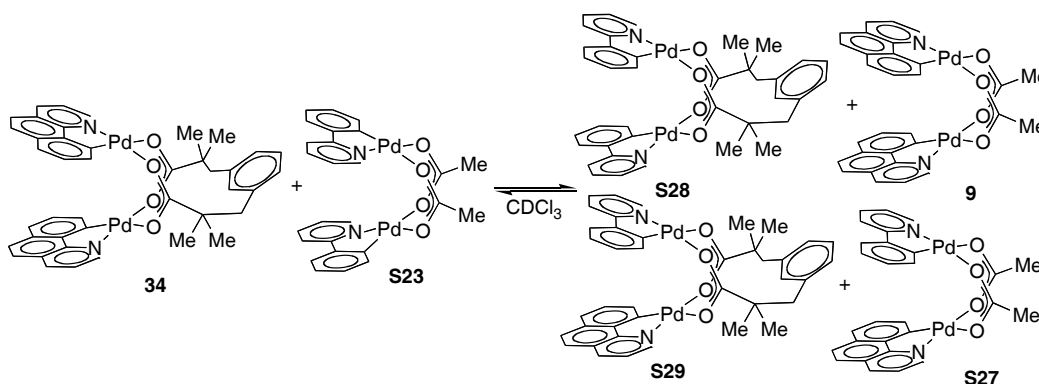

A solution of 2-phenylpyridyl palladium acetate dimer (**S23**) (4.2 mg,  $6.6 \times 10^{-6}$  mol, 1.0 equiv) and complex **34** (5.6 mg,  $6.6 \times 10^{-6}$  mol, 1.0 equiv) in  $\text{CDCl}_3$  (0.7 mL) was prepared. A  $^1\text{H-NMR}$  was obtained immediately upon preparation of the solution. The spectrum contained only peaks assigned to complexes **34** and **S23**. The solution was stirred for 1 h at 23 °C. A  $^1\text{H-NMR}$  spectrum was obtained and, based on the integration of the signals for the bridging acetate ligands in **S23** as compared to the residual proton signal in  $\text{CDCl}_3$  it was determined that <2% exchange had occurred during this time. The solution was heated for 4 h at 50 °C.  $^1\text{H-NMR}$  analysis after this period revealed that 68% exchange had occurred under these conditions. The percentages of scrambling are based on an equilibrated samples, obtained after prolonged (>24 h) heating. The  $^1\text{H-NMR}$  after this time contains only peaks assignable to compounds **34** and **S23** as well as two new compounds.

### Comparison of Acetate and esp-Bridged Complexes

In 2 minutes, scrambling between **9** and **S23** was complete. In 1 h, 2% scrambling between **34** and **S23** was observed. Assuming a simplified model of percent scrambling as a linear function of time, **34** undergoes dimer monomer cleavage at least 1500 times slower than **9**. This approximation is conservative estimate as the rate of cleavage of **34** was assayed using an initial rate (2% scrambling) and the rate of cleavage of **9** was assayed following complete scrambling.

### Comparison of variable temperature <sup>1</sup>H NMR spectra of **9** and **34**

Qualitative information concerning the relative fluxionalities of **9** and **34** can be obtained by examining the <sup>1</sup>H NMR spectra of **9** and **34** at elevated temperatures. These experiments are outlined below.

### Temperature Dependent <sup>1</sup>H NMR of **9** in Presence of Benzo[*h*]quinoline (**8**)

A solution of benzo[*h*]quinoline (**8**) (13 mg,  $7.3 \times 10^{-5}$  mol, 1.0 equiv) and Pd(OAc)<sub>2</sub> (1.6 mg,  $7.1 \times 10^{-6}$  mol, 0.10 equiv) in CD<sub>3</sub>CN (0.7 mL) was prepared. A <sup>1</sup>H NMR of the solution was obtained at 23 °C. The sample was warmed to 80 °C at which temperature a <sup>1</sup>H NMR was obtained. The sample was subsequently cooled to 23 °C at which temperature the <sup>1</sup>H NMR was observed again. The spectrum exhibits temperature-dependent reversible line broadening for the signals corresponding to **9** while no line broadening is observed for the signals corresponding to exogenous benzo[*h*]quinoline (**8**).

### Temperature Dependent <sup>1</sup>H NMR of **33** in Presence of Benzo[*h*]quinoline (**8**)

A solution of benzo[*h*]quinoline (**8**) (16 mg,  $8.9 \times 10^{-5}$  mol, 1.0 equiv) and complex **34** (5.0 mg,  $5.9 \times 10^{-6}$  mol, 0.067 equiv) in CD<sub>3</sub>CN (0.7 mL) was prepared. A <sup>1</sup>H NMR of the solution was obtained at 23 °C. The sample was warmed to 80 °C at which temperature a <sup>1</sup>H NMR was obtained. The sample was subsequently cooled to 23 °C at which temperature the <sup>1</sup>H NMR was observed again. No change in any signal was observed with changing temperature.

### Rate of C–Cl Reductive Elimination from esp-Bridged **35**

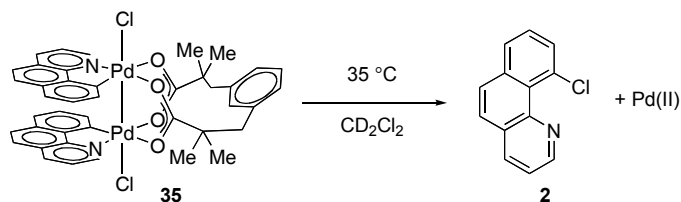

Solutions (20 mM) of compound **34** and PhICl<sub>2</sub> in CD<sub>2</sub>Cl<sub>2</sub> were prepared and stored at –30 °C. An NMR tube was purged with N<sub>2</sub> and cooled to –45 °C. Compound **34** in CD<sub>2</sub>Cl<sub>2</sub> (300 μL) and PhICl<sub>2</sub> in CD<sub>2</sub>Cl<sub>2</sub> (300 μL) were combined. <sup>1</sup>H NMR spectra were obtained; the evolution of **2** was monitored by the <sup>1</sup>H NMR signal at 9.12 ppm. These signals were integrated relative the residual proton signal from CD<sub>2</sub>Cl<sub>2</sub>. These ratios were converted to concentrations based on the integration of a 20 mM solution of **2** in

CD<sub>2</sub>Cl<sub>2</sub>. Since evolution of product was measured, linear natural log plots were obtained by using an infinite time point set to 100% yield (20 mM in **2**). The reactions were followed to greater than 3 half-lives. Data were fitted to a first order regression; plot, slope, and R<sup>2</sup> value are reported below.

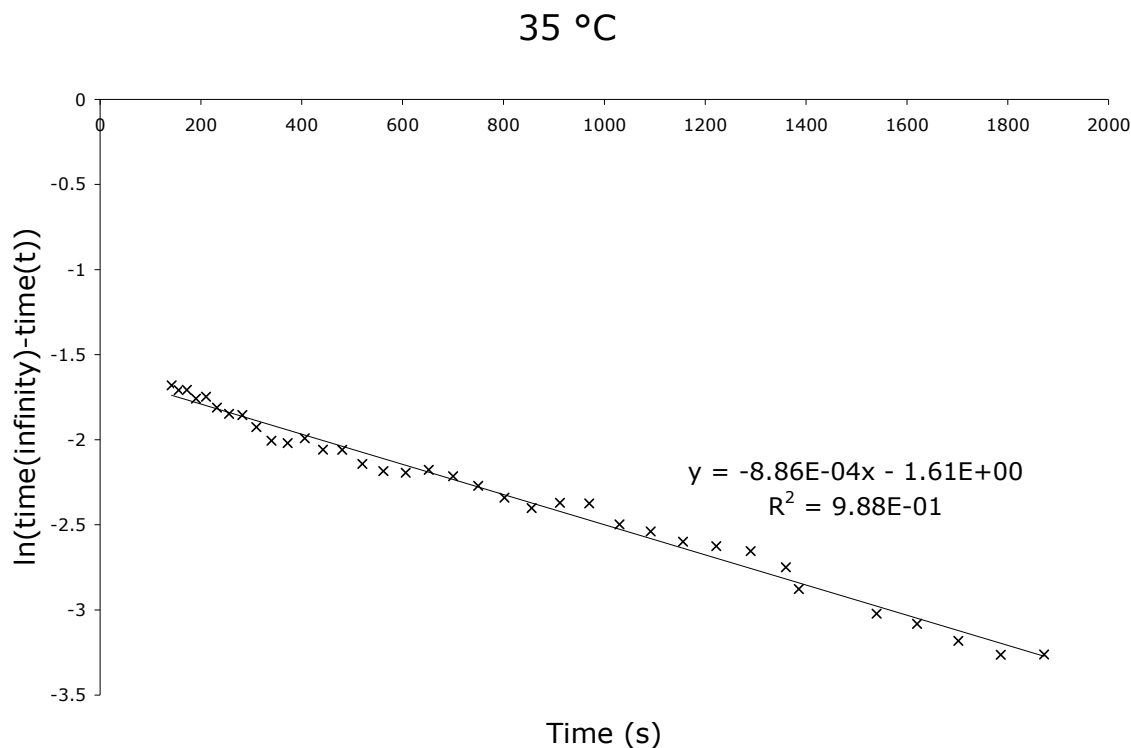

Comparison of the rate constant for C–Cl reductive elimination from **1** ( $k = 1.33 \times 10^{-2} \text{ s}^{-1}$ ) and **35** ( $k = 8.33 \times 10^{-2} \text{ s}^{-1}$ ) shows that reductive elimination from **1** proceeds 16 times faster than from **35**. This is consistent with our Hammett analysis of the bridging carboxylate ligands, which revealed that electron-deficient carboxylate bridged complexes undergo reductive elimination more rapidly than electron-rich carboxylates. The relative rates may also be a reflection of differing ligand rigidities of bridging acetate and bridging esp ligands.

## References

- (1) Pangborn, A. B.; Giardello, M. A.; Grubbs, R. H.; Rosen, R. K.; Timmers, F. J. *Organometallics* **1996**, *15*, 1518–1520.
- (2) Taylor, R. T.; Stevenson, T. A. *Tetrahedron Lett.* **1988**, *29*, 2033–2036.
- (3) Dick, A. R.; Hull, K. L.; Sanford, M. S. *J. Am. Chem. Soc.* **2004**, *126*, 2300–2301.
- (4) Rotzoll, S.; Ullah, E.; Görls, H.; Fischer, C.; Langer, P. *Tetrahedron* **2007**, *63*, 2647–2656.
- (5) Rajput, J.; Moss, J. R.; Hutton, A. T.; Hendricks, D. T.; Arendse, C. E.; Imrie, C. *J. Organomet. Chem.* **2004**, *689*, 1553–1568.
- (6) Zhang, Y. H.; Shi, B. F.; Yu, J. Q. *J. Am. Chem. Soc.* **2009**, *131*, 5072–5074.
- (7) Hartwell, G. E.; Lawrence, R. V.; Smas, M. J. *J. Chem. Soc. Chem. Comm.* **1970**, 912.
- (8) Cockburn, B. N.; Howe, D. V.; Keating, T.; Johnson, B. F. G.; Lewis, J. *J. Chem. Soc. Dalton* **1973**, 404–410.
- (9) Barltrop, J. A.; Macphee, K. E. *J. Chem. Soc.* **1952**, 638–642.
- (10) Furuya, T.; Benitez, D.; Tkatchouk, E.; Strom, A. E.; Tang, P.; Goddard, W. A., III; Ritter, T. *J. Am. Chem. Soc.* **2010**, *132*, 3793–3807.

- (11) Constable, E. C.; Thompson, A.; Leese, T. A.; Reese, D. G. F.; Tocher, D. A. *Inorg. Chim. Acta* **1991**, *182*, 93–100.
- (12) Dick, A. R.; Kampf, J. W.; Sanford, M. S. *J. Am. Chem. Soc.* **2005**, *127*, 12790–12791.
- (13) Yu, W. Y.; Sit, W. N.; Zhou, Z. Y.; Chan, A. S. C. *Org. Lett.* **2009**, *11*, 3174–3177.
- (14) Staab, H. A.; Rohr, W.; Graf, F. *Chem. Ber.* **1965**, *98*, 1122–1127.
- (15) Zhao, Y.; Truhlar, D. G. *Acc. Chem. Res.* **2008**, *41*, 157–167.
- (16) Jaguar 7.6, Schrodinger, LLC, New York, NY (2006).
- (17) Hay, P. J.; Wadt, W. R. *J. Chem. Phys.* **1985**, *82*, 299–310.
- (18) Martin, J. M. L.; Sundermann, A. *J. Chem. Phys.* **2001**, *114*, 3408–3420.
- (19) Krishnan, R.; Binkley, J. S.; Seeger, R.; Pople, J. A. *J. Chem. Phys.* **1980**, *72*, 650–654.
- (20) Frisch, M. J.; Pople, J. A.; Binkley, J. S. *J. Chem. Phys.* **1984**, *80*, 3265–3269.
- (21) Tannor, D. J.; Marten, B.; Murphy, R.; Friesner, R. A.; Sitkoff, D.; Nicholls, A.; Ringnalda, M.; Goddard, W. A., III; Honig, B. *J. Am. Chem. Soc.* **1994**, *116*, 11875–11882.
- (22) Weinhold, F.; Landis, C. R. *Valency and Bonding: A Natural Bond Orbital Donor-Acceptor Perspective*; Cambridge University Press, 2005.
- (23) Reed, A. E.; Curtiss, L. A.; Weinhold, F. *Chem. Rev.* **1988**, *88*, 899–926.
- (24) *NBO 5.0*. Glendening, E. D.; Badenhoop, J. K.; Reed, A. E.; Carpenter, J. E.; Bohmann, J. A.; Morales, C. M.; Weinhold, F.; Theoretical Chemistry Institute, University of Wisconsin, Madison (2001).
- (25) Bondi, A. *J. Phys. Chem.* **1964**, *68*, 441–451.
- (26) Fukazawa, Y.; Usui, S.; Tanimoto, K.; Hirai, Y. *J. Am. Chem. Soc.* **1994**, *116*, 8169–8175.
- (27) Espino, C. G.; Fiori, K. W.; Kim, M.; Du Bois, J. *J. Am. Chem. Soc.* **2004**, *126*, 15378–15379.

**Appendix A: NMR Data**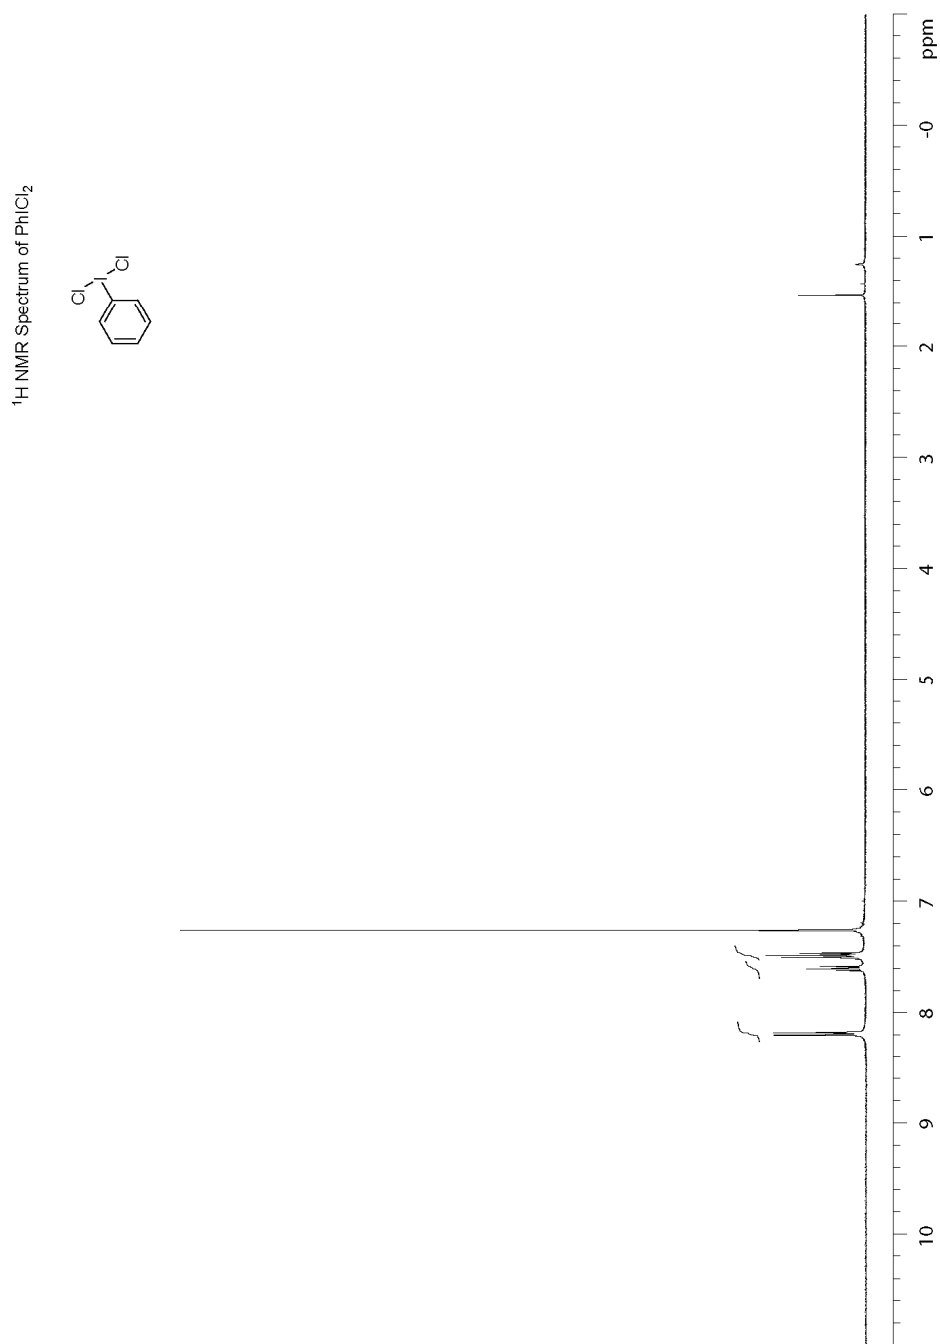

<sup>1</sup>H NMR spectrum of PhICl<sub>2</sub> in CDCl<sub>3</sub> at 23 °C.



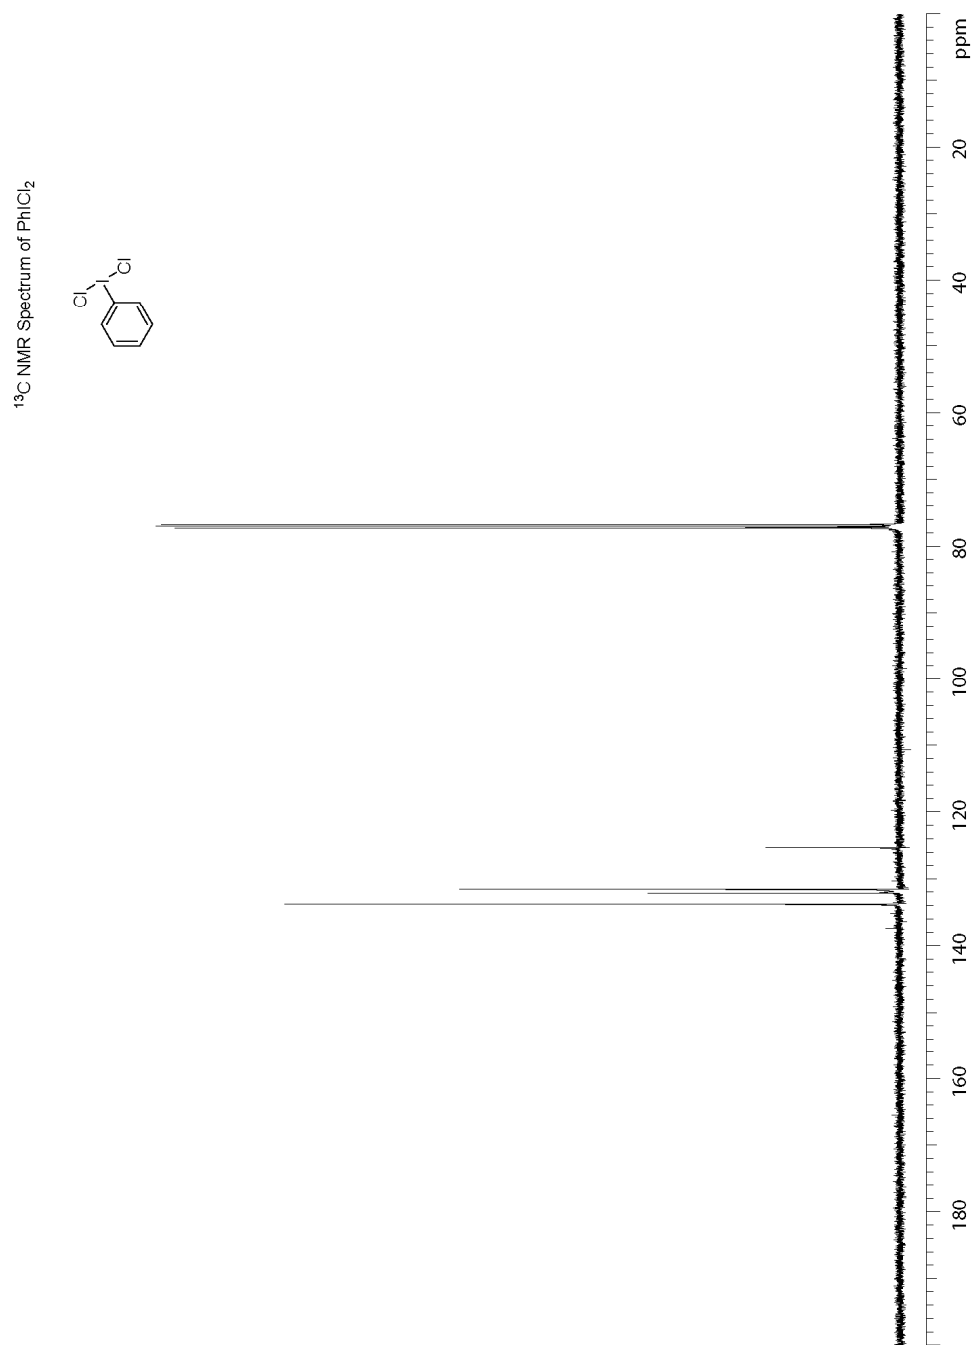

<sup>13</sup>C NMR spectrum of PhCl<sub>2</sub> in CDCl<sub>3</sub> at 23 °C.

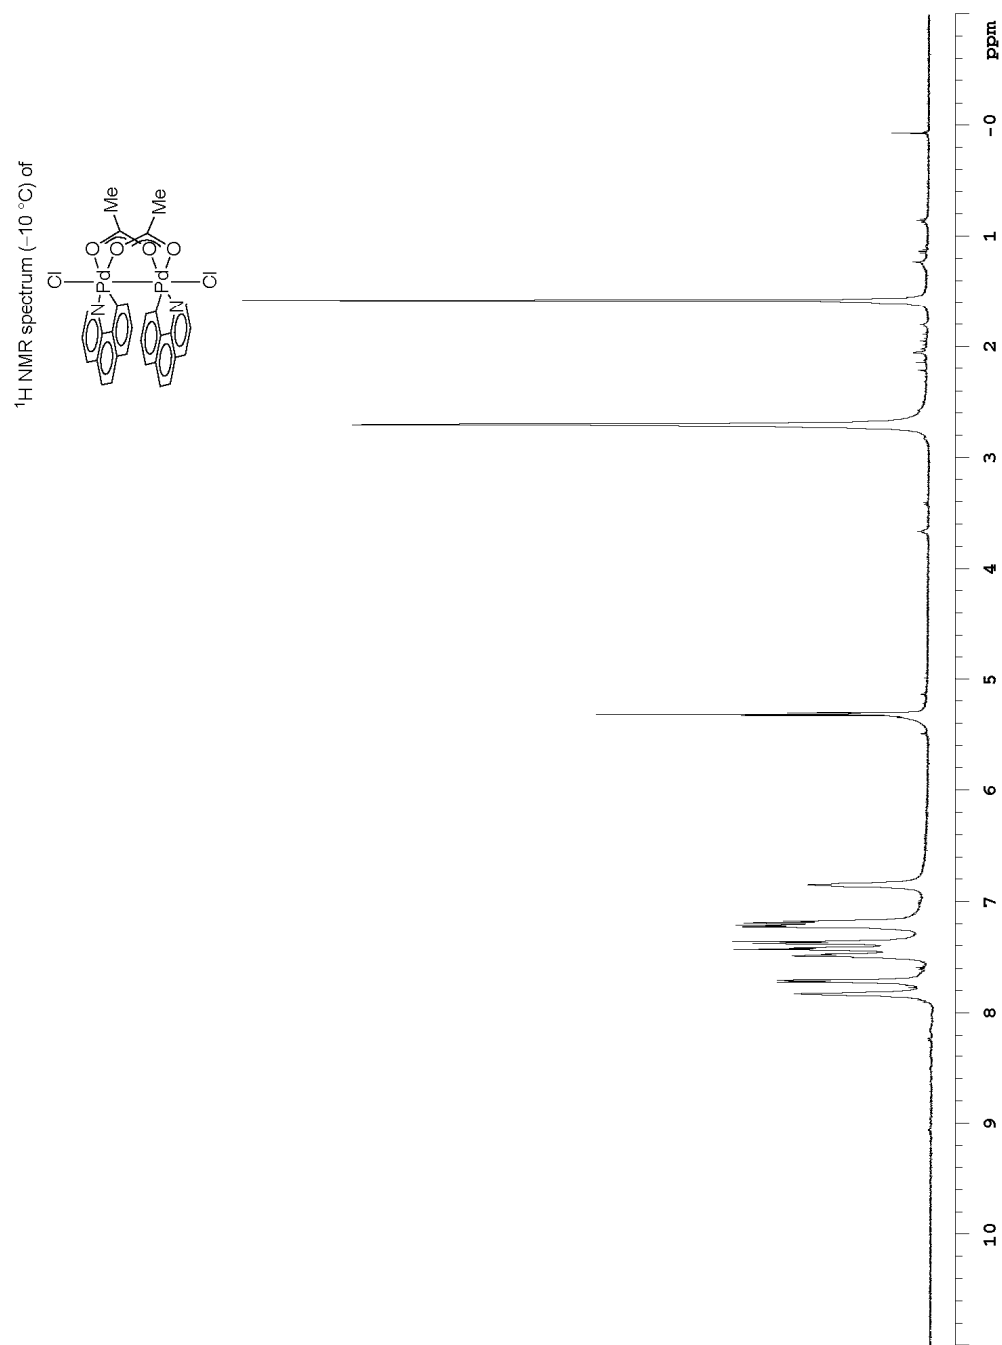

<sup>1</sup>H NMR spectrum of **1** in CD<sub>2</sub>Cl<sub>2</sub> at −10 °C.

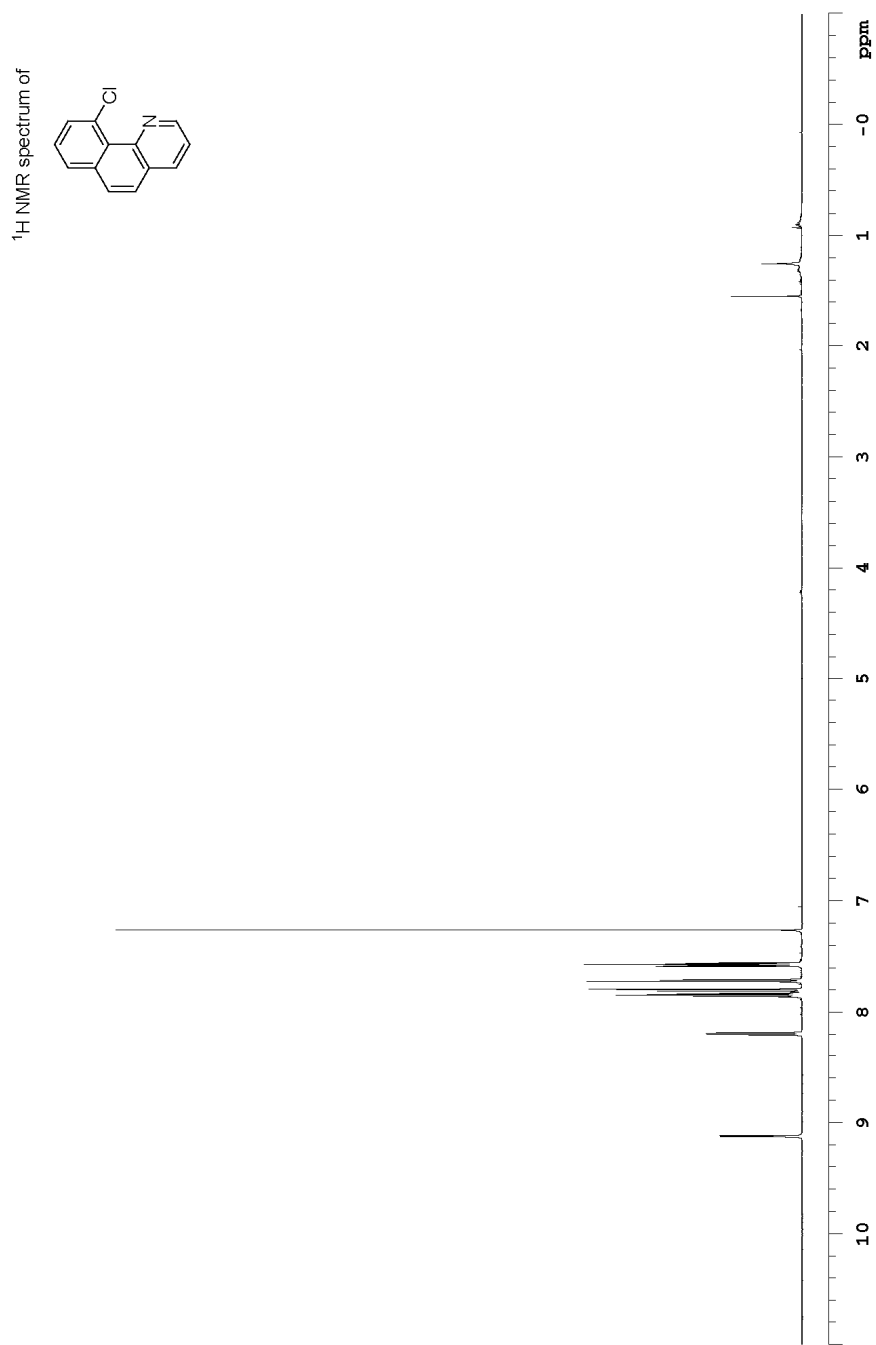

<sup>1</sup>H NMR spectrum of **2** in CDCl<sub>3</sub> at 23 °C.

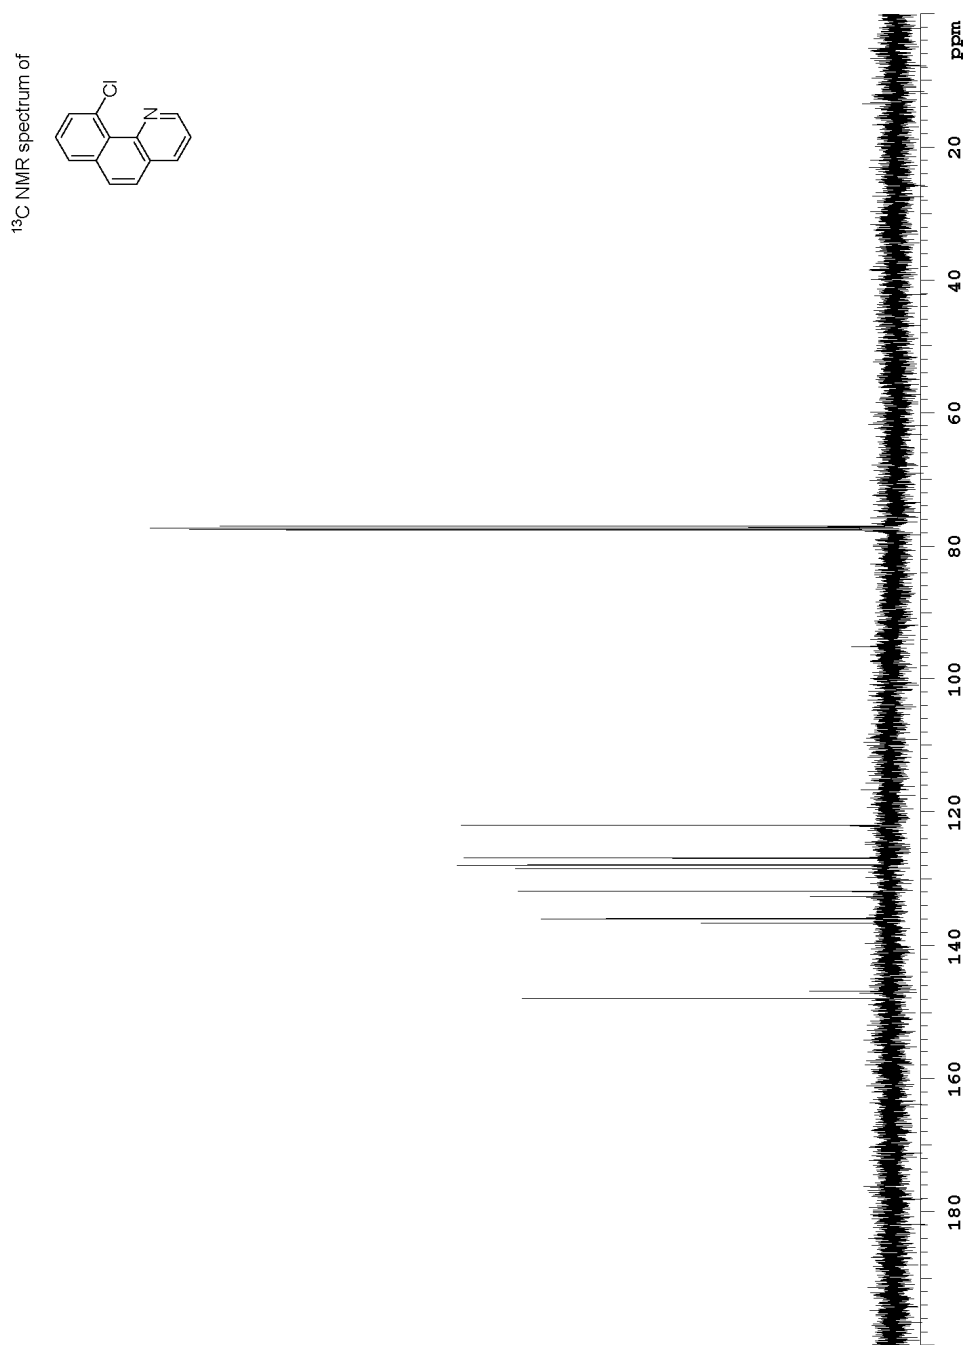

<sup>13</sup>C NMR spectrum of **2** in CDCl<sub>3</sub> at 23 °C.

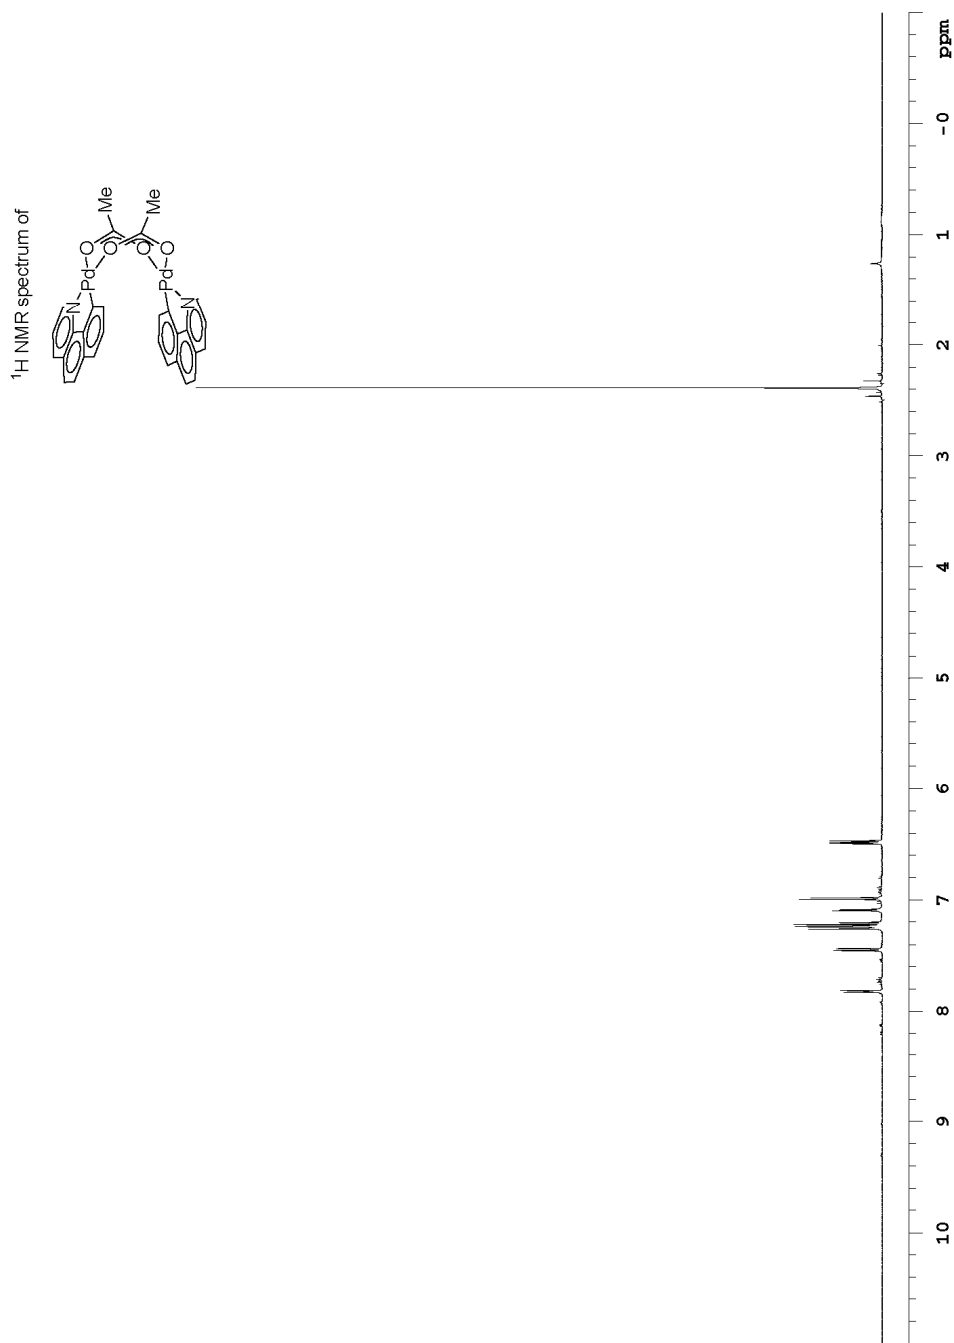

<sup>1</sup>H NMR spectrum of **9** in CDCl<sub>3</sub> at 23 °C.

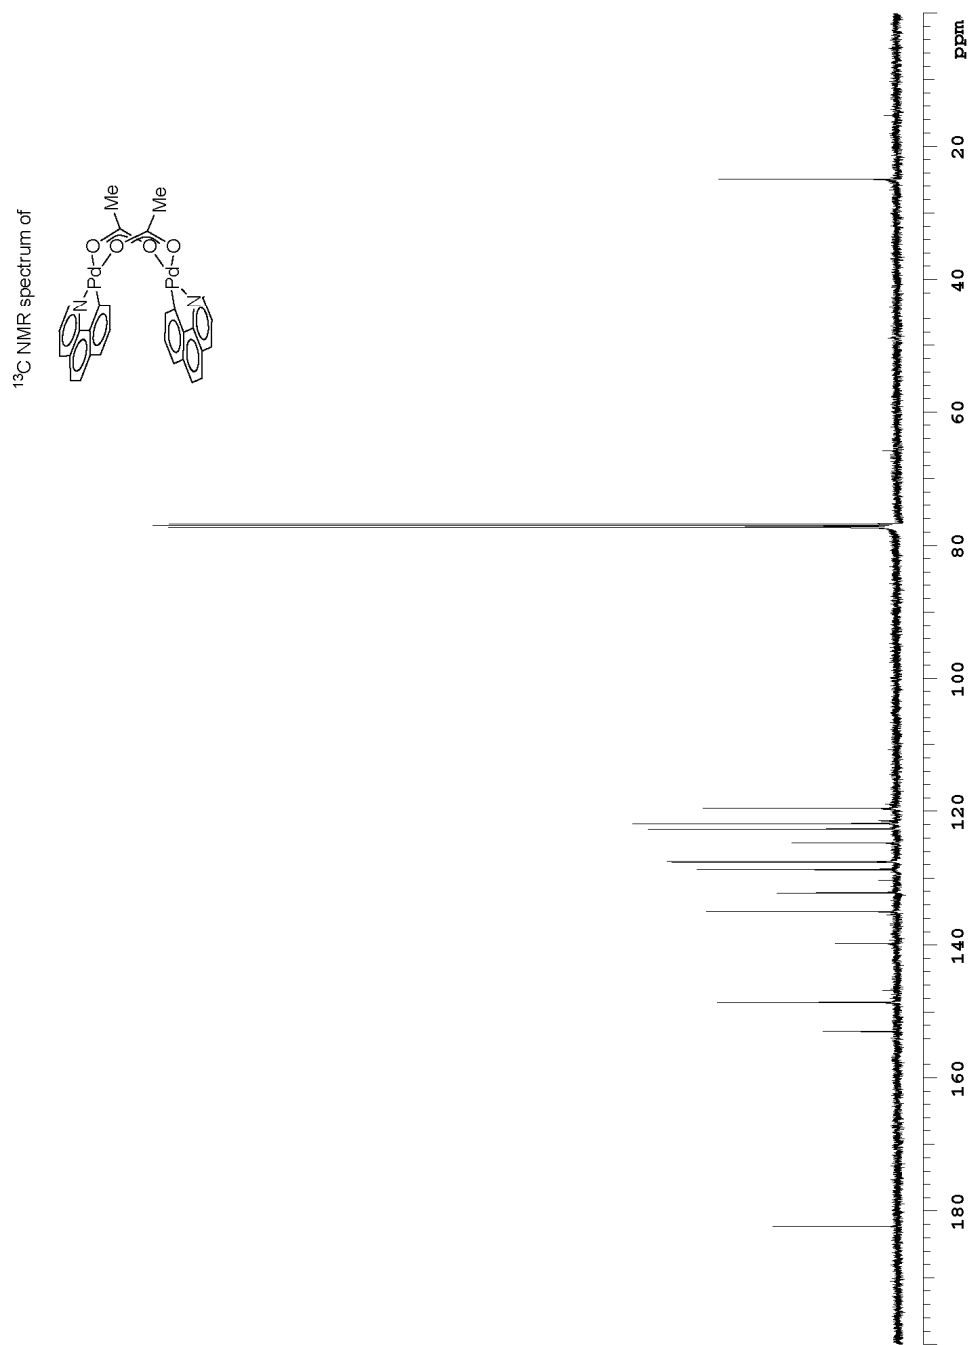

<sup>13</sup>C NMR spectrum of **9** in CDCl<sub>3</sub> at 23 °C.

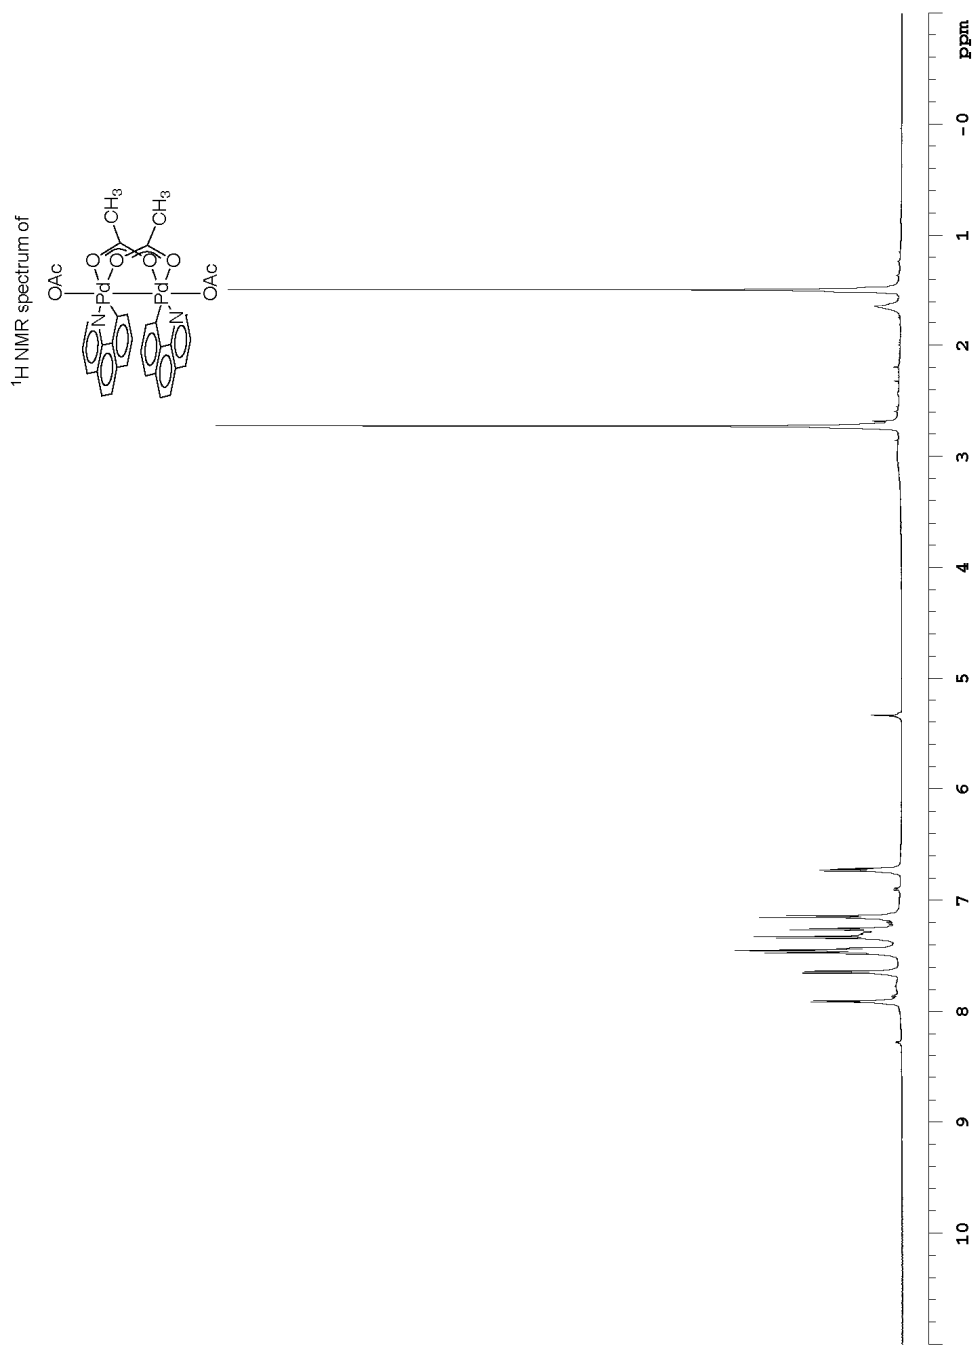

<sup>1</sup>H NMR spectrum of **10** in CD<sub>2</sub>Cl<sub>2</sub> at -30 °C.

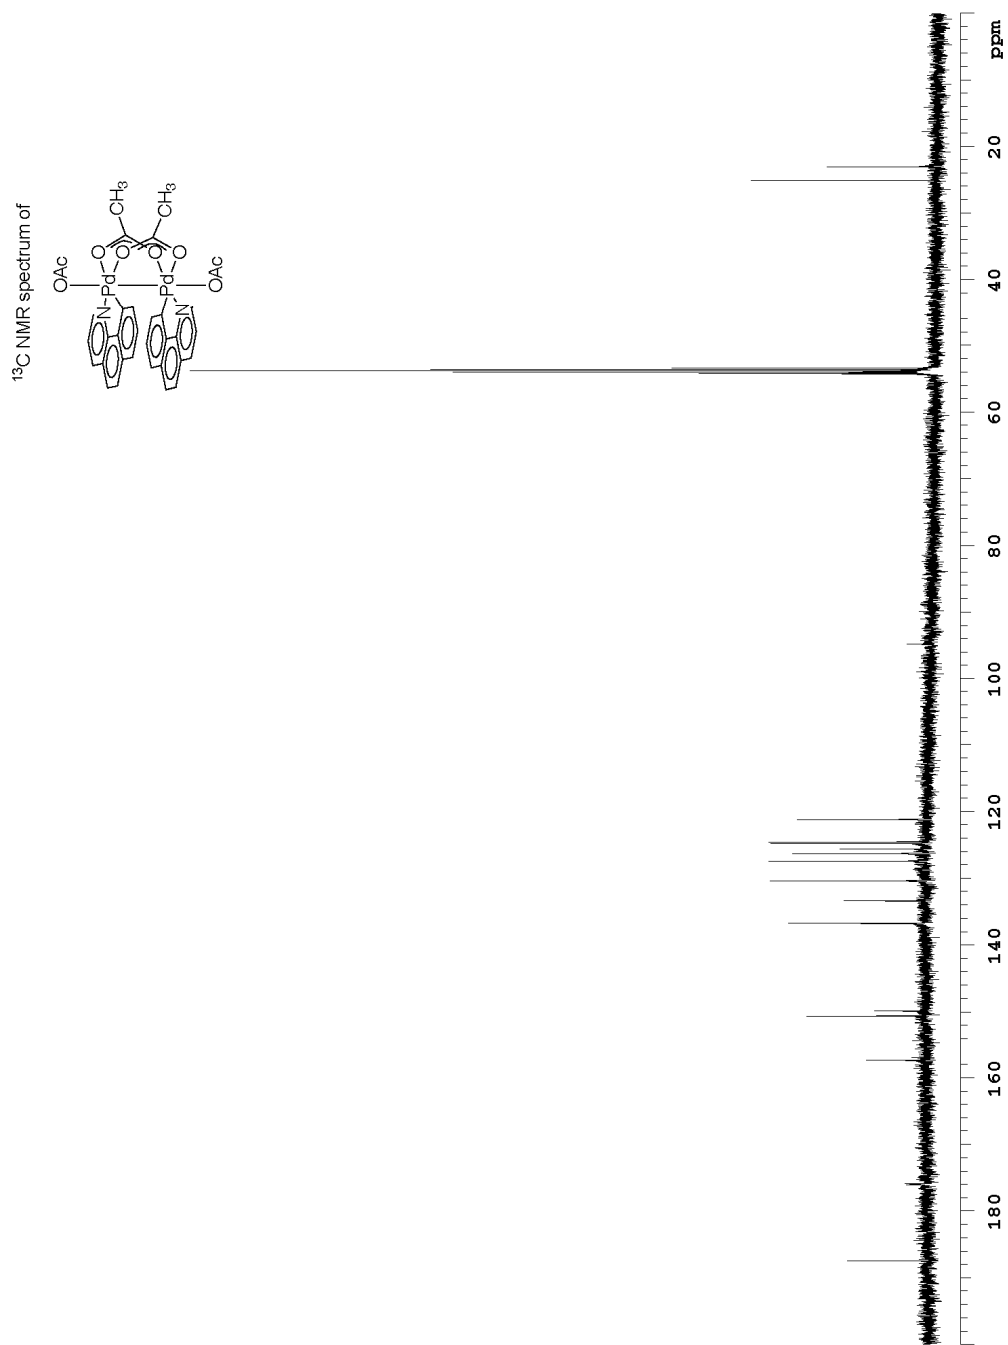

<sup>13</sup>C NMR spectrum of **10** in CD<sub>2</sub>Cl<sub>2</sub> at -30 °C.



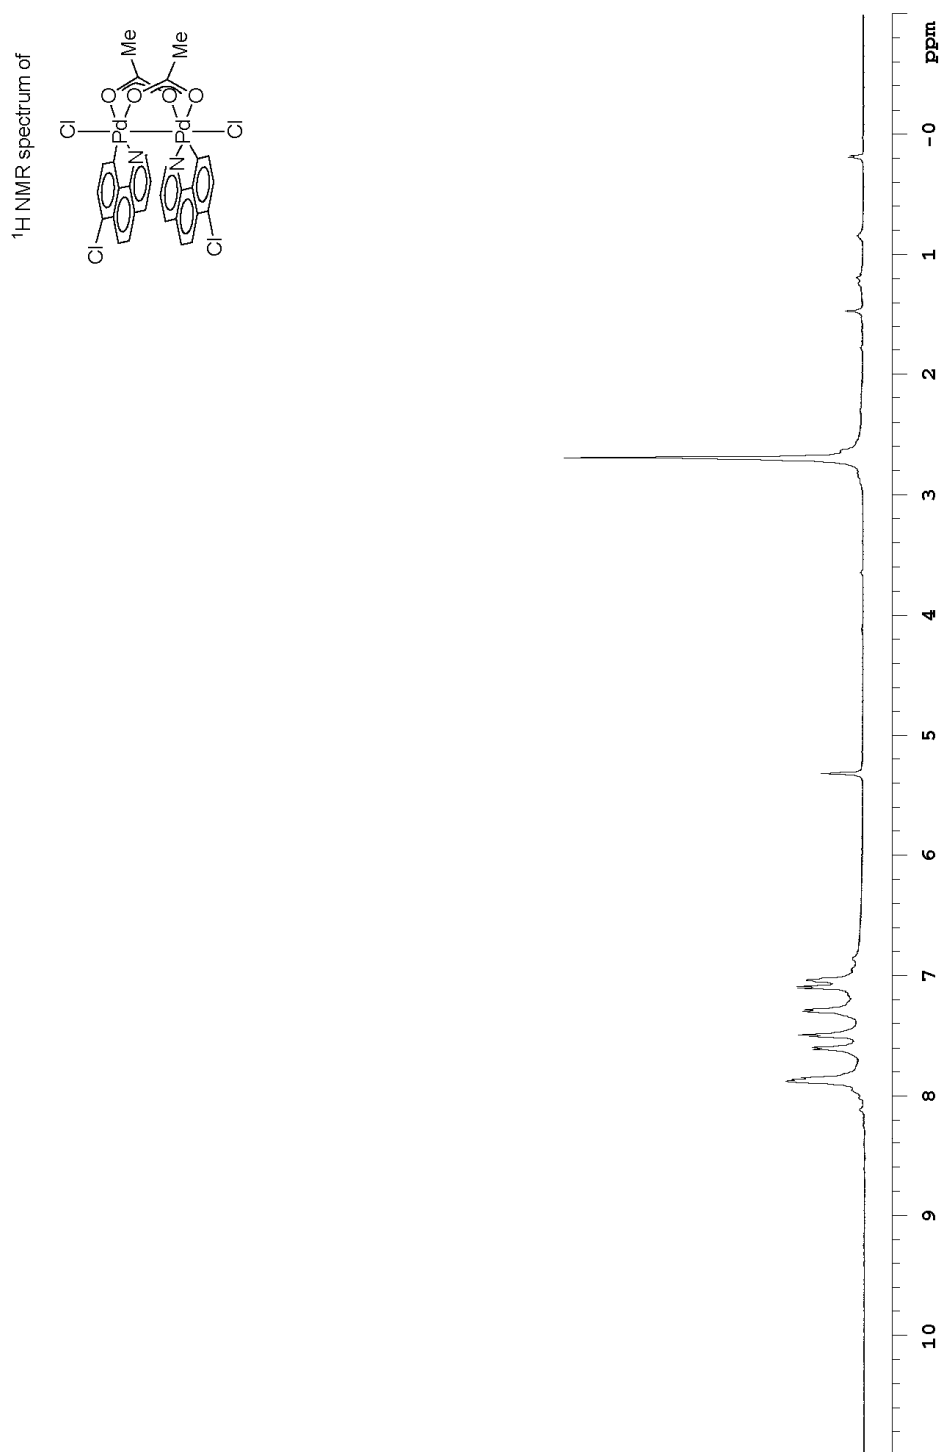

<sup>1</sup>H NMR spectrum of **18c** in CD<sub>2</sub>Cl<sub>2</sub> at -50 °C.

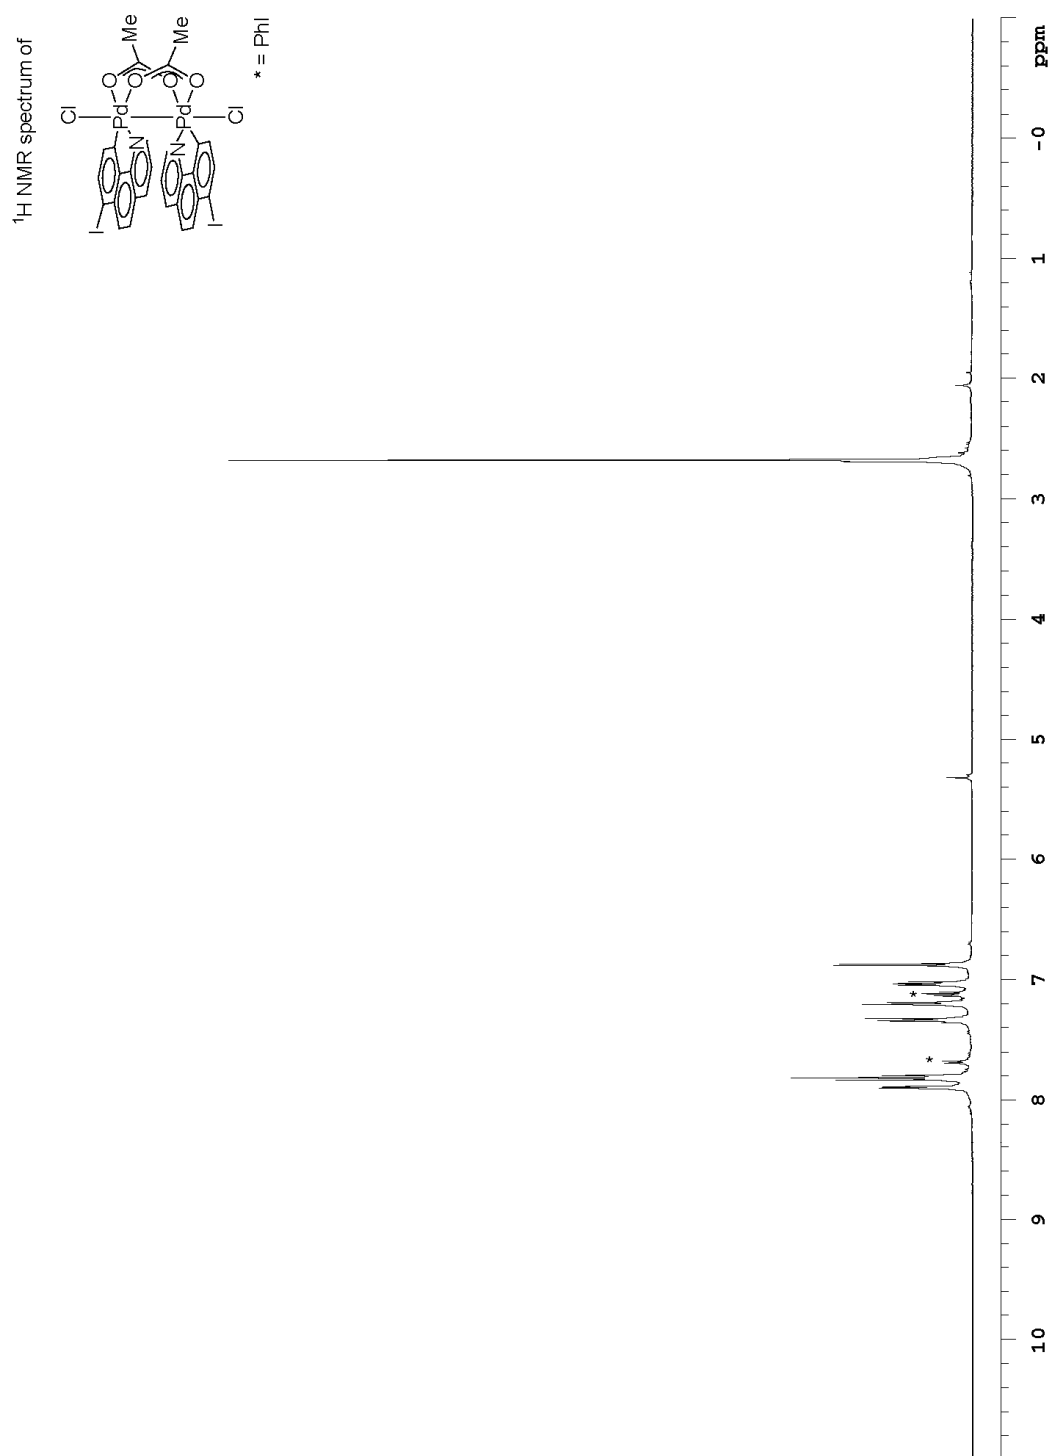

<sup>1</sup>H NMR spectrum of **18d** in CD<sub>2</sub>Cl<sub>2</sub> at -50 °C.

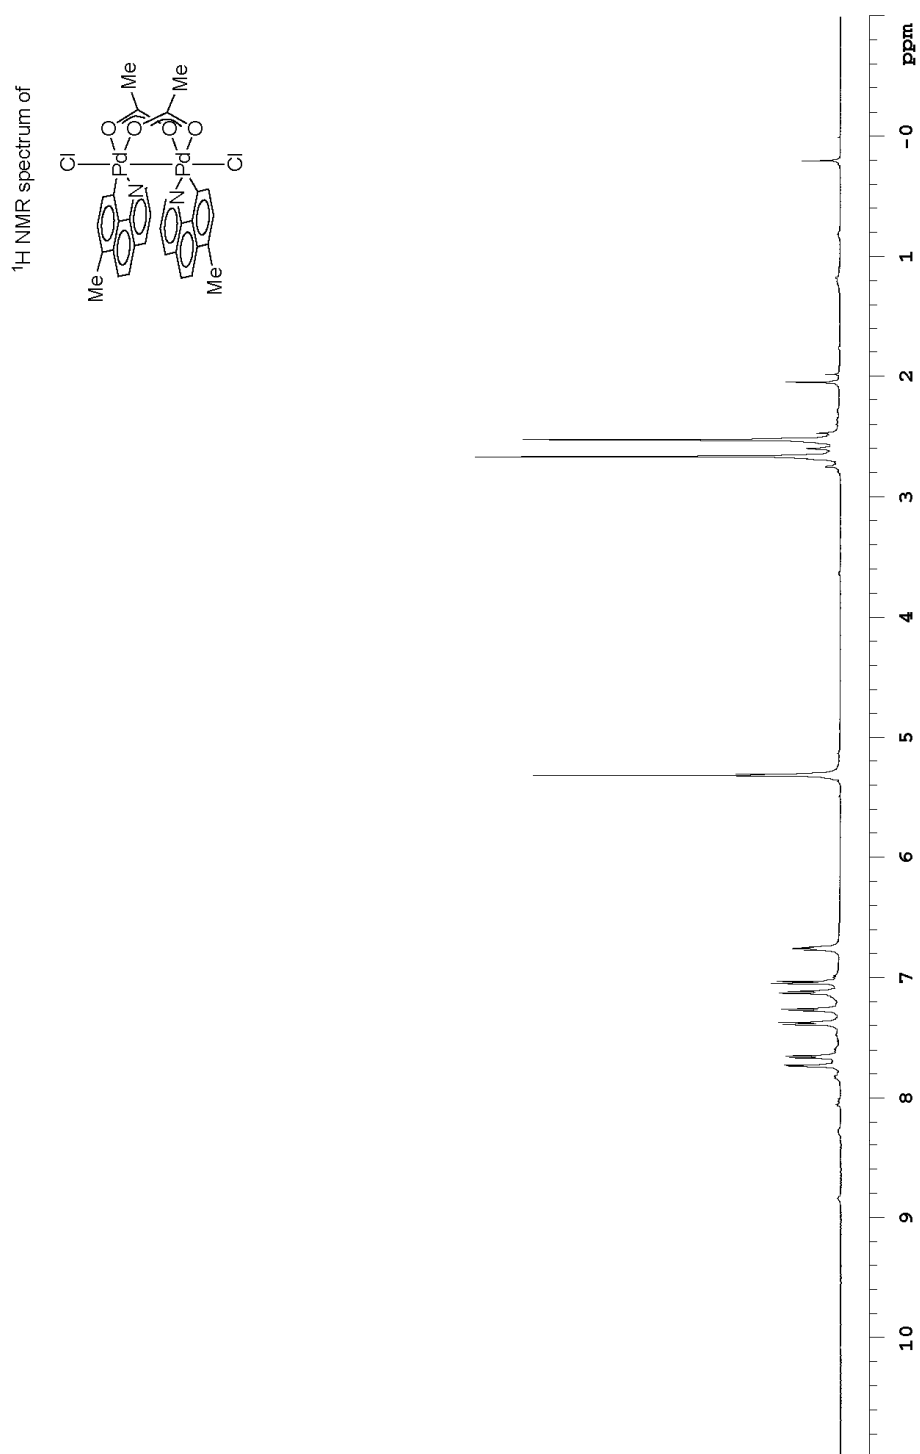

<sup>1</sup>H NMR spectrum of **18e** in CD<sub>2</sub>Cl<sub>2</sub> at -50 °C.

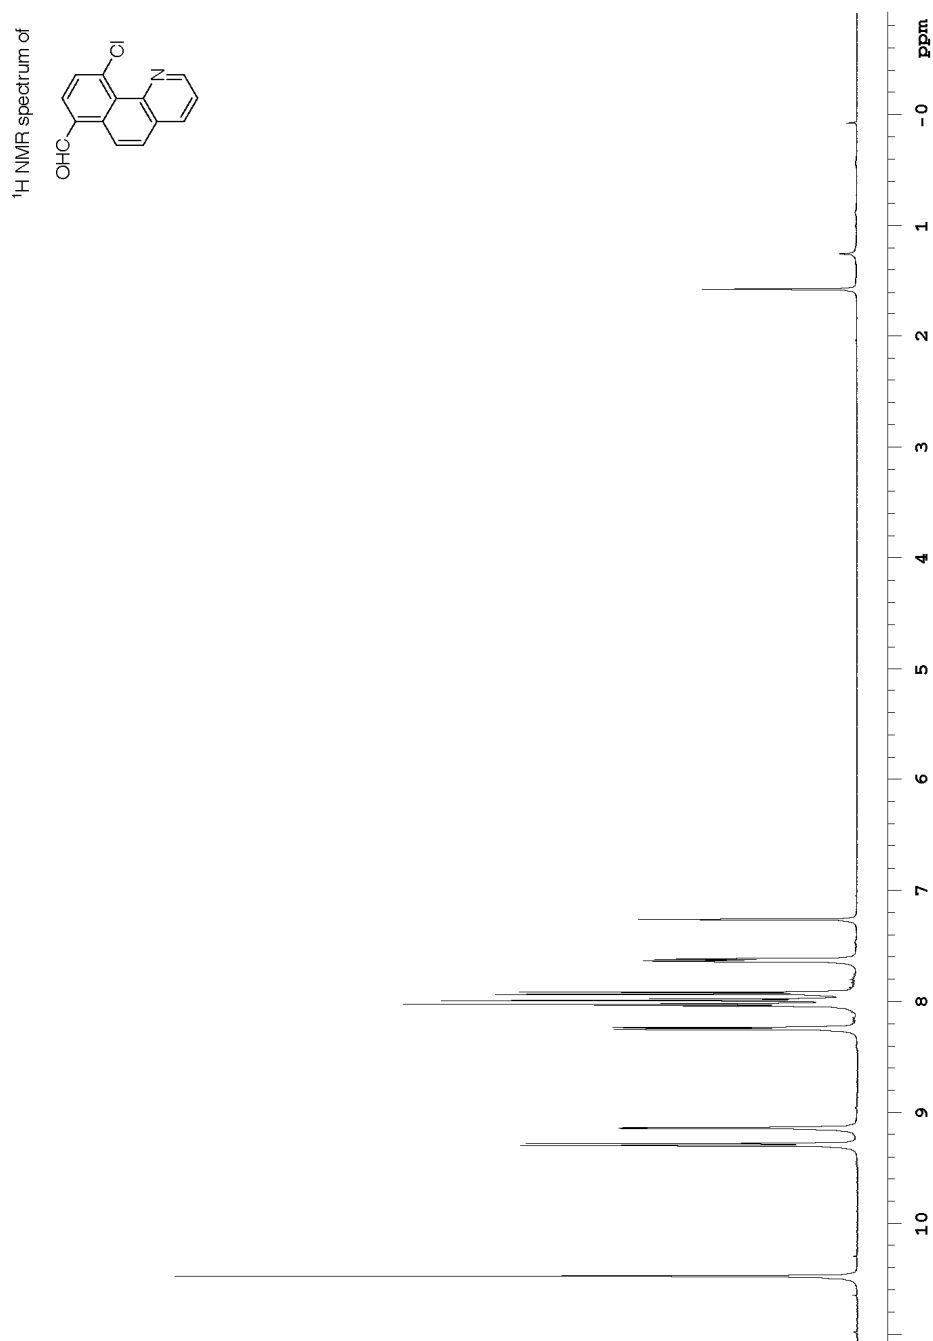

<sup>1</sup>H NMR spectrum of **19b** in CDCl<sub>3</sub> at 23 °C.

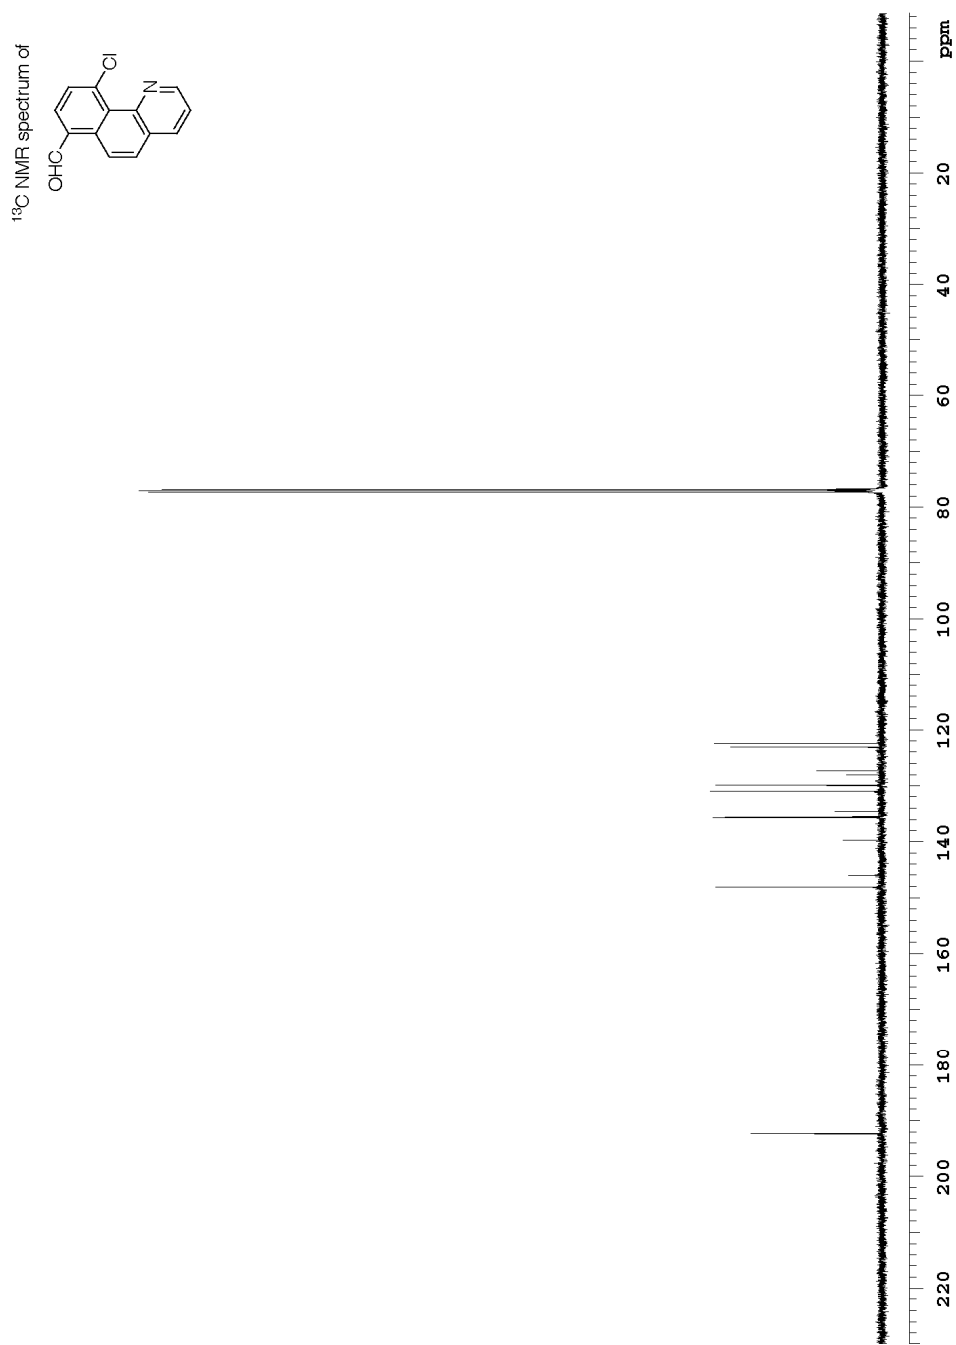

<sup>13</sup>C NMR spectrum of **19b** in CDCl<sub>3</sub> at 23 °C.

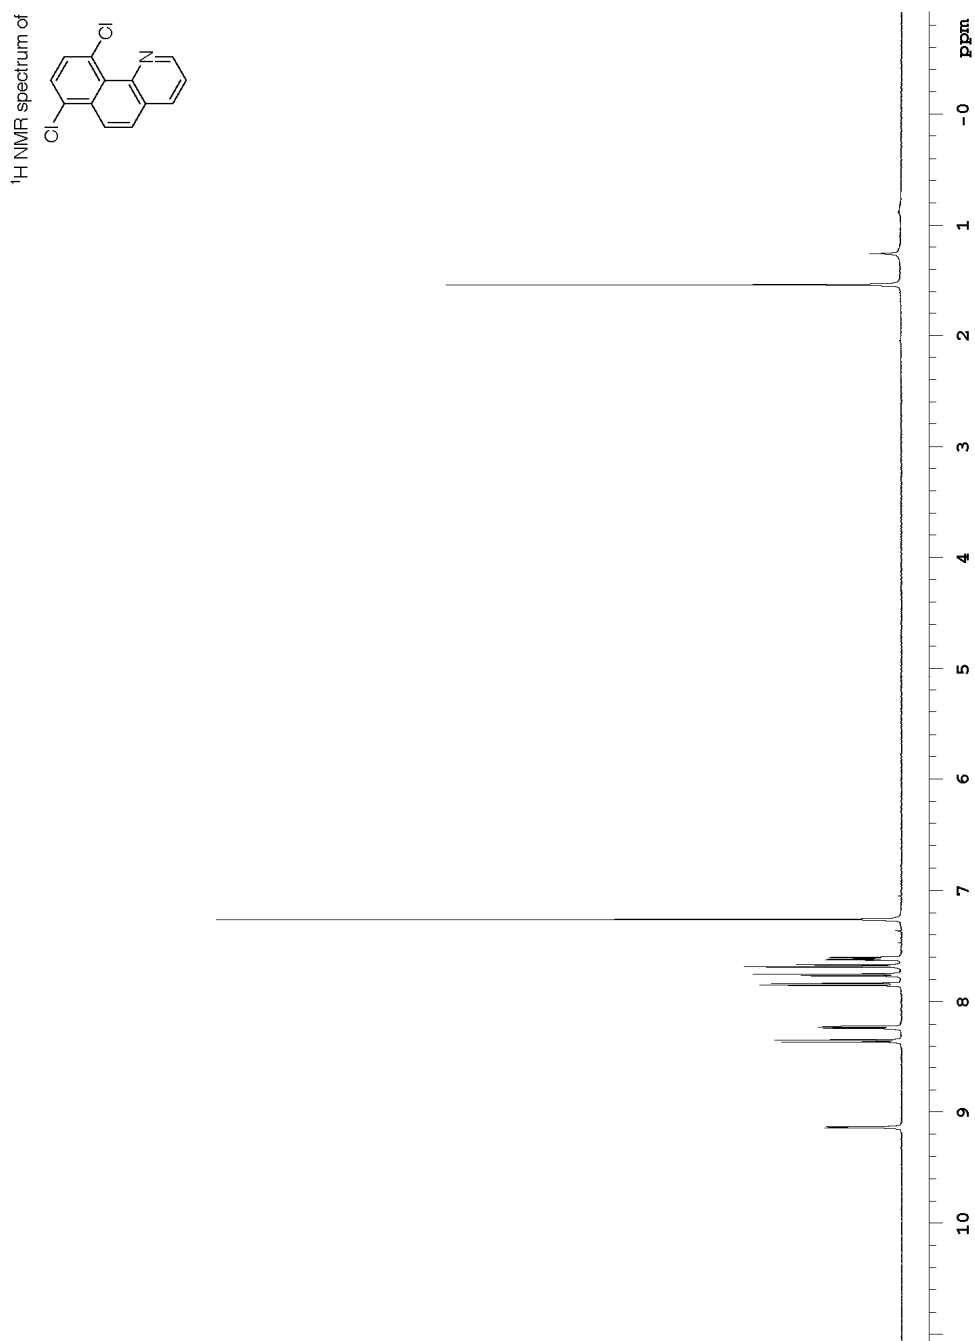

<sup>1</sup>H NMR spectrum of **19c** in CDCl<sub>3</sub> at 23 °C.

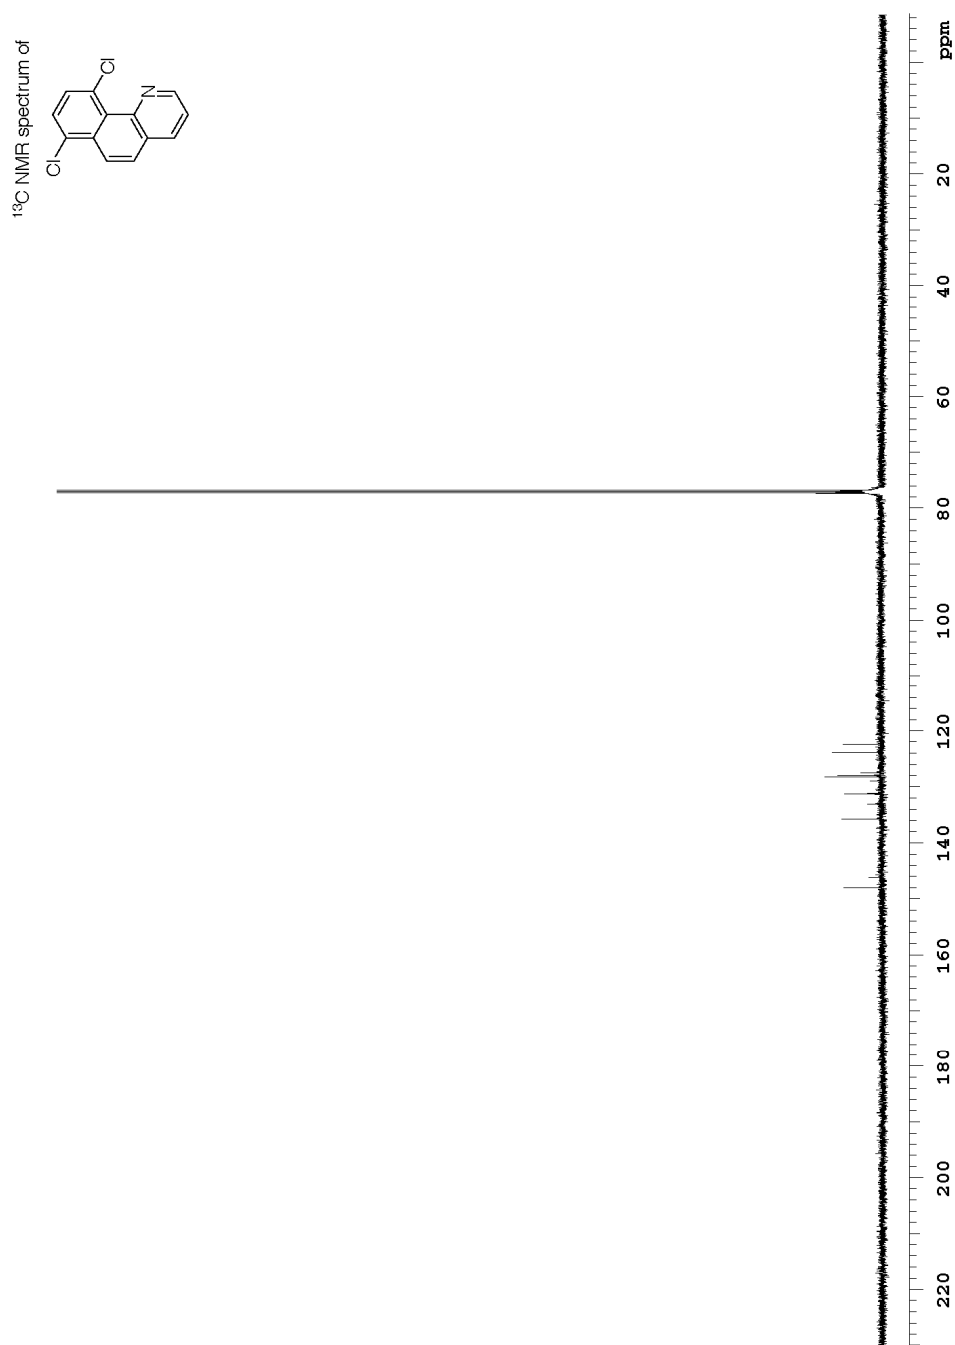

<sup>13</sup>C NMR spectrum of **19c** in CDCl<sub>3</sub> at 23 °C.

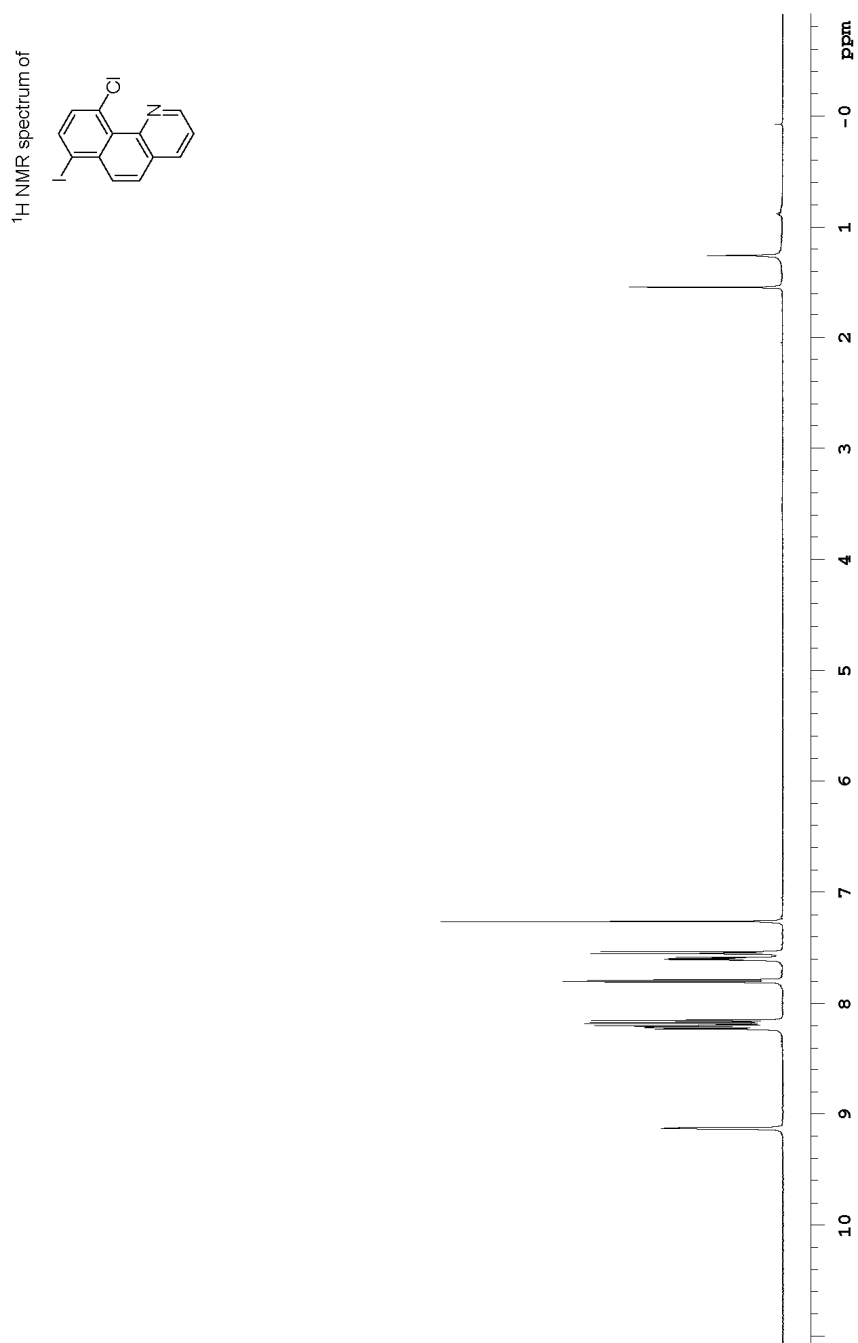

<sup>1</sup>H NMR spectrum of **19d** in CDCl<sub>3</sub> at 23 °C.



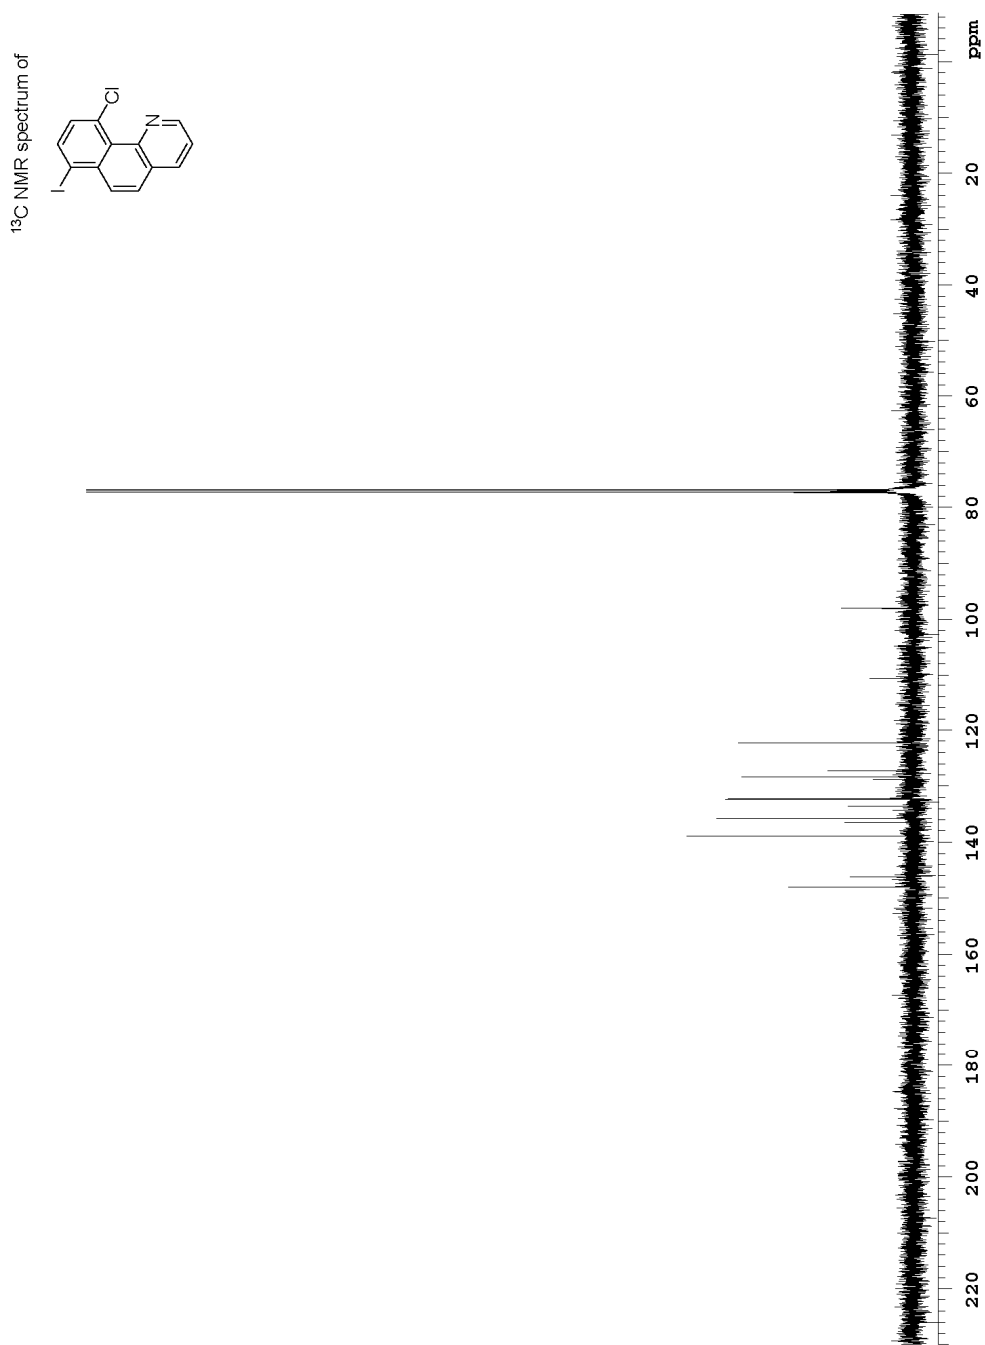

<sup>13</sup>C NMR spectrum of **19d** in CDCl<sub>3</sub> at 23 °C.

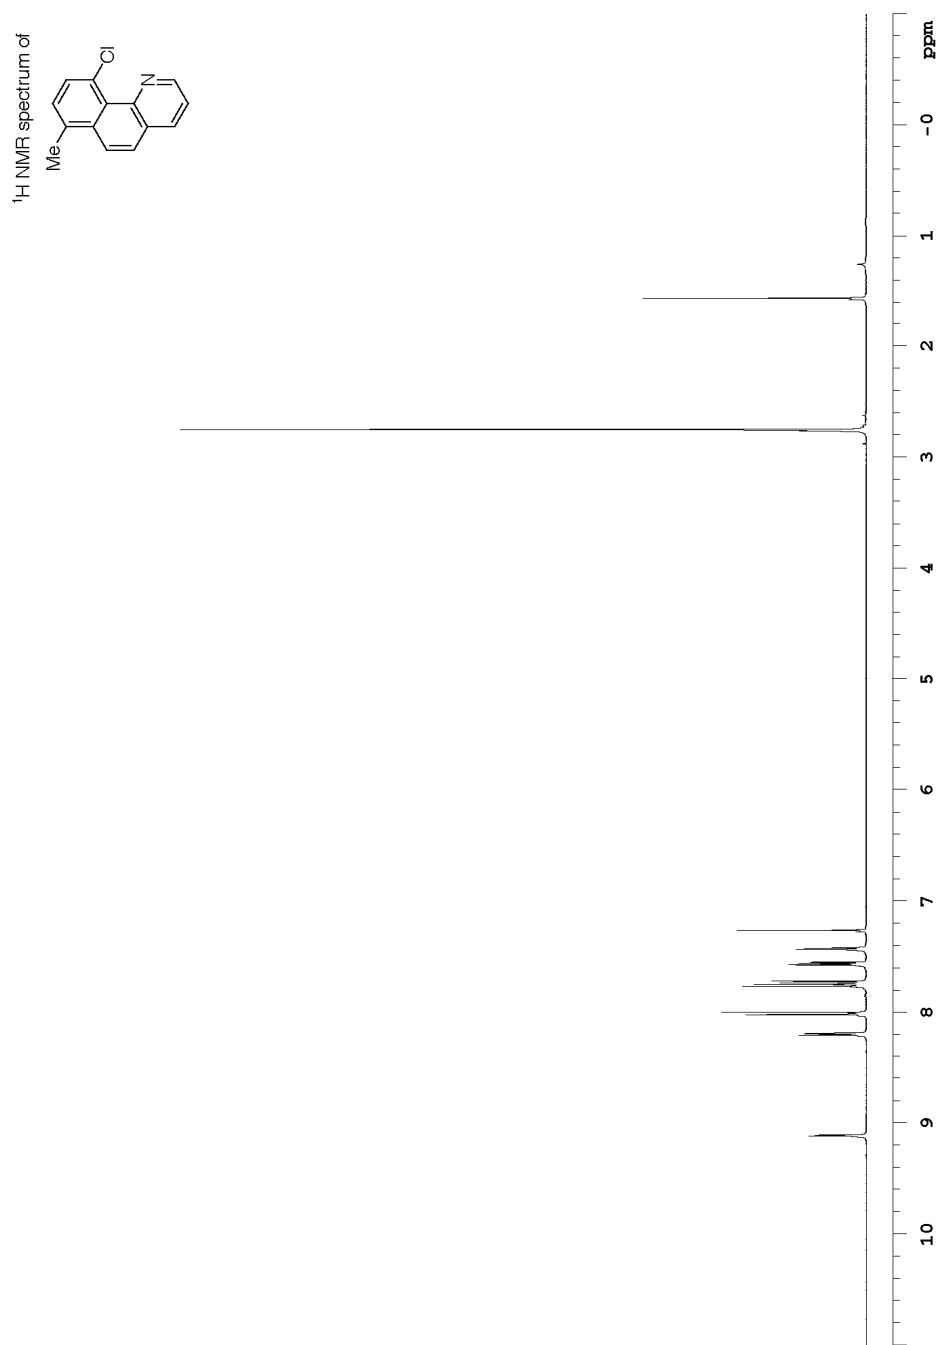

<sup>1</sup>H NMR spectrum of **19e** in CDCl<sub>3</sub> at 23 °C.

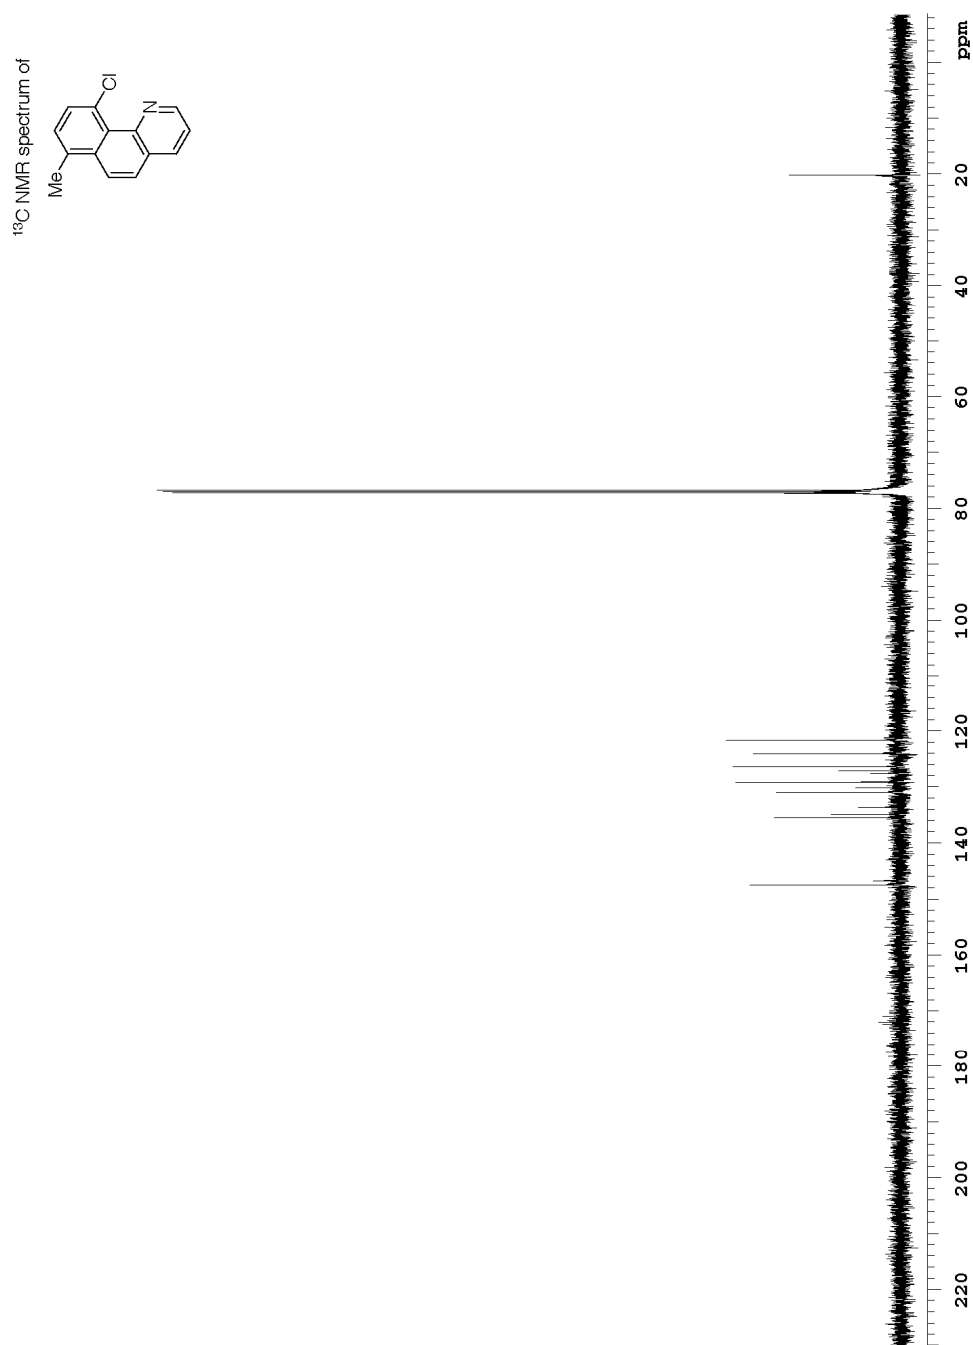

<sup>13</sup>C NMR spectrum of **19e** in CDCl<sub>3</sub> at 23 °C.

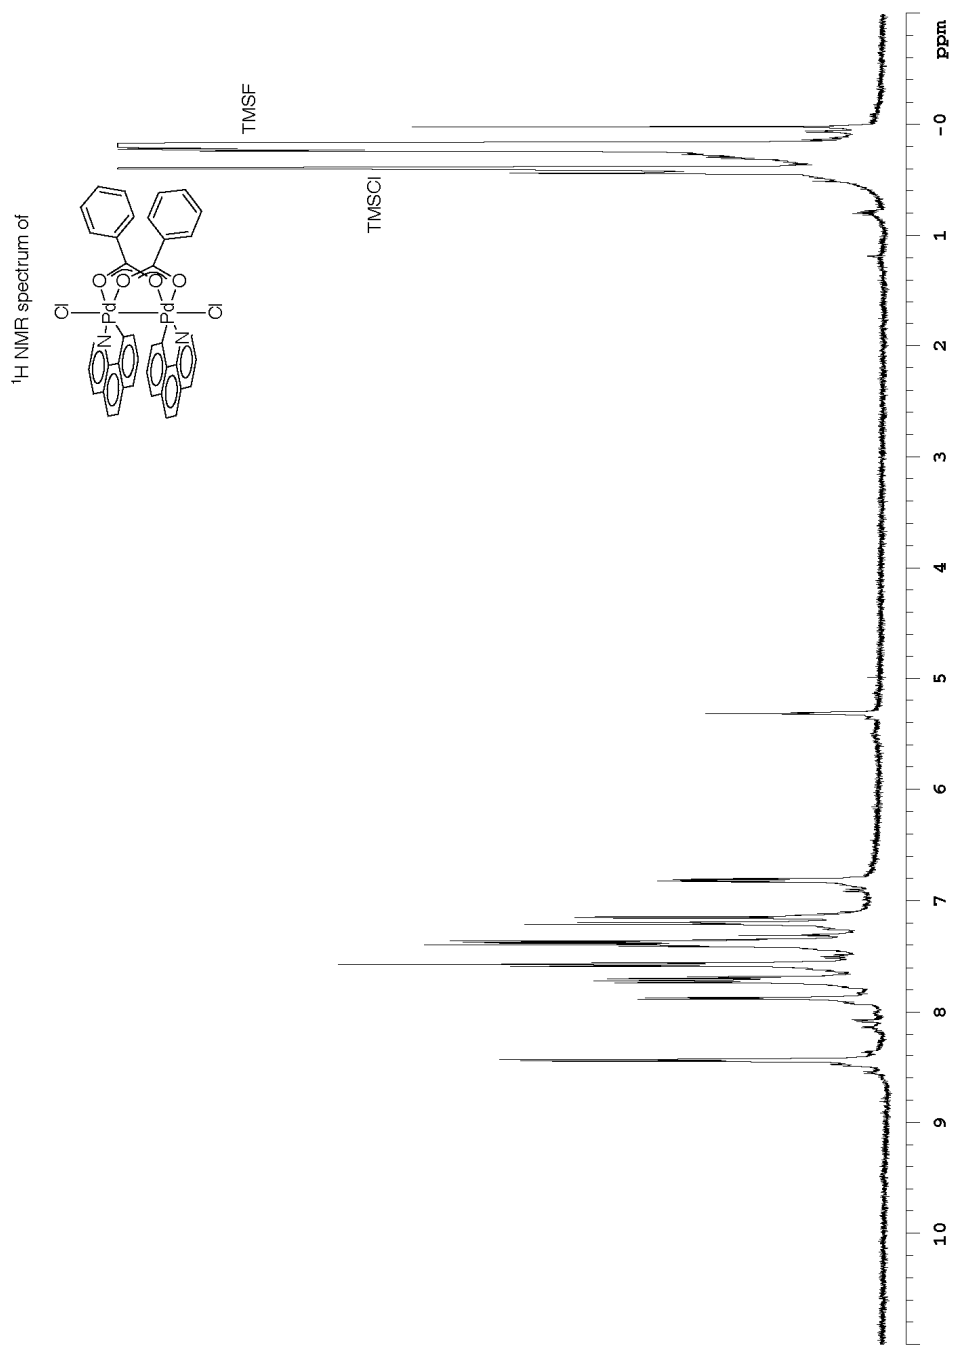

<sup>1</sup>H NMR spectrum of **20a** in CD<sub>2</sub>Cl<sub>2</sub> at -50 °C.

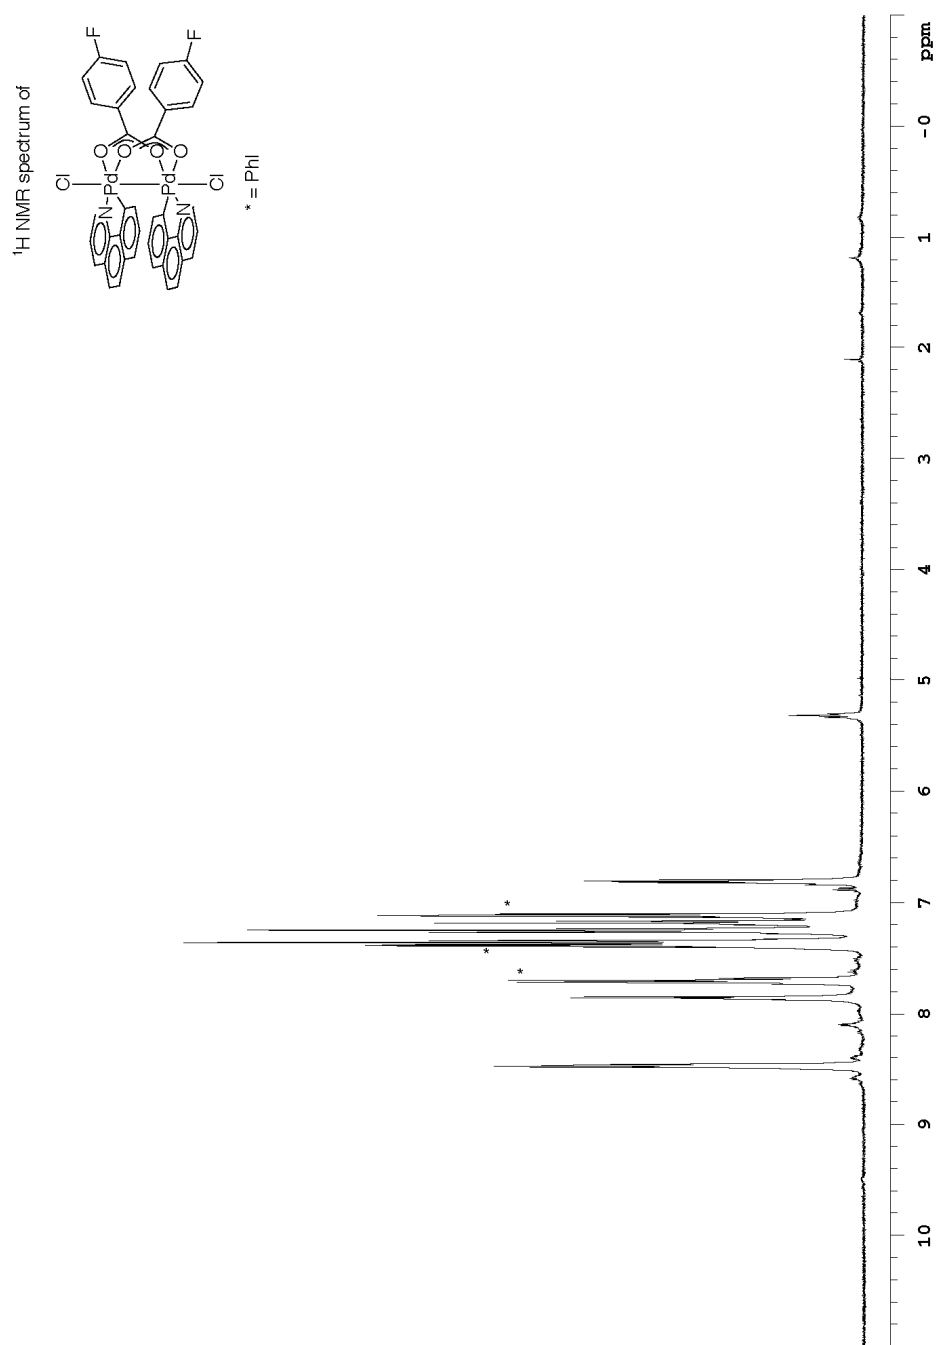

<sup>1</sup>H NMR spectrum of **20b** in CD<sub>2</sub>Cl<sub>2</sub> at -50 °C.

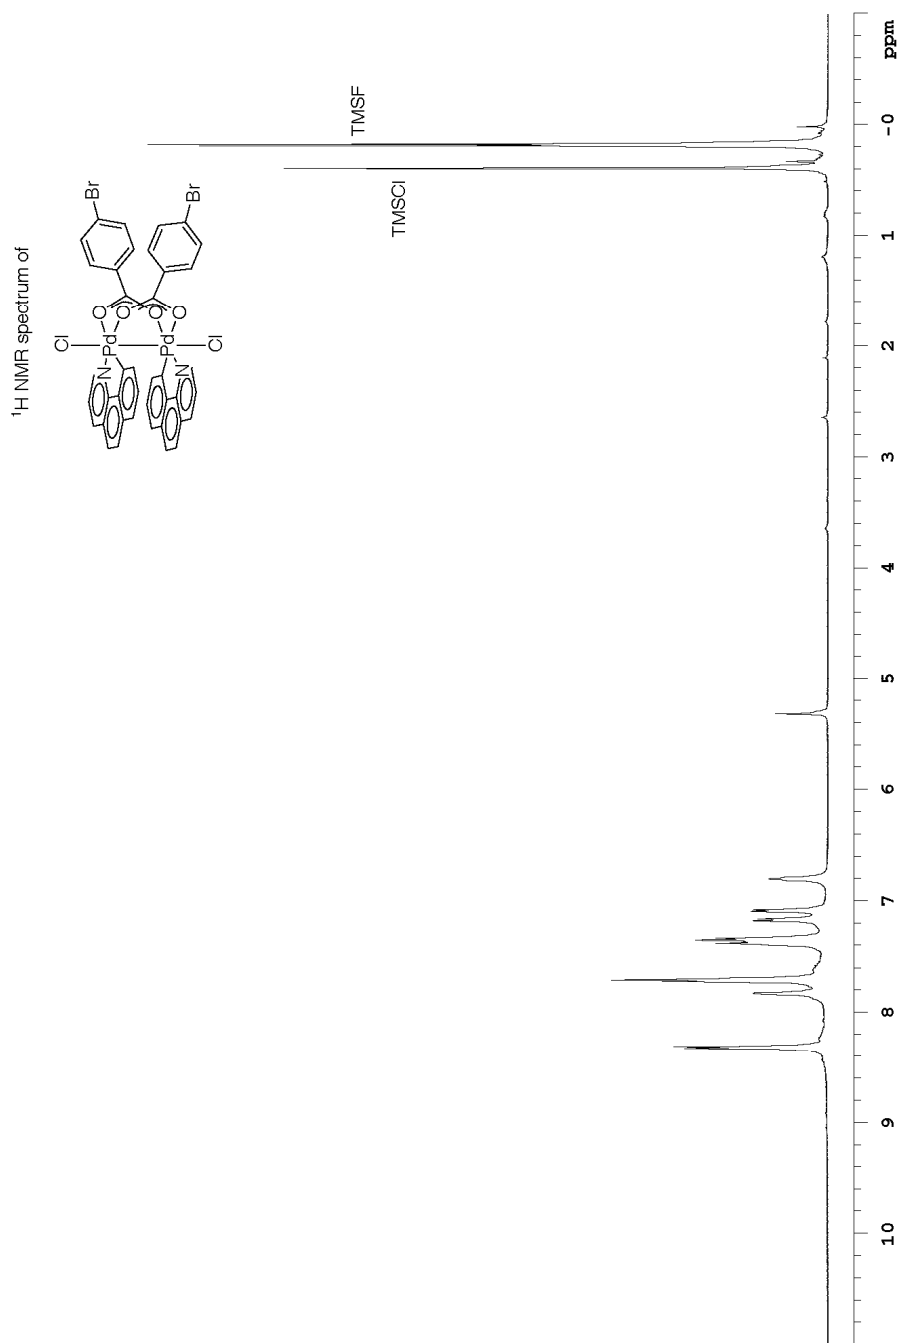

<sup>1</sup>H NMR spectrum of **20c** in CD<sub>2</sub>Cl<sub>2</sub> at -50 °C.

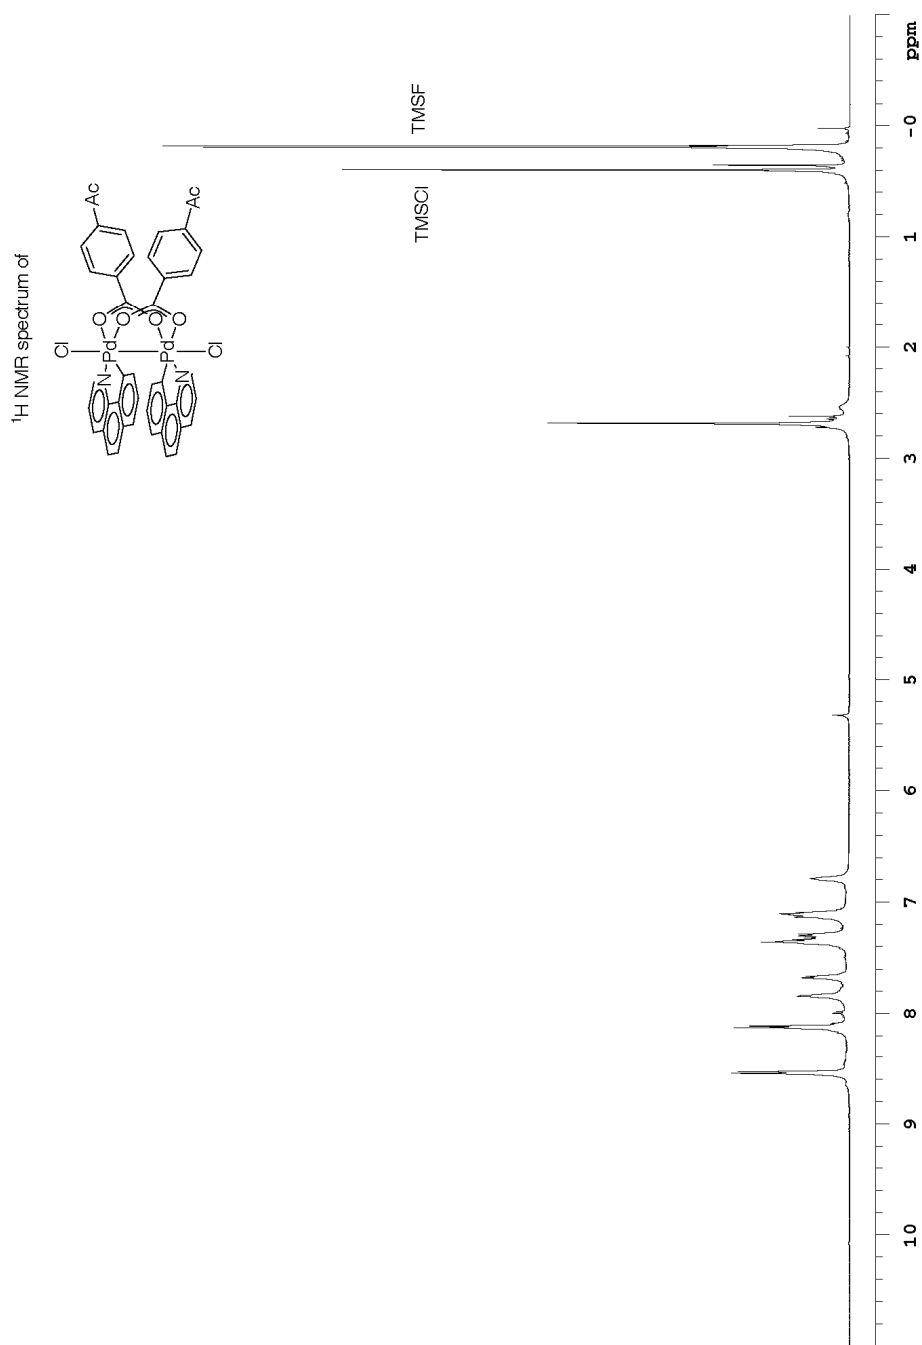

<sup>1</sup>H NMR spectrum of **20d** in CD<sub>2</sub>Cl<sub>2</sub> at -50 °C.

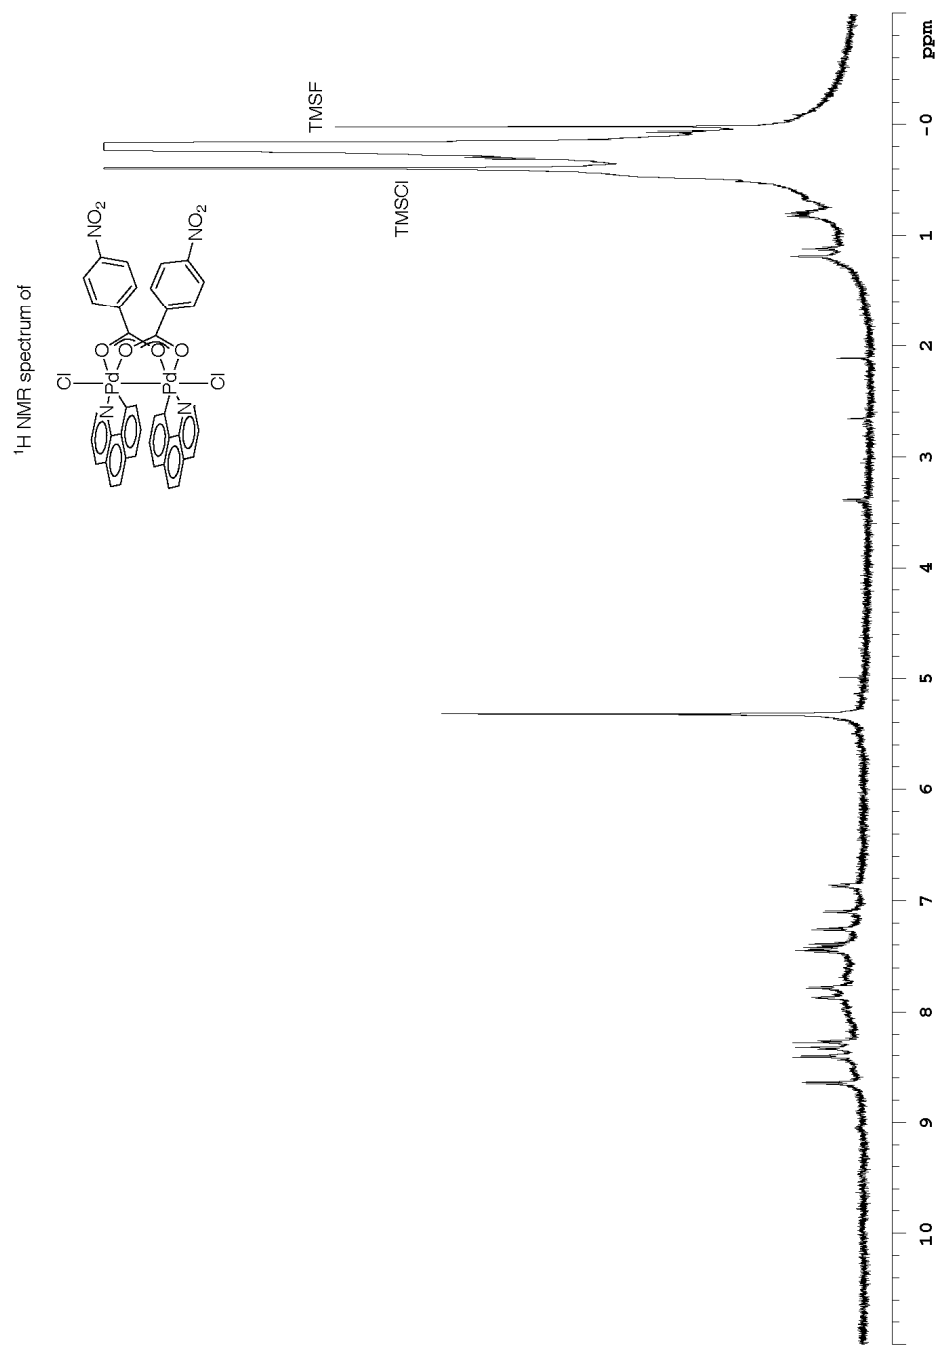

<sup>1</sup>H NMR spectrum of **20e** in CD<sub>2</sub>Cl<sub>2</sub> at -50 °C.



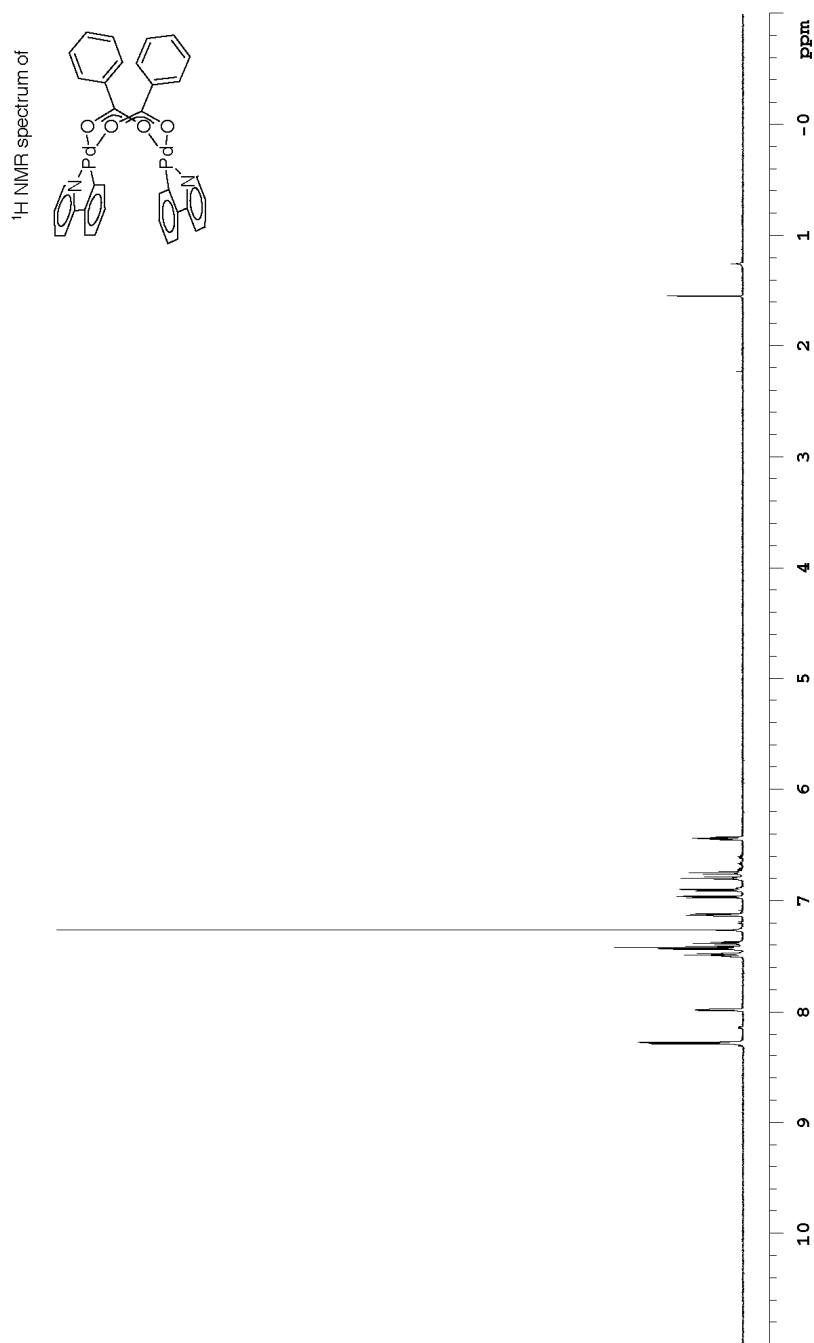

<sup>1</sup>H NMR spectrum of **21** in CDCl<sub>3</sub> at 23 °C.

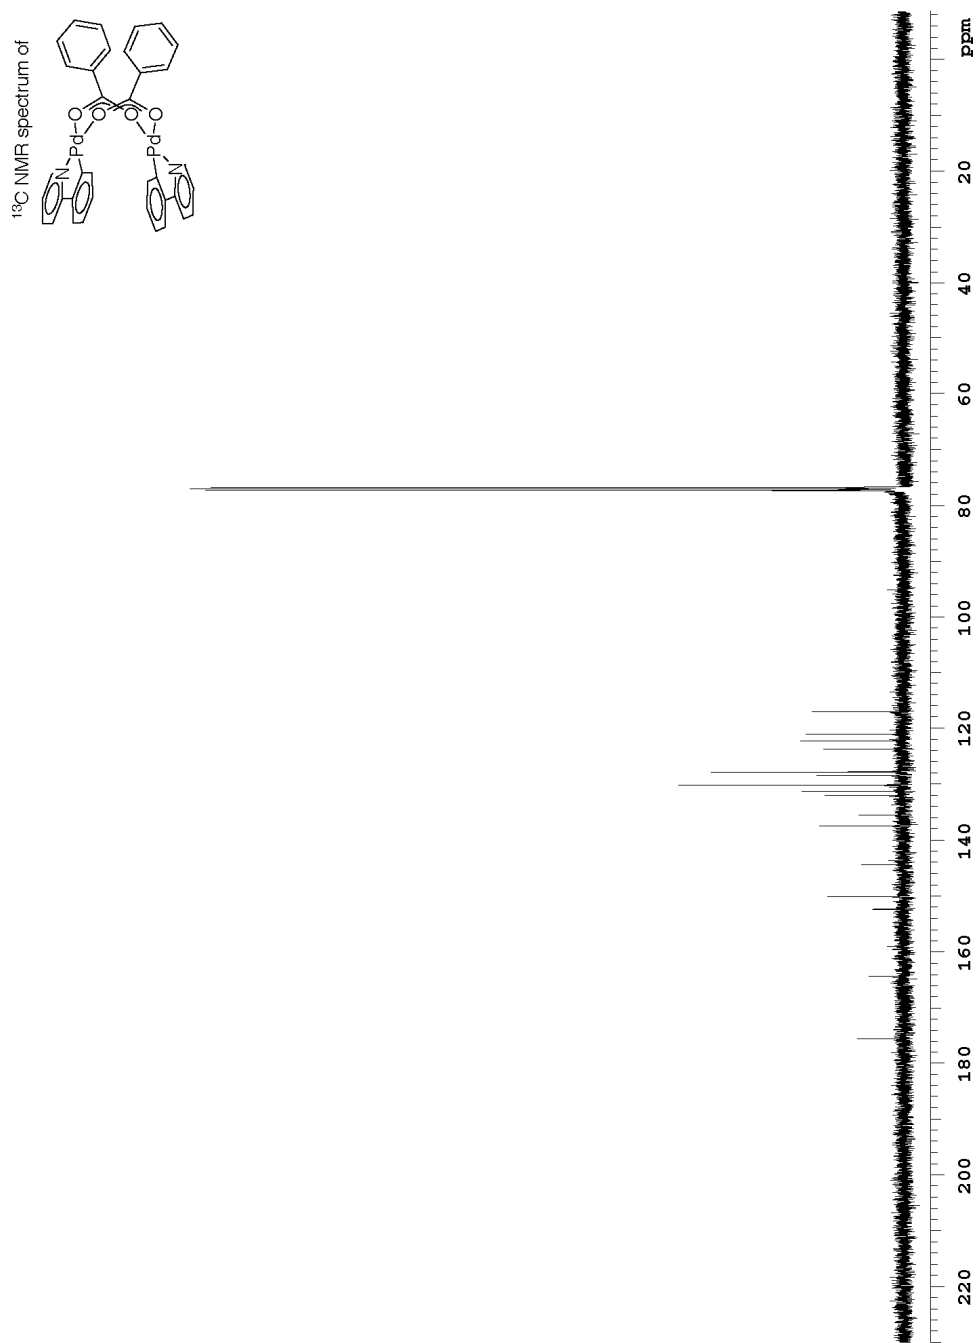

<sup>13</sup>C NMR spectrum of **21** in CDCl<sub>3</sub> at 23 °C.

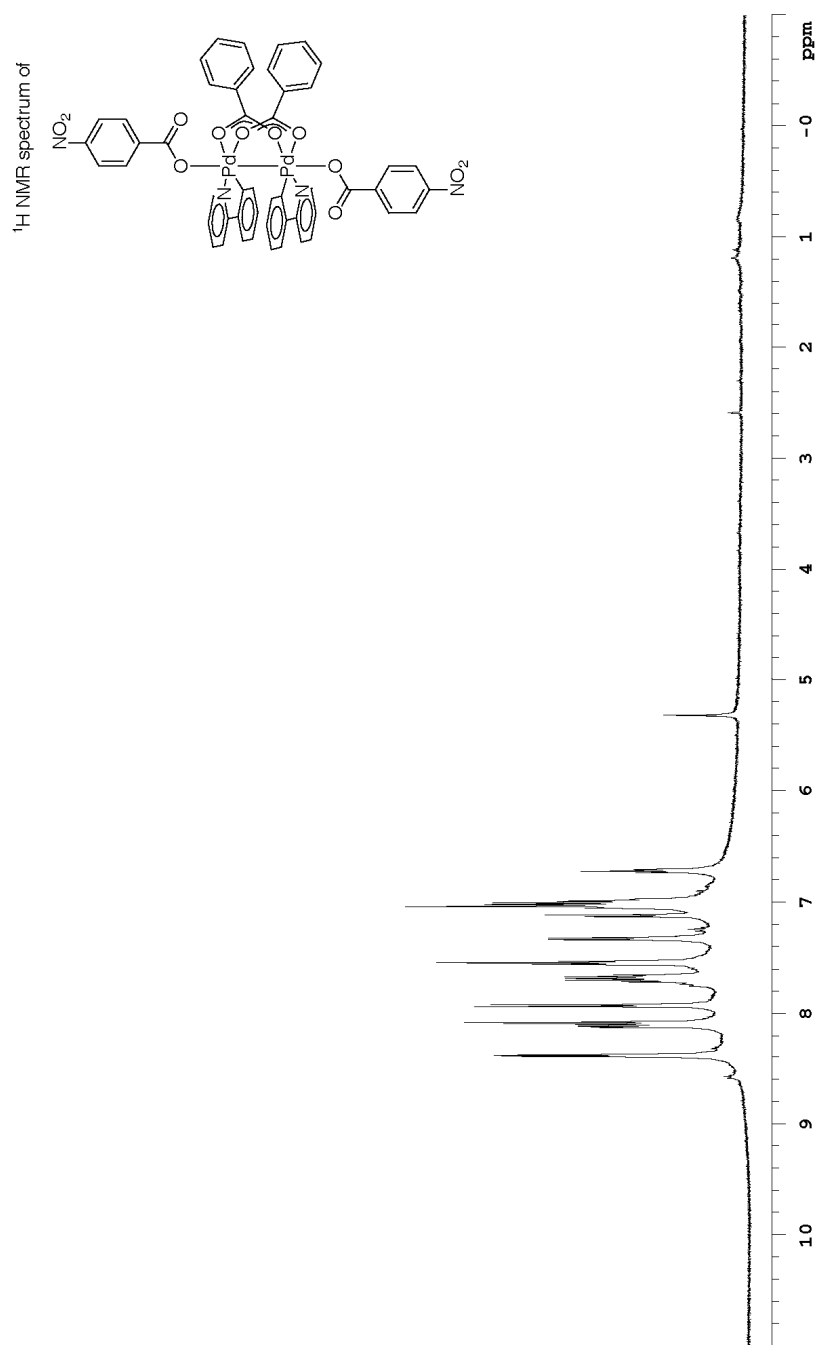

<sup>1</sup>H NMR spectrum of **22** in CD<sub>2</sub>Cl<sub>2</sub> at -50 °C.

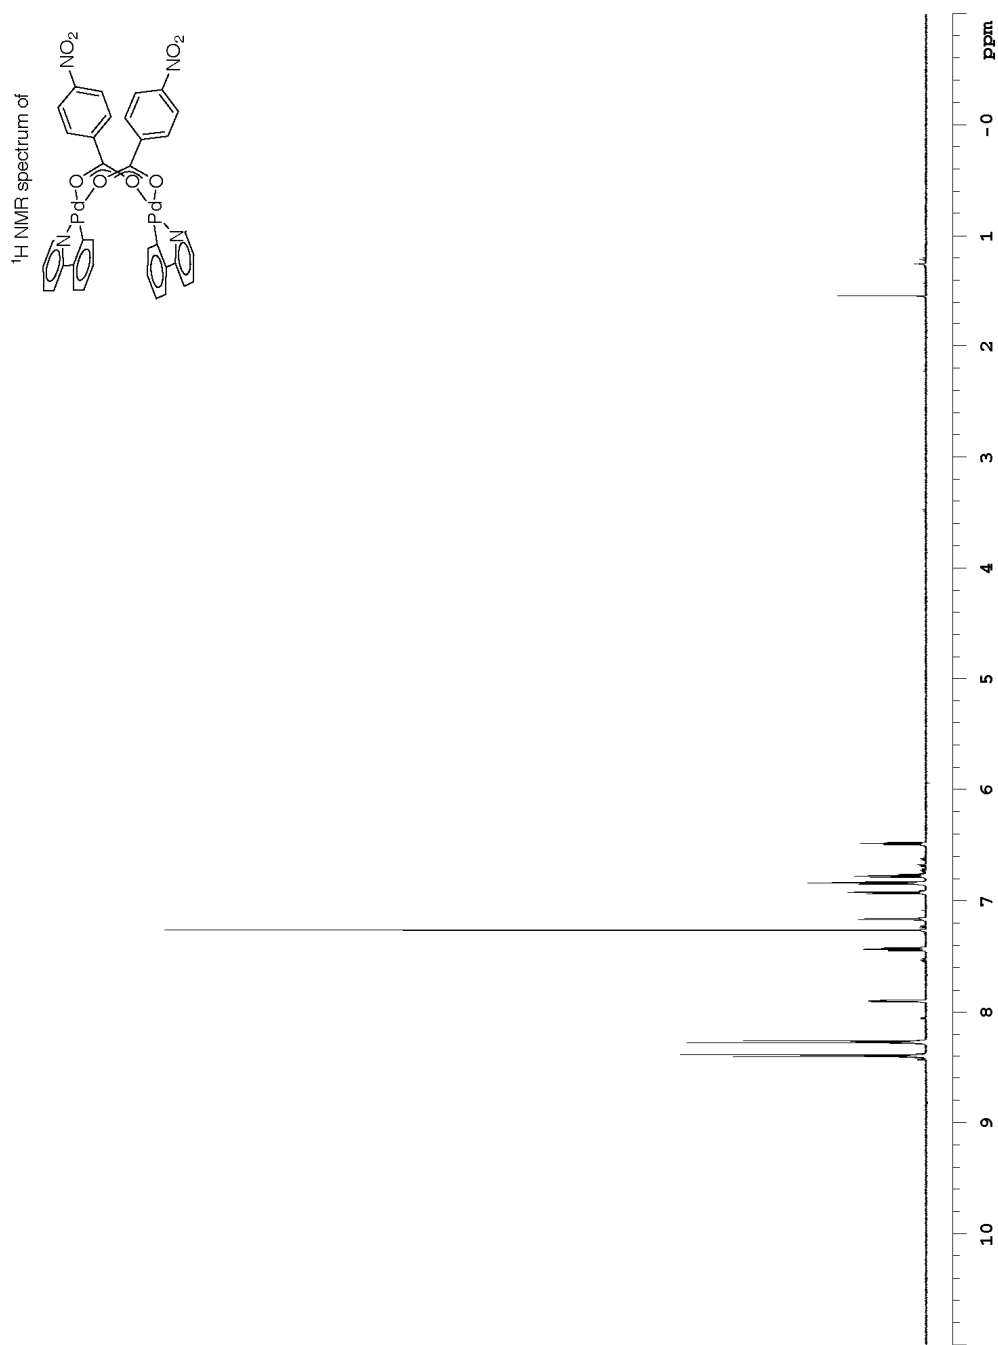

<sup>1</sup>H NMR spectrum of **23** in CDCl<sub>3</sub> at 23 °C.

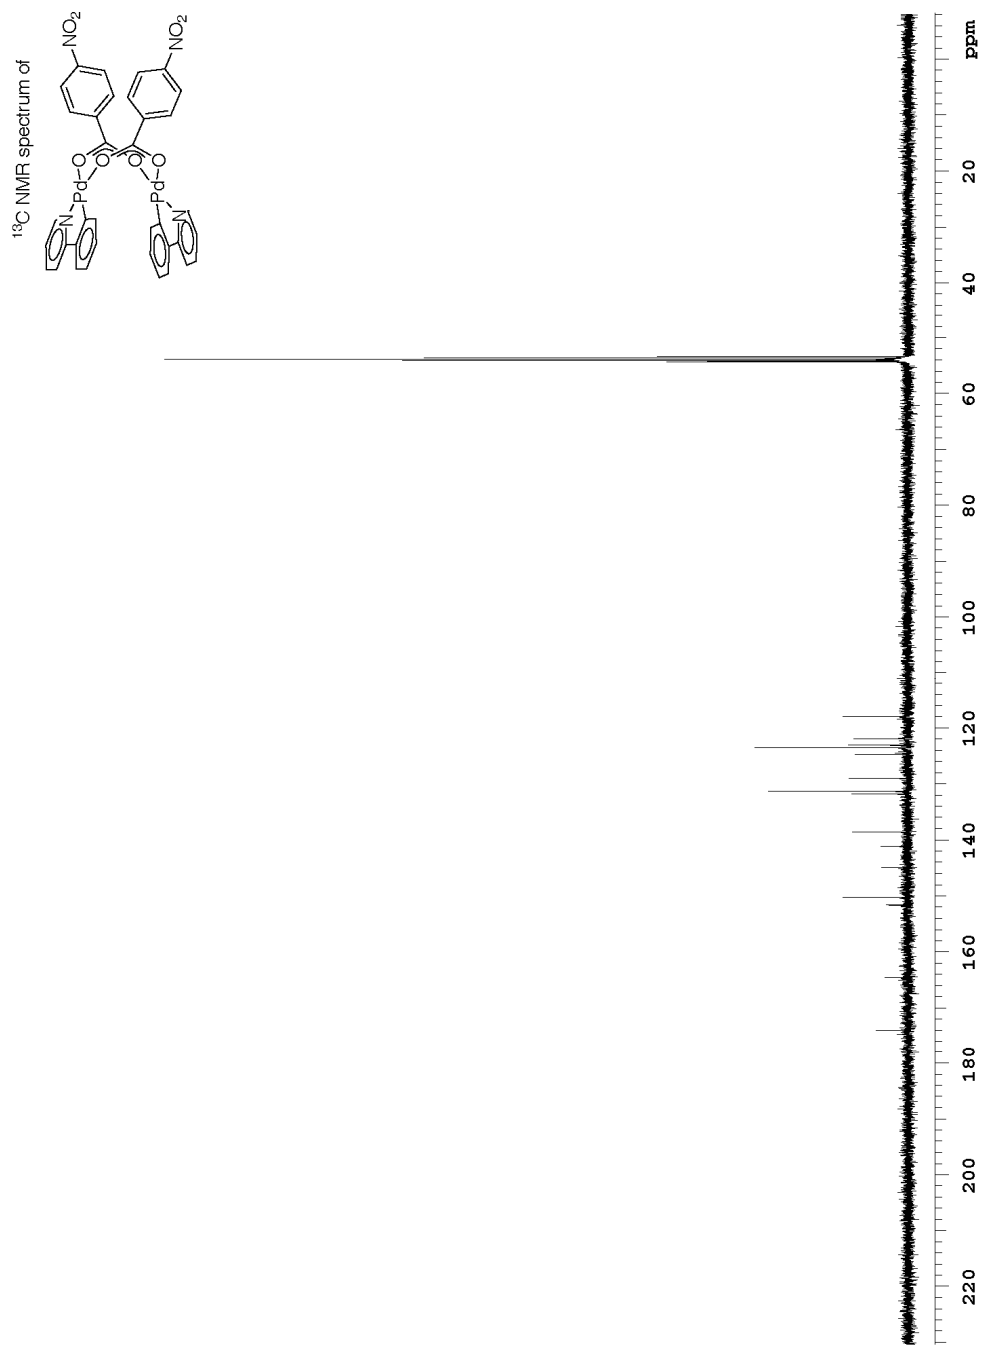

<sup>13</sup>C NMR spectrum of **23** in CD<sub>2</sub>Cl<sub>2</sub> at 23 °C.

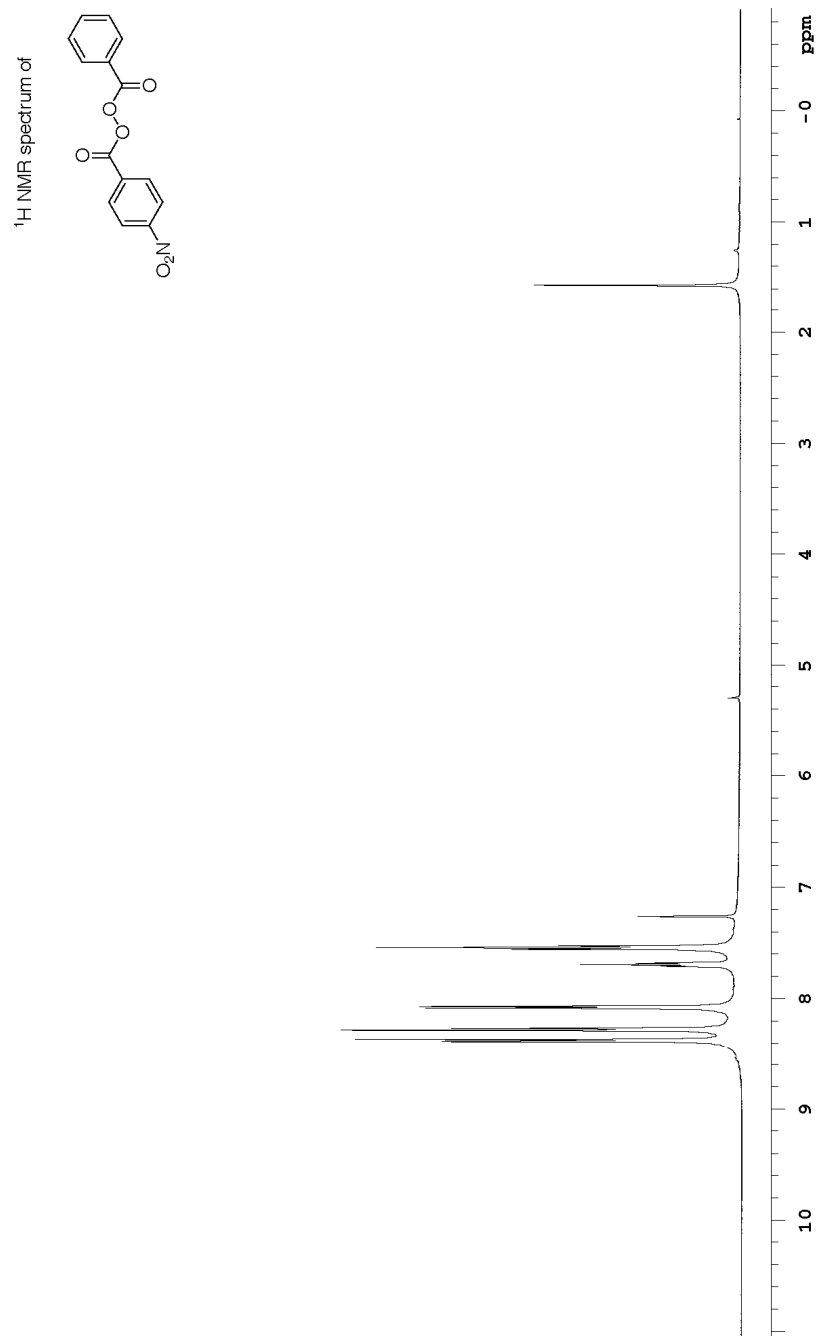

<sup>1</sup>H NMR spectrum of **30** in CDCl<sub>3</sub> at 23 °C.

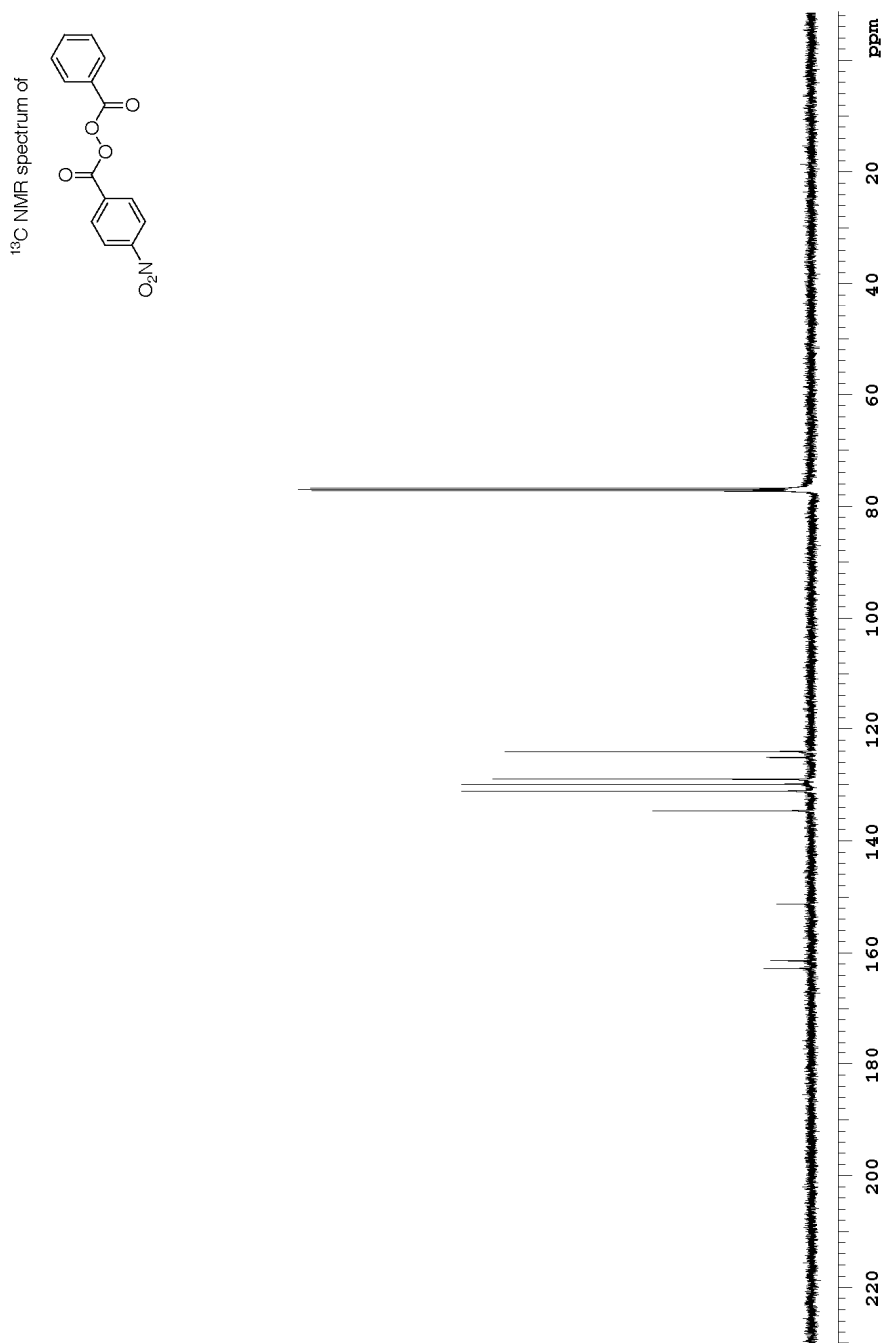

<sup>13</sup>C NMR spectrum of **30** in CDCl<sub>3</sub> at 23 °C.

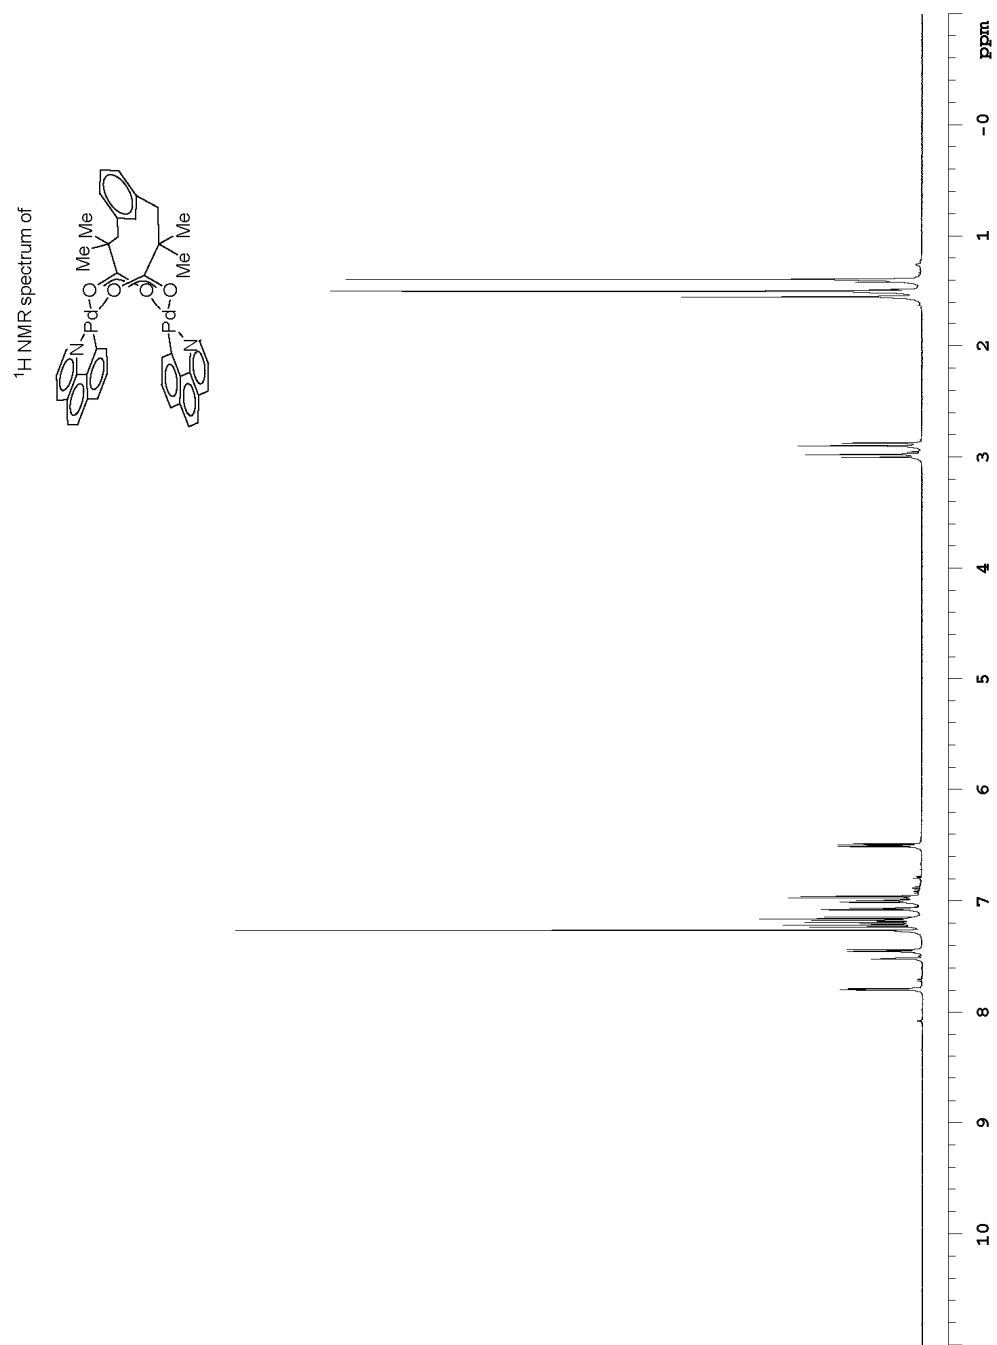

<sup>1</sup>H NMR spectrum of **34** in CDCl<sub>3</sub> at 23 °C.



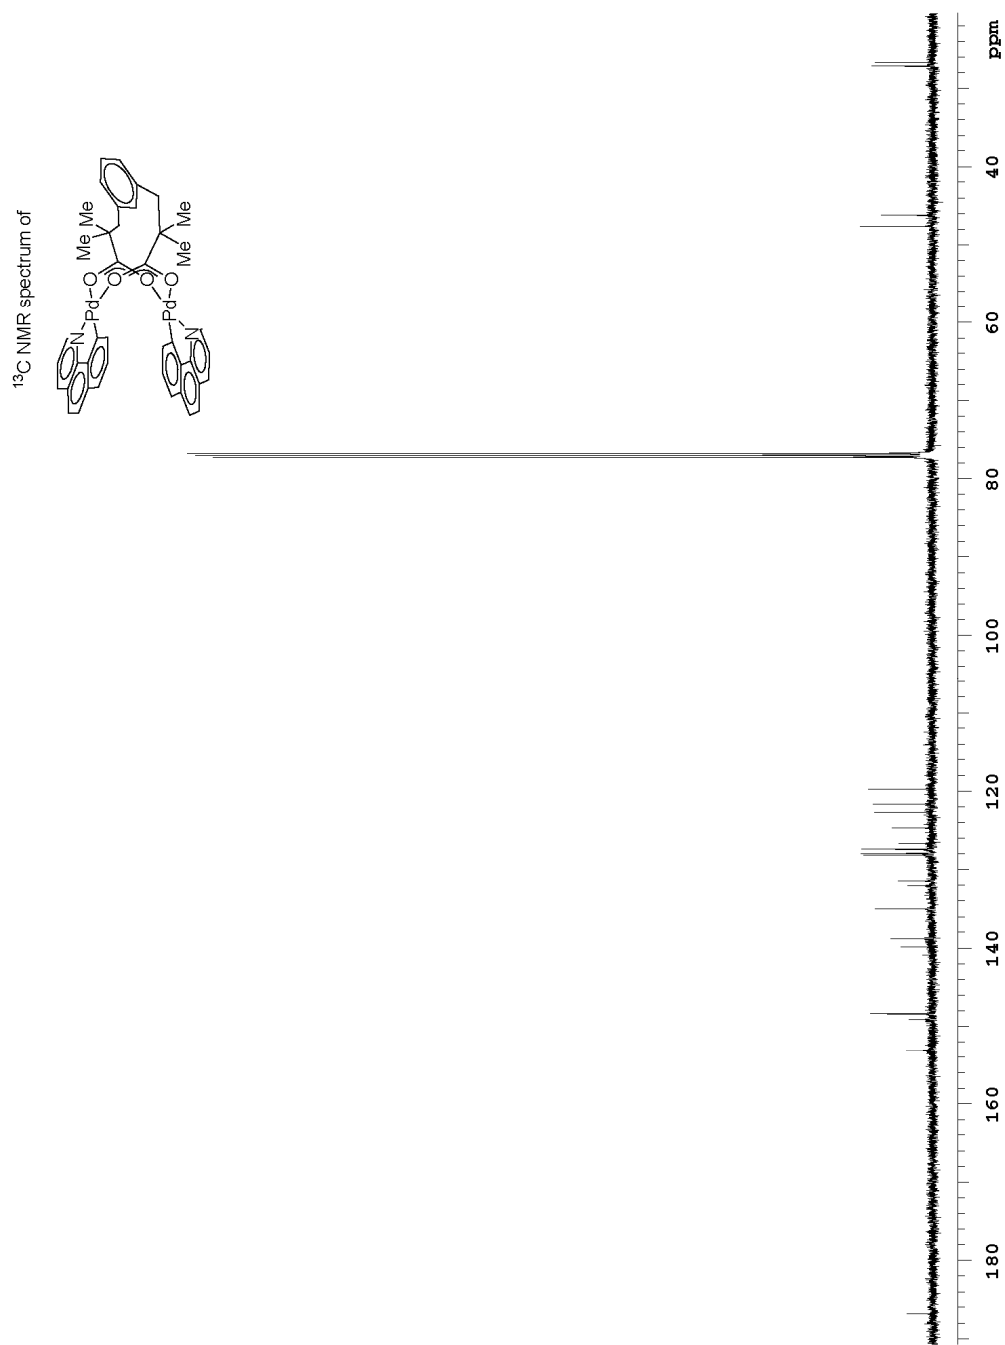

<sup>13</sup>C NMR spectrum of **34** in CDCl<sub>3</sub> at 23 °C.



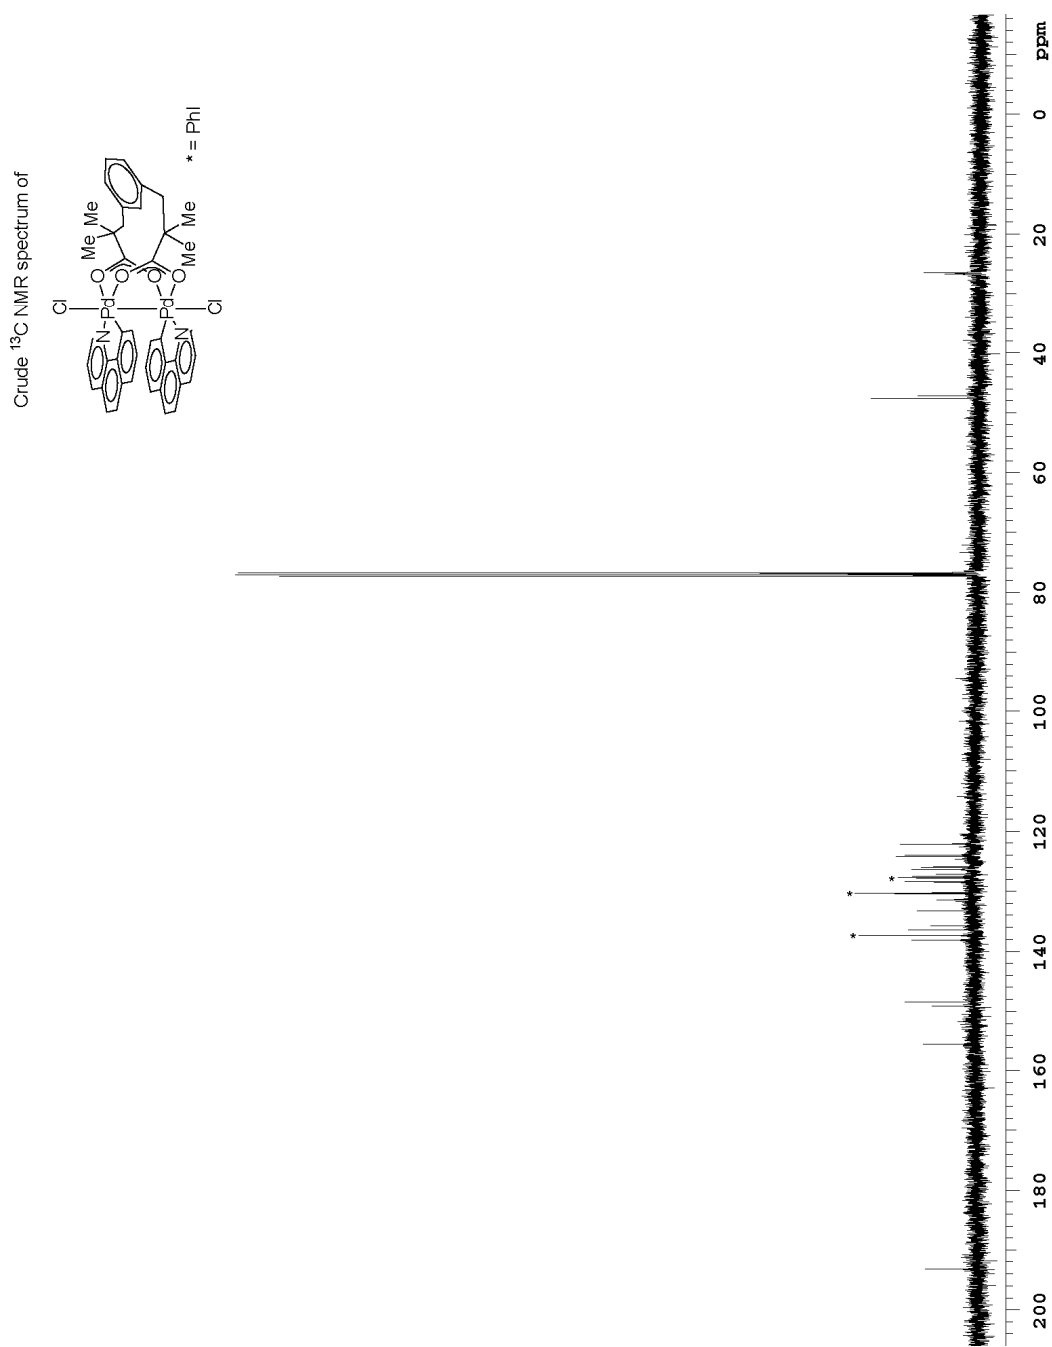

$^{13}\text{C}$  NMR spectrum of **35** in  $\text{CDCl}_3$  at  $-30\text{ }^\circ\text{C}$ .

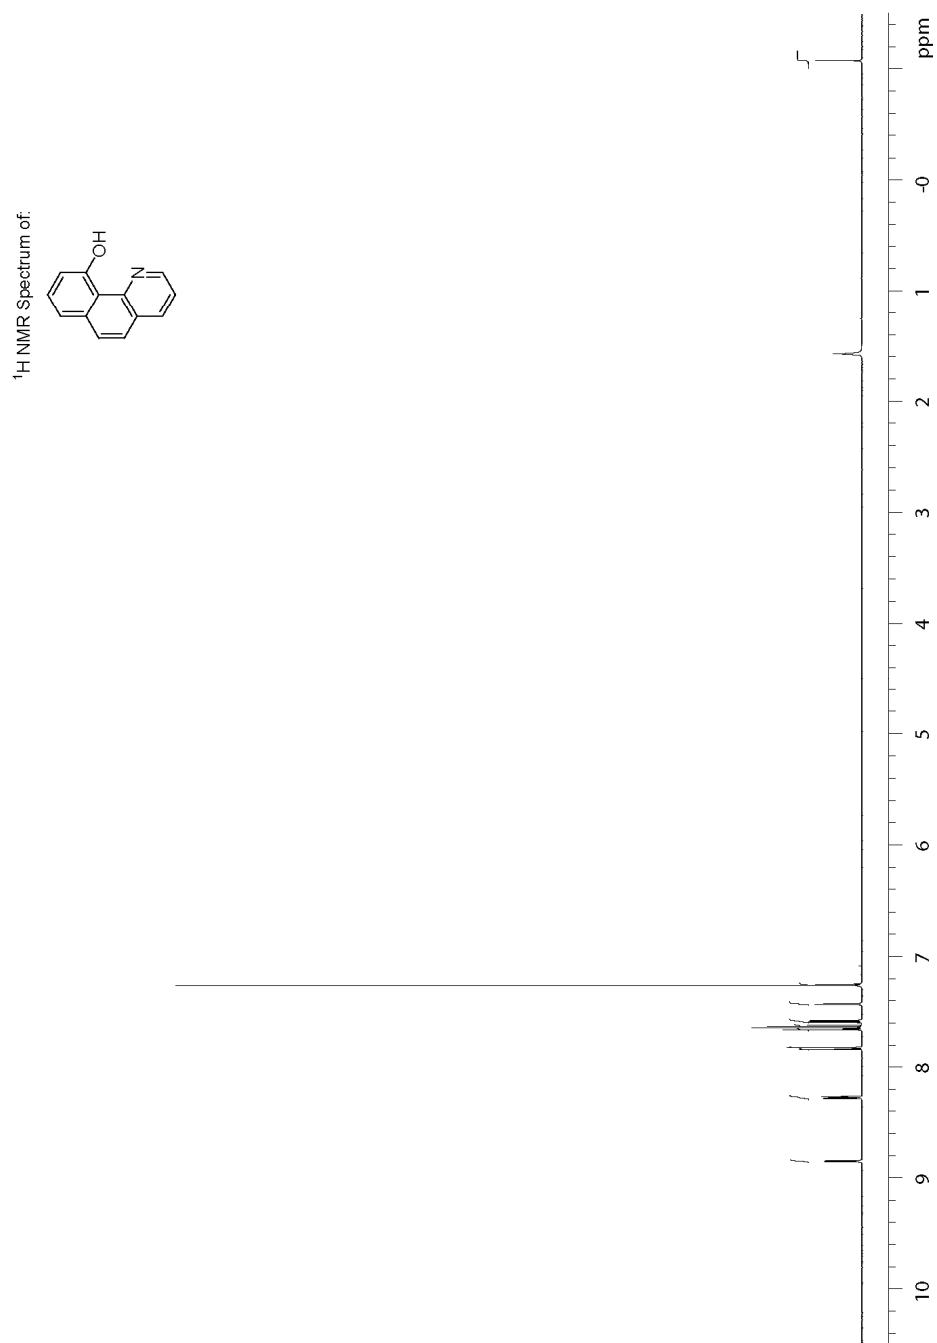

<sup>1</sup>H NMR spectrum of **S1** in CDCl<sub>3</sub> at 23 °C.

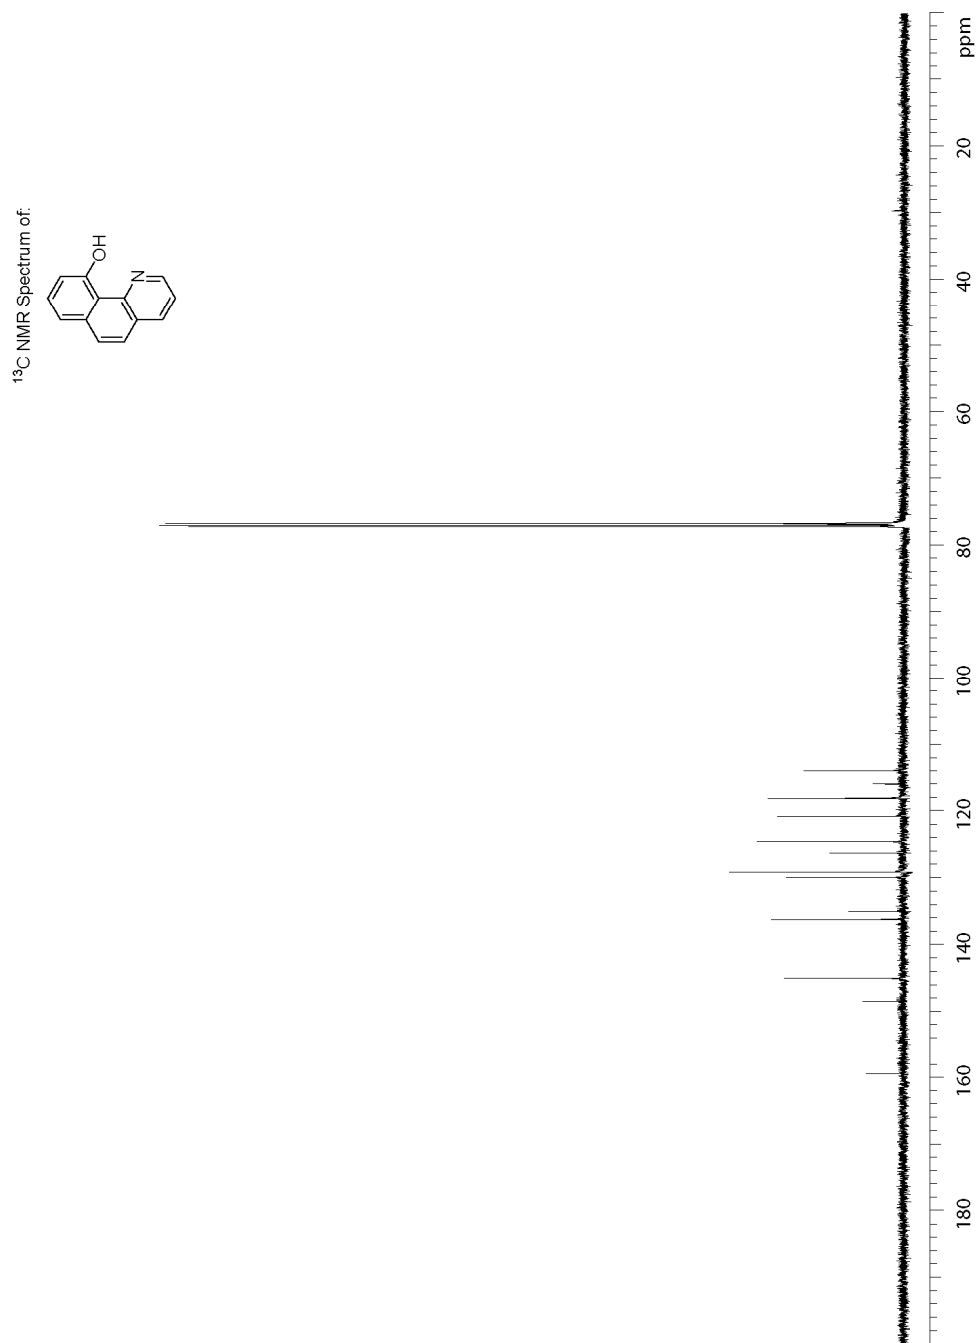

<sup>13</sup>C NMR spectrum of **S1** in CDCl<sub>3</sub> at 23 °C.

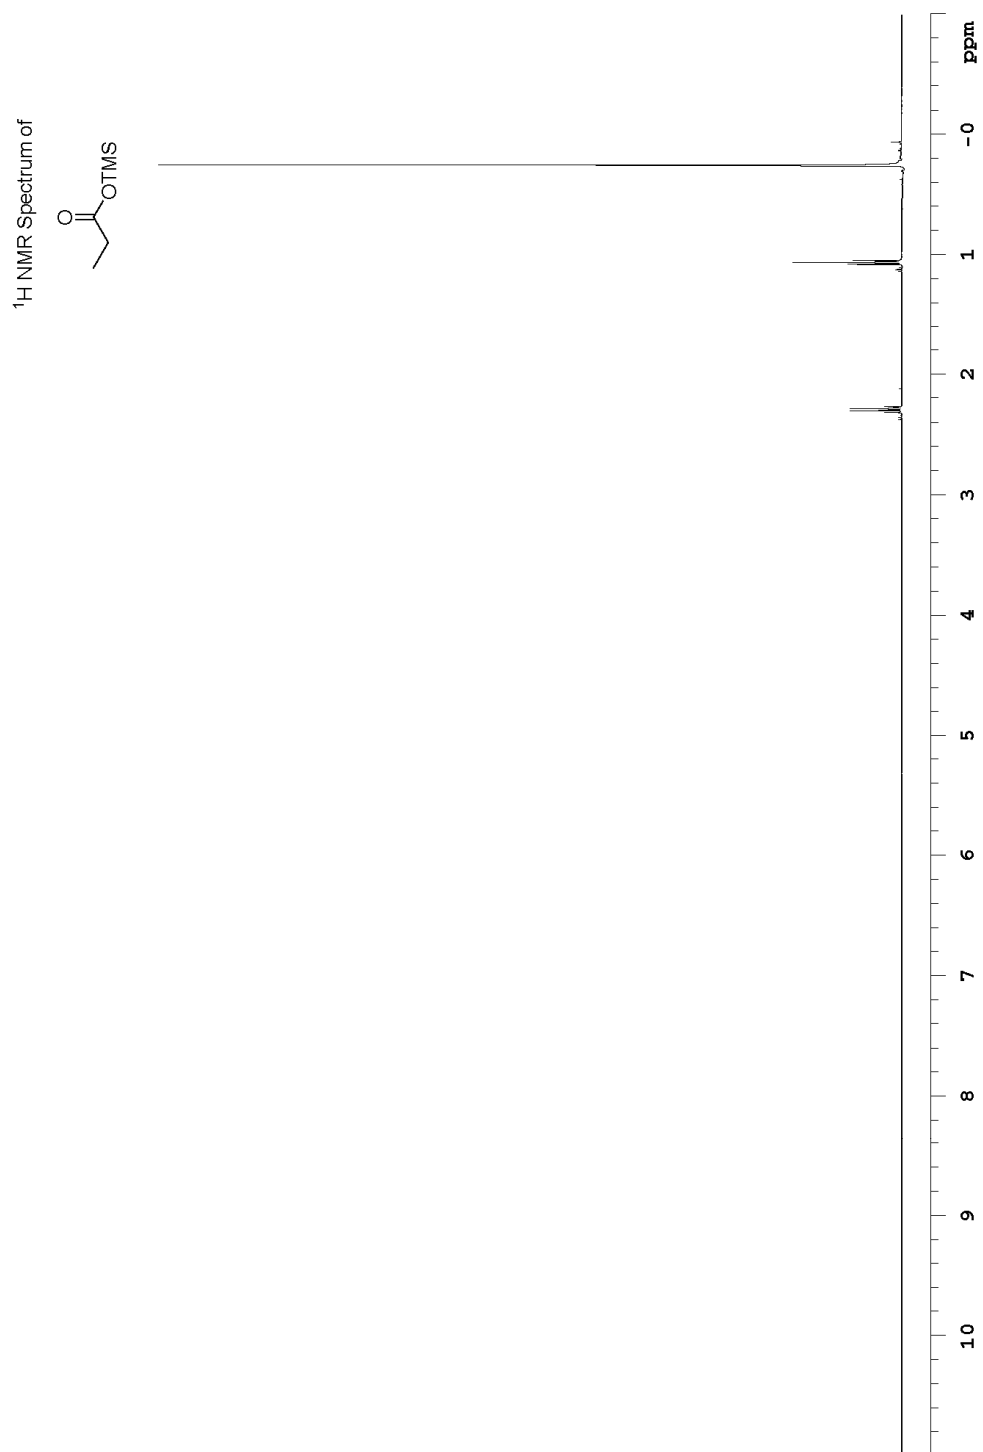

<sup>1</sup>H NMR spectrum of **S2** in CD<sub>2</sub>Cl<sub>2</sub> at 23 °C.

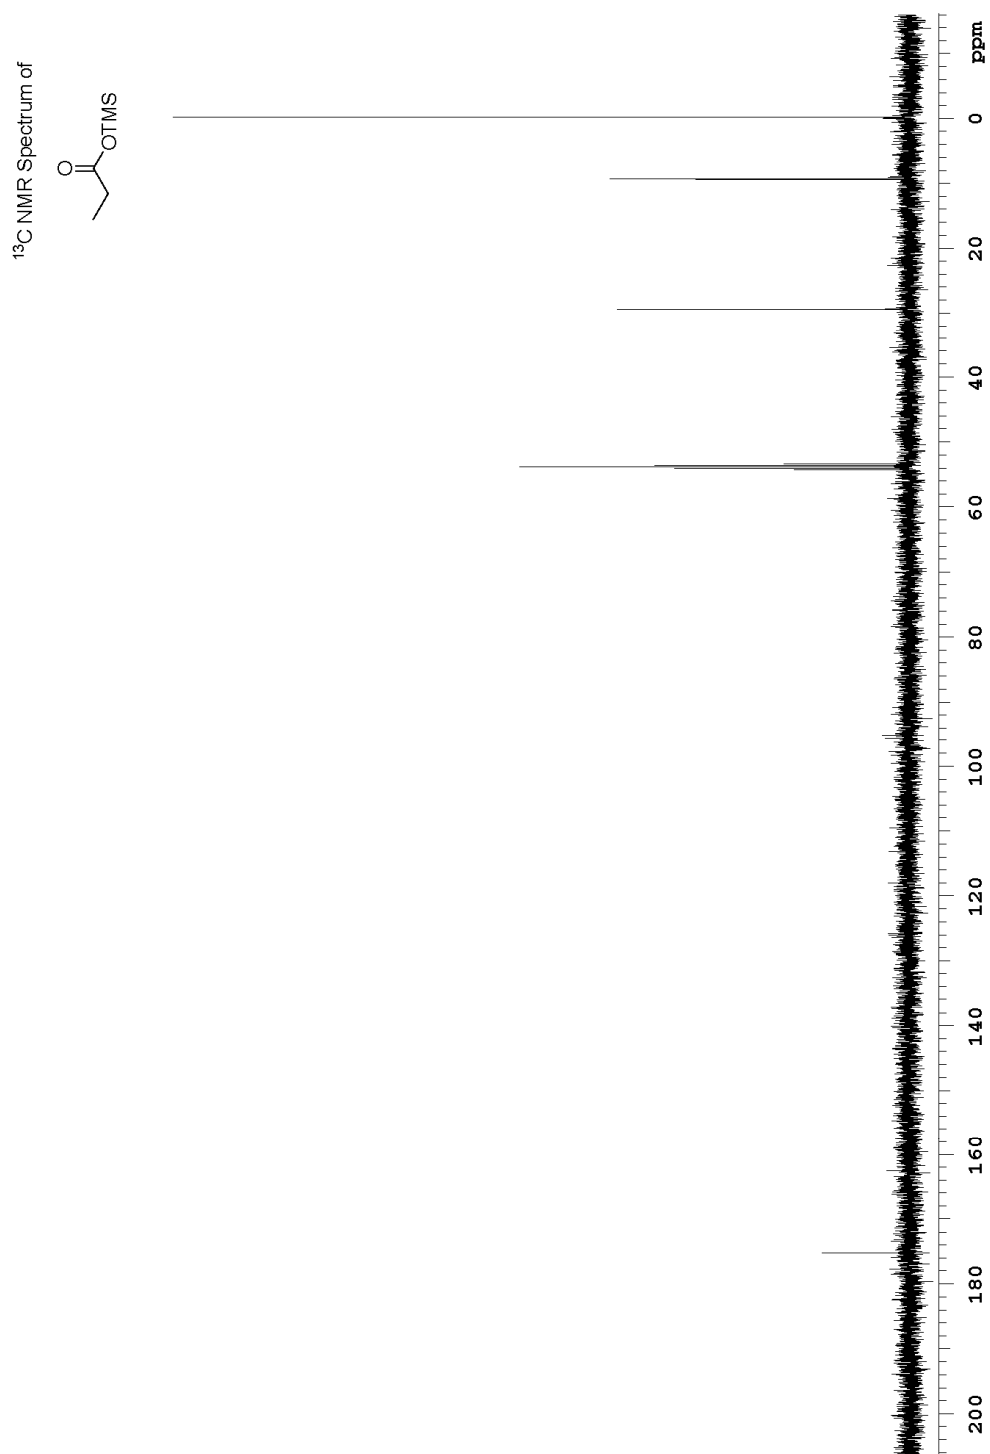

<sup>13</sup>C NMR spectrum of **S2** in CD<sub>2</sub>Cl<sub>2</sub> at 23 °C.

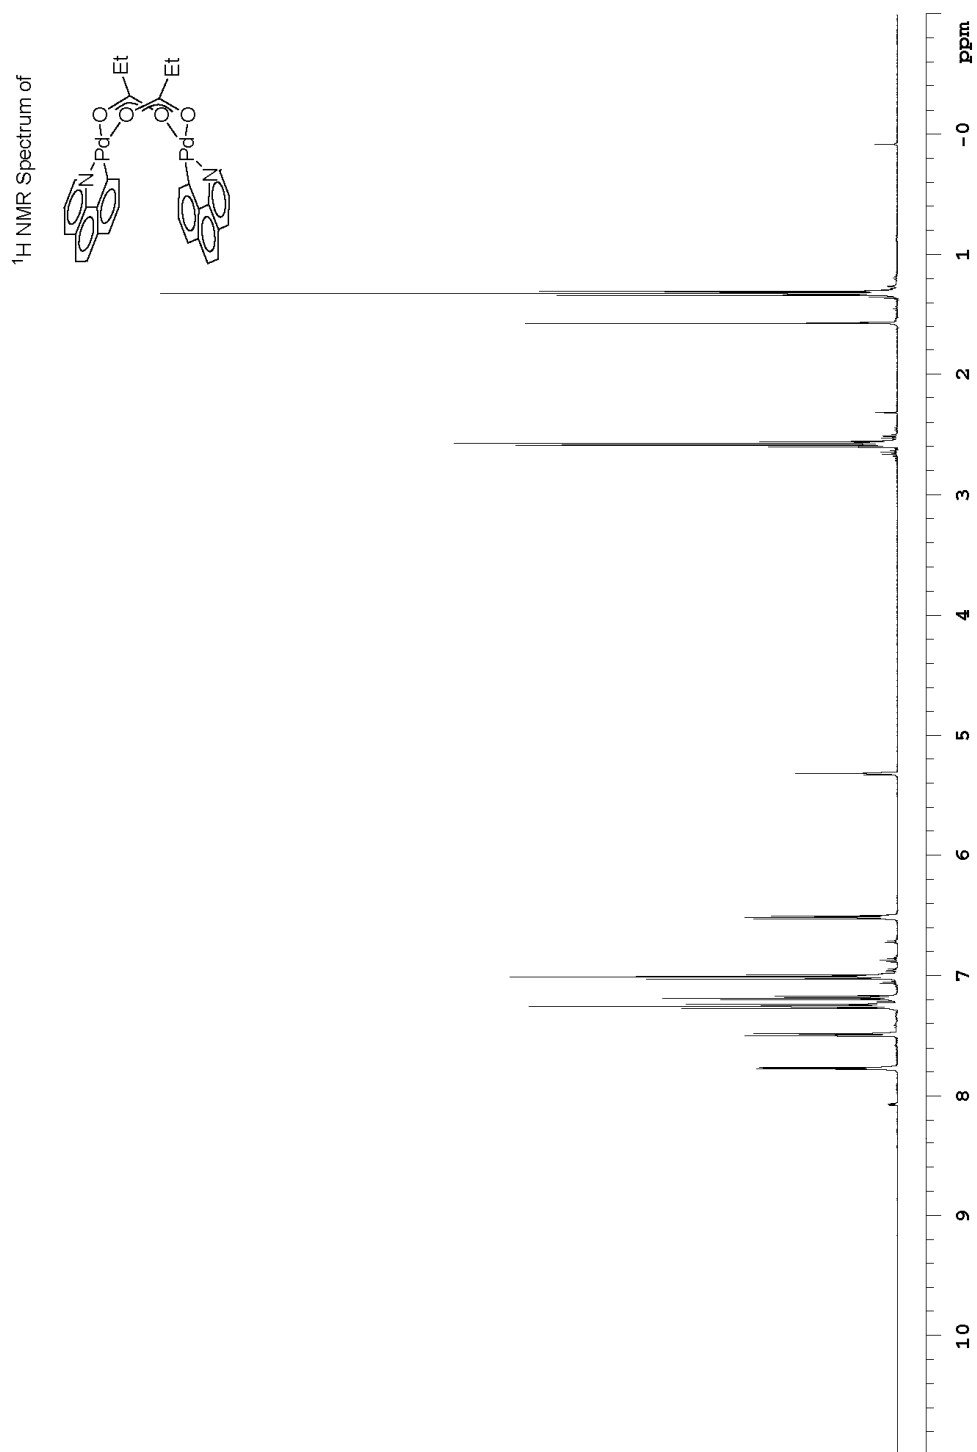

<sup>1</sup>H NMR spectrum of **S3** in CD<sub>2</sub>Cl<sub>2</sub> at 23 °C.



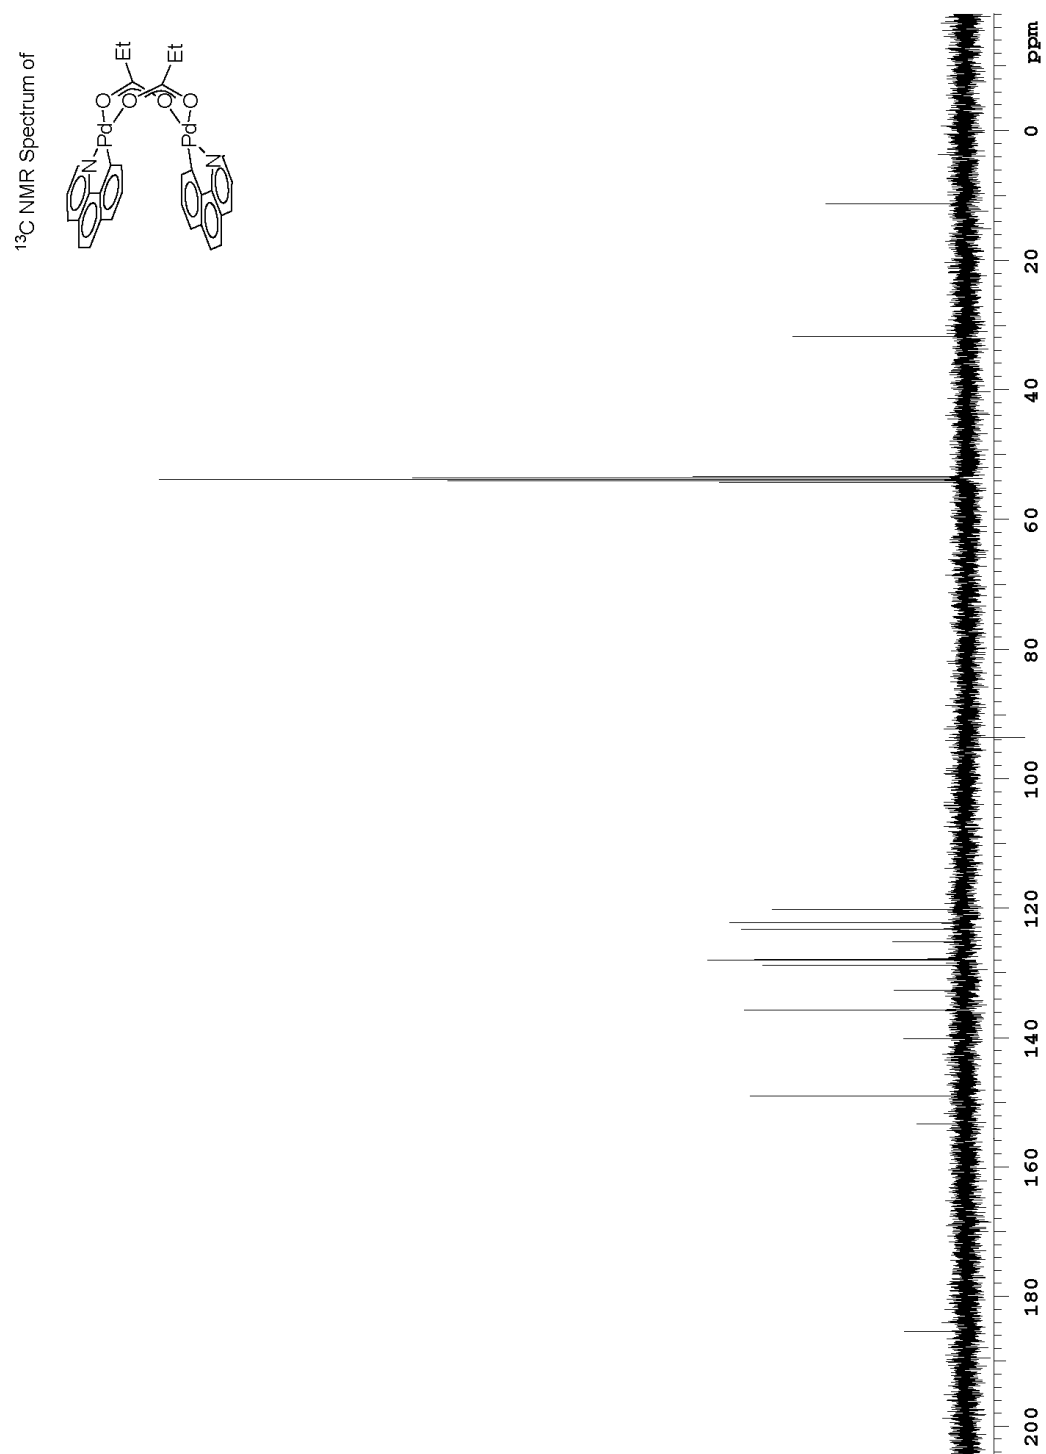

<sup>13</sup>C NMR spectrum of **S3** in CD<sub>2</sub>Cl<sub>2</sub> at 23 °C.

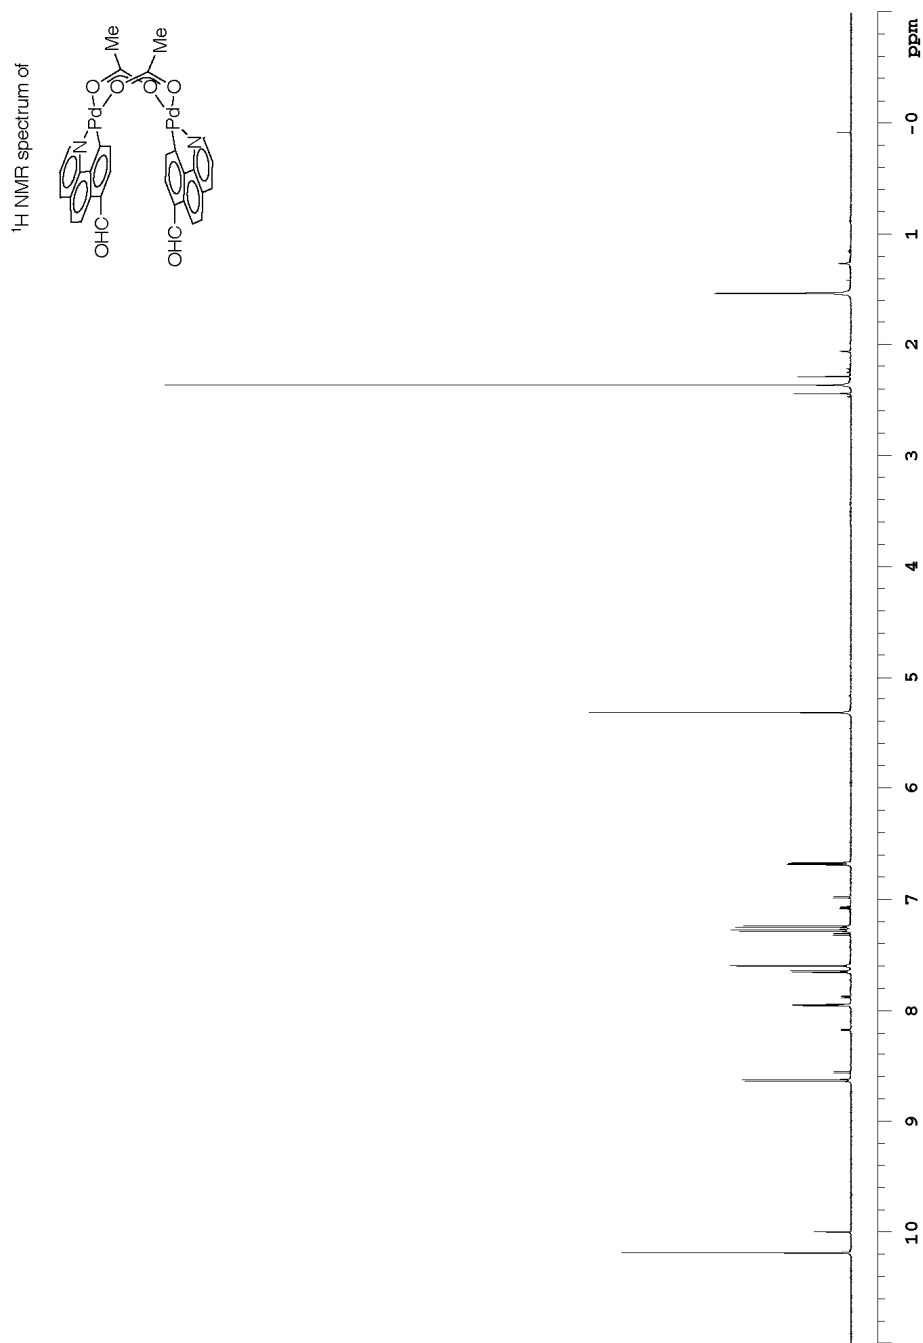

<sup>1</sup>H NMR spectrum of **S14** in CD<sub>2</sub>Cl<sub>2</sub> at 23 °C.

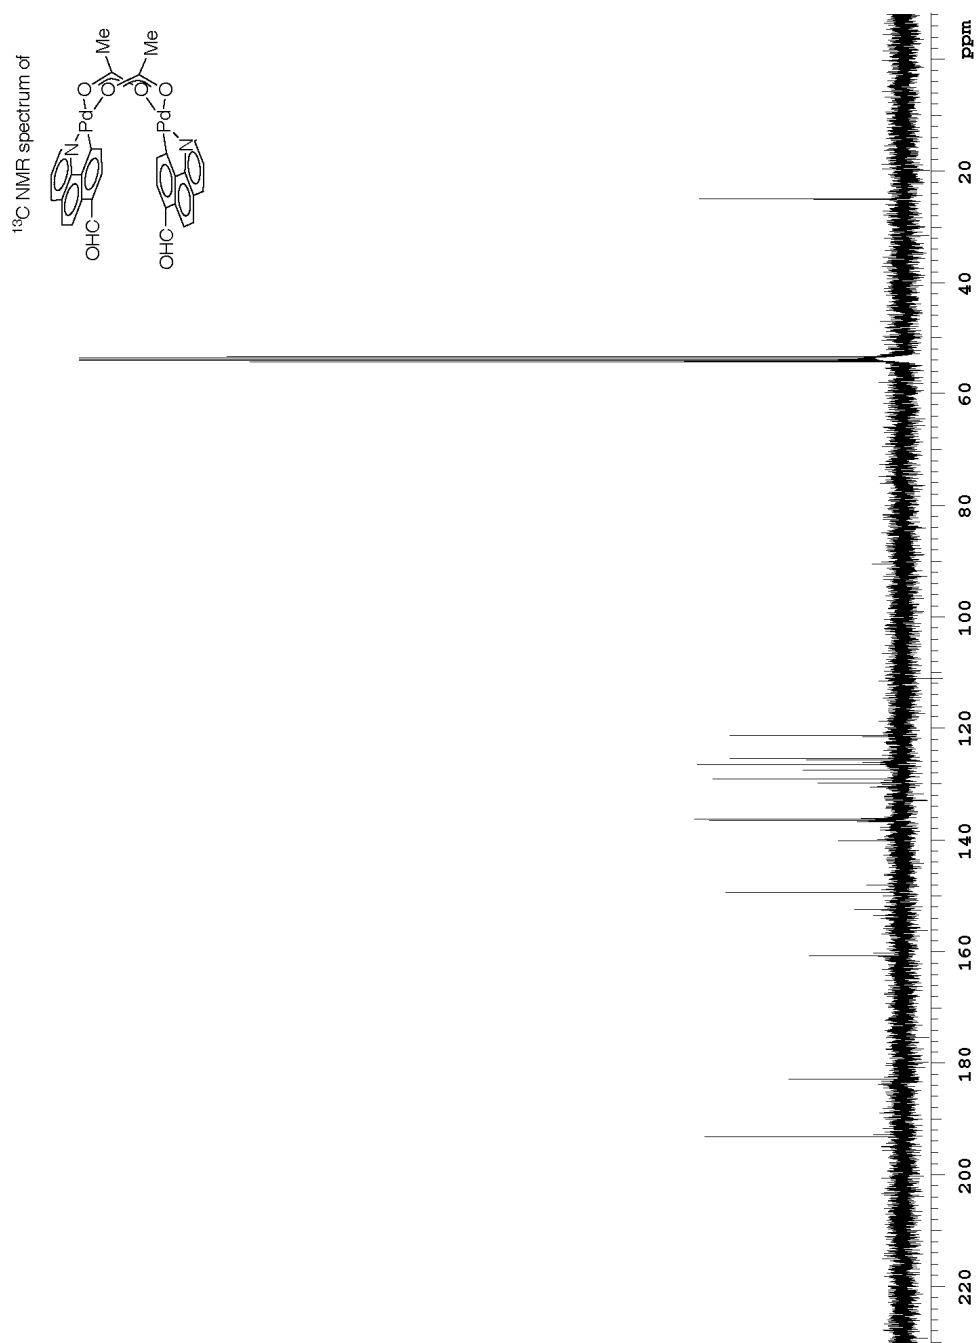

<sup>13</sup>C NMR spectrum of **S14** in CD<sub>2</sub>Cl<sub>2</sub> at 23 °C.

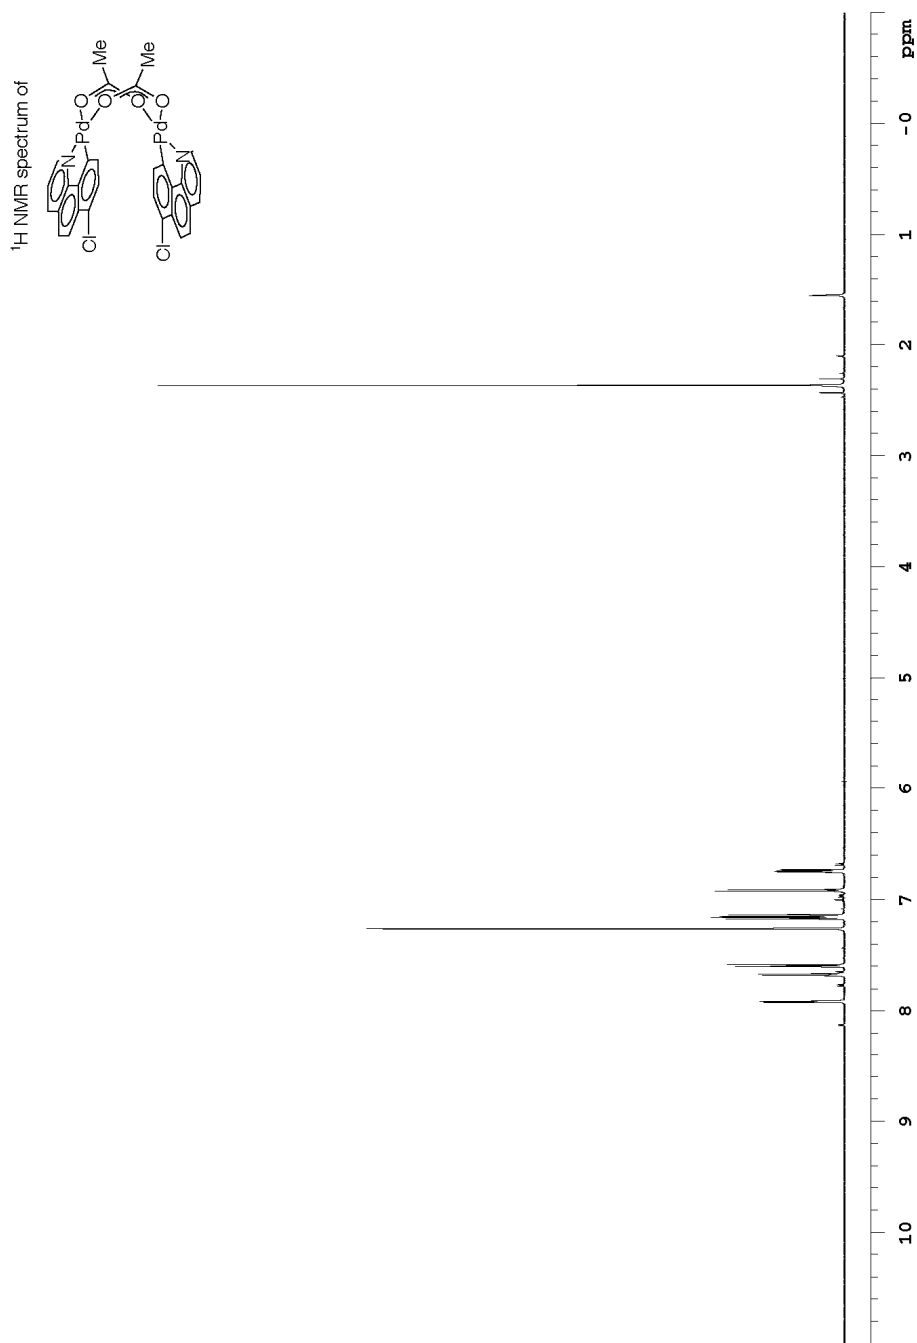

<sup>1</sup>H NMR spectrum of **S15** in CDCl<sub>3</sub> at 23 °C.

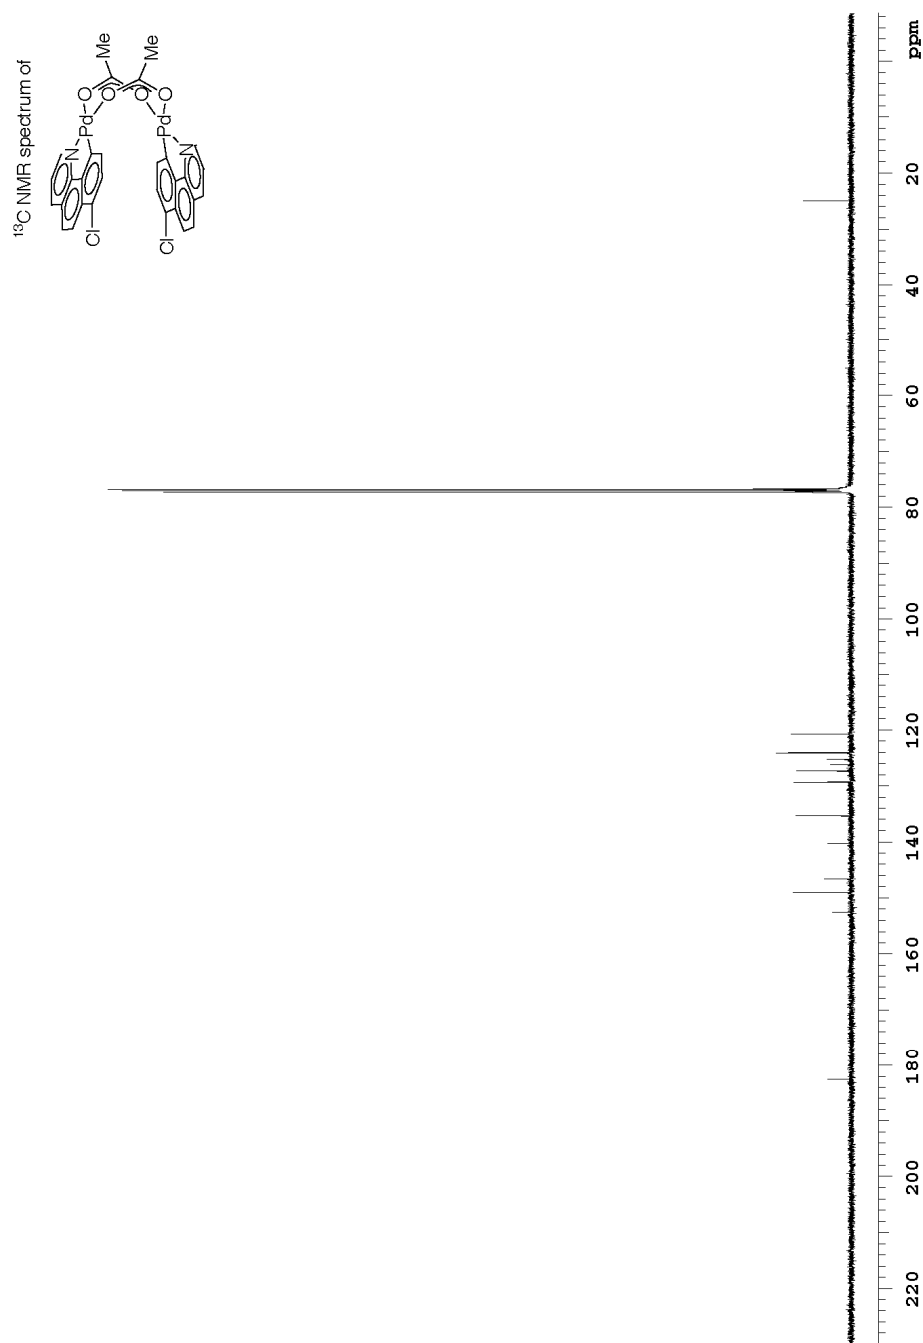

<sup>13</sup>C NMR spectrum of **S15** in CDCl<sub>3</sub> at 23 °C.

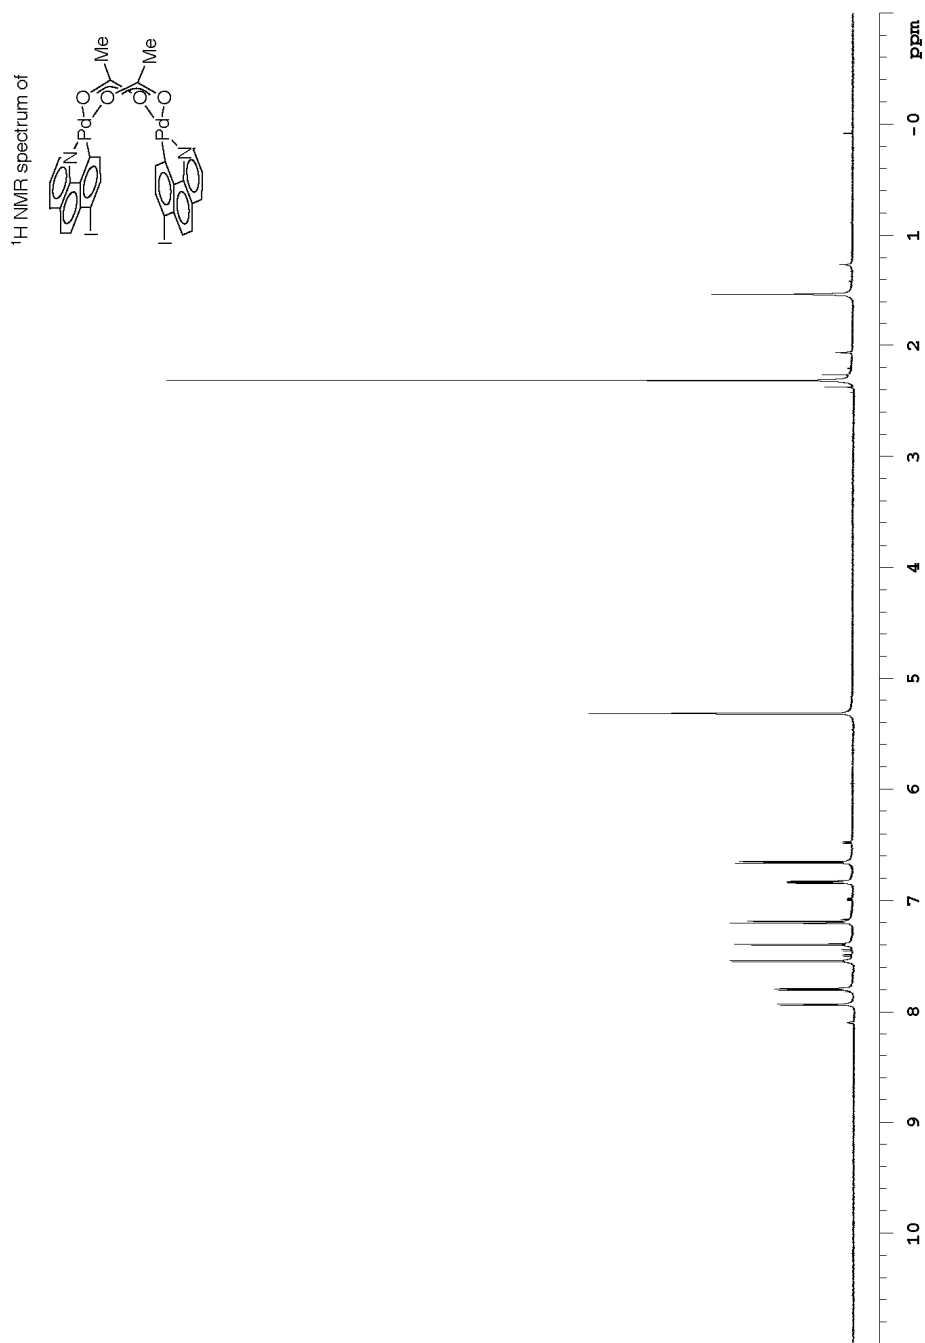

<sup>1</sup>H NMR spectrum of **S16** in CD<sub>2</sub>Cl<sub>2</sub> at 23 °C.

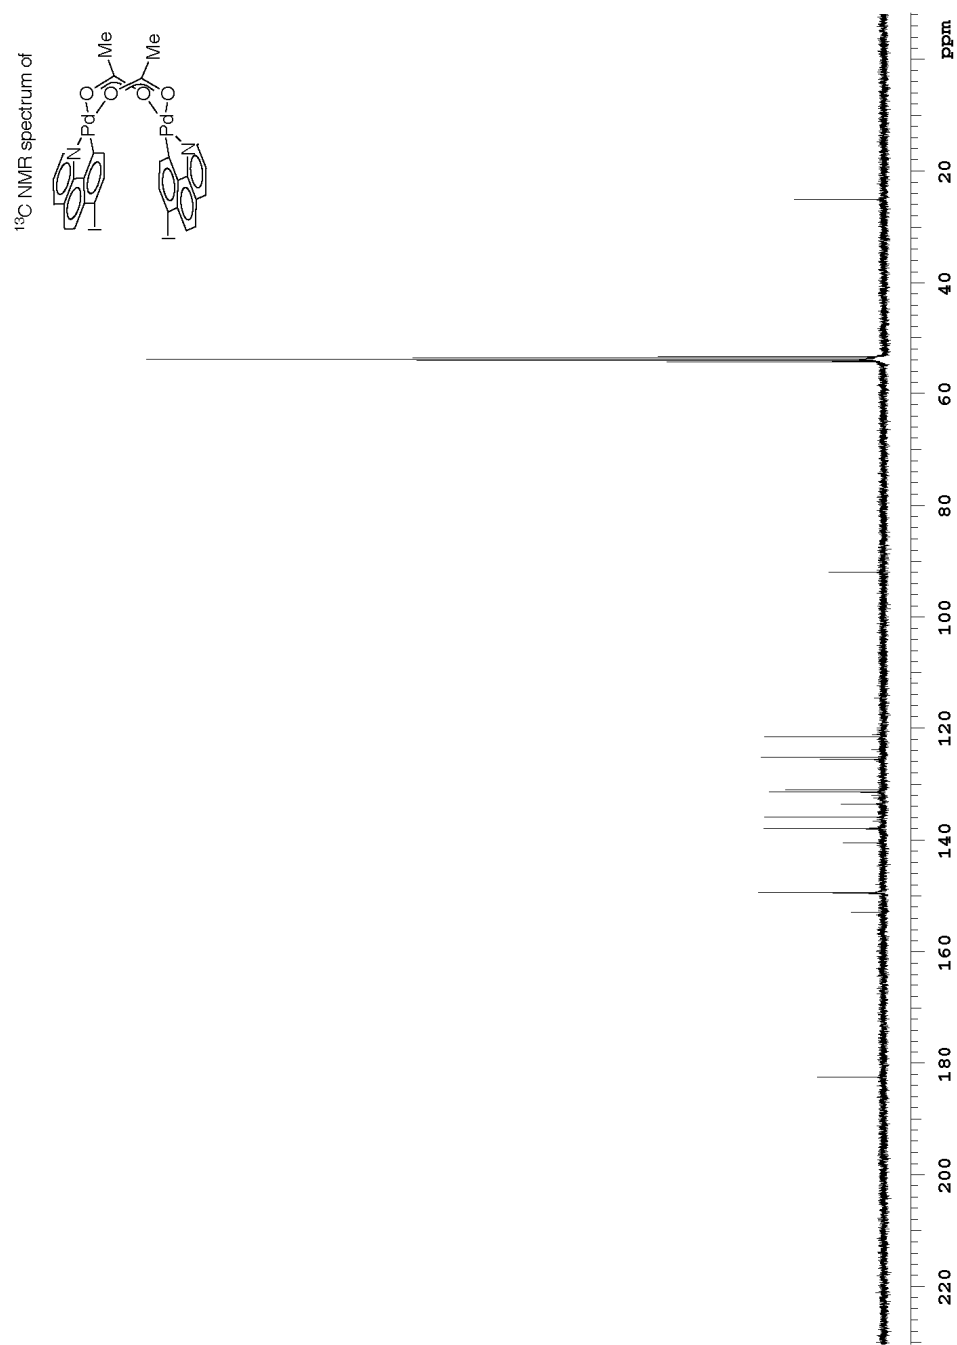

<sup>13</sup>C NMR spectrum of **S16** in CD<sub>2</sub>Cl<sub>2</sub> at 23 °C.

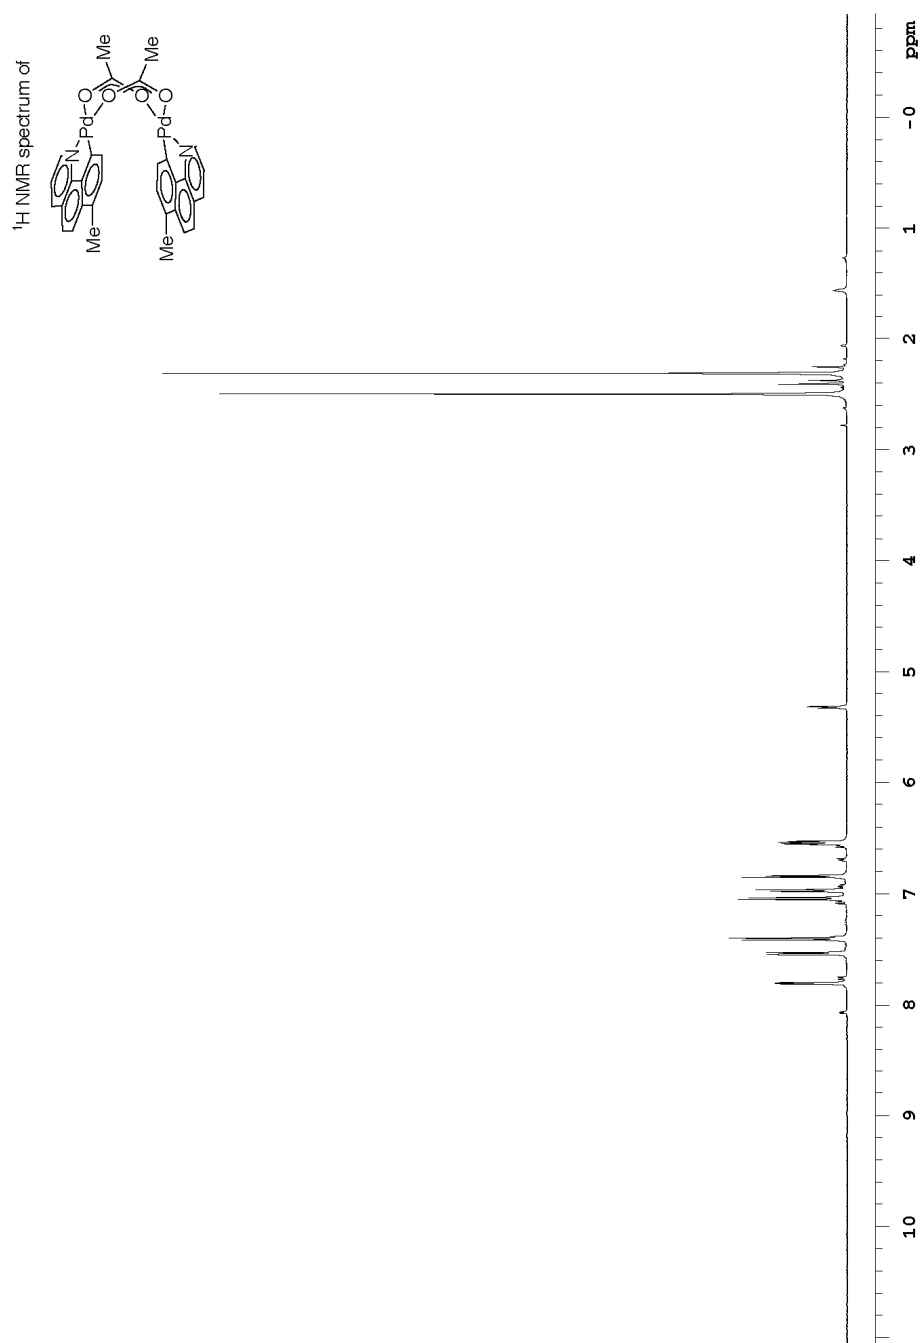

<sup>1</sup>H NMR spectrum of **S17** in CD<sub>2</sub>Cl<sub>2</sub> at 23 °C.



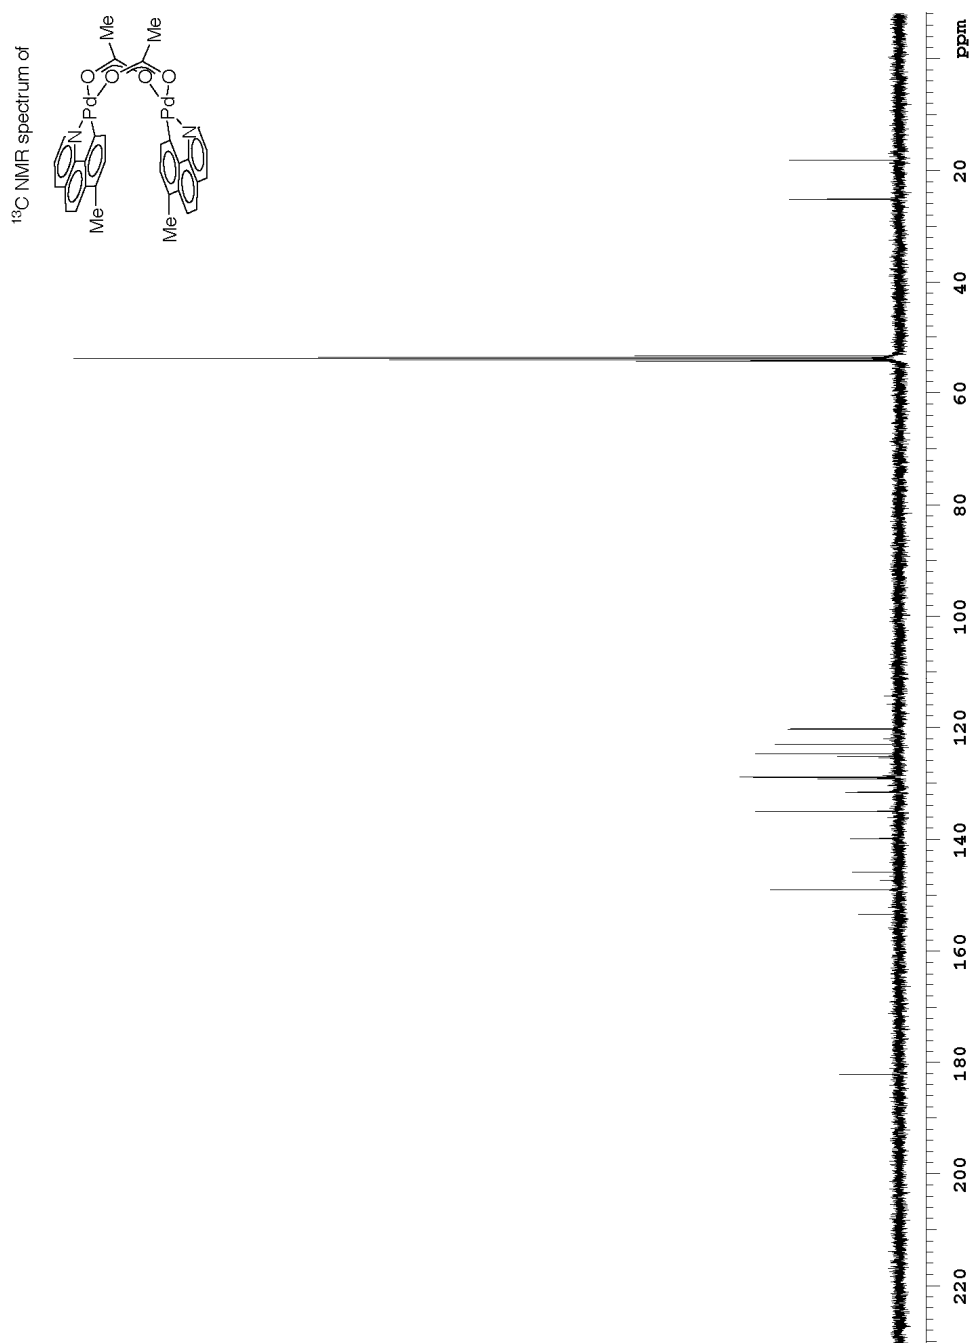

<sup>13</sup>C NMR spectrum of **S17** in CD<sub>2</sub>Cl<sub>2</sub> at 23 °C.

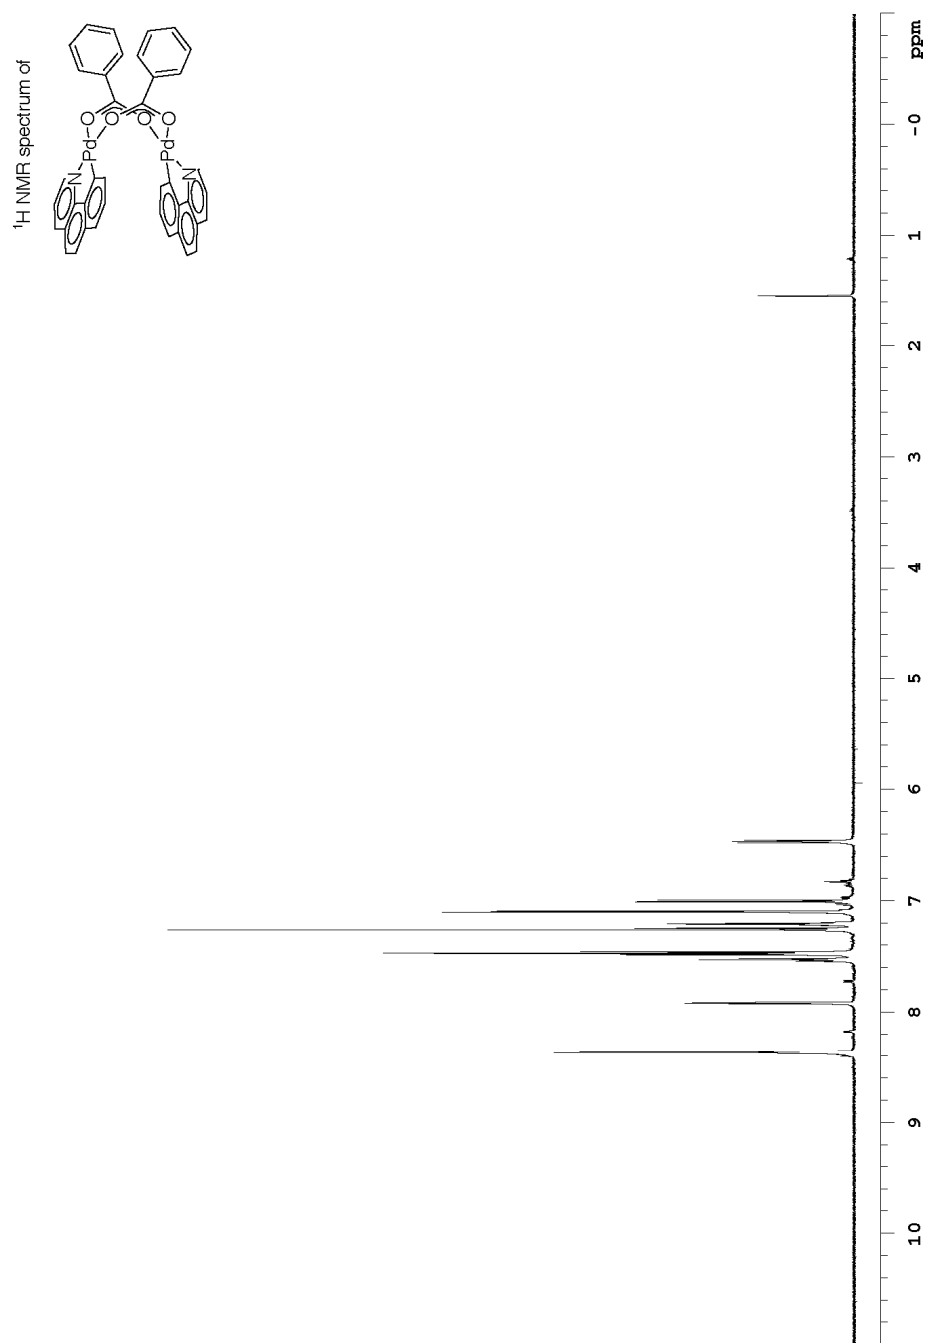

<sup>1</sup>H NMR spectrum of **S18** in CDCl<sub>3</sub> at 23 °C.

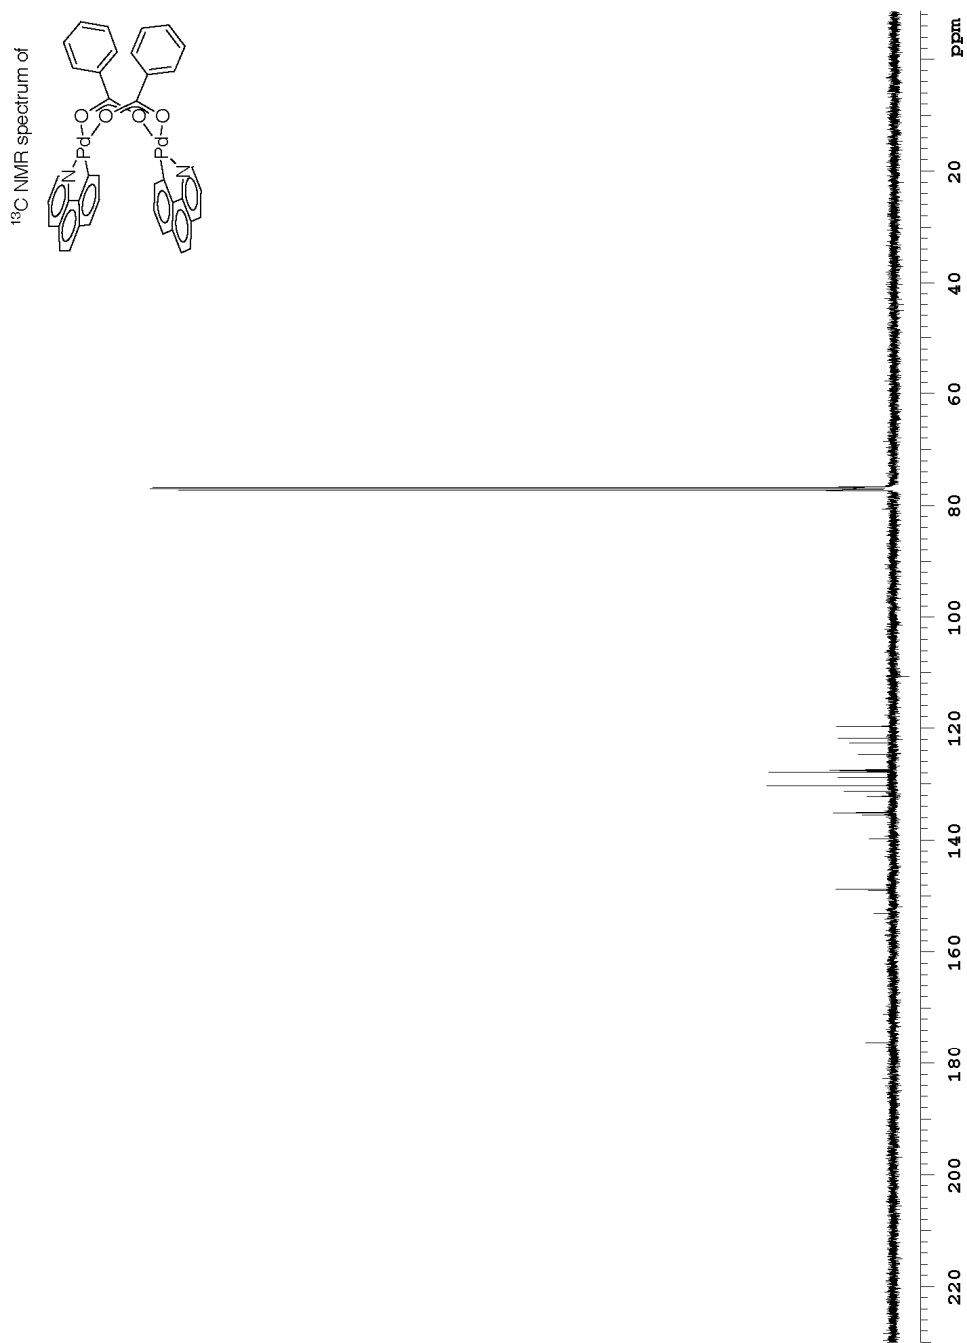

<sup>13</sup>C NMR spectrum of **S18** in CDCl<sub>3</sub> at 23 °C.

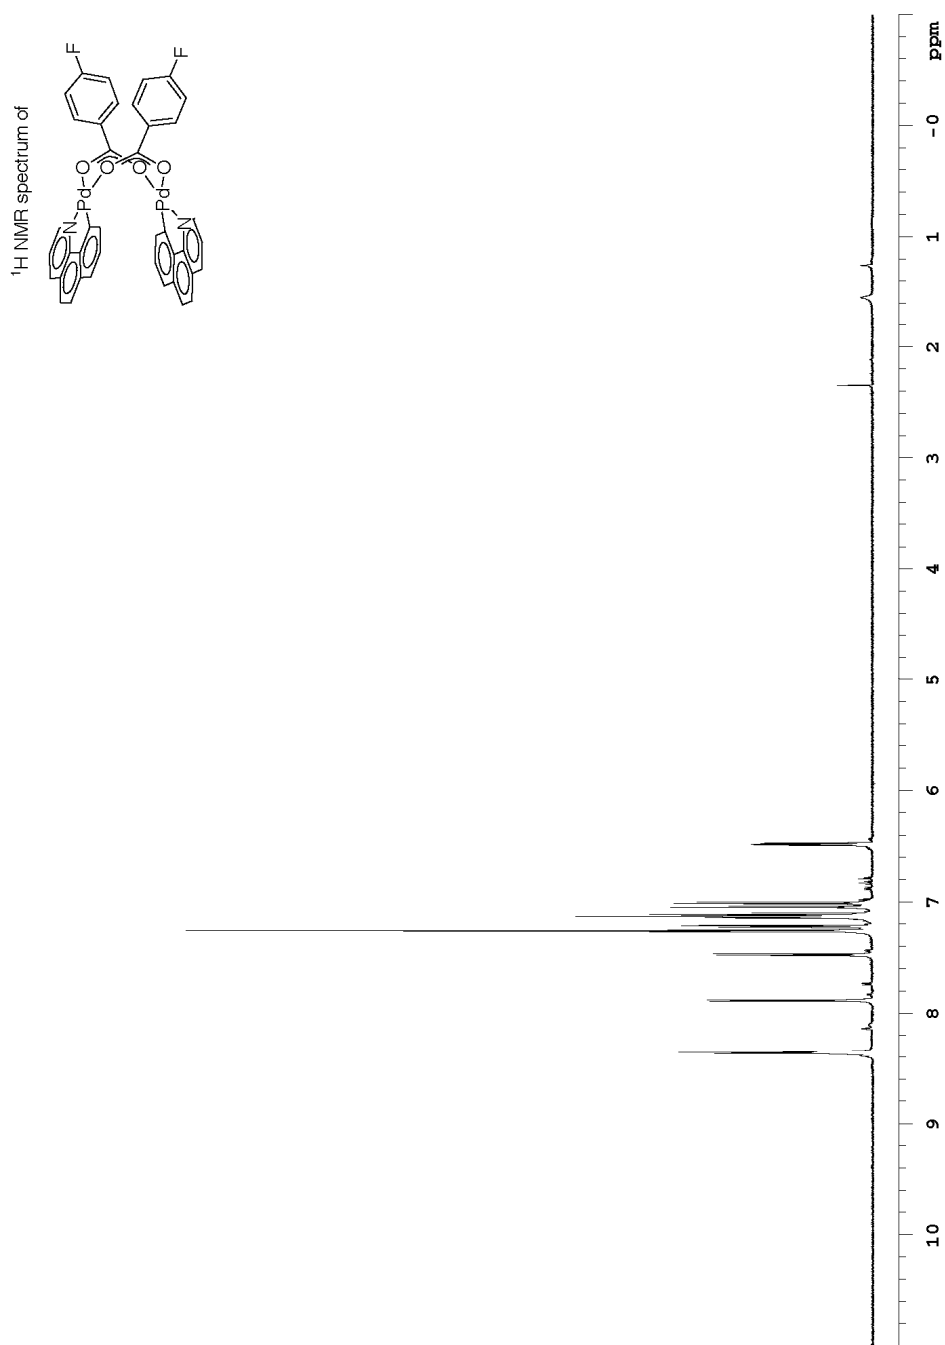

<sup>1</sup>H NMR spectrum of **S19** in CDCl<sub>3</sub> at 23 °C.

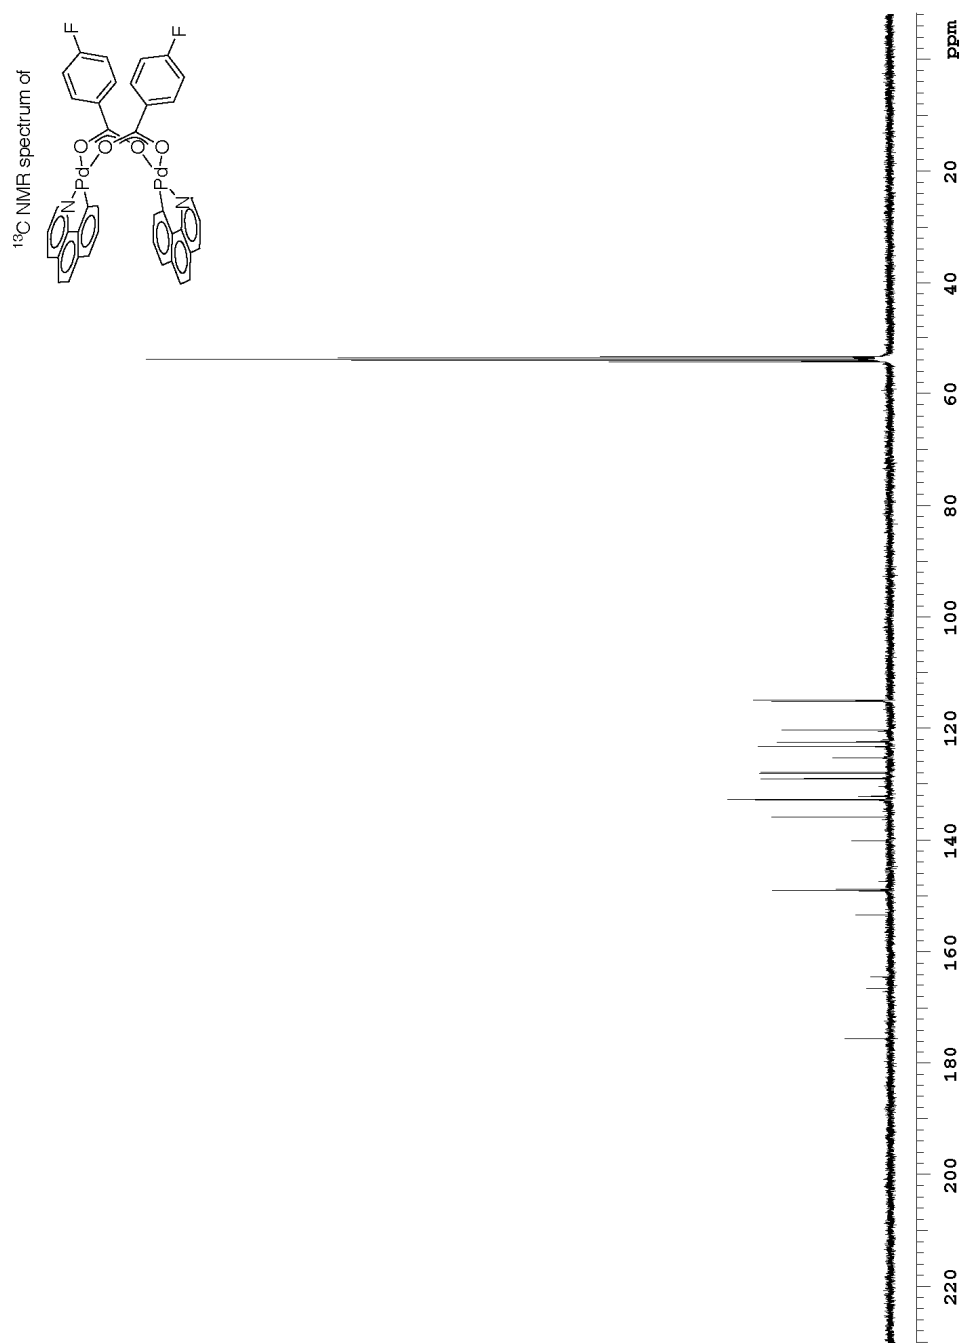

<sup>13</sup>C NMR spectrum of **S19** in CD<sub>2</sub>Cl<sub>2</sub> at 23 °C.

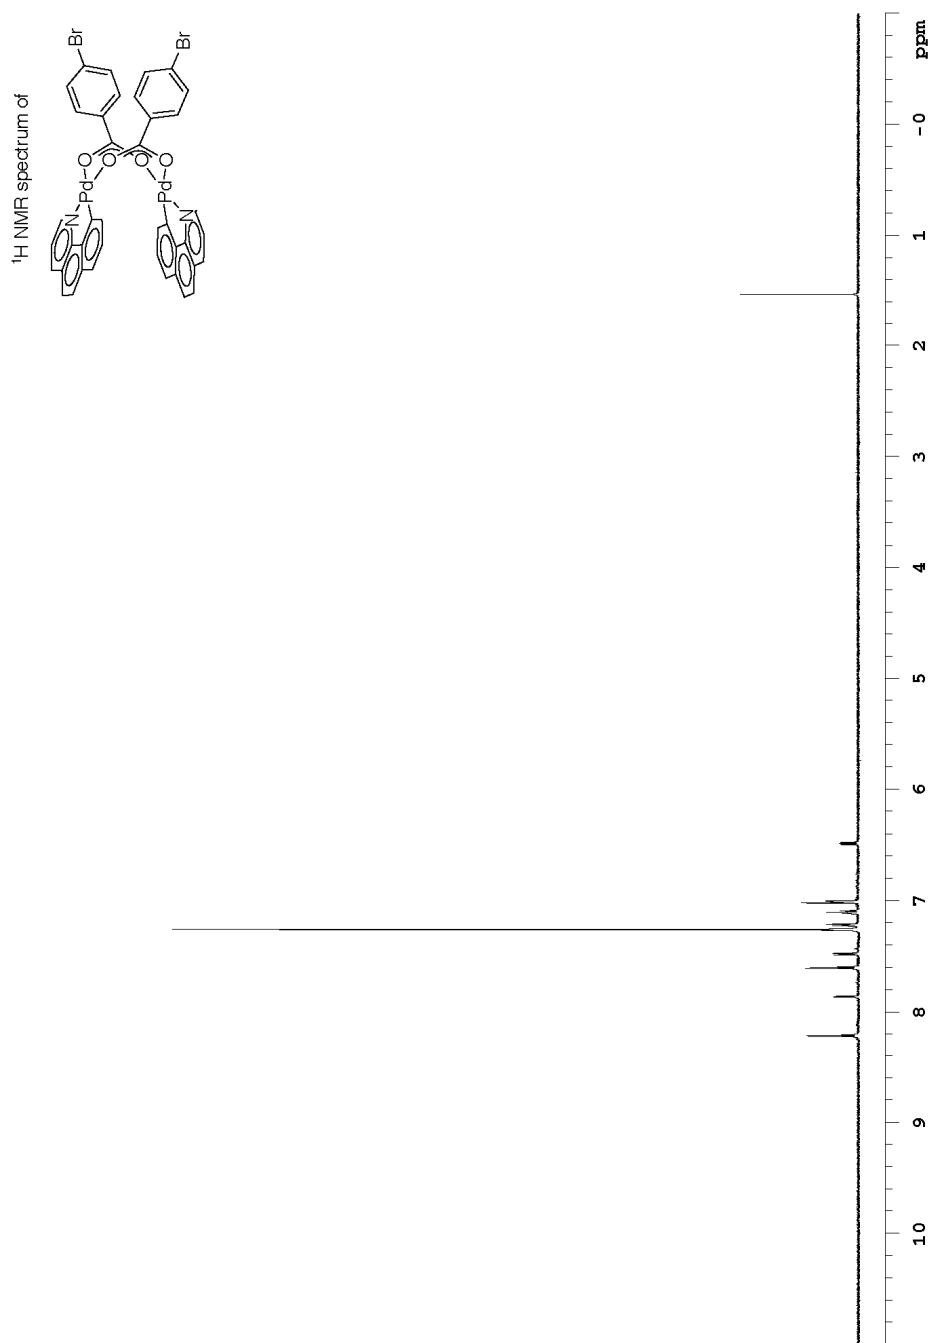

<sup>1</sup>H NMR spectrum of **S20** in CDCl<sub>3</sub> at 23 °C.

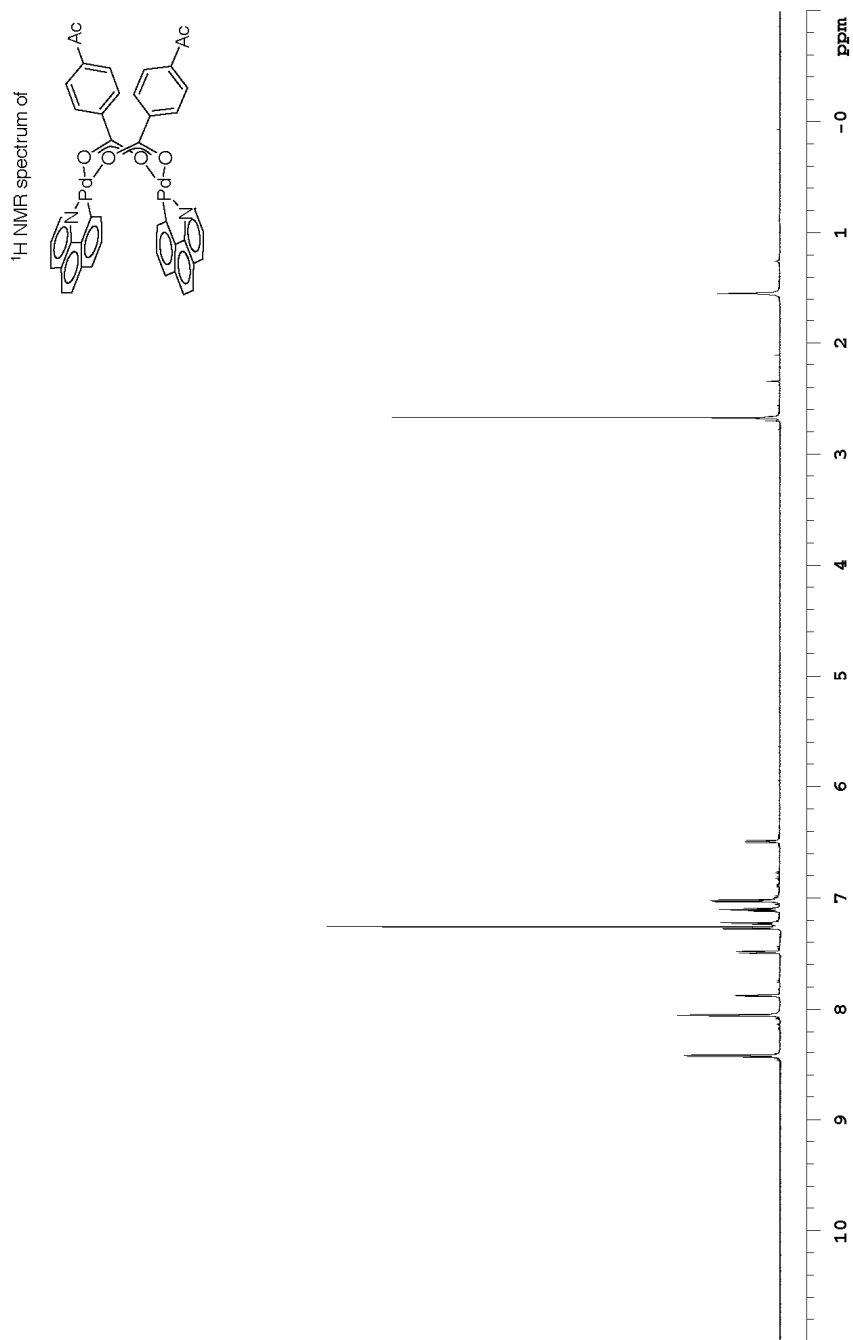

<sup>1</sup>H NMR spectrum of **S21** in CDCl<sub>3</sub> at 23 °C.

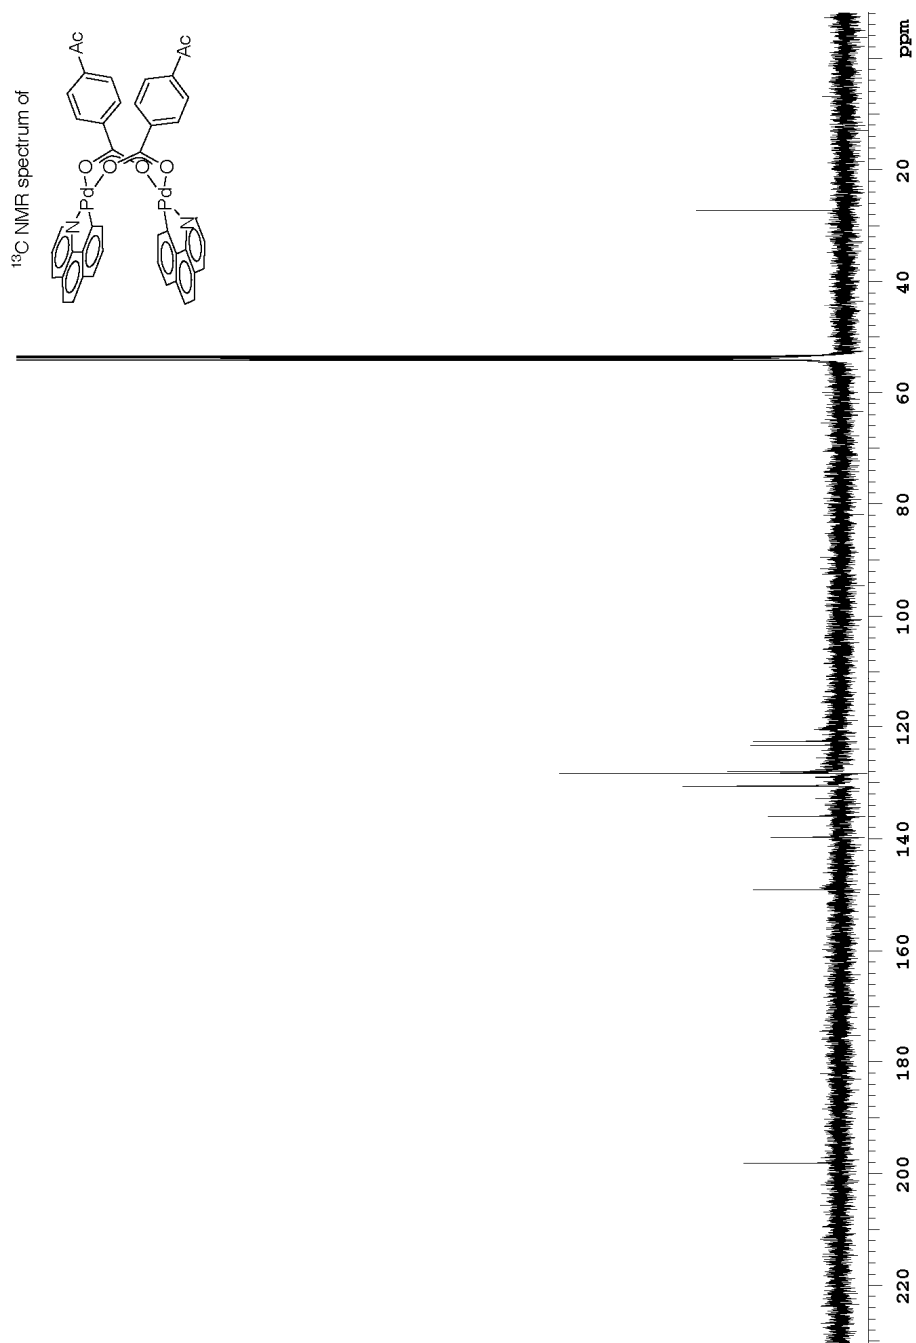

<sup>13</sup>C NMR spectrum of **S21** in CD<sub>2</sub>Cl<sub>2</sub> at 23 °C.



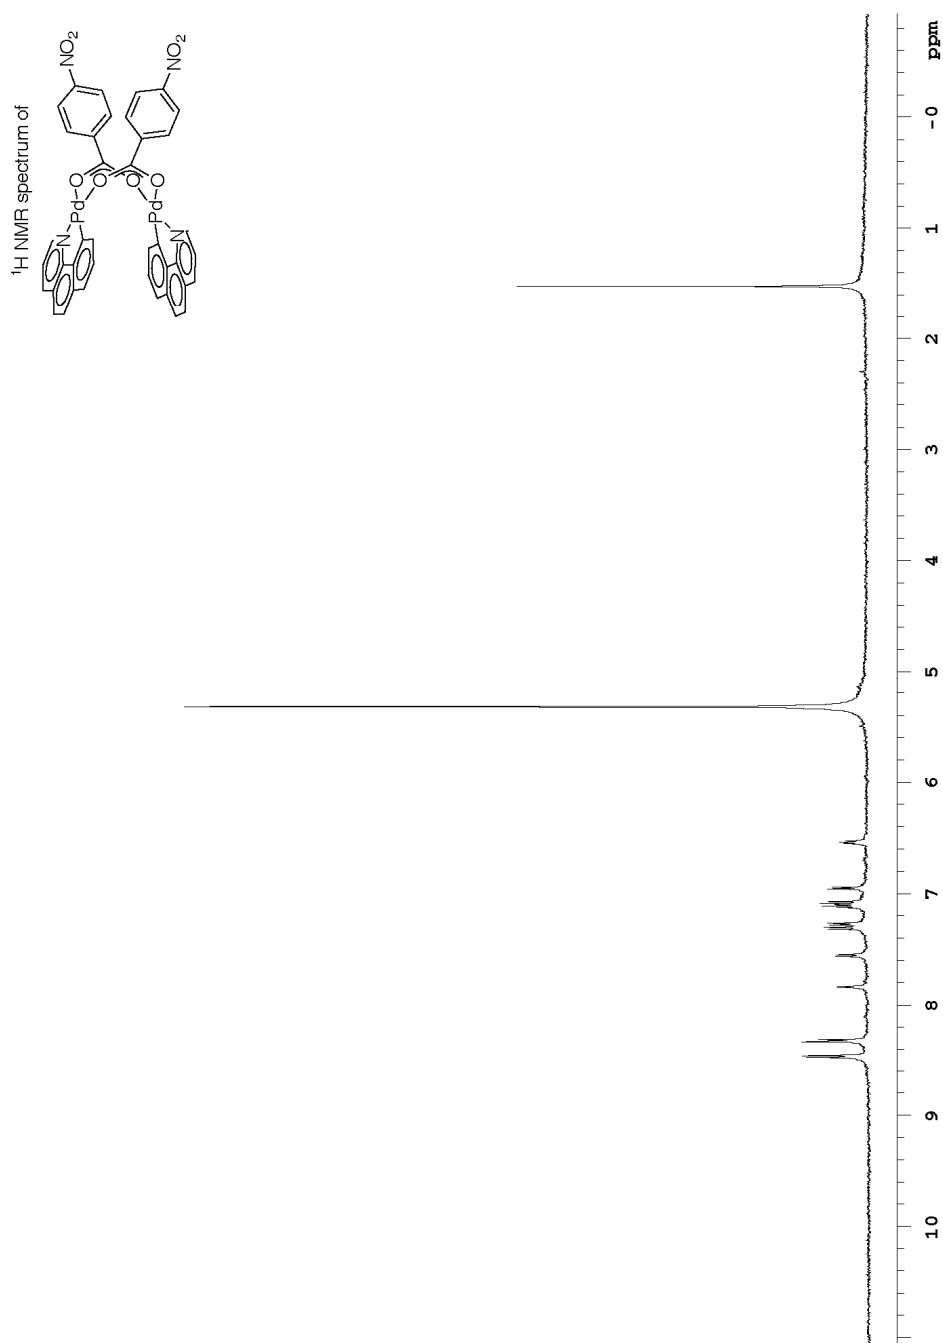

<sup>1</sup>H NMR spectrum of **S22** in CD<sub>2</sub>Cl<sub>2</sub> at 23 °C.

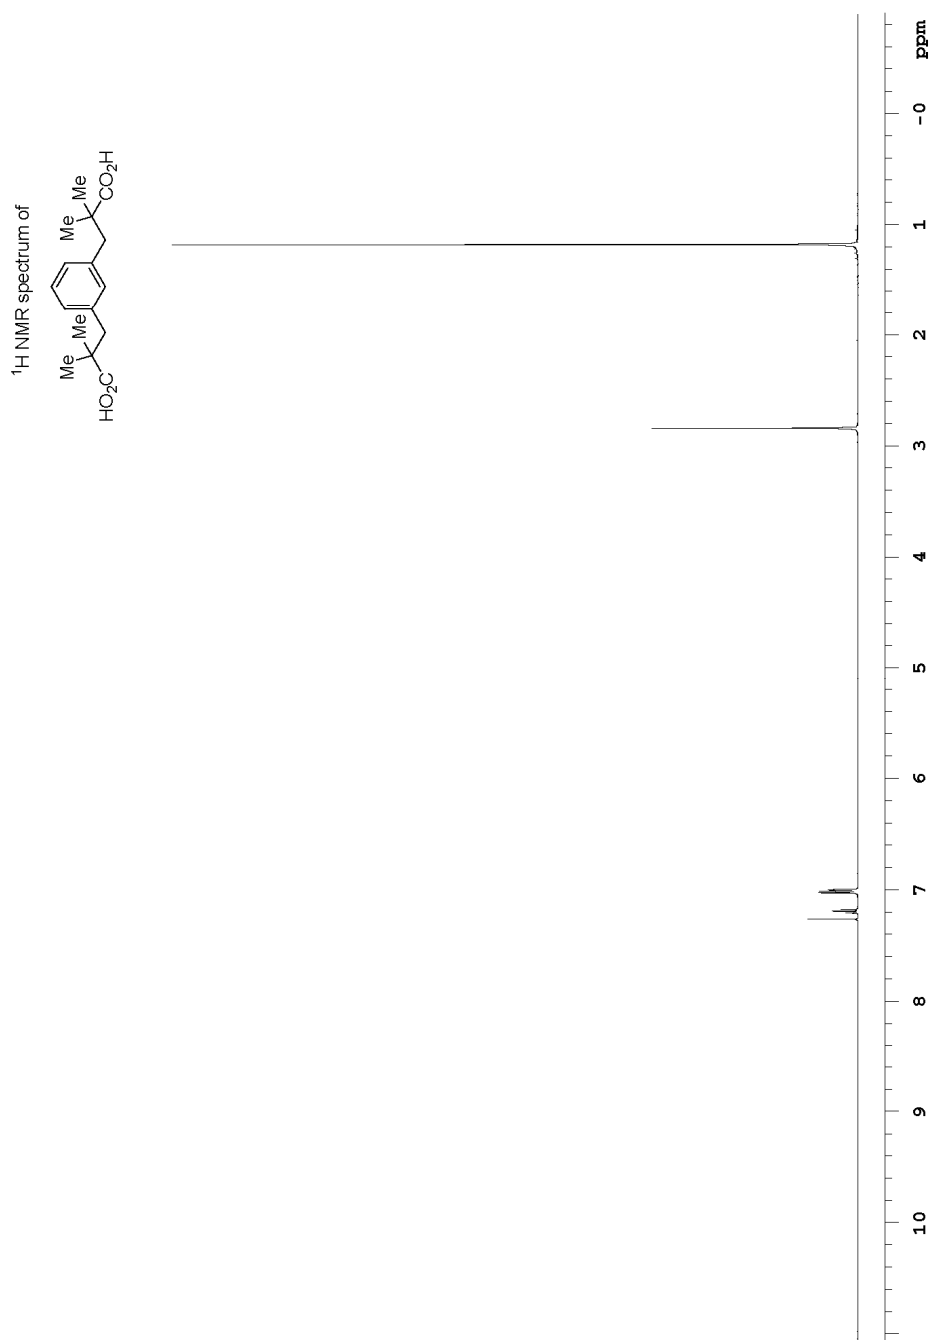

<sup>1</sup>H NMR spectrum of **S26** in CDCl<sub>3</sub> at 23 °C.

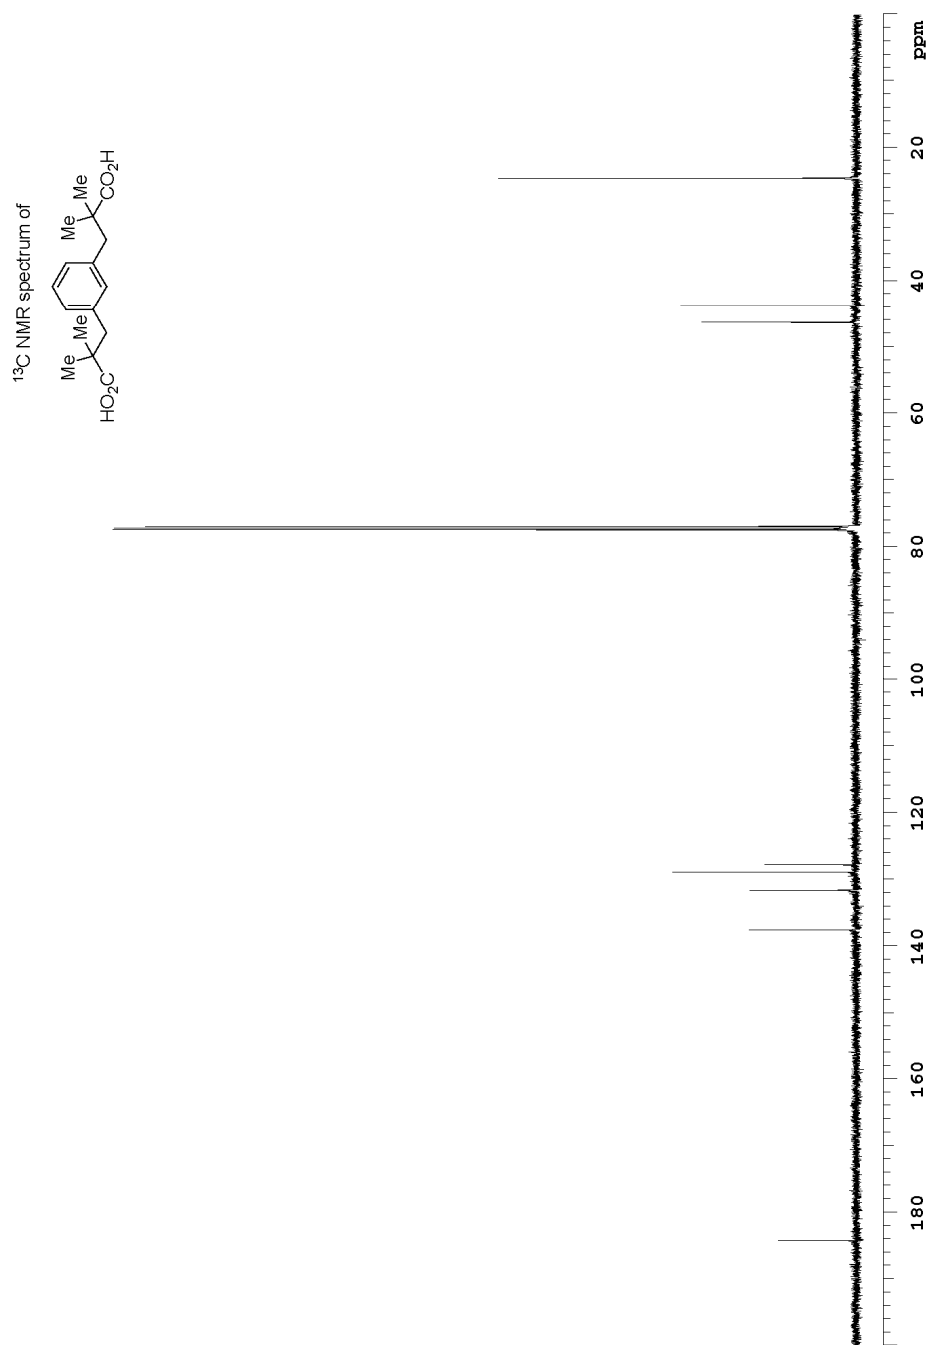

<sup>13</sup>C NMR spectrum of **S26** in CDCl<sub>3</sub> at 23 °C.

## Appendix B: UV vis Data

### UV-VIS Spectrum of **9**

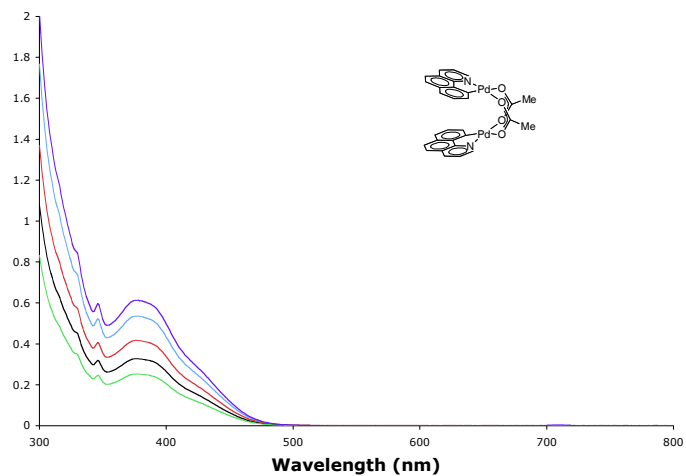

### Molar Absorptivity Determinations

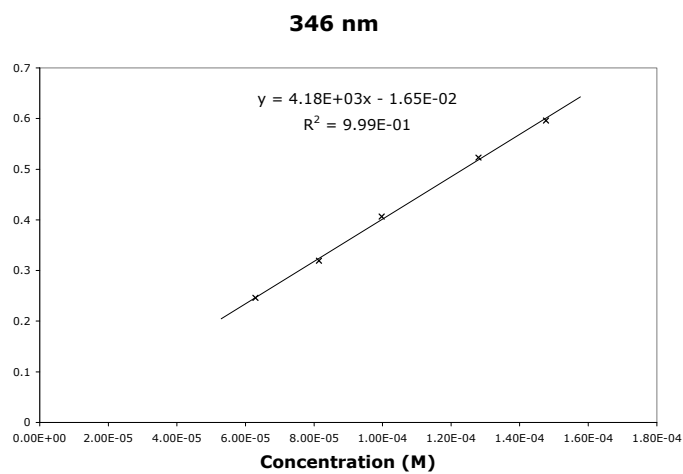

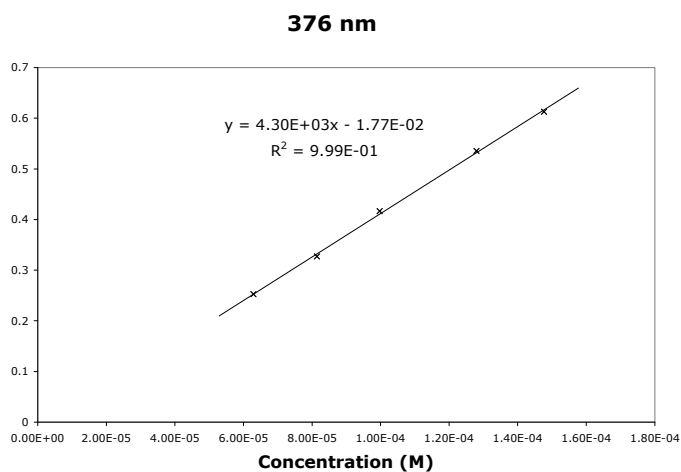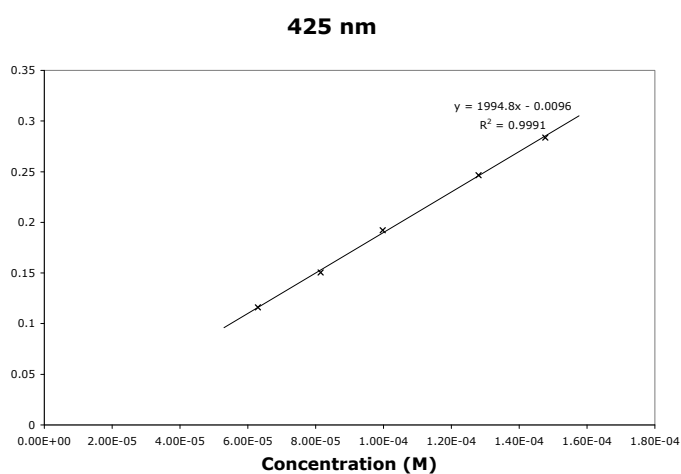

### UV-VIS Spectrum of S14

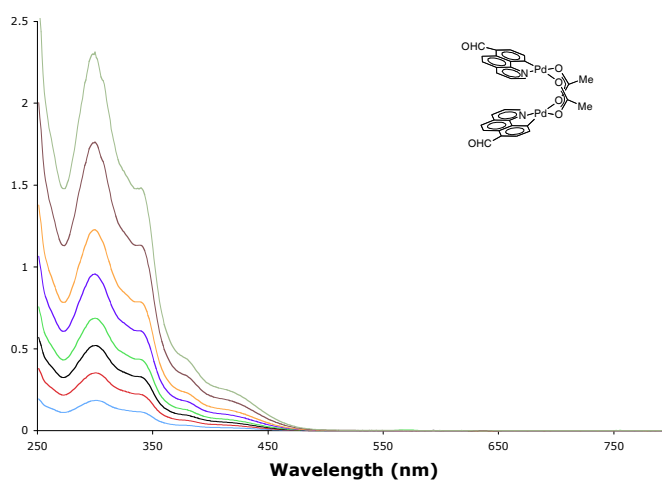

### Molar Absorptivity Determinations

**300 nm**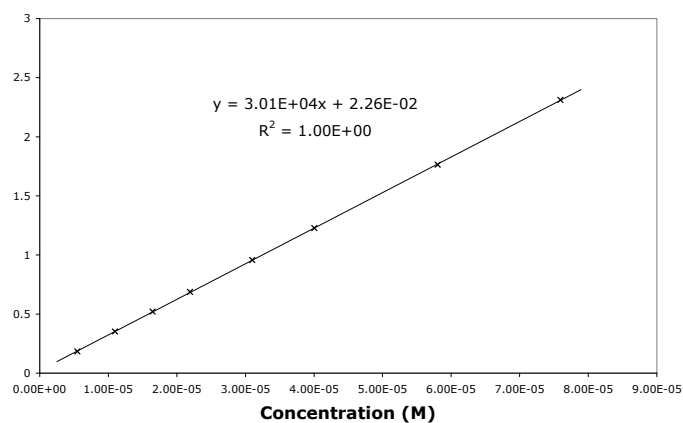**340 nm**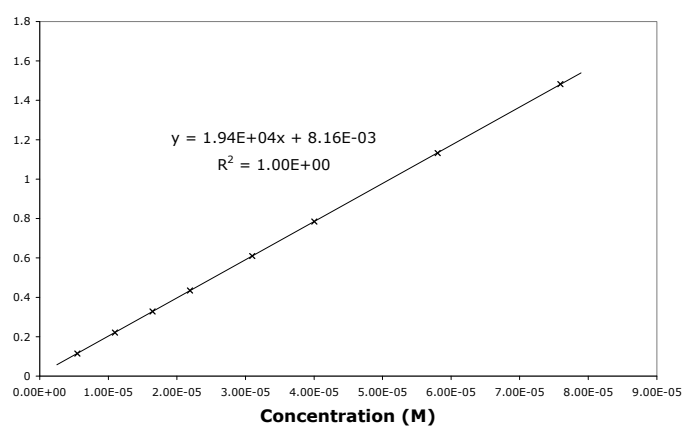**379 nm**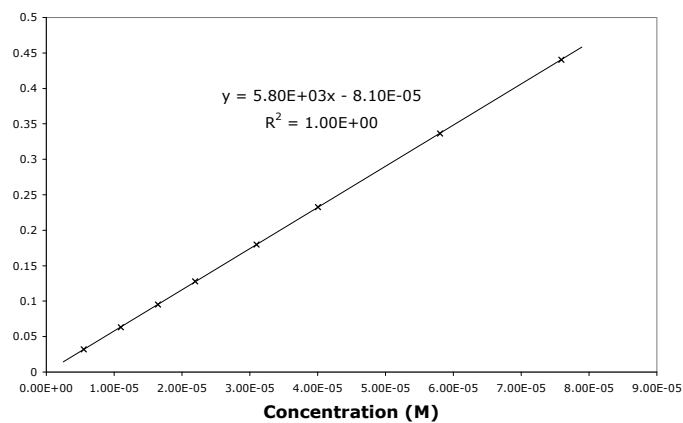

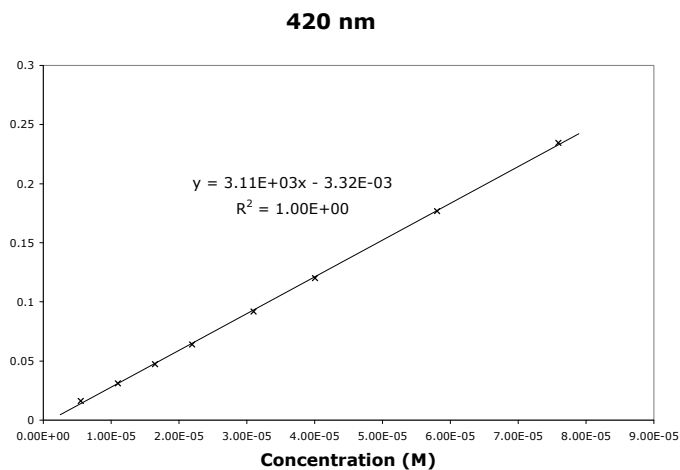UV VIS Spectrum of **S15**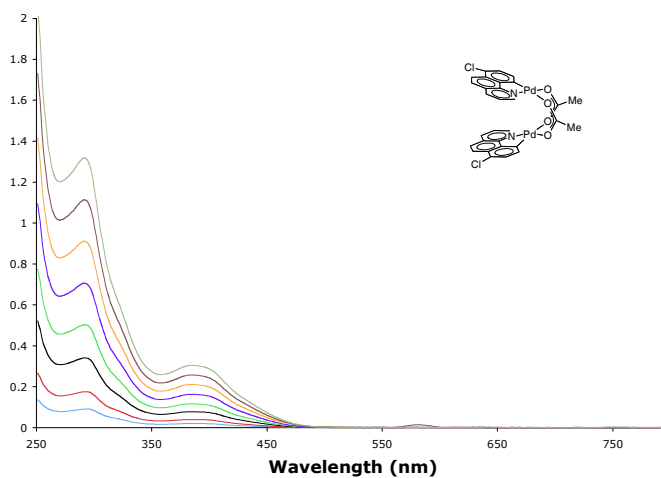

## Molar Absorptivity Determinations

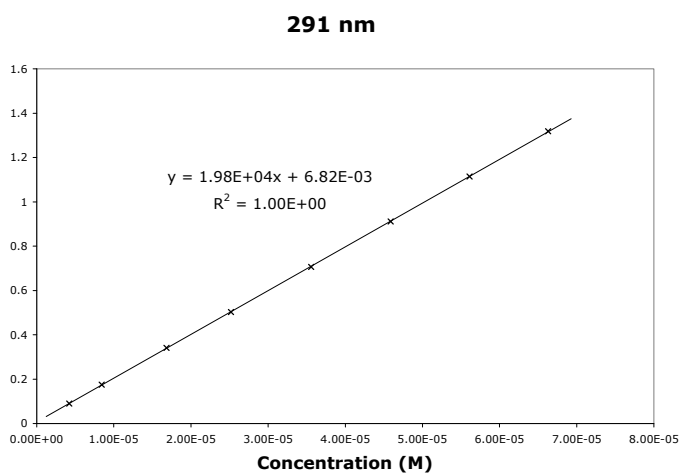

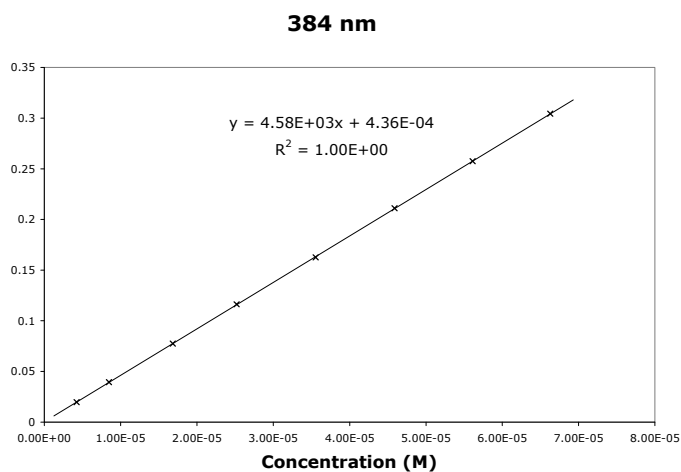

## UV VIS Spectrum of S16

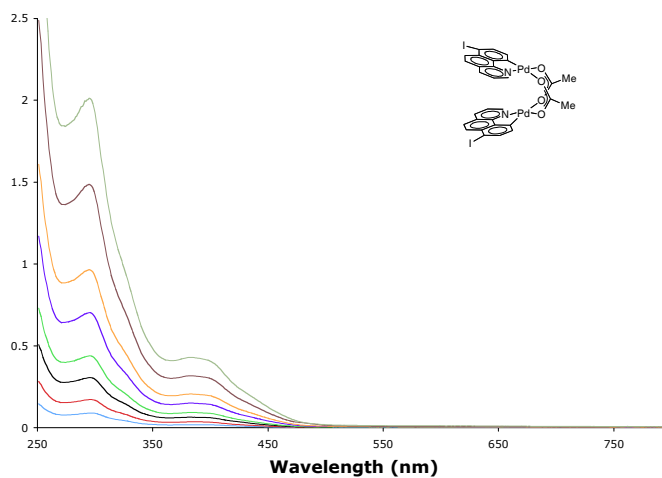

## Molar Absorptivity Determinations

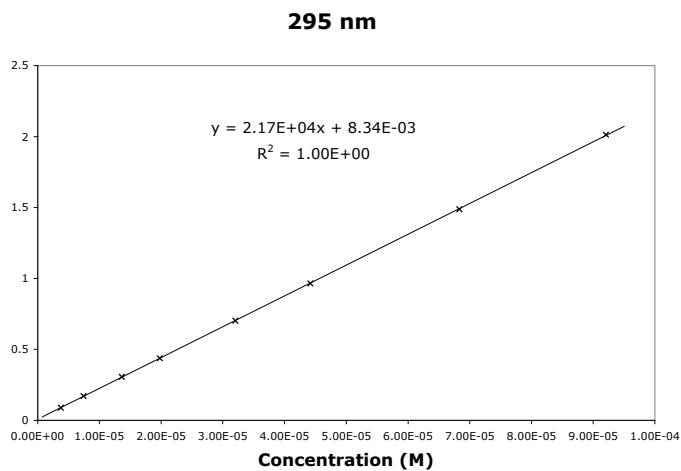



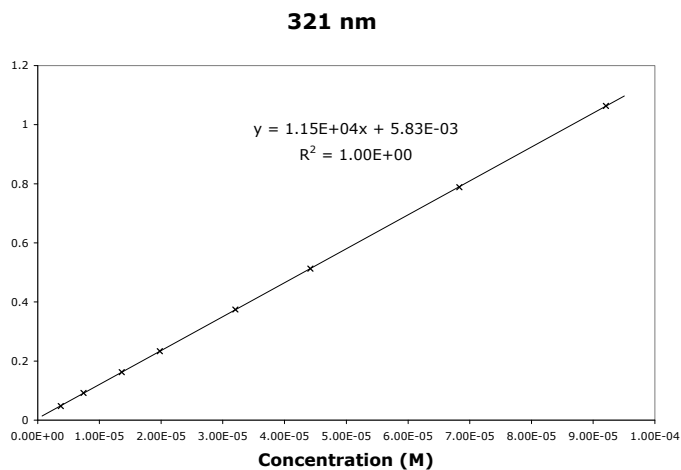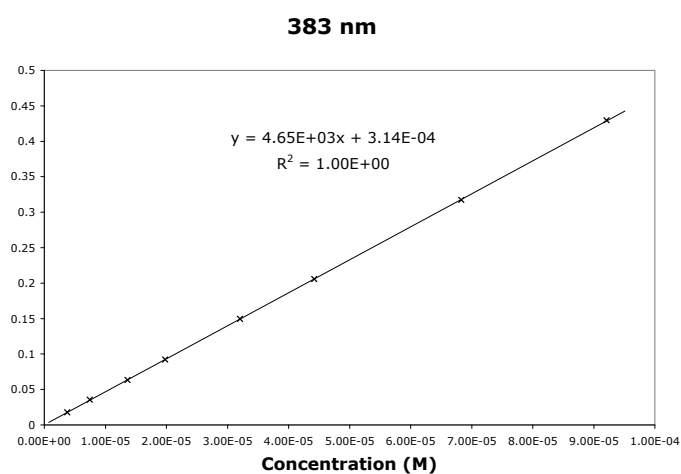UV VIS Spectrum of **S17**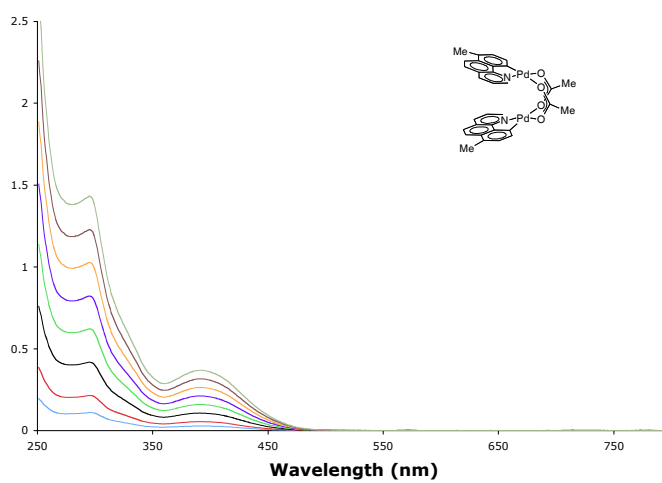

## Molar Absorptivity Determinations

**296 nm**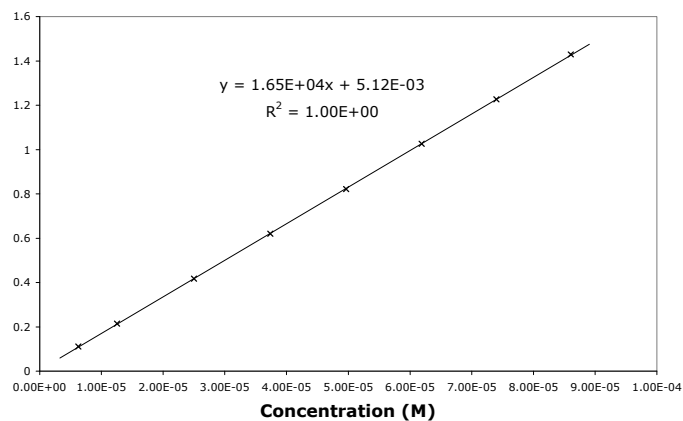**326 nm**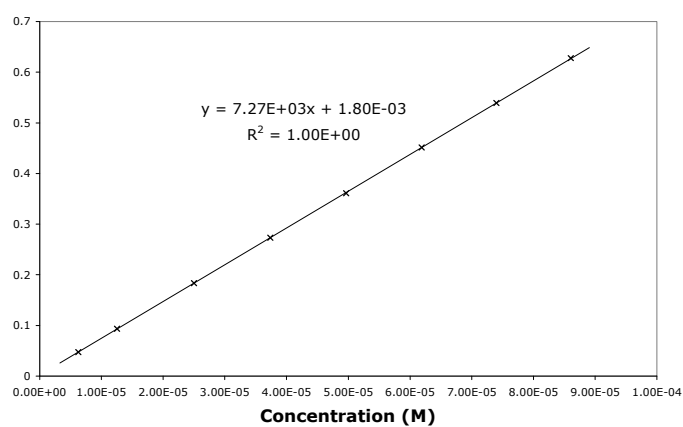**393 nm**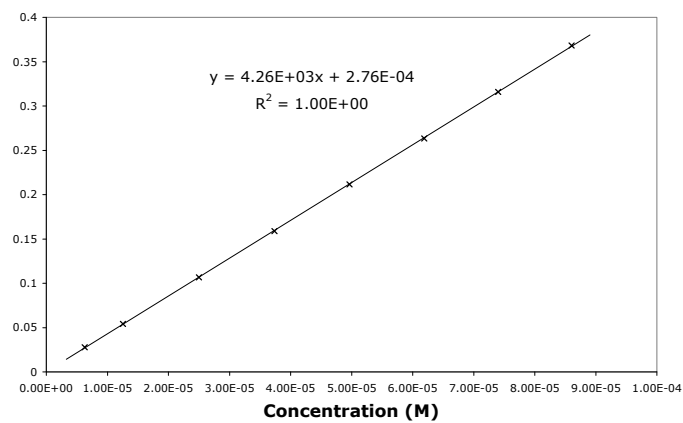UV VIS Spectrum of **1 (18a)**

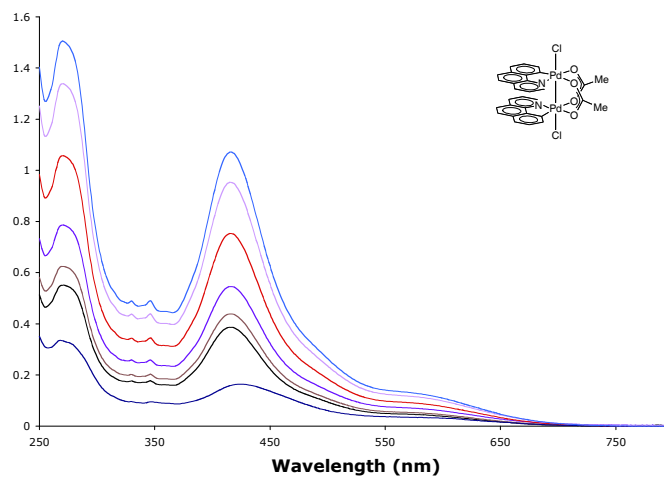

## Molar Absorptivity Determinations

## 272 nm

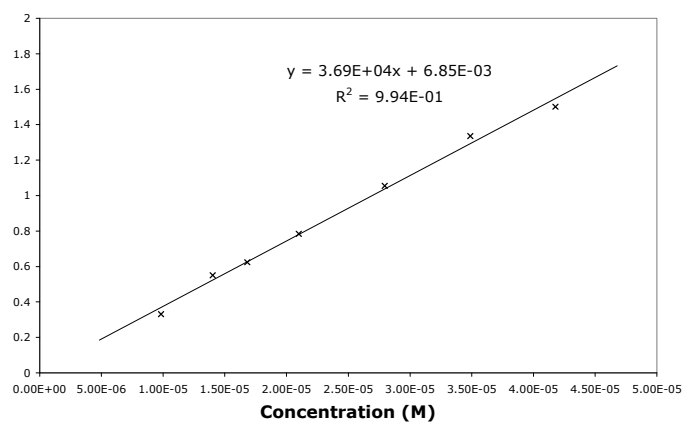

## 418 nm

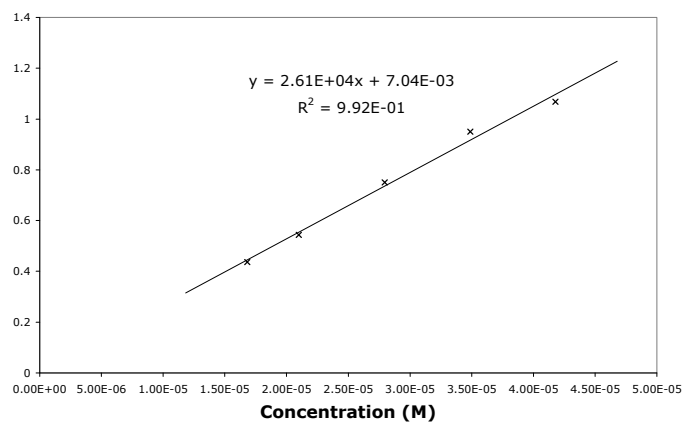

## 575 nm

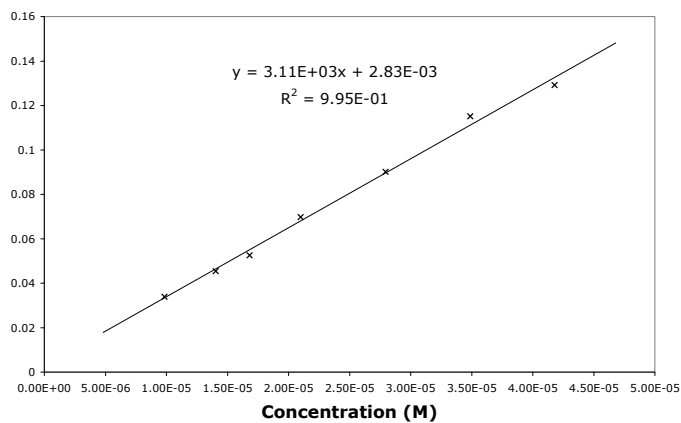UV VIS Spectrum of **18b**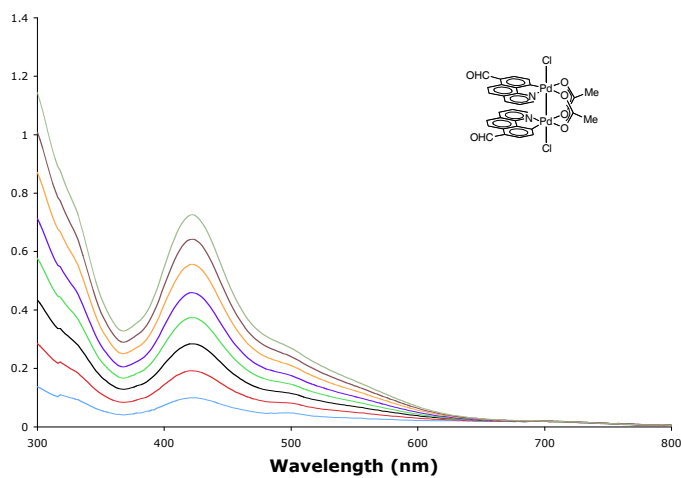

## Molar Absorptivity Determinations

## 420 nm

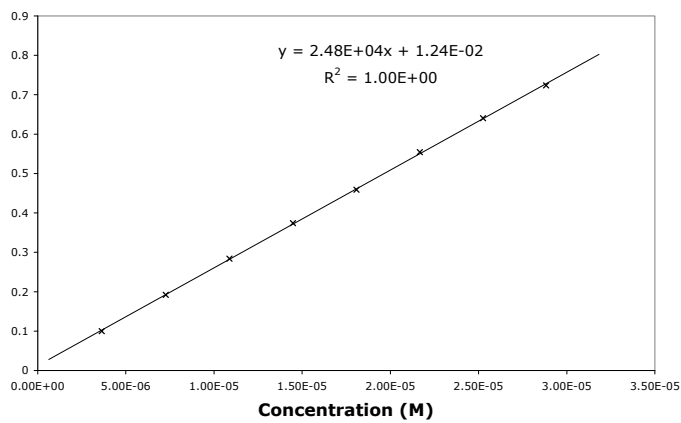

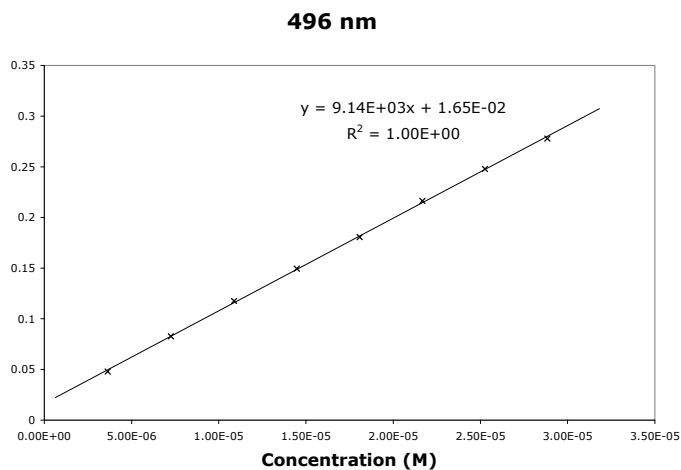UV VIS Spectrum of **18c**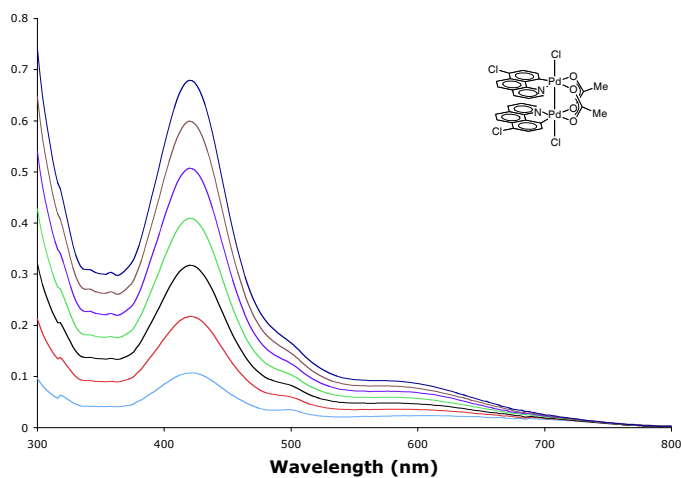

## Molar Absorptivity Determinations

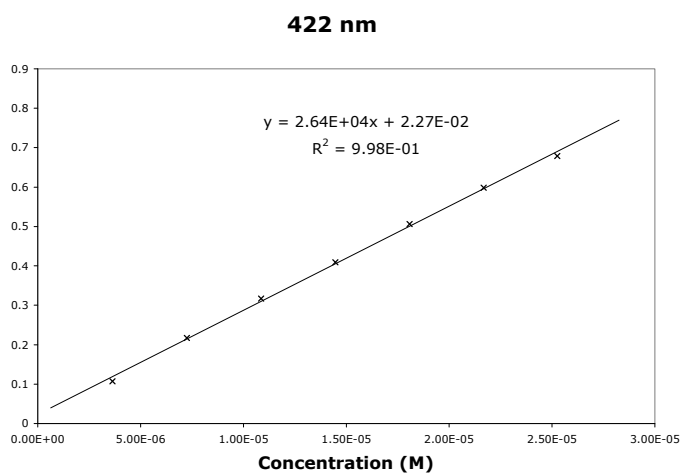

**498 nm**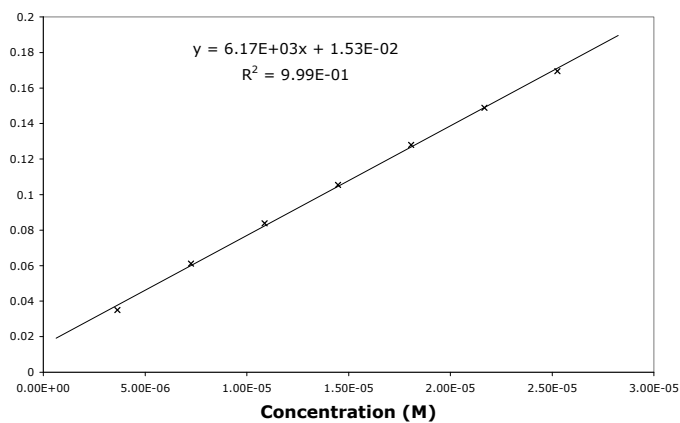**612 nm**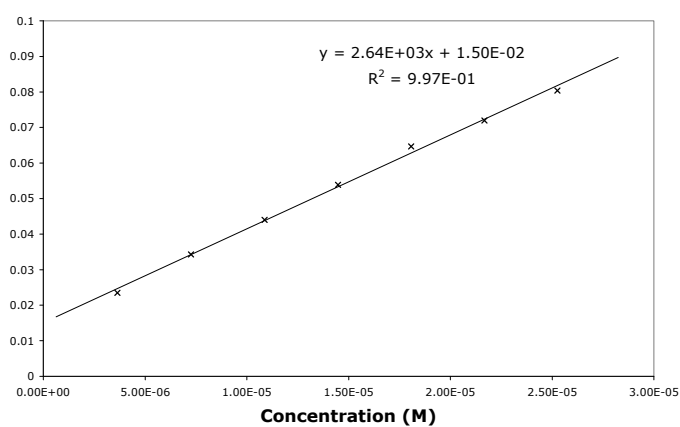UV VIS Spectrum of **18d**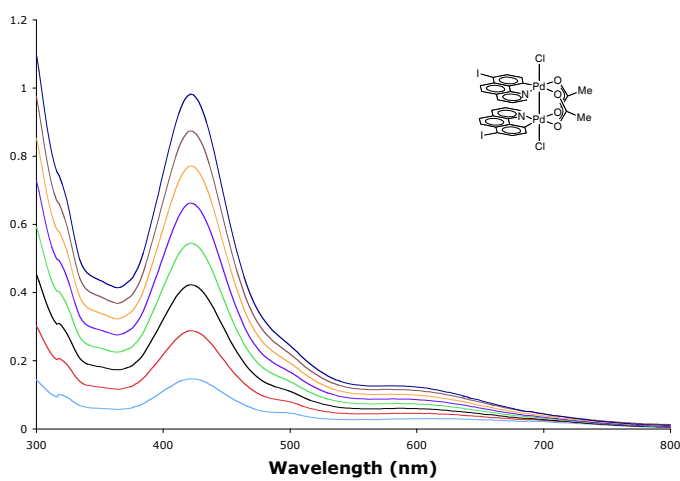

## Molar Absorptivity Determinations

**318 nm**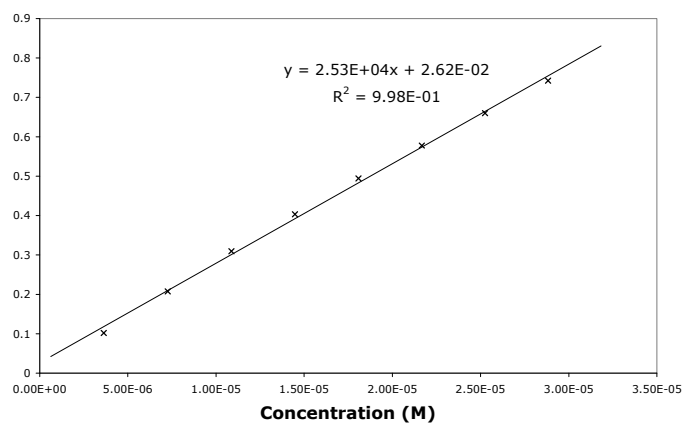**420 nm**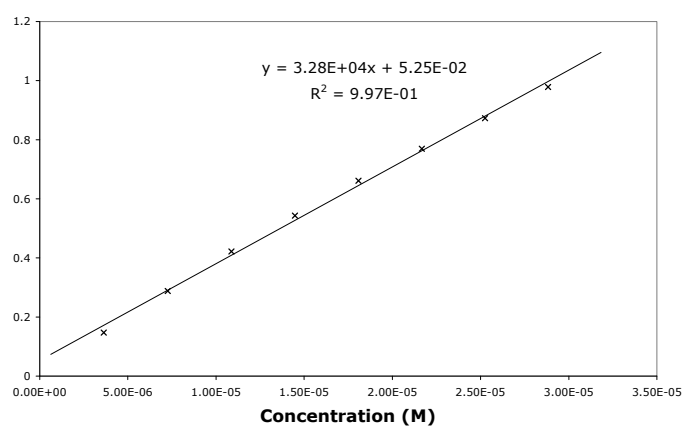**496 nm**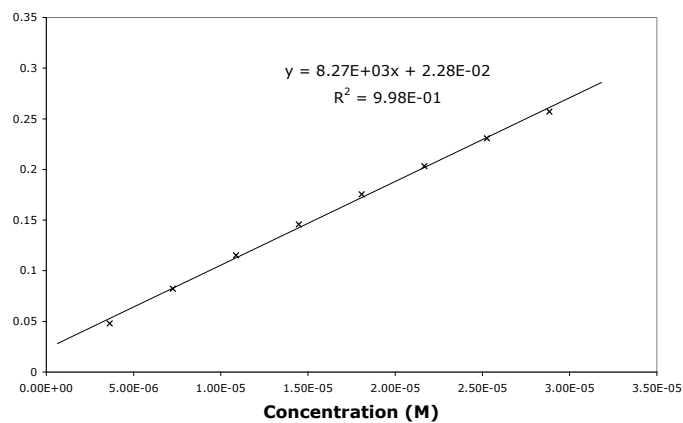

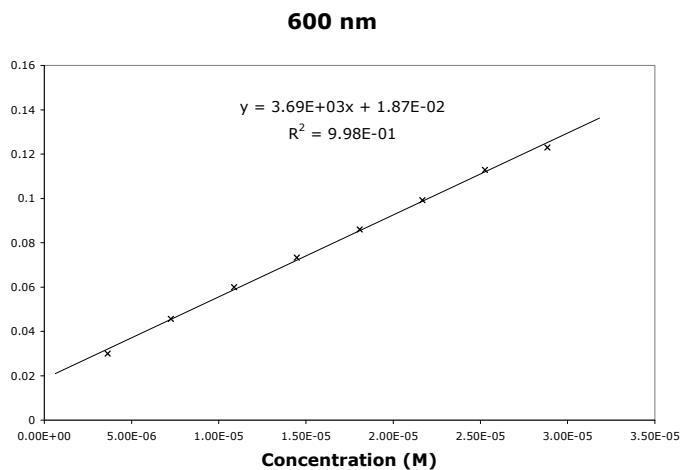UV VIS Spectrum of **18e**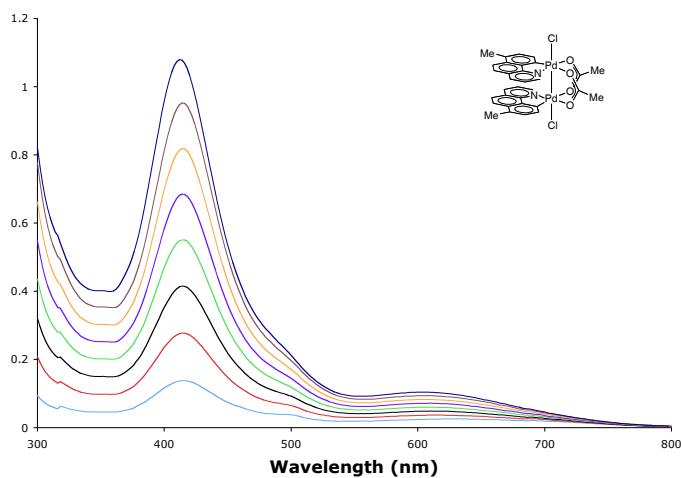

## Molar Absorptivity Determinations

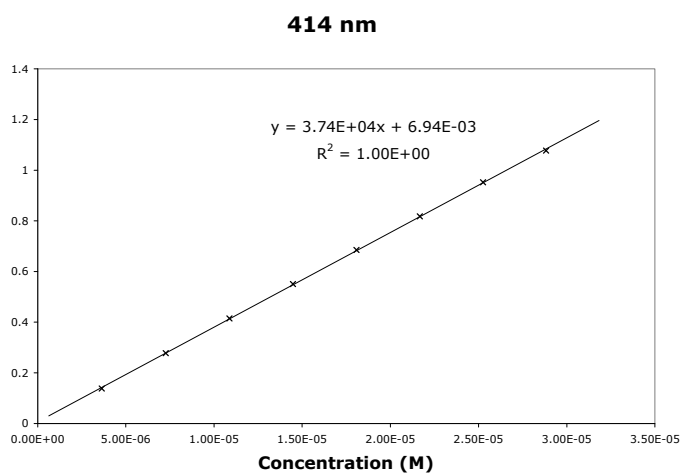



**498 nm**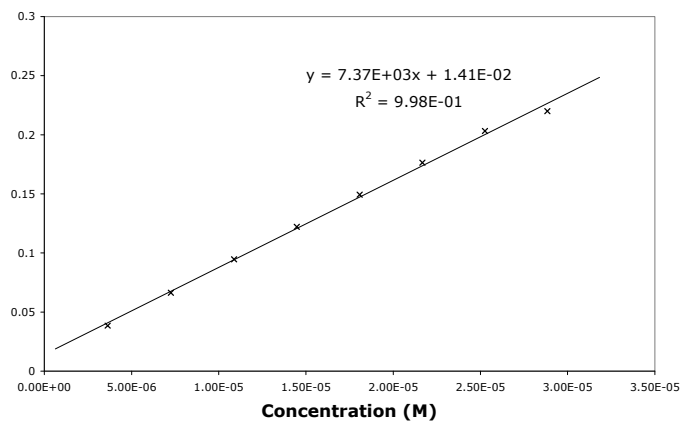**622 nm**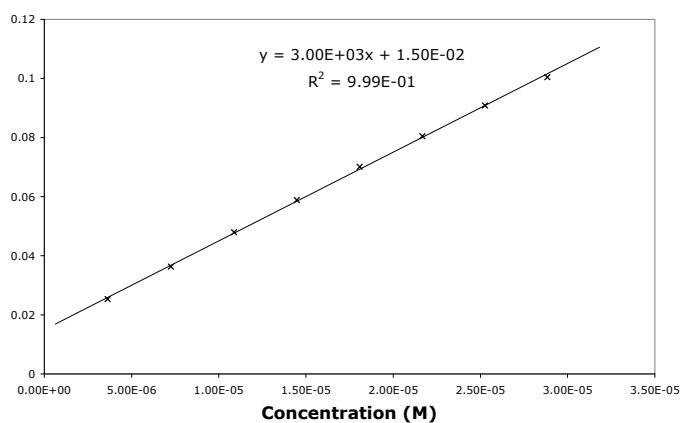UV VIS Spectrum of **S18**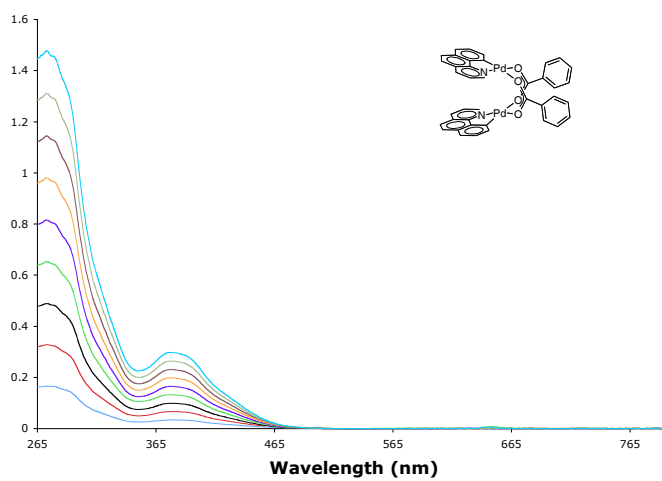

## Molar Absorptivity Determinations

**273 nm**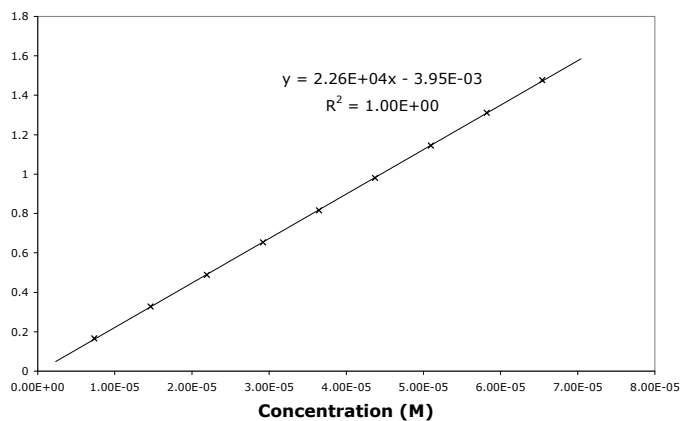**291 nm**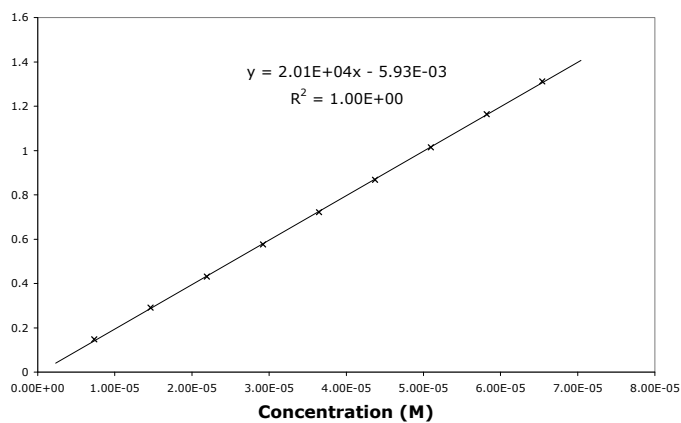**377 nm**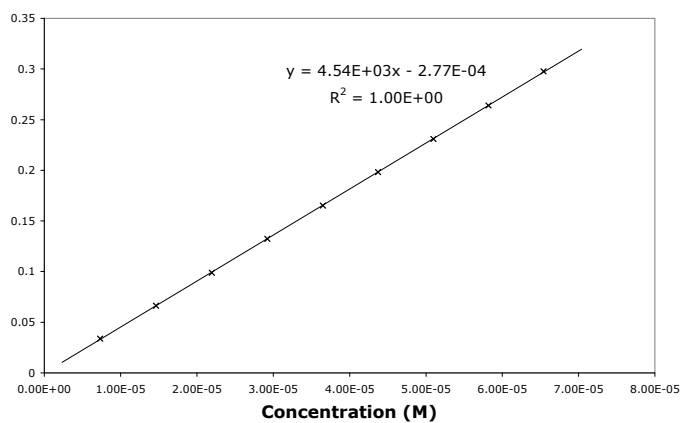

UV VIS Spectrum of S19

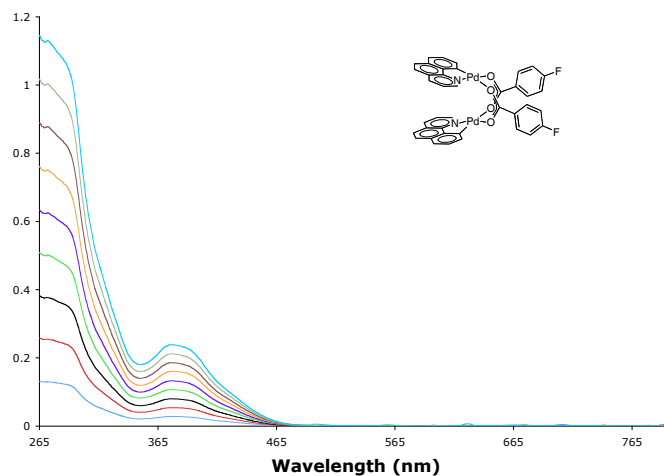

## Molar Absorptivity Determinations

290 nm

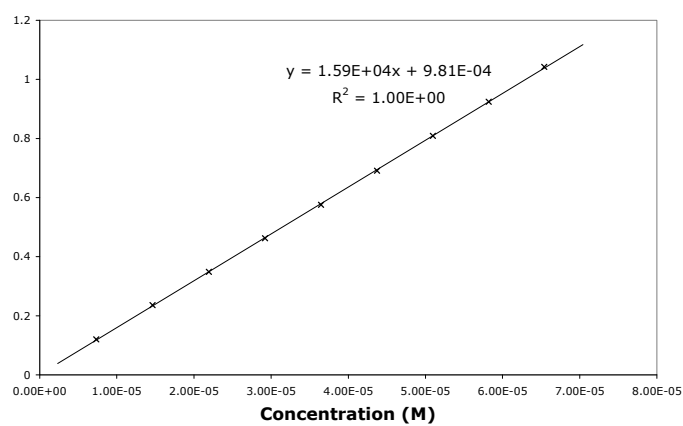

377 nm

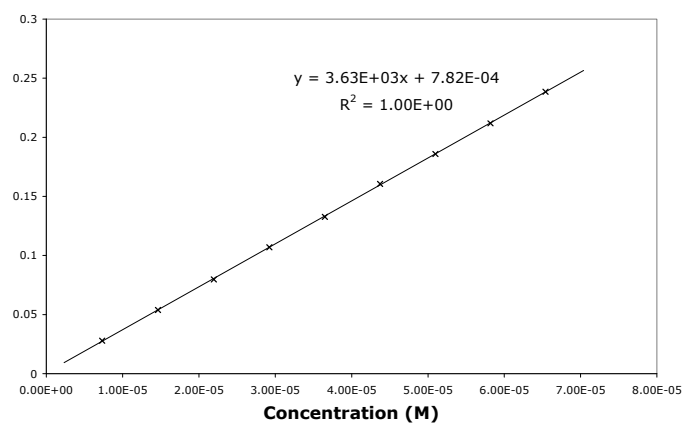

## UV VIS Spectrum of S20

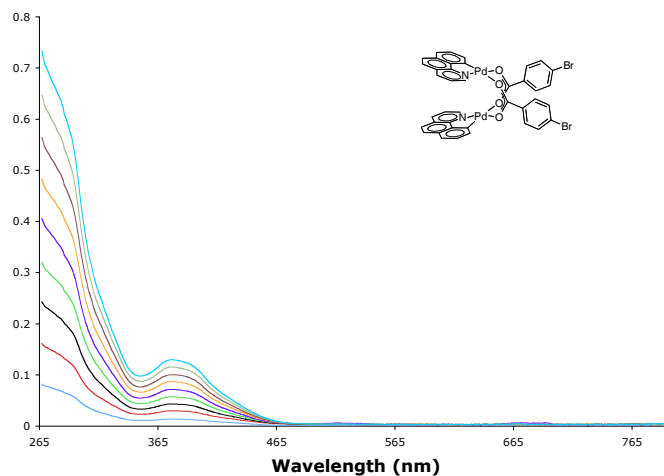

## Molar Absorptivity Determinations

**293 nm**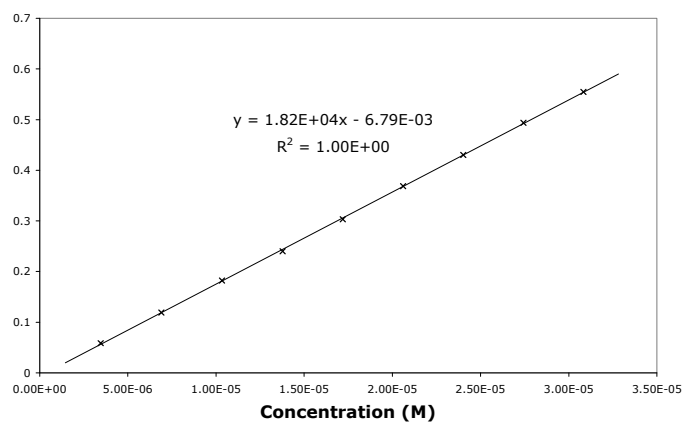**376 nm**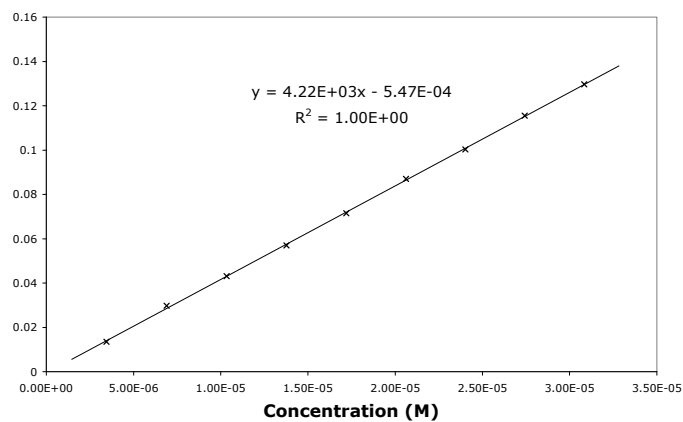

## UV VIS Spectrum of S21

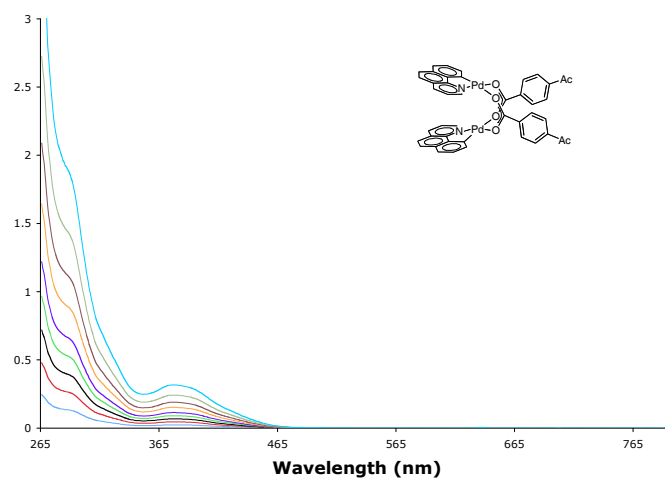

## Molar Absorptivity Determinations

## 290 nm

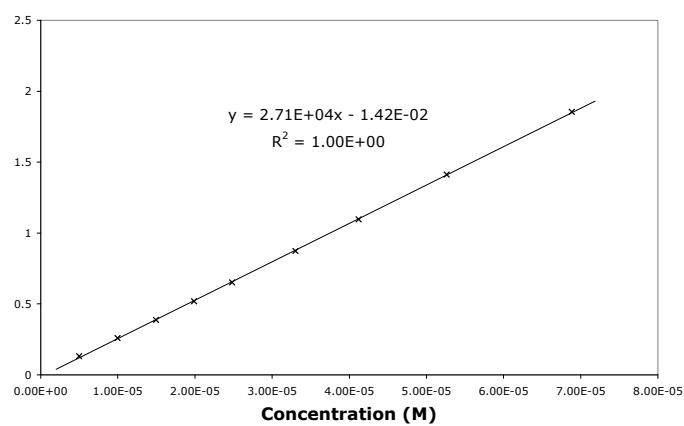

## 377 nm

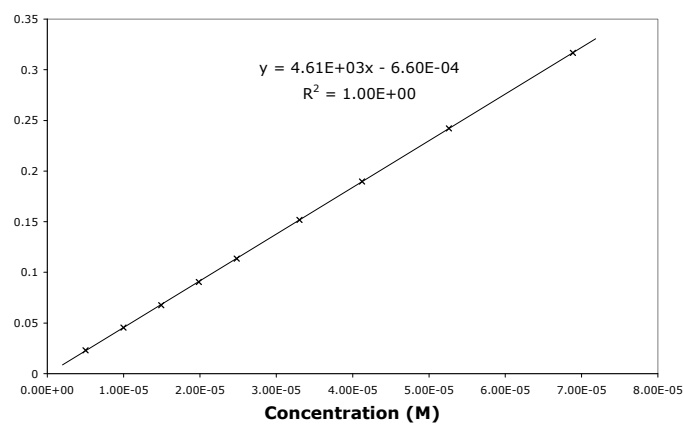

## UV VIS Spectrum of S22

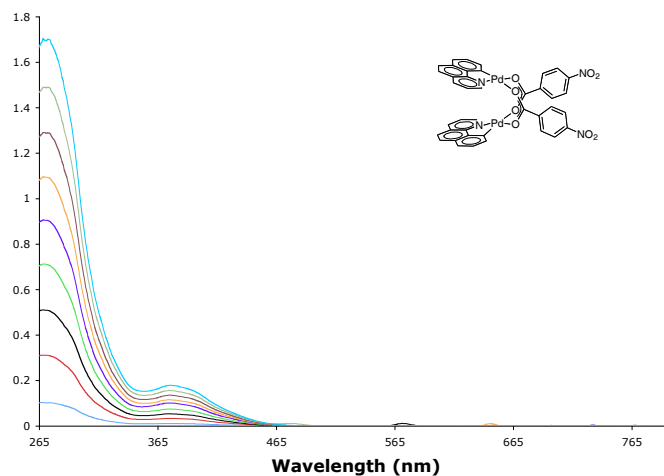

## Molar Absorptivity Determinations

**272 nm**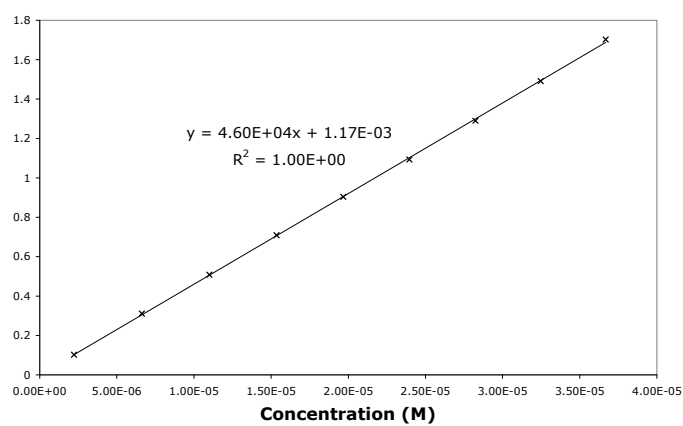**375 nm**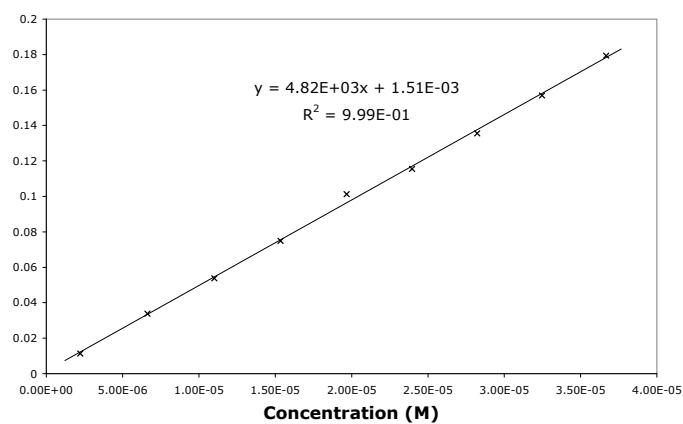UV VIS Spectrum of **20a**

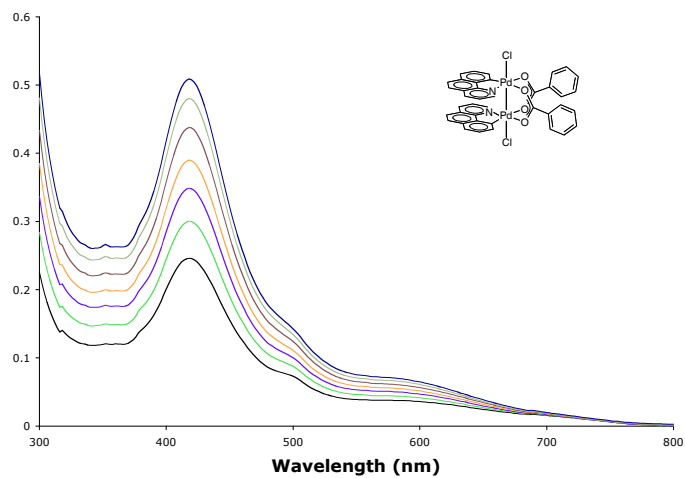

## Molar Absorptivity Determinations

## 418 nm

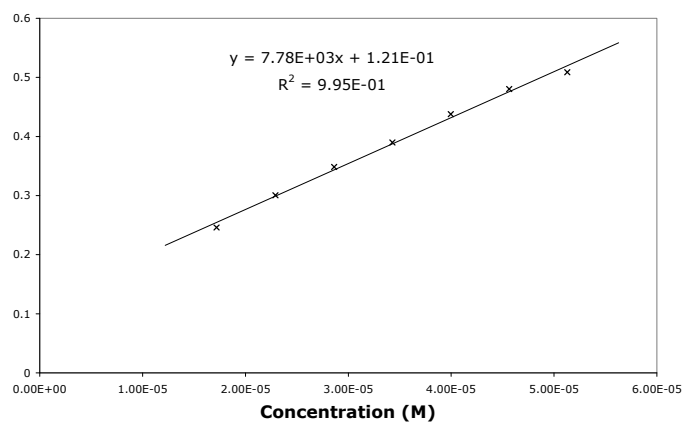

## 496 nm

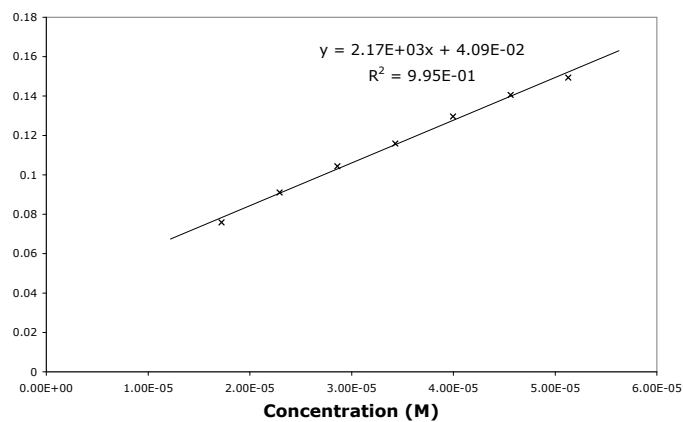

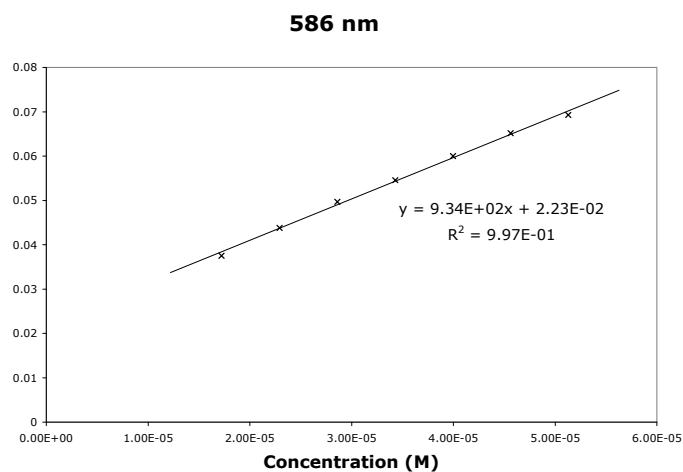UV VIS Spectrum of **20b**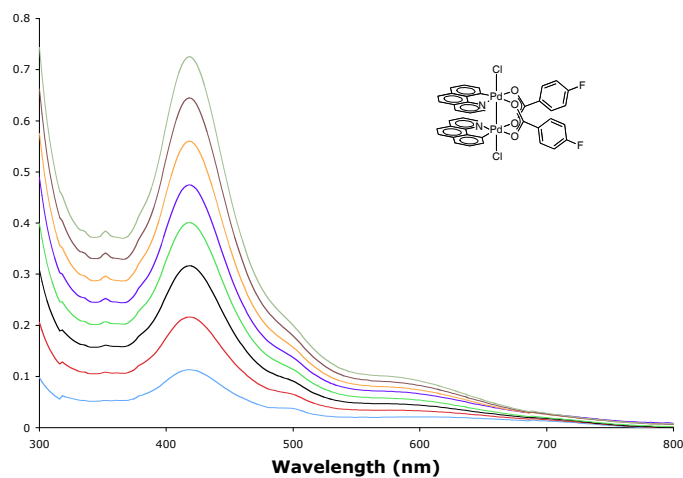

## Molar Absorptivity Determinations

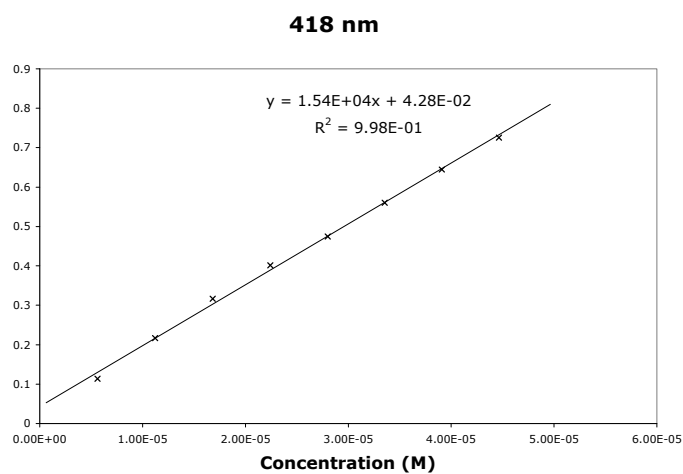



**492 nm**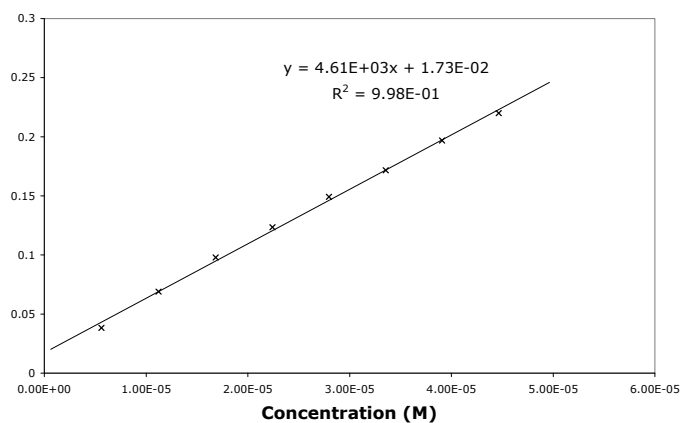**590 nm**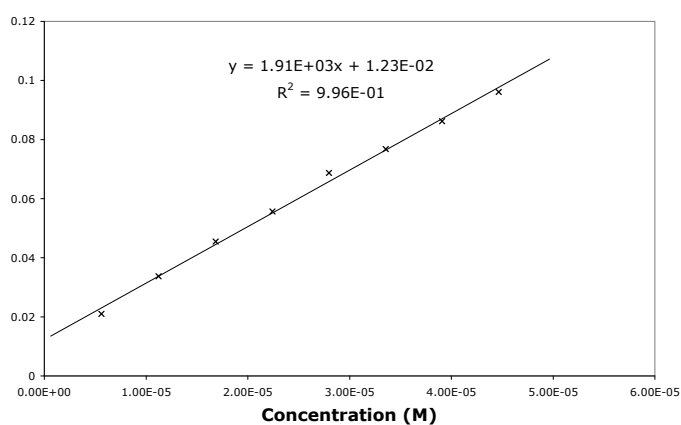UV VIS Spectrum of **20c**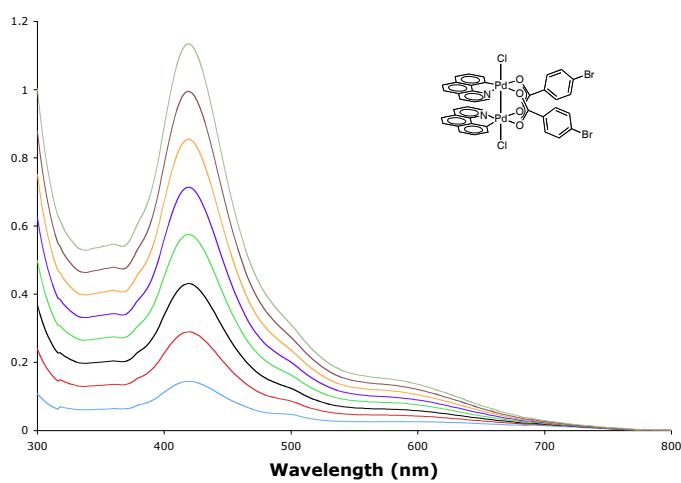

## Molar Absorptivity Determinations

**418 nm**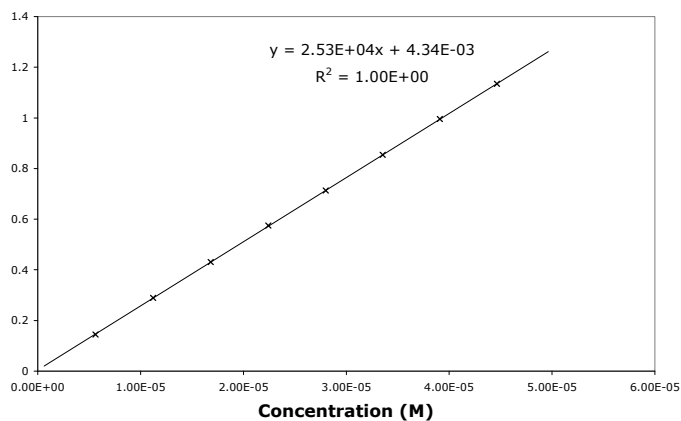**500 nm**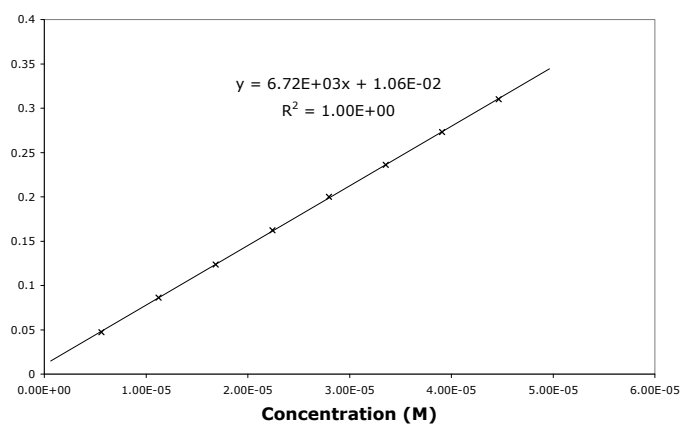**590 nm**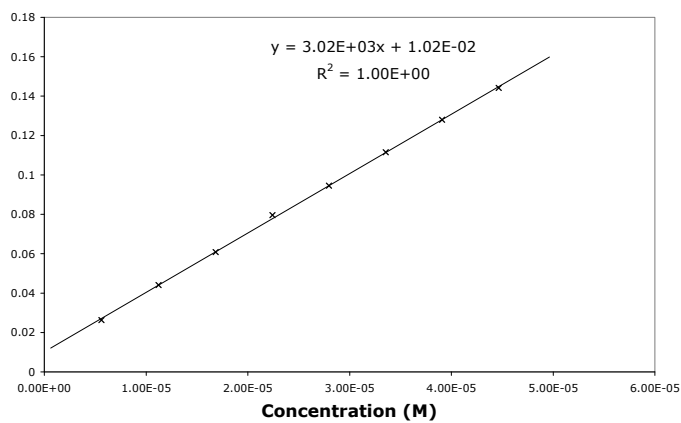UV VIS Spectrum of **20d**

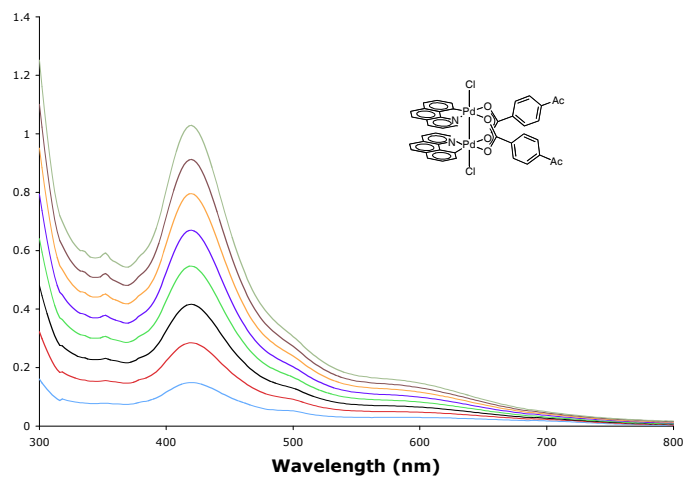

## Molar Absorptivity Determinations

## 420 nm

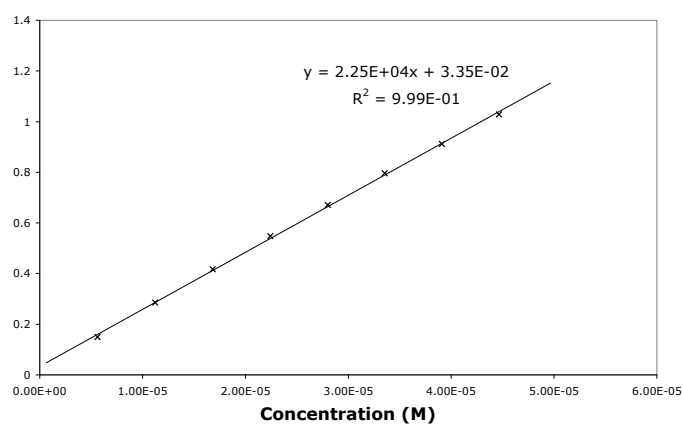

## 494 nm

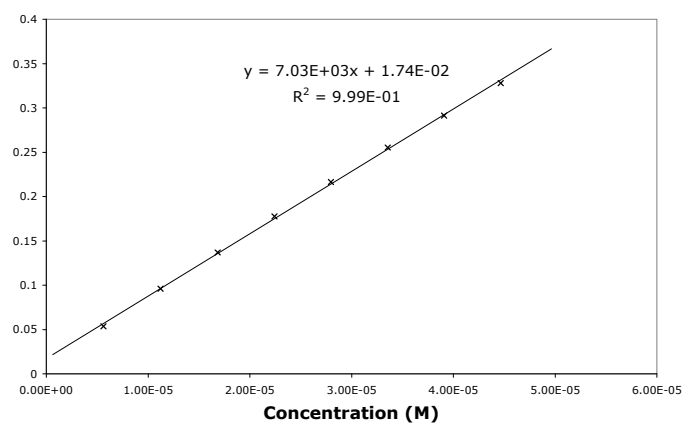

**596 nm**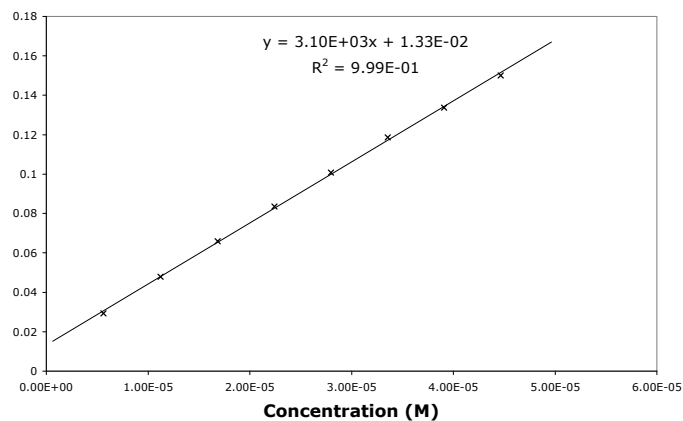UV VIS Spectrum of **20e**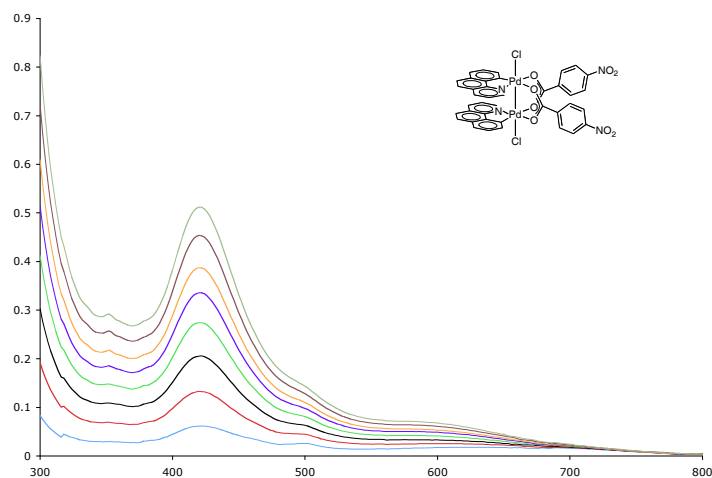

## Molar Absorptivity Determinations

**422 nm**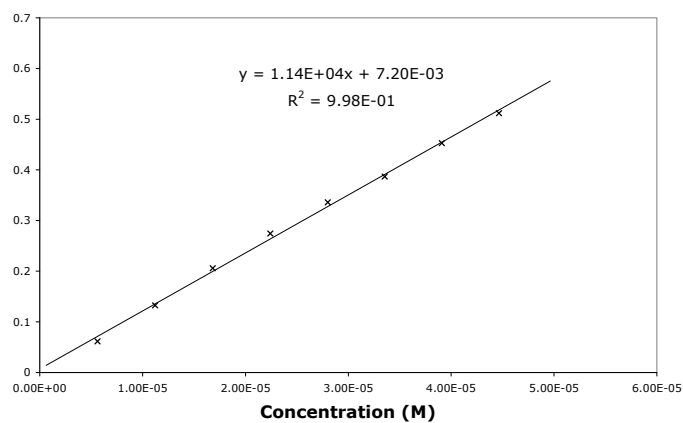

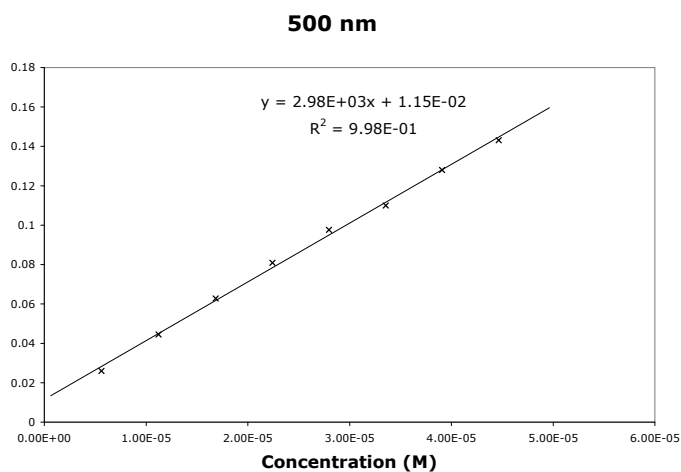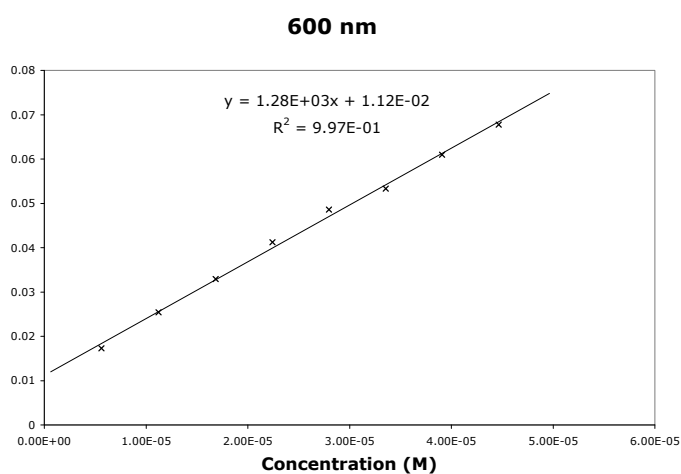UV VIS Spectrum of **21**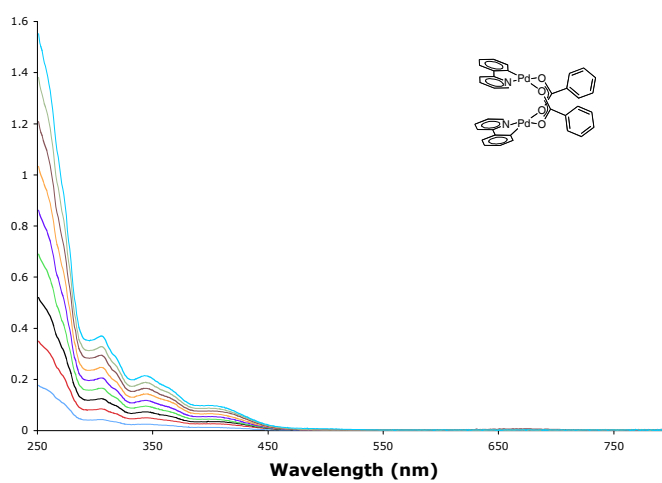

## Molar Absorptivity Determinations

**306 nm**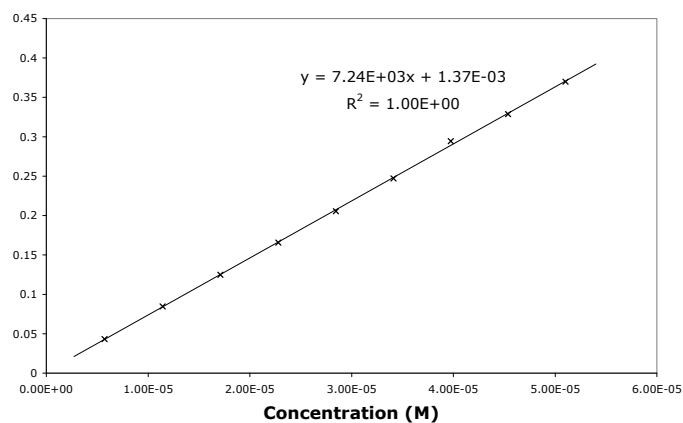**317 nm**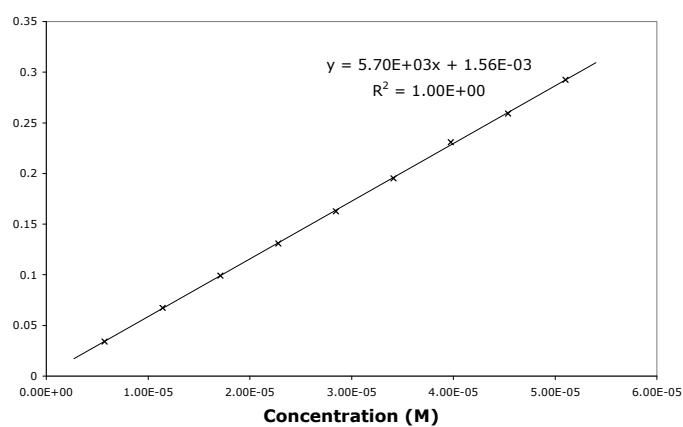**343 nm**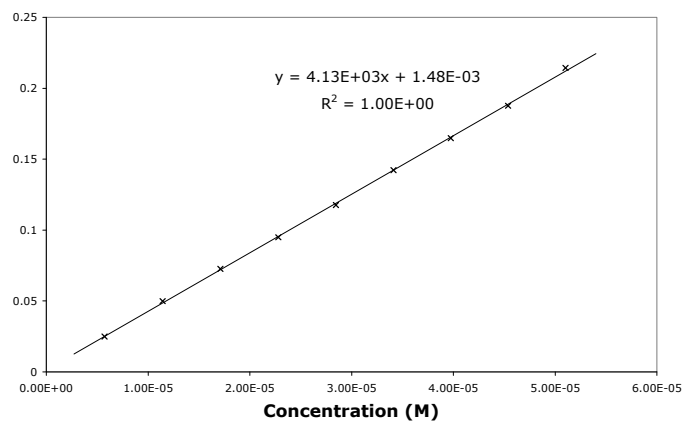

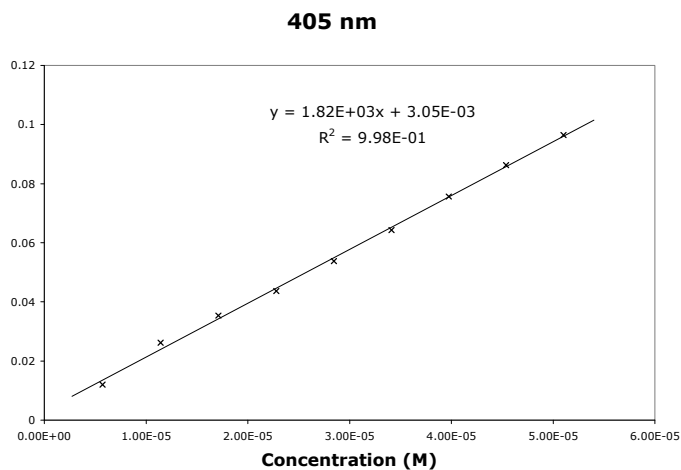UV VIS Spectrum of **22**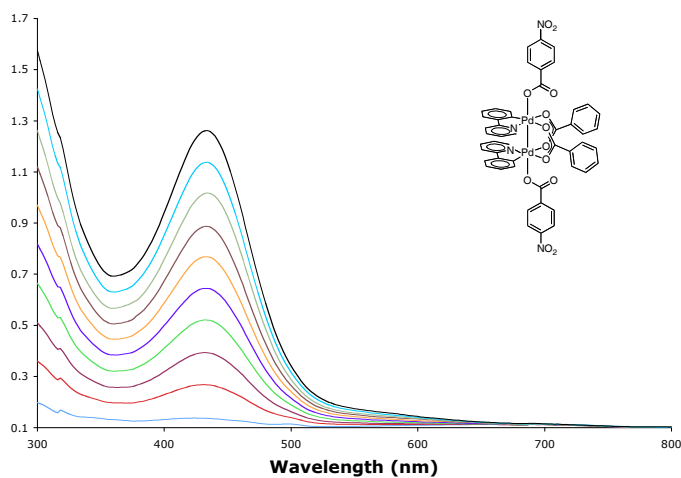

## Molar Absorptivity Determinations

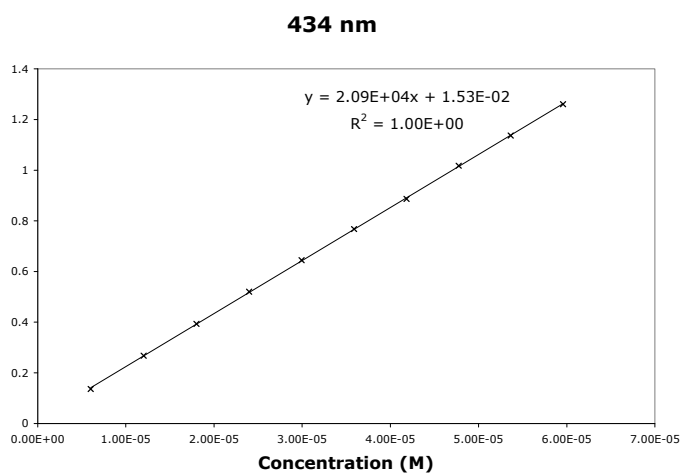

UV VIS Spectrum of **23**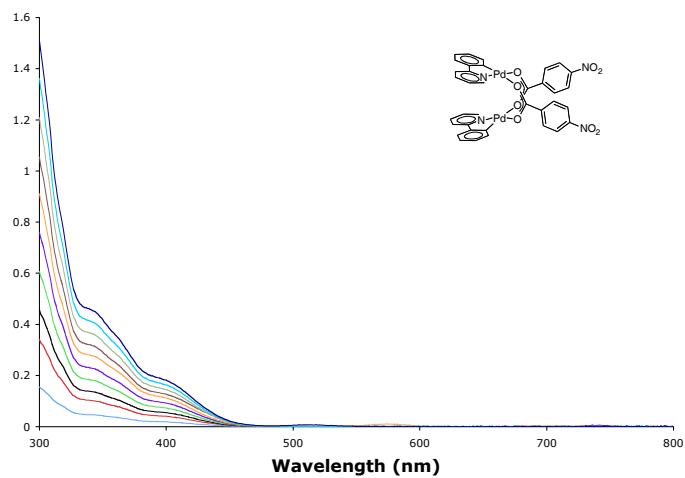

## Molar Absorptivity Determinations

**317 nm**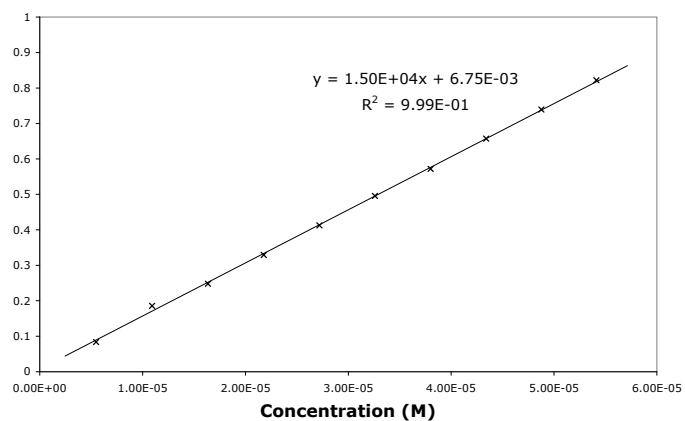**341 nm**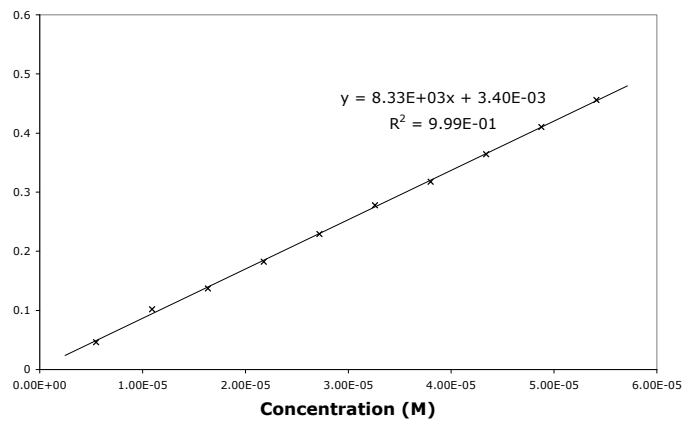



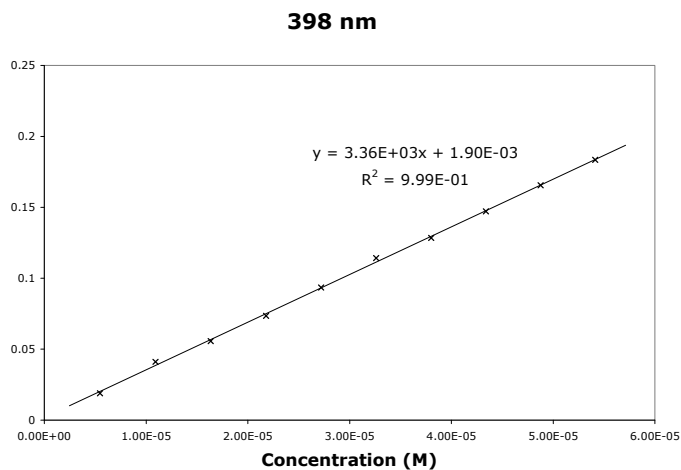UV VIS Spectrum of **34**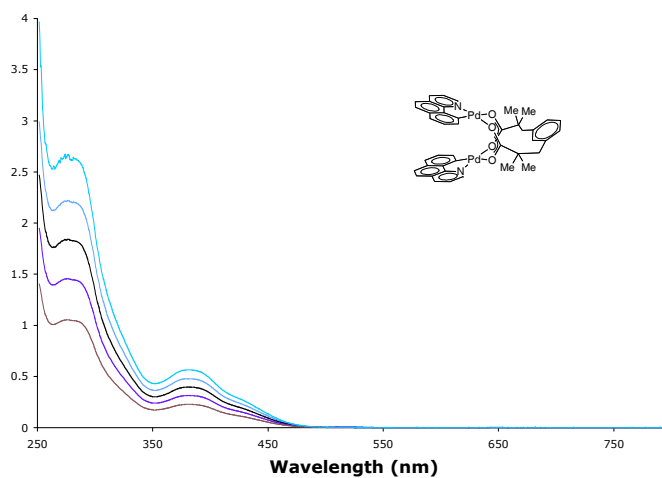

## Molar Absorptivity Determinations

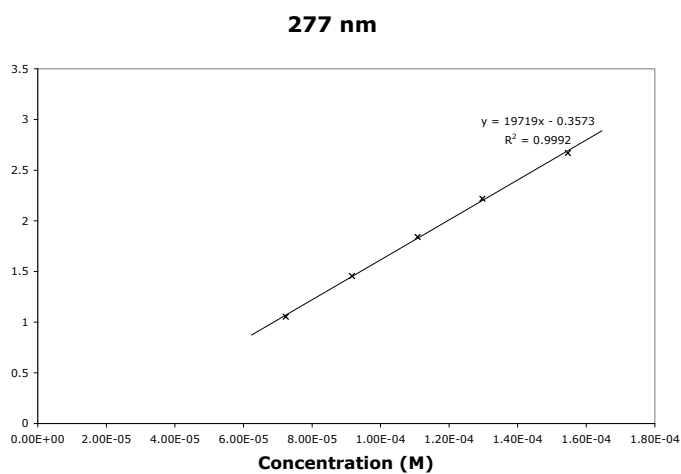

**380 nm**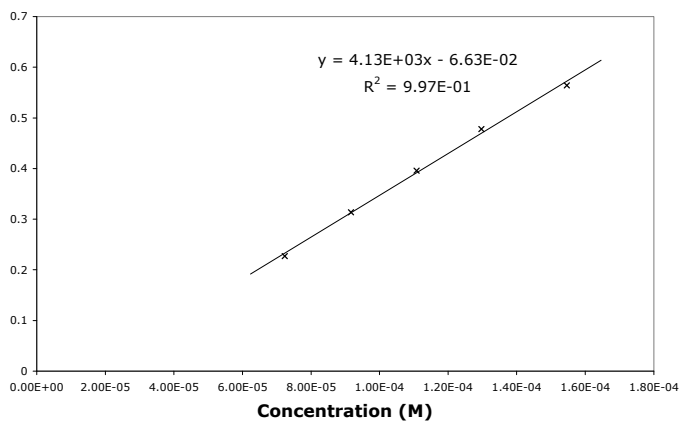**424 nm**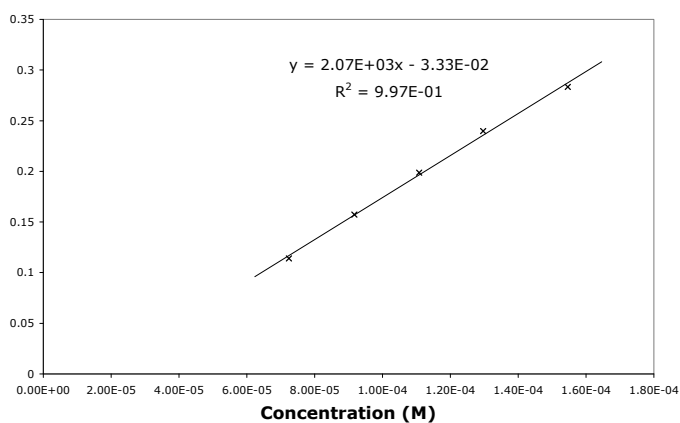UV VIS Spectrum of **35**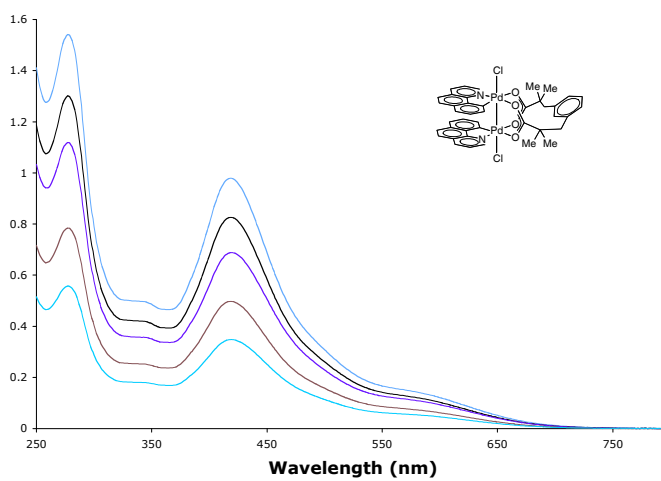

## Molar Absorptivity Determinations

**277 nm**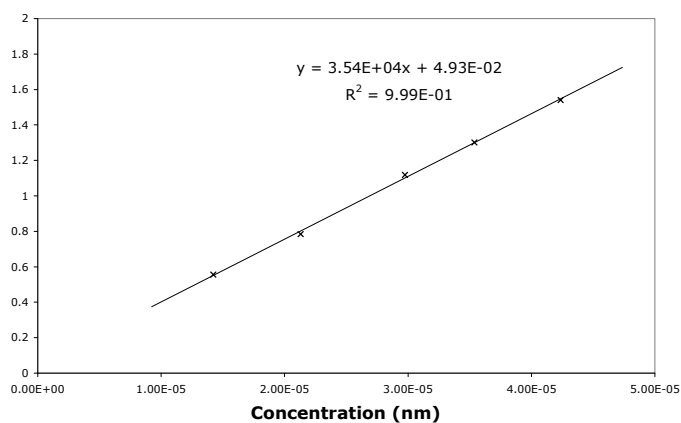**418 nm**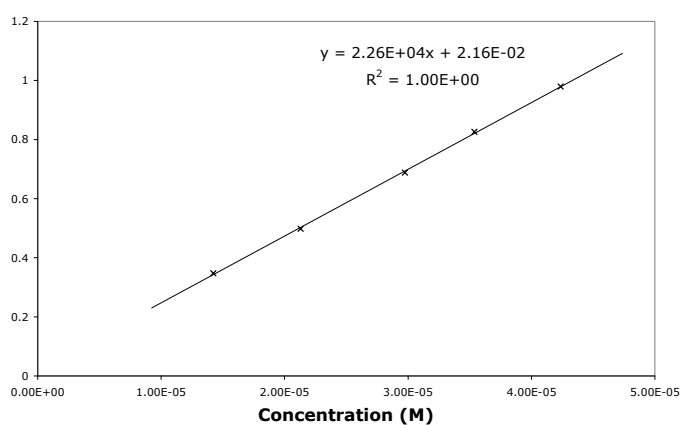**570 nm**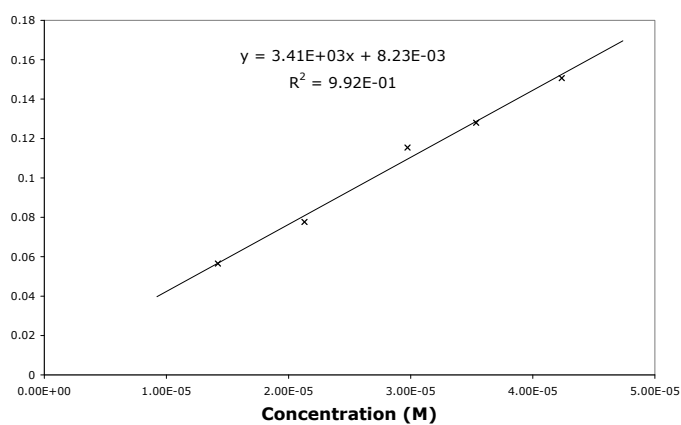

## Appendix C: Electrochemical Data

### Benzo[*h*]quinoliny Palladium Acetate Dimer (9)

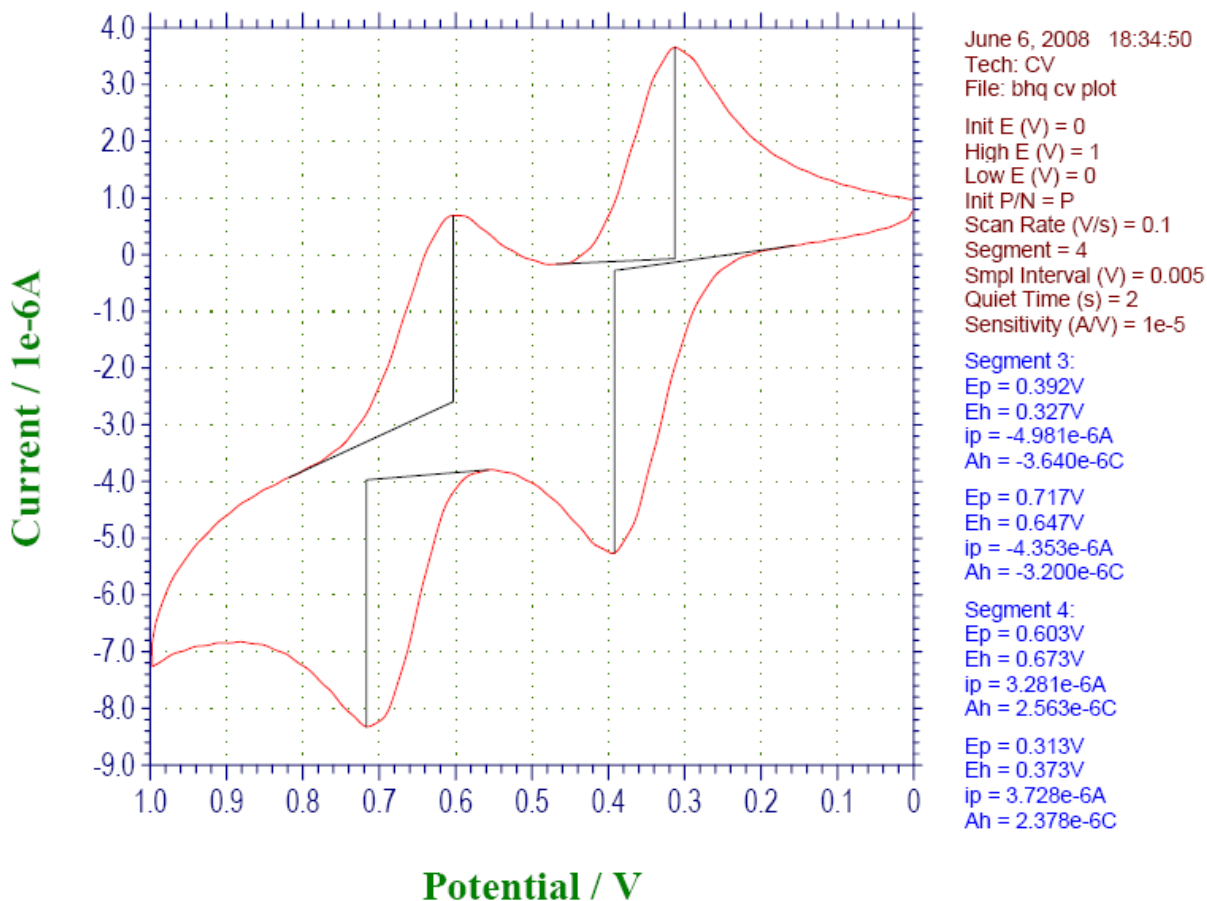

The CV of **9** was obtained from a 1 mM solution of **9** in THF with a glassy carbon working electrode. NBu<sub>4</sub>PF<sub>6</sub> (3.0 M) was used as the electrolyte. The CV was obtained at a scan rate of 0.1 V/s against Ag/AgCl and was confirmed versus added ferrocene.

The oxidation wave at 420 mV (vs Fc/Fc<sup>+</sup>) is due to the Pd(II)–Pd(II) to Pd(II)–Pd(III) redox couple while the oxidation wave at 720 mV (vs. Fc/Fc<sup>+</sup>) is due to the Pd(II)–Pd(III) to Pd(III)–Pd(III) redox couple.

## Appendix D: X-ray Crystallographic Analysis

### Benzo[*h*]quinolinyl Palladium Acetate Dimer (**9**) (CCDC 705005)

The compound was crystallized from a dichloromethane / pentane solution as yellow needles. A crystal 0.250 mm x 0.100 mm x 0.075 mm in size was selected, mounted on a nylon loop with Paratone-N oil, and transferred to a Bruker SMART APEX diffractometer equipped with an Oxford Cryosystems 600 Series Cryostream Cooler and Mo K $\alpha$  radiation ( $\lambda = 0.71073 \text{ \AA}$ ). A total of 3840 frames were collected at 193 (2) K to  $\theta_{\max} = 27.5^\circ$  with an oscillation range of  $0.3^\circ/\text{frame}$ , and an exposure time of 10 s/frame using SMART software. (Bruker AXS, 2001a) Unit cell refinement on all observed reflections, and data reduction with corrections for Lp and decay were performed using SAINT. (Bruker AXS, 2006) Scaling and a multi-scan absorption correction were done using SADABS. (Bruker AXS, 2004) The minimum and maximum transmission factors were 0.7132 and 0.8990, respectively. A total of 51012 reflections were collected, 3144 were unique ( $R_{\text{int}} = 0.0453$ ), and 3033 had  $I > 2\sigma(I)$ . Systematic absences were consistent with the compound having crystallized in the orthorhombic space group Pmn2<sub>1</sub> or Pmmn. The observed mean  $|E^2 - 1|$  value was 0.786 (versus the expectation values of 0.968 and 0.736 for centric and noncentric data, respectively). The  $E^2$  statistics and figures of merit were ascertained to be unreliable due to the presence of two palladium atoms in the asymmetric unit and the presence of twinning. The centrosymmetric space group Pmmn (No. 59) was selected, and confirmed to be the correct choice by successful refinement of the structure.

The structure was solved by direct methods and refined by full-matrix least-squares on  $F^2$  using SHELXTL. (Bruker AXS, 2001b) The asymmetric unit was found to contain two quarter-molecules of (Acetato) (10-benzo[*h*]quinolinato)palladium(II) dimer, i.e., there are four dimers in the unit cell, each with crystallographic  $mm2$  symmetry, and located at Wyckoff positions  $2a$  and  $2b$ . Since the ligating atoms of the 10-benzo[*h*]quinolinato ligands are required by symmetry to be compositionally disordered, the N(1) and C(1) atoms were assigned site occupancy factors of 0.5 and their coordinates were refined to the same values. The N(1') and C(1') atoms were treated similarly. All of the nonhydrogen atoms were refined with anisotropic displacement coefficients. The hydrogen atoms were assigned isotropic displacement coefficients  $U(\text{H}) = 1.2U(\text{C})$  or  $1.5U(\text{C}_{\text{methyl}})$ , and their coordinates were allowed to ride on their respective carbons. This model refined to  $R(F) = 0.2773$ , at which point it was obvious that the data were twinned. A Platon/TwinRotMat test indicated 50:50 twinning about  $[1-10]$ . (Spek, 2003) Inclusion of the twin law (0-10, -100, 00-1) in all subsequent cycles of least-squares led to a dramatic lowering of  $R(F)$  from 0.28 to under 0.03. The refinement converged to  $R(F) = 0.0282$ ,  $wR(F^2) = 0.0701$ , and  $S = 1.120$  for 3033 reflections with  $I > 2\sigma(I)$ , and  $R(F) = 0.0297$ ,  $wR(F^2) = 0.0713$ , and  $S = 1.120$  for 3144 unique reflections and 183 parameters. The maximum  $|\Delta/\sigma|$  in the final cycle of least-squares was 0.001, and the residual peaks on the final difference-Fourier map ranged from -0.487 to 1.091 e $\text{\AA}^{-3}$ . Scattering factors were taken from the International Tables for Crystallography, Volume C. (Maslen *et al.*, 1992, and Creagh & McAuley, 1992)

Table 1. Crystal data and structure refinement for **9**.

|                      |                                                                               |                       |
|----------------------|-------------------------------------------------------------------------------|-----------------------|
| Identification code  | <b>9</b> (CCDC 705005)                                                        |                       |
| Empirical formula    | C <sub>30</sub> H <sub>22</sub> N <sub>2</sub> O <sub>4</sub> Pd <sub>2</sub> |                       |
| Formula weight       | 687.30                                                                        |                       |
| Temperature          | 193(2) K                                                                      |                       |
| Wavelength           | 0.71073 $\text{\AA}$                                                          |                       |
| Crystal system       | Orthorhombic                                                                  |                       |
| Space group          | Pmmn                                                                          |                       |
| Unit cell dimensions | a = 16.039(2) $\text{\AA}$                                                    | $\alpha = 90^\circ$ . |
|                      | b = 16.038(2) $\text{\AA}$                                                    | $\beta = 90^\circ$ .  |

|                                       |                                                              |                       |
|---------------------------------------|--------------------------------------------------------------|-----------------------|
|                                       | $c = 9.9156(13) \text{ \AA}$                                 | $\gamma = 90^\circ$ . |
| Volume                                | $2550.6(6) \text{ \AA}^3$                                    |                       |
| Z                                     | 4                                                            |                       |
| Density (calculated)                  | $1.790 \text{ Mg/m}^3$                                       |                       |
| Absorption coefficient                | $1.450 \text{ mm}^{-1}$                                      |                       |
| F(000)                                | 1360                                                         |                       |
| Crystal size                          | $0.25 \times 0.10 \times 0.08 \text{ mm}^3$                  |                       |
| Theta range for data collection       | $1.27 \text{ to } 27.50^\circ$                               |                       |
| Index ranges                          | $-20 \leq h \leq 20, -20 \leq k \leq 20, -12 \leq l \leq 12$ |                       |
| Reflections collected                 | 51012                                                        |                       |
| Independent reflections               | 3144 [R(int) = 0.0453]                                       |                       |
| Completeness to theta = $27.50^\circ$ | 100.0 %                                                      |                       |
| Max. and min. transmission            | 0.8990 and 0.7132                                            |                       |
| Refinement method                     | Full-matrix least-squares on F <sup>2</sup>                  |                       |
| Data / restraints / parameters        | 3144 / 0 / 183                                               |                       |
| Goodness-of-fit on F <sup>2</sup>     | 1.120                                                        |                       |
| Final R indices [I > 2sigma(I)]       | R1 = 0.0282, wR2 = 0.0701                                    |                       |
| R indices (all data)                  | R1 = 0.0297, wR2 = 0.0713                                    |                       |
| Largest diff. peak and hole           | $1.091 \text{ and } -0.487 \text{ e.\AA}^{-3}$               |                       |

Table 2. Bond lengths [ $\text{\AA}$ ] and angles [ $^\circ$ ] for **9**.

|                 |           |                      |            |
|-----------------|-----------|----------------------|------------|
| Pd(1)-N(1)      | 2.000(3)  | N(1')-C(6')          | 1.380(5)   |
| Pd(1)-C(1)#1    | 2.000(3)  | C(2')-C(3')          | 1.407(6)   |
| Pd(1)-N(1)#1    | 2.000(3)  | C(2')-H(2')          | 0.9500     |
| Pd(1)-O(1)#1    | 2.090(2)  | C(3')-C(4')          | 1.367(6)   |
| Pd(1)-O(1)      | 2.090(2)  | C(3')-H(3')          | 0.9500     |
| Pd(1)-Pd(1)#2   | 2.8419(8) | C(4')-C(5')          | 1.406(6)   |
| O(1)-C(8)       | 1.249(3)  | C(4')-H(4')          | 0.9500     |
| N(1)-C(2)       | 1.367(5)  | C(5')-C(6')          | 1.408(5)   |
| N(1)-C(6)       | 1.394(5)  | C(5')-C(7')          | 1.429(5)   |
| C(2)-C(3)       | 1.396(6)  | C(6')-C(6')#4        | 1.432(6)   |
| C(2)-H(2)       | 0.9500    | C(7')-C(7')#4        | 1.377(8)   |
| C(3)-C(4)       | 1.368(6)  | C(7')-H(7')          | 0.9500     |
| C(3)-H(3)       | 0.9500    | C(8')-O(1')#1        | 1.261(4)   |
| C(4)-C(5)       | 1.418(6)  | C(8')-C(9')          | 1.510(6)   |
| C(4)-H(4)       | 0.9500    | C(9')-H(9A')         | 0.9800     |
| C(5)-C(6)       | 1.407(5)  | C(9')-H(9B')         | 0.9800     |
| C(5)-C(7)       | 1.442(6)  | C(9')-H(9C')         | 0.9800     |
| C(6)-C(6)#1     | 1.404(7)  |                      |            |
| C(7)-C(7)#1     | 1.350(9)  | N(1)-Pd(1)-C(1)#1    | 83.04(19)  |
| C(7)-H(7)       | 0.9500    | N(1)-Pd(1)-N(1)#1    | 83.04(19)  |
| C(8)-O(1)#3     | 1.249(3)  | C(1)#1-Pd(1)-N(1)#1  | 0.0(3)     |
| C(8)-C(9)       | 1.512(7)  | N(1)-Pd(1)-O(1)#1    | 176.69(12) |
| C(9)-H(9A)      | 0.9800    | C(1)#1-Pd(1)-O(1)#1  | 93.66(12)  |
| C(9)-H(9B)      | 0.9800    | N(1)#1-Pd(1)-O(1)#1  | 93.66(12)  |
| C(9)-H(9C)      | 0.9800    | N(1)-Pd(1)-O(1)      | 93.66(12)  |
| Pd(1')-N(1')    | 1.999(3)  | C(1)#1-Pd(1)-O(1)    | 176.70(12) |
| Pd(1')-C(1')#4  | 1.999(3)  | N(1)#1-Pd(1)-O(1)    | 176.70(12) |
| Pd(1')-N(1')#4  | 1.999(3)  | O(1)#1-Pd(1)-O(1)    | 89.64(14)  |
| Pd(1')-O(1')#4  | 2.086(3)  | N(1)-Pd(1)-Pd(1)#2   | 98.90(10)  |
| Pd(1')-O(1')    | 2.086(3)  | C(1)#1-Pd(1)-Pd(1)#2 | 98.90(10)  |
| Pd(1')-Pd(1')#5 | 2.8819(9) | N(1)#1-Pd(1)-Pd(1)#2 | 98.90(10)  |
| O(1')-C(8')     | 1.261(4)  | O(1)#1-Pd(1)-Pd(1)#2 | 81.76(7)   |
| N(1')-C(2')     | 1.351(5)  | O(1)-Pd(1)-Pd(1)#2   | 81.76(7)   |

|                        |            |                         |            |
|------------------------|------------|-------------------------|------------|
| C(8)-O(1)-Pd(1)        | 124.4(2)   | N(1')#4-Pd(1')-O(1')    | 176.01(12) |
| C(2)-N(1)-C(6)         | 119.0(3)   | O(1')#4-Pd(1')-O(1')    | 90.47(14)  |
| C(2)-N(1)-Pd(1)        | 129.3(3)   | N(1')-Pd(1')-Pd(1')#5   | 99.18(10)  |
| C(6)-N(1)-Pd(1)        | 111.7(2)   | C(1')#4-Pd(1')-Pd(1')#5 | 99.18(10)  |
| N(1)-C(2)-C(3)         | 120.2(4)   | N(1')#4-Pd(1')-Pd(1')#5 | 99.18(10)  |
| N(1)-C(2)-H(2)         | 119.9      | O(1')#4-Pd(1')-Pd(1')#5 | 81.39(8)   |
| C(3)-C(2)-H(2)         | 119.9      | O(1')-Pd(1')-Pd(1')#5   | 81.39(8)   |
| C(4)-C(3)-C(2)         | 121.6(4)   | C(8')-O(1')-Pd(1')      | 125.1(3)   |
| C(4)-C(3)-H(3)         | 119.2      | C(2')-N(1')-C(6')       | 118.3(3)   |
| C(2)-C(3)-H(3)         | 119.2      | C(2')-N(1')-Pd(1')      | 129.1(3)   |
| C(3)-C(4)-C(5)         | 119.9(4)   | C(6')-N(1')-Pd(1')      | 112.5(2)   |
| C(3)-C(4)-H(4)         | 120.1      | N(1')-C(2')-C(3')       | 120.5(4)   |
| C(5)-C(4)-H(4)         | 120.1      | N(1')-C(2')-H(2')       | 119.8      |
| C(6)-C(5)-C(4)         | 117.2(4)   | C(3')-C(2')-H(2')       | 119.8      |
| C(6)-C(5)-C(7)         | 117.4(3)   | C(4')-C(3')-C(2')       | 121.1(4)   |
| C(4)-C(5)-C(7)         | 125.4(4)   | C(4')-C(3')-H(3')       | 119.4      |
| N(1)-C(6)-C(6)#1       | 116.6(2)   | C(2')-C(3')-H(3')       | 119.4      |
| N(1)-C(6)-C(5)         | 122.2(3)   | C(3')-C(4')-C(5')       | 120.1(4)   |
| C(6)#1-C(6)-C(5)       | 121.1(2)   | C(3')-C(4')-H(4')       | 119.9      |
| C(7)#1-C(7)-C(5)       | 121.5(2)   | C(5')-C(4')-H(4')       | 119.9      |
| C(7)#1-C(7)-H(7)       | 119.2      | C(4')-C(5')-C(6')       | 116.3(3)   |
| C(5)-C(7)-H(7)         | 119.2      | C(4')-C(5')-C(7')       | 125.4(3)   |
| O(1)-C(8)-O(1)#3       | 127.7(4)   | C(6')-C(5')-C(7')       | 118.3(3)   |
| O(1)-C(8)-C(9)         | 116.2(2)   | N(1')-C(6')-C(5')       | 123.6(3)   |
| O(1)#3-C(8)-C(9)       | 116.2(2)   | N(1')-C(6')-C(6')#4     | 115.86(19) |
| C(8)-C(9)-H(9A)        | 109.5      | C(5')-C(6')-C(6')#4     | 120.5(2)   |
| C(8)-C(9)-H(9B)        | 109.5      | C(7')#4-C(7')-C(5')     | 121.3(2)   |
| C(8)-C(9)-H(9C)        | 109.5      | C(7')#4-C(7')-H(7')     | 119.4      |
| N(1')-Pd(1')-C(1')#4   | 82.49(19)  | C(5')-C(7')-H(7')       | 119.4      |
| N(1')-Pd(1')-N(1')#4   | 82.49(19)  | O(1')-C(8')-O(1')#1     | 126.9(4)   |
| C(1')#4-Pd(1')-N(1')#4 | 0.0(2)     | O(1')-C(8')-C(9')       | 116.5(2)   |
| N(1')-Pd(1')-O(1')#4   | 176.01(12) | O(1')#1-C(8')-C(9')     | 116.5(2)   |
| C(1')#4-Pd(1')-O(1')#4 | 93.52(12)  | C(8')-C(9')-H(9A')      | 109.5      |
| N(1')#4-Pd(1')-O(1')#4 | 93.52(12)  | C(8')-C(9')-H(9B')      | 109.5      |
| N(1')-Pd(1')-O(1')     | 93.52(12)  | C(8')-C(9')-H(9C')      | 109.5      |
| C(1')#4-Pd(1')-O(1')   | 176.01(12) |                         |            |

Symmetry transformations used to generate equivalent atoms:

#1  $x, -y+1/2, z$  #2  $-x+3/2, -y+1/2, z$  #3  $-x+3/2, y, z$

#4  $-x+1/2, y, z$  #5  $-x+1/2, -y+1/2, z$

### (Acetato)(10-benzo[*h*]quinolinato)-chloropalladium(III) Dimer (1) (CCDC 705506)

The compound was crystallized from a dichloromethane / pentane solution at  $-35\text{ }^{\circ}\text{C}$  as orange prisms. A crystal  $0.03\text{ mm} \times 0.03\text{ mm} \times 0.15\text{ mm}$  in size was selected, mounted on a nylon loop with Paratone-N oil, and transferred to a Bruker SMART APEX II diffractometer equipped with an Oxford Cryosystems 700 Series Cryostream Cooler and Mo  $K\alpha$  radiation ( $\lambda = 0.71073\text{ \AA}$ ). A total of 2762 frames were collected at  $193(2)\text{ K}$  to  $\theta_{\text{max}} = 25.00^{\circ}$  with an oscillation range of  $0.5^{\circ}/\text{frame}$ , and an exposure time of  $20\text{ s/frame}$  using the APEX2 suite of software. (Bruker AXS, 2006a) Data were collected to  $\theta_{\text{max}} = 25.00^{\circ}$  rather than the routine value of  $\theta_{\text{max}} = 27.50^{\circ}$  because the crystal examined did not exhibit usable diffraction beyond  $25.00^{\circ}$ . Unit cell refinement on all observed reflections, and data reduction with corrections for  $L_p$  and decay were performed using SAINT. (Bruker AXS, 2006b) Scaling and a numerical absorption correction were done using SADABS. (Bruker AXS, 2004) The minimum and maximum transmission factors were 0.7430 and 0.9395, respectively. A total of 37194 reflections were collected, 3313 were unique ( $R_{\text{int}} = 0.0770$ ), and 2701 had  $I > 2\sigma(I)$ . Systematic absences were consistent with the compound having

crystallized in the monoclinic space group Cc or C2/c. The latter centrosymmetric space group C2/c (No. 15) was selected based on an observed mean  $|E^2-1|$  value of 0.927 (versus the expectation values of 0.968 and 0.736 for centric and noncentric data, respectively).

The structure was solved by direct methods and refined by full-matrix least-squares on  $F^2$  using SHELXTL. (Bruker AXS, 2001) The asymmetric unit was found to contain a half molecule of the desired (acetato)(10-benzo[*h*]quinolinato)chloropalladium(III) dimer plus a disordered iodobenzene molecule, and an even more severely disordered solvent molecule that we believe to be dichloromethane. The palladium(III) dimer resides on Wyckoff position 4e and possesses crystallographically imposed two-fold symmetry. To the best of our knowledge, based on various models and occupancy tests, the chemical formulation for the compound is  $[\text{Pd}(\text{C}_2\text{H}_3\text{O}_2)(\text{C}_{13}\text{H}_8\text{N})\text{Cl}]_2 \cdot \text{C}_6\text{H}_5\text{I} \cdot \text{CH}_2\text{Cl}_2$ .

All of the nonhydrogen atoms were refined with anisotropic displacement coefficients. The hydrogen atoms were assigned isotropic displacement coefficients  $U(\text{H}) = 1.2U(\text{C})$  or  $1.5U(\text{C}_{\text{methyl}})$ , and their coordinates were allowed to ride on their respective carbons. The disordered iodobenzene molecule was treated with a two-site model [I(1), C(13), C(14), C(15), C(16), C(17), C(18)] and [I(1\*), C(13\*), C(14\*), C(15\*), C(16\*), C(17\*), C(18\*)] with refined site occupancy factors of 0.466 (3) and 0.034 (3), respectively. That two-site model also included rigid bond, similar  $U_{ij}$ , common plane, and distance restraints. The benzene rings were treated as idealized regular hexagons with C-C = 1.39 Å. Attempts to model the dichloromethane were without success. The best discrete-atom model for the disordered dichloromethane converged to  $wR(F^2) = 0.0860$ . However, due to nonsensical bond distances and angles, and unjustifiable occupancy factors, that discrete-atom model for the dichloromethane was ultimately abandoned in favor of the solvent-free model contained in this CIF file. The dichloromethane contributions to the intensity data were removed by the Squeeze/Bypass procedure (van der Sluis & Spek, 1990) implemented in Platon (Spek, 2003). The refinement converged to  $R(F) = 0.0336$ ,  $wR(F^2) = 0.0761$ , and  $S = 1.075$  for 2701 reflections with  $I > 2\sigma(I)$ , and  $R(F) = 0.0491$ ,  $wR(F^2) = 0.0804$ , and  $S = 1.075$  for 3313 unique reflections, 285 parameters, and 246 restraints. The maximum  $|\Delta/\sigma|$  in the final cycle of least-squares was 0.001, and the residual peaks on the final difference-Fourier map ranged from -0.816 to 0.355  $\text{e}\text{\AA}^{-3}$ . Scattering factors were taken from the International Tables for Crystallography, Volume C. (Maslen *et al.*, 1992, and Creagh & McAuley, 1992)

Table 1. Crystal data and structure refinement for **1**.

|                                 |                                                                                                 |                            |
|---------------------------------|-------------------------------------------------------------------------------------------------|----------------------------|
| Identification code             | <b>1</b> (CCDC 705006)                                                                          |                            |
| Formula                         | C <sub>37</sub> H <sub>29</sub> Cl <sub>4</sub> I N <sub>2</sub> O <sub>4</sub> Pd <sub>2</sub> |                            |
| Formula weight                  | 1047.12                                                                                         |                            |
| Temperature                     | 193(2) K                                                                                        |                            |
| Wavelength                      | 0.71073 Å                                                                                       |                            |
| Crystal system                  | Monoclinic                                                                                      |                            |
| Space group                     | C2/c (No. 15)                                                                                   |                            |
| Unit cell dimensions            | a = 16.7605(5) Å                                                                                | $\alpha = 90^\circ$        |
|                                 | b = 17.7508(5) Å                                                                                | $\beta = 117.053(2)^\circ$ |
|                                 | c = 14.1762(4) Å                                                                                | $\gamma = 90^\circ$        |
| Volume                          | 3756.13(19) Å <sup>3</sup>                                                                      |                            |
| Z                               | 4                                                                                               |                            |
| Density (calculated)            | 1.852 Mg/m <sup>3</sup>                                                                         |                            |
| Absorption coefficient          | 2.106 mm <sup>-1</sup>                                                                          |                            |
| F(000)                          | 2040                                                                                            |                            |
| Crystal size                    | 0.15 x 0.03 x 0.03 mm <sup>3</sup>                                                              |                            |
| Theta range for data collection | 1.78 to 25.00°                                                                                  |                            |
| Index ranges                    | -19 ≤ h ≤ 19, -21 ≤ k ≤ 21, -16 ≤ l ≤ 16                                                        |                            |
| Reflections collected           | 37194                                                                                           |                            |
| Independent reflections         | 3313 [R(int) = 0.0770]                                                                          |                            |
| Completeness to theta = 25.00°  | 100.0 %                                                                                         |                            |



|                                   |                                             |
|-----------------------------------|---------------------------------------------|
| Absorption correction             | Numerical                                   |
| Max. and min. transmission        | 0.9395 and 0.7430                           |
| Refinement method                 | Full-matrix least-squares on F <sup>2</sup> |
| Data / restraints / parameters    | 3313 / 246 / 285                            |
| Goodness-of-fit on F <sup>2</sup> | 1.075                                       |
| Final R indices [I > 2σ(I)]       | R1 = 0.0336, wR2 = 0.0761                   |
| R indices (all data)              | R1 = 0.0491, wR2 = 0.0804                   |
| Largest diff. peak and hole       | 0.355 and -0.816 e.Å <sup>-3</sup>          |

Table 2. Bond lengths [Å] and angles [°] for **1**.

|               |            |                      |            |
|---------------|------------|----------------------|------------|
| Pd(1)-C(10)   | 2.000(4)   | C(16)-H(16)          | 0.9500     |
| Pd(1)-N(1)    | 2.016(3)   | C(17)-C(18)          | 1.3900     |
| Pd(1)-O(1)    | 2.042(3)   | C(17)-H(17)          | 0.9500     |
| Pd(1)-O(2)#1  | 2.133(3)   | C(18)-H(18)          | 0.9500     |
| Pd(1)-Cl(1)   | 2.4167(10) | I(1*)-C(13*)         | 2.067(15)  |
| Pd(1)-Pd(1)#1 | 2.5672(5)  | C(13*)-C(14*)        | 1.3900     |
| N(1)-C(2)     | 1.344(5)   | C(13*)-C(18*)        | 1.3900     |
| N(1)-C(10B)   | 1.362(5)   | C(14*)-C(15*)        | 1.3900     |
| C(2)-C(3)     | 1.397(6)   | C(14*)-H(14*)        | 0.9500     |
| C(2)-H(2)     | 0.9500     | C(15*)-C(16*)        | 1.3900     |
| C(3)-C(4)     | 1.367(6)   | C(15*)-H(15*)        | 0.9500     |
| C(3)-H(3)     | 0.9500     | C(16*)-C(17*)        | 1.3900     |
| C(4)-C(4A)    | 1.401(6)   | C(16*)-H(16*)        | 0.9500     |
| C(4)-H(4)     | 0.9500     | C(17*)-C(18*)        | 1.3900     |
| C(4A)-C(10B)  | 1.414(5)   | C(17*)-H(17*)        | 0.9500     |
| C(4A)-C(5)    | 1.425(6)   | C(18*)-H(18*)        | 0.9500     |
| C(5)-C(6)     | 1.356(6)   | C(10)-Pd(1)-O(1)     | 92.55(13)  |
| C(5)-H(5)     | 0.9500     | N(1)-Pd(1)-O(1)      | 175.39(12) |
| C(6)-C(6A)    | 1.433(6)   | C(10)-Pd(1)-O(2)#1   | 177.37(13) |
| C(6)-H(6)     | 0.9500     | N(1)-Pd(1)-O(2)#1    | 94.61(12)  |
| C(6A)-C(7)    | 1.396(6)   | O(1)-Pd(1)-O(2)#1    | 89.94(11)  |
| C(6A)-C(10A)  | 1.408(5)   | C(10)-Pd(1)-Cl(1)    | 88.88(10)  |
| C(7)-C(8)     | 1.389(6)   | N(1)-Pd(1)-Cl(1)     | 90.48(9)   |
| C(7)-H(7)     | 0.9500     | O(1)-Pd(1)-Cl(1)     | 90.06(8)   |
| C(8)-C(9)     | 1.401(6)   | O(2)#1-Pd(1)-Cl(1)   | 91.94(7)   |
| C(8)-H(8)     | 0.9500     | C(10)-Pd(1)-Pd(1)#1  | 96.24(10)  |
| C(9)-C(10)    | 1.360(5)   | N(1)-Pd(1)-Pd(1)#1   | 95.66(8)   |
| C(9)-H(9)     | 0.9500     | O(1)-Pd(1)-Pd(1)#1   | 84.18(7)   |
| C(10)-C(10A)  | 1.398(5)   | O(2)#1-Pd(1)-Pd(1)#1 | 83.19(7)   |
| C(10A)-C(10B) | 1.407(5)   | Cl(1)-Pd(1)-Pd(1)#1  | 172.44(2)  |
| O(1)-C(11)    | 1.275(5)   | C(2)-N(1)-C(10B)     | 119.9(3)   |
| O(2)-C(11)    | 1.254(5)   | C(2)-N(1)-Pd(1)      | 127.8(3)   |
| O(2)-Pd(1)#1  | 2.133(3)   | C(10B)-N(1)-Pd(1)    | 112.3(2)   |
| C(11)-C(12)   | 1.494(6)   | N(1)-C(2)-C(3)       | 120.0(4)   |
| C(12)-H(12A)  | 0.9800     | N(1)-C(2)-H(2)       | 120.0      |
| C(12)-H(12B)  | 0.9800     | C(3)-C(2)-H(2)       | 120.0      |
| C(12)-H(12C)  | 0.9800     | C(4)-C(3)-C(2)       | 121.0(4)   |
| I(1)-C(13)    | 2.064(5)   | C(4)-C(3)-H(3)       | 119.5      |
| C(13)-C(14)   | 1.3900     | C(2)-C(3)-H(3)       | 119.5      |
| C(13)-C(18)   | 1.3900     | C(3)-C(4)-C(4A)      | 120.0(4)   |
| C(14)-C(15)   | 1.3900     | C(3)-C(4)-H(4)       | 120.0      |
| C(14)-H(14)   | 0.9500     | C(4A)-C(4)-H(4)      | 120.0      |
| C(15)-C(16)   | 1.3900     | C(4)-C(4A)-C(10B)    | 116.8(4)   |
| C(15)-H(15)   | 0.9500     | C(4)-C(4A)-C(5)      | 126.5(4)   |
| C(16)-C(17)   | 1.3900     | C(10B)-C(4A)-C(5)    | 116.6(4)   |

|                     |          |                      |           |
|---------------------|----------|----------------------|-----------|
| C(6)-C(5)-C(4A)     | 122.2(4) | H(12B)-C(12)-H(12C)  | 109.5     |
| C(6)-C(5)-H(5)      | 118.9    | C(14)-C(13)-C(18)    | 120.0     |
| C(4A)-C(5)-H(5)     | 118.9    | C(14)-C(13)-I(1)     | 118.9(3)  |
| C(5)-C(6)-C(6A)     | 121.6(4) | C(18)-C(13)-I(1)     | 121.1(3)  |
| C(5)-C(6)-H(6)      | 119.2    | C(15)-C(14)-C(13)    | 120.0     |
| C(6A)-C(6)-H(6)     | 119.2    | C(15)-C(14)-H(14)    | 120.0     |
| C(7)-C(6A)-C(10A)   | 117.5(4) | C(13)-C(14)-H(14)    | 120.0     |
| C(7)-C(6A)-C(6)     | 125.2(4) | C(14)-C(15)-C(16)    | 120.0     |
| C(10A)-C(6A)-C(6)   | 117.3(4) | C(14)-C(15)-H(15)    | 120.0     |
| C(8)-C(7)-C(6A)     | 120.4(4) | C(16)-C(15)-H(15)    | 120.0     |
| C(8)-C(7)-H(7)      | 119.8    | C(17)-C(16)-C(15)    | 120.0     |
| C(6A)-C(7)-H(7)     | 119.8    | C(17)-C(16)-H(16)    | 120.0     |
| C(7)-C(8)-C(9)      | 120.8(4) | C(15)-C(16)-H(16)    | 120.0     |
| C(7)-C(8)-H(8)      | 119.6    | C(16)-C(17)-C(18)    | 120.0     |
| C(9)-C(8)-H(8)      | 119.6    | C(16)-C(17)-H(17)    | 120.0     |
| C(10)-C(9)-C(8)     | 119.7(4) | C(18)-C(17)-H(17)    | 120.0     |
| C(10)-C(9)-H(9)     | 120.2    | C(17)-C(18)-C(13)    | 120.0     |
| C(8)-C(9)-H(9)      | 120.2    | C(17)-C(18)-H(18)    | 120.0     |
| C(9)-C(10)-C(10A)   | 119.9(3) | C(13)-C(18)-H(18)    | 120.0     |
| C(9)-C(10)-Pd(1)    | 129.3(3) | C(14*)-C(13*)-C(18*) | 120.0     |
| C(10A)-C(10)-Pd(1)  | 110.8(3) | C(14*)-C(13*)-I(1*)  | 119.8(10) |
| C(10)-C(10A)-C(10B) | 117.6(3) | C(18*)-C(13*)-I(1*)  | 120.2(10) |
| C(10)-C(10A)-C(6A)  | 121.6(4) | C(15*)-C(14*)-C(13*) | 120.0     |
| C(10B)-C(10A)-C(6A) | 120.7(4) | C(15*)-C(14*)-H(14*) | 120.0     |
| N(1)-C(10B)-C(10A)  | 116.2(3) | C(13*)-C(14*)-H(14*) | 120.0     |
| N(1)-C(10B)-C(4A)   | 122.2(3) | C(16*)-C(15*)-C(14*) | 120.0     |
| C(10A)-C(10B)-C(4A) | 121.5(4) | C(16*)-C(15*)-H(15*) | 120.0     |
| C(11)-O(1)-Pd(1)    | 121.3(2) | C(14*)-C(15*)-H(15*) | 120.0     |
| C(11)-O(2)-Pd(1)#1  | 117.9(2) | C(15*)-C(16*)-C(17*) | 120.0     |
| O(2)-C(11)-O(1)     | 124.4(4) | C(15*)-C(16*)-H(16*) | 120.0     |
| O(2)-C(11)-C(12)    | 119.3(4) | C(17*)-C(16*)-H(16*) | 120.0     |
| O(1)-C(11)-C(12)    | 116.2(4) | C(18*)-C(17*)-C(16*) | 120.0     |
| C(11)-C(12)-H(12A)  | 109.5    | C(18*)-C(17*)-H(17*) | 120.0     |
| C(11)-C(12)-H(12B)  | 109.5    | C(16*)-C(17*)-H(17*) | 120.0     |
| H(12A)-C(12)-H(12B) | 109.5    | C(17*)-C(18*)-C(13*) | 120.0     |
| C(11)-C(12)-H(12C)  | 109.5    | C(17*)-C(18*)-H(18*) | 120.0     |
| H(12A)-C(12)-H(12C) | 109.5    | C(13*)-C(18*)-H(18*) | 120.0     |

Symmetry transformations used to generate equivalent atoms: #1 -x+1,y,-z+3/2

### Tris( $\mu$ 2-acetato)-bis(benzo[h]quinolinato)- ( $\mu$ 2-chloro)-tripalladium(II) (3a) (CCDC 705007)

The compound was crystallized from a dichloromethane / pentane solution as orange plates. A crystal 0.030 mm x 0.095 mm x 0.150 mm in size was selected, mounted on a nylon loop with Paratone-N oil, and transferred to a Bruker SMART APEX II diffractometer equipped with an Oxford Cryosystems 700 Series Cryostream Cooler and Mo K $\alpha$  radiation ( $\lambda = 0.71073 \text{ \AA}$ ). A total of 2580 frames were collected at 193 (2) K to  $\theta_{\max} = 30.0^\circ$  with an oscillation range of  $0.5^\circ/\text{frame}$ , and an exposure time of 30 s/frame using the APEX2 suite of software. (Bruker AXS, 2001a) Unit cell refinement on all observed reflections, and data reduction with corrections for Lp and decay were performed using SAINT. (Bruker AXS, 2006b) Scaling and a numerical absorption correction were done using SADABS. (Bruker AXS, 2004) The minimum and maximum transmission factors were 0.7571 and 0.9434, respectively. A total of 36302 reflections were collected, 8529 were unique ( $R_{\text{int}} = 0.029$ ), and 7147 had  $I > 2\sigma(I)$ . A lack of systematic absences were consistent with the compound having crystallized in the triclinic space group P1 or  $\bar{P}1$ . The latter centrosymmetric space group  $\bar{P}1$  (No. 2) was selected based on an observed mean  $|E^2-1|$  value of 0.924 (versus the expectation values of 0.968 and 0.736 for centric and noncentric data, respectively).

The structure was solved by direct methods and refined by full-matrix least-squares on  $F^2$  using SHELXTL. (Bruker AXS, 2001) The centrosymmetric unit was found to contain one molecule of tris ( $\mu_2$ -acetato)-bis(benzo[*h*]quinolato)-( $\mu_2$ -chloro)- tripalladium(II). All of the nonhydrogen atoms were refined with anisotropic displacement coefficients. The hydrogen atoms were assigned isotropic displacement coefficients  $U(\text{H}) = 1.2U(\text{C})$  or  $1.5U(\text{C}_{\text{methyl}})$ , and their coordinates were allowed to ride on their respective carbons. During refinement, a residual peak was observed between the oxygen atoms of one of the bridging acetato ligands (O(5), O(6)), so attempts were made to treat that bridging site as compositionally disordered (i.e. partially occupied by an acetate and by a chloride). However, even with restraints, this model yielded Pd–Cl distances that were too long and a miniscule Cl site occupancy factor of 0.036 (4). Therefore, the residual peak was left unassigned and the refinement was completed with all atoms fully occupied. The refinement converged to  $R(F) = 0.0369$ ,  $wR(F^2) = 0.0792$ , and  $S = 1.091$  for 7147 reflections with  $I > 2\sigma(I)$ , and  $R(F) = 0.0479$ ,  $wR(F^2) = 0.0834$ , and  $S = 1.091$  for 8529 unique reflections and 400 parameters. The maximum  $|\Delta/\sigma|$  in the final cycle of least-squares was less than 0.001, and the residual peaks on the final difference-Fourier map ranged from -1.375 to 1.876  $\text{e}\text{\AA}^{-3}$ . Scattering factors were taken from the International Tables for Crystallography, Volume C. (Maslen *et al.*, 1992, and Creagh & McAuley, 1992)

Table 1. Crystal data and structure refinement for **3a**.

|                                   |                                                                                  |                             |  |
|-----------------------------------|----------------------------------------------------------------------------------|-----------------------------|--|
| Identification code               | <b>3a</b> (CCDC 705007)                                                          |                             |  |
| Empirical formula                 | C <sub>32</sub> H <sub>25</sub> Cl N <sub>2</sub> O <sub>6</sub> Pd <sub>3</sub> |                             |  |
| Formula weight                    | 888.19                                                                           |                             |  |
| Temperature                       | 193(2) K                                                                         |                             |  |
| Wavelength                        | 0.71073 Å                                                                        |                             |  |
| Crystal system                    | Triclinic                                                                        |                             |  |
| Space group                       | $P\bar{1}$ (No. 2)                                                               |                             |  |
| Unit cell dimensions              | $a = 10.0632(2)$ Å                                                               | $\alpha = 96.989(1)^\circ$  |  |
|                                   | $b = 11.2475(2)$ Å                                                               | $\beta = 95.423(1)^\circ$   |  |
|                                   | $c = 13.9230(2)$ Å                                                               | $\gamma = 108.992(1)^\circ$ |  |
| Volume                            | 1463.85(5) Å <sup>3</sup>                                                        |                             |  |
| Z                                 | 2                                                                                |                             |  |
| Density (calculated)              | 2.015 mg/m <sup>3</sup>                                                          |                             |  |
| Absorption coefficient            | 1.964 mm <sup>-1</sup>                                                           |                             |  |
| F(000)                            | 868                                                                              |                             |  |
| Crystal size                      | 0.150 x 0.095 x 0.030 mm <sup>3</sup>                                            |                             |  |
| Theta range for data collection   | 1.94 to 30.00°                                                                   |                             |  |
| Index ranges                      | -14 ≤ h ≤ 14, -15 ≤ k ≤ 15, -19 ≤ l ≤ 19                                         |                             |  |
| Reflections collected             | 36302                                                                            |                             |  |
| Independent reflections           | 8529 [R(int) = 0.0289]                                                           |                             |  |
| Completeness to theta = 30.00°    | 99.9 %                                                                           |                             |  |
| Absorption correction             | Numerical                                                                        |                             |  |
| Max. and min. transmission        | 0.9434 and 0.7571                                                                |                             |  |
| Refinement method                 | Full-matrix least-squares on F <sup>2</sup>                                      |                             |  |
| Data / restraints / parameters    | 8529 / 0 / 400                                                                   |                             |  |
| Goodness-of-fit on F <sup>2</sup> | 1.091                                                                            |                             |  |
| Final R indices [I > 2σ(I)]       | R1 = 0.0369, wR2 = 0.0792                                                        |                             |  |
| R indices (all data)              | R1 = 0.0479, wR2 = 0.0834                                                        |                             |  |
| Largest diff. peak and hole       | 1.876 and -1.375 e.Å <sup>-3</sup>                                               |                             |  |

Table 2. Bond lengths [Å] and angles [°] for **3a**.

|             |          |             |           |
|-------------|----------|-------------|-----------|
| Pd(1)-C(10) | 1.969(3) | Pd(1)-O(1)  | 2.140(3)  |
| Pd(1)-N(1)  | 2.022(3) | Pd(1)-Pd(2) | 2.9168(4) |
| Pd(1)-O(3)  | 2.052(2) | Pd(2)-O(5)  | 2.003(3)  |

|                   |            |                    |            |
|-------------------|------------|--------------------|------------|
| Pd(2)-O(2)        | 2.005(3)   | C(4')-C(4A')       | 1.401(7)   |
| Pd(2)-O(4)        | 2.021(3)   | C(4')-H(4')        | 0.9500     |
| Pd(2)-Cl(1)       | 2.2822(10) | C(4A')-C(10D)      | 1.408(5)   |
| Pd(3)-C(10')      | 1.974(4)   | C(4A')-C(5')       | 1.434(6)   |
| Pd(3)-N(1')       | 2.039(3)   | C(5')-C(6')        | 1.343(7)   |
| Pd(3)-O(6)        | 2.106(3)   | C(5')-H(5')        | 0.9500     |
| Pd(3)-Cl(1)       | 2.3068(10) | C(6')-C(6A')       | 1.437(6)   |
| N(1)-C(2)         | 1.328(5)   | C(6')-H(6')        | 0.9500     |
| N(1)-C(10B)       | 1.368(4)   | C(6A')-C(7')       | 1.389(7)   |
| C(2)-C(3)         | 1.392(5)   | C(6A')-C(10C)      | 1.414(5)   |
| C(2)-H(2)         | 0.9500     | C(7')-C(8')        | 1.366(7)   |
| C(3)-C(4)         | 1.369(6)   | C(7')-H(7')        | 0.9500     |
| C(3)-H(3)         | 0.9500     | C(8')-C(9')        | 1.416(6)   |
| C(4)-C(4A)        | 1.398(6)   | C(8')-H(8')        | 0.9500     |
| C(4)-H(4)         | 0.9500     | C(9')-C(10')       | 1.366(6)   |
| C(4A)-C(10B)      | 1.401(5)   | C(9')-H(9')        | 0.9500     |
| C(4A)-C(5)        | 1.436(6)   | C(10')-C(10C)      | 1.418(5)   |
| C(5)-C(6)         | 1.334(7)   | C(10C)-C(10D)      | 1.407(6)   |
| C(5)-H(5)         | 0.9500     | O(1)-C(11)         | 1.247(4)   |
| C(6)-C(6A)        | 1.436(6)   | O(2)-C(11)         | 1.260(4)   |
| C(6)-H(6)         | 0.9500     | C(11)-C(12)        | 1.507(5)   |
| C(6A)-C(7)        | 1.400(7)   | C(12)-H(12C)       | 0.9800     |
| C(6A)-C(10A)      | 1.405(5)   | C(12)-H(12B)       | 0.9800     |
| C(7)-C(8)         | 1.370(7)   | C(12)-H(12A)       | 0.9800     |
| C(7)-H(7)         | 0.9500     | O(3)-C(13)         | 1.254(4)   |
| C(8)-C(9)         | 1.401(6)   | O(4)-C(13)         | 1.256(4)   |
| C(8)-H(8)         | 0.9500     | C(13)-C(14)        | 1.509(5)   |
| C(9)-C(10)        | 1.377(6)   | C(14)-H(14A)       | 0.9800     |
| C(9)-H(9)         | 0.9500     | C(14)-H(14B)       | 0.9800     |
| C(10)-C(10A)      | 1.406(5)   | C(14)-H(14C)       | 0.9800     |
| C(10A)-C(10B)     | 1.412(5)   | O(5)-C(15)         | 1.256(5)   |
| N(1')-C(2')       | 1.322(5)   | O(6)-C(15)         | 1.246(5)   |
| N(1')-C(10D)      | 1.364(5)   | C(15)-C(16)        | 1.524(6)   |
| C(2')-C(3')       | 1.404(6)   | C(16)-H(16A)       | 0.9800     |
| C(2')-H(2')       | 0.9500     | C(16)-H(16B)       | 0.9800     |
| C(3')-C(4')       | 1.356(7)   | C(16)-H(16C)       | 0.9800     |
| C(3')-H(3')       | 0.9500     |                    |            |
| C(10)-Pd(1)-N(1)  | 82.71(14)  | O(4)-Pd(2)-Pd(1)   | 83.07(7)   |
| C(10)-Pd(1)-O(3)  | 91.09(13)  | Cl(1)-Pd(2)-Pd(1)  | 101.82(3)  |
| N(1)-Pd(1)-O(3)   | 171.31(11) | C(10')-Pd(3)-N(1') | 82.61(15)  |
| C(10)-Pd(1)-O(1)  | 174.02(13) | C(10')-Pd(3)-O(6)  | 170.51(14) |
| N(1)-Pd(1)-O(1)   | 92.10(11)  | N(1')-Pd(3)-O(6)   | 87.94(12)  |
| O(3)-Pd(1)-O(1)   | 93.74(11)  | C(10')-Pd(3)-Cl(1) | 93.57(12)  |
| C(10)-Pd(1)-Pd(2) | 108.68(10) | N(1')-Pd(3)-Cl(1)  | 175.55(9)  |
| N(1)-Pd(1)-Pd(2)  | 109.92(8)  | O(6)-Pd(3)-Cl(1)   | 95.91(8)   |
| O(3)-Pd(1)-Pd(2)  | 77.80(7)   | Pd(2)-Cl(1)-Pd(3)  | 106.27(4)  |
| O(1)-Pd(1)-Pd(2)  | 75.84(7)   | C(2)-N(1)-C(10B)   | 118.9(3)   |
| O(5)-Pd(2)-O(2)   | 172.05(11) | C(2)-N(1)-Pd(1)    | 128.2(2)   |
| O(5)-Pd(2)-O(4)   | 84.22(12)  | C(10B)-N(1)-Pd(1)  | 112.9(2)   |
| O(2)-Pd(2)-O(4)   | 90.26(11)  | N(1)-C(2)-C(3)     | 121.3(4)   |
| O(5)-Pd(2)-Cl(1)  | 97.12(9)   | N(1)-C(2)-H(2)     | 119.3      |
| O(2)-Pd(2)-Cl(1)  | 87.86(8)   | C(3)-C(2)-H(2)     | 119.3      |
| O(4)-Pd(2)-Cl(1)  | 174.57(8)  | C(4)-C(3)-C(2)     | 120.5(4)   |
| O(5)-Pd(2)-Pd(1)  | 100.16(8)  | C(4)-C(3)-H(3)     | 119.7      |
| O(2)-Pd(2)-Pd(1)  | 84.80(7)   | C(2)-C(3)-H(3)     | 119.7      |

---

|                     |          |                      |          |
|---------------------|----------|----------------------|----------|
| C(3)-C(4)-C(4A)     | 119.5(3) | C(7')-C(6A')-C(10C)  | 117.1(4) |
| C(3)-C(4)-H(4)      | 120.2    | C(7')-C(6A')-C(6')   | 124.6(4) |
| C(4A)-C(4)-H(4)     | 120.2    | C(10C)-C(6A')-C(6')  | 118.3(4) |
| C(4)-C(4A)-C(10B)   | 117.1(3) | C(8')-C(7')-C(6A')   | 120.6(4) |
| C(4)-C(4A)-C(5)     | 126.3(4) | C(8')-C(7')-H(7')    | 119.7    |
| C(10B)-C(4A)-C(5)   | 116.6(4) | C(6A')-C(7')-H(7')   | 119.7    |
| C(6)-C(5)-C(4A)     | 121.8(4) | C(7')-C(8')-C(9')    | 121.7(4) |
| C(6)-C(5)-H(5)      | 119.1    | C(7')-C(8')-H(8')    | 119.2    |
| C(4A)-C(5)-H(5)     | 119.1    | C(9')-C(8')-H(8')    | 119.2    |
| C(5)-C(6)-C(6A)     | 122.2(4) | C(10')-C(9')-C(8')   | 120.3(4) |
| C(5)-C(6)-H(6)      | 118.9    | C(10')-C(9')-H(9')   | 119.9    |
| C(6A)-C(6)-H(6)     | 118.9    | C(8')-C(9')-H(9')    | 119.9    |
| C(7)-C(6A)-C(10A)   | 117.3(4) | C(9')-C(10')-C(10C)  | 117.3(4) |
| C(7)-C(6A)-C(6)     | 125.3(4) | C(9')-C(10')-Pd(3)   | 131.2(3) |
| C(10A)-C(6A)-C(6)   | 117.4(4) | C(10C)-C(10')-Pd(3)  | 111.5(3) |
| C(8)-C(7)-C(6A)     | 120.0(4) | C(10D)-C(10C)-C(6A') | 119.2(4) |
| C(8)-C(7)-H(7)      | 120.0    | C(10D)-C(10C)-C(10') | 117.7(3) |
| C(6A)-C(7)-H(7)     | 120.0    | C(6A')-C(10C)-C(10') | 123.1(4) |
| C(7)-C(8)-C(9)      | 122.1(4) | N(1')-C(10D)-C(10C)  | 115.2(3) |
| C(7)-C(8)-H(8)      | 118.9    | N(1')-C(10D)-C(4A')  | 122.3(4) |
| C(9)-C(8)-H(8)      | 118.9    | C(10C)-C(10D)-C(4A') | 122.4(4) |
| C(10)-C(9)-C(8)     | 119.8(4) | C(11)-O(1)-Pd(1)     | 127.8(2) |
| C(10)-C(9)-H(9)     | 120.1    | C(11)-O(2)-Pd(2)     | 122.6(2) |
| C(8)-C(9)-H(9)      | 120.1    | O(1)-C(11)-O(2)      | 126.8(3) |
| C(9)-C(10)-C(10A)   | 117.8(3) | O(1)-C(11)-C(12)     | 117.3(3) |
| C(9)-C(10)-Pd(1)    | 130.2(3) | O(2)-C(11)-C(12)     | 115.9(3) |
| C(10A)-C(10)-Pd(1)  | 112.0(3) | C(11)-C(12)-H(12C)   | 109.5    |
| C(6A)-C(10A)-C(10)  | 123.0(4) | C(11)-C(12)-H(12B)   | 109.5    |
| C(6A)-C(10A)-C(10B) | 119.7(3) | H(12C)-C(12)-H(12B)  | 109.5    |
| C(10)-C(10A)-C(10B) | 117.3(3) | C(11)-C(12)-H(12A)   | 109.5    |
| N(1)-C(10B)-C(4A)   | 122.6(3) | H(12C)-C(12)-H(12A)  | 109.5    |
| N(1)-C(10B)-C(10A)  | 115.1(3) | H(12B)-C(12)-H(12A)  | 109.5    |
| C(4A)-C(10B)-C(10A) | 122.2(3) | C(13)-O(3)-Pd(1)     | 128.4(2) |
| C(2')-N(1')-C(10D)  | 119.0(3) | C(13)-O(4)-Pd(2)     | 123.4(2) |
| C(2')-N(1')-Pd(3)   | 128.1(3) | O(3)-C(13)-O(4)      | 126.7(3) |
| C(10D)-N(1')-Pd(3)  | 112.8(3) | O(3)-C(13)-C(14)     | 116.9(3) |
| N(1')-C(2')-C(3')   | 121.5(4) | O(4)-C(13)-C(14)     | 116.4(3) |
| N(1')-C(2')-H(2')   | 119.3    | C(13)-C(14)-H(14A)   | 109.5    |
| C(3')-C(2')-H(2')   | 119.3    | C(13)-C(14)-H(14B)   | 109.5    |
| C(4')-C(3')-C(2')   | 120.3(4) | H(14A)-C(14)-H(14B)  | 109.5    |
| C(4')-C(3')-H(3')   | 119.8    | C(13)-C(14)-H(14C)   | 109.5    |
| C(2')-C(3')-H(3')   | 119.8    | H(14A)-C(14)-H(14C)  | 109.5    |
| C(3')-C(4')-C(4A')  | 119.7(4) | H(14B)-C(14)-H(14C)  | 109.5    |
| C(3')-C(4')-H(4')   | 120.2    | C(15)-O(5)-Pd(2)     | 129.0(3) |
| C(4A')-C(4')-H(4')  | 120.2    | C(15)-O(6)-Pd(3)     | 137.3(3) |
| C(4')-C(4A')-C(10D) | 117.2(4) | O(6)-C(15)-O(5)      | 128.1(4) |
| C(4')-C(4A')-C(5')  | 126.1(4) | O(6)-C(15)-C(16)     | 117.0(4) |
| C(10D)-C(4A')-C(5') | 116.8(4) | O(5)-C(15)-C(16)     | 115.0(4) |
| C(6')-C(5')-C(4A')  | 121.9(4) | C(15)-C(16)-H(16A)   | 109.5    |
| C(6')-C(5')-H(5')   | 119.1    | C(15)-C(16)-H(16B)   | 109.5    |
| C(4A')-C(5')-H(5')  | 119.1    | H(16A)-C(16)-H(16B)  | 109.5    |
| C(5')-C(6')-C(6A')  | 121.5(4) | C(15)-C(16)-H(16C)   | 109.5    |
| C(5')-C(6')-H(6')   | 119.3    | H(16A)-C(16)-H(16C)  | 109.5    |
| C(6A')-C(6')-H(6')  | 119.3    | H(16B)-C(16)-H(16C)  | 109.5    |

---

**Bis( $\mu$ 2-acetato)-bis(benzo[h]quinolinato)-bis(acetatopalladium(III)) (10) CCDC 705008)**

The compound was crystallized from a dichloromethane solution at  $-35\text{ }^{\circ}\text{C}$  as dark red plates. A crystal  $0.010\text{ mm} \times 0.125\text{ mm} \times 0.125\text{ mm}$  in size was selected, mounted on a nylon loop with Paratone-N oil, and transferred to a Bruker SMART APEX II diffractometer equipped with an Oxford Cryosystems 700 Series Cryostream Cooler and Mo  $K\alpha$  radiation ( $\lambda = 0.71073\text{ \AA}$ ). A total of 694 frames were collected at  $193(2)\text{ K}$  to  $\theta_{\text{max}} = 25.0^{\circ}$  with an oscillation range of  $0.5^{\circ}/\text{frame}$ , and an exposure time of  $90\text{ s/frame}$  using the APEX2 suite of software. (Bruker AXS, 2001a) Unit cell refinement on all observed reflections and data reduction with corrections for  $L_p$  and decay were performed using SAINT. (Bruker AXS, 2006b) Scaling and a numerical absorption correction were done using SADABS. (Bruker AXS, 2004) The minimum and maximum transmission factors were 0.8536 and 0.9870, respectively. A total of 36560 reflections were collected, 6548 were unique ( $R_{\text{int}} = 0.102$ ), and 4318 had  $I > 2\sigma(I)$ . Systematic absences were consistent with the compound having crystallized in the orthorhombic space group  $Pbca$  (No. 61). The observed mean  $|E^2 - 1|$  value was 0.958 (versus the expectation values of 0.968 and 0.736 for centric and noncentric data, respectively).

The structure was solved by direct methods and refined by full-matrix least-squares on  $F^2$  using SHELXTL. (Bruker AXS, 2001) The centrosymmetric unit was found to contain one molecule of Bis(acetato)bis( $\mu$ 2-acetato)-bis(10-benzo[h]quinolato)- dipalladium(III) and two molecules of dichloromethane. All of the nonhydrogen atoms were refined with anisotropic displacement coefficients. All of the hydrogen atoms were assigned isotropic displacement coefficients  $U(\text{H}) = 1.2U(\text{C})$  or  $1.5U(\text{C}_{\text{methyl}})$ , and their coordinates were allowed to ride on their respective carbons. The ligating atoms of the 10-benzo[h]quinolinato ligands exhibited signs of compositional disorder. This was treated with a two-site model  $[\text{N}(1), \text{C}(12)]$ ,  $[\text{N}(1'), \text{C}(12')]$  and  $[\text{C}(1), \text{N}(12)]$ ,  $[\text{C}(1'), \text{N}(12')]$  with refined site occupancy factors of 0.78 (3) and 0.22 (3), respectively. The dichloromethane molecules were disordered and were treated with three-site models, i.e.,  $[\text{C}(1\text{S}), \text{Cl}(1), \text{Cl}(2)]$ ,  $[\text{C}(1\text{S}'), \text{Cl}(1'), \text{Cl}(2')]$ ,  $[\text{C}(1\text{S}"), \text{Cl}(1''), \text{Cl}(2'')]$ ,  $[\text{C}(2\text{S}), \text{Cl}(3), \text{Cl}(4)]$ ,  $[\text{C}(2\text{S}'), \text{Cl}(3'), \text{Cl}(4')]$ ,  $[\text{C}(2\text{S}"), \text{Cl}(3''), \text{Cl}(4'')]$  with fixed site occupancy factors of 0.763 (4), 0.125 (5), 0.112 (4), 0.352 (4), 0.29 (4), and 0.36 (3) based on population refinement tests and included in the least-squares refinement with 1,2-distance, 1,3-distance, rigid-bond, and similar  $U_{ij}$  restraints. The refinement converged to  $R(F) = 0.0428$ ,  $wR(F^2) = 0.0819$ , and  $S = 1.005$  for 4318 reflections with  $I > 2\sigma(I)$ , and  $R(F) = 0.0866$ ,  $wR(F^2) = 0.0969$ , and  $S = 1.005$  for 6548 unique reflections, 582 parameters, and 444 restraints. The maximum  $|\Delta/\sigma|$  in the final cycle of least-squares was 0.002, and the residual peaks on the final difference-Fourier map ranged from  $-0.504$  to  $0.630\text{ e}\text{\AA}^{-3}$ . Scattering factors were taken from the International Tables for Crystallography, Volume C. (Maslen et al., 1992, and Creagh & McAuley, 1992)

**References**

- Bruker AXS (2001). *SHELXTL v6.12*. Bruker Analytical X-ray Systems Inc., Madison, Wisconsin, USA.
- Bruker AXS (2004). *SADABS*. Bruker Analytical X-ray Systems Inc., Madison, Wisconsin, USA.
- Bruker AXS (2006a). *APEX2 v2.1-0*. Bruker Analytical X-ray Systems Inc., Madison, Wisconsin, USA.
- Bruker AXS (2006b). *SAINT V7.34A*. Bruker Analytical X-ray Systems Inc., Madison, Wisconsin, USA.
- Creagh, D. C. & McAuley, W. J. (1992). *International Tables for Crystallography: Mathematical, Physical and Chemical Tables*, Vol C, edited by A. J. C. Wilson, pp. 206-222. Dordrecht, The Netherlands: Kluwer.
- Maslen, E. N., Fox, A. G. & O'Keefe, M. A. (1992). *International Tables for Crystallography: Mathematical, Physical and Chemical Tables*, Vol C, edited by A. J. C. Wilson, pp. 476-516. Dordrecht, The Netherlands: Kluwer.
- $R(F) = R1 = \sum ||F_o| - |F_c|| / \sum |F_o|$ ,  $wR(F^2) = wR2 = [ \sum w (F_o^2 - F_c^2)^2 / \sum w (F_o^2)^2 ]^{1/2}$ , and  $S = \text{Goodness-of-fit on } F^2 = [ \sum w (F_o^2 - F_c^2)^2 / (n-p) ]^{1/2}$ , where  $n$  is the number of reflections and  $p$  is the number of parameters refined.

Table 1. Crystal data and structure refinement for **10**.

|                     |                         |
|---------------------|-------------------------|
| Identification code | <b>10</b> (CCDC 705008) |
| Formula             | C36 H32 Cl4 N2 O8 Pd2   |

|                                   |                                             |                     |
|-----------------------------------|---------------------------------------------|---------------------|
| Formula weight                    | 975.24                                      |                     |
| Temperature                       | 193(2) K                                    |                     |
| Wavelength                        | 0.71073 Å                                   |                     |
| Crystal system                    | Orthorhombic                                |                     |
| Space group                       | Pbca (No. 16)                               |                     |
| Unit cell dimensions              | a = 16.3668(4) Å                            | $\alpha = 90^\circ$ |
|                                   | b = 17.4864(4) Å                            | $\beta = 90^\circ$  |
|                                   | c = 26.0050(6) Å                            | $\gamma = 90^\circ$ |
| Volume                            | 7442.5(3) Å <sup>3</sup>                    |                     |
| Z                                 | 8                                           |                     |
| Density (calculated)              | 1.741 mg/m <sup>3</sup>                     |                     |
| Absorption coefficient            | 1.308 mm <sup>-1</sup>                      |                     |
| F(000)                            | 3888                                        |                     |
| Crystal size                      | 0.125 x 0.125 x 0.010 mm <sup>3</sup>       |                     |
| Theta range for data collection   | 1.88 to 25.00°                              |                     |
| Index ranges                      | -19<=h<=17, -20<=k<=20, -23<=l<=30          |                     |
| Reflections collected             | 36560                                       |                     |
| Independent reflections           | 6548 [R(int) = 0.1022]                      |                     |
| Completeness to theta = 25.00°    | 100.0 %                                     |                     |
| Absorption correction             | Numerical                                   |                     |
| Max. and min. transmission        | 0.9870 and 0.8536                           |                     |
| Refinement method                 | Full-matrix least-squares on F <sup>2</sup> |                     |
| Data / restraints / parameters    | 6548 / 444 / 582                            |                     |
| Goodness-of-fit on F <sup>2</sup> | 1.005                                       |                     |
| Final R indices [I>2sigma(I)]     | R1 = 0.0428, wR2 = 0.0819                   |                     |
| R indices (all data)              | R1 = 0.0866, wR2 = 0.0969                   |                     |
| Largest diff. peak and hole       | 0.630 and -0.504 e.Å <sup>-3</sup>          |                     |

Table 2. Bond lengths [Å] and angles [°] for **10**.

|            |           |              |          |
|------------|-----------|--------------|----------|
| Pd-N(1)    | 2.002(5)  | C(8)-C(13)   | 1.401(7) |
| Pd-C(12)   | 2.006(5)  | C(8)-C(9)    | 1.409(8) |
| Pd-O(5)    | 2.042(4)  | C(9)-C(10)   | 1.356(8) |
| Pd-O(3)    | 2.108(4)  | C(9)-H(9)    | 0.9500   |
| Pd-O(1)    | 2.120(4)  | C(10)-C(11)  | 1.411(8) |
| Pd-Pd'     | 2.5681(5) | C(10)-H(10)  | 0.9500   |
| Pd'-C(12') | 1.988(5)  | C(11)-C(12)  | 1.360(7) |
| Pd'-N(1')  | 2.009(4)  | C(11)-H(11)  | 0.9500   |
| Pd'-O(4)   | 2.043(4)  | C(12)-C(13)  | 1.379(7) |
| Pd'-O(7)   | 2.107(4)  | C(13)-C(14)  | 1.422(8) |
| Pd'-O(6)   | 2.118(4)  | N(1')-C(2')  | 1.349(7) |
| N(1)-C(2)  | 1.340(7)  | N(1')-C(14') | 1.361(7) |
| N(1)-C(14) | 1.367(7)  | C(2')-C(3')  | 1.394(8) |
| C(2)-C(3)  | 1.391(8)  | C(2')-H(2')  | 0.9500   |
| C(2)-H(2)  | 0.9500    | C(3')-C(4')  | 1.371(8) |
| C(3)-C(4)  | 1.355(9)  | C(3')-H(3')  | 0.9500   |
| C(3)-H(3)  | 0.9500    | C(4')-C(5')  | 1.402(8) |
| C(4)-C(5)  | 1.391(8)  | C(4')-H(4')  | 0.9500   |
| C(4)-H(4)  | 0.9500    | C(5')-C(14') | 1.391(7) |
| C(5)-C(14) | 1.398(8)  | C(5')-C(6')  | 1.423(8) |
| C(5)-C(6)  | 1.444(8)  | C(6')-C(7')  | 1.348(8) |
| C(6)-C(7)  | 1.349(9)  | C(6')-H(6')  | 0.9500   |
| C(6)-H(6)  | 0.9500    | C(7')-C(8')  | 1.429(8) |
| C(7)-C(8)  | 1.427(8)  | C(7')-H(7')  | 0.9500   |
| C(7)-H(7)  | 0.9500    | C(8')-C(13') | 1.402(7) |

|                  |            |                 |            |
|------------------|------------|-----------------|------------|
| C(8')-C(9')      | 1.416(8)   | C(21)-C(22)     | 1.495(8)   |
| C(9')-C(10')     | 1.365(8)   | C(22)-H(22A)    | 0.9800     |
| C(9')-H(9')      | 0.9500     | C(22)-H(22B)    | 0.9800     |
| C(10')-C(11')    | 1.392(8)   | C(22)-H(22C)    | 0.9800     |
| C(10')-H(10')    | 0.9500     | C(1S)-Cl(1)     | 1.756(7)   |
| C(11')-C(12')    | 1.367(7)   | C(1S)-Cl(2)     | 1.765(6)   |
| C(11')-H(11')    | 0.9500     | C(1S)-H(1SA)    | 0.9900     |
| C(12')-C(13')    | 1.387(7)   | C(1S)-H(1SB)    | 0.9900     |
| C(13')-C(14')    | 1.421(7)   | C(1S')-Cl(2')   | 1.761(7)   |
| O(1)-C(15)       | 1.285(7)   | C(1S')-Cl(1')   | 1.761(7)   |
| O(2)-C(15)       | 1.215(7)   | C(1S')-H(1SC)   | 0.9900     |
| C(15)-C(16)      | 1.517(7)   | C(1S')-H(1SD)   | 0.9900     |
| C(16)-H(16A)     | 0.9800     | C(1S'')-Cl(2'') | 1.759(7)   |
| C(16)-H(16B)     | 0.9800     | C(1S'')-Cl(1'') | 1.762(7)   |
| C(16)-H(16C)     | 0.9800     | C(1S'')-H(1SE)  | 0.9900     |
| O(3)-C(17)       | 1.253(6)   | C(1S'')-H(1SF)  | 0.9900     |
| O(4)-C(17)       | 1.272(6)   | C(2S)-Cl(4)     | 1.760(7)   |
| C(17)-C(18)      | 1.493(8)   | C(2S)-Cl(3)     | 1.762(7)   |
| C(18)-H(18A)     | 0.9800     | C(2S)-H(2SA)    | 0.9900     |
| C(18)-H(18B)     | 0.9800     | C(2S)-H(2SB)    | 0.9900     |
| C(18)-H(18C)     | 0.9800     | C(2S')-Cl(4')   | 1.760(7)   |
| O(5)-C(19)       | 1.269(6)   | C(2S')-Cl(3')   | 1.764(7)   |
| O(6)-C(19)       | 1.252(6)   | C(2S')-H(2SC)   | 0.9900     |
| C(19)-C(20)      | 1.490(8)   | C(2S')-H(2SD)   | 0.9900     |
| C(20)-H(20A)     | 0.9800     | C(2S'')-Cl(4'') | 1.761(7)   |
| C(20)-H(20B)     | 0.9800     | C(2S'')-Cl(3'') | 1.764(7)   |
| C(20)-H(20C)     | 0.9800     | C(2S'')-H(2SE)  | 0.9900     |
| O(7)-C(21)       | 1.303(6)   | C(2S'')-H(2SF)  | 0.9900     |
| O(8)-C(21)       | 1.219(6)   |                 |            |
| N(1)-Pd-C(12)    | 82.8(2)    | N(1')-Pd'-Pd    | 96.42(12)  |
| N(1)-Pd-O(5)     | 177.54(17) | O(4)-Pd'-Pd     | 83.73(10)  |
| C(12)-Pd-O(5)    | 94.74(19)  | O(7)-Pd'-Pd     | 163.64(11) |
| N(1)-Pd-O(3)     | 93.96(17)  | O(6)-Pd'-Pd     | 83.87(10)  |
| C(12)-Pd-O(3)    | 176.69(18) | C(2)-N(1)-C(14) | 118.9(5)   |
| O(5)-Pd-O(3)     | 88.49(15)  | C(2)-N(1)-Pd    | 128.4(4)   |
| N(1)-Pd-O(1)     | 85.97(16)  | C(14)-N(1)-Pd   | 112.7(4)   |
| C(12)-Pd-O(1)    | 92.24(17)  | N(1)-C(2)-C(3)  | 121.0(6)   |
| O(5)-Pd-O(1)     | 94.14(15)  | N(1)-C(2)-H(2)  | 119.5      |
| O(3)-Pd-O(1)     | 86.83(15)  | C(3)-C(2)-H(2)  | 119.5      |
| N(1)-Pd-Pd'      | 96.80(12)  | C(4)-C(3)-C(2)  | 120.3(6)   |
| C(12)-Pd-Pd'     | 96.93(14)  | C(4)-C(3)-H(3)  | 119.9      |
| O(5)-Pd-Pd'      | 83.48(10)  | C(2)-C(3)-H(3)  | 119.9      |
| O(3)-Pd-Pd'      | 84.11(10)  | C(3)-C(4)-C(5)  | 120.5(6)   |
| O(1)-Pd-Pd'      | 170.68(11) | C(3)-C(4)-H(4)  | 119.8      |
| C(12')-Pd'-N(1') | 82.25(19)  | C(5)-C(4)-H(4)  | 119.8      |
| C(12')-Pd'-O(4)  | 93.89(18)  | C(4)-C(5)-C(14) | 117.1(6)   |
| N(1')-Pd'-O(4)   | 176.13(17) | C(4)-C(5)-C(6)  | 126.4(6)   |
| C(12')-Pd'-O(7)  | 97.03(17)  | C(14)-C(5)-C(6) | 116.5(6)   |
| N(1')-Pd'-O(7)   | 95.29(16)  | C(7)-C(6)-C(5)  | 122.1(6)   |
| O(4)-Pd'-O(7)    | 85.35(15)  | C(7)-C(6)-H(6)  | 118.9      |
| C(12')-Pd'-O(6)  | 176.55(18) | C(5)-C(6)-H(6)  | 118.9      |
| N(1')-Pd'-O(6)   | 94.36(17)  | C(6)-C(7)-C(8)  | 121.3(6)   |
| O(4)-Pd'-O(6)    | 89.50(15)  | C(6)-C(7)-H(7)  | 119.4      |
| O(7)-Pd'-O(6)    | 83.89(15)  | C(8)-C(7)-H(7)  | 119.4      |
| C(12')-Pd'-Pd    | 95.83(13)  | C(13)-C(8)-C(9) | 117.0(6)   |



|                      |          |                      |          |
|----------------------|----------|----------------------|----------|
| C(13)-C(8)-C(7)      | 118.4(6) | C(12')-C(13')-C(8')  | 123.6(5) |
| C(9)-C(8)-C(7)       | 124.5(6) | C(12')-C(13')-C(14') | 116.8(5) |
| C(10)-C(9)-C(8)      | 119.3(6) | C(8')-C(13')-C(14')  | 119.7(5) |
| C(10)-C(9)-H(9)      | 120.3    | N(1')-C(14')-C(5')   | 122.9(5) |
| C(8)-C(9)-H(9)       | 120.3    | N(1')-C(14')-C(13')  | 115.4(5) |
| C(9)-C(10)-C(11)     | 122.9(6) | C(5')-C(14')-C(13')  | 121.7(5) |
| C(9)-C(10)-H(10)     | 118.5    | C(15)-O(1)-Pd        | 123.4(4) |
| C(11)-C(10)-H(10)    | 118.5    | O(2)-C(15)-O(1)      | 126.3(5) |
| C(12)-C(11)-C(10)    | 118.1(6) | O(2)-C(15)-C(16)     | 119.4(6) |
| C(12)-C(11)-H(11)    | 121.0    | O(1)-C(15)-C(16)     | 114.3(5) |
| C(10)-C(11)-H(11)    | 121.0    | C(15)-C(16)-H(16A)   | 109.5    |
| C(11)-C(12)-C(13)    | 119.8(5) | C(15)-C(16)-H(16B)   | 109.5    |
| C(11)-C(12)-Pd       | 128.9(4) | H(16A)-C(16)-H(16B)  | 109.5    |
| C(13)-C(12)-Pd       | 111.3(4) | C(15)-C(16)-H(16C)   | 109.5    |
| C(12)-C(13)-C(8)     | 122.8(5) | H(16A)-C(16)-H(16C)  | 109.5    |
| C(12)-C(13)-C(14)    | 117.4(5) | H(16B)-C(16)-H(16C)  | 109.5    |
| C(8)-C(13)-C(14)     | 119.8(5) | C(17)-O(3)-Pd        | 117.9(3) |
| N(1)-C(14)-C(5)      | 122.3(5) | C(17)-O(4)-Pd'       | 122.0(4) |
| N(1)-C(14)-C(13)     | 115.8(5) | O(3)-C(17)-O(4)      | 124.6(5) |
| C(5)-C(14)-C(13)     | 121.9(5) | O(3)-C(17)-C(18)     | 119.4(5) |
| C(2')-N(1')-C(14')   | 120.1(5) | O(4)-C(17)-C(18)     | 116.0(5) |
| C(2')-N(1')-Pd'      | 126.6(4) | C(17)-C(18)-H(18A)   | 109.5    |
| C(14')-N(1')-Pd'     | 113.3(3) | C(17)-C(18)-H(18B)   | 109.5    |
| N(1')-C(2')-C(3')    | 118.9(5) | H(18A)-C(18)-H(18B)  | 109.5    |
| N(1')-C(2')-H(2')    | 120.6    | C(17)-C(18)-H(18C)   | 109.5    |
| C(3')-C(2')-H(2')    | 120.6    | H(18A)-C(18)-H(18C)  | 109.5    |
| C(4')-C(3')-C(2')    | 121.7(6) | H(18B)-C(18)-H(18C)  | 109.5    |
| C(4')-C(3')-H(3')    | 119.1    | C(19)-O(5)-Pd        | 122.2(3) |
| C(2')-C(3')-H(3')    | 119.1    | C(19)-O(6)-Pd'       | 117.5(3) |
| C(3')-C(4')-C(5')    | 119.4(5) | O(6)-C(19)-O(5)      | 124.5(5) |
| C(3')-C(4')-H(4')    | 120.3    | O(6)-C(19)-C(20)     | 118.7(5) |
| C(5')-C(4')-H(4')    | 120.3    | O(5)-C(19)-C(20)     | 116.8(5) |
| C(14')-C(5')-C(4')   | 117.0(5) | C(19)-C(20)-H(20A)   | 109.5    |
| C(14')-C(5')-C(6')   | 117.6(5) | C(19)-C(20)-H(20B)   | 109.5    |
| C(4')-C(5')-C(6')    | 125.5(6) | H(20A)-C(20)-H(20B)  | 109.5    |
| C(7')-C(6')-C(5')    | 121.3(6) | C(19)-C(20)-H(20C)   | 109.5    |
| C(7')-C(6')-H(6')    | 119.4    | H(20A)-C(20)-H(20C)  | 109.5    |
| C(5')-C(6')-H(6')    | 119.4    | H(20B)-C(20)-H(20C)  | 109.5    |
| C(6')-C(7')-C(8')    | 122.1(5) | C(21)-O(7)-Pd'       | 127.0(4) |
| C(6')-C(7')-H(7')    | 118.9    | O(8)-C(21)-O(7)      | 124.9(5) |
| C(8')-C(7')-H(7')    | 118.9    | O(8)-C(21)-C(22)     | 120.8(5) |
| C(13')-C(8')-C(9')   | 115.8(5) | O(7)-C(21)-C(22)     | 114.2(5) |
| C(13')-C(8')-C(7')   | 117.6(5) | C(21)-C(22)-H(22A)   | 109.5    |
| C(9')-C(8')-C(7')    | 126.5(5) | C(21)-C(22)-H(22B)   | 109.5    |
| C(10')-C(9')-C(8')   | 120.0(6) | H(22A)-C(22)-H(22B)  | 109.5    |
| C(10')-C(9')-H(9')   | 120.0    | C(21)-C(22)-H(22C)   | 109.5    |
| C(8')-C(9')-H(9')    | 120.0    | H(22A)-C(22)-H(22C)  | 109.5    |
| C(9')-C(10')-C(11')  | 122.6(6) | H(22B)-C(22)-H(22C)  | 109.5    |
| C(9')-C(10')-H(10')  | 118.7    | Cl(1)-C(1S)-Cl(2)    | 113.5(6) |
| C(11')-C(10')-H(10') | 118.7    | Cl(1)-C(1S)-H(1SA)   | 108.9    |
| C(12')-C(11')-C(10') | 118.9(6) | Cl(2)-C(1S)-H(1SA)   | 108.9    |
| C(12')-C(11')-H(11') | 120.6    | Cl(1)-C(1S)-H(1SB)   | 108.9    |
| C(10')-C(11')-H(11') | 120.6    | Cl(2)-C(1S)-H(1SB)   | 108.9    |
| C(11')-C(12')-C(13') | 119.0(5) | H(1SA)-C(1S)-H(1SB)  | 107.7    |
| C(11')-C(12')-Pd'    | 128.8(4) | Cl(2')-C(1S')-Cl(1') | 112.6(9) |
| C(13')-C(12')-Pd'    | 112.2(4) | Cl(2')-C(1S')-H(1SC) | 109.1    |

|                         |          |                         |          |
|-------------------------|----------|-------------------------|----------|
| Cl(1')-C(1S')-H(1SC)    | 109.1    | Cl(3)-C(2S)-H(2SB)      | 109.2    |
| Cl(2')-C(1S')-H(1SD)    | 109.1    | H(2SA)-C(2S)-H(2SB)     | 107.9    |
| Cl(1')-C(1S')-H(1SD)    | 109.1    | Cl(4')-C(2S')-Cl(3')    | 111.9(8) |
| H(1SC)-C(1S')-H(1SD)    | 107.8    | Cl(4')-C(2S')-H(2SC)    | 109.2    |
| Cl(2'')-C(1S'')-Cl(1'') | 112.9(9) | Cl(3'')-C(2S'')-H(2SC)  | 109.2    |
| Cl(2'')-C(1S'')-H(1SE)  | 109.0    | Cl(4'')-C(2S'')-H(2SD)  | 109.2    |
| Cl(1'')-C(1S'')-H(1SE)  | 109.0    | Cl(3'')-C(2S'')-H(2SD)  | 109.2    |
| Cl(2'')-C(1S'')-H(1SF)  | 109.0    | H(2SC)-C(2S'')-H(2SD)   | 107.9    |
| Cl(1'')-C(1S'')-H(1SF)  | 109.0    | Cl(4'')-C(2S'')-Cl(3'') | 110.4(8) |
| H(1SE)-C(1S'')-H(1SF)   | 107.8    | Cl(4'')-C(2S'')-H(2SE)  | 109.6    |
| Cl(4)-C(2S)-Cl(3)       | 112.0(8) | Cl(3'')-C(2S'')-H(2SE)  | 109.6    |
| Cl(4)-C(2S)-H(2SA)      | 109.2    | Cl(4'')-C(2S'')-H(2SF)  | 109.6    |
| Cl(3)-C(2S)-H(2SA)      | 109.2    | Cl(3'')-C(2S'')-H(2SF)  | 109.6    |
| Cl(4)-C(2S)-H(2SB)      | 109.2    | H(2SE)-C(2S'')-H(2SF)   | 108.1    |

## Appendix E: Reactivity of **1** with Exogenous Benzo[*h*]quinoline (**8**)<sup>8</sup>

### Synthesis of **1** in the Presence of Benzo[*h*]quinoline (**8**)

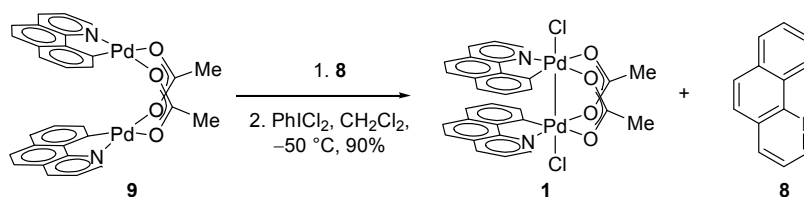

To a solution of benzo[*h*]quinolinyl palladium acetate dimer (**9**) (17.3 mg,  $2.51 \times 10^{-5}$  mol, 1.00 equiv) and benzo[*h*]quinoline (**8**) (18.0 mg,  $1.04 \times 10^{-4}$  mol, 4.00 equiv) in  $\text{CH}_2\text{Cl}_2$  (3.0 mL) at  $-50^\circ\text{C}$  was added  $\text{PhICl}_2$  (6.9 mg,  $2.5 \times 10^{-5}$  mol, 1.0 equiv). The color of the solution immediately changed from pale yellow to dark red-brown. After stirring at  $-50^\circ\text{C}$  for 10 minutes, solvent was removed *in vacuo* at  $-50^\circ\text{C}$ . The residue was washed with cold  $\text{Et}_2\text{O}$  ( $-50^\circ\text{C}$ ) three times. The remaining solid was dried under vacuum at  $-50^\circ\text{C}$  to afford 17 mg of the title compound as a dark red solid (90% yield.). Alternatively, the reaction could be carried out in  $\text{CD}_2\text{Cl}_2$  to allow the reaction mixture to be directly analyzed.

Spectral properties of **1** obtained by this procedure were identical to those reported above.

<sup>8</sup> We have previously reported data regarding the reactivity of complex **1** in the presence of exogenous **8** (*Nat. Chem.* **2009**, *1*, 302–309.). Based on a reinvestigation of the reactivity of the **1** with **8**, we have revised our original proposal that **8** can serve as a ligand for **1**. As is detailed below, no interaction between **1** and **8** can be detected by either  $^1\text{H}$  NMR or UV-vis spectroscopy (spectra below). The reproducible acceleration of C–Cl bond formation from **1** that has been observed in the presence of **8** is now believed to be a function of acidity (see above) and not *N*-ligation, as we proposed.

**Addition of Benzo[*h*]quinoline (8) to Complex 1**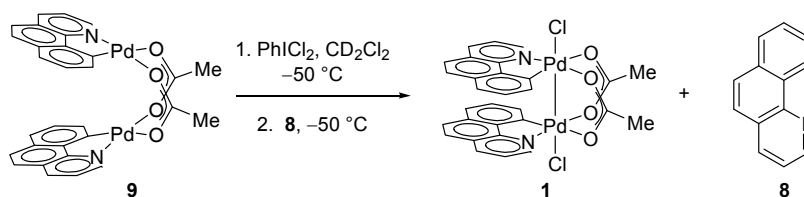

To a solution of benzo[*h*]quinolinyl palladium acetate dimer (**9**) (6.8 mg,  $9.8 \times 10^{-6}$  mol, 1.0 equiv) in CD<sub>2</sub>Cl<sub>2</sub> (1.0 mL) was added PhICl<sub>2</sub> (2.7 mg,  $9.8 \times 10^{-6}$  mol, 1.0 equiv) in one portion as a solid at -50 °C. After five minutes, benzo[*h*]quinoline (**8**) (7.0 mg,  $3.9 \times 10^{-5}$  mol, 4.0 equiv) was added at -50 °C.

<sup>1</sup>H NMR and UV-vis<sup>9</sup> spectroscopies provided no evidence of interaction between **1** and **8**.

---

<sup>9</sup> The UV-vis spectrum of **1** in the presence of **8** was also unchanged if acquired immediately following sample preparation at 23 °C. Further, UV-vis spectra obtained of **1** in a 0.5 M solution of **8** also did not show evidence of interaction between **1** and **8** (reproduced below).

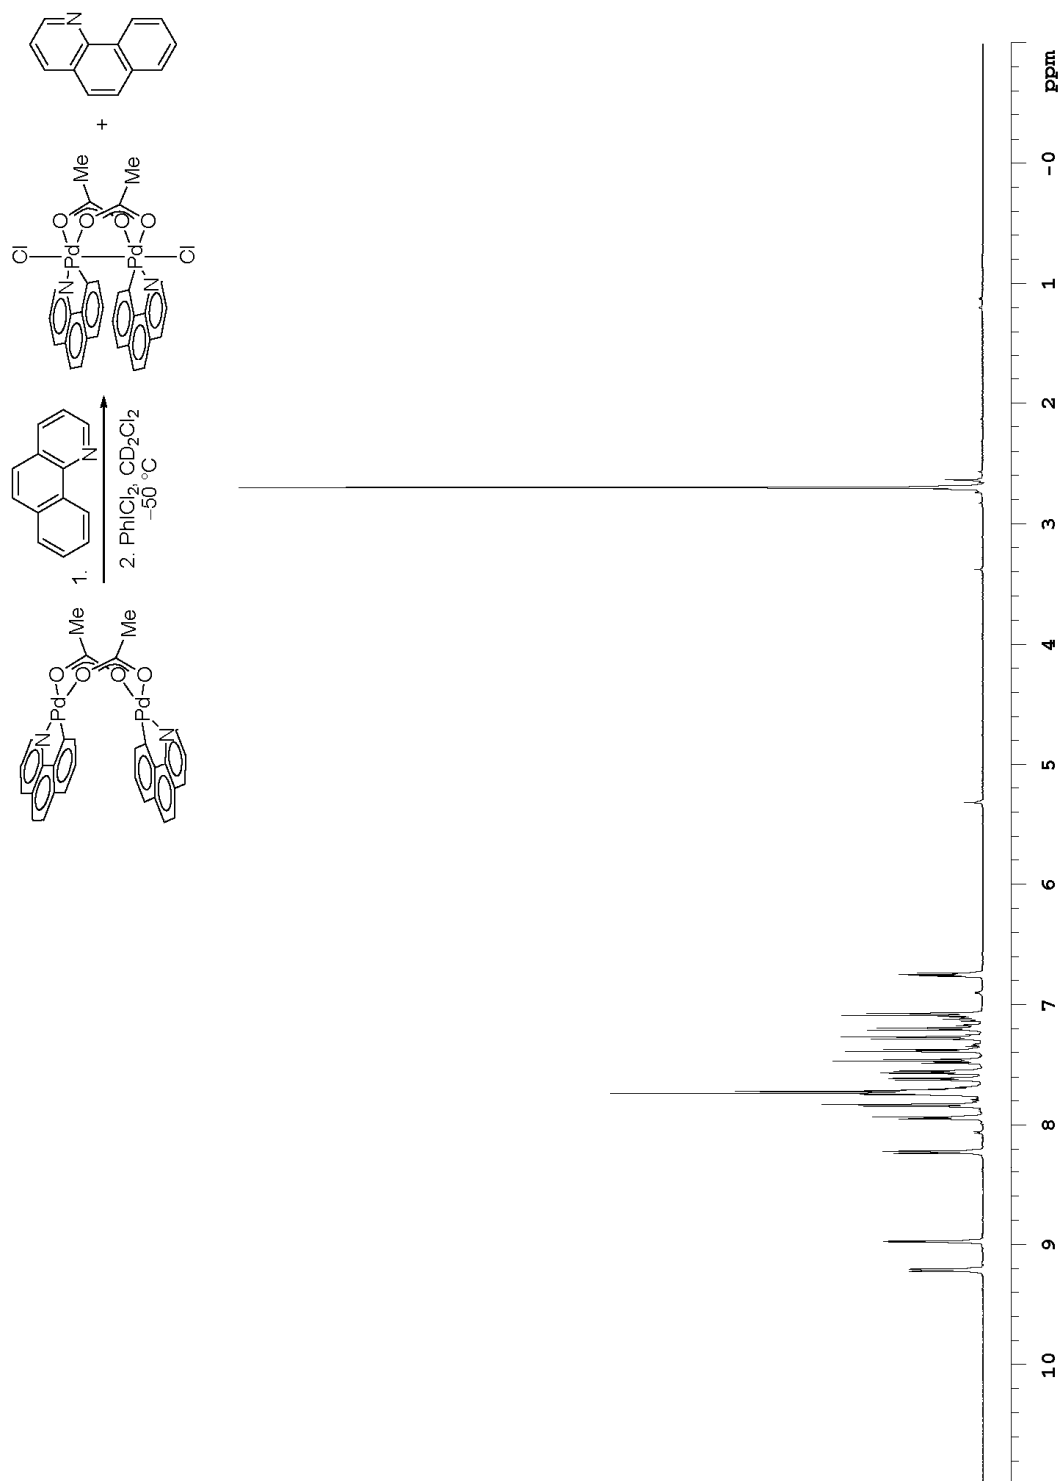

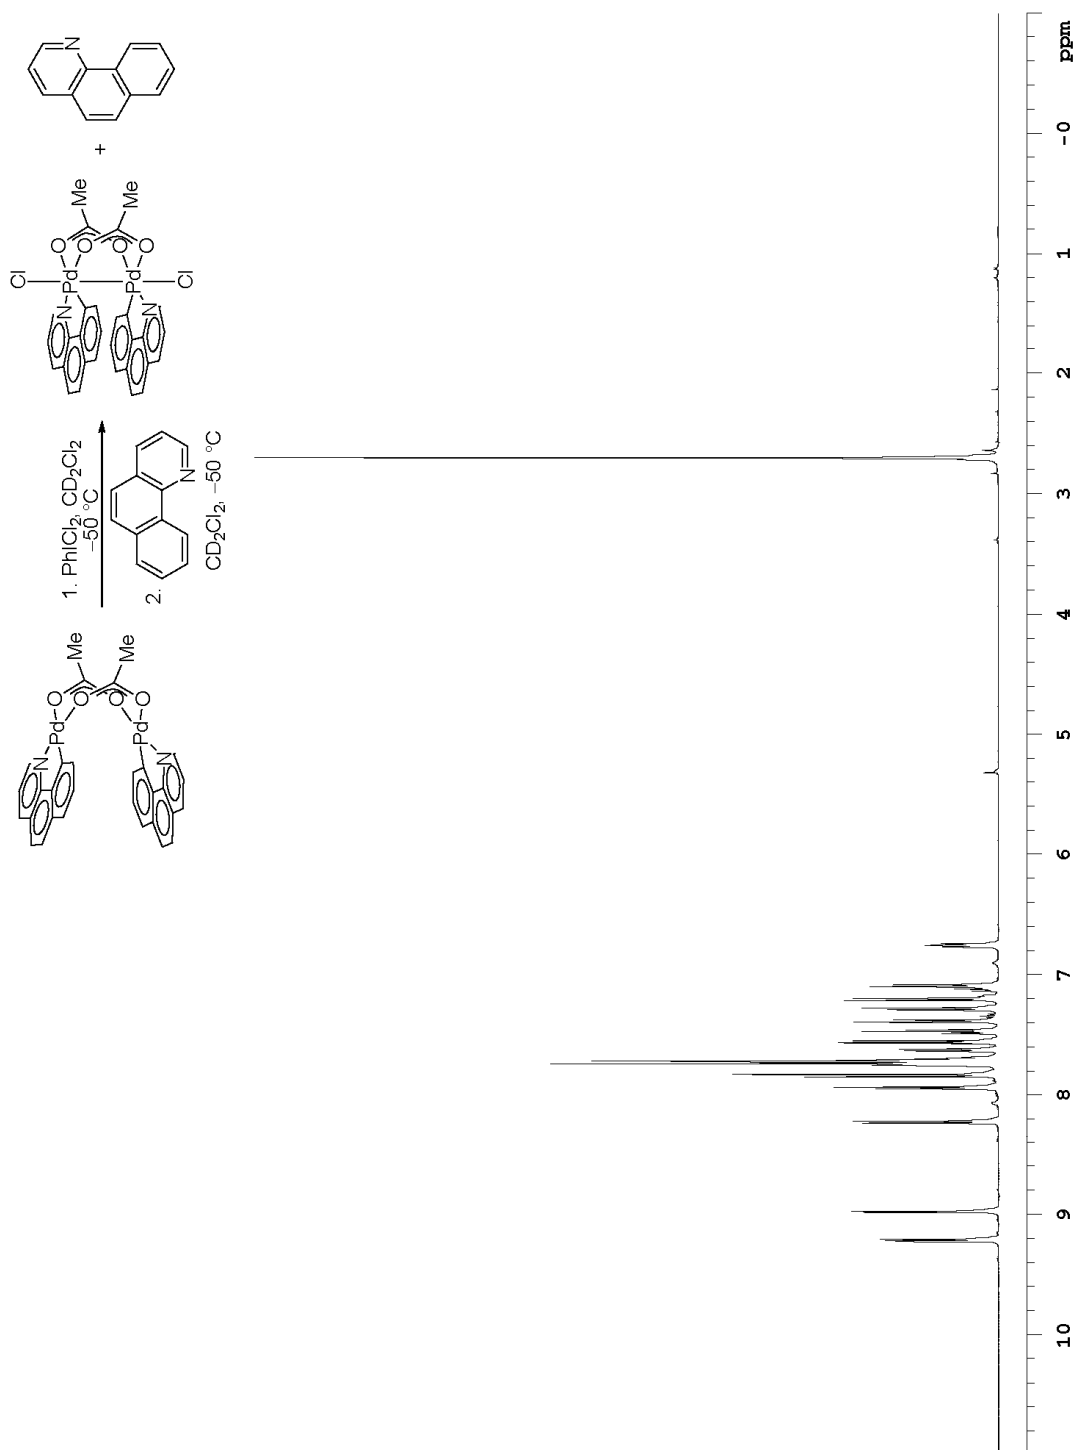

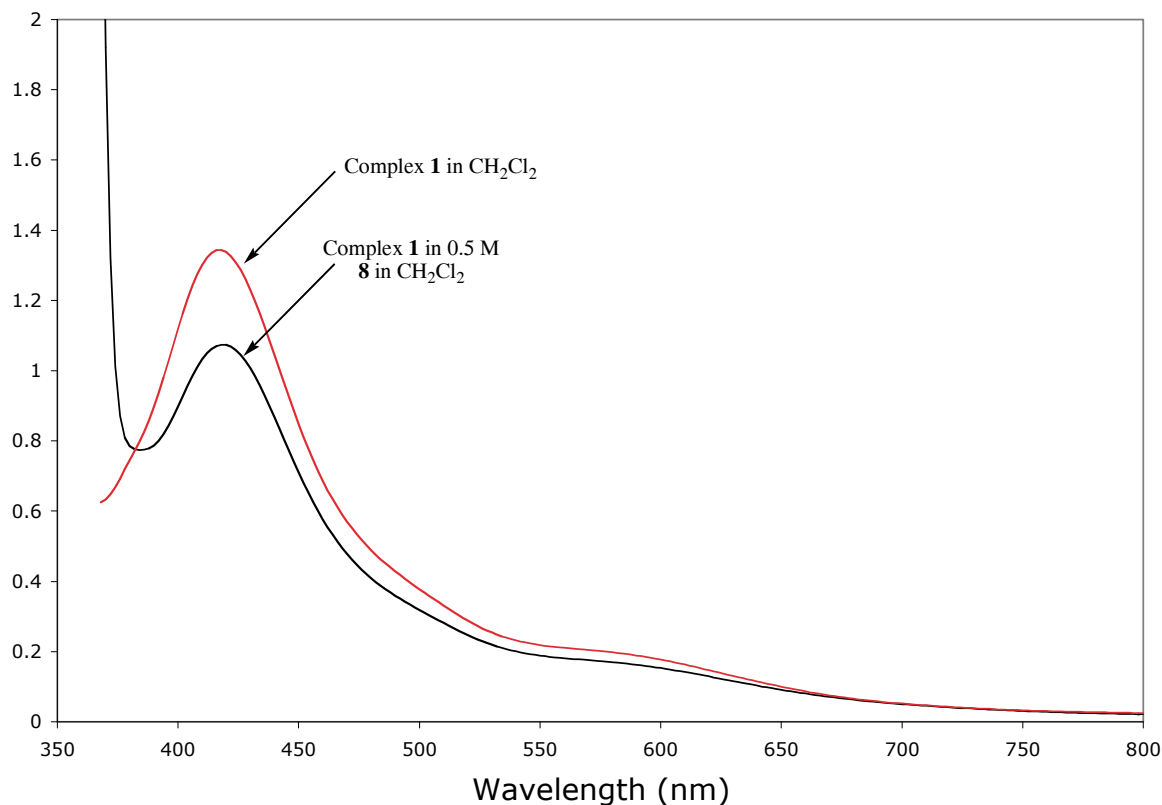

Above is a plot of the UV-vis spectra of **1** in CH<sub>2</sub>Cl<sub>2</sub> and in 0.5 M **8** in CH<sub>2</sub>Cl<sub>2</sub>. No change in the  $\lambda_{\max}$  above 400 nm can be observed. The plots deviate below 380 nm due to absorbances of the concentrated solution of **8** and thus this region can not be used to compare the UV-vis spectra of **1** in the different media employed.

### Rate of C–Cl Reductive Elimination from **1** in Presence of Exogenous **8**

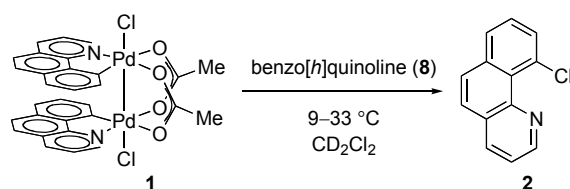

Stock solutions of compound **11** (29.2 mM) and benzo[*h*]quinoline (**8**) (104 mM) were prepared in CD<sub>2</sub>Cl<sub>2</sub>. In a nitrogen-filled dry box, compound **9** (350  $\mu$ L) was diluted with 250  $\mu$ L CD<sub>2</sub>Cl<sub>2</sub> in an NMR tube before 100  $\mu$ L of benzo[*h*]quinoline (**8**) solution was added to the NMR tube. PhICl<sub>2</sub> (2.8 mg, 1.00 equiv) was added to the NMR tube as a solid. <sup>1</sup>H NMR spectra were obtained; the evolution of **2** was monitored by the <sup>1</sup>H NMR signal at 9.12 ppm. These signals were integrated relative the residual proton signal from CD<sub>2</sub>Cl<sub>2</sub>. Time points were excluded for those spectra in which the monitored peak overlapped with other peaks. Since evolution of product was measured, linear natural log plots were

obtained by using an infinite time point set to 100% yield. In each case, the reactions were followed to greater than 3 half-lives. Data were fitted to a first order regression; plots, slopes, and  $R^2$  values are reported below.

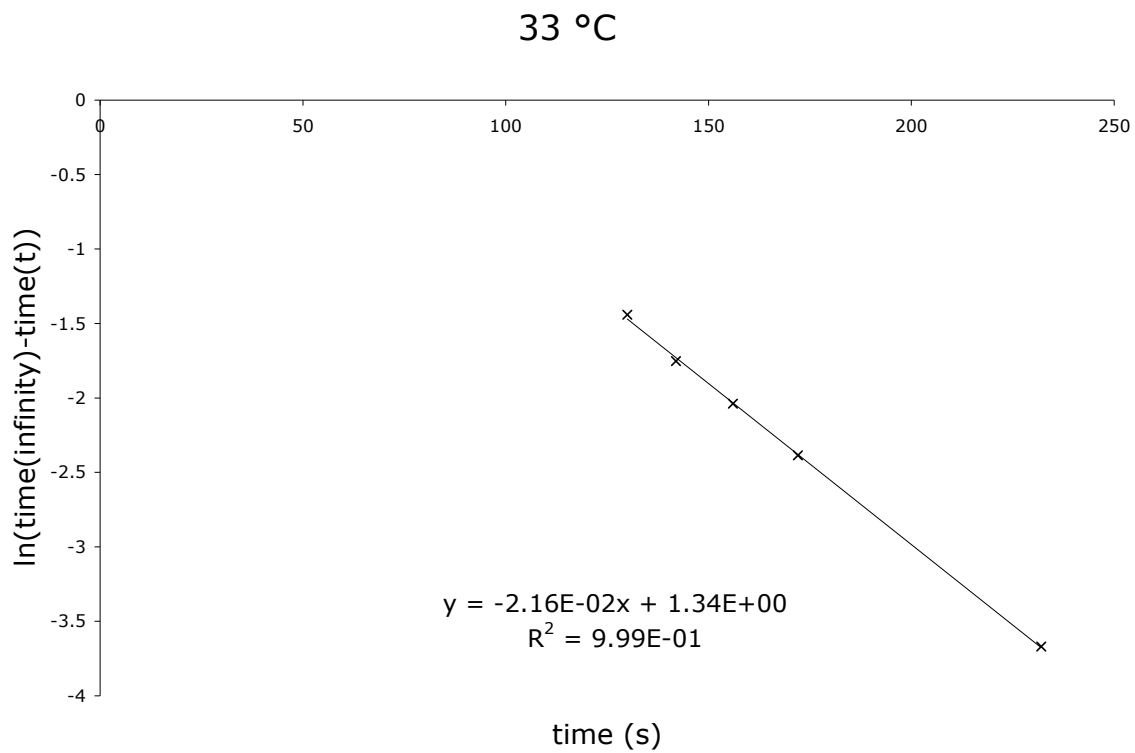

25 °C

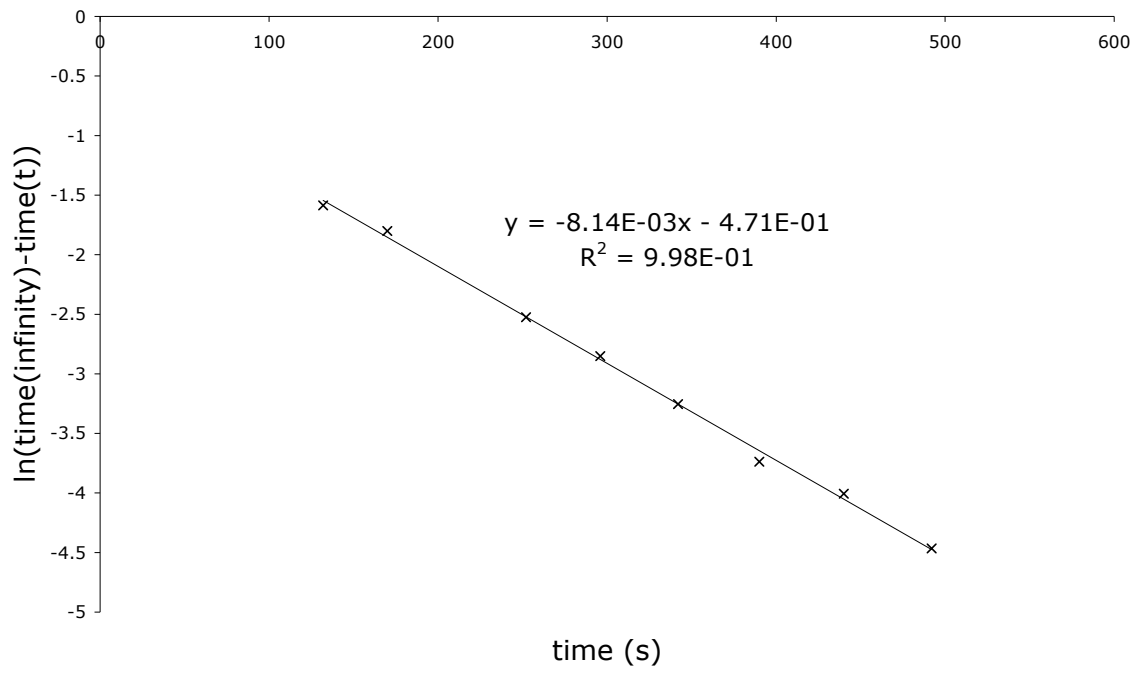

19 °C

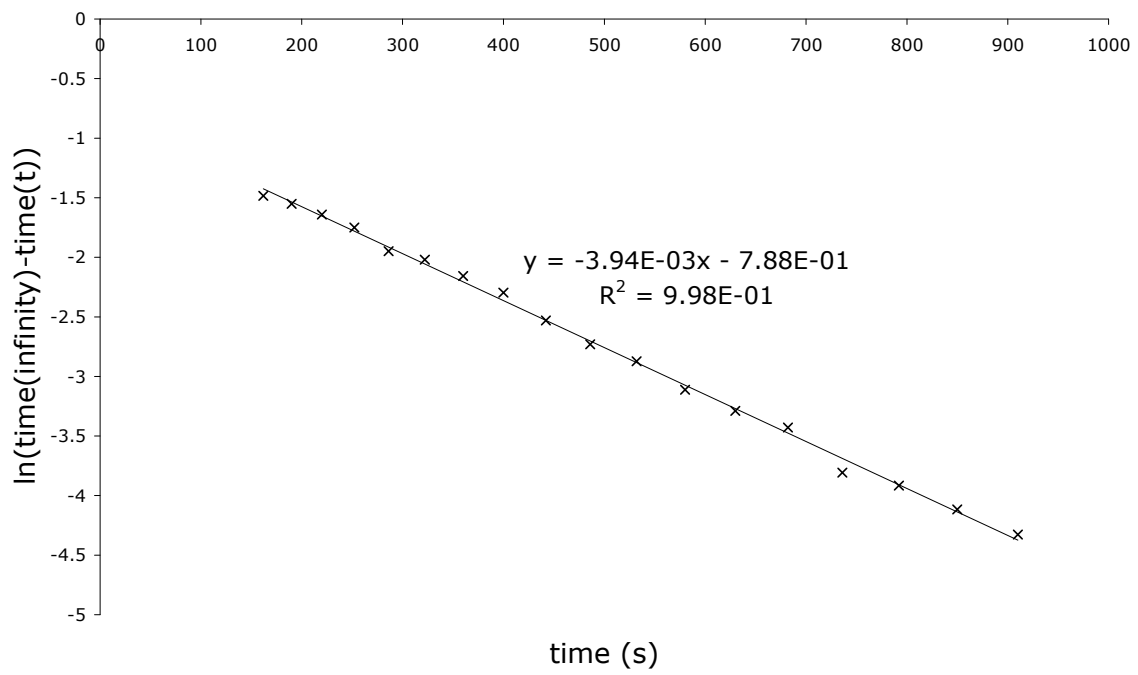



13 °C

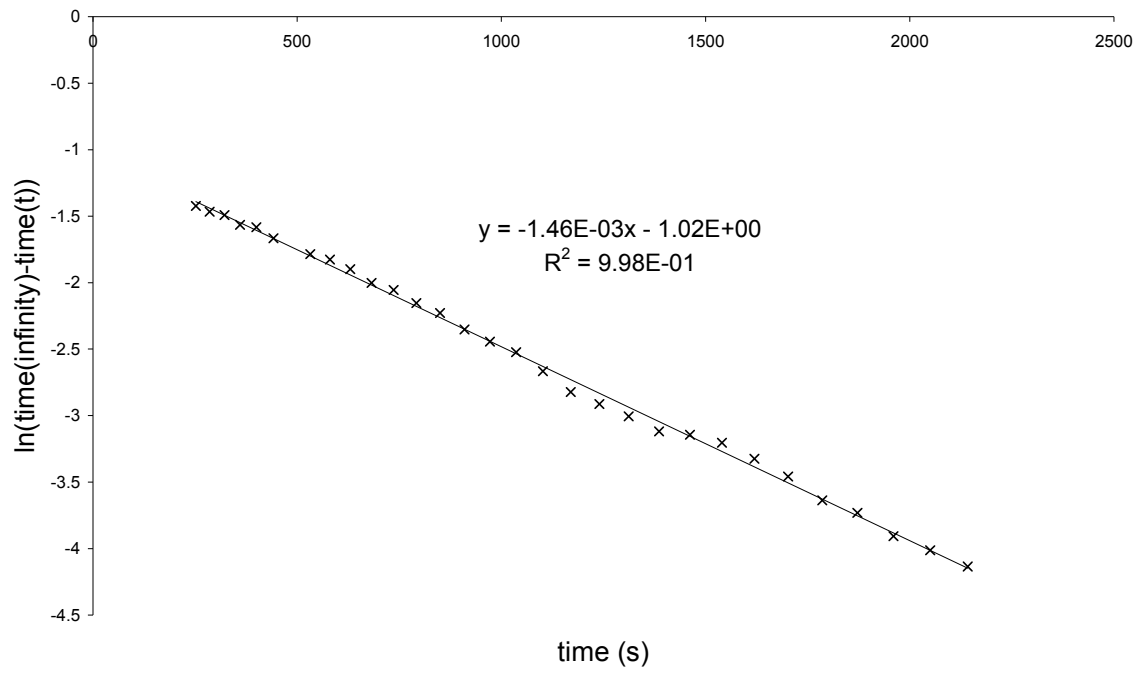

9 °C

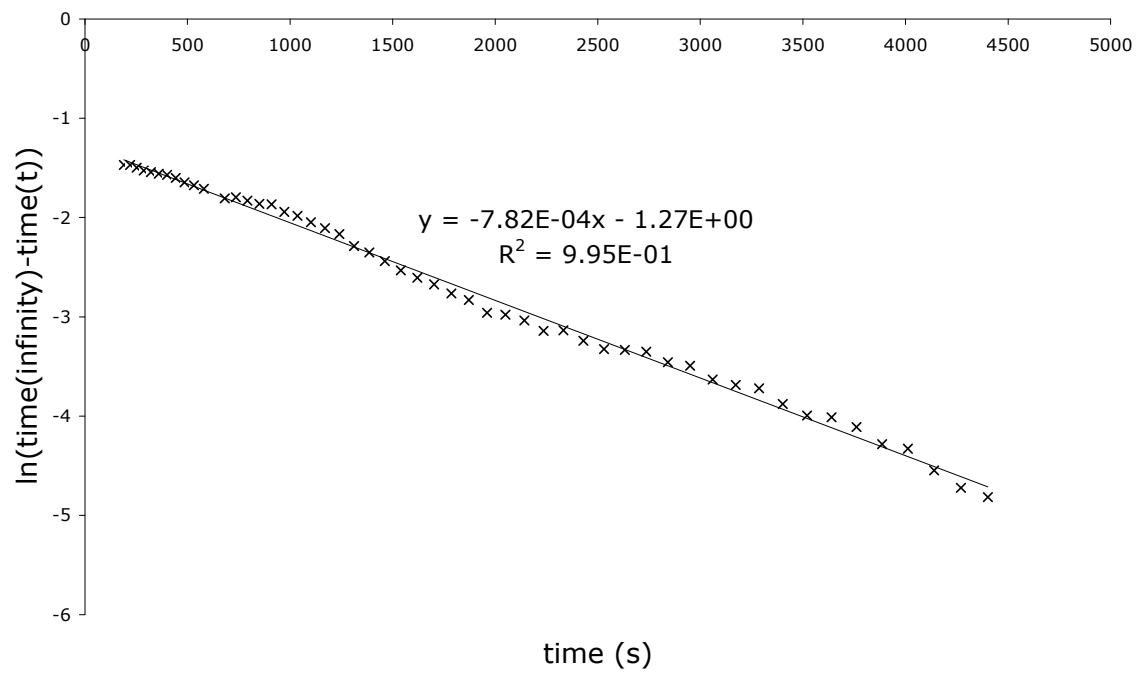

## Eyring Analysis

| <u>Temperature (K)</u> | <u><math>k</math> (s<sup>-1</sup>), R<sup>2</sup></u> |
|------------------------|-------------------------------------------------------|
| 282.41                 | $7.82 \times 10^{-4}$ ; 0.995                         |
| 286.16                 | $1.46 \times 10^{-3}$ ; 0.998                         |
| 291.75                 | $3.94 \times 10^{-3}$ ; 0.998                         |
| 298.40                 | $8.14 \times 10^{-3}$ ; 0.998                         |
| 306.02                 | $2.16 \times 10^{-2}$ ; 0.999                         |

Eyring Plot for Formation of **2** with Added **8**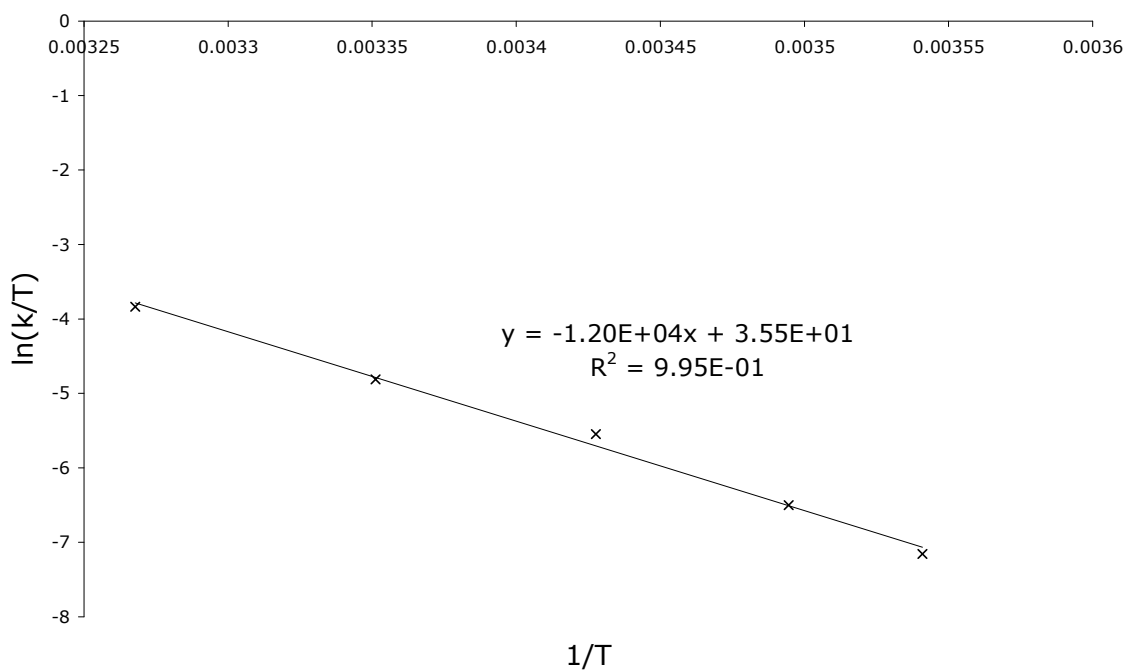

## Error Analysis for Eyring Data

|               | <u>Slope</u> | <u>Intercept</u> | <u><math>\Delta H^a</math></u> | <u>Difference</u> | <u><math>\Delta S^a</math></u> | <u>Difference</u> | <u><math>\Delta G^a</math></u> | <u>Difference</u> |
|---------------|--------------|------------------|--------------------------------|-------------------|--------------------------------|-------------------|--------------------------------|-------------------|
| calcd + error | -10083       | 23.19            | 20.0                           | -3.4              | -1.1                           | -11.3             | 20.3                           | -0.1              |
| calcd         | -11754       | 28.90            | 23.4                           | 0.0               | 10.2                           | 0.0               | 20.4                           | 0.0               |
| calcd - error | -13424       | 34.61            | 26.7                           | 3.3               | 21.6                           | 11.4              | 20.5                           | 0.1               |

**Rate of C–Cl Reductive Elimination from 1 as a Function of Concentration of 8**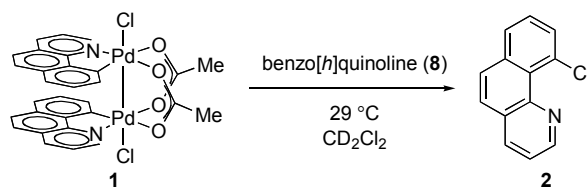

Stock solutions of compound **9** (19.4 mM), benzo[*h*]quinoline (**8**) (58.3 mM), and PhICl<sub>2</sub> (29.1 mM) were prepared in CD<sub>2</sub>Cl<sub>2</sub>. Samples were prepared by combining compound **9** solution (300 μL), PhICl<sub>2</sub> solution (200 μL), benzo[*h*]quinoline (**8**) solution (*n* μL), and CD<sub>2</sub>Cl<sub>2</sub> (300–*n*) in a nitrogen-purged NMR tube. <sup>1</sup>H NMR spectra were obtained; the evolution of **2** was monitored by the <sup>1</sup>H NMR signal at 9.12 ppm. These signals were integrated relative the residual proton signal from CD<sub>2</sub>Cl<sub>2</sub>. Time points were excluded for those spectra in which the monitored peak overlapped with other peaks. Since evolution of product was measured, linear natural log plots were obtained by using an infinite time point set to 100% yield. In each case, the reactions were followed to greater than 3 half-lives. Data were fitted to a first order regression; plots, slopes, and R<sup>2</sup> values are reported below.

**0.00 mM benzo[*h*]quinoline**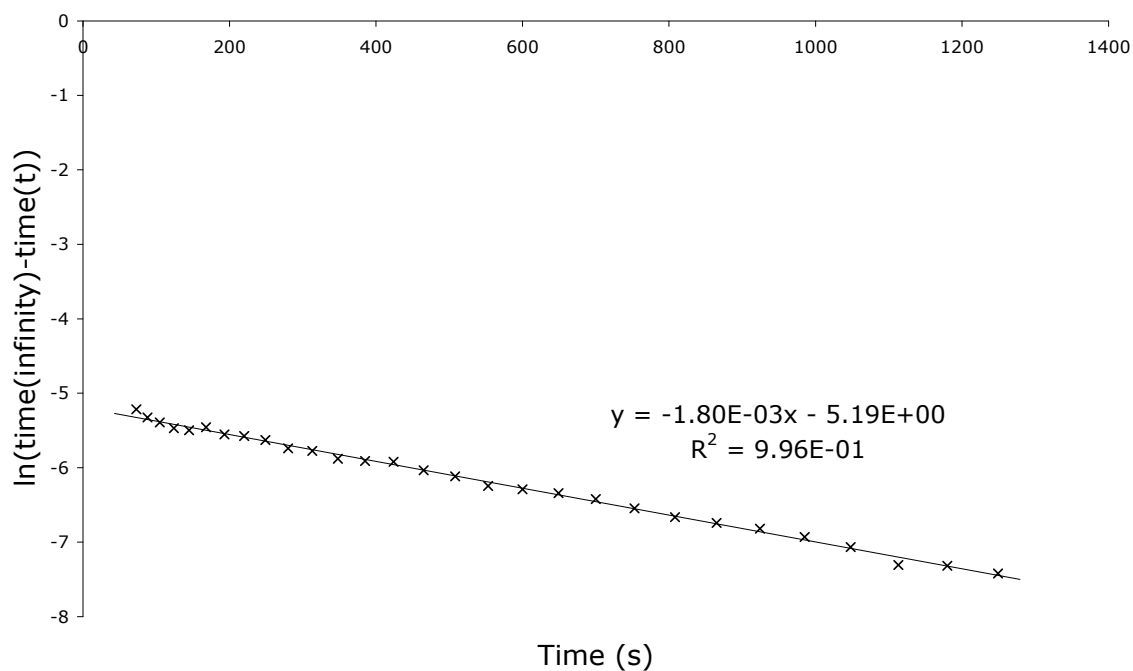

## 0.36 mM benzo[h]quinoline

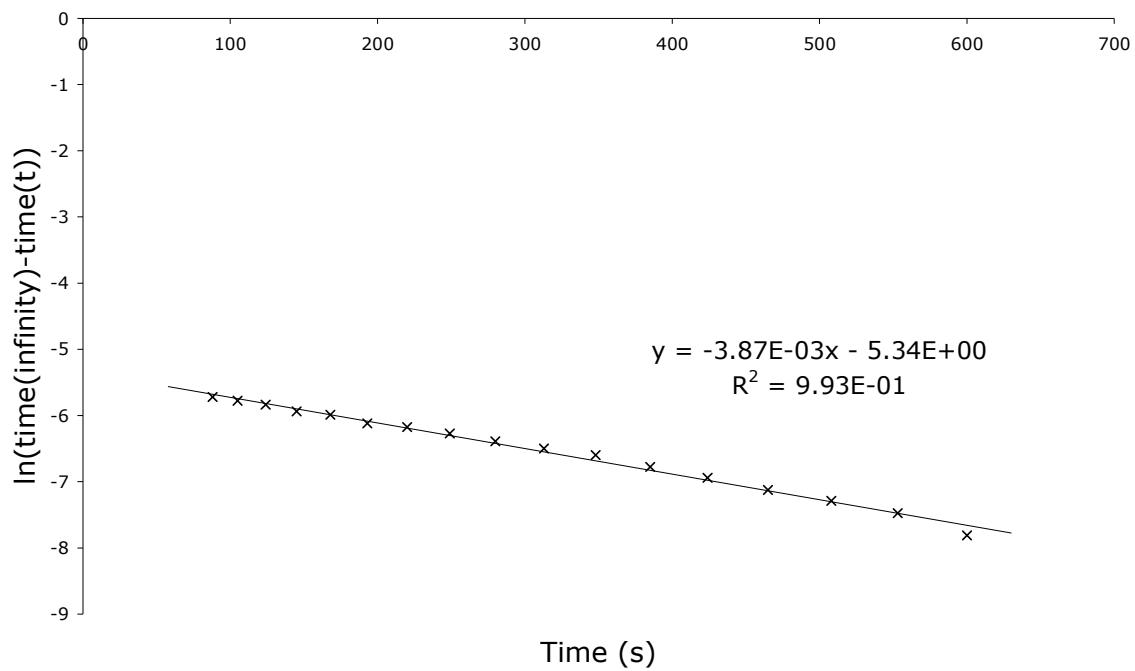

## 0.91 mM Benzo[h]quinoline

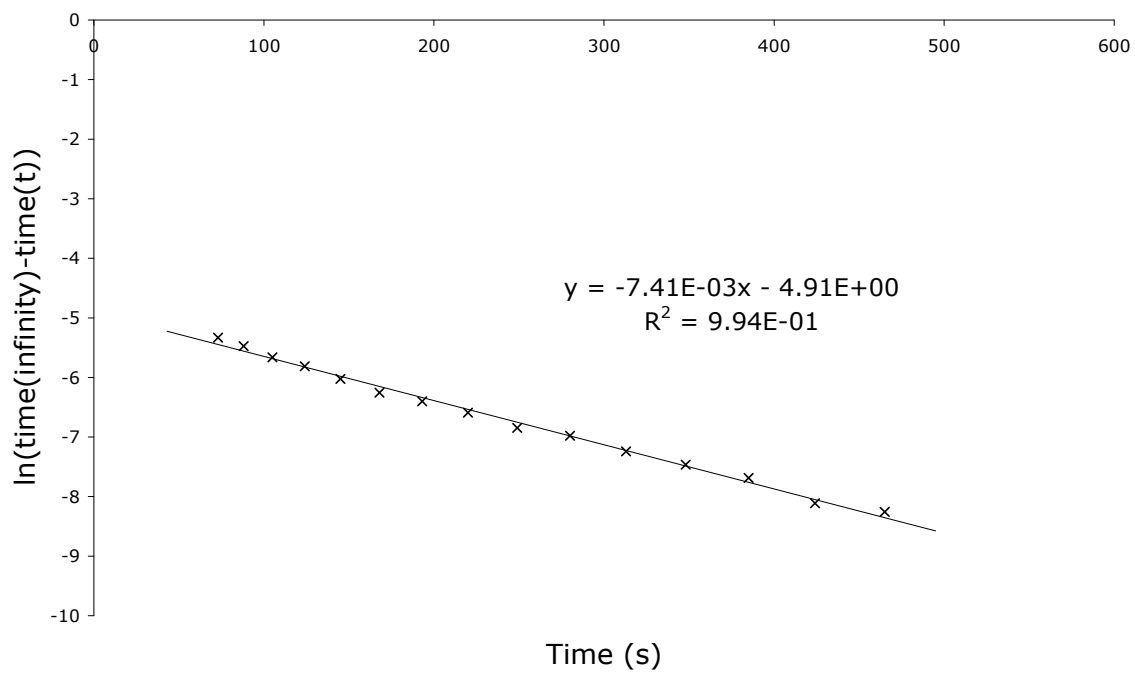

## 1.45 mM benzo[h]quinoline

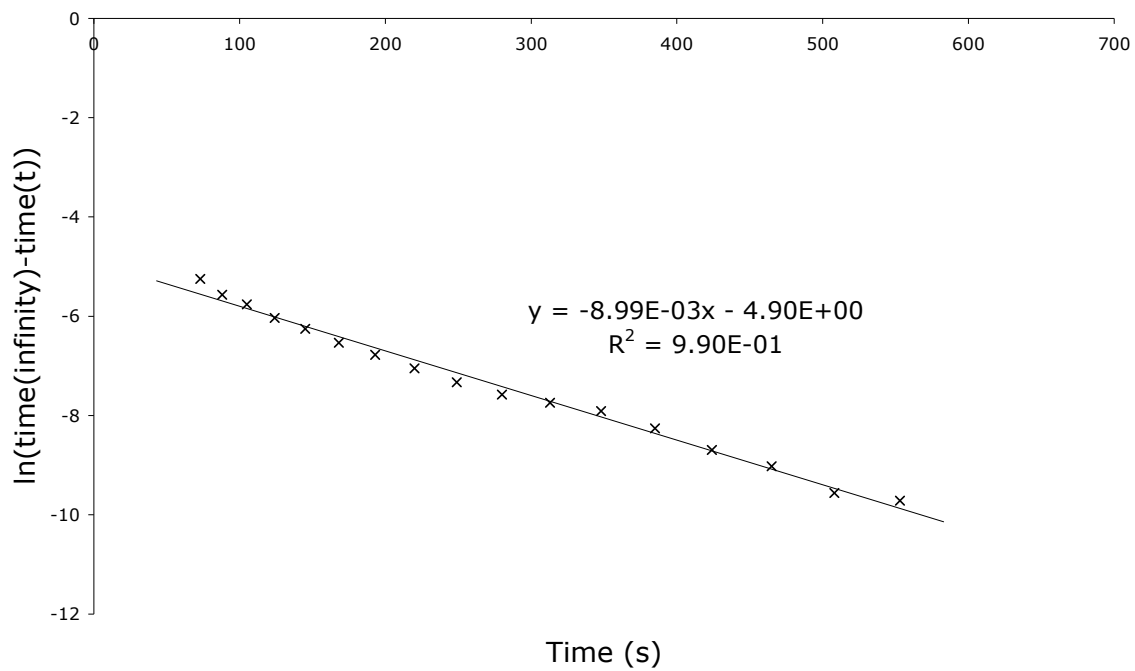

## 2.18 mM benzo[h]quinoline

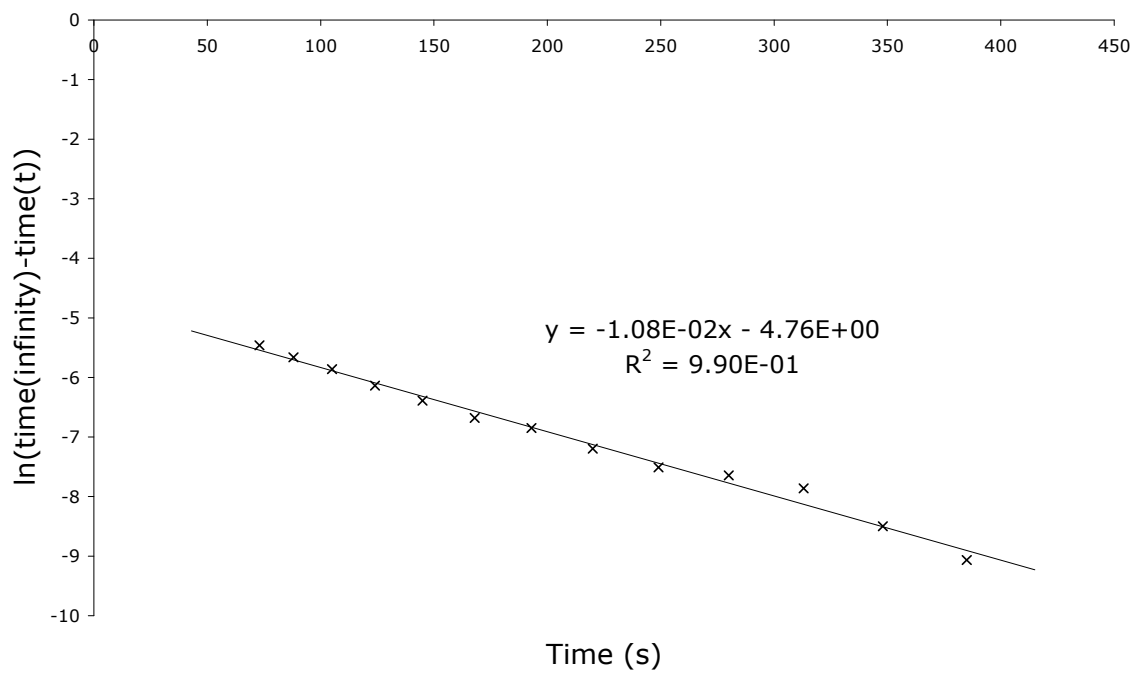

2.90 mM benzo[*h*]quinoline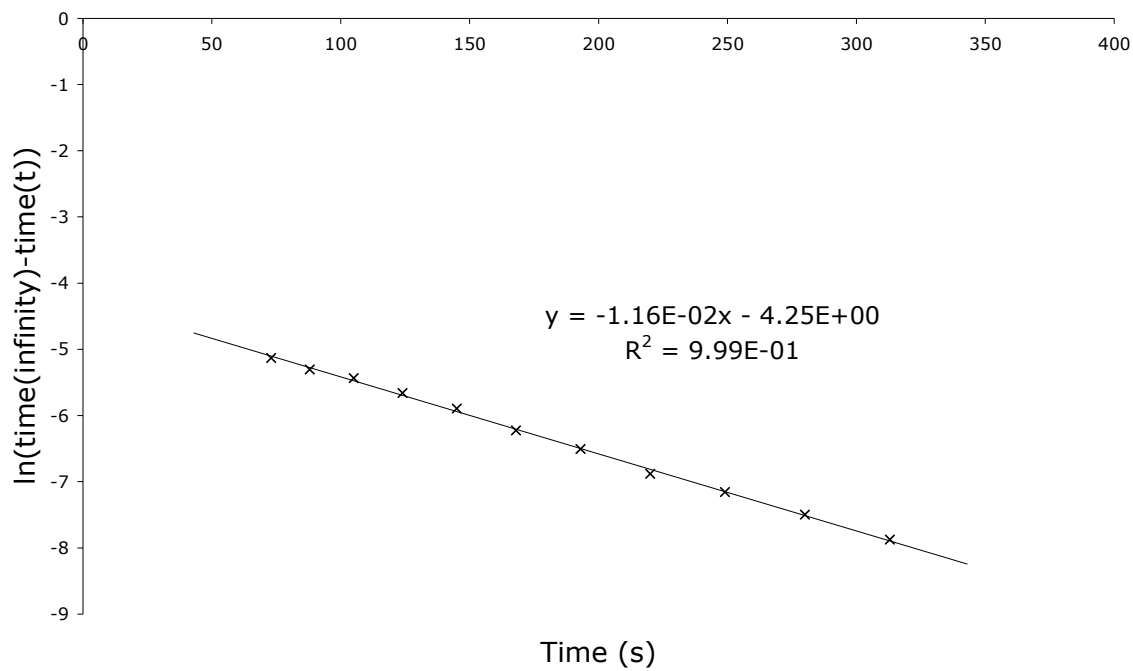4.35 mM benzo[*h*]quinoline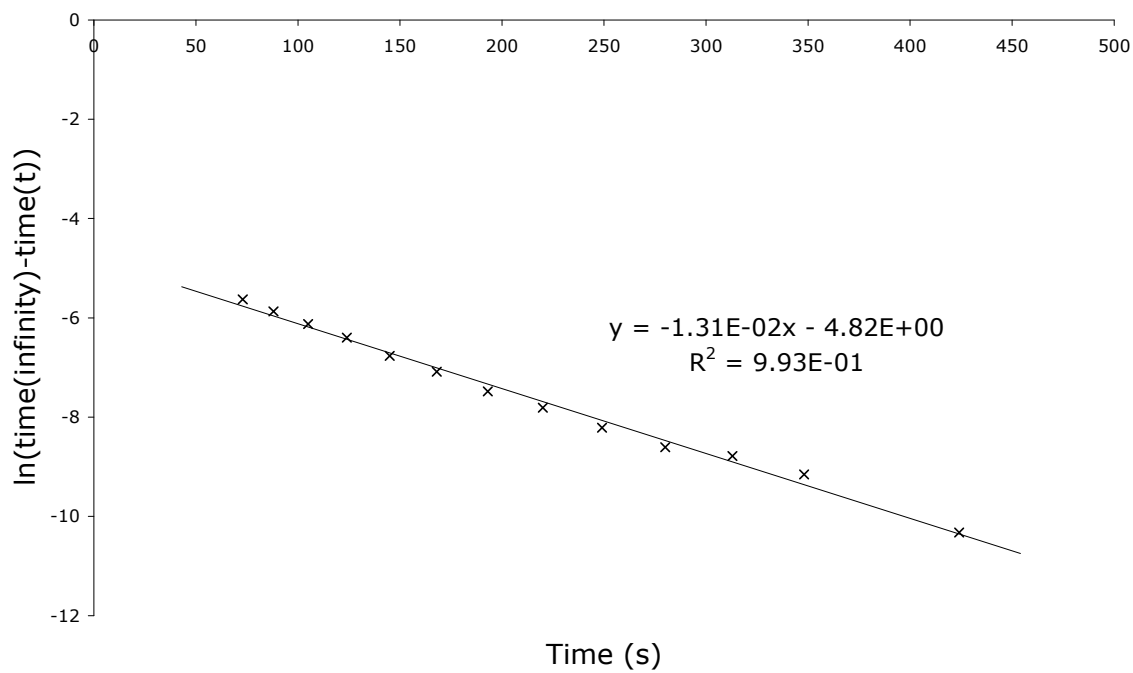

## 5.80 mM benzo[h]quinoline

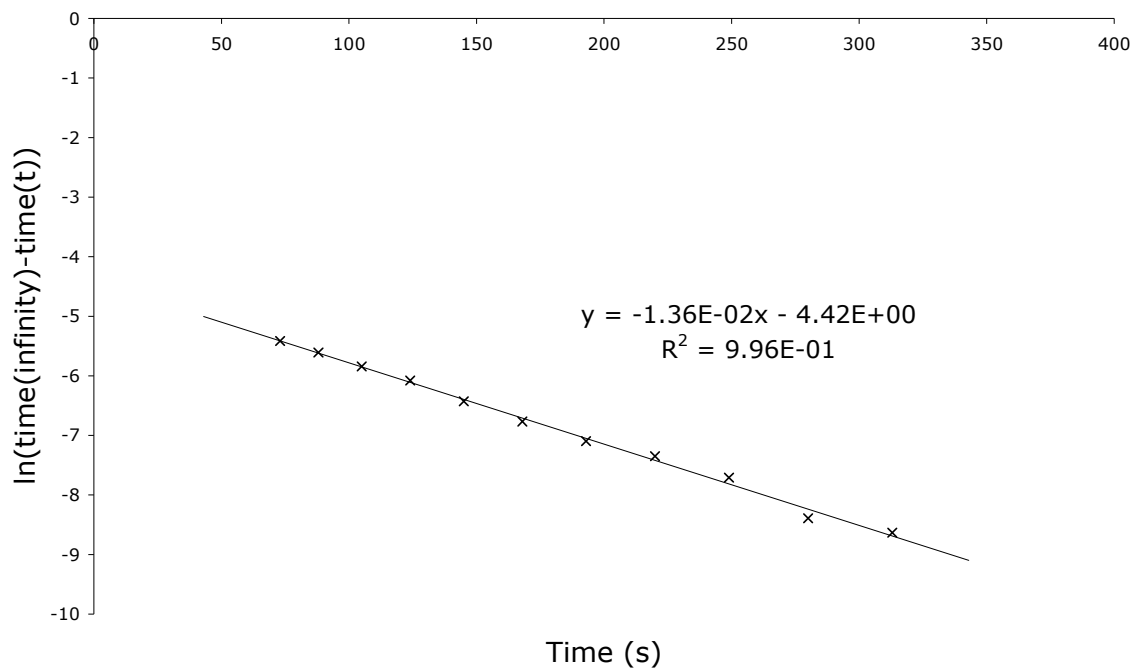

## 7.25 mM benzo[h]quinoline

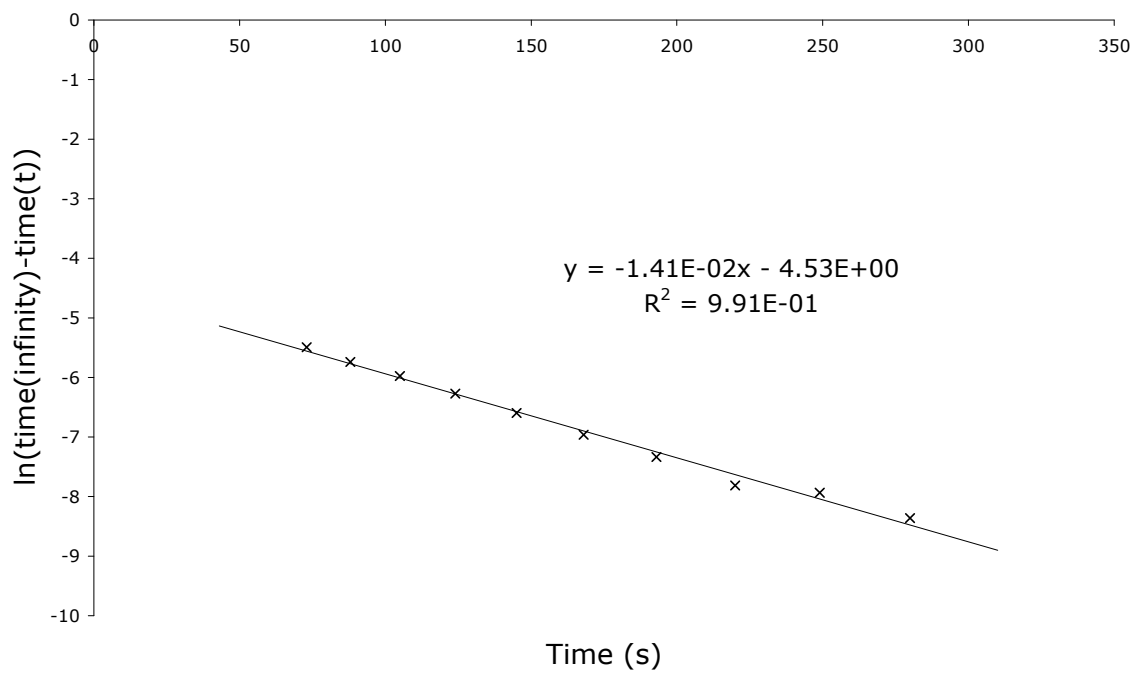

## 9.06 mM benzo[h]quinoline

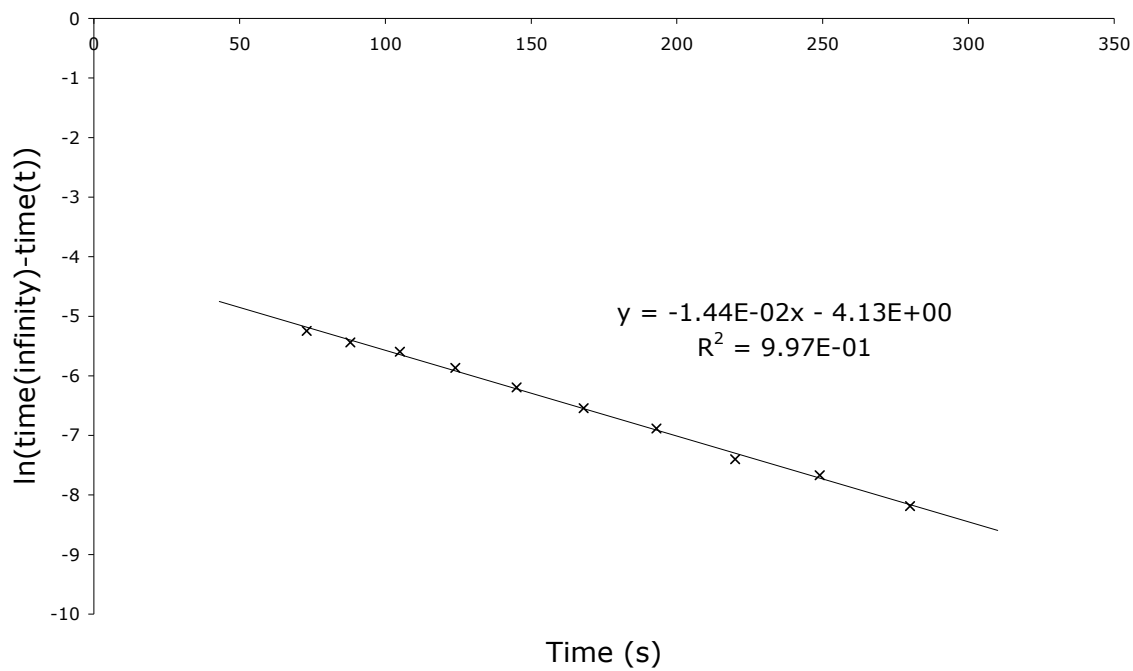

| <u>Concentration (mM)</u> | <u><math>k</math> (s<sup>-1</sup>), R<sup>2</sup></u> |
|---------------------------|-------------------------------------------------------|
| 0.00                      | $1.80 \times 10^{-3}$ ; 0.996                         |
| 0.36                      | $3.87 \times 10^{-3}$ ; 0.993                         |
| 0.91                      | $7.41 \times 10^{-3}$ ; 0.994                         |
| 1.45                      | $8.99 \times 10^{-3}$ ; 0.990                         |
| 2.18                      | $1.08 \times 10^{-2}$ ; 0.990                         |
| 2.90                      | $1.16 \times 10^{-2}$ ; 0.999                         |
| 4.35                      | $1.31 \times 10^{-2}$ ; 0.993                         |
| 5.80                      | $1.36 \times 10^{-2}$ ; 0.996                         |
| 7.25                      | $1.41 \times 10^{-2}$ ; 0.991                         |
| 9.06                      | $1.44 \times 10^{-2}$ ; 0.997                         |



Rate Constant ( $k$ ) vs. [benzo[ $h$ ]quinoline]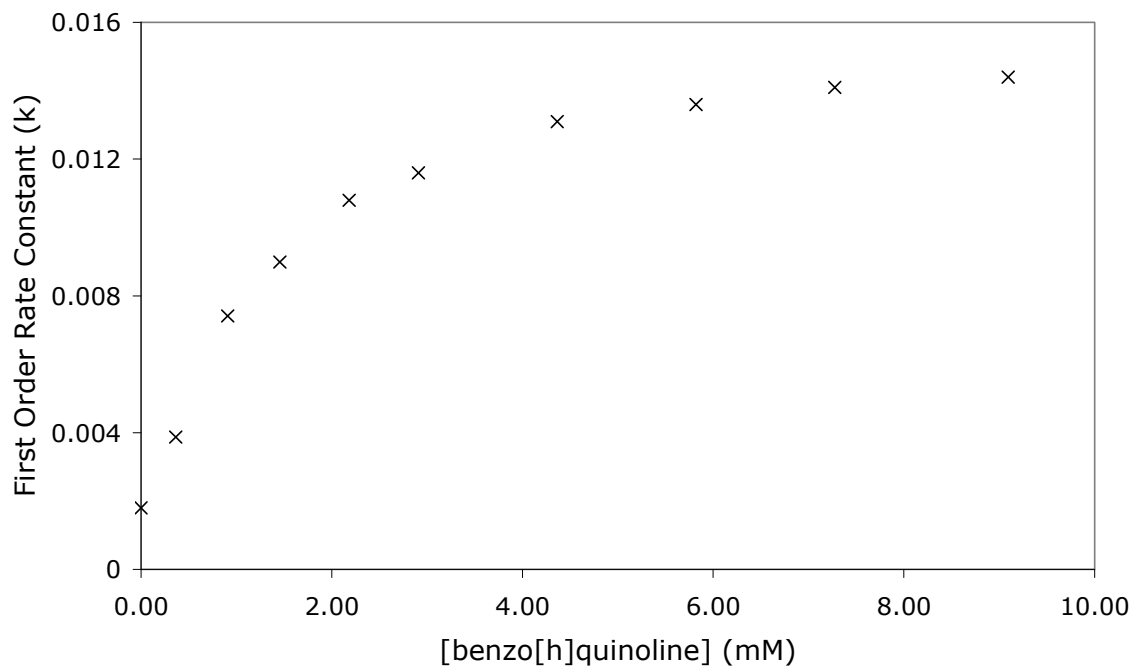

Lineweaver-Burk Plot

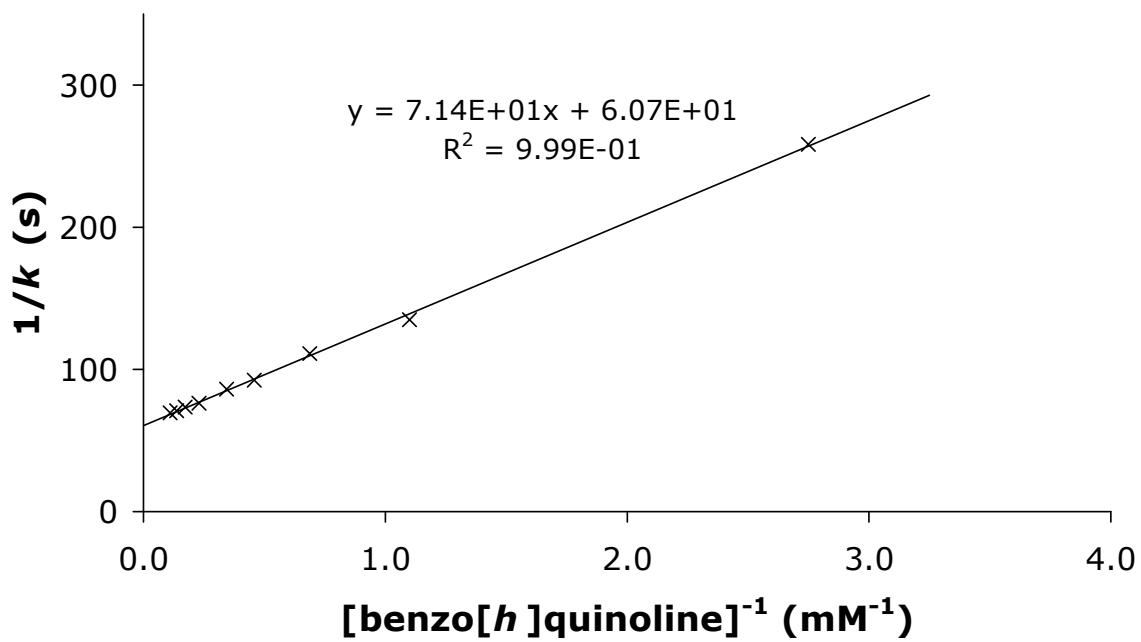

Supplement: NIHMS238678-supplement-1_si_001.pdf [file NIHMS238678-supplement-1_si_001.pdf]
